# Supplementary material for: A survey of functional genomic variation in domesticated chickens
Source: Springer Nature journal article supplement (doi:10.1186/s12711-018-0390-1), 2018-04-16
Supplement: MOESM1 [file 12711_2018_390_MOESM1_ESM.pdf]

## Additional file 1

**Table S1: Statistics per breed.**

| Breed      | # 60K Genotyped individuals | # Animal post-filtering | # Trios | Markers post filtering |
|------------|-----------------------------|-------------------------|---------|------------------------|
| W1         | 7,197                       | 7,195                   | 3,619   | 28,637                 |
| WA         | 4,409                       | 4,408                   | 2,291   | 21,412                 |
| Crossbreds | 3,983                       | 3,983                   | 3,539   | 42,304                 |
| B1_B2      | 6,737                       | 6,737                   | 3,118   | 37,560                 |
| Total      | 22,326                      | 22,323                  | 12,567  | -                      |

**Table S2: Candidate mutations in regions of missing homozygosity.**

| CHR  | Start (Mb) | Stop (Mb) | Line | Candidate variant                   | Sift | Provean |
|------|------------|-----------|------|-------------------------------------|------|---------|
| Chr2 | 56.0       | 56.5      | CB   | 56228028 C>G Intragenic (ADNP2) C>S | 0.5  | 2.28    |
| Chr3 | 94.125     | 94.875    | CB   | 94938357C>G Intragenic (SOX11) A>G  | 0.2  | -1.815  |

**Table S3: Single nucleotide variants (SNV) and indels called.**

| Chromosome   | SNV              | Indel          | Variants          | Chromosome length  | Var/Kb        |
|--------------|------------------|----------------|-------------------|--------------------|---------------|
| Chr1         | 1,971,111        | 169,649        | 2,140,760         | 196,202,544        | 10.911        |
| Chr2         | 1,486,364        | 132,306        | 1,618,670         | 149,560,735        | 10.823        |
| Chr3         | 1,058,154        | 96,426         | 1,154,580         | 111,302,122        | 10.373        |
| Chr4         | 922,021          | 86,916         | 1,008,937         | 91,282,656         | 11.053        |
| Chr5         | 620,753          | 51,964         | 672,717           | 59,825,302         | 11.245        |
| Chr6         | 448,712          | 34,075         | 482,787           | 35,467,016         | 13.612        |
| Chr7         | 398,061          | 32,354         | 430,415           | 36,946,936         | 11.650        |
| Chr8         | 300,013          | 23,751         | 323,764           | 29,963,013         | 10.805        |
| Chr9         | 270,342          | 20,788         | 291,130           | 24,091,566         | 12.084        |
| Chr10        | 212,953          | 16,484         | 229,437           | 20,435,342         | 11.227        |
| Chr11        | 191,204          | 15,863         | 207,067           | 20,218,793         | 10.241        |
| Chr12        | 218,662          | 16,807         | 235,469           | 19,948,154         | 11.804        |
| Chr13        | 188,765          | 13,637         | 202,402           | 18,407,460         | 10.996        |
| Chr14        | 169,624          | 12,743         | 182,367           | 15,595,052         | 11.694        |
| Chr15        | 110,915          | 8,272          | 119,187           | 12,762,846         | 9.339         |
| Chr16        | 6,599            | 286            | 6,885             | 652,338            | 10.554        |
| Chr17        | 111,023          | 7,421          | 118,444           | 10,956,400         | 10.810        |
| Chr18        | 114,860          | 7,758          | 122,618           | 11,053,727         | 11.093        |
| Chr19        | 96,983           | 6,728          | 103,711           | 9,979,828          | 10.392        |
| Chr20        | 142,351          | 9,975          | 152,326           | 14,109,371         | 10.796        |
| Chr21        | 71,739           | 4,940          | 76,679            | 6,862,722          | 11.173        |
| Chr22        | 24,781           | 1,807          | 26,588            | 4,729,743          | 5.621         |
| Chr23        | 60,640           | 3,730          | 64,370            | 5,786,528          | 11.124        |
| Chr24        | 71,099           | 4,360          | 75,459            | 6,280,547          | 12.015        |
| Chr25        | 20,497           | 1,146          | 21,643            | 2,906,300          | 7.447         |
| Chr26        | 58,179           | 3,560          | 61,739            | 5,313,770          | 11.619        |
| Chr27        | 61,154           | 3,286          | 64,440            | 5,655,794          | 11.394        |
| Chr28        | 49,981           | 3,116          | 53,097            | 4,974,273          | 10.674        |
| Chr33        | 11,868           | 721            | 12,589            | 1,648,031          | 7.639         |
| <b>Total</b> | <b>9,469,408</b> | <b>790,869</b> | <b>10,260,277</b> | <b>932,918,909</b> | <b>10.998</b> |

**Table S4: Line summary of identified variants.** Novel variants were not present in dbSNP version 147.

|                     | WA      | WD        | W1        | WA_WD   | WA_W1   | WD_W1   | WA_WD_W1  | Overall    |
|---------------------|---------|-----------|-----------|---------|---------|---------|-----------|------------|
| <b>Variants</b>     | 728,436 | 1,157,962 | 1,084,834 | 501,501 | 735,794 | 982,922 | 5,068,828 | 10,260,277 |
| <b>Known VARs</b>   | 406,979 | 726,101   | 694,685   | 427,160 | 630,810 | 853,156 | 4,378,019 | 8,116,910  |
| <b>Novel VARs</b>   | 321,457 | 431,861   | 390,149   | 74,341  | 104,984 | 129,766 | 690,809   | 2,143,367  |
| <b>% Novel VARs</b> | 44.13   | 37.29     | 35.96     | 14.82   | 14.27   | 13.20   | 13.63     | 20.89      |

**Table S5: Call rate and TS/TV for all variants after filtering.**

| Chromosome | Call rate | TS      | TV      | TS/TV    |
|------------|-----------|---------|---------|----------|
| Chr1       | 0.944692  | 1129177 | 450334  | 2.51     |
| Chr2       | 0.944304  | 844945  | 334280  | 2.53     |
| Chr3       | 0.945744  | 603364  | 232126  | 2.6      |
| Chr4       | 0.945532  | 526798  | 203058  | 2.59     |
| Chr5       | 0.950012  | 386771  | 144338  | 2.68     |
| Chr6       | 0.956276  | 273390  | 106793  | 2.56     |
| Chr7       | 0.955404  | 244603  | 90565   | 2.7      |
| Chr8       | 0.952972  | 187062  | 66997   | 2.79     |
| Chr9       | 0.956952  | 164844  | 59965   | 2.75     |
| Chr10      | 0.955428  | 132331  | 46157   | 2.87     |
| Chr11      | 0.951136  | 117524  | 42576   | 2.76     |
| Chr12      | 0.955512  | 136799  | 47661   | 2.87     |
| Chr13      | 0.95844   | 120664  | 42106   | 2.87     |
| Chr14      | 0.95624   | 109004  | 37016   | 2.94     |
| Chr15      | 0.957284  | 70656   | 23239   | 3.04     |
| Chr16      | 0.815256  | 5015    | 2685    | 1.87     |
| Chr17      | 0.960776  | 70915   | 22790   | 3.11     |
| Chr18      | 0.94992   | 74016   | 26073   | 2.84     |
| Chr19      | 0.958604  | 64273   | 20885   | 3.08     |
| Chr20      | 0.958244  | 91152   | 30545   | 2.98     |
| Chr21      | 0.956732  | 46518   | 15382   | 3.02     |
| Chr22      | 0.94512   | 16774   | 5564    | 3.01     |
| Chr23      | 0.950632  | 40665   | 12612   | 3.22     |
| Chr24      | 0.961016  | 45112   | 14177   | 3.18     |
| Chr25      | 0.891384  | 13412   | 4327    | 3.1      |
| Chr26      | 0.946696  | 38697   | 11916   | 3.25     |
| Chr27      | 0.894332  | 42426   | 18632   | 2.28     |
| Chr28      | 0.924016  | 32957   | 10700   | 3.08     |
| Chr33      | 0.9091    | 8077    | 2588    | 3.12     |
| Overall:   | 0.948088  | 5637941 | 2126087 | 2.651792 |

**Table S6: Functional annotation of variants (VEP)**

| Functional class                   | Total    |
|------------------------------------|----------|
| 3 prime UTR variant                | 65375    |
| 5 prime UTR variant                | 10357    |
| Frameshift variant *               | 518      |
| Inframe deletion *                 | 185      |
| Inframe insertion *                | 181      |
| Splice acceptor variant *          | 549      |
| Splice donor variant *             | 516      |
| Start lost *                       | 142      |
| Stop gained *                      | 275      |
| Stop lost *                        | 71       |
| Mature miRNA variant               | 108      |
| Upstream gene variant              | 647537   |
| Downstream gene variant            | 485199   |
| Missense variant                   | 33492    |
| Synonymous variant                 | 84096    |
| Non coding transcript exon variant | 35226    |
| Protein altering variant           | 34       |
| Coding sequence variant            | 90       |
| Splice region variant              | 17769    |
| Stop retained variant              | 35       |
| Intergenic variant                 | 4156199  |
| Intron variant                     | 4722323  |
| Sum (all variants)                 | 10260277 |
| Sum (LoF)                          | 2437     |

\* LoF: splice acceptor variant, inframe deletion, splice donor variants, inframe insertion, stop lost, stop gained, start lost, frameshift variant.

**Table S7: Final list of deleterious variants identified in nine different classes.**

| Variant class / Breed   | WA  | WD  | W1  | WA_WD | WA_W1 | WD_W1 | WA_WD_W1 | Sum  |
|-------------------------|-----|-----|-----|-------|-------|-------|----------|------|
| Splice acceptor variant | 14  | 32  | 33  | 24    | 37    | 40    | 281      | 461  |
| Inframe deletion        | 4   | 10  | 22  | 13    | 10    | 11    | 69       | 139  |
| Splice donor variant    | 20  | 42  | 35  | 22    | 25    | 45    | 240      | 429  |
| Inframe insertion       | 4   | 13  | 9   | 9     | 7     | 11    | 61       | 114  |
| Stop lost               | 1   | 3   | 0   | 1     | 1     | 4     | 11       | 21   |
| Stop gained             | 5   | 16  | 9   | 5     | 12    | 7     | 33       | 87   |
| Start lost              | 4   | 5   | 2   | 1     | 2     | 3     | 26       | 43   |
| Frameshift variant      | 9   | 19  | 16  | 12    | 13    | 10    | 107      | 186  |
| Deleterious missense    | 208 | 420 | 311 | 174   | 259   | 297   | 1070     | 2739 |
| Sum                     | 269 | 560 | 437 | 261   | 366   | 428   | 1898     | 4219 |

**Table S8: Fertility phenotypes for three CxC matings that carry the OFD1 (Y19C) missense mutation.**

| <b>Eggs Set</b> | <b>Embryos Died</b> | <b>Eggs Fertile</b> | <b>Eggs Transferred</b> | <b>Total Hatched</b> | <b>%Fertility</b> | <b>%Hatch of Fertile</b> | <b>%Hatch of Set</b> | <b>%Hatch of Transferred</b> | <b>%Embryo died</b> |
|-----------------|---------------------|---------------------|-------------------------|----------------------|-------------------|--------------------------|----------------------|------------------------------|---------------------|
| 12              | 2                   | 12                  | 10                      | 8                    | 100.00%           | 66.67%                   | 66.67%               | 80.00%                       | 16.67%              |
| 11              | 2                   | 11                  | 9                       | 8                    | 100.00%           | 72.73%                   | 72.73%               | 88.89%                       | 18.18%              |
| 13              | 1                   | 12                  | 11                      | 9                    | 92.31%            | 75.00%                   | 69.23%               | 81.82%                       | 7.69%               |
|                 |                     |                     |                         | <b>CxNC (N=402)</b>  | <b>86.52</b>      | <b>84.57%</b>            | <b>73.93%</b>        | <b>87.25%</b>                | <b>2.83%</b>        |
|                 |                     |                     |                         | <b>W1 Overall</b>    | <b>84.28%</b>     | <b>83.29%</b>            | <b>71.09%</b>        | <b>86.51%</b>                | <b>3.29%</b>        |
