# Supplementary material for: A survey of functional genomic variation in domesticated chickens
Source: Genet Sel Evol. 2018 Apr 16;50:17. doi: 10.1186/s12711-018-0390-1 (PMC5902831; doi:10.1186/s12711-018-0390-1)
Supplement: Supplementary file 3 — Additional file 3: Table S1. Haplotypes exhibiting missing or depleted homozygosity in the WA line. Table S2. Haplotypes exhibiting missing or depleted homozygosity in CB lines. Table S3. Haplotypes exhibiting missing or depleted homozygosity in the W1 line. Table S4. Haplotypes exhibiting missing or depleted homozygosity in the B1-B2 line. [file 12711_2018_390_MOESM3_ESM.xlsx]

## Sheet: Description
Chr	Chromsome
Start	Start position
Stop	End position
Haplotype	Haplotype coded as 0,1
Haplotype_length	Haplotype length
#Haplotypes_in_window	Total number of haplotypes the window with frequency >= 0.5%
Frequencies_haplotypes_in_window	Haplotype frequencies in descending order
Haplotype_count	Number of animals that carry the haplotype
#Homozygous	Number of homozygotes observed for the haplotype
Haplotype_frequency	Frequency of the haplotype
#Sires	Number of sires that carry the haplotype
#Dams	Number of dams that carry the haplotype
Homozygotes_expected_(frequency)	Homozygous expected based on frequency estimate
Homozygotes_expected_(pedigree)	Homozygous expected based on pedigree (inferred from C x C matings)
#Pedigree_carrier_matings	Number of carrier matings in the pedigree
Excact_binomial_test	Excact binomial test
Genes_in_window	Genes in the haplotype window
Phenotypes	Phenotypes associatied with null-mutant mice
#Carrier_progeny	Number of carrier progeny
#Heterozygote_progeny	Number of heterozygote carrier progeny

## Sheet: TableS1
TableS1: Haplotypes exhibiting missing or depleted homozygosity in WA line.
Chr	Start	Stop	Haplotype	Haplotype_length	#Haplotypes_in_window	Frequencies_haplotypes_in_window	Haplotype_count	#Homozygous	Haplotype_frequency	#Sires	#Dams	Homozygotes_expected_(frequency)	Homozygotes_expected_(pedigree)	#Pedigree_carrier_matings	Excact_binomial_test	Genes_in_window	Phenotypes	#Carrier_progeny	#Heterozygote_progeny
Chr8	20000000	20500000	000110111000111011	18	15	0.493,0.117,0.052,0.048,0.029,0.024,0.017,0.013,0.012,0.012,0.01,0.009,0.007,0.006,0.006	151	0	0.017	19	28	0.65	9	10	5.3494e-05	PTPRF,ENSGALG00000041647,ENSGALG00000010074,ST3GAL3,B4GALT2,ENSGALG00000046625,ARTN,IPO13,DPH2,ATP6V0B,SLC6A9,ENSGALG00000010101,DMAP1	DPH2[lethal]:preweaning-lethality;preweaning-lethality,-complete-penetrance,SLC6A9[lethal]:neonatal-lethality,-complete-penetrance;prenatal-lethality,-complete-penetrance;preweaning-lethality,-complete-penetrance;postnatal-lethality,-incomplete-penetrance,DMAP1[lethal]:embryonic-lethality-before-implantation,-complete-penetrance;preweaning-lethality,-complete-penetrance	36	24
Chr6	29500000	30500000	0000001111000000	16	20	0.259,0.102,0.065,0.058,0.051,0.041,0.035,0.021,0.019,0.019,0.018,0.012,0.011,0.01,0.009,0.009,0.009,0.006,0.006,0.006	347	0	0.041	45	44	3.52	5.25	11	0.00406549	RAB11FIP2,FAM204A,ENSGALG00000020656,CACUL1,NANOS1,ENSGALG00000041242,ENSGALG00000009328,FAM45A,SFXN4,PRDX3,GRK5,RGS10,TIAL1,BAG3,INPP5F,MCMBP,SEC23IP	RGS10[lethal]:postnatal-lethality,-complete-penetrance,TIAL1[lethal]:postnatal-lethality,-incomplete-penetrance;prenatal-lethality,-incomplete-penetrance;prenatal-lethality,-complete-penetrance,BAG3[lethal]:postnatal-lethality;postnatal-lethality,-complete-penetrance;preweaning-lethality,-complete-penetrance	21	9
Chr4	85500000	86000000	001001101	9	13	0.338,0.263,0.068,0.064,0.06,0.037,0.025,0.015,0.015,0.013,0.012,0.006,0.005	314	0	0.037	26	43	2.87	5	7	0.00711335	RNF212,FGFRL1,ATOH8,SIAT9	FGFRL1[lethal]:neonatal-lethality,-complete-penetrance;lethality-throughout-fetal-growth-and-development,-incomplete-penetrance,ATOH8[lethal]:embryonic-lethality-between-implantation-and-somite-formation,-complete-penetrance;lethality-during-fetal-growth-through-weaning,-incomplete-penetrance	20	10
Chr22	2250000	2750000	000000101110	12	18	0.484,0.102,0.056,0.046,0.036,0.03,0.023,0.018,0.017,0.015,0.014,0.011,0.011,0.011,0.011,0.008,0.005,0.005	97	0	0.011	14	19	0.27	6.75	6	0.000585219	ENSGALG00000003129,ENSGALG00000003142,ENSGALG00000044214,ADRB3,EIF4EBP1,ENSGALG00000003209,ASH2L,STAR,LSM1,BAG4,DDHD2,PLPP5,WHSC1L1,LETM2,FGFR1,TACC1,PLEKHA2,TM2D2,ADAM9,ENSGALG00000044168,ENSGALG00000044866,ENSGALG00000024085,C8orf4,ZMAT4,SFRP1,GOLGA7,ENSGALG00000045374,ENSGALG00000003492,GPAT4,ENSGALG00000018503,ANK1,KAT6A,AP3M2,PLAT	EIF4EBP1[lethal]:postnatal-lethality,-incomplete-penetrance,ASH2L[lethal]:embryonic-lethality-between-somite-formation-and-embryo-turning,-complete-penetrance,STAR[lethal]:postnatal-lethality,-incomplete-penetrance;neonatal-lethality,-incomplete-penetrance,LSM1[lethal]:preweaning-lethality,-incomplete-penetrance,WHSC1L1[lethal]:preweaning-lethality,-incomplete-penetrance,FGFR1[lethal]:embryonic-l…	27	21
Chr23	2500000	3500000	111111100000000000000101101101100000000111111001011100010000000	63	28	0.064,0.063,0.059,0.05,0.023,0.021,0.019,0.015,0.014,0.014,0.013,0.012,0.012,0.011,0.011,0.01,0.01,0.01,0.01,0.01,0.009,0.009,0.007,0.006,0.006,0.005,0.005,0.005	66	0	0.009	6	14	0.14	5	9	0.00711335	CLIC4,SRRM1,NCMAP,ENSGALG00000001310,ENSGALG00000034756,EPB41,TMEM200B,ENSGALG00000029653,ENSGALG00000037539,MECR,PTPRU,FAM110D,PDIK1L,TRIM63,SLC30A2,EXTL1,PAFAH2,ENSGALG00000001475,PAQR7,GJA9,ENSGALG00000024295,RRAGC,UTP11,FHL3	EPB41[lethal]:preweaning-lethality,-incomplete-penetrance,MECR[lethal]:embryonic-lethality;preweaning-lethality	20	13
Chr28	1000000	1500000	1100000001111101	16	23	0.13,0.129,0.074,0.053,0.039,0.038,0.036,0.032,0.031,0.025,0.02,0.018,0.017,0.015,0.009,0.008,0.008,0.007,0.006,0.006,0.006,0.005,0.005	266	0	0.031	32	41	2.05	7.5	15	0.000394276	PIPKIgamma87,CACTIN,TBXA2R,GIPC3,HMG20B,MFSD12,FZR1,ENSGALG00000039733,ENSGALG00000022149,DOHH,cNFI-C,UNC13A,MYO5B,ENSGALG00000026834,ENSGALG00000042275,ENSGALG00000033971,ENSGALG00000032724,ENSGALG00000029503,GNA11,ENSGALG00000044661,S1PR4,NCLN,ENSGALG00000027147,CELF5,HSD11B1L,C19orf70,ENSGALG00000013365,ENSGALG00000001948,MPND,ENSGALG00000032938,CCDC94,ZBTB7A,PIAS4,EEF2,DAPK3,NMRK2,ATCAY	FZR1[lethal]:embryonic-lethality-during-organogenesis,-complete-penetrance;embryonic-lethality;preweaning-lethality,-complete-penetrance,DOHH[lethal]:embryonic-lethality-prior-to-organogenesis,UNC13A[lethal]:neonatal-lethality,-complete-penetrance;postnatal-lethality,-complete-penetrance,MYO5B[lethal]:perinatal-lethality,-complete-penetrance,GNA11[lethal]:embryonic-lethality-during-organogenesis,…	30	15
Chr26	1500000	2500000	0011100001100010100000000000000000000001110111100000000011	58	28	0.065,0.062,0.049,0.047,0.033,0.027,0.026,0.022,0.014,0.014,0.012,0.011,0.01,0.009,0.008,0.008,0.008,0.008,0.007,0.006,0.006,0.006,0.006,0.006,0.005,0.005,0.005,0.005	173	0	0.022	15	32	0.94	6	10	0.00152648	ENSGALG00000000477,ENSGALG00000000483,ENSGALG00000000497,ENSGALG00000000504,KCTD20,STK38,ENSGALG00000028346,SRSF3,CDKN1A,RAB44,C6orf89,ENSGALG00000000560,MTCH1,SNRPE,SOX13,ETNK2,REN,PLEKHA6,PPP1R15B,PIK3C2B,MDM4,LRRN2,NFASC,CNTN2,TMEM81,RBBP5,DSTYK,TMCC2,NUAK2,KLHDC8A,ENSGALG00000044191,CDK18,MFSD4A,ENSGALG00000042137,ENSGALG00000046455,SLC45A3,NUCKS1,RAB29,SLC41A1,PM20D1,SLC26A9,RAB7B,CTSE,AVPR1…	SRSF3[lethal]:embryonic-lethality-before-implantation,-complete-penetrance;postnatal-lethality,-incomplete-penetrance;perinatal-lethality,-incomplete-penetrance,CDKN1A[lethal]:postnatal-lethality;perinatal-lethality,-complete-penetrance;lethality-throughout-fetal-growth-and-development,-incomplete-penetrance;embryonic-lethality,-complete-penetrance;lethality-throughout-fetal-growth-and-developmen…	24	11
Chr4	8500000	9000000	00000011	8	5	0.813,0.079,0.037,0.007,0.006	322	0	0.037	51	65	3.01	5	8	0.00711335	DACH2,CHM,POF1B,ENSGALG00000006929,APOOL,ENSGALG00000007028,HDX	CHM[lethal]:prenatal-lethality,-complete-penetrance;embryonic-lethality-during-organogenesis,-complete-penetrance;prenatal-lethality,-incomplete-penetrance	20	13
Chr8	1750000	2250000	100011111111111111	18	4	0.921,0.025,0.015,0.006	221	0	0.025	11	21	1.39	5	5	0.00711335	PTPRC,ATP6V1G3,NEK7,ENSGALG00000027212	PTPRC[lethal]:lethality-at-weaning,-incomplete-penetrance,NEK7[lethal]:postnatal-lethality,-incomplete-penetrance;perinatal-lethality,-incomplete-penetrance;preweaning-lethality,-complete-penetrance;embryonic-lethality-during-organogenesis,-incomplete-penetrance;lethality-throughout-fetal-growth-and-development,-incomplete-penetrance	20	15

## Sheet: TableS2
TableS2: Haplotypes exhibiting missing or depleted homozygosity in CB lines.
Chr	Start	Stop	Haplotype	Haplotype_length	#Haplotypes_in_window	Frequencies_haplotypes_in_window	Haplotype_count	#Homozygous	Haplotype_frequency	#Sires	#Dams	Homozygotes_expected_(frequency)	Homozygotes_expected_(pedigree)	#Carrier_matings	#Pedigree_carrier_matings	Excact_binomial_test	Genes_in_window	Phenotypes	#Carrier_progeny	#Heterozygote_progeny
Chr2	56000000	56500000	010100001000100000100	21	17	0.15,0.111,0.099,0.09,0.08,0.06,0.04,0.038,0.029,0.021,0.013,0.012,0.012,0.011,0.007,0.006,0.005	685	0	0.06	31	223	10.21	12.5	25	25	1.28612e-06	COL15A1,ChALK5,RECK,ADNP2,RBFA,ENSGALG00000037156,ENSGALG00000039617,ENSGALG00000045628,ENSGALG00000045175,ENSGALG00000045357,ENSGALG00000046360,ENSGALG00000040739,HSBP1L1,ENSGALG00000043150,ENSGALG00000045051,KCNG2	RECK[lethal]:embryonic-lethality-during-organogenesis,-complete-penetrance;lethality-throughout-fetal-growth-and-development,-complete-penetrance	50	42
Chr3	94125000	94875000	1101010000000000000000001110111	31	8	0.361,0.306,0.126,0.047,0.034,0.032,0.012,0.01	539	0	0.047	11	287	6.32	21.75	37	37	2.02513e-11	COLEC11	-	87	45
Chr5	5500000	6000000	00111011	8	12	0.183,0.159,0.141,0.116,0.107,0.091,0.07,0.02,0.019,0.017,0.008,0.008	2103	3	0.183	89	700	96.24	72.5	135	139	9.30461e-37	WT1,ENSGALG00000012109,CCDC73,PRRG4,QSER1,ENSGALG00000044298,ENSGALG00000022206	WT1[lethal]:lethality-throughout-fetal-growth-and-development,-complete-penetrance;perinatal-lethality,-complete-penetrance;prenatal-lethality,-incomplete-penetrance;neonatal-lethality,-complete-penetrance;prenatal-lethality;embryonic-lethality,-complete-penetrance;embryonic-lethality-during-organogenesis,-incomplete-penetrance	288	213
Chr5	30500000	31000000	000000000000000	15	12	0.279,0.19,0.127,0.093,0.088,0.077,0.017,0.017,0.014,0.013,0.008,0.007	885	2	0.077	37	231	17.04	29.25	48	51	2.70783e-15	FMN1,GREM1,SCG5,ENSGALG00000009731,RASGRP1,FAM98B,SPRED1	FMN1[lethal]:perinatal-lethality,-incomplete-penetrance,GREM1[lethal]:neonatal-lethality,-complete-penetrance;postnatal-lethality,-complete-penetrance,SCG5[lethal]:postnatal-lethality,-incomplete-penetrance	97	58
Chr1	180250000	180750000	000000000100100111001	21	17	0.157,0.155,0.131,0.117,0.08,0.059,0.047,0.043,0.015,0.011,0.01,0.01,0.009,0.007,0.007,0.005,0.005	1349	0	0.117	91	189	39.6	53	88	88	4.5637e-27	KDELC2,ATM,NPAT,ACAT1,CUL5,RAB39A,SLC35F2,SLN,ELMOD1,ALKBH8,CWF19L2	ATM[lethal]:embryonic-lethality,-complete-penetrance;neonatal-lethality,-complete-penetrance;perinatal-lethality;embryonic-lethality-during-organogenesis,-complete-penetrance;embryonic-lethality-between-implantation-and-somite-formation,-incomplete-penetrance;lethality,-incomplete-penetrance,NPAT[lethal]:preweaning-lethality,-complete-penetrance,CUL5[lethal]:preweaning-lethality,-complete-penetra…	212	181
Chr14	8250000	8750000	0000000000000000000100000000000000000	37	8	0.412,0.17,0.084,0.07,0.059,0.02,0.02,0.01	800	3	0.07	18	239	13.92	19.25	33	33	1.27106e-07	RPS15A,ENSGALG00000006780,SMG1,CLEC19A,SYT17,ITPRIPL2,COQ7,TMC7,TMC5,GDE1,CCP110,C16orf52,ENSGALG00000039154,ENSGALG00000030887,ENSGALG00000042597,ENSGALG00000026817,ENSGALG00000006964,ENSGALG00000006982,POLR3E,CDR2	SMG1[lethal]:embryonic-lethality-between-implantation-and-placentation,-complete-penetrance;embryonic-lethality-during-organogenesis,-complete-penetrance,COQ7[lethal]:embryonic-lethality-during-organogenesis,-complete-penetrance;preweaning-lethality,-complete-penetrance	77	39
Chr9	6000000	6500000	00000001011001100010010	23	13	0.191,0.137,0.136,0.085,0.081,0.066,0.048,0.036,0.026,0.017,0.013,0.01,0.007	303	0	0.026	14	83	2	6.75	10	10	0.000585219	CLSTN2,TRIM42	-	27	13

## Sheet: TableS3
TableS3: Haplotypes exhibiting missing or depleted homozygosity in W1 line.
Chr	Start	Stop	Haplotype	Haplotype_length	#Haplotypes_in_window	Frequencies_haplotypes_in_window	Haplotype_count	#Homozygous	Haplotype_frequency	#Sires	#Dams	Homozygotes_expected_(frequency)	Homozygotes_expected_(pedigree)	#Carrier_matings	#Pedigree_carrier_matings	Excact_binomial_test	Genes_in_window	Phenotypes	#Carrier_progeny	#Heterozygote_progeny
Chr1	118000000	118500000	0000001010011110111	19	12	0.544,0.101,0.075,0.05,0.022,0.018,0.018,0.017,0.011,0.011,0.006,0.006	316	0	0.05	69	35	3.96	9.25	7	19	3.28595e-05	POLA1,SCARNA24,ENSGALG00000016318,ENSGALG00000042121,PDK3,ENSGALG00000016326,ENSGALG00000016327,ENSGALG00000016340,KLHL15,SAT1,ACOT9,PRDX4,PTCHD1	-	37	19
Chr1	158750000	159250000	111111111	9	7	0.706,0.122,0.093,0.019,0.007,0.006,0.006	121	0	0.019	32	8	0.58	5	1	3	0.00711335	PCDH9	-	20	18
Chr12	9500000	10500000	0000000000000011111000000110110100000000011000110100	52	13	0.254,0.243,0.078,0.031,0.021,0.018,0.015,0.009,0.009,0.008,0.008,0.007,0.007	204	0	0.031	46	16	1.59	5.75	3	11	0.00258097	EEFSEC,RUVBL1,SEC61A1,KBTBD12,MGLL,ABTB1,PODXL2,MCM2,TPRA1,CHCHD6,PLXNA1,ENSGALG00000045032,TXNRD3,ENSGALG00000045577,CHST13,SLC41A3	RUVBL1[lethal]:embryonic-lethality-before-implantation,-complete-penetrance,MCM2[lethal]:postnatal-lethality;postnatal-lethality,-incomplete-penetrance;prenatal-lethality,-complete-penetrance	23	10
Chr14	13500000	14500000	1011000000010000000000000001111111	34	20	0.142,0.131,0.097,0.054,0.045,0.037,0.033,0.032,0.028,0.021,0.02,0.02,0.015,0.015,0.014,0.012,0.011,0.009,0.005,0.005	202	0	0.032	24	20	1.6	5.5	2	7	0.0024843	CAPN15,ENSGALG00000001994,ENSGALG00000045317,PIGQ,RAB40C,WFIKKN1,ABCA3,HN1L,ENSGALG00000009341,IFT140,TMEM204,TELO2,RNPS1,ENSGALG00000045671,ENSGALG00000041181,ENSGALG00000009234,ATP6V0C,ENSGALG00000009217,NTN3,ENSGALG00000039817,ENSGALG00000009205,ENSGALG00000046398,ENSGALG00000038715,CCNF,ENSGALG00000035029,ENSGALG00000001792,GLYR1,ROGDI,MCHR2,ENSGALG00000029827,ACSM5,PDILT	RAB40C[lethal]:preweaning-lethality,-incomplete-penetrance,ABCA3[lethal]:neonatal-lethality,-complete-penetrance;prenatal-lethality,-incomplete-penetrance,IFT140[lethal]:embryonic-lethality,-complete-penetrance;lethality-throughout-fetal-growth-and-development,-complete-penetrance;lethality-throughout-fetal-growth-and-development,-incomplete-penetrance;embryonic-lethality;preweaning-lethality;emb…	22	14
Chr17	8250000	8750000	000000000000000000000000000000001111011	39	13	0.556,0.076,0.05,0.033,0.024,0.022,0.019,0.013,0.008,0.008,0.007,0.007,0.006	148	0	0.022	32	9	0.82	6	2	6	0.00152648	NOTCH1,ENSGALG00000002364,INPP5E,PMPCA,ENSGALG00000001921,SNAPC4,CARD9,GPSM1,ENSGALG00000001762,QSOX2,LHX3,C9orf69,NACC2,UBAC1,CAMSAP1,KCNT1,ENSGALG00000041608	NOTCH1[lethal]:embryonic-lethality-during-organogenesis,-complete-penetrance;embryonic-lethality,-complete-penetrance;embryonic-lethality;embryonic-lethality-during-organogenesis;perinatal-lethality,-complete-penetrance;neonatal-lethality,-complete-penetrance;preweaning-lethality,-complete-penetrance,INPP5E[lethal]:neonatal-lethality,-complete-penetrance;embryonic-lethality-during-organogenesis,-…	24	13
Chr19	1000000	1500000	11011010000000000110000010111001101111001111	44	18	0.158,0.131,0.115,0.062,0.062,0.049,0.027,0.025,0.019,0.016,0.014,0.013,0.013,0.013,0.012,0.007,0.007,0.006	390	0	0.062	86	34	6.03	10.5	9	22	7.81633e-06	CALN1,WBSCR17,AUTS2	-	42	21
Chr2	88750000	89250000	100100000111100100	18	11	0.393,0.16,0.098,0.062,0.059,0.056,0.023,0.017,0.006,0.006,0.005	400	4	0.059	71	29	5.95	13.75	9	29	1.74281e-07	CTNNAL1,FAM206A,ENSGALG00000013209,ENSGALG00000013212,MURC,ENSGALG00000013268,EXOC3,PDCD6	-	55	28
Chr28	1750000	2250000	110010111110111010100101111001100000101110000111	48	11	0.298,0.137,0.092,0.044,0.036,0.035,0.031,0.023,0.013,0.012,0.011	192	0	0.031	39	24	1.47	6.25	2	6	0.00166837	MYO1F,ADAMTS10,ZAP70,ENSGALG00000033094,ENSGALG00000001440,ENSGALG00000000803,LINGO3,OAZ1,ENSGALG00000043925,AMH,SF3A2,ENSGALG00000000835,ENSGALG00000044291,DOT1L,AP3D1,MOB3A,ENSGALG00000044112,MKNK2,BTBD2,ENSGALG00000045954,CSNK1G2,SCAMP4,ENSGALG00000001035,ENSGALG00000014589,ABHD17A,REXO1	DOT1L[lethal]:prenatal-lethality,-complete-penetrance;embryonic-lethality-during-organogenesis,-complete-penetrance;postnatal-lethality,-incomplete-penetrance;preweaning-lethality;preweaning-lethality,-complete-penetrance,AP3D1[lethal]:postnatal-lethality;postnatal-lethality,-incomplete-penetrance	25	16
Chr28	2500000	3500000	10100000000000000000100000000000000000000000000100001001011110011001	68	26	0.071,0.066,0.053,0.041,0.036,0.029,0.025,0.024,0.018,0.017,0.016,0.012,0.011,0.009,0.009,0.007,0.007,0.007,0.007,0.006,0.006,0.006,0.006,0.005,0.005,0.005	447	3	0.071	60	36	7.95	20.25	10	27	4.6844e-07	SH3GL1,CHAF1A,UBXN6,ENSGALG00000027068,ENSGALG00000021972,LRG1,Sema6B,ANKRD24,SIRT6,CREB3L3,ENSGALG00000001267,C2CD4C,SHC2,ENSGALG00000001317,ENSGALG00000028341,TPGS1,CDC34,BSG,HCN2,POLRMT,FGF22,RNF126,FSTL3,PRSS57,PALM,PTBP1,PLPPR3,ENSGALG00000040832,MED16,R3HDM4,ARID3A,WDR18,GRIN3B,TMEM259,ABCA7,CNN2,HMHA1,POLR2E,ENSGALG00000002595,SBNO2,STK11,ATP5D,MIDN,CIRBP,C19orf24,EFNA2,ENSGALG00000015203,…	SH3GL1[lethal]:neonatal-lethality,-incomplete-penetrance;neonatal-lethality,-complete-penetrance,CHAF1A[lethal]:embryonic-lethality-before-implantation,-incomplete-penetrance,SIRT6[lethal]:lethality-at-weaning,-complete-penetrance,CDC34[lethal]:preweaning-lethality,-incomplete-penetrance,BSG[lethal]:postnatal-lethality,-incomplete-penetrance;embryonic-lethality-at-implantation,-incomplete-penetra…	81	33
Chr3	101500000	102000000	00000001001000001	17	11	0.37,0.178,0.137,0.051,0.044,0.043,0.035,0.014,0.007,0.006,0.006	299	0	0.043	38	21	3.19	5	1	6	0.00711335	ENSGALG00000016475,TTC32,ENSGALG00000016477,ENSGALG00000038544,ENSGALG00000016479,MATN3	-	20	14
Chr6	16500000	17500000	0001000000000000000001000	25	17	0.219,0.211,0.146,0.098,0.054,0.045,0.034,0.019,0.017,0.011,0.009,0.009,0.006,0.006,0.006,0.005,0.005	60	0	0.009	12	7	0.14	5	1	3	0.00711335	HELLS,ENSGALG00000020899,ZP4,ENSGALG00000023925,TLL2,TM9SF3,PIK3AP1,NOLC1,ENSGALG00000005599,ENSGALG00000025772,PITX3,GBF1,TMEM150A,NFKB2,PSD,FBXL15,CUEDC2,Pax-2,ENSGALG00000045220,HIF1AN,ENSGALG00000005704,ENSGALG00000005722,WNT8B,SCD	HELLS[lethal]:neonatal-lethality,-complete-penetrance;postnatal-lethality,-incomplete-penetrance;perinatal-lethality,-incomplete-penetrance;preweaning-lethality,-complete-penetrance,GBF1[lethal]:embryonic-lethality;preweaning-lethality;preweaning-lethality,-complete-penetrance,NFKB2[lethal]:postnatal-lethality,-complete-penetrance	20	10
Chr8	6500000	7500000	1110010000001111000110110000000000	34	17	0.226,0.199,0.144,0.041,0.036,0.029,0.025,0.018,0.015,0.007,0.007,0.006,0.006,0.006,0.006,0.005,0.005	241	0	0.036	61	20	2.14	7	3	8	0.000607603	RASAL2,ENSGALG00000004341,SEC16B,RNaseP_nuc,BRINP2,ASTN1,ENSGALG00000040432,RFWD2,SCARNA3,TNR,KIAA0040,TNN,MRPS14,CACYBP,RABGAP1L,RC3H1,SERPINC1,ZBTB37,ENSGALG00000004607,NPL,LAMC1	RFWD2[lethal]:embryonic-lethality-during-organogenesis,-complete-penetrance;lethality-throughout-fetal-growth-and-development,-incomplete-penetrance,RC3H1[lethal]:neonatal-lethality,-complete-penetrance;preweaning-lethality,-incomplete-penetrance;perinatal-lethality,-complete-penetrance,SERPINC1[lethal]:lethality-throughout-fetal-growth-and-development,-complete-penetrance;preweaning-lethality,-c…	28	15
Chr9	1500000	2500000	11100100101001111111100000	26	20	0.09,0.09,0.088,0.068,0.059,0.055,0.049,0.036,0.036,0.035,0.025,0.021,0.02,0.016,0.013,0.012,0.01,0.009,0.006,0.006	240	0	0.035	32	22	2.07	6.5	5	14	0.00095425	UGGT1,ENSGALG00000002155,PLEKHB2,FAM168B,ARHGEF4	-	26	6

## Sheet: TableS4
TableS4: Haplotypes exhibiting missing or depleted homozygosity in B1-B2 line.
Chr	Start	Stop	Haplotype	Haplotype_length	#Haplotypes_in_window	Frequencies_haplotypes_in_window	Haplotype_count	#Homozygous	Haplotype_frequency	#Sires	#Dams	Homozygotes_expected_(simple)	Homozygotes_expected_(pedigree)	#Carrier_matings	#Pedigree_carrier_matings	Excact_binomial_test	Genes_in_window	Phenotypes	#Carrier_progeny	#Heterozygote_progeny
Chr5	9000000	9500000	10100000000000000000	20	26	0.166,0.141,0.141,0.068,0.032,0.028,0.028,0.025,0.022,0.014,0.014,0.014,0.012,0.012,0.01,0.009,0.009,0.009,0.008,0.008,0.007,0.006,0.006,0.005,0.005,0.005	113	0	0.008	8	11	0.24	6.5	2	4	0.00095425	TMEM9B,C11orf16,ENSGALG00000020510,ST5,RPL27A,TRIM66	RPL27A[lethal]:embryonic-lethality,-complete-penetrance;postnatal-lethality,-incomplete-penetrance	26	7
Chr1	30750000	31250000	000000000000001110	18	6	0.815,0.058,0.044,0.02,0.017,0.007	227	0	0.017	15	13	0.96	7.25	4	8	0.000359957	ARID2,SCAF11,SLC38A1,SLC38A2,SLC38A4,AMIGO2	ARID2[lethal]:preweaning-lethality;embryonic-lethality-during-organogenesis,-complete-penetrance,SLC38A2[lethal]:preweaning-lethality,-incomplete-penetrance	29	17
Chr1	124000000	124500000	10001011101111100010	20	14	0.393,0.117,0.099,0.055,0.037,0.023,0.021,0.015,0.015,0.013,0.012,0.007,0.006,0.005	208	0	0.015	8	31	0.8	6.5	3	7	0.00095425	MID1,CLCN4,WWC3,SHROOM2	-	26	15
Chr2	125750000	126250000	0000001000001000101010	22	25	0.208,0.129,0.032,0.029,0.026,0.025,0.024,0.023,0.021,0.02,0.014,0.012,0.011,0.01,0.009,0.009,0.009,0.008,0.007,0.007,0.006,0.006,0.006,0.006,0.005	163	0	0.012	12	16	0.49	9.25	3	5	3.28595e-05	CDH17,GEM,RAD54B,FSBP,RNF151,KIAA1429,ESRP1,DPY19L4,ENSGALG00000015980,INTS8,CCNE2,TP53INP1,NDUFAF6,PLEKHF2	ESRP1[lethal]:neonatal-lethality,-complete-penetrance;postnatal-lethality,-complete-penetrance	37	10
Chr6	5750000	6250000	00011110000011011010101110	26	17	0.261,0.188,0.087,0.066,0.042,0.026,0.02,0.015,0.014,0.012,0.011,0.009,0.007,0.006,0.006,0.005,0.005	201	0	0.015	15	18	0.75	6.75	2	4	0.000585219	PCDH15,SIRT1,DNAJC12,CTNNA3,LRRTM3	SIRT1[lethal]:postnatal-lethality,-incomplete-penetrance;perinatal-lethality,-incomplete-penetrance;postnatal-lethality;neonatal-lethality,-incomplete-penetrance;postnatal-lethality,-complete-penetrance;embryonic-lethality-during-organogenesis,-incomplete-penetrance;lethality-throughout-fetal-growth-and-development,-incomplete-penetrance;embryonic-lethality,-incomplete-penetrance;preweaning-letha…	27	14
Chr12	16000000	16500000	1101110111111110001101110110110	31	16	0.169,0.137,0.074,0.064,0.054,0.054,0.039,0.024,0.024,0.022,0.013,0.012,0.009,0.009,0.008,0.007	178	0	0.013	10	20	0.59	7.5	3	7	0.000394276	FOXP1,EIF4E3,ENSGALG00000022635,GPR27,PROK2,RYBP,SHQ1,GXYLT2	FOXP1[lethal]:lethality-throughout-fetal-growth-and-development,-incomplete-penetrance;lethality-throughout-fetal-growth-and-development,-complete-penetrance;prenatal-lethality,-incomplete-penetrance;neonatal-lethality,-complete-penetrance;embryonic-lethality,-complete-penetrance;perinatal-lethality,-complete-penetrance,RYBP[lethal]:embryonic-lethality-between-implantation-and-somite-formation,-c…	30	15
Chr6	19750000	20250000	111011011001111100000000	24	12	0.284,0.163,0.16,0.121,0.083,0.021,0.019,0.011,0.01,0.007,0.005,0.005	254	0	0.019	18	31	1.2	12	5	13	1.95676e-06	PLCE1,SLC35G1,LGI1,FRA10AC1,PDE6C,RBP4,FFAR4,CEP55,MYOF,CYP26A1,CYP26C1,EXOC6	LGI1[lethal]:postnatal-lethality,-complete-penetrance,CYP26A1[lethal]:perinatal-lethality,-complete-penetrance;prenatal-lethality,-incomplete-penetrance;prenatal-lethality,-complete-penetrance;embryonic-lethality-during-organogenesis,-complete-penetrance,EXOC6[lethal]:preweaning-lethality,-incomplete-penetrance	48	28
Chr7	22500000	23000000	0001110110011100100	19	12	0.374,0.306,0.067,0.031,0.029,0.02,0.016,0.01,0.006,0.005,0.005,0.005	420	0	0.031	47	30	3.27	8	7	20	0.00013846	IGFBP5,IGFBP2,RPL37A,SMARCAL1,MARCH4,XRCC5	XRCC5[lethal]:postnatal-lethality,-incomplete-penetrance;prenatal-lethality,-incomplete-penetrance	32	9
Chr9	17250000	17750000	00100000000000000	17	14	0.633,0.12,0.05,0.03,0.023,0.015,0.011,0.01,0.009,0.008,0.007,0.006,0.005,0.005	400	0	0.03	33	41	2.97	11.25	8	17	5.35508e-06	TBL1XR1	-	45	18
Chr27	1500000	2000000	0000011110101111111111011110101100110101010000000100000010110	61	21	0.087,0.075,0.04,0.037,0.03,0.026,0.024,0.017,0.016,0.014,0.014,0.012,0.011,0.009,0.009,0.007,0.007,0.007,0.006,0.006,0.005	192	0	0.014	19	17	0.68	10	3	9	2.23611e-05	MYO1D,PSMD11,FZD2,GPATCH8,ARHGAP27,PLEKHM1,ENSGALG00000000239,RDM1,GH1,CD79B,SCN4A,ENSGALG00000000274,ENSGALG00000000287,ENSGALG00000000293,FTSJ3,PSMC5,SMARCD2,ASIC2	FZD2[lethal]:neonatal-lethality,-incomplete-penetrance;embryonic-lethality-during-organogenesis,-complete-penetrance;postnatal-lethality,-incomplete-penetrance;preweaning-lethality,-complete-penetrance,SCN4A[lethal]:perinatal-lethality,-incomplete-penetrance;perinatal-lethality,-complete-penetrance;preweaning-lethality,-complete-penetrance,SMARCD2[lethal]:preweaning-lethality,-incomplete-penetran…	40	16
Chr28	1000000	1500000	0001010000000000000000000010000000	34	18	0.13,0.086,0.083,0.062,0.046,0.024,0.022,0.021,0.018,0.016,0.015,0.014,0.012,0.009,0.009,0.008,0.008,0.006	298	0	0.022	16	19	1.65	7.5	2	3	0.000394276	TJP3,PIP5K1C,CACTIN,TBXA2R,GIPC3,HMG20B,MFSD12,CDH1-A,ENSGALG00000022149,DOHH,UNC13A,MYO5B,PLPP2,AES,GNA11,ENSGALG00000013378,S1PR4,NCLN,ENSGALG00000027147,CELF5,HSD11B1L,C19orf70,ENSGALG00000013365,ENSGALG00000001948,MPND,ZBTB7A,PIAS4,EEF2,DAPK3,NMRK2,ATCAY,ENSGALG00000001806	PIP5K1C[lethal]:neonatal-lethality,-complete-penetrance;embryonic-lethality-during-organogenesis,-complete-penetrance;preweaning-lethality;preweaning-lethality,-complete-penetrance,DOHH[lethal]:embryonic-lethality-prior-to-organogenesis,UNC13A[lethal]:neonatal-lethality,-complete-penetrance;postnatal-lethality,-complete-penetrance,MYO5B[lethal]:perinatal-lethality,-complete-penetrance,GNA11[letha…	30	12
Chr2	47750000	48250000	00110101000001101110	20	16	0.32,0.158,0.087,0.061,0.028,0.025,0.022,0.02,0.018,0.018,0.015,0.014,0.013,0.012,0.008,0.005	298	0	0.022	30	29	1.65	7	7	17	0.000607603	TBX20,ENSGALG00000012158,NPSR1,FANCD2OS,BMPER	TBX20[lethal]:embryonic-lethality-during-organogenesis,-complete-penetrance;lethality-throughout-fetal-growth-and-development,-complete-penetrance,BMPER[lethal]:neonatal-lethality,-complete-penetrance;prenatal-lethality,-incomplete-penetrance	28	8
Chr2	28250000	28750000	0001101101111	13	9	0.738,0.116,0.025,0.021,0.018,0.008,0.007,0.006,0.006	333	0	0.025	16	22	2.06	12	6	12	1.95676e-06	ISPD,LRRC72,SOSTDC1,ANKMY2,BZW2,TSPAN13,AGR2,AGR3	ISPD[lethal]:neonatal-lethality,-complete-penetrance,SOSTDC1[lethal]:neonatal-lethality,-incomplete-penetrance;preweaning-lethality,-incomplete-penetrance	48	23
Chr26	3750000	4250000	1110100001110111000000000000000000000000111001110001000	55	21	0.28,0.075,0.055,0.042,0.033,0.033,0.028,0.023,0.021,0.019,0.012,0.012,0.012,0.01,0.01,0.008,0.007,0.007,0.007,0.006,0.005	166	0	0.012	12	19	0.51	6.75	2	5	0.000585219	SYT6,TRIM33,BCAS2,DENND2C,AMPD1,N-RAS,CSDE1,SIKE1,ENSGALG00000002170,SYCP1,TSHB,TSPAN2,NGF,FANCE,ENSGALG00000025718,PPARD,DEF6,ZNF76,RPL10A,SCUBE3,ENSGALG00000002692,ANKS1A,TAF11,UHRF1BP1,SNRPC	TRIM33[lethal]:embryonic-lethality-between-somite-formation-and-embryo-turning,-complete-penetrance;embryonic-lethality,-incomplete-penetrance;embryonic-lethality-between-implantation-and-somite-formation,-complete-penetrance,AMPD1[lethal]:preweaning-lethality,-incomplete-penetrance,NGF[lethal]:postnatal-lethality,-incomplete-penetrance,PPARD[lethal]:prenatal-lethality;prenatal-lethality,-incompl…	27	9
Chr1	22000000	22500000	00111111110110000000	20	12	0.305,0.176,0.171,0.041,0.038,0.037,0.031,0.011,0.01,0.008,0.006,0.005	146	0	0.011	10	11	0.4	7.75	3	6	0.000225423	WASL,LMOD2,ASB15,NDUFA5,IQUB,ATP6AP1,SLC13A1,CADPS2	WASL[lethal]:embryonic-lethality-during-organogenesis,-complete-penetrance;prenatal-lethality,-complete-penetrance;postnatal-lethality,-complete-penetrance,LMOD2[lethal]:postnatal-lethality,-incomplete-penetrance,NDUFA5[lethal]:embryonic-lethality-during-organogenesis,-complete-penetrance,ATP6AP1[lethal]:prenatal-lethality,-complete-penetrance;perinatal-lethality	31	25
Chr2	137250000	137750000	010000000001	12	15	0.369,0.337,0.08,0.029,0.016,0.016,0.016,0.009,0.008,0.008,0.007,0.007,0.006,0.006,0.005	211	0	0.016	15	26	0.83	14.25	6	12	1.06255e-07	ZHX2,DERL1,TBC1D31,FAM83A,ENSGALG00000016380,ZHX1,ATAD2,WDYHV1,FBXO32,KLHL38,ANXA13,FAM91A1	DERL1[lethal]:embryonic-lethality,-complete-penetrance	57	29
Chr6	33500000	34000000	0000000011000010100	19	24	0.237,0.079,0.061,0.053,0.038,0.03,0.028,0.026,0.026,0.02,0.02,0.02,0.017,0.016,0.015,0.011,0.01,0.007,0.007,0.006,0.006,0.006,0.005,0.005	404	0	0.03	29	30	3.03	9	3	5	5.3494e-05	MGMT,EBF3,GLRX3	EBF3[lethal]:neonatal-lethality,-complete-penetrance,GLRX3[lethal]:embryonic-lethality-during-organogenesis,-complete-penetrance;lethality-throughout-fetal-growth-and-development,-complete-penetrance;embryonic-lethality-during-organogenesis,-incomplete-penetrance	36	10
Chr13	4000000	4500000	11010000000000000101000010000010000	35	22	0.316,0.083,0.063,0.051,0.038,0.036,0.032,0.027,0.019,0.017,0.016,0.015,0.014,0.014,0.009,0.008,0.008,0.008,0.006,0.006,0.006,0.005	107	0	0.008	8	10	0.21	8	2	4	0.00013846	SLIT3,PANK3,ENSGALG00000001874,RARS,WWC1,TENM2	RARS[lethal]:embryonic-lethality;preweaning-lethality	32	13
Chr10	6750000	7250000	10000000000	11	6	0.835,0.09,0.019,0.019,0.01,0.007	261	0	0.019	20	11	1.26	9.75	2	4	2.02631e-05	ENSGALG00000004283,CGNL1,TCF12,ENSGALG00000014375,MNS1,TEX9,RFX7	TCF12[lethal]:postnatal-lethality,-complete-penetrance;postnatal-lethality,-incomplete-penetrance,MNS1[lethal]:lethality,-incomplete-penetrance,RFX7[lethal]:preweaning-lethality,-incomplete-penetrance	39	18
Chr28	500000	1000000	000000011011101010000000001000011100111110010110001011101	57	22	0.079,0.06,0.058,0.058,0.039,0.037,0.024,0.019,0.019,0.018,0.017,0.015,0.012,0.011,0.01,0.009,0.009,0.007,0.006,0.005,0.005,0.005	74	0	0.005	5	8	0.1	6.75	3	6	0.000585219	TIMM44,HNRNPM,ENSGALG00000000406,ENSGALG00000000407,LSM7,SPPL2B,TMPRSS9,TIMM13,LMNB2,RPL36,LONP1,SLC1A6,RANBP3,ENSGALG00000026541,KLHL33,ENSGALG00000021692,ENSGALG00000021693,BTN1A1,MARCH2,RAB11B,ANGPTL4,KANK3,ENSGALG00000026845,RPS28,ENSGALG00000000629,CD320,ENSGALG00000026161,ADMP,ENSGALG00000026844,ENSGALG00000000722,ENSGALG00000024395,ELAVL1,MATK,ENSGALG00000028021,RAX2,ENSGALG00000027961,MRP…	LMNB2[lethal]:neonatal-lethality,-complete-penetrance;preweaning-lethality,LONP1[lethal]:embryonic-lethality-between-implantation-and-placentation,-incomplete-penetrance,ANGPTL4[lethal]:postnatal-lethality;prenatal-lethality,-incomplete-penetrance;lethality-throughout-fetal-growth-and-development,-incomplete-penetrance,ELAVL1[lethal]:lethality-throughout-fetal-growth-and-development,-complete-pen…	27	8
Chr10	12000000	12500000	0000000000010101100000000000001000	34	24	0.226,0.1,0.037,0.029,0.023,0.019,0.017,0.017,0.015,0.015,0.015,0.014,0.014,0.011,0.01,0.01,0.009,0.008,0.007,0.006,0.006,0.006,0.005,0.005	108	0	0.008	10	8	0.22	6.5	2	3	0.00095425	FAH,ZFAND6,BCL2A1,MTHFS,ENSGALG00000021157,DD1,PEX11A,PLIN1,KIF7,TICRR,RHCG,POLG,FANCI,RLBP1,ABHD2	FAH[lethal]:neonatal-lethality,-complete-penetrance;postnatal-lethality,-complete-penetrance,MTHFS[lethal]:embryonic-lethality,-complete-penetrance,PEX11A[lethal]:prenatal-lethality;perinatal-lethality,KIF7[lethal]:perinatal-lethality,-complete-penetrance;embryonic-lethality-during-organogenesis,-complete-penetrance;neonatal-lethality,-complete-penetrance,POLG[lethal]:embryonic-lethality-between-…	26	13
Chr4	24500000	25000000	0000001000000000000	19	15	0.489,0.101,0.074,0.068,0.029,0.023,0.022,0.02,0.012,0.01,0.007,0.006,0.006,0.005,0.005	69	0	0.005	1	3	0.09	8.75	2	4	9.36952e-05	PALLD,AADAT,ENSGALG00000009661,MFAP3L,C4orf27,CLCN3,NEK1,SH3RF1	PALLD[lethal]:lethality-throughout-fetal-growth-and-development,-complete-penetrance,CLCN3[lethal]:lethality-at-weaning,-incomplete-penetrance,NEK1[lethal]:postnatal-lethality;postnatal-lethality,-incomplete-penetrance	35	21
Chr2	30000000	30500000	00000000110111	14	8	0.81,0.066,0.024,0.012,0.01,0.01,0.009,0.005	324	0	0.024	16	21	1.95	7	4	8	0.000607603	MACC1,ITGB8,ENSGALG00000010901,ENSGALG00000019646	ITGB8[lethal]:postnatal-lethality,-complete-penetrance;embryonic-lethality-during-organogenesis,-incomplete-penetrance	28	13
Chr2	30250000	30750000	011011111011010	15	6	0.828,0.068,0.024,0.012,0.009,0.007	317	0	0.024	16	21	1.86	7	4	8	0.000607603	ENSGALG00000019646,SP4,ENSGALG00000010906,CDCA7L	SP4[lethal]:postnatal-lethality,-incomplete-penetrance;perinatal-lethality,-incomplete-penetrance	28	12
Chr5	23000000	23500000	000000	6	12	0.395,0.352,0.091,0.037,0.019,0.016,0.014,0.01,0.008,0.007,0.006,0.005	260	0	0.019	11	20	1.25	7.25	2	4	0.000359957	CREB3L1,PHF21A,GYLTL1B,ENSGALG00000020463,PEX16,MAPK8IP1,CRY2,SLC35C1,CHST1,ENSGALG00000023305,ENSGALG00000022531,ENSGALG00000008453	PHF21A[lethal]:neonatal-lethality,-complete-penetrance,MAPK8IP1[lethal]:embryonic-lethality-before-implantation,-complete-penetrance;postnatal-lethality,-complete-penetrance,SLC35C1[lethal]:lethality-at-weaning,-incomplete-penetrance;postnatal-lethality,-incomplete-penetrance;perinatal-lethality,-incomplete-penetrance	29	14
Chr2	30750000	31250000	01110111	8	9	0.756,0.067,0.033,0.02,0.018,0.017,0.015,0.011,0.008	242	0	0.018	11	24	1.09	7.75	4	8	0.000225423	RAPGEF5,ENSGALG00000010913,IL6,ENSGALG00000021835,FAM126A,KLHL7,NUPL2,ENSGALG00000027858,ENSGALG00000028414,ENSGALG00000003796	IL6[lethal]:preweaning-lethality,-incomplete-penetrance;preweaning-lethality,-complete-penetrance	31	9
Chr2	30500000	31000000	1101101001110	13	6	0.756,0.075,0.069,0.024,0.011,0.009	325	0	0.024	17	27	1.96	7.5	5	11	0.000394276	SP4,ENSGALG00000010906,CDCA7L,RAPGEF5,ENSGALG00000010913,IL6	SP4[lethal]:postnatal-lethality,-incomplete-penetrance;perinatal-lethality,-incomplete-penetrance,IL6[lethal]:preweaning-lethality,-incomplete-penetrance;preweaning-lethality,-complete-penetrance	30	13
Chr26	4000000	4500000	000000000000001110011100010000101010000000000000000000	54	22	0.095,0.082,0.066,0.047,0.04,0.037,0.034,0.032,0.029,0.023,0.013,0.012,0.01,0.009,0.009,0.008,0.007,0.007,0.006,0.006,0.006,0.005	128	0	0.009	7	16	0.3	6.75	2	5	0.000585219	FANCE,ENSGALG00000025718,PPARD,DEF6,ZNF76,RPL10A,SCUBE3,ENSGALG00000002692,ANKS1A,TAF11,UHRF1BP1,SNRPC,C26H6ORF106,SPDEF,PACSIN1,RPS10,NUDT3,ENSGALG00000025773,GRM4,7.	PPARD[lethal]:prenatal-lethality;prenatal-lethality,-incomplete-penetrance;embryonic-lethality-during-organogenesis,-incomplete-penetrance;prenatal-lethality,-complete-penetrance,SPDEF[lethal]:prenatal-lethality,-incomplete-penetrance	27	7
Chr5	28250000	28750000	0101000001011	13	11	0.354,0.217,0.158,0.05,0.017,0.017,0.014,0.012,0.011,0.006,0.005	152	0	0.011	9	20	0.43	7.5	3	5	0.000394276	ATP6V1D,MPP5,FAM71D,GPHN,BMF,SRP14	ATP6V1D[lethal]:preweaning-lethality,-complete-penetrance,GPHN[lethal]:neonatal-lethality,-complete-penetrance	30	12
Chr2	80250000	80750000	101101110	9	5	0.928,0.01,0.01,0.007,0.005	92	0	0.007	10	11	0.16	7	2	4	0.000607603	VWC2,ZPBP,C7orf72,IKZF1,FIGNL1,DDC	IKZF1[lethal]:lethality-throughout-fetal-growth-and-development,-complete-penetrance;postnatal-lethality,-incomplete-penetrance;lethality,-complete-penetrance,DDC[lethal]:preweaning-lethality,-complete-penetrance;prenatal-lethality,-incomplete-penetrance	28	10
Chr2	79250000	79750000	10111011010110	14	9	0.451,0.198,0.094,0.073,0.028,0.018,0.007,0.007,0.006	98	0	0.007	8	14	0.18	7	2	4	0.000607603	ADCY2,ENSGALG00000013105,PAPD7,SRD5A1,NSUN2	-	28	13
Chr9	2750000	3250000	0000010100000010001010001	25	28	0.094,0.086,0.041,0.035,0.034,0.032,0.032,0.031,0.021,0.016,0.016,0.016,0.016,0.016,0.015,0.015,0.011,0.01,0.01,0.009,0.009,0.008,0.007,0.007,0.006,0.006,0.006,0.006	91	0	0.007	4	14	0.15	8.5	2	4	8.52639e-05	ENSGALG00000006724,ENSGALG00000027551,IMP4,CCDC61,ENSGALG00000006716,VPS8,ENSGALG00000024369,EHHADH,MAP3K13,TMEM41A,LIPH,CEP63,KY,EPHB1	EHHADH[lethal]:postnatal-lethality,-incomplete-penetrance;neonatal-lethality,-incomplete-penetrance	34	17
Chr3	105000000	105500000	001110100010011101	18	27	0.174,0.105,0.063,0.058,0.049,0.036,0.031,0.028,0.021,0.017,0.016,0.015,0.014,0.014,0.012,0.01,0.009,0.008,0.007,0.007,0.006,0.006,0.006,0.006,0.005,0.005,0.005	82	0	0.006	4	7	0.12	7.5	2	4	0.000394276	ENSGALG00000016599,Pomc,EFR3B,DNAJC27,ADCY3,CENPO,PTRHD1,NCOA1,ZNF395,PNOC,ENSGALG00000026301,[4Fe-4S],FBXO16,FZD3	Pomc[lethal]:prenatal-lethality,-incomplete-penetrance;perinatal-lethality,-incomplete-penetrance,ADCY3[lethal]:postnatal-lethality,-incomplete-penetrance;postnatal-lethality,-complete-penetrance,CENPO[lethal]:preweaning-lethality,-complete-penetrance,FBXO16[lethal]:preweaning-lethality,-complete-penetrance,FZD3[lethal]:neonatal-lethality,-complete-penetrance;preweaning-lethality,-incomplete-pene…	30	16
Chr4	70000000	70500000	11111101111101	14	8	0.833,0.053,0.02,0.018,0.015,0.013,0.007,0.006	178	0	0.013	7	27	0.59	8.25	3	7	0.000143906	ZNF322	-	33	20
Chr4	84250000	84750000	010100100011101001	18	18	0.183,0.115,0.101,0.093,0.055,0.044,0.042,0.031,0.019,0.017,0.016,0.015,0.015,0.013,0.012,0.01,0.007,0.005	229	0	0.017	22	19	0.97	7	3	7	0.000607603	CTBP1,SPON2,ENSGALG00000015722,RNF212,FGFRL1	CTBP1[lethal]:postnatal-lethality,-incomplete-penetrance;lethality-throughout-fetal-growth-and-development,-complete-penetrance,FGFRL1[lethal]:neonatal-lethality,-complete-penetrance;lethality-throughout-fetal-growth-and-development,-incomplete-penetrance	28	17
Chr2	43750000	44250000	10000010100000000	17	20	0.3,0.081,0.055,0.053,0.051,0.045,0.041,0.033,0.027,0.017,0.014,0.013,0.012,0.01,0.01,0.008,0.008,0.007,0.006,0.005	168	0	0.012	5	11	0.52	8.75	2	4	9.36952e-05	TGM4,KIF15,KIAA1143,CTNNB1,ENSGALG00000011906,ENSGALG00000011933	CTNNB1[lethal]:embryonic-lethality-during-organogenesis,-complete-penetrance;neonatal-lethality,-complete-penetrance;embryonic-lethality,-complete-penetrance;embryonic-lethality-between-implantation-and-somite-formation,-complete-penetrance;prenatal-lethality,-complete-penetrance;lethality-throughout-fetal-growth-and-development,-incomplete-penetrance;perinatal-lethality,-complete-penetrance;pren…	35	13
Chr17	5750000	6250000	00001000000000000010000000000011010	35	22	0.102,0.067,0.067,0.034,0.032,0.03,0.022,0.017,0.014,0.013,0.012,0.01,0.009,0.009,0.007,0.007,0.007,0.007,0.005,0.005,0.005,0.005	224	0	0.017	9	14	0.93	7.25	2	4	0.000359957	FNBP1,GPR107,NCS1,ASS1,FUBP3,PRDM12,EXOSC2,ABL,FIBCD1,LAMC3,AIF1L,NUP214,FAM78A,PLPP7,PRRC2B,POMT1,UCK1,RAPGEF1	GPR107[lethal]:embryonic-lethality;preweaning-lethality;preweaning-lethality,-complete-penetrance;embryonic-lethality-during-organogenesis,-complete-penetrance,NCS1[lethal]:preweaning-lethality,-incomplete-penetrance,ASS1[lethal]:neonatal-lethality,-complete-penetrance;postnatal-lethality,NUP214[lethal]:embryonic-lethality-before-implantation,-complete-penetrance,POMT1[lethal]:embryonic-lethality…	29	24
Chr1	176750000	177250000	01001100011000000100	20	14	0.213,0.186,0.129,0.07,0.053,0.048,0.042,0.026,0.012,0.007,0.007,0.006,0.005,0.005	98	0	0.007	6	14	0.18	6.75	2	4	0.000585219	TNFRSF19,SACS,SGCG	-	27	9
Chr2	123000000	123500000	010000000000	12	11	0.425,0.317,0.044,0.04,0.024,0.02,0.016,0.014,0.011,0.007,0.006	151	0	0.011	7	13	0.42	8.25	4	8	0.000143906	MMP16	-	33	16
Chr24	1750000	2250000	0001000000000000001110111001110000011011111000001000010	55	20	0.066,0.059,0.051,0.039,0.031,0.027,0.023,0.02,0.019,0.016,0.012,0.011,0.011,0.01,0.009,0.006,0.006,0.005,0.005,0.005	75	0	0.006	3	8	0.1	7.5	2	4	0.000394276	SNX19,NTM,OPCML	-	30	11
Chr1	98000000	98500000	000011000000000000	18	14	0.338,0.126,0.119,0.112,0.033,0.021,0.019,0.01,0.008,0.008,0.008,0.006,0.006,0.005	136	0	0.01	6	12	0.34	7.25	2	4	0.000359957	USP25,ENSGALG00000019198	-	29	9
Chr3	51500000	52000000	000000000000001	15	10	0.479,0.195,0.077,0.031,0.022,0.021,0.02,0.014,0.013,0.006	274	0	0.02	17	16	1.39	9.5	2	4	3.42356e-05	TAGAP,RSPH3,ENSGALG00000013751,PLAGL1,ZC2HC1B,ENSGALG00000013765,PHACTR2,FUCA2,PEX3,ADAT2,AIG1,ENSGALG00000028642	PLAGL1[lethal]:postnatal-lethality,-incomplete-penetrance;neonatal-lethality,-incomplete-penetrance;postnatal-lethality;prenatal-lethality;prenatal-lethality,-incomplete-penetrance	38	22
Chr1	194750000	195250000	000000000000000000001100	24	21	0.3,0.089,0.073,0.039,0.028,0.028,0.027,0.016,0.016,0.011,0.01,0.01,0.007,0.007,0.007,0.007,0.006,0.006,0.006,0.005,0.005	148	0	0.011	4	14	0.41	7.25	2	4	0.000359957	RAB6A,MRPL48,PAAF1,DNAJB13,UCP,C2CD3,PPME1,P4HA3,NEU3,SPCS2,XRRA1,RNF169,CHRDL2,POLD3,KCNE3,PGM2L1,ENSGALG00000022694,TPBGL,SLCO2B1	C2CD3[lethal]:embryonic-lethality-during-organogenesis,-complete-penetrance,PPME1[lethal]:neonatal-lethality,-complete-penetrance,POLD3[lethal]:preweaning-lethality,-complete-penetrance	29	20
Chr1	70500000	71000000	11101110111100101101	20	12	0.448,0.114,0.084,0.068,0.044,0.037,0.029,0.014,0.009,0.008,0.006,0.006	194	0	0.014	11	25	0.7	6.5	2	4	0.00095425	UPK3A,SMC1B,RIBC2,FBLN1,ATXN10,WNT7B	FBLN1[lethal]:postnatal-lethality,-incomplete-penetrance;perinatal-lethality,-incomplete-penetrance;neonatal-lethality,-complete-penetrance,ATXN10[lethal]:embryonic-lethality-between-implantation-and-placentation,-complete-penetrance;preweaning-lethality,-complete-penetrance,WNT7B[lethal]:embryonic-lethality,-complete-penetrance;neonatal-lethality,-complete-penetrance;neonatal-lethality,-incomple…	26	9
Chr14	1500000	2000000	01001100000101010101101	23	15	0.358,0.117,0.091,0.057,0.052,0.029,0.027,0.021,0.016,0.011,0.007,0.007,0.006,0.006,0.005	82	0	0.006	5	12	0.12	6.5	2	4	0.00095425	ENSGALG00000003611,ENSGALG00000003615,ENSGALG00000003618,FAM20C,ENSGALG00000024294,PDGF-A	FAM20C[lethal]:postnatal-lethality,-incomplete-penetrance;preweaning-lethality,-complete-penetrance	26	14
Chr12	9000000	9500000	00000000001000100000000	23	16	0.548,0.061,0.053,0.028,0.025,0.024,0.017,0.013,0.012,0.011,0.011,0.01,0.01,0.009,0.008,0.005	326	0	0.024	21	30	1.97	9.25	4	8	3.28595e-05	NCKIPSD,CELSR3,SLC26A6,UQCRC1,COL7A1,ENSGALG00000028620,COPG1,C12H3ORF37,ENSGALG00000026449,RAB7A,RPN1,GATA2,DNAJB8,ENSGALG00000021866,EEFSEC,RUVBL1	CELSR3[lethal]:neonatal-lethality,-complete-penetrance,COL7A1[lethal]:postnatal-lethality,-complete-penetrance;postnatal-lethality,COPG1[lethal]:embryonic-lethality;preweaning-lethality,GATA2[lethal]:embryonic-lethality-during-organogenesis,-complete-penetrance;embryonic-lethality,-complete-penetrance;postnatal-lethality,-incomplete-penetrance;perinatal-lethality,-incomplete-penetrance;lethality-…	37	14
Chr26	1000000	1500000	00100000000000111000000000000000001010010100	44	16	0.129,0.094,0.054,0.049,0.036,0.026,0.021,0.02,0.008,0.008,0.007,0.007,0.006,0.006,0.005,0.005	99	0	0.007	3	8	0.18	7.25	2	4	0.000359957	MYBPH,DENND2D,CEPT1,LRIF1,ENSGALG00000000104,ENSGALG00000000099,UBE2T,ADIPOR1,TIMM17A,LMOD1,KIAA1324,SARS,AHCYL1,STRIP1,ALX3,ENSGALG00000028055,SLC6A17,KCNC4,RBM15,SLC16A4,HBXIP,PROK1,ENSGALG00000000437,Segment,KCNA2,ENSGALG00000000446,cKv1.1,PNPLA1,ENSGALG00000000483,ENSGALG00000000497,ETV7,KCTD20	DENND2D[lethal]:preweaning-lethality,-incomplete-penetrance,ALX3[lethal]:neonatal-lethality,-complete-penetrance;neonatal-lethality,-incomplete-penetrance;preweaning-lethality,-incomplete-penetrance,RBM15[lethal]:embryonic-lethality-during-organogenesis,-complete-penetrance,KCNA2[lethal]:postnatal-lethality,-complete-penetrance;postnatal-lethality,PNPLA1[lethal]:preweaning-lethality,-incomplete-p…	29	26
Chr1	24250000	24750000	0111011110	10	14	0.559,0.125,0.087,0.064,0.018,0.014,0.013,0.011,0.01,0.01,0.008,0.008,0.008,0.006	246	0	0.018	21	26	1.12	10	4	8	2.23611e-05	CORTBP2,CFTR,ENSGALG00000029113,ST7,CAPZA2	CFTR[lethal]:postnatal-lethality,-incomplete-penetrance;preweaning-lethality,-complete-penetrance;lethality,-incomplete-penetrance;postnatal-lethality,-complete-penetrance,CAPZA2[lethal]:preweaning-lethality,-incomplete-penetrance	40	21
Chr2	42750000	43250000	00000000001000000001	20	13	0.325,0.144,0.09,0.069,0.045,0.024,0.016,0.016,0.009,0.009,0.009,0.007,0.005	220	0	0.016	15	17	0.9	7.5	2	6	0.000394276	ACPP,DNAJC13,ACAD11,ACKR4,UBA5,ENSGALG00000011703,TMEM108,CP49,CDV3,TOPBP1	UBA5[lethal]:embryonic-lethality-during-organogenesis,-complete-penetrance,TOPBP1[lethal]:embryonic-lethality-at-implantation,-complete-penetrance;embryonic-lethality-before-implantation,-complete-penetrance	30	12
Chr5	32500000	33000000	0010100001000100	16	16	0.259,0.204,0.162,0.096,0.045,0.023,0.017,0.015,0.012,0.01,0.009,0.007,0.007,0.006,0.006,0.005	311	0	0.023	10	31	1.79	9.5	4	7	3.42356e-05	FOXG1	FOXG1[lethal]:neonatal-lethality,-complete-penetrance;perinatal-lethality,-complete-penetrance	38	12
