# Supplementary material for: A survey of functional genomic variation in domesticated chickens
Source: Genet Sel Evol. 2018 Apr 16;50:17. doi: 10.1186/s12711-018-0390-1 (PMC5902831; doi:10.1186/s12711-018-0390-1)
Supplement: Supplementary file 4 — Additional file 4: Table S1. Candidate EL variants. [file 12711_2018_390_MOESM4_ESM.xlsx]

## Sheet: Description
CHROM	Chromsome
POS	Position
REF	Reference allele
ALT	Alternate allele
QUAL	Variant quality score
Number_of_samples	Number of animals with genotype call
Allele_count	Number of animals with allele
Allele_number	Number of times the allele was called
Allele_frequency	Allele frequency
Allele_count_homozygote	Allele count homozygote
Allele_count_heterozygote	Allele count heterozygote
Breed	Breed
Allele_count_breed(WA_het:WA_hom,WD_het:WD_hom,W1_het:W1_hom)	Number of heterozygote and homozygote carrier animals in the different lines
tAllele_count_samples(WA_het:WA_hom,WD_het:WD_hom,W1_het:W1_hom)	Heterozygote and homozygote carrier animals in the different lines
RNA_seq_coverage(ensembl)	Ensembl RNA-seq coverage
Ensembl_Orthology(one2one|one2many|many2many)	Ensembl orthology
Consequence	Consequence of variant
IMPACT	Impact of the variant
SYMBOL	Gene symbol
Gene	Gene id (ensembl)
Transcript	Transcript id (ensembl)
EXON_NR	Exon number
INTRON_NR	Intron number
cDNA_position	Position in cDNA
CDS_position	Position in CDS
Protein_position	Position in protein
Amino_acids	Amino acid change
Codons	Codon change
Phenotype	Phenotype assigned to gene
SIFT	Sift score
Provean	Provean score
Domains	Protein domains
GO	Gene ontology annotations
Phenotype	MGI phenotype associations with gene
dbSNP	Variant annotated in dbSNP (YES/NO)

## Sheet: TableS1
TableS1: Candidate EL variants
CHROM	POS	REF	ALT	QUAL	Number_of_samples	Allele_count	Allele_number	Allele_frequency	Allele_count_homozygote	Allele_count_heterozygote	Breed	Allele_count_breed(WA_het:WA_hom,WD_het:WD_hom,W1_het:W1_hom)	Allele_count_samples(WA_het:WA_hom,WD_het:WD_hom,W1_het:W1_hom)	RNA_seq_coverage(ensembl)	Ensembl_Orthology(one2one|one2many|many2many)	Consequence	IMPACT	SYMBOL	Gene	Transcript	EXON_NR	INTRON_NR	cDNA_position	CDS_position	Protein_position	Amino_acids	Codons	Phenotype	SIFT	Provean	Domains	GO	Phenotype	dbSNP	Loc
2	149350440	G	A	342.969	245	45	490	0.0918367	0	45	W1	0:0,0:0,45:0	.:.,.:.,GG-WUR-064_GG-WUR-106_GG-WUR-105_GG-WUR-038_GG-WUR-061_GG-WUR-242_GG-WUR-046_GG-WUR-264_GG-WUR-020_GG-WUR-172_GG-WUR-167_GG-WUR-173_GG-WUR-144_GG-WUR-139_GG-WUR-048_GG-WUR-103_GG-WUR-269_GG-WUR-095_GG-WUR-267_GG-WUR-091_GG-WUR-127_GG-WUR-067_GG-WUR-012_GG-WUR-062_GG-WUR-045_GG-WUR-265_GG-WUR-152_GG-WUR-100_GG-WUR-169_GG-WUR-044_GG-WUR-168_GG-WUR-007_GG-WUR-142_GG-WUR-104_GG-WUR-022_GG-WUR…	270	49|3|0	stop_gained	HIGH	SCRIB	ENSGALG00000032790	ENSGALT00000055904	31/33	-	3679	3679	1227	Q/*	Cag/Tag	-	-	NA	PTHR23119&PTHR23119:SF32	-	embryo,respiratory,reproductive,pigmentation,growth/size/body,endocrine/exocrine,limbs/digits/tail,hearing/vestibular/ear,neoplasm,vision/eye,observed,mortality/aging,nervous system,craniofacial,homeostasis,cardiovascular	NO	2:149350440
2	62310391	C	T	5593.41	240	32	480	0.0666667	0	32	W1	0:0,0:0,32:0	.:.,.:.,GG-WUR-106_GG-WUR-242_GG-WUR-110_GG-WUR-087_GG-WUR-020_GG-WUR-006_GG-WUR-167_GG-WUR-098_GG-WUR-268_GG-WUR-173_GG-WUR-144_GG-WUR-269_GG-WUR-095_GG-WUR-067_GG-WUR-012_GG-WUR-174_GG-WUR-045_GG-WUR-265_GG-WUR-017_GG-WUR-099_GG-WUR-025_GG-WUR-013_GG-WUR-044_GG-WUR-168_GG-WUR-007_GG-WUR-019_GG-WUR-250_GG-WUR-148_GG-WUR-246_GG-WUR-011_GG-WUR-245_GG-WUR-074:.	4925	62|7|0	missense_variant	MODERATE	PAK1IP1	ENSGALG00000012724	ENSGALT00000020771	10/10	-	1187	1027	343	R/C	Cgc/Tgc	-	deleterious_low_confidence(0.02)	-1.358	-	nucleolus [GO:0005730]; nucleoplasm [GO:0005654]; plasma membrane [GO:0005886]; cell proliferation [GO:0008283]; palate development [GO:0060021]	respiratory,skeleton,craniofacial,cellular,mortality/aging,integument,nervous system,growth/size/body,homeostasis,digestive/alimentary	YES	2:62310391
8	6149238	A	T	4980.51	250	27	500	0.054	0	27	WD	0:0,27:0,0:0	.:.,GG-WUR-205_GG-WUR-203_GG-WUR-241_GG-WUR-179_GG-WUR-221_GG-WUR-138_GG-WUR-076_GG-WUR-230_GG-WUR-198_GG-WUR-132_GG-WUR-197_GG-WUR-178_GG-WUR-210_GG-WUR-185_GG-WUR-199_GG-WUR-078_GG-WUR-077_GG-WUR-083_GG-WUR-193_GG-WUR-080_GG-WUR-214_GG-WUR-227_GG-WUR-215_GG-WUR-231_GG-WUR-183_GG-WUR-225_GG-WUR-232:.,.:.	291	62|0|0	missense_variant	MODERATE	NPHS2	ENSGALG00000004163	ENSGALT00000006621	1/8	-	196	160	54	S/C	Agc/Tgc	-	deleterious(0.05)	-1.789	PTHR10264&PTHR10264:SF23	extracellular exosome [GO:0070062]; integral component of plasma membrane [GO:0005887]; intrinsic component of the cytoplasmic side of the plasma membrane [GO:0031235]; membrane raft [GO:0045121]; protein complex [GO:0043234]; slit diaphragm [GO:0036057]; actin cytoskeleton reorganization [GO:0031532]; excretion [GO:0007588]; metanephric glomerular visceral epithelial cell development [GO:0072249]	growth/size/body,renal/urinary,observed,mortality/aging,homeostasis,cardiovascular	YES	8:6149238
8	20215711	C	T	4736.85	245	26	490	0.0530612	0	26	W1	0:0,0:0,26:0	.:.,.:.,GG-WUR-061_GG-WUR-087_GG-WUR-014_GG-WUR-049_GG-WUR-128_GG-WUR-165_GG-WUR-172_GG-WUR-266_GG-WUR-048_GG-WUR-091_GG-WUR-127_GG-WUR-026_GG-WUR-045_GG-WUR-017_GG-WUR-152_GG-WUR-099_GG-WUR-025_GG-WUR-013_GG-WUR-168_GG-WUR-146_GG-WUR-005_GG-WUR-023_GG-WUR-058_GG-WUR-145_GG-WUR-011_GG-WUR-015:.	527	46|27|0	missense_variant	MODERATE	PTPRF	ENSGALG00000010053	ENSGALT00000077706	28/28	-	5014	5014	1672	R/C	Cgc/Tgc	-	deleterious_low_confidence(0.03)	-2.387	-	integral component of membrane [GO:0016021]; protein tyrosine phosphatase activity [GO:0004725]integral component of membrane [GO:0016021]; protein tyrosine phosphatase activity [GO:0004725]integral component of membrane [GO:0016021]; protein tyrosine phosphatase activity [GO:0004725]integral component of membrane [GO:0016021]; protein tyrosine phosphatase activity [GO:0004725]integral component …	muscle,behavior,growth/size/body,endocrine/exocrine,vision/eye,cellular,mortality/aging,integument,nervous system,homeostasis,cardiovascular	YES	8:20215711
11	19314171	G	A	4262.89	240	25	480	0.0520833	0	25	WD	0:0,25:0,0:0	.:.,GG-WUR-203_GG-WUR-235_GG-WUR-202_GG-WUR-192_GG-WUR-186_GG-WUR-138_GG-WUR-217_GG-WUR-071_GG-WUR-211_GG-WUR-180_GG-WUR-126_GG-WUR-198_GG-WUR-188_GG-WUR-082_GG-WUR-185_GG-WUR-078_GG-WUR-200_GG-WUR-223_GG-WUR-072_GG-WUR-080_GG-WUR-214_GG-WUR-219_GG-WUR-225_GG-WUR-079_GG-WUR-190:.,.:.	294	62|5|0	missense_variant	MODERATE	WWP2	ENSGALG00000000699	ENSGALT00000077253	22/23	-	2635	2635	879	G/S	Ggc/Agc	-	deleterious(0.03)	1.961	Low_complexity_(Seg):seg&PROSITE_profiles:PS50237&PTHR11254:SF287&PTHR11254&Pfam_domain:PF00632&PIRSF_domain:PIRSF001569&SMART_domains:SM00119&Superfamily_domains:SSF56204	ubiquitin-protein transferase activity [GO:0004842]cytoplasm [GO:0005737]; extracellular exosome [GO:0070062]; membrane [GO:0016020]; nucleus [GO:0005634]; transcriptional activator activity, RNA polymerase II transcription factor binding [GO:0001190]; ubiquitin protein ligase activity [GO:0061630]; ubiquitin-protein transferase activity [GO:0004842]; negative regulation of protein transport [GO:…	skeleton,craniofacial,immune,mortality/aging,growth/size/body,homeostasis	YES	11:19314171
14	4212930	C	A	30.7879	243	24	486	0.0493827	0	24	WD_W1	0:0,16:0,8:0	.:.,GG-WUR-228_GG-WUR-220_GG-WUR-186_GG-WUR-230_GG-WUR-197_GG-WUR-178_GG-WUR-210_GG-WUR-185_GG-WUR-222_GG-WUR-224_GG-WUR-176_GG-WUR-214_GG-WUR-183_GG-WUR-079_GG-WUR-212_GG-WUR-232:.,GG-WUR-046_GG-WUR-065_GG-WUR-172_GG-WUR-010_GG-WUR-151_GG-WUR-170_GG-WUR-171_GG-WUR-104:.	1050	50|9|0	missense_variant	MODERATE	FSCN1	ENSGALG00000021128	ENSGALT00000034001	5/5	-	1769	1769	590	S/Y	tCc/tAc	-	deleterious(0)	-2.733	2.80.10.50&Pfam_domain:PF06268&PTHR10551&PTHR10551:SF8&Superfamily_domains:SSF50405	cell projection membrane [GO:0031253]; cell-cell adherens junction [GO:0005913]; cytoplasm [GO:0005737]; extracellular exosome [GO:0070062]; filamentous actin [GO:0031941]; filopodium [GO:0030175]; growth cone [GO:0030426]; invadopodium [GO:0071437]; lamellipodium [GO:0030027]; microspike [GO:0044393]; microvillus [GO:0005902]; myelin sheath [GO:0043209]; podosome [GO:0002102]; ruffle [GO:0001726…	immune,cellular,mortality/aging	NO	14:4212930
1	106810506	G	A	5055.91	243	24	486	0.0493827	0	24	WA_W1	9:0,0:0,15:0	GG-WUR-154_GG-WUR-156_GG-WUR-113_GG-WUR-159_GG-WUR-115_GG-WUR-238_GG-WUR-254_GG-WUR-129_GG-WUR-237:.,.:.,GG-WUR-105_GG-WUR-020_GG-WUR-139_GG-WUR-166_GG-WUR-018_GG-WUR-067_GG-WUR-012_GG-WUR-170_GG-WUR-099_GG-WUR-142_GG-WUR-019_GG-WUR-146_GG-WUR-008_GG-WUR-015_GG-WUR-074:.	254	55|2|0	missense_variant	MODERATE	SIM2	ENSGALG00000016044	ENSGALT00000054100	3/10	-	227	227	76	R/H	cGc/cAc	-	deleterious(0.01)	-0.207	PTHR23043&PTHR23043:SF19&SMART_domains:SM00091	nucleoplasm [GO:0005654]; DNA binding [GO:0003677]; RNA polymerase II transcription factor activity, sequence-specific DNA binding [GO:0000981]; embryonic pattern specification [GO:0009880]; lung development [GO:0030324]; negative regulation of transcription from RNA polymerase II promoter [GO:0000122]; nervous system development [GO:0007399]; regulation of transcription from RNA polymerase II pr…	respiratory,skeleton,craniofacial,mortality/aging,growth/size/body,digestive/alimentary	YES	1:106810506
5	23101183	A	C	3053.38	247	23	494	0.0465587	0	23	WA_WD	8:0,15:0,0:0	GG-WUR-068_GG-WUR-154_GG-WUR-121_GG-WUR-113_GG-WUR-162_GG-WUR-238_GG-WUR-118_GG-WUR-260:.,GG-WUR-205_GG-WUR-182_GG-WUR-177_GG-WUR-208_GG-WUR-206_GG-WUR-126_GG-WUR-196_GG-WUR-198_GG-WUR-082_GG-WUR-210_GG-WUR-199_GG-WUR-195_GG-WUR-073_GG-WUR-184_GG-WUR-215:.,.:.	1249	64|4|0	missense_variant	MODERATE	MADD	ENSGALG00000008181	ENSGALT00000013318	1/32	-	51	51	17	C/W	tgT/tgG	-	deleterious(0.01)	0.918	Low_complexity_(Seg):seg&Cleavage_site_(Signalp):SignalP-noTM&SMART_domains:SM00800	cytoplasm [GO:0005737]; integral component of membrane [GO:0016021]; plasma membrane [GO:0005886]; Rab guanyl-nucleotide exchange factor activity [GO:0017112]; activation of MAPK activity [GO:0000187]; execution phase of apoptosis [GO:0097194]; regulation of cell cycle [GO:0051726]; regulation of extrinsic apoptotic signaling pathway via death domain receptors [GO:1902041]; regulation of Rab prot…	respiratory,skeleton,growth/size/body,endocrine/exocrine,immune,vision/eye,homeostasis,behavior,no abnormal phenotype observed,mortality/aging,integument,nervous system,hematopoietic,cardiovascular	YES	5:23101183
1	122963712	T	C	2465.81	235	18	470	0.0382979	0	18	W1	0:0,0:0,18:0	.:.,.:.,GG-WUR-064_GG-WUR-157_GG-WUR-006_GG-WUR-139_GG-WUR-269_GG-WUR-016_GG-WUR-151_GG-WUR-099_GG-WUR-247_GG-WUR-169_GG-WUR-168_GG-WUR-040_GG-WUR-243_GG-WUR-066_GG-WUR-246_GG-WUR-248_GG-WUR-245_GG-WUR-074:.	652	58|12|0	missense_variant	MODERATE	OFD1	ENSGALG00000016576	ENSGALT00000026755	1/22	-	56	56	19	Y/C	tAt/tGt	-	deleterious(0)	-7.42	PTHR15431:SF5&PTHR15431	centriole [GO:0005814]; ciliary basal body [GO:0036064]; membrane [GO:0016020]	embryo,nervous system,skeleton,craniofacial,limbs/digits/tail,renal/urinary,respiratory,cellular,mortality/aging,cardiovascular,growth/size/body,digestive/alimentary	YES	1:122963712
6	23235187	C	T	2016.85	244	18	488	0.0368852	0	18	WD	0:0,18:0,0:0	.:.,GG-WUR-203_GG-WUR-235_GG-WUR-192_GG-WUR-076_GG-WUR-230_GG-WUR-197_GG-WUR-178_GG-WUR-222_GG-WUR-125_GG-WUR-083_GG-WUR-224_GG-WUR-176_GG-WUR-080_GG-WUR-137_GG-WUR-084_GG-WUR-213_GG-WUR-181_GG-WUR-231:.,.:.	1949	63|4|0	missense_variant	MODERATE	SUFU	ENSGALG00000008096	ENSGALT00000013142	7/12	-	895	895	299	R/W	Cgg/Tgg	-	deleterious(0)	-2.795	PTHR10928&PTHR10928:SF2&Pfam_domain:PF12470&PIRSF_domain:PIRSF011844	cilium [GO:0005929]; cytoplasm [GO:0005737]; nucleoplasm [GO:0005654]; nucleus [GO:0005634]; signal transducer activity [GO:0004871]; transcription corepressor activity [GO:0003714]; transcription factor binding [GO:0008134]; aorta development [GO:0035904]; coronary vasculature development [GO:0060976]; cytoplasmic sequestering of transcription factor [GO:0042994]; heart looping [GO:0001947]; mul…	embryo,nervous system,skeleton,pigmentation,craniofacial,adipose,limbs/digits/tail,immune,respiratory,vision/eye,hematopoietic,mortality/aging,integument,cardiovascular,growth/size/body,homeostasis,digestive/alimentary	YES	6:23235187
25	1466100	T	C	96.9564	247	18	494	0.0364372	0	18	WA_WD_W1	4:0,4:0,10:0	GG-WUR-254_GG-WUR-164_GG-WUR-053_GG-WUR-060:.,GG-WUR-203_GG-WUR-179_GG-WUR-084_GG-WUR-213:.,GG-WUR-106_GG-WUR-014_GG-WUR-157_GG-WUR-020_GG-WUR-047_GG-WUR-139_GG-WUR-025_GG-WUR-019_GG-WUR-101_GG-WUR-093:.	1496	50|4|0	missense_variant	MODERATE	NES	ENSGALG00000013239	ENSGALT00000032638	4/5	-	2336	2336	779	E/G	gAg/gGg	-	deleterious_low_confidence(0)	1	-	intermediate filament [GO:0005882]; structural molecule activity [GO:0005198]intermediate filament [GO:0005882]; structural molecule activity [GO:0005198]	embryo,behavior,growth/size/body,adipose,endocrine/exocrine,immune,neoplasm,vision/eye,homeostasis,cellular,no abnormal phenotype observed,mortality/aging,nervous system,hematopoietic,cardiovascular	YES	25:1466100
7	18915261	G	A	2391.53	246	17	492	0.0345528	0	17	WA_WD	13:0,4:0,0:0	GG-WUR-108_GG-WUR-262_GG-WUR-159_GG-WUR-239_GG-WUR-092_GG-WUR-055_GG-WUR-175_GG-WUR-153_GG-WUR-118_GG-WUR-252_GG-WUR-111_GG-WUR-260_GG-WUR-053:.,GG-WUR-211_GG-WUR-178_GG-WUR-082_GG-WUR-125:.,.:.	3291	65|4|0	missense_variant	MODERATE	LRP2	ENSGALG00000010858	ENSGALT00000017651	56/79	-	11058	10940	3647	G/D	gGc/gAc	-	deleterious(0)	-6.615	PROSITE_profiles:PS50068&PTHR10529&PTHR10529:SF232&Pfam_domain:PF00057&4.10.400.10&SMART_domains:SM00192&Superfamily_domains:SSF57424	apical plasma membrane [GO:0016324]; brush border membrane [GO:0031526]; clathrin-coated pit [GO:0005905]; endocytic vesicle [GO:0030139]; endoplasmic reticulum [GO:0005783]; endosome [GO:0005768]; extracellular exosome [GO:0070062]; Golgi apparatus [GO:0005794]; integral component of membrane [GO:0016021]; lysosomal membrane [GO:0005765]; receptor complex [GO:0043235]; calcium ion binding [GO:00…	embryo,respiratory,skeleton,reproductive,hearing/vestibular/ear,craniofacial,endocrine/exocrine,limbs/digits/tail,immune,renal/urinary,vision/eye,homeostasis,behavior,cardiovascular,mortality/aging,nervous system,cellular,growth/size/body,hematopoietic,digestive/alimentary	YES	7:18915261
17	5458262	C	T	3656.68	236	17	472	0.0360169	0	17	W1	0:0,0:0,17:0	.:.,.:.,GG-WUR-064_GG-WUR-038_GG-WUR-046_GG-WUR-087_GG-WUR-157_GG-WUR-020_GG-WUR-006_GG-WUR-139_GG-WUR-103_GG-WUR-024_GG-WUR-095_GG-WUR-067_GG-WUR-169_GG-WUR-168_GG-WUR-066_GG-WUR-149_GG-WUR-158:.	767	56|21|0	missense_variant	MODERATE	SH2D3C	ENSGALG00000005036	ENSGALT00000008075	6/11	-	1030	949	317	R/C	Cgc/Tgc	-	deleterious(0)	-3.524	PTHR14247:SF6&PTHR14247	intracellular [GO:0005622]; SH3/SH2 adaptor activity [GO:0005070]; JNK cascade [GO:0007254]	behavior,reproductive,endocrine/exocrine,immune,cellular,mortality/aging,nervous system,hematopoietic	YES	17:5458262
8	5577103	G	A	3668.3	246	16	492	0.0325203	0	16	WD	0:0,16:0,0:0	.:.,GG-WUR-075_GG-WUR-235_GG-WUR-220_GG-WUR-189_GG-WUR-076_GG-WUR-196_GG-WUR-218_GG-WUR-195_GG-WUR-176_GG-WUR-233_GG-WUR-223_GG-WUR-187_GG-WUR-191_GG-WUR-225_GG-WUR-190_GG-WUR-212:.,.:.	679	67|2|0	missense_variant	MODERATE	DARS2	ENSGALG00000023749	ENSGALT00000005721	11/17	-	1096	1096	366	G/S	Ggc/Agc	-	tolerated(0.14)	-5.968	3.30.1360.30&MF_00044&Pfam_domain:PF00152&Pfam_domain:PF02938&PROSITE_profiles:PS50862&Superfamily_domains:SSF55261&TIGRFAM_domain:TIGR00459	mitochondrion [GO:0005739]; nucleus [GO:0005634]; aspartate-tRNA ligase activity [GO:0004815]; aspartate-tRNA(Asn) ligase activity [GO:0050560]; ATP binding [GO:0005524]; nucleic acid binding [GO:0003676]; mitochondrial asparaginyl-tRNA aminoacylation [GO:0070145]	mortality/aging	YES	8:5577103
3	76731456	G	A	3177.86	246	16	492	0.0325203	0	16	W1	0:0,0:0,16:0	.:.,.:.,GG-WUR-038_GG-WUR-124_GG-WUR-157_GG-WUR-098_GG-WUR-166_GG-WUR-269_GG-WUR-249_GG-WUR-174_GG-WUR-170_GG-WUR-057_GG-WUR-169_GG-WUR-066_GG-WUR-005_GG-WUR-058_GG-WUR-011_GG-WUR-063:.	997	61|2|0	missense_variant	MODERATE	SLC35A1	ENSGALG00000015808	ENSGALT00000078578	3/6	-	365	70	24	R/W	Cgg/Tgg	-	deleterious_low_confidence(0.03)	-0.442	-	Golgi membrane [GO:0000139]; integral component of membrane [GO:0016021]; sugar:proton symporter activity [GO:0005351]Golgi membrane [GO:0000139]; integral component of membrane [GO:0016021]; sugar:proton symporter activity [GO:0005351]Golgi membrane [GO:0000139]; integral component of membrane [GO:0016021]; sugar:proton symporter activity [GO:0005351]Golgi membrane [GO:0000139]; integral compone…	mortality/aging	YES	3:76731456
14	6006143	AGCTGATT	AGCTGATGCTGATT	940.812	243	14	486	0.0288066	0	14	WD	0:0,14:0,0:0	.:.,GG-WUR-203_GG-WUR-189_GG-WUR-177_GG-WUR-217_GG-WUR-208_GG-WUR-126_GG-WUR-077_GG-WUR-195_GG-WUR-176_GG-WUR-072_GG-WUR-204_GG-WUR-080_GG-WUR-137_GG-WUR-212:.,.:.	283	60|6|0	inframe_insertion	MODERATE	CHTF18	ENSGALG00000040157	ENSGALT00000057565	21/22	-	2746-2752	2702-2708	901-903	QSA/QSASA	cAATCAGCt/cAATCAGCATCAGCt	-	-	-4.333	PTHR23389&PTHR23389:SF3	ATP binding [GO:0005524]	cellular,reproductive,growth/size/body,endocrine/exocrine,behavior,mortality/aging,homeostasis	NO	14:6006143
2	38741329	G	A	1518.43	246	14	492	0.0284553	0	14	W1	0:0,0:0,14:0	.:.,.:.,GG-WUR-038_GG-WUR-124_GG-WUR-046_GG-WUR-264_GG-WUR-006_GG-WUR-062_GG-WUR-151_GG-WUR-100_GG-WUR-013_GG-WUR-104_GG-WUR-011_GG-WUR-063_GG-WUR-150_GG-WUR-093:.	818	47|22|12	missense_variant	MODERATE	EOMES	ENSGALG00000027247	ENSGALT00000042658	6/6	-	1295	1295	432	T/M	aCg/aTg	1	deleterious(0.02)	-2.605	PTHR11267:SF13&PTHR11267	nucleus [GO:0005634]; chromatin binding [GO:0003682]; RNA polymerase II regulatory region sequence-specific DNA binding [GO:0000977]; transcription factor activity, sequence-specific DNA binding [GO:0003700]; transcriptional repressor activity, RNA polymerase II transcription factor binding [GO:0001191]; cardioblast differentiation [GO:0010002]; CD8-positive, alpha-beta T cell differentiation inv…	embryo,skeleton,reproductive,growth/size/body,observed,adipose,immune,neoplasm,vision/eye,cellular,behavior,mortality/aging,nervous system,hematopoietic	YES	2:38741329
5	325232	C	T	2582.47	241	14	482	0.0290456	0	14	WD	0:0,14:0,0:0	.:.,GG-WUR-228_GG-WUR-192_GG-WUR-198_GG-WUR-132_GG-WUR-185_GG-WUR-070_GG-WUR-083_GG-WUR-195_GG-WUR-176_GG-WUR-193_GG-WUR-073_GG-WUR-080_GG-WUR-231_GG-WUR-183:.,.:.	674	59|4|0	missense_variant	MODERATE	SPTB	ENSGALG00000036805	ENSGALT00000056882	30/34	-	6350	6350	2117	P/L	cCg/cTg	-	deleterious(0.04)	-2.265	PTHR11915&PTHR11915:SF325&PIRSF_domain:PIRSF002297	spectrin [GO:0008091]; phospholipid binding [GO:0005543]; structural constituent of cytoskeleton [GO:0005200]	reproductive,growth/size/body,adipose,liver/biliary,immune,renal/urinary,hematopoietic,mortality/aging,nervous system,homeostasis,cardiovascular	YES	5:325232
27	4181957	G	A	117.181	232	14	464	0.0301724	0	14	W1	0:0,0:0,14:0	.:.,.:.,GG-WUR-064_GG-WUR-105_GG-WUR-014_GG-WUR-065_GG-WUR-266_GG-WUR-268_GG-WUR-018_GG-WUR-244_GG-WUR-269_GG-WUR-021_GG-WUR-057_GG-WUR-146_GG-WUR-015_GG-WUR-093:.	3654	61|7|0	missense_variant	MODERATE	NFE2L1	ENSGALG00000011937	ENSGALT00000036155	6/6	-	1865	1865	622	S/F	tCt/tTt	-	deleterious(0.01)	1	Low_complexity_(Seg):seg	cytoplasm [GO:0005737]; endoplasmic reticulum membrane [GO:0005789]; integral component of membrane [GO:0016021]; nucleus [GO:0005634]; transcription factor activity, sequence-specific DNA binding [GO:0003700]; transcription regulatory region sequence-specific DNA binding [GO:0000976]; cellular response to oxidative stress [GO:0034599]; positive regulation of transcription from RNA polymerase II …	embryo,growth/size/body,endocrine/exocrine,liver/biliary,immune,neoplasm,hematopoietic,cellular,mortality/aging,integument,homeostasis	NO	27:4181957
3	16031501	C	T	3401.59	244	14	488	0.0286885	0	14	WD	0:0,14:0,0:0	.:.,GG-WUR-235_GG-WUR-228_GG-WUR-177_GG-WUR-076_GG-WUR-081_GG-WUR-198_GG-WUR-132_GG-WUR-218_GG-WUR-082_GG-WUR-185_GG-WUR-077_GG-WUR-083_GG-WUR-223_GG-WUR-080:.,.:.	670	67|0|0	splice_donor_variant	HIGH	POLR1B	ENSGALG00000032273	ENSGALT00000051780	-	11/14	-	-	-	-	-	-	-	NA	-	nucleus [GO:0005634]; DNA binding [GO:0003677]; DNA-directed RNA polymerase activity [GO:0003899]; ribonucleoside binding [GO:0032549]; transcription, DNA-templated [GO:0006351]	embryo,mortality/aging,cellular	YES	3:16031501
4	35040479	G	A	3107.5	246	13	492	0.0264228	0	13	WA	13:0,0:0,0:0	GG-WUR-059_GG-WUR-253_GG-WUR-261_GG-WUR-113_GG-WUR-036_GG-WUR-239_GG-WUR-092_GG-WUR-134_GG-WUR-090_GG-WUR-240_GG-WUR-260_GG-WUR-094_GG-WUR-112:.,.:.,.:.	537	57|3|0	missense_variant	MODERATE	FRAS1	ENSGALG00000010316	ENSGALT00000038383	49/73	-	7394	7151	2384	T/I	aCt/aTt	-	tolerated(0.16)	-4.767	PTHR11878&PTHR11878:SF29&Pfam_domain:PF16184	integral component of membrane [GO:0016021]; sublamina densa [GO:0061618]; cell communication [GO:0007154]; embryonic limb morphogenesis [GO:0030326]; metanephros morphogenesis [GO:0003338]; morphogenesis of an epithelium [GO:0002009]; palate development [GO:0060021]; protein transport [GO:0015031]; skin development [GO:0043588]	embryo,liver/biliary,respiratory,skeleton,reproductive,pigmentation,craniofacial,nervous system,endocrine/exocrine,limbs/digits/tail,hearing/vestibular/ear,renal/urinary,muscle,vision/eye,cellular,observed,mortality/aging,integument,digestive/alimentary,growth/size/body,cardiovascular	YES	4:35040479
4	35028740	T	C	2674.83	245	13	490	0.0265306	0	13	WA	13:0,0:0,0:0	GG-WUR-059_GG-WUR-261_GG-WUR-113_GG-WUR-120_GG-WUR-036_GG-WUR-239_GG-WUR-092_GG-WUR-134_GG-WUR-090_GG-WUR-240_GG-WUR-260_GG-WUR-094_GG-WUR-112:.,.:.,.:.	364	57|3|0	missense_variant	MODERATE	FRAS1	ENSGALG00000010316	ENSGALT00000038383	62/73	-	9956	9713	3238	N/S	aAc/aGc	-	tolerated(0.05)	-4.429	PTHR11878&PTHR11878:SF29	integral component of membrane [GO:0016021]; sublamina densa [GO:0061618]; cell communication [GO:0007154]; embryonic limb morphogenesis [GO:0030326]; metanephros morphogenesis [GO:0003338]; morphogenesis of an epithelium [GO:0002009]; palate development [GO:0060021]; protein transport [GO:0015031]; skin development [GO:0043588]	embryo,liver/biliary,respiratory,skeleton,reproductive,pigmentation,craniofacial,nervous system,endocrine/exocrine,limbs/digits/tail,hearing/vestibular/ear,renal/urinary,muscle,vision/eye,cellular,observed,mortality/aging,integument,digestive/alimentary,growth/size/body,cardiovascular	YES	4:35028740
14	12494742	G	A	4415.42	247	13	494	0.0263158	0	13	W1	0:0,0:0,13:0	.:.,.:.,GG-WUR-065_GG-WUR-006_GG-WUR-167_GG-WUR-173_GG-WUR-018_GG-WUR-127_GG-WUR-025_GG-WUR-169_GG-WUR-168_GG-WUR-019_GG-WUR-250_GG-WUR-058_GG-WUR-248:.	1127	60|10|0	missense_variant	MODERATE	SLX4	ENSGALG00000031841	ENSGALT00000075999	13/16	-	3986	3485	1162	P/L	cCg/cTg	-	deleterious(0.04)	-2.444	PTHR21541&PTHR21541:SF3	Slx1-Slx4 complex [GO:0033557]; 5'-flap endonuclease activity [GO:0017108]; DNA repair [GO:0006281]; DNA replication [GO:0006260]	skeleton,reproductive,growth/size/body,endocrine/exocrine,limbs/digits/tail,immune,vision/eye,hematopoietic,cellular,mortality/aging,nervous system,craniofacial,homeostasis,cardiovascular	YES	14:12494742
14	12493578	C	T	2817.62	250	13	500	0.026	0	13	W1	0:0,0:0,13:0	.:.,.:.,GG-WUR-065_GG-WUR-006_GG-WUR-167_GG-WUR-173_GG-WUR-018_GG-WUR-127_GG-WUR-025_GG-WUR-169_GG-WUR-168_GG-WUR-019_GG-WUR-250_GG-WUR-058_GG-WUR-248:.	992	60|10|0	missense_variant	MODERATE	SLX4	ENSGALG00000031841	ENSGALT00000075999	13/16	-	5150	4649	1550	R/H	cGt/cAt	-	deleterious(0.05)	-1.357	PTHR21541&PTHR21541:SF3	Slx1-Slx4 complex [GO:0033557]; 5'-flap endonuclease activity [GO:0017108]; DNA repair [GO:0006281]; DNA replication [GO:0006260]	skeleton,reproductive,growth/size/body,endocrine/exocrine,limbs/digits/tail,immune,vision/eye,hematopoietic,cellular,mortality/aging,nervous system,craniofacial,homeostasis,cardiovascular	YES	14:12493578
2	90523573	G	T	2593.35	241	13	482	0.026971	0	13	W1	0:0,0:0,13:0	.:.,.:.,GG-WUR-242_GG-WUR-087_GG-WUR-131_GG-WUR-165_GG-WUR-103_GG-WUR-062_GG-WUR-100_GG-WUR-250_GG-WUR-104_GG-WUR-148_GG-WUR-109_GG-WUR-015_GG-WUR-093:.	4196	60|12|0	missense_variant	MODERATE	GMNN	ENSGALG00000013626	ENSGALT00000022169	7/7	-	864	627	209	D/E	gaC/gaA	1	deleterious_low_confidence(0.04)	1	PTHR13372:SF4&PTHR13372	cytoplasm [GO:0005737]; nucleus [GO:0005634]; negative regulation of cell cycle [GO:0045786]; negative regulation of DNA replication [GO:0008156]; negative regulation of DNA replication origin binding [GO:1902596]; negative regulation of gene expression [GO:0010629]negative regulation of cell cycle [GO:0045786]; negative regulation of DNA replication [GO:0008156]cytoplasm [GO:0005737]; nucleus [G…	embryo,reproductive,endocrine/exocrine,immune,vision/eye,homeostasis,cellular,mortality/aging,hematopoietic	YES	2:90523573
5	23458638	C	T	2036.45	248	13	496	0.0262097	0	13	WD	0:0,13:0,0:0	.:.,GG-WUR-205_GG-WUR-177_GG-WUR-208_GG-WUR-206_GG-WUR-126_GG-WUR-196_GG-WUR-198_GG-WUR-199_GG-WUR-195_GG-WUR-073_GG-WUR-191_GG-WUR-184_GG-WUR-215:.,.:.	3013	58|4|0	missense_variant	MODERATE	ARHGAP1	ENSGALG00000042357	ENSGALT00000053465	2/13	-	507	107	36	P/L	cCg/cTg	-	deleterious(0.01)	1	PTHR23176&PTHR23176:SF28	signal transduction [GO:0007165]	embryo,nervous system,skeleton,reproductive,growth/size/body,adipose,endocrine/exocrine,liver/biliary,immune,renal/urinary,homeostasis,cellular,mortality/aging,integument,muscle,hematopoietic	YES	5:23458638
7	590617	G	A	1880.34	248	13	496	0.0262097	0	13	W1	0:0,0:0,13:0	.:.,.:.,GG-WUR-131_GG-WUR-165_GG-WUR-234_GG-WUR-103_GG-WUR-269_GG-WUR-016_GG-WUR-062_GG-WUR-265_GG-WUR-100_GG-WUR-101_GG-WUR-246_GG-WUR-063_GG-WUR-109:.	34922	51|2|4	missense_variant	MODERATE	COL3A1	ENSGALG00000035584	ENSGALT00000051541	42/51	-	3727	3067	1023	R/W	Cgg/Tgg	-	deleterious(0)	1	PTHR24023&PTHR24023:SF555&Low_complexity_(Seg):seg	proteinaceous extracellular matrix [GO:0005578]; extracellular matrix structural constituent [GO:0005201]proteinaceous extracellular matrix [GO:0005578]; extracellular matrix structural constituent [GO:0005201]proteinaceous extracellular matrix [GO:0005578]; extracellular matrix structural constituent [GO:0005201]	respiratory,growth/size/body,adipose,liver/biliary,immune,cardiovascular,mortality/aging,integument,muscle,homeostasis,digestive/alimentary	NO	7:590617
13	13054380	G	A	3314.78	241	13	482	0.026971	0	13	WA_WD_W1	4:0,2:0,7:0	GG-WUR-154_GG-WUR-175_GG-WUR-134_GG-WUR-160:.,GG-WUR-213_GG-WUR-232:.,GG-WUR-098_GG-WUR-127_GG-WUR-062_GG-WUR-009_GG-WUR-265_GG-WUR-100_GG-WUR-101:.	1506	61|4|0	stop_gained	HIGH	TNIP1	ENSGALG00000004496	ENSGALT00000007164	9/18	-	809	809	270	W/*	tGg/tAg	-	-	NA	PTHR31882&PTHR31882:SF3	cytoplasm [GO:0005737]; nucleoplasm [GO:0005654]; thiol-dependent ubiquitin-specific protease activity [GO:0004843]; glycoprotein biosynthetic process [GO:0009101]; leukocyte cell-cell adhesion [GO:0007159]; modulation by symbiont of host I-kappaB kinase/NF-kappaB cascade [GO:0085032]; MyD88-dependent toll-like receptor signaling pathway [GO:0002755]; negative regulation of ERK1 and ERK2 cascade …	growth/size/body,endocrine/exocrine,liver/biliary,immune,renal/urinary,hematopoietic,cellular,mortality/aging,integument,digestive/alimentary,homeostasis,cardiovascular	YES	13:13054380
1	103975874	A	T	2780.93	224	12	448	0.0267857	0	12	WD	0:0,12:0,0:0	.:.,GG-WUR-202_GG-WUR-189_GG-WUR-186_GG-WUR-138_GG-WUR-071_GG-WUR-208_GG-WUR-230_GG-WUR-196_GG-WUR-188_GG-WUR-195_GG-WUR-073_GG-WUR-084:.,.:.	2104	63|6|0	missense_variant	MODERATE	LTN1	ENSGALG00000015804	ENSGALT00000025483	9/30	-	1247	1234	412	F/I	Ttt/Att	-	tolerated(0.06)	-3.275	PTHR12389&Superfamily_domains:SSF48371	ubiquitin protein ligase activity [GO:0061630]; zinc ion binding [GO:0008270]; protein autoubiquitination [GO:0051865]	mortality/aging,growth/size/body,muscle,nervous system,behavior	YES	1:103975874
20	6097289	A	G	1908.13	237	12	474	0.0253165	0	12	WD_W1	0:0,11:0,1:0	.:.,GG-WUR-235_GG-WUR-192_GG-WUR-211_GG-WUR-198_GG-WUR-132_GG-WUR-197_GG-WUR-185_GG-WUR-222_GG-WUR-199_GG-WUR-078_GG-WUR-176:.,GG-WUR-012:.	2556	53|22|0	missense_variant	MODERATE	NCOA3	ENSGALG00000004570	ENSGALT00000007275	14/23	-	2756	2630	877	N/S	aAt/aGt	-	tolerated(0.22)	-2.553	PTHR10684&PTHR10684:SF3&PIRSF_domain:PIRSF038181	cytoplasm [GO:0005737]; extracellular exosome [GO:0070062]; nuclear chromatin [GO:0000790]; nucleoplasm [GO:0005654]; nucleus [GO:0005634]; histone acetyltransferase activity [GO:0004402]; ligand-dependent nuclear receptor binding [GO:0016922]; ligand-dependent nuclear receptor transcription coactivator activity [GO:0030374]; nuclear hormone receptor binding [GO:0035257]; cellular response to est…	embryo,skeleton,growth/size/body,endocrine/exocrine,liver/biliary,integument,homeostasis,immune,hearing/vestibular/ear,neoplasm,mortality/aging,nervous system,craniofacial,vision/eye,cellular,respiratory,reproductive,adipose,renal/urinary,behavior,no abnormal phenotype observed,muscle,hematopoietic,digestive/alimentary	YES	20:6097289
24	4355039	C	T	3050.57	245	12	490	0.0244898	0	12	W1	0:0,0:0,12:0	.:.,.:.,GG-WUR-014_GG-WUR-234_GG-WUR-016_GG-WUR-062_GG-WUR-017_GG-WUR-152_GG-WUR-100_GG-WUR-057_GG-WUR-169_GG-WUR-005_GG-WUR-148_GG-WUR-011:.	2534	64|3|0	missense_variant	MODERATE	KMT2A	ENSGALG00000006818	ENSGALT00000011022	27/36	-	8731	8731	2911	A/T	Gcc/Acc	-	deleterious_low_confidence(0.03)	-1.456	PIRSF_domain:PIRSF010354	histone methyltransferase complex [GO:0035097]; DNA binding [GO:0003677]; histone methyltransferase activity (H3-K4 specific) [GO:0042800]; zinc ion binding [GO:0008270]; regulation of transcription, DNA-templated [GO:0006355]histone methyltransferase complex [GO:0035097]; DNA binding [GO:0003677]; histone methyltransferase activity (H3-K4 specific) [GO:0042800]; zinc ion binding [GO:0008270]; re…	embryo,liver/biliary,muscle,cellular,reproductive,immune,craniofacial,limbs/digits/tail,hearing/vestibular/ear,renal/urinary,neoplasm,homeostasis,behavior,observed,cardiovascular,mortality/aging,integument,nervous system,growth/size/body,hematopoietic,skeleton	YES	24:4355039
1	53755781	T	C	2157.49	246	12	492	0.0243902	0	12	WD	0:0,12:0,0:0	.:.,GG-WUR-133_GG-WUR-203_GG-WUR-220_GG-WUR-221_GG-WUR-201_GG-WUR-197_GG-WUR-083_GG-WUR-193_GG-WUR-080_GG-WUR-137_GG-WUR-215_GG-WUR-225:.,.:.	513	61|6|0	missense_variant	MODERATE	RIC8B	ENSGALG00000029484	ENSGALT00000053721	1/9	-	38	38	13	H/R	cAt/cGt	-	deleterious_low_confidence(0.03)	0.049	-	-	skeleton,growth/size/body,immune,renal/urinary,mortality/aging,hematopoietic,cardiovascular	YES	1:53755781
21	6752398	A	T	1426.09	241	12	482	0.0248963	0	12	W1	0:0,0:0,12:0	.:.,.:.,GG-WUR-061_GG-WUR-131_GG-WUR-264_GG-WUR-098_GG-WUR-139_GG-WUR-095_GG-WUR-062_GG-WUR-107_GG-WUR-101_GG-WUR-058_GG-WUR-102_GG-WUR-109:.	1831	59|8|0	splice_acceptor_variant	HIGH	HP1BP3	ENSGALG00000010079	ENSGALT00000016382	-	3/12	-	-	-	-	-	-	-	NA	-	nucleosome [GO:0000786]; nucleus [GO:0005634]; DNA binding [GO:0003677]; nucleosome binding [GO:0031491]; cellular response to hypoxia [GO:0071456]; heterochromatin organization [GO:0070828]; nucleosome assembly [GO:0006334]; regulation of cell proliferation [GO:0042127]; regulation of nucleus size [GO:0097298]; regulation of transcription, DNA-templated [GO:0006355]	mortality/aging,growth/size/body	NO	21:6752398
19	4443604	A	T	1635.14	246	11	492	0.0223577	0	11	WD	0:0,11:0,0:0	.:.,GG-WUR-202_GG-WUR-189_GG-WUR-217_GG-WUR-211_GG-WUR-208_GG-WUR-126_GG-WUR-185_GG-WUR-176_GG-WUR-073_GG-WUR-204_GG-WUR-183:.,.:.	3128	61|5|2	missense_variant	MODERATE	UNC45B	ENSGALG00000002186	ENSGALT00000003422	7/20	-	674	674	225	I/N	aTc/aAc	-	deleterious(0)	-5.4	Superfamily_domains:SSF48371	cytosol [GO:0005829]; chaperone-mediated protein folding [GO:0061077]	mortality/aging	NO	19:4443604
11	17823782	G	A	3661.74	239	11	478	0.0230126	0	11	WA	11:0,0:0,0:0	GG-WUR-261_GG-WUR-092_GG-WUR-130_GG-WUR-134_GG-WUR-088_GG-WUR-090_GG-WUR-240_GG-WUR-135_GG-WUR-260_GG-WUR-094_GG-WUR-056:.,.:.,.:.	10846	58|2|0	missense_variant	MODERATE	IRF8	ENSGALG00000005757	ENSGALT00000009243	6/8	-	783	734	245	T/I	aCc/aTc	-	deleterious(0.02)	-1.7	PTHR11949&PTHR11949:SF7&Pfam_domain:PF10401&2.60.200.10&SMART_domains:SM01243&Superfamily_domains:SSF49879	cytoplasm [GO:0005737]; nucleoplasm [GO:0005654]; nucleus [GO:0005634]; RNA polymerase II regulatory region sequence-specific DNA binding [GO:0000977]; transcription factor activity, sequence-specific DNA binding [GO:0003700]; cellular response to interferon-gamma [GO:0071346]; cellular response to lipopolysaccharide [GO:0071222]; defense response to bacterium [GO:0042742]; defense response to pr…	liver/biliary,immune,neoplasm,hematopoietic,observed,mortality/aging,homeostasis	YES	11:17823782
6	35286960	G	A	2075.58	246	11	492	0.0223577	0	11	WD	0:0,11:0,0:0	.:.,GG-WUR-235_GG-WUR-179_GG-WUR-189_GG-WUR-177_GG-WUR-198_GG-WUR-197_GG-WUR-188_GG-WUR-224_GG-WUR-073_GG-WUR-213_GG-WUR-231:.,.:.	1851	57|8|0	missense_variant	MODERATE	INPP5A	ENSGALG00000010493	ENSGALT00000017087	12/16	-	865	865	289	D/N	Gac/Aac	-	deleterious(0)	1	3.60.10.10&Pfam_domain:PF03372&PTHR12997&PTHR12997:SF9&SMART_domains:SM00128&Superfamily_domains:SSF56219	hydrolase activity [GO:0016787]; phosphatidylinositol dephosphorylation [GO:0046856]intracellular [GO:0005622]; inositol-polyphosphate 5-phosphatase activity [GO:0004445]; inositol phosphate dephosphorylation [GO:0046855]; inositol phosphate-mediated signaling [GO:0048016]; phosphatidylinositol dephosphorylation [GO:0046856]hydrolase activity [GO:0016787]; phosphatidylinositol dephosphorylation […	mortality/aging	NO	6:35286960
18	5043001	C	T	1580.97	243	10	486	0.0205761	0	10	WD	0:0,10:0,0:0	.:.,GG-WUR-202_GG-WUR-192_GG-WUR-186_GG-WUR-217_GG-WUR-208_GG-WUR-126_GG-WUR-081_GG-WUR-204_GG-WUR-191_GG-WUR-215:.,.:.	1948	45|23|0	missense_variant	MODERATE	DER	ENSGALG00000002849	ENSGALT00000004493	5/8	-	456	436	146	R/W	Cgg/Tgg	-	deleterious(0.01)	-3.102	3.40.50.720&Pfam_domain:PF13561&PS00061&Superfamily_domains:SSF51735	cytoplasmic microtubule [GO:0005881]; extracellular exosome [GO:0070062]; nucleus [GO:0005634]; erythrulose reductase activity [GO:0047880]; L-xylulose reductase (NADP+) activity [GO:0050038]; oxidoreductase activity, acting on NAD(P)H, quinone or similar compound as acceptor [GO:0016655]; D-xylose metabolic process [GO:0042732]; glucose metabolic process [GO:0006006]; protein homotetramerization…	embryo,skeleton,growth/size/body,endocrine/exocrine,integument,homeostasis,cardiovascular,hearing/vestibular/ear,limbs/digits/tail,immune,neoplasm,mortality/aging,nervous system,craniofacial,vision/eye,cellular,reproductive,adipose,behavior,observed,muscle,hematopoietic,digestive/alimentary	NO	18:5043001
9	21065932	G	A	1612.05	245	10	490	0.0204082	0	10	W1	0:0,0:0,10:0	.:.,.:.,GG-WUR-105_GG-WUR-165_GG-WUR-266_GG-WUR-139_GG-WUR-103_GG-WUR-104_GG-WUR-022_GG-WUR-109_GG-WUR-093_GG-WUR-074:.	3875	57|13|0	missense_variant	MODERATE	BCHE	ENSGALG00000034860	ENSGALT00000052772	2/4	-	1384	1243	415	D/N	Gat/Aat	-	deleterious(0.02)	-3.078	3.40.50.1820&Pfam_domain:PF00135&PTHR11559&PTHR11559:SF215&Superfamily_domains:SSF53474	blood microparticle [GO:0072562]; endoplasmic reticulum [GO:0005783]; extracellular space [GO:0005615]; nuclear envelope lumen [GO:0005641]; acetylcholinesterase activity [GO:0003990]; carboxylic ester hydrolase activity [GO:0052689]	mortality/aging,endocrine/exocrine,behavior,homeostasis,digestive/alimentary	YES	9:21065932
18	6830991	G	A	3461.61	239	10	478	0.0209205	0	10	W1	0:0,0:0,10:0	.:.,.:.,GG-WUR-105_GG-WUR-165_GG-WUR-006_GG-WUR-047_GG-WUR-048_GG-WUR-103_GG-WUR-009_GG-WUR-169_GG-WUR-101_GG-WUR-109:.	2696	59|9|2	missense_variant	MODERATE	ERN1	ENSGALG00000003476	ENSGALT00000005503	22/22	-	2890	2873	958	S/F	tCt/tTt	-	deleterious(0.02)	-2.593	PTHR13954:SF7&PTHR13954	AIP1-IRE1 complex [GO:1990597]; integral component of endoplasmic reticulum membrane [GO:0030176]; IRE1-RACK1-PP2A complex [GO:1990630]; IRE1-TRAF2-ASK1 complex [GO:1990604]; mitochondrion [GO:0005739]; nuclear inner membrane [GO:0005637]; ADP binding [GO:0043531]; ATP binding [GO:0005524]; endoribonuclease activity [GO:0004521]; magnesium ion binding [GO:0000287]; protein serine/threonine kinase…	embryo,growth/size/body,liver/biliary,immune,hematopoietic,cellular,observed,mortality/aging,integument,homeostasis,cardiovascular	YES	18:6830991
14	8520318	T	A	1239.79	240	10	480	0.0208333	0	10	W1	0:0,0:0,10:0	.:.,.:.,GG-WUR-061_GG-WUR-242_GG-WUR-165_GG-WUR-161_GG-WUR-139_GG-WUR-269_GG-WUR-099_GG-WUR-101_GG-WUR-063_GG-WUR-074:.	1810	64|4|0	missense_variant	MODERATE	COQ7	ENSGALG00000006861	ENSGALT00000011107	5/6	-	878	596	199	E/V	gAg/gTg	-	deleterious(0.01)	1	MF_01658&PTHR11237&PTHR11237:SF4&Pfam_domain:PF03232	extrinsic component of mitochondrial inner membrane [GO:0031314]; metal ion binding [GO:0046872]; oxidoreductase activity, acting on paired donors, with incorporation or reduction of molecular oxygen, NAD(P)H as one donor, and incorporation of one atom of oxygen [GO:0016709]; ubiquinone biosynthetic process [GO:0006744]extrinsic component of mitochondrial inner membrane [GO:0031314]; nucleus [GO:…	embryo,growth/size/body,liver/biliary,cellular,mortality/aging,nervous system	YES	14:8520318
27	4181945	G	A	39.5981	227	10	454	0.0220264	0	10	W1	0:0,0:0,10:0	.:.,.:.,GG-WUR-064_GG-WUR-105_GG-WUR-014_GG-WUR-266_GG-WUR-268_GG-WUR-018_GG-WUR-057_GG-WUR-146_GG-WUR-015_GG-WUR-093:.	3059	61|7|0	missense_variant	MODERATE	NFE2L1	ENSGALG00000011937	ENSGALT00000036155	6/6	-	1877	1877	626	S/F	tCc/tTc	-	deleterious(0)	1	Low_complexity_(Seg):seg	cytoplasm [GO:0005737]; endoplasmic reticulum membrane [GO:0005789]; integral component of membrane [GO:0016021]; nucleus [GO:0005634]; transcription factor activity, sequence-specific DNA binding [GO:0003700]; transcription regulatory region sequence-specific DNA binding [GO:0000976]; cellular response to oxidative stress [GO:0034599]; positive regulation of transcription from RNA polymerase II …	embryo,growth/size/body,endocrine/exocrine,liver/biliary,immune,neoplasm,hematopoietic,cellular,mortality/aging,integument,homeostasis	NO	27:4181945
14	6368450	G	A	1229.44	247	9	494	0.0182186	0	9	WD_W1	0:0,8:0,1:0	.:.,GG-WUR-205_GG-WUR-182_GG-WUR-186_GG-WUR-217_GG-WUR-081_GG-WUR-188_GG-WUR-184_GG-WUR-225:.,GG-WUR-007:.	3048	59|1|3	missense_variant	MODERATE	PKD1	ENSGALG00000005714	ENSGALT00000009168	15/46	-	6482	6482	2005-11-01	T/I	aCc/aTc	-	tolerated(0.06)	-5.261	PROSITE_profiles:PS50093&2.60.40.670&TIGRFAM_domain:TIGR00864&SMART_domains:SM00089&Superfamily_domains:SSF49299	integral component of membrane [GO:0016021]; kidney development [GO:0001822]basolateral plasma membrane [GO:0016323]; cell surface [GO:0009986]; cytoplasm [GO:0005737]; extracellular exosome [GO:0070062]; integral component of membrane [GO:0016021]; membrane [GO:0016020]; motile cilium [GO:0031514]; nucleus [GO:0005634]; polycystin complex [GO:0002133]; calcium channel activity [GO:0005262]; bloo…	embryo,skeleton,craniofacial,endocrine/exocrine,liver/biliary,integument,homeostasis,cardiovascular,limbs/digits/tail,immune,neoplasm,mortality/aging,nervous system,growth/size/body,cellular,respiratory,reproductive,adipose,renal/urinary,no abnormal phenotype observed,muscle,hematopoietic,digestive/alimentary	YES	14:6368450
19	6472591	C	T	1217.45	244	9	488	0.0184426	0	9	WA	9:0,0:0,0:0	GG-WUR-262_GG-WUR-162_GG-WUR-130_GG-WUR-238_GG-WUR-236_GG-WUR-240_GG-WUR-251_GG-WUR-056_GG-WUR-237:.,.:.,.:.	5869	58|14|2	missense_variant	MODERATE	NCOR1	ENSGALG00000004477	ENSGALT00000007130	35/46	-	5213	5213	1738	R/Q	cGa/cAa	-	deleterious(0.01)	-3.655	PTHR13992&PTHR13992:SF5	membrane [GO:0016020]; Sin3 complex [GO:0016580]; spindle microtubule [GO:0005876]; transcriptional repressor complex [GO:0017053]; DNA binding [GO:0003677]; ligand-dependent nuclear receptor binding [GO:0016922]; thyroid hormone receptor binding [GO:0046966]; transcription corepressor activity [GO:0003714]; negative regulation of JNK cascade [GO:0046329]; negative regulation of production of miR…	embryo,nervous system,cellular,growth/size/body,adipose,endocrine/exocrine,liver/biliary,immune,hematopoietic,behavior,mortality/aging,integument,muscle,homeostasis,cardiovascular	YES	19:6472591
18	4780350	C	T	1604.34	248	9	496	0.0181452	0	9	W1	0:0,0:0,9:0	.:.,.:.,GG-WUR-124_GG-WUR-242_GG-WUR-020_GG-WUR-266_GG-WUR-095_GG-WUR-067_GG-WUR-099_GG-WUR-005_GG-WUR-058:.	356	60|1|0	missense_variant	MODERATE	ITGB4	ENSGALG00000002389	ENSGALT00000067275	15/21	-	2107	2107	703	D/N	Gac/Aac	-	tolerated(0.11)	-2.716	-	integrin complex [GO:0008305]; receptor activity [GO:0004872]; cell motility [GO:0048870]; cell-matrix adhesion [GO:0007160]; hemidesmosome assembly [GO:0031581]; integrin-mediated signaling pathway [GO:0007229]integrin complex [GO:0008305]; receptor activity [GO:0004872]; cell motility [GO:0048870]; cell-matrix adhesion [GO:0007160]; hemidesmosome assembly [GO:0031581]; integrin-mediated signali…	taste/olfaction,respiratory,cellular,immune,craniofacial,hearing/vestibular/ear,renal/urinary,vision/eye,behavior,cardiovascular,mortality/aging,integument,nervous system,growth/size/body,homeostasis,digestive/alimentary	NO	18:4780350
8	28824600	A	G	1163.15	194	9	388	0.0231959	0	9	WA_WD	8:0,1:0,0:0	GG-WUR-162_GG-WUR-069_GG-WUR-094_GG-WUR-053_GG-WUR-052_GG-WUR-035_GG-WUR-112_GG-WUR-237:.,GG-WUR-217:.,.:.	321	63|8|0	missense_variant	MODERATE	WLS	ENSGALG00000011238	ENSGALT00000058802	9/12	-	1178	1178	393	F/S	tTt/tCt	-	deleterious(0)	-2.123	Low_complexity_(Seg):seg&PTHR13449&Transmembrane_helices:TMhelix&Pfam_domain:PF06664	integral component of membrane [GO:0016021]; Wnt signaling pathway [GO:0016055]early endosome [GO:0005769]; integral component of membrane [GO:0016021]; plasma membrane [GO:0005886]; trans-Golgi network [GO:0005802]; anterior/posterior axis specification [GO:0009948]; exocrine pancreas development [GO:0031017]; hindbrain development [GO:0030902]; intracellular protein transport [GO:0006886]; meso…	embryo,respiratory,skeleton,hearing/vestibular/ear,craniofacial,adipose,endocrine/exocrine,limbs/digits/tail,immune,muscle,vision/eye,homeostasis,cellular,behavior,mortality/aging,integument,nervous system,growth/size/body,hematopoietic,digestive/alimentary	YES	8:28824600
5	18999065	A	G	96.8123	218	9	436	0.0206422	0	9	WA_WD_W1	4:0,1:0,4:0	GG-WUR-259_GG-WUR-088_GG-WUR-052_GG-WUR-237:.,GG-WUR-206:.,GG-WUR-064_GG-WUR-018_GG-WUR-062_GG-WUR-026:.	2368	59|3|0	missense_variant	MODERATE	CD44	ENSGALG00000039080	ENSGALT00000077825	11/15	-	1739	1318	440	T/A	Act/Gct	-	deleterious(0.04)	-1.435	PTHR10225&PTHR10225:SF6	integral component of membrane [GO:0016021]; hyaluronic acid binding [GO:0005540]; cell adhesion [GO:0007155]integral component of membrane [GO:0016021]; hyaluronic acid binding [GO:0005540]; cell adhesion [GO:0007155]	liver/biliary,muscle,skeleton,reproductive,respiratory,no abnormal phenotype observed,endocrine/exocrine,limbs/digits/tail,immune,renal/urinary,neoplasm,vision/eye,hematopoietic,cellular,behavior,mortality/aging,integument,digestive/alimentary,nervous system,homeostasis,cardiovascular	YES	5:18999065
2	108318814	C	T	1220.51	244	9	488	0.0184426	0	9	WD	0:0,9:0,0:0	.:.,GG-WUR-205_GG-WUR-220_GG-WUR-180_GG-WUR-201_GG-WUR-229_GG-WUR-137_GG-WUR-219_GG-WUR-213_GG-WUR-231:.,.:.	658	59|15|0	missense_variant	MODERATE	PRKDC	ENSGALG00000042469	ENSGALT00000065303	24/85	-	2881	2881	961	V/I	Gta/Ata	-	deleterious(0.01)	-0.857	PTHR11139:SF68&PTHR11139	nucleus [GO:0005634]; ATP binding [GO:0005524]; DNA binding [GO:0003677]; DNA-dependent protein kinase activity [GO:0004677]; double-strand break repair via nonhomologous end joining [GO:0006303]nucleus [GO:0005634]; ATP binding [GO:0005524]; DNA binding [GO:0003677]; DNA-dependent protein kinase activity [GO:0004677]; double-strand break repair via nonhomologous end joining [GO:0006303]	respiratory,growth/size/body,endocrine/exocrine,liver/biliary,immune,renal/urinary,neoplasm,hematopoietic,cellular,mortality/aging,integument,pigmentation,homeostasis,digestive/alimentary	YES	2:108318814
3	16330615	G	A	1896.94	247	9	494	0.0182186	0	9	WD	0:0,9:0,0:0	.:.,GG-WUR-235_GG-WUR-220_GG-WUR-221_GG-WUR-076_GG-WUR-201_GG-WUR-125_GG-WUR-077_GG-WUR-224_GG-WUR-195:.,.:.	4764	44|38|4	missense_variant	MODERATE	SLC8A1	ENSGALG00000008544	ENSGALT00000013920	1/10	-	1684	1684	562	A/T	Gca/Aca	-	deleterious(0)	1	PTHR11878:SF6&PTHR11878&TIGRFAM_domain:TIGR00845&Pfam_domain:PF03160&SMART_domains:SM00237&Superfamily_domains:SSF141072	integral component of plasma membrane [GO:0005887]; calcium:sodium antiporter activity [GO:0005432]; calcium ion import [GO:0070509]; cell communication [GO:0007154]; cellular sodium ion homeostasis [GO:0006883]; positive regulation of bone mineralization [GO:0030501]; positive regulation of the force of heart contraction [GO:0098735]; response to muscle stretch [GO:0035994]; sodium ion import [G…	embryo,muscle,craniofacial,endocrine/exocrine,cellular,mortality/aging,digestive/alimentary,growth/size/body,homeostasis,cardiovascular	NO	3:16330615
20	6407739	T	C	1892.27	243	8	486	0.0164609	0	8	WD	0:0,8:0,0:0	.:.,GG-WUR-177_GG-WUR-180_GG-WUR-076_GG-WUR-125_GG-WUR-073_GG-WUR-187_GG-WUR-084_GG-WUR-183:.,.:.	3516	57|2|0	missense_variant	MODERATE	PREX1	ENSGALG00000004621	ENSGALT00000007358	20/40	-	2216	2216	739	N/S	aAt/aGt	-	tolerated(0.16)	-3.793	PTHR22829:SF6&PTHR22829&2.30.42.10&SMART_domains:SM00228&Superfamily_domains:SSF50156	cytoplasm [GO:0005737]; cytosol [GO:0005829]; intracellular membrane-bounded organelle [GO:0043231]; plasma membrane [GO:0005886]; phospholipid binding [GO:0005543]; Rac guanyl-nucleotide exchange factor activity [GO:0030676]; G-protein coupled receptor signaling pathway [GO:0007186]; intracellular signal transduction [GO:0035556]; negative regulation of protein kinase activity [GO:0006469]; nega…	embryo,behavior,reproductive,growth/size/body,endocrine/exocrine,liver/biliary,immune,cellular,mortality/aging,nervous system,hematopoietic	YES	20:6407739
5	46538536	C	G	1193.76	212	8	424	0.0188679	0	8	WA	8:0,0:0,0:0	GG-WUR-114_GG-WUR-156_GG-WUR-253_GG-WUR-055_GG-WUR-175_GG-WUR-134_GG-WUR-155_GG-WUR-060:.,.:.,.:.	308	53|26|0	missense_variant	MODERATE	AK7	ENSGALG00000011093	ENSGALT00000018072	3/18	-	337	337	113	Q/E	Caa/Gaa	-	deleterious(0.03)	-2.545	PTHR23359&PTHR23359:SF105&Superfamily_domains:SSF51735	adenylate kinase activity [GO:0004017]; ATP binding [GO:0005524]; cytidylate kinase activity [GO:0004127]; nucleoside diphosphate kinase activity [GO:0004550]; nucleoside triphosphate biosynthetic process [GO:0009142]	respiratory,reproductive,craniofacial,immune,cellular,mortality/aging,nervous system,growth/size/body	YES	5:46538536
18	9868907	G	A	2171.06	217	8	434	0.0184332	0	8	W1	0:0,0:0,8:0	.:.,.:.,GG-WUR-172_GG-WUR-266_GG-WUR-048_GG-WUR-018_GG-WUR-091_GG-WUR-019_GG-WUR-023_GG-WUR-150:.	1287	58|8|0	missense_variant	MODERATE	USP36	ENSGALG00000037018	ENSGALT00000056706	15/20	-	2420	2420	807	R/H	cGt/cAt	-	deleterious(0.03)	-0.441	-	thiol-dependent ubiquitinyl hydrolase activity [GO:0036459]; protein deubiquitination [GO:0016579]; ubiquitin-dependent protein catabolic process [GO:0006511]	mortality/aging,skeleton,behavior	YES	18:9868907
18	9931974	A	T	2383.39	203	7	406	0.0172414	0	7	W1	0:0,0:0,7:0	.:.,.:.,GG-WUR-172_GG-WUR-048_GG-WUR-018_GG-WUR-091_GG-WUR-019_GG-WUR-023_GG-WUR-150:.	1725	42|18|0	missense_variant	MODERATE	SOCS3	ENSGALG00000027786	ENSGALT00000043264	2/2	-	719	578	193	Q/L	cAg/cTg	-	deleterious(0.03)	-3.081	PROSITE_profiles:PS50225&PTHR24369&PTHR24369:SF78&Pfam_domain:PF07525&SMART_domains:SM00253&SMART_domains:SM00969&Superfamily_domains:SSF158235	intracellular [GO:0005622]; JAK-STAT cascade [GO:0007259]; negative regulation of apoptotic process [GO:0043066]; negative regulation of inflammatory response [GO:0050728]; negative regulation of insulin receptor signaling pathway [GO:0046627]; negative regulation of tyrosine phosphorylation of Stat1 protein [GO:0042512]; negative regulation of tyrosine phosphorylation of Stat3 protein [GO:004251…	embryo,respiratory,skeleton,growth/size/body,adipose,endocrine/exocrine,liver/biliary,immune,hematopoietic,behavior,mortality/aging,integument,digestive/alimentary,cellular,homeostasis,cardiovascular	YES	18:9931974
27	5583572	C	T	2030.45	245	7	490	0.0142857	0	7	WA_W1	5:0,0:0,2:0	GG-WUR-068_GG-WUR-059_GG-WUR-050_GG-WUR-097_GG-WUR-056:.,.:.,GG-WUR-005_GG-WUR-245:.	1900	60|6|0	missense_variant	MODERATE	BRCA1	ENSGALG00000002781	ENSGALT00000004392	11/22	-	3802	3694	1232	G/S	Ggc/Agc	-	tolerated(0.15)	-2.591	PTHR13763&PTHR13763:SF0&PIRSF_domain:PIRSF001734	BRCA1-A complex [GO:0070531]; BRCA1-BARD1 complex [GO:0031436]; plasma membrane [GO:0005886]; DNA binding [GO:0003677]; ubiquitin-protein transferase activity [GO:0004842]; zinc ion binding [GO:0008270]; chordate embryonic development [GO:0043009]; double-strand break repair via homologous recombination [GO:0000724]; negative regulation of fatty acid biosynthetic process [GO:0045717]; negative re…	embryo,skeleton,growth/size/body,endocrine/exocrine,liver/biliary,integument,homeostasis,cardiovascular,limbs/digits/tail,immune,neoplasm,mortality/aging,pigmentation,cellular,nervous system,respiratory,reproductive,adipose,renal/urinary,behavior,no abnormal phenotype observed,muscle,hematopoietic,digestive/alimentary	YES	27:5583572
11	10226294	C	T	676.803	237	7	474	0.0147679	0	7	WD_W1	0:0,3:0,4:0	.:.,GG-WUR-235_GG-WUR-198_GG-WUR-185:.,GG-WUR-098_GG-WUR-095_GG-WUR-104_GG-WUR-093:.	325	51|21|5	missense_variant	MODERATE	SLC7A10	ENSGALG00000004729	ENSGALT00000007532	11/11	-	1503	1486	496	D/N	Gac/Aac	-	deleterious_low_confidence(0.01)	-1.838	-	integral component of plasma membrane [GO:0005887]; antiporter activity [GO:0015297]; L-serine transmembrane transporter activity [GO:0015194]; D-alanine transport [GO:0042941]; D-serine transport [GO:0042942]; L-serine transport [GO:0015825]integral component of membrane [GO:0016021]; amino acid transmembrane transporter activity [GO:0015171]	muscle,growth/size/body,behavior,mortality/aging,nervous system,homeostasis	YES	11:10226294
6	22501662	C	A	124.757	178	7	356	0.0196629	0	7	WD_W1	0:0,3:0,4:0	.:.,GG-WUR-203_GG-WUR-206_GG-WUR-219:.,GG-WUR-062_GG-WUR-025_GG-WUR-171_GG-WUR-007:.	207	52|15|0	missense_variant	MODERATE	PPRC1	ENSGALG00000020742	ENSGALT00000012011	4/13	-	2393	1730	577	S/I	aGc/aTc	-	deleterious(0.02)	-1.126	PTHR15528&PTHR15528:SF5	nucleus [GO:0005634]; ligand-dependent nuclear receptor transcription coactivator activity [GO:0030374]; nucleic acid binding [GO:0003676]; nucleotide binding [GO:0000166]; RNA polymerase II transcription cofactor activity [GO:0001104]; transcription factor binding [GO:0008134]; positive regulation of sequence-specific DNA binding transcription factor activity [GO:0051091]; positive regulation of…	embryo,mortality/aging	NO	6:22501662
2	116765908	G	A	871.046	241	7	482	0.0145228	0	7	WA	7:0,0:0,0:0	GG-WUR-156_GG-WUR-253_GG-WUR-159_GG-WUR-134_GG-WUR-056_GG-WUR-035_GG-WUR-237:.,.:.,.:.	2476	62|6|0	missense_variant	MODERATE	SULF1	ENSGALG00000039553	ENSGALT00000046842	16/20	-	2277	2150	717	R/H	cGc/cAc	-	deleterious(0.01)	1	Low_complexity_(Seg):seg&PIRSF_domain:PIRSF036665	catalytic activity [GO:0003824]; metabolic process [GO:0008152]cell surface [GO:0009986]; endoplasmic reticulum [GO:0005783]; Golgi apparatus [GO:0005794]; calcium ion binding [GO:0005509]; sulfuric ester hydrolase activity [GO:0008484]; metabolic process [GO:0008152]	mortality/aging,skeleton,cellular	YES	2:116765908
5	43312917	C	T	704.157	246	7	492	0.0142276	0	7	WA	7:0,0:0,0:0	GG-WUR-262_GG-WUR-261_GG-WUR-153_GG-WUR-122_GG-WUR-240_GG-WUR-135_GG-WUR-035:.,.:.,.:.	364	65|4|0	missense_variant&splice_region_variant	MODERATE	TTC8	ENSGALG00000010663	ENSGALT00000017348	3/15	-	302	302	101	A/V	gCt/gTt	-	deleterious(0.01)	1	PTHR23083&PTHR23083:SF39	BBSome [GO:0034464]; membrane [GO:0016020]; photoreceptor connecting cilium [GO:0032391]; axon guidance [GO:0007411]; camera-type eye photoreceptor cell differentiation [GO:0060219]; cilium assembly [GO:0060271]; establishment of planar polarity [GO:0001736]; establishment of protein localization to plasma membrane [GO:0090002]; fat cell differentiation [GO:0045444]; inner ear receptor stereocili…	taste/olfaction,respiratory,craniofacial,renal/urinary,vision/eye,cellular,mortality/aging,nervous system,growth/size/body	YES	5:43312917
12	17319022	G	T	1832.83	249	7	498	0.0140562	0	7	WD_W1	0:0,1:0,6:0	.:.,GG-WUR-184:.,GG-WUR-038_GG-WUR-087_GG-WUR-267_GG-WUR-007_GG-WUR-142_GG-WUR-015:.	1578	52|22|2	missense_variant	MODERATE	CHL1	ENSGALG00000037856	ENSGALT00000064311	10/26	-	1203	1089	363	E/D	gaG/gaT	-	deleterious(0.02)	1	PROSITE_profiles:PS50835&PTHR10489&PTHR10489:SF653&2.60.40.10&Pfam_domain:PF13927&SMART_domains:SM00409&SMART_domains:SM00408&Superfamily_domains:SSF48726	integral component of membrane [GO:0016021]integral component of membrane [GO:0016021]	taste/olfaction,embryo,respiratory,cellular,craniofacial,behavior,mortality/aging,nervous system,growth/size/body,cardiovascular	YES	12:17319022
4	57544075	TCACACACACAG	TCACACACACACAG	383.316	230	7	460	0.0152174	0	7	WD	0:0,7:0,0:0	.:.,GG-WUR-202_GG-WUR-192_GG-WUR-076_GG-WUR-178_GG-WUR-077_GG-WUR-080_GG-WUR-181:.,.:.	178	55|8|0	splice_donor_variant&frameshift_variant	HIGH	TIFA	ENSGALG00000012076	ENSGALT00000019728	2/3	-	178-188	178-188	60-63	HTHR/HTHTX	CACACACACAGg/CACACACACACAGg	-	-	NA	-	intracellular [GO:0005622]; I-kappaB kinase/NF-kappaB signaling [GO:0007249]	respiratory,hearing/vestibular/ear,growth/size/body,endocrine/exocrine,liver/biliary,immune,neoplasm,hematopoietic,mortality/aging,integument,homeostasis,digestive/alimentary	NO	4:57544075
6	24154587	G	A	1143.6	249	6	498	0.0120482	0	6	WD_W1	0:0,5:0,1:0	.:.,GG-WUR-235_GG-WUR-198_GG-WUR-200_GG-WUR-219_GG-WUR-079:.,GG-WUR-246:.	3198	49|23|0	missense_variant	MODERATE	COL17A1	ENSGALG00000029617	ENSGALT00000059091	18/57	-	1729	1549	517	P/S	Cca/Tca	-	tolerated(0.23)	-4.125	-	integral component of membrane [GO:0016021]; proteinaceous extracellular matrix [GO:0005578]integral component of membrane [GO:0016021]; proteinaceous extracellular matrix [GO:0005578]	behavior,reproductive,growth/size/body,immune,renal/urinary,cellular,mortality/aging,integument,pigmentation,hematopoietic	YES	6:24154587
27	5585359	A	G	1252.75	248	6	496	0.0120968	0	6	W1	0:0,0:0,6:0	.:.,.:.,GG-WUR-064_GG-WUR-151_GG-WUR-040_GG-WUR-104_GG-WUR-158_GG-WUR-015:.	1443	60|6|0	missense_variant	MODERATE	BRCA1	ENSGALG00000002781	ENSGALT00000004392	11/22	-	2015	1907	636	L/S	tTa/tCa	-	deleterious(0)	-3.726	PTHR13763&PTHR13763:SF0&PIRSF_domain:PIRSF001734	BRCA1-A complex [GO:0070531]; BRCA1-BARD1 complex [GO:0031436]; plasma membrane [GO:0005886]; DNA binding [GO:0003677]; ubiquitin-protein transferase activity [GO:0004842]; zinc ion binding [GO:0008270]; chordate embryonic development [GO:0043009]; double-strand break repair via homologous recombination [GO:0000724]; negative regulation of fatty acid biosynthetic process [GO:0045717]; negative re…	embryo,skeleton,growth/size/body,endocrine/exocrine,liver/biliary,integument,homeostasis,cardiovascular,limbs/digits/tail,immune,neoplasm,mortality/aging,pigmentation,cellular,nervous system,respiratory,reproductive,adipose,renal/urinary,behavior,observed,muscle,hematopoietic,digestive/alimentary	YES	27:5585359
5	58868345	G	C	954.808	233	6	466	0.0128755	0	6	WA	6:0,0:0,0:0	GG-WUR-162_GG-WUR-118_GG-WUR-090_GG-WUR-136_GG-WUR-164_GG-WUR-112:.,.:.,.:.	342	63|9|0	missense_variant	MODERATE	FANCM	ENSGALG00000031182	ENSGALT00000057113	23/23	-	5999	5999	2000	A/G	gCt/gGt	-	deleterious(0.04)	-2.234	PTHR14025&PTHR14025:SF20&Superfamily_domains:SSF47781	integral component of membrane [GO:0016021]; ATP binding [GO:0005524]; DNA binding [GO:0003677]; nuclease activity [GO:0004518]; DNA metabolic process [GO:0006259]	reproductive,endocrine/exocrine,liver/biliary,neoplasm,cellular,mortality/aging	YES	5:58868345
18	6726984	G	C	1036.84	231	6	462	0.012987	0	6	WA_W1	1:0,0:0,5:0	GG-WUR-143:.,.:.,GG-WUR-061_GG-WUR-165_GG-WUR-103_GG-WUR-101_GG-WUR-109:.	290	52|29|2	missense_variant	MODERATE	RHOT1	ENSGALG00000003397	ENSGALT00000063329	1/19	-	13	13	5	D/H	Gat/Cat	-	deleterious_low_confidence(0.04)	-0.49	PIRSF_domain:PIRSF037488&PROSITE_profiles:PS51423	integral component of mitochondrial outer membrane [GO:0031307]; calcium ion binding [GO:0005509]; GTP binding [GO:0005525]; GTPase activity [GO:0003924]; mitochondrion organization [GO:0007005]; small GTPase mediated signal transduction [GO:0007264]integral component of mitochondrial outer membrane [GO:0031307]; calcium ion binding [GO:0005509]; GTP binding [GO:0005525]; GTPase activity [GO:0003…	respiratory,skeleton,growth/size/body,cellular,behavior,mortality/aging,nervous system,homeostasis	NO	18:6726984
1	46721804	TGCGCAGCTTAGG	TG	515.78	229	6	458	0.0131004	0	6	WD	0:0,6:0,0:0	.:.,GG-WUR-203_GG-WUR-206_GG-WUR-180_GG-WUR-233_GG-WUR-213_GG-WUR-190:.,.:.	1564	64|5|0	frameshift_variant	HIGH	APAF1	ENSGALG00000011531	ENSGALT00000038231	3/26	-	452-463	420-431	140-144	LRSLG/LX	ctGCGCAGCTTAGGa/ctGa	-	-	NA	3.40.50.300&Pfam_domain:PF00931&PIRSF_domain:PIRSF037646&PTHR22845&PTHR22845:SF5&Superfamily_domains:SSF52540	apoptosome [GO:0043293]; extracellular exosome [GO:0070062]; nucleus [GO:0005634]; ADP binding [GO:0043531]; ATP binding [GO:0005524]; cysteine-type endopeptidase activator activity involved in apoptotic process [GO:0008656]; activation of cysteine-type endopeptidase activity involved in apoptotic process by cytochrome c [GO:0008635]; forebrain development [GO:0030900]; intrinsic apoptotic signal…	embryo,skeleton,craniofacial,endocrine/exocrine,homeostasis,cardiovascular,hearing/vestibular/ear,limbs/digits/tail,immune,neoplasm,mortality/aging,nervous system,growth/size/body,vision/eye,cellular,respiratory,reproductive,renal/urinary,behavior,observed,hematopoietic,digestive/alimentary	NO	1:46721804
4	66963942	T	C	591.701	238	5	476	0.0105042	0	5	WA	5:0,0:0,0:0	GG-WUR-261_GG-WUR-239_GG-WUR-092_GG-WUR-260_GG-WUR-129:.,.:.,.:.	1564	57|3|0	missense_variant	MODERATE	TEC	ENSGALG00000014124	ENSGALT00000022858	14/19	-	1375	1121	374	M/T	aTg/aCg	-	deleterious(0.03)	-3.468	PROSITE_profiles:PS50011&PTHR24418:SF219&PTHR24418&3.30.200.20&Pfam_domain:PF07714&SMART_domains:SM00219&Superfamily_domains:SSF56112	cytoskeleton [GO:0005856]; extrinsic component of cytoplasmic side of plasma membrane [GO:0031234]; ATP binding [GO:0005524]; non-membrane spanning protein tyrosine kinase activity [GO:0004715]; B cell receptor signaling pathway [GO:0050853]; cell differentiation [GO:0030154]; innate immune response [GO:0045087]; integrin-mediated signaling pathway [GO:0007229]; intracellular signal transduction …	embryo,pigmentation,behavior,immune,growth/size/body,adipose,endocrine/exocrine,liver/biliary,hearing/vestibular/ear,hematopoietic,cellular,mortality/aging,integument,nervous system,homeostasis	NO	4:66963942
5	37742076	G	A	1095.75	241	5	482	0.0103734	0	5	WD	0:0,5:0,0:0	.:.,GG-WUR-205_GG-WUR-186_GG-WUR-207_GG-WUR-083_GG-WUR-176:.,.:.	425	68|0|0	missense_variant	MODERATE	COQ6	ENSGALG00000010197	ENSGALT00000016576	3/12	-	408	408	136	M/I	atG/atA	-	deleterious(0.02)	-3.264	3.50.50.60&MF_03193&PTHR13789&PTHR13789:SF240&Superfamily_domains:SSF51905&TIGRFAM_domain:TIGR01988&TIGRFAM_domain:TIGR01989	cell projection [GO:0042995]; extrinsic component of mitochondrial inner membrane [GO:0031314]; Golgi apparatus [GO:0005794]; mitochondrion [GO:0005739]; FAD binding [GO:0071949]; monooxygenase activity [GO:0004497]; oxidoreductase activity, acting on paired donors, with incorporation or reduction of molecular oxygen, NAD(P)H as one donor, and incorporation of one atom of oxygen [GO:0016709]; oxi…	embryo,mortality/aging,growth/size/body,vision/eye	YES	5:37742076
26	3286786	G	C	685.975	247	5	494	0.0101215	0	5	WA	5:0,0:0,0:0	GG-WUR-163_GG-WUR-130_GG-WUR-039_GG-WUR-112_GG-WUR-237:.,.:.,.:.	969	65|1|0	missense_variant	MODERATE	DDX20	ENSGALG00000001504	ENSGALT00000040229	5/11	-	670	667	223	V/L	Gtg/Ctg	-	deleterious(0.01)	-2.717	PROSITE_profiles:PS51192&PTHR24031&PTHR24031:SF159&3.40.50.300&SMART_domains:SM00487&Superfamily_domains:SSF52540	cytosol [GO:0005829]; membrane [GO:0016020]; RNA polymerase II transcription repressor complex [GO:0090571]; SMN complex [GO:0032797]; SMN-Sm protein complex [GO:0034719]; ATP binding [GO:0005524]; ATP-dependent RNA helicase activity [GO:0004004]; nucleic acid binding [GO:0003676]; negative regulation of transcription from RNA polymerase II promoter [GO:0000122]; oogenesis [GO:0048477]; positive …	embryo,mortality/aging,reproductive,homeostasis,endocrine/exocrine	YES	26:3286786
18	4786724	G	A	1005.45	246	5	492	0.0101626	0	5	WA	5:0,0:0,0:0	GG-WUR-108_GG-WUR-068_GG-WUR-154_GG-WUR-238_GG-WUR-252:.,.:.,.:.	1190	60|1|0	missense_variant	MODERATE	ITGB4	ENSGALG00000002389	ENSGALT00000003760	26/39	-	2995	2995	999	L/F	Ctc/Ttc	-	deleterious(0)	-2.027	PTHR10082&PTHR10082:SF42&Pfam_domain:PF03160&SMART_domains:SM00237&Superfamily_domains:SSF141072	integrin complex [GO:0008305]; receptor activity [GO:0004872]; cell motility [GO:0048870]; cell-matrix adhesion [GO:0007160]; hemidesmosome assembly [GO:0031581]; integrin-mediated signaling pathway [GO:0007229]integrin complex [GO:0008305]; receptor activity [GO:0004872]; cell motility [GO:0048870]; cell-matrix adhesion [GO:0007160]; hemidesmosome assembly [GO:0031581]; integrin-mediated signali…	taste/olfaction,respiratory,cellular,immune,craniofacial,hearing/vestibular/ear,renal/urinary,vision/eye,behavior,cardiovascular,mortality/aging,integument,nervous system,growth/size/body,homeostasis,digestive/alimentary	NO	18:4786724
17	5090547	C	T	788.102	245	5	490	0.0102041	0	5	WA	5:0,0:0,0:0	GG-WUR-121_GG-WUR-153_GG-WUR-254_GG-WUR-134_GG-WUR-054:.,.:.,.:.	2422	47|12|0	missense_variant	MODERATE	CDK5RAP2	ENSGALG00000041102	ENSGALT00000071405	11/39	-	1384	1384	462	E/K	Gaa/Aaa	-	deleterious(0.03)	1	Low_complexity_(Seg):seg&PTHR13140:SF400&PTHR13140&Coiled-coils_(Ncoils):Coil	microtubule organizing center [GO:0005815]microtubule organizing center [GO:0005815]	skeleton,reproductive,growth/size/body,immune,neoplasm,vision/eye,cellular,mortality/aging,integument,nervous system,craniofacial,hematopoietic	YES	17:5090547
1	180364007	G	A	800.374	248	5	496	0.0100806	0	5	W1	0:0,0:0,5:0	.:.,.:.,GG-WUR-242_GG-WUR-095_GG-WUR-016_GG-WUR-040_GG-WUR-058:.	944	59|7|0	splice_donor_variant	HIGH	NPAT	ENSGALG00000017162	ENSGALT00000080652	-	17/18	-	-	-	-	-	-	-	NA	-	Cajal body [GO:0015030]; cytoplasm [GO:0005737]; Gemini of coiled bodies [GO:0097504]; transcription coactivator activity [GO:0003713]; transcription corepressor activity [GO:0003714]; positive regulation of transcription, DNA-templated [GO:0045893]; regulation of transcription involved in G1/S transition of mitotic cell cycle [GO:0000083]	mortality/aging	YES	1:180364007
3	23395177	CTTTTTTTTTTC	CTTTTTTTTTC	502.905	249	5	498	0.0100402	0	5	WA_WD_W1	1:0,2:0,2:0	GG-WUR-121:.,GG-WUR-207_GG-WUR-213:.,GG-WUR-264_GG-WUR-250:.	736	50|0|0	frameshift_variant	HIGH	PKDCC	ENSGALG00000042511	ENSGALT00000053290	1/6	-	36-46	36-46	2016-12-01	AFFFQ/AFFFX	gcTTTTTTTTTTCag/gcTTTTTTTTTCag	-	-	NA	PTHR26392:SF77&PTHR26392&Cleavage_site_(Signalp):SignalP-noTM	-	respiratory,skeleton,craniofacial,limbs/digits/tail,behavior,mortality/aging,growth/size/body,homeostasis,digestive/alimentary	NO	3:23395177
4	51931175	G	T	447.848	230	4	460	0.00869565	0	4	W1	0:0,0:0,4:0	.:.,.:.,GG-WUR-269_GG-WUR-062_GG-WUR-099_GG-WUR-074:.	641	45|12|0	missense_variant	MODERATE	CENPC	ENSGALG00000011683	ENSGALT00000019101	15/18	-	2186	2186	729	P/Q	cCa/cAa	-	deleterious(0)	-7.783	PTHR16684	kinetochore [GO:0000776]; centromeric DNA binding [GO:0019237]; kinetochore assembly [GO:0051382]condensed nuclear chromosome kinetochore [GO:0000778]; centromeric DNA binding [GO:0019237]; attachment of mitotic spindle microtubules to kinetochore [GO:0051315]; attachment of spindle microtubules to kinetochore involved in homologous chromosome segregation [GO:0051455]; kinetochore assembly [GO:00…	embryo,mortality/aging,growth/size/body,cellular	NO	4:51931175
13	13373639	CAAGAAGG	CAAGG	573.354	249	4	498	0.00803213	0	4	WD	0:0,4:0,0:0	.:.,GG-WUR-211_GG-WUR-188_GG-WUR-209_GG-WUR-185:.,.:.	737	58|4|0	inframe_deletion	MODERATE	FLT4	ENSGALG00000005802	ENSGALT00000009188	5/30	-	772-778	664-670	222-224	KKV/KV	AAGAAGGtc/AAGGtc	-	-	-7.646	2.60.40.10&Prints_domain:PR01835&PTHR24416&PTHR24416:SF49	integral component of plasma membrane [GO:0005887]; receptor complex [GO:0043235]; ATP binding [GO:0005524]; vascular endothelial growth factor-activated receptor activity [GO:0005021]; lung alveolus development [GO:0048286]; lymphangiogenesis [GO:0001946]; negative regulation of apoptotic process [GO:0043066]; positive regulation of endothelial cell migration [GO:0010595]; positive regulation of…	embryo,growth/size/body,adipose,liver/biliary,immune,hematopoietic,mortality/aging,integument,cardiovascular,homeostasis,digestive/alimentary	NO	13:13373639
14	13847526	G	A	404.067	248	4	496	0.00806452	0	4	WD_W1	0:0,3:0,1:0	.:.,GG-WUR-180_GG-WUR-126_GG-WUR-185:.,GG-WUR-057:.	596	60|2|0	missense_variant	MODERATE	TELO2	ENSGALG00000009297	ENSGALT00000015124	14/20	-	1298	1298	433	T/I	aCc/aTc	-	deleterious(0.03)	-5.058	PTHR15830&Pfam_domain:PF10193	-	mortality/aging,homeostasis,cellular	NO	14:13847526
10	2421528	C	A	374.531	219	4	438	0.00913242	0	4	WD	0:0,4:0,0:0	.:.,GG-WUR-138_GG-WUR-071_GG-WUR-072_GG-WUR-181:.,.:.	596	54|16|0	missense_variant	MODERATE	ARID3B	ENSGALG00000001376	ENSGALT00000002097	6/8	-	1416	1359	453	Q/H	caG/caT	-	deleterious(0.01)	-4.485	PROSITE_profiles:PS51486&PTHR15348&PTHR15348:SF3	nucleoplasm [GO:0005654]; nucleus [GO:0005634]; RNA polymerase II core promoter proximal region sequence-specific DNA binding [GO:0000978]; RNA polymerase II distal enhancer sequence-specific DNA binding [GO:0000980]; RNA polymerase II regulatory region sequence-specific DNA binding [GO:0000977]; transcriptional activator activity, RNA polymerase II core promoter proximal region sequence-specific…	embryo,craniofacial,immune,cellular,mortality/aging,nervous system,growth/size/body,hematopoietic,cardiovascular	YES	10:2421528
2	22508655	A	G	818.597	239	4	478	0.0083682	0	4	WD	0:0,4:0,0:0	.:.,GG-WUR-082_GG-WUR-070_GG-WUR-078_GG-WUR-187:.,.:.	3663	52|20|0	missense_variant	MODERATE	AKAP9	ENSGALG00000040724	ENSGALT00000071149	37/50	-	9244	9241	3081	R/G	Aga/Gga	-	tolerated(0.1)	-4.407	PTHR18937&PTHR18937:SF252	DNA binding [GO:0003677]; signal transduction [GO:0007165]	skeleton,reproductive,craniofacial,adipose,endocrine/exocrine,immune,homeostasis,mortality/aging,growth/size/body,hematopoietic	YES	2:22508655
2	22471986	G	C	150.245	218	4	436	0.00917431	0	4	WD	0:0,4:0,0:0	.:.,GG-WUR-082_GG-WUR-070_GG-WUR-078_GG-WUR-187:.,.:.	2839	52|20|0	missense_variant	MODERATE	AKAP9	ENSGALG00000040724	ENSGALT00000071149	15/50	-	4300	4297	1433	D/H	Gat/Cat	-	deleterious(0)	-4.329	-	DNA binding [GO:0003677]; signal transduction [GO:0007165]	skeleton,reproductive,craniofacial,adipose,endocrine/exocrine,immune,homeostasis,mortality/aging,growth/size/body,hematopoietic	YES	2:22471986
1	79110578	G	A	1938.44	244	6	488	0.0122951	2	4	WD	0:0,4:1,0:0	.:.,GG-WUR-206_GG-WUR-082_GG-WUR-233_GG-WUR-190:GG-WUR-196,.:.	826	66|6|0	missense_variant	MODERATE	WDR3	ENSGALG00000014791	ENSGALT00000023879	12/26	-	1544	1460	487	T/M	aCg/aTg	-	tolerated(0.06)	-3.247	PROSITE_profiles:PS50294&PTHR19853:SF0&PTHR19853&2.130.10.10&Pfam_domain:PF00400&SMART_domains:SM00320&Superfamily_domains:SSF50978	nuclear membrane [GO:0031965]; Pwp2p-containing subcomplex of 90S preribosome [GO:0034388]; small-subunit processome [GO:0032040]; poly(A) RNA binding [GO:0044822]; snoRNA binding [GO:0030515]; maturation of SSU-rRNA from tricistronic rRNA transcript (SSU-rRNA, 5.8S rRNA, LSU-rRNA) [GO:0000462]	mortality/aging	NO	1:79110578
4	34931985	C	T	230.522	193	4	386	0.0103627	0	4	W1	0:0,0:0,4:0	.:.,.:.,GG-WUR-046_GG-WUR-151_GG-WUR-243_GG-WUR-015:.	2723	57|1|0	missense_variant	MODERATE	WRN	ENSGALG00000040909	ENSGALT00000067559	2/37	-	91	91	31	R/C	Cgt/Tgt	-	deleterious(0)	-2.667	PTHR13710:SF87&PTHR13710	intracellular [GO:0005622]; 3'-5' exonuclease activity [GO:0008408]; ATP binding [GO:0005524]; ATP-dependent 3'-5' DNA helicase activity [GO:0043140]; nucleic acid binding [GO:0003676]; DNA recombination [GO:0006310]; DNA repair [GO:0006281]; DNA replication [GO:0006260]	skeleton,craniofacial,adipose,endocrine/exocrine,immune,neoplasm,homeostasis,cellular,mortality/aging,cardiovascular,growth/size/body,hematopoietic,digestive/alimentary	NO	4:34931985
14	8181977	G	A	516.056	246	4	492	0.00813008	0	4	W1	0:0,0:0,4:0	.:.,.:.,GG-WUR-172_GG-WUR-024_GG-WUR-091_GG-WUR-023:.	888	53|22|0	missense_variant	MODERATE	XYLT1	ENSGALG00000006757	ENSGALT00000039991	8/11	-	1582	1582	528	V/M	Gtg/Atg	-	deleterious(0.03)	-1.732	Pfam_domain:PF12529	membrane [GO:0016020]; acetylglucosaminyltransferase activity [GO:0008375]; protein xylosyltransferase activity [GO:0030158]; glycosaminoglycan biosynthetic process [GO:0006024]membrane [GO:0016020]; acetylglucosaminyltransferase activity [GO:0008375]; protein xylosyltransferase activity [GO:0030158]; glycosaminoglycan biosynthetic process [GO:0006024]membrane [GO:0016020]; acetylglucosaminyltran…	skeleton,craniofacial,limbs/digits/tail,immune,cellular,mortality/aging,growth/size/body,hematopoietic	NO	14:8181977
3	68996930	T	G	1018.28	228	4	456	0.00877193	0	4	WD	0:0,4:0,0:0	.:.,GG-WUR-235_GG-WUR-185_GG-WUR-070_GG-WUR-231:.,.:.	2922	62|6|2	missense_variant	MODERATE	PREP	ENSGALG00000015405	ENSGALT00000024849	13/15	-	2026	2026	676	S/A	Tct/Gct	-	deleterious(0.03)	-1.688	PTHR11757:SF14&PTHR11757&PS00708&3.40.50.1820&Pfam_domain:PF00326&Superfamily_domains:SSF53474	cytoplasm [GO:0005737]; membrane [GO:0016020]; nucleus [GO:0005634]; serine-type endopeptidase activity [GO:0004252]; serine-type exopeptidase activity [GO:0070008]; proteolysis [GO:0006508]	behavior,growth/size/body,adipose,liver/biliary,immune,renal/urinary,hematopoietic,cellular,mortality/aging,nervous system,homeostasis	YES	3:68996930
9	14987874	G	A	588.115	227	4	454	0.00881057	0	4	WD	0:0,4:0,0:0	.:.,GG-WUR-179_GG-WUR-195_GG-WUR-213_GG-WUR-079:.,.:.	2656	51|23|0	missense_variant	MODERATE	TFRC	ENSGALG00000007485	ENSGALT00000047272	6/17	-	805	805	269	A/T	Gct/Act	-	deleterious(0.05)	1	PTHR10404:SF26&PTHR10404&3.50.30.30&Pfam_domain:PF02225&Superfamily_domains:SSF52025	integral component of membrane [GO:0016021]; plasma membrane [GO:0005886]; transferrin receptor activity [GO:0004998]; cellular iron ion homeostasis [GO:0006879]; transferrin transport [GO:0033572]integral component of membrane [GO:0016021]; plasma membrane [GO:0005886]; transferrin receptor activity [GO:0004998]; cellular iron ion homeostasis [GO:0006879]; transferrin transport [GO:0033572]integ…	embryo,nervous system,growth/size/body,liver/biliary,immune,homeostasis,cellular,mortality/aging,integument,cardiovascular,hematopoietic,digestive/alimentary	YES	9:14987874
9	14986823	C	G	2197.5	226	4	452	0.00884956	0	4	WD	0:0,4:0,0:0	.:.,GG-WUR-179_GG-WUR-195_GG-WUR-213_GG-WUR-079:.,.:.	251	51|23|0	stop_gained	HIGH	TFRC	ENSGALG00000007485	ENSGALT00000012101	5/17	-	705	705	235	Y/*	taC/taG	-	-	NA	PTHR10404&PTHR10404:SF26	integral component of membrane [GO:0016021]; plasma membrane [GO:0005886]; transferrin receptor activity [GO:0004998]; cellular iron ion homeostasis [GO:0006879]; transferrin transport [GO:0033572]integral component of membrane [GO:0016021]; plasma membrane [GO:0005886]; transferrin receptor activity [GO:0004998]; cellular iron ion homeostasis [GO:0006879]; transferrin transport [GO:0033572]integ…	embryo,nervous system,growth/size/body,liver/biliary,immune,homeostasis,cellular,mortality/aging,integument,cardiovascular,hematopoietic,digestive/alimentary	YES	9:14986823
24	4359027	G	A	247.183	246	3	492	0.00609756	0	3	WA	3:0,0:0,0:0	GG-WUR-108_GG-WUR-054_GG-WUR-035:.,.:.,.:.	1909	64|3|0	missense_variant	MODERATE	KMT2A	ENSGALG00000006818	ENSGALT00000011022	23/36	-	5822	5822	1941	P/L	cCg/cTg	-	deleterious(0)	-9.253	PTHR22884:SF387&PTHR22884&PIRSF_domain:PIRSF010354	histone methyltransferase complex [GO:0035097]; DNA binding [GO:0003677]; histone methyltransferase activity (H3-K4 specific) [GO:0042800]; zinc ion binding [GO:0008270]; regulation of transcription, DNA-templated [GO:0006355]histone methyltransferase complex [GO:0035097]; DNA binding [GO:0003677]; histone methyltransferase activity (H3-K4 specific) [GO:0042800]; zinc ion binding [GO:0008270]; re…	embryo,liver/biliary,muscle,cellular,reproductive,immune,craniofacial,limbs/digits/tail,hearing/vestibular/ear,renal/urinary,neoplasm,homeostasis,behavior,observed,cardiovascular,mortality/aging,integument,nervous system,growth/size/body,hematopoietic,skeleton	NO	24:4359027
9	17571682	C	A	185.175	244	3	488	0.00614754	0	3	WD	0:0,3:0,0:0	.:.,GG-WUR-133_GG-WUR-202_GG-WUR-186:.,.:.	2368	53|20|2	missense_variant	MODERATE	MFN1	ENSGALG00000041873	ENSGALT00000055822	9/18	-	1315	1315	439	G/W	Ggg/Tgg	-	deleterious(0)	-7.551	PROSITE_profiles:PS51718&PTHR10465&PTHR10465:SF2&Superfamily_domains:SSF52540	integral component of membrane [GO:0016021]; mitochondrial outer membrane [GO:0005741]; GTP binding [GO:0005525]; GTPase activity [GO:0003924]; mitochondrial fusion [GO:0008053]integral component of membrane [GO:0016021]; mitochondrial outer membrane [GO:0005741]; GTP binding [GO:0005525]; GTPase activity [GO:0003924]; mitochondrial fusion [GO:0008053]	embryo,mortality/aging,growth/size/body,cellular,observed	NO	9:17571682
4	62191743	T	C	1486.48	247	3	494	0.00607287	0	3	WD	0:0,3:0,0:0	.:.,GG-WUR-185_GG-WUR-233_GG-WUR-181:.,.:.	5394	59|10|0	missense_variant	MODERATE	FAT1	ENSGALG00000013579	ENSGALT00000022100	1/26	-	2407	2387	796	Y/C	tAt/tGt	-	deleterious(0.01)	-7.534	PROSITE_profiles:PS50268&PTHR24026:SF42&PTHR24026&2.60.40.60&Pfam_domain:PF00028&SMART_domains:SM00112&Superfamily_domains:SSF49313	cell-cell junction [GO:0005911]; extracellular exosome [GO:0070062]; filopodium [GO:0030175]; focal adhesion [GO:0005925]; integral component of membrane [GO:0016021]; lamellipodium [GO:0030027]; nucleus [GO:0005634]; perinuclear region of cytoplasm [GO:0048471]; plasma membrane [GO:0005886]; calcium ion binding [GO:0005509]; actin filament organization [GO:0007015]; establishment or maintenance …	nervous system,craniofacial,renal/urinary,vision/eye,mortality/aging,pigmentation,growth/size/body,homeostasis	YES	4:62191743
1	51524116	A	G	496.373	249	3	498	0.0060241	0	3	WA	3:0,0:0,0:0	GG-WUR-119_GG-WUR-160_GG-WUR-097:.,.:.,.:.	276	56|0|20	missense_variant	MODERATE	TMPRSS6	ENSGALG00000012483	ENSGALT00000020394	15/17	-	2063	2063	688	E/G	gAa/gGa	-	deleterious(0)	-5.771	PROSITE_profiles:PS50240&PTHR24256&PTHR24256:SF257&2.40.10.10&Pfam_domain:PF00089&SMART_domains:SM00020&Superfamily_domains:SSF50494	extracellular space [GO:0005615]; integral component of membrane [GO:0016021]; plasma membrane [GO:0005886]; serine-type endopeptidase activity [GO:0004252]; cellular iron ion homeostasis [GO:0006879]; fibrinolysis [GO:0042730]; membrane protein proteolysis [GO:0033619]; negative regulation of BMP signaling pathway [GO:0030514]; negative regulation of transcription from RNA polymerase II promoter…	reproductive,growth/size/body,endocrine/exocrine,liver/biliary,immune,homeostasis,mortality/aging,integument,hematopoietic,digestive/alimentary	NO	1:51524116
9	17236801	C	A	534.55	236	3	472	0.00635593	0	3	WA	3:0,0:0,0:0	GG-WUR-159_GG-WUR-056_GG-WUR-052:.,.:.,.:.	752	64|4|0	missense_variant	MODERATE	CCDC39	ENSGALG00000021855	ENSGALT00000035401	18/20	-	2873	2570	857	P/H	cCt/cAt	-	deleterious(0)	-5.599	PTHR18962&PTHR18962:SF0	axoneme [GO:0005930]; cilium movement [GO:0003341]; cilium-dependent cell motility [GO:0060285]; determination of digestive tract left/right asymmetry [GO:0071907]; determination of liver left/right asymmetry [GO:0071910]; determination of pancreatic left/right asymmetry [GO:0035469]; epithelial cilium movement involved in determination of left/right asymmetry [GO:0060287]; flagellated sperm moti…	respiratory,skeleton,craniofacial,liver/biliary,immune,renal/urinary,homeostasis,cellular,mortality/aging,digestive/alimentary,growth/size/body,hematopoietic,cardiovascular	YES	9:17236801
3	108278046	C	T	2163.44	245	3	490	0.00612245	0	3	WD	0:0,3:0,0:0	.:.,GG-WUR-221_GG-WUR-081_GG-WUR-212:.,.:.	520	44|10|8	missense_variant	MODERATE	PKHD1	ENSGALG00000042136	ENSGALT00000069714	55/59	-	10207	10207	3403	R/W	Cgg/Tgg	-	-	-5.066	PTHR11915&PTHR11915:SF299	integral component of membrane [GO:0016021]; regulation of centrosome duplication [GO:0010824]	respiratory,growth/size/body,endocrine/exocrine,liver/biliary,immune,renal/urinary,cellular,observed,mortality/aging,cardiovascular,nervous system,hematopoietic,digestive/alimentary	YES	3:108278046
9	17482644	G	T	53.2204	220	3	440	0.00681818	0	3	WA	3:0,0:0,0:0	GG-WUR-159_GG-WUR-056_GG-WUR-052:.,.:.,.:.	968	60|10|0	missense_variant	MODERATE	MRPL47	ENSGALG00000013759	ENSGALT00000022351	1/7	-	55	35	12	R/L	cGg/cTg	-	deleterious(0)	-3.638	Low_complexity_(Seg):seg&PTHR21183:SF18&PTHR21183	mitochondrial large ribosomal subunit [GO:0005762]; structural constituent of ribosome [GO:0003735]; mitochondrial translation [GO:0032543]	mortality/aging	NO	9:17482644
9	17226144	G	A	1406.88	243	3	486	0.00617284	0	3	WA	3:0,0:0,0:0	GG-WUR-159_GG-WUR-056_GG-WUR-052:.,.:.,.:.	311	64|4|0	missense_variant	MODERATE	CCDC39	ENSGALG00000021855	ENSGALT00000035401	7/20	-	1091	788	263	R/Q	cGa/cAa	-	deleterious(0.01)	-3.392	PTHR18962&PTHR18962:SF0	axoneme [GO:0005930]; cilium movement [GO:0003341]; cilium-dependent cell motility [GO:0060285]; determination of digestive tract left/right asymmetry [GO:0071907]; determination of liver left/right asymmetry [GO:0071910]; determination of pancreatic left/right asymmetry [GO:0035469]; epithelial cilium movement involved in determination of left/right asymmetry [GO:0060287]; flagellated sperm moti…	respiratory,skeleton,craniofacial,liver/biliary,immune,renal/urinary,homeostasis,cellular,mortality/aging,digestive/alimentary,growth/size/body,hematopoietic,cardiovascular	YES	9:17226144
1	170105458	G	A	723.468	229	3	458	0.00655022	0	3	WD	0:0,3:0,0:0	.:.,GG-WUR-075_GG-WUR-229_GG-WUR-190:.,.:.	2814	59|10|0	missense_variant	MODERATE	INTS6	ENSGALG00000017018	ENSGALT00000027488	15/18	-	2009	2009	670	T/I	aCt/aTt	-	tolerated(0.06)	-2.882	PTHR12957&PTHR12957:SF23	-	mortality/aging	YES	1:170105458
3	35981960	G	A	698.361	243	3	486	0.00617284	0	3	WD	0:0,3:0,0:0	.:.,GG-WUR-228_GG-WUR-081_GG-WUR-077:.,.:.	345	54|4|0	missense_variant	MODERATE	PIGM	ENSGALG00000010768	ENSGALT00000017511	1/1	-	1062	1045	349	R/C	Cgt/Tgt	-	tolerated(0.08)	-2.858	Pfam_domain:PF05007&PTHR12886&PTHR12886:SF0	integral component of membrane [GO:0016021]; transferase activity, transferring hexosyl groups [GO:0016758]; GPI anchor biosynthetic process [GO:0006506]	embryo,mortality/aging,nervous system,vision/eye	YES	3:35981960
20	545012	C	T	701.874	246	3	492	0.00609756	0	3	W1	0:0,0:0,3:0	.:.,.:.,GG-WUR-014_GG-WUR-245_GG-WUR-150:.	1914	61|6|0	missense_variant	MODERATE	NCOA6	ENSGALG00000001182	ENSGALT00000001793	8/14	-	1848	1681	561	H/Y	Cat/Tat	-	deleterious_low_confidence(0)	-2.612	PTHR15690:SF0&PTHR15690	nucleus [GO:0005634]; transcription coactivator activity [GO:0003713]nucleus [GO:0005634]; transcription coactivator activity [GO:0003713]histone methyltransferase complex [GO:0035097]; transcription factor complex [GO:0005667]; hormone receptor binding [GO:0051427]; ligand-dependent nuclear receptor transcription coactivator activity [GO:0030374]; cellular response to DNA damage stimulus [GO:000…	embryo,liver/biliary,muscle,reproductive,pigmentation,craniofacial,endocrine/exocrine,limbs/digits/tail,nervous system,vision/eye,homeostasis,cellular,mortality/aging,integument,cardiovascular,growth/size/body,hematopoietic,digestive/alimentary	NO	20:545012
13	2592966	C	T	2210.59	240	3	480	0.00625	0	3	WA	3:0,0:0,0:0	GG-WUR-121_GG-WUR-162_GG-WUR-090:.,.:.,.:.	7823	61|8|0	missense_variant	MODERATE	CTNNA1	ENSGALG00000002447	ENSGALT00000003856	17/18	-	2397	1159	387	A/T	Gca/Aca	-	deleterious_low_confidence(0.01)	-0.444	Low_complexity_(Seg):seg	adherens junction [GO:0005912]; cytosol [GO:0005829]; actin filament organization [GO:0007015]; epithelial cell-cell adhesion [GO:0090136]actin cytoskeleton [GO:0015629]; adherens junction [GO:0005912]; cytosol [GO:0005829]; structural molecule activity [GO:0005198]; actin filament organization [GO:0007015]; epithelial cell-cell adhesion [GO:0090136]	embryo,limbs/digits/tail,nervous system,skeleton,pigmentation,craniofacial,endocrine/exocrine,liver/biliary,immune,vision/eye,hematopoietic,cellular,mortality/aging,integument,muscle,growth/size/body,homeostasis,cardiovascular	YES	13:2592966
3	40979600	C	T	735.505	248	3	496	0.00604839	0	3	W1	0:0,0:0,3:0	.:.,.:.,GG-WUR-064_GG-WUR-139_GG-WUR-269:.	483	52|19|2	missense_variant	MODERATE	DLL1	ENSGALG00000011182	ENSGALT00000037704	10/10	-	2203	2203	735	R/W	Cgg/Tgg	-	deleterious_low_confidence(0)	0.195	-	adherens junction [GO:0005912]; apical plasma membrane [GO:0016324]; cytoplasmic vesicle [GO:0031410]; integral component of membrane [GO:0016021]; membrane raft [GO:0045121]; calcium ion binding [GO:0005509]; astrocyte development [GO:0014002]; cerebellar molecular layer formation [GO:0021688]; cerebellar Purkinje cell layer structural organization [GO:0021693]; compartment pattern specification…	embryo,Germline,muscle,skeleton,hearing/vestibular/ear,growth/size/body,adipose,endocrine/exocrine,limbs/digits/tail,immune,renal/urinary,digestive/alimentary,hematopoietic,behavior,observed,mortality/aging,nervous system,cellular,homeostasis,cardiovascular	YES	3:40979600
4	78969238	T	C	347.336	245	2	490	0.00408163	0	2	WD	0:0,2:0,0:0	.:.,GG-WUR-176_GG-WUR-181:.,.:.	674	55|3|6	missense_variant	MODERATE	SLC2A9	ENSGALG00000014971	ENSGALT00000032056	4/12	-	410	410	137	M/T	aTg/aCg	-	deleterious(0.01)	-4.914	1.20.1250.20&Pfam_domain:PF00083&PROSITE_profiles:PS50850&PTHR23503&PTHR23503:SF35&Superfamily_domains:SSF103473&TIGRFAM_domain:TIGR00879	integral component of membrane [GO:0016021]; plasma membrane [GO:0005886]; glucose transmembrane transporter activity [GO:0005355]; urate transmembrane transporter activity [GO:0015143]; urate metabolic process [GO:0046415]	growth/size/body,adipose,liver/biliary,immune,renal/urinary,behavior,mortality/aging,digestive/alimentary,homeostasis,cardiovascular	YES	4:78969238
2	1115520	G	A	166.464	248	2	496	0.00403226	0	2	W1	0:0,0:0,2:0	.:.,.:.,GG-WUR-100_GG-WUR-148:.	4923	45|23|3	missense_variant	MODERATE	AQP1	ENSGALG00000005209	ENSGALT00000008364	1/4	-	405	343	115	G/R	Gga/Aga	-	tolerated(0.06)	-4.762	1.20.1080.10&Pfam_domain:PF00230&PTHR19139&PTHR19139:SF161&Superfamily_domains:SSF81338&TIGRFAM_domain:TIGR00861	apical plasma membrane [GO:0016324]; axon [GO:0030424]; basal plasma membrane [GO:0009925]; basolateral plasma membrane [GO:0016323]; brush border [GO:0005903]; caveola [GO:0005901]; extracellular exosome [GO:0070062]; integral component of plasma membrane [GO:0005887]; symbiont-containing vacuole [GO:0020003]; ammonium transmembrane transporter activity [GO:0008519]; carbon dioxide transmembrane…	respiratory,skeleton,reproductive,growth/size/body,endocrine/exocrine,renal/urinary,behavior,mortality/aging,homeostasis,cardiovascular	NO	2:1115520
15	5980969	T	C	104.443	222	2	444	0.0045045	0	2	W1	0:0,0:0,2:0	.:.,.:.,GG-WUR-100_GG-WUR-150:.	579	64|2|0	missense_variant	MODERATE	KNTC1	ENSGALG00000004515	ENSGALT00000066030	52/52	-	5666	5666	1889	L/P	cTg/cCg	-	deleterious(0)	-4.328	PTHR15688&PTHR15688:SF1	actin cytoskeleton [GO:0015629]; cytoplasm [GO:0005737]; kinetochore microtubule [GO:0005828]; plasma membrane [GO:0005886]; RZZ complex [GO:1990423]; spindle pole [GO:0000922]; mitotic cell cycle checkpoint [GO:0007093]	limbs/digits/tail,mortality/aging,homeostasis,behavior	NO	15:5980969
11	6638267	C	T	148.05	239	2	478	0.0041841	0	2	WD	0:0,2:0,0:0	.:.,GG-WUR-193_GG-WUR-080:.,.:.	3471	56|19|0	missense_variant	MODERATE	BRD7	ENSGALG00000003786	ENSGALT00000006006	10/17	-	1236	1151	384	T/M	aCg/aTg	-	deleterious(0)	-3.687	PTHR22881:SF12&PTHR22881&Pfam_domain:PF12024	BAF-type complex [GO:0090544]; cytoplasm [GO:0005737]; transcription coactivator activity [GO:0003713]; transcription corepressor activity [GO:0003714]; transcription regulatory region DNA binding [GO:0044212]; negative regulation of cell proliferation [GO:0008285]; negative regulation of G1/S transition of mitotic cell cycle [GO:2000134]; negative regulation of transcription, DNA-templated [GO:0…	growth/size/body,limbs/digits/tail,behavior,mortality/aging,integument,nervous system,cardiovascular	YES	11:6638267
27	3195518	G	A	247.758	236	2	472	0.00423729	0	2	WD	0:0,2:0,0:0	.:.,GG-WUR-235_GG-WUR-185:.,.:.	499	50|14|4	missense_variant	MODERATE	ITGA3	ENSGALG00000032702	ENSGALT00000053045	5/26	-	780	646	216	R/W	Cgg/Tgg	-	deleterious(0)	-3.536	3nigC00&Superfamily_domains:SSF69318&PROSITE_profiles:PS51470&PTHR23220:SF89&PTHR23220	integrin complex [GO:0008305]; cell adhesion [GO:0007155]; integrin-mediated signaling pathway [GO:0007229]integral component of membrane [GO:0016021]	respiratory,immune,renal/urinary,behavior,mortality/aging,integument,nervous system,homeostasis,cardiovascular	NO	27:3195518
5	23521803	C	T	573.029	232	2	464	0.00431034	0	2	W1	0:0,0:0,2:0	.:.,.:.,GG-WUR-095_GG-WUR-057:.	3740	61|11|0	missense_variant	MODERATE	AMBRA1	ENSGALG00000008358	ENSGALT00000038392	6/12	-	1781	1781	594	T/M	aCg/aTg	-	deleterious_low_confidence(0)	-3.423	PTHR22874:SF1&PTHR22874	axoneme [GO:0005930]; cytosol [GO:0005829]; intracellular membrane-bounded organelle [GO:0043231]; phagocytic vesicle [GO:0045335]; autophagy [GO:0006914]; negative regulation of cell proliferation [GO:0008285]; negative regulation of neuron apoptotic process [GO:0043524]; neural tube development [GO:0021915]	embryo,mortality/aging,nervous system,cellular	NO	5:23521803
1	172700987	A	G	284.963	247	2	494	0.00404858	0	2	W1	0:0,0:0,2:0	.:.,.:.,GG-WUR-157_GG-WUR-151:.	1818	42|21|0	missense_variant	MODERATE	DCLK1	ENSGALG00000041263	ENSGALT00000082498	2/18	-	599	328	110	T/A	Aca/Gca	-	tolerated(0.06)	-3.294	PROSITE_profiles:PS50309&PTHR24347:SF122&PTHR24347&1mfwA00&Pfam_domain:PF03607&SMART_domains:SM00537&Superfamily_domains:SSF89837	intracellular [GO:0005622]; ATP binding [GO:0005524]; protein serine/threonine kinase activity [GO:0004674]; intracellular signal transduction [GO:0035556]	mortality/aging,nervous system,homeostasis,cellular	YES	1:172700987
26	5028198	T	C	693.827	220	2	440	0.00454545	0	2	W1	0:0,0:0,2:0	.:.,.:.,GG-WUR-014_GG-WUR-266:.	1633	63|2|0	missense_variant	MODERATE	BYSL	ENSGALG00000003467	ENSGALT00000005492	4/6	-	791	791	264	M/T	aTg/aCg	-	tolerated(0.2)	-3.145	PTHR12821&PTHR12821:SF0&Pfam_domain:PF05291	apical part of cell [GO:0045177]; cytoplasm [GO:0005737]; membrane [GO:0016020]; nucleolus [GO:0005730]; poly(A) RNA binding [GO:0044822]; cell proliferation [GO:0008283]; maturation of SSU-rRNA from tricistronic rRNA transcript (SSU-rRNA, 5.8S rRNA, LSU-rRNA) [GO:0000462]	mortality/aging	YES	26:5028198
6	24164595	T	C	430.217	243	2	486	0.00411523	0	2	WD_W1	0:0,1:0,1:0	.:.,GG-WUR-070:.,GG-WUR-267:.	363	49|23|0	missense_variant	MODERATE	COL17A1	ENSGALG00000029617	ENSGALT00000059091	6/57	-	551	371	124	K/R	aAa/aGa	-	deleterious(0.02)	-2.889	-	integral component of membrane [GO:0016021]; proteinaceous extracellular matrix [GO:0005578]integral component of membrane [GO:0016021]; proteinaceous extracellular matrix [GO:0005578]	behavior,reproductive,growth/size/body,immune,renal/urinary,cellular,mortality/aging,integument,pigmentation,hematopoietic	YES	6:24164595
7	7096009	T	C	220.734	237	2	474	0.00421941	0	2	WD_W1	0:0,1:0,1:0	.:.,GG-WUR-079:.,GG-WUR-265:.	1565	56|8|0	missense_variant	MODERATE	PCNT	ENSGALG00000007021	ENSGALT00000011356	23/49	-	4399	4399	1467	S/G	Agc/Ggc	-	-	-2.662	PTHR18937&PTHR18937:SF204	centriolar satellite [GO:0034451]; centriole [GO:0005814]; membrane [GO:0016020]; cilium assembly [GO:0060271]; mitotic spindle organization [GO:0007052]; positive regulation of intracellular protein transport [GO:0090316]	embryo,nervous system,skeleton,craniofacial,limbs/digits/tail,renal/urinary,respiratory,vision/eye,cellular,mortality/aging,cardiovascular,growth/size/body,homeostasis,digestive/alimentary	NO	7:7096009
20	10239951	C	A	137.64	247	2	494	0.00404858	0	2	W1	0:0,0:0,2:0	.:.,.:.,GG-WUR-017_GG-WUR-013:.	1417	62|4|0	missense_variant	MODERATE	TPX2	ENSGALG00000006267	ENSGALT00000010129	3/16	-	674	287	96	S/Y	tCc/tAc	-	deleterious(0.01)	-2.588	PTHR14326:SF9&PTHR14326	microtubule [GO:0005874]; spindle [GO:0005819]; activation of protein kinase activity [GO:0032147]; regulation of mitotic spindle organization [GO:0060236]	embryo,reproductive,endocrine/exocrine,immune,neoplasm,cellular,mortality/aging,nervous system,hematopoietic	NO	20:10239951
7	21567298	C	T	286.225	237	2	474	0.00421941	0	2	WD_W1	0:0,1:0,1:0	.:.,GG-WUR-188:.,GG-WUR-064:.	1876	58|6|0	missense_variant	MODERATE	TANK	ENSGALG00000011131	ENSGALT00000033125	9/9	-	1536	1415	472	R/Q	cGg/cAg	-	deleterious(0)	-2.111	PTHR15249:SF0&PTHR15249	cytoplasm [GO:0005737]; protein complex [GO:0043234]; deubiquitinase activator activity [GO:0035800]; thiol-dependent ubiquitin-specific protease activity [GO:0004843]; cellular response to DNA damage stimulus [GO:0006974]; cellular response to interleukin-1 [GO:0071347]; cellular response to ionizing radiation [GO:0071479]; cellular response to tumor necrosis factor [GO:0071356]; I-kappaB kinase…	respiratory,liver/biliary,immune,renal/urinary,homeostasis,mortality/aging,integument,hematopoietic,cardiovascular	NO	7:21567298
7	21573823	T	A	235.532	237	2	474	0.00421941	0	2	WD	0:0,2:0,0:0	.:.,GG-WUR-241_GG-WUR-132:.,.:.	1736	58|6|0	missense_variant	MODERATE	TANK	ENSGALG00000011131	ENSGALT00000033125	7/9	-	801	680	227	K/M	aAg/aTg	-	deleterious(0.02)	-1.77	PTHR15249:SF0&PTHR15249&Pfam_domain:PF12845	cytoplasm [GO:0005737]; protein complex [GO:0043234]; deubiquitinase activator activity [GO:0035800]; thiol-dependent ubiquitin-specific protease activity [GO:0004843]; cellular response to DNA damage stimulus [GO:0006974]; cellular response to interleukin-1 [GO:0071347]; cellular response to ionizing radiation [GO:0071479]; cellular response to tumor necrosis factor [GO:0071356]; I-kappaB kinase…	respiratory,liver/biliary,immune,renal/urinary,homeostasis,mortality/aging,integument,hematopoietic,cardiovascular	NO	7:21573823
3	16036704	G	C	642.616	247	2	494	0.00404858	0	2	WD	0:0,2:0,0:0	.:.,GG-WUR-076_GG-WUR-077:.,.:.	1836	67|0|0	missense_variant	MODERATE	POLR1B	ENSGALG00000032273	ENSGALT00000051780	15/15	-	3125	3125	1042	S/T	aGc/aCc	-	deleterious(0.03)	-0.805	PTHR20856:SF5&PTHR20856&Pfam_domain:PF04560&Superfamily_domains:SSF64484	nucleus [GO:0005634]; DNA binding [GO:0003677]; DNA-directed RNA polymerase activity [GO:0003899]; ribonucleoside binding [GO:0032549]; transcription, DNA-templated [GO:0006351]	embryo,mortality/aging,cellular	YES	3:16036704
2	41160730	C	T	179.164	237	2	474	0.00421941	0	2	WD	0:0,2:0,0:0	.:.,GG-WUR-179_GG-WUR-185:.,.:.	4976	58|7|0	missense_variant	MODERATE	SNRK	ENSGALG00000039920	ENSGALT00000046710	5/5	-	2214	2188	730	V/M	Gtg/Atg	-	deleterious_low_confidence(0)	-0.609	-	ATP binding [GO:0005524]; protein kinase activity [GO:0004672]	mortality/aging,muscle,homeostasis,cardiovascular	NO	2:41160730
8	1325271	C	T	279.962	224	2	448	0.00446429	0	2	WD	0:0,2:0,0:0	.:.,GG-WUR-076_GG-WUR-077:.,.:.	2070	60|8|0	missense_variant&splice_region_variant	MODERATE	GPSM2	ENSGALG00000002090	ENSGALT00000003258	7/15	-	1514	688	230	R/C	Cgt/Tgt	-	deleterious(0)	1	PROSITE_profiles:PS50293&PROSITE_profiles:PS50005&PTHR10098&PTHR10098:SF100&Pfam_domain:PF13176&1.25.40.10&SMART_domains:SM00028&Superfamily_domains:SSF48452	apical part of cell [GO:0045177]; cell cortex [GO:0005938]; mitotic spindle pole [GO:0097431]; GDP-dissociation inhibitor activity [GO:0005092]; establishment of mitotic spindle orientation [GO:0000132]; lung epithelial cell differentiation [GO:0060487]; maintenance of centrosome location [GO:0051661]; mitotic spindle organization [GO:0007052]	behavior,hearing/vestibular/ear,vision/eye,cellular,mortality/aging,nervous system,hematopoietic	NO	8:1325271
6	24168946	T	C	125.269	244	2	488	0.00409836	0	2	WD	0:0,2:0,0:0	.:.,GG-WUR-192_GG-WUR-183:.,.:.	3813	49|23|0	missense_variant	MODERATE	COL17A1	ENSGALG00000029617	ENSGALT00000059091	2/57	-	205	25	9	R/G	Agg/Ggg	-	deleterious_low_confidence(0.01)	1	-	integral component of membrane [GO:0016021]; proteinaceous extracellular matrix [GO:0005578]integral component of membrane [GO:0016021]; proteinaceous extracellular matrix [GO:0005578]	behavior,reproductive,growth/size/body,immune,renal/urinary,cellular,mortality/aging,integument,pigmentation,hematopoietic	YES	6:24168946
8	1325271	C	T	279.962	224	2	448	0.00446429	0	2	WD	0:0,2:0,0:0	.:.,GG-WUR-076_GG-WUR-077:.,.:.	2070	60|8|0	missense_variant&splice_region_variant	MODERATE	GPSM2	ENSGALG00000002090	ENSGALT00000003258	7/15	-	1514	688	230	R/C	Cgt/Tgt	-	deleterious(0)	1	PROSITE_profiles:PS50293&PROSITE_profiles:PS50005&PTHR10098&PTHR10098:SF100&Pfam_domain:PF13176&1.25.40.10&SMART_domains:SM00028&Superfamily_domains:SSF48452	apical part of cell [GO:0045177]; cell cortex [GO:0005938]; mitotic spindle pole [GO:0097431]; GDP-dissociation inhibitor activity [GO:0005092]; establishment of mitotic spindle orientation [GO:0000132]; lung epithelial cell differentiation [GO:0060487]; maintenance of centrosome location [GO:0051661]; mitotic spindle organization [GO:0007052]	behavior,hearing/vestibular/ear,vision/eye,cellular,mortality/aging,nervous system,hematopoietic	NO	8:1325271
15	131831	T	C	329.15	236	2	472	0.00423729	0	2	WD	0:0,2:0,0:0	.:.,GG-WUR-230_GG-WUR-176:.,.:.	1994	55|29|0	missense_variant	MODERATE	PI4KA	ENSGALG00000040756	ENSGALT00000057304	33/56	-	3728	3728	1243	I/T	aTa/aCa	-	deleterious(0.02)	1	-	intracellular [GO:0005622]; kinase activity [GO:0016301]; phosphatidylinositol phosphorylation [GO:0046854]; phosphatidylinositol-mediated signaling [GO:0048015]intracellular [GO:0005622]; kinase activity [GO:0016301]; phosphatidylinositol phosphorylation [GO:0046854]; phosphatidylinositol-mediated signaling [GO:0048015]intracellular [GO:0005622]; kinase activity [GO:0016301]; phosphatidylinosito…	growth/size/body,endocrine/exocrine,immune,behavior,mortality/aging,integument,hematopoietic,digestive/alimentary	YES	15:131831
4	8622456	ACAAA	ACAAAGCATA	1179.11	204	2	408	0.00490196	0	2	WA	2:0,0:0,0:0	GG-WUR-257_GG-WUR-035:.,.:.,.:.	218	45|38|0	splice_donor_variant&frameshift_variant	HIGH	CHM	ENSGALG00000006906	ENSGALT00000081446	6/14	-	765-769	765-769	255-257	PQN/PQSIX	ccACAAAac/ccACAAAGCATAac	-	-	NA	PTHR11787&PTHR11787:SF12&3.30.519.10&Superfamily_domains:SSF51905	Rab-protein geranylgeranyltransferase complex [GO:0005968]; GDP-dissociation inhibitor activity [GO:0005092]; oxidoreductase activity [GO:0016491]; intracellular protein transport [GO:0006886]; protein geranylgeranylation [GO:0018344]; small GTPase mediated signal transduction [GO:0007264]Rab-protein geranylgeranyltransferase complex [GO:0005968]; GDP-dissociation inhibitor activity [GO:0005092];…	embryo,nervous system,skeleton,reproductive,behavior,growth/size/body,liver/biliary,immune,vision/eye,hematopoietic,cellular,observed,mortality/aging,pigmentation,homeostasis,cardiovascular	NO	4:8622456
1	13788459	GTTTTTTTA	GTTTTTTTTTA	749.093	238	2	476	0.00420168	0	2	W1	0:0,0:0,2:0	.:.,.:.,GG-WUR-127_GG-WUR-057:.	2644	64|2|0	splice_acceptor_variant	HIGH	KMT2E	ENSGALG00000008167	ENSGALT00000013259	-	5/21	-	-	-	-	-	-	-	NA	-	zinc ion binding [GO:0008270]zinc ion binding [GO:0008270]zinc ion binding [GO:0008270]	reproductive,growth/size/body,adipose,endocrine/exocrine,immune,vision/eye,hematopoietic,cellular,mortality/aging,homeostasis	YES	1:13788459
4	8622456	ACAAA	ACAAAGCATA	1179.11	204	2	408	0.00490196	0	2	WA	2:0,0:0,0:0	GG-WUR-257_GG-WUR-035:.,.:.,.:.	218	45|38|0	splice_donor_variant&frameshift_variant	HIGH	CHM	ENSGALG00000006906	ENSGALT00000081446	6/14	-	765-769	765-769	255-257	PQN/PQSIX	ccACAAAac/ccACAAAGCATAac	-	-	NA	PTHR11787&PTHR11787:SF12&3.30.519.10&Superfamily_domains:SSF51905	Rab-protein geranylgeranyltransferase complex [GO:0005968]; GDP-dissociation inhibitor activity [GO:0005092]; oxidoreductase activity [GO:0016491]; intracellular protein transport [GO:0006886]; protein geranylgeranylation [GO:0018344]; small GTPase mediated signal transduction [GO:0007264]Rab-protein geranylgeranyltransferase complex [GO:0005968]; GDP-dissociation inhibitor activity [GO:0005092];…	embryo,nervous system,skeleton,reproductive,behavior,growth/size/body,liver/biliary,immune,vision/eye,hematopoietic,cellular,observed,mortality/aging,pigmentation,homeostasis,cardiovascular	NO	4:8622456
5	40875914	TTT	TTGTATATTGTA	60.1225	242	2	484	0.00413223	0	2	W1	0:0,0:0,2:0	.:.,.:.,GG-WUR-161_GG-WUR-102:.	3272	61|8|0	splice_donor_variant&intron_variant	HIGH	GTF2A1	ENSGALG00000010576	ENSGALT00000017211	-	8/8	-	-	-	-	-	-	-	NA	-	cytoplasm [GO:0005737]; transcription factor TFIIA complex [GO:0005672]; transcription factor TFIID complex [GO:0005669]; DNA binding [GO:0003677]; transcription initiation from RNA polymerase II promoter [GO:0006367]	skeleton,reproductive,endocrine/exocrine,cellular,behavior,mortality/aging	NO	5:40875914
11	6635529	GTTTTTTTA	GTTTTTTA	678.35	242	2	484	0.00413223	0	2	WD	0:0,2:0,0:0	.:.,GG-WUR-193_GG-WUR-080:.,.:.	2575	56|19|0	splice_acceptor_variant&intron_variant	HIGH	BRD7	ENSGALG00000003786	ENSGALT00000006006	-	6/16	-	-	-	-	-	-	-	NA	-	BAF-type complex [GO:0090544]; cytoplasm [GO:0005737]; transcription coactivator activity [GO:0003713]; transcription corepressor activity [GO:0003714]; transcription regulatory region DNA binding [GO:0044212]; negative regulation of cell proliferation [GO:0008285]; negative regulation of G1/S transition of mitotic cell cycle [GO:2000134]; negative regulation of transcription, DNA-templated [GO:0…	growth/size/body,limbs/digits/tail,behavior,mortality/aging,integument,nervous system,cardiovascular	NO	11:6635529
19	4482616	GCACCACC	GCACC	99.6163	242	1	484	0.00206612	0	1	W1	0:0,0:0,1:0	.:.,.:.,GG-WUR-057:.	2011	62|9|0	inframe_deletion	MODERATE	LIG3	ENSGALG00000002288	ENSGALT00000003599	14/20	-	2146-2152	2127-2133	709-711	LVV/LV	ttGGTGGTG/ttGGTG	-	-	-12.447	PROSITE_profiles:PS50160&PTHR10459&PTHR10459:SF11&2.40.50.140&TIGRFAM_domain:TIGR00574&Superfamily_domains:SSF50249	mitochondrion [GO:0005739]; nucleus [GO:0005634]; ATP binding [GO:0005524]; DNA binding [GO:0003677]; DNA ligase (ATP) activity [GO:0003910]; zinc ion binding [GO:0008270]; base-excision repair, DNA ligation [GO:0006288]; DNA ligation involved in DNA repair [GO:0051103]; DNA recombination [GO:0006310]; double-strand break repair [GO:0006302]; negative regulation of mitochondrial DNA replication […	embryo,nervous system,behavior,growth/size/body,hearing/vestibular/ear,cellular,mortality/aging,muscle,craniofacial,homeostasis,cardiovascular	NO	19:4482616
10	12834757	GACAACAA	GACAA	85.3023	247	1	494	0.00202429	0	1	WA	1:0,0:0,0:0	GG-WUR-123:.,.:.,.:.	347	53|4|2	inframe_deletion	MODERATE	KIF7	ENSGALG00000006611	ENSGALT00000010674	14/18	-	3263-3269	3263-3269	1088-1090	DNK/DK	gACAACAAg/gACAAg	-	-	-11.513	PTHR24115&PTHR24115:SF445&Coiled-coils_(Ncoils):Coil	cilium [GO:0005929]; kinesin complex [GO:0005871]; ATP binding [GO:0005524]; ATPase activity [GO:0016887]; microtubule motor activity [GO:0003777]; microtubule-based movement [GO:0007018]	embryo,respiratory,skeleton,reproductive,craniofacial,limbs/digits/tail,muscle,vision/eye,cellular,cardiovascular,mortality/aging,nervous system,growth/size/body,homeostasis,digestive/alimentary	NO	10:12834757
4	51179217	T	G	72.1348	249	1	498	0.00200803	0	1	WD	0:0,1:0,0:0	.:.,GG-WUR-079:.,.:.	514802	46|9|0	missense_variant	MODERATE	ALB	ENSGALG00000035219	ENSGALT00000069352	12/15	-	1521	1490	497	I/R	aTa/aGa	-	deleterious(0)	-6.34	1.10.246.10&Pfam_domain:PF00273&PIRSF_domain:PIRSF002520&PROSITE_profiles:PS51438&PTHR11385&PTHR11385:SF13&SMART_domains:SM00103&Superfamily_domains:SSF48552	extracellular space [GO:0005615]; transport [GO:0006810]	embryo,skeleton,growth/size/body,liver/biliary,integument,homeostasis,cardiovascular,immune,limbs/digits/tail,hearing/vestibular/ear,neoplasm,mortality/aging,pigmentation,craniofacial,vision/eye,cellular,nervous system,respiratory,reproductive,adipose,behavior,observed,muscle,hematopoietic	NO	4:51179217
3	54138410	GCCCCCCA	GA	49.7206	227	1	454	0.00220264	0	1	W1	0:0,0:0,1:0	.:.,.:.,GG-WUR-099:.	679	37|3|0	inframe_deletion	MODERATE	CITED2	ENSGALG00000013818	ENSGALT00000022425	2/2	-	295-301	104-110	35-37	APH/D	gCCCCCCAc/gAc	-	-	-5.559	Low_complexity_(Seg):seg&PTHR17045&PTHR17045:SF7&Pfam_domain:PF04487	nuclear chromatin [GO:0000790]; nucleus [GO:0005634]; chromatin binding [GO:0003682]; RNA polymerase II activating transcription factor binding [GO:0001102]; RNA polymerase II transcription coactivator activity [GO:0001105]; SMAD binding [GO:0046332]; transcription coactivator activity [GO:0003713]; transcription factor activity, sequence-specific DNA binding [GO:0003700]; adrenal cortex formatio…	embryo,respiratory,skeleton,vision/eye,growth/size/body,endocrine/exocrine,limbs/digits/tail,immune,renal/urinary,digestive/alimentary,hematopoietic,cellular,observed,mortality/aging,nervous system,craniofacial,homeostasis,cardiovascular	NO	3:54138410
5	34363577	T	G	70.8791	237	1	474	0.0021097	0	1	WD	0:0,1:0,0:0	.:.,GG-WUR-225:.,.:.	5826	66|3|0	missense_variant	MODERATE	HECTD1	ENSGALG00000009946	ENSGALT00000016171	40/42	-	7384	7384	2462	N/H	Aat/Cat	-	deleterious(0)	-4.783	Pfam_domain:PF00632&PROSITE_profiles:PS50237&PTHR11254&PTHR11254:SF322&SMART_domains:SM00119&Superfamily_domains:SSF56204	cytoplasm [GO:0005737]; nucleus [GO:0005634]; metal ion binding [GO:0046872]; ubiquitin-protein transferase activity [GO:0004842]; protein ubiquitination involved in ubiquitin-dependent protein catabolic process [GO:0042787]metal ion binding [GO:0046872]; ubiquitin-protein transferase activity [GO:0004842]	embryo,skeleton,craniofacial,vision/eye,mortality/aging,nervous system,growth/size/body,cardiovascular	NO	5:34363577
7	11628706	C	G	115.465	241	1	482	0.00207469	0	1	W1	0:0,0:0,1:0	.:.,.:.,GG-WUR-249:.	3428	62|3|0	missense_variant	MODERATE	ALS2	ENSGALG00000008415	ENSGALT00000013707	3/33	-	279	212	71	R/P	cGa/cCa	-	deleterious(0.01)	-4.412	PTHR22870&PTHR22870:SF136&2.130.10.30&Superfamily_domains:SSF50985	centrosome [GO:0005813]; cytosol [GO:0005829]; dendritic spine [GO:0043197]; early endosome [GO:0005769]; lamellipodium [GO:0030027]; postsynaptic density [GO:0014069]; protein complex [GO:0043234]; ruffle [GO:0001726]; protein serine/threonine kinase activator activity [GO:0043539]; Rab guanyl-nucleotide exchange factor activity [GO:0017112]; Rac guanyl-nucleotide exchange factor activity [GO:00…	muscle,growth/size/body,immune,behavior,mortality/aging,nervous system,homeostasis	NO	7:11628706
2	76550400	C	T	131.852	246	1	492	0.00203252	0	1	W1	0:0,0:0,1:0	.:.,.:.,GG-WUR-107:.	4352	47|31|0	missense_variant	MODERATE	TRIO	ENSGALG00000031495	ENSGALT00000071221	57/57	-	9050	9050	3017	R/H	cGt/cAt	-	deleterious(0)	-3.866	PROSITE_profiles:PS50011&Pfam_domain:PF00069&1.10.510.10&SMART_domains:SM00220&Superfamily_domains:SSF56112	ATP binding [GO:0005524]; protein serine/threonine kinase activity [GO:0004674]; Rho guanyl-nucleotide exchange factor activity [GO:0005089]; regulation of Rho protein signal transduction [GO:0035023]	nervous system,behavior,growth/size/body,hearing/vestibular/ear,cellular,mortality/aging,muscle	NO	2:76550400
3	15434678	C	T	123.026	245	1	490	0.00204082	0	1	WD	0:0,1:0,0:0	.:.,GG-WUR-078:.,.:.	1690	66|0|0	missense_variant	MODERATE	CSRP2BP	ENSGALG00000008707	ENSGALT00000014169	9/10	-	2513	2092	698	A/T	Gct/Act	-	tolerated(0.06)	-3.659	3.40.630.30&Pfam_domain:PF13673&PROSITE_profiles:PS51186&PTHR20916&Superfamily_domains:SSF55729	Ada2/Gcn5/Ada3 transcription activator complex [GO:0005671]; histone acetyltransferase activity [GO:0004402]; G2/M transition of mitotic cell cycle [GO:0000086]; histone acetylation [GO:0016573]; histone H3 acetylation [GO:0043966]	embryo,pigmentation,cellular,growth/size/body,immune,vision/eye,behavior,mortality/aging,nervous system,skeleton,craniofacial,cardiovascular	NO	3:15434678
24	4369860	G	A	173.248	246	1	492	0.00203252	0	1	WD	0:0,1:0,0:0	.:.,GG-WUR-178:.,.:.	2515	64|3|0	missense_variant	MODERATE	KMT2A	ENSGALG00000006818	ENSGALT00000011022	7/36	-	3695	3695	1232	P/L	cCg/cTg	-	tolerated_low_confidence(0.09)	-3.64	Low_complexity_(Seg):seg&PTHR22884:SF387&PTHR22884&PIRSF_domain:PIRSF010354	histone methyltransferase complex [GO:0035097]; DNA binding [GO:0003677]; histone methyltransferase activity (H3-K4 specific) [GO:0042800]; zinc ion binding [GO:0008270]; regulation of transcription, DNA-templated [GO:0006355]histone methyltransferase complex [GO:0035097]; DNA binding [GO:0003677]; histone methyltransferase activity (H3-K4 specific) [GO:0042800]; zinc ion binding [GO:0008270]; re…	embryo,liver/biliary,muscle,cellular,reproductive,immune,craniofacial,limbs/digits/tail,hearing/vestibular/ear,renal/urinary,neoplasm,homeostasis,behavior,observed,cardiovascular,mortality/aging,integument,nervous system,growth/size/body,hematopoietic,skeleton	NO	24:4369860
3	3221801	A	G	69.9474	249	1	498	0.00200803	0	1	WD	0:0,1:0,0:0	.:.,GG-WUR-138:.,.:.	1739	60|9|0	missense_variant	MODERATE	MERTK	ENSGALG00000008257	ENSGALT00000013438	19/19	-	2930	2912	971	E/G	gAa/gGa	-	deleterious_low_confidence(0.01)	-3.555	-	cytoplasm [GO:0005737]; extracellular space [GO:0005615]; integral component of membrane [GO:0016021]; rhabdomere [GO:0016028]; ATP binding [GO:0005524]; protein tyrosine kinase activity [GO:0004713]; apoptotic cell clearance [GO:0043277]; natural killer cell differentiation [GO:0001779]; negative regulation of cytokine production [GO:0001818]; negative regulation of leukocyte apoptotic process […	nervous system,reproductive,digestive/alimentary,endocrine/exocrine,immune,vision/eye,hematopoietic,cellular,mortality/aging,pigmentation,homeostasis,cardiovascular	YES	3:3221801
1	195974939	G	A	256.405	242	1	484	0.00206612	0	1	W1	0:0,0:0,1:0	.:.,.:.,GG-WUR-103:.	1028	64|4|0	missense_variant	MODERATE	POLD3	ENSGALG00000017307	ENSGALT00000027966	6/12	-	505	419	140	A/V	gCa/gTa	-	deleterious(0)	-3.365	PTHR17598&Pfam_domain:PF09507	cytoplasm [GO:0005737]; nucleoplasm [GO:0005654]; base-excision repair [GO:0006284]; DNA replication [GO:0006260]	limbs/digits/tail,mortality/aging	NO	1:195974939
8	3818299	C	T	313.388	220	1	440	0.00227273	0	1	W1	0:0,0:0,1:0	.:.,.:.,GG-WUR-174:.	238	52|24|2	missense_variant	MODERATE	DDR2	ENSGALG00000039322	ENSGALT00000062233	1/11	-	557	557	186	R/Q	cGa/cAa	-	-	-3.106	Low_complexity_(Seg):seg	integral component of plasma membrane [GO:0005887]; ATP binding [GO:0005524]; protein tyrosine kinase collagen receptor activity [GO:0038062]integral component of plasma membrane [GO:0005887]; ATP binding [GO:0005524]; protein tyrosine kinase collagen receptor activity [GO:0038062]	muscle,skeleton,reproductive,craniofacial,adipose,endocrine/exocrine,limbs/digits/tail,vision/eye,cellular,mortality/aging,nervous system,growth/size/body,homeostasis,cardiovascular	NO	8:3818299
14	6947281	G	A	721.303	201	1	402	0.00248756	0	1	WA	1:0,0:0,0:0	GG-WUR-156:.,.:.,.:.	957	61|4|2	missense_variant	MODERATE	ERN1	ENSGALG00000027592	ENSGALT00000043152	8/22	-	878	805	269	R/C	Cgc/Tgc	-	deleterious(0.01)	-3.091	PTHR13954:SF15&PTHR13954	IRE1-TRAF2-ASK1 complex [GO:1990604]; ATP binding [GO:0005524]; protein kinase activity [GO:0004672]; ribonuclease activity [GO:0004540]; activation of JUN kinase activity [GO:0007257]; cell cycle arrest [GO:0007050]; intrinsic apoptotic signaling pathway in response to endoplasmic reticulum stress [GO:0070059]; mRNA processing [GO:0006397]; regulation of transcription, DNA-templated [GO:0006355]	embryo,growth/size/body,liver/biliary,immune,hematopoietic,cellular,observed,mortality/aging,integument,homeostasis,cardiovascular	NO	14:6947281
8	2186867	G	A	122.403	243	1	486	0.00205761	0	1	WD	0:0,1:0,0:0	.:.,GG-WUR-201:.,.:.	4128	60|8|0	missense_variant	MODERATE	NEK7	ENSGALG00000002216	ENSGALT00000003472	9/9	-	830	830	277	A/V	gCg/gTg	-	deleterious(0)	-3.04	PROSITE_profiles:PS50011&PIRSF_domain:PIRSF000654&SMART_domains:SM00220	ATP binding [GO:0005524]; protein serine/threonine kinase activity [GO:0004674]nucleoplasm [GO:0005654]; ATP binding [GO:0005524]; protein serine/threonine kinase activity [GO:0004674]; positive regulation of telomerase activity [GO:0051973]; positive regulation of telomere capping [GO:1904355]; positive regulation of telomere maintenance via telomerase [GO:0032212]	cellular,reproductive,growth/size/body,immune,behavior,observed,mortality/aging,hematopoietic	NO	8:2186867
4	52986318	G	A	228.015	218	1	436	0.00229358	0	1	W1	0:0,0:0,1:0	.:.,.:.,GG-WUR-269:.	803	57|8|0	missense_variant	MODERATE	FAT4	ENSGALG00000011823	ENSGALT00000019298	1/12	-	1633	1100	367	A/V	gCg/gTg	-	-	-3.024	2.60.40.60&Pfam_domain:PF00028&PROSITE_profiles:PS50268&PTHR24026&PTHR24026:SF43&Superfamily_domains:SSF49313	apical part of cell [GO:0045177]; extracellular exosome [GO:0070062]; integral component of membrane [GO:0016021]; intracellular [GO:0005622]; plasma membrane [GO:0005886]; calcium ion binding [GO:0005509]; branching involved in ureteric bud morphogenesis [GO:0001658]; cerebral cortex development [GO:0021987]; condensed mesenchymal cell proliferation [GO:0072137]; digestive tract development [GO:…	embryo,nervous system,skeleton,growth/size/body,limbs/digits/tail,hearing/vestibular/ear,renal/urinary,respiratory,cellular,mortality/aging,cardiovascular,digestive/alimentary	NO	4:52986318
5	39343769	G	A	20.9062	243	1	486	0.00205761	0	1	W1	0:0,0:0,1:0	.:.,.:.,GG-WUR-064:.	2295	53|21|4	missense_variant	MODERATE	SPTLC2	ENSGALG00000031928	ENSGALT00000051622	9/12	-	1359	1292	431	T/I	aCt/aTt	-	tolerated(0.18)	-2.95	3.90.1150.10&Pfam_domain:PF00155&PTHR13693&PTHR13693:SF52&Superfamily_domains:SSF53383	integral component of membrane [GO:0016021]; mitochondrion [GO:0005739]; serine C-palmitoyltransferase complex [GO:0017059]; pyridoxal phosphate binding [GO:0030170]; serine C-palmitoyltransferase activity [GO:0004758]; ceramide biosynthetic process [GO:0046513]; positive regulation of lipophagy [GO:1904504]; sphinganine biosynthetic process [GO:0046511]; sphingomyelin biosynthetic process [GO:00…	growth/size/body,endocrine/exocrine,liver/biliary,immune,hematopoietic,cellular,mortality/aging,integument,homeostasis,digestive/alimentary	NO	5:39343769
9	7644479	C	G	38.5899	245	1	490	0.00204082	0	1	WD	0:0,1:0,0:0	.:.,GG-WUR-182:.,.:.	206	54|19|9	missense_variant&splice_region_variant	MODERATE	EPHA4	ENSGALG00000005256	ENSGALT00000008440	9/17	-	1896	1597	533	G/R	Ggt/Cgt	-	deleterious(0.01)	1	PTHR24416&PTHR24416:SF337&PIRSF_domain:PIRSF000666&Pfam_domain:PF14575&3.30.200.20	axon [GO:0030424]; cytoplasm [GO:0005737]; dendrite [GO:0030425]; early endosome membrane [GO:0031901]; integral component of plasma membrane [GO:0005887]; plasma membrane [GO:0005886]; ATP binding [GO:0005524]; DH domain binding [GO:0097161]; GPI-linked ephrin receptor activity [GO:0005004]; protein kinase activity [GO:0004672]; transmembrane-ephrin receptor activity [GO:0005005]; adult walking …	behavior,reproductive,endocrine/exocrine,liver/biliary,cellular,observed,mortality/aging,nervous system,hematopoietic	NO	9:7644479
4	58417168	C	G	453.84	244	1	488	0.00204918	0	1	WD	0:0,1:0,0:0	.:.,GG-WUR-079:.,.:.	467	57|3|0	missense_variant	MODERATE	EGF	ENSGALG00000012155	ENSGALT00000019851	13/25	-	1949	1880	627	S/T	aGc/aCc	-	deleterious(0)	1	2.120.10.30&Pfam_domain:PF00058&PIRSF_domain:PIRSF001778&PROSITE_profiles:PS51120&PTHR10529&PTHR10529:SF200&SMART_domains:SM00135&Superfamily_domains:SSF63825	integral component of membrane [GO:0016021]; plasma membrane [GO:0005886]; receptor complex [GO:0043235]; calcium ion binding [GO:0005509]; Wnt-activated receptor activity [GO:0042813]; Wnt-protein binding [GO:0017147]; canonical Wnt signaling pathway [GO:0060070]; Wnt signaling pathway involved in dorsal/ventral axis specification [GO:0044332]integral component of membrane [GO:0016021]; calcium …	embryo,skeleton,growth/size/body,endocrine/exocrine,liver/biliary,integument,homeostasis,cardiovascular,immune,limbs/digits/tail,hearing/vestibular/ear,mortality/aging,pigmentation,craniofacial,vision/eye,cellular,nervous system,respiratory,reproductive,adipose,renal/urinary,behavior,observed,muscle,hematopoietic,digestive/alimentary	YES	4:58417168
9	7644479	C	G	38.5899	245	1	490	0.00204082	0	1	WD	0:0,1:0,0:0	.:.,GG-WUR-182:.,.:.	206	54|19|9	missense_variant&splice_region_variant	MODERATE	EPHA4	ENSGALG00000005256	ENSGALT00000008440	9/17	-	1896	1597	533	G/R	Ggt/Cgt	-	deleterious(0.01)	1	PTHR24416&PTHR24416:SF337&PIRSF_domain:PIRSF000666&Pfam_domain:PF14575&3.30.200.20	axon [GO:0030424]; cytoplasm [GO:0005737]; dendrite [GO:0030425]; early endosome membrane [GO:0031901]; integral component of plasma membrane [GO:0005887]; plasma membrane [GO:0005886]; ATP binding [GO:0005524]; DH domain binding [GO:0097161]; GPI-linked ephrin receptor activity [GO:0005004]; protein kinase activity [GO:0004672]; transmembrane-ephrin receptor activity [GO:0005005]; adult walking …	behavior,reproductive,endocrine/exocrine,liver/biliary,cellular,observed,mortality/aging,nervous system,hematopoietic	NO	9:7644479
15	8930725	G	A	213.563	247	1	494	0.00202429	0	1	WD	0:0,1:0,0:0	.:.,GG-WUR-222:.,.:.	1076	44|19|10	missense_variant	MODERATE	DEPDC5	ENSGALG00000006766	ENSGALT00000010946	9/42	-	644	584	195	A/V	gCt/gTt	-	deleterious(0)	1	PTHR13179&Pfam_domain:PF12257	intracellular [GO:0005622]; intracellular signal transduction [GO:0035556]intracellular [GO:0005622]; intracellular signal transduction [GO:0035556]cytosol [GO:0005829]; Iml1 complex [GO:1990130]; lysosomal membrane [GO:0005765]; perinuclear region of cytoplasm [GO:0048471]; GTPase activator activity [GO:0005096]; cellular response to amino acid starvation [GO:0034198]; intracellular signal trans…	mortality/aging,homeostasis	NO	15:8930725
1	114828011	GAA	GA	90.388	245	1	490	0.00204082	0	1	WA	1:0,0:0,0:0	GG-WUR-054:.,.:.,.:.	3525	44|25|0	frameshift_variant	HIGH	DMD	ENSGALG00000016281	ENSGALT00000026250	24/78	-	3377-3378	3227-3228	1076	E/X	gAA/gA	-	-	NA	PTHR11915:SF261&PTHR11915&1.20.58.60&Pfam_domain:PF00435&PIRSF_domain:PIRSF002341&SMART_domains:SM00150&Superfamily_domains:SSF46966	zinc ion binding [GO:0008270]cell-substrate junction [GO:0030055]; dystrophin-associated glycoprotein complex [GO:0016010]; membrane raft [GO:0045121]; neuron projection terminus [GO:0044306]; sarcolemma [GO:0042383]; synapse [GO:0045202]; Z disc [GO:0030018]; structural constituent of cytoskeleton [GO:0005200]; zinc ion binding [GO:0008270]; cardiac muscle cell action potential [GO:0086001]; cel…	muscle,cellular,reproductive,immune,growth/size/body,adipose,endocrine/exocrine,hearing/vestibular/ear,vision/eye,hematopoietic,behavior,observed,mortality/aging,digestive/alimentary,skeleton,nervous system,homeostasis,cardiovascular	NO	1:114828011
6	27616651	ACTCTCTCTG	ACTCTCTG	83.297	241	1	482	0.00207469	0	1	W1	0:0,0:0,1:0	.:.,.:.,GG-WUR-268:.	2349	64|5|0	frameshift_variant	HIGH	NHLRC2	ENSGALG00000008946	ENSGALT00000014546	8/12	-	1362-1370	1228-1236	410-412	LSL/LSX	CTCTCTCTG/CTCTCTG	-	-	NA	PTHR13833:SF49&PTHR13833&2.120.10.30&Superfamily_domains:SSF101898	cell [GO:0005623]; cell redox homeostasis [GO:0045454]	mortality/aging	NO	6:27616651
9	4916540	TTCT	TT	111.105	241	1	482	0.00207469	0	1	WD	0:0,1:0,0:0	.:.,GG-WUR-178:.,.:.	383	57|2|2	frameshift_variant	HIGH	PASK	ENSGALG00000006016	ENSGALT00000009680	6/17	-	969-971	969-971	323-324	RE/RX	agAGAa/agAa	-	-	NA	-	cytoplasm [GO:0005737]; Golgi apparatus [GO:0005794]; nucleus [GO:0005634]; ATP binding [GO:0005524]; phosphatidylinositol binding [GO:0035091]; protein serine/threonine kinase activity [GO:0004674]; negative regulation of glycogen biosynthetic process [GO:0045719]; protein autophosphorylation [GO:0046777]; protein phosphorylation [GO:0006468]; regulation of energy homeostasis [GO:2000505]; regul…	nervous system,reproductive,growth/size/body,endocrine/exocrine,liver/biliary,renal/urinary,respiratory,muscle,homeostasis,cardiovascular	NO	9:4916540
18	6808616	AACAGA	AA	104.996	246	1	492	0.00203252	0	1	W1	0:0,0:0,1:0	.:.,.:.,GG-WUR-048:.	14143	58|18|0	frameshift_variant	HIGH	ZNF207	ENSGALG00000003454	ENSGALT00000005471	3/11	-	345-349	217-221	73-74	TD/X	ACAGAc/Ac	-	-	NA	PTHR23215	metal ion binding [GO:0046872]kinetochore [GO:0000776]; nucleolus [GO:0005730]; nucleus [GO:0005634]; spindle matrix [GO:1990047]; heparin binding [GO:0008201]; metal ion binding [GO:0046872]; microtubule binding [GO:0008017]; poly(A) RNA binding [GO:0044822]; attachment of spindle microtubules to kinetochore [GO:0008608]; mitotic sister chromatid segregation [GO:0000070]; mitotic spindle assembl…	mortality/aging,homeostasis	NO	18:6808616
22	1608274	CGTC	CA	838.606	244	1	488	0.00204918	0	1	W1	0:0,0:0,1:0	.:.,.:.,GG-WUR-234:.	5227	63|8|0	frameshift_variant	HIGH	ATP6V1B2	ENSGALG00000033663	ENSGALT00000082444	6/14	-	514-516	514-516	172	D/X	GAC/T	-	-	NA	MF_00310&PTHR15184:SF30&PTHR15184&Pfam_domain:PF00006&PIRSF_domain:PIRSF039114&TIGRFAM_domain:TIGR01040&3.40.50.300&Superfamily_domains:SSF52540	proton-transporting V-type ATPase, V1 domain [GO:0033180]; ATP binding [GO:0005524]; hydrolase activity, acting on acid anhydrides, catalyzing transmembrane movement of substances [GO:0016820]; ATP hydrolysis coupled proton transport [GO:0015991]; ATP metabolic process [GO:0046034]	mortality/aging,hematopoietic	NO	22:1608274
2	1831512	G	C	161.131	247	1	494	0.00202429	0	1	W1	0:0,0:0,1:0	.:.,.:.,GG-WUR-012:.	364	44|22|0	splice_acceptor_variant	HIGH	VIPR1	ENSGALG00000005259	ENSGALT00000008443	-	6/12	-	-	-	-	-	-	-	NA	-	integral component of membrane [GO:0016021]; receptor complex [GO:0043235]; vasoactive intestinal polypeptide receptor activity [GO:0004999]; cell surface receptor signaling pathway [GO:0007166]integral component of membrane [GO:0016021]; vasoactive intestinal polypeptide receptor activity [GO:0004999]; cell surface receptor signaling pathway [GO:0007166]	behavior,growth/size/body,endocrine/exocrine,cellular,mortality/aging,cardiovascular,homeostasis,digestive/alimentary	NO	2:1831512
3	14006562	C	T	161.166	238	1	476	0.00210084	0	1	WD	0:0,1:0,0:0	.:.,GG-WUR-202:.,.:.	671	65|4|0	splice_donor_variant	HIGH	PLCB4	ENSGALG00000008907	ENSGALT00000044628	-	18/35	-	-	-	-	-	-	-	NA	-	dendrite [GO:0030425]; nucleus [GO:0005634]; postsynaptic density [GO:0014069]; smooth endoplasmic reticulum [GO:0005790]; calcium ion binding [GO:0005509]; phosphatidylinositol phospholipase C activity [GO:0004435]; signal transducer activity [GO:0004871]; intracellular signal transduction [GO:0035556]; lipid catabolic process [GO:0016042]	mortality/aging,growth/size/body,nervous system,vision/eye,behavior	NO	3:14006562
5	44751912	G	C	64.6004	221	1	442	0.00226244	0	1	W1	0:0,0:0,1:0	.:.,.:.,GG-WUR-098:.	209	56|13|0	splice_acceptor_variant	HIGH	SLC24A4	ENSGALG00000010793	ENSGALT00000017553	-	3/15	-	-	-	-	-	-	-	NA	-	integral component of plasma membrane [GO:0005887]; calcium channel activity [GO:0005262]; calcium ion binding [GO:0005509]; calcium, potassium:sodium antiporter activity [GO:0008273]; potassium ion binding [GO:0030955]; sodium ion binding [GO:0031402]; cellular calcium ion homeostasis [GO:0006874]; sensory perception of smell [GO:0007608]	taste/olfaction,skeleton,craniofacial,mortality/aging,nervous system,growth/size/body,homeostasis	NO	5:44751912
12	7243695	G	A	38.1662	216	1	432	0.00231481	0	1	W1	0:0,0:0,1:0	.:.,.:.,GG-WUR-148:.	1398	63|4|0	stop_gained	HIGH	ACTR8	ENSGALG00000005385	ENSGALT00000008651	1/13	-	67	61	21	Q/*	Cag/Tag	-	-	NA	Low_complexity_(Seg):seg	Ino80 complex [GO:0031011]; chromatin remodeling [GO:0006338]	mortality/aging,cardiovascular	NO	12:7243695
13	13824193	G	T	85.6783	246	1	492	0.00203252	0	1	W1	0:0,0:0,1:0	.:.,.:.,GG-WUR-174:.	1987	55|12|0	stop_gained	HIGH	ADAMTS2	ENSGALG00000032974	ENSGALT00000057514	17/20	-	2245	2245	749	E/*	Gag/Tag	-	-	NA	2.20.100.10&PROSITE_profiles:PS50092&PTHR13723&PTHR13723:SF141&SMART_domains:SM00209&Superfamily_domains:SSF82895&Superfamily_domains:SSF82895	proteinaceous extracellular matrix [GO:0005578]; metalloendopeptidase activity [GO:0004222]; zinc ion binding [GO:0008270]	respiratory,skeleton,reproductive,craniofacial,observed,integument,growth/size/body	NO	13:13824193
17	1126936	G	C	85.3072	244	1	488	0.00204918	0	1	WD	0:0,1:0,0:0	.:.,GG-WUR-071:.,.:.	8387	61|5|0	stop_gained	HIGH	AMBP	ENSGALG00000030255	ENSGALT00000079240	8/10	-	778	723	241	Y/*	taC/taG	-	-	NA	PROSITE_profiles:PS50279&PTHR10083:SF18&PTHR10083&4.10.410.10&Pfam_domain:PF00014&SMART_domains:SM00131&Superfamily_domains:SSF57362	extracellular region [GO:0005576]; serine-type endopeptidase inhibitor activity [GO:0004867]; small molecule binding [GO:0036094]	embryo,reproductive,behavior,endocrine/exocrine	NO	17:1126936
19	5631343	GAAAAAAAAAC	GGAAAAAAAACAAAC	1034.23	243	0	486	0	0	0	W1	0:0,0:0,2:0	.:.,.:.,GG-WUR-244_GG-WUR-246:.	542	61|4|0	splice_donor_variant&intron_variant	HIGH	POLDIP2	ENSGALG00000003211	ENSGALT00000072678	-	8/10	-	-	-	-	-	-	-	NA	-	DNA binding [GO:0003677]mitochondrial nucleoid [GO:0042645]; DNA binding [GO:0003677]; mitochondrion morphogenesis [GO:0070584]; negative regulation of macroautophagy [GO:0016242]; positive regulation of mitotic cell cycle [GO:0045931]	mortality/aging,growth/size/body,muscle,homeostasis,cardiovascular	NO	19:5631343
