# Supplementary material for: A survey of functional genomic variation in domesticated chickens
Source: Genet Sel Evol. 2018 Apr 16;50:17. doi: 10.1186/s12711-018-0390-1 (PMC5902831; doi:10.1186/s12711-018-0390-1)
Supplement: Supplementary file 5 — Additional file 5: Table S1. Evolutionary-intolerant fixed variants (AF > 90%). Table S2. DAVID gene-set enrichment analysis for evolutionary-intolerant fixed variation. Table S3. Evolutionary-intolerant variants predicted to have a severe impact on the protein (PROVEAN score <= -5). Table S4. Fixed evolutionary-intolerant variants in selective sweep regions. [file 12711_2018_390_MOESM5_ESM.xlsx]

## Sheet: Description
CHROM	Chromsome
POS	Position
REF	Reference allele
ALT	Alternate allele
QUAL	Variant quality score
Number_of_samples	Number of animals with genotype call
Allele_count	Number of animals with allele
Allele_number	Number of times the allele was called
Allele_frequency	Allele frequency
Allele_count_homozygote	Allele count homozygote
Allele_count_heterozygote	Allele count heterozygote
Breed	Breed
Allele_count_breed(WA_het:WA_hom,WD_het:WD_hom,W1_het:W1_hom)	Number of heterozygote and homozygote carrier animals in the different lines
tAllele_count_samples(WA_het:WA_hom,WD_het:WD_hom,W1_het:W1_hom)	Heterozygote and homozygote carrier animals in the different lines
RNA_seq_coverage(ensembl)	Ensembl RNA-seq coverage
Ensembl_Orthology(one2one|one2many|many2many)	Ensembl orthology
Consequence	Consequence of variant
IMPACT	Impact of the variant
SYMBOL	Gene symbol
Gene	Gene id (ensembl)
Transcript	Transcript id (ensembl)
EXON_NR	Exon number
INTRON_NR	Intron number
cDNA_position	Position in cDNA
CDS_position	Position in CDS
Protein_position	Position in protein
Amino_acids	Amino acid change
Codons	Codon change
Phenotype	Phenotype assigned to gene
SIFT	Sift score
Provean	Provean score
Domains	Protein domains
GO	Gene ontology annotations
Phenotype	MGI phenotype associations with gene
dbSNP	Variant annotated in dbSNP (YES/NO)

## Sheet: TableS1
Table S1: Evolutionary intolerant fixed variants (AF > 90%)
CHROM	POS	REF	ALT	QUAL	Number_of_samples	Allele_count	Allele_number	Allele_frequency	Allele_count_homozygote	Allele_count_heterozygote	Breed	Allele_count_breed(WA_het:WA_hom,WD_het:WD_hom,W1_het:W1_hom)	tAllele_count_samples(WA_het:WA_hom,WD_het:WD_hom,W1_het:W1_hom)	RNA_seq_coverage(ensembl)	Ensembl_Orthology(one2one|one2many|many2many)	Consequence	IMPACT	SYMBOL	Gene	Transcript	EXON_NR	INTRON_NR	cDNA_position	CDS_position	Protein_position	Amino_acids	Codons	Phenotype	SIFT	Provean	Domains	GO	Phenotype	dbSNP
1	6207468	CAATGT	AGATGT	93644.3	238	476	476	1	476	0	WA_WD_W1	0:68,0:75,0:95	.:GG-WUR-108_GG-WUR-262_GG-WUR-068_GG-WUR-154_GG-WUR-042_GG-WUR-114_GG-WUR-121_GG-WUR-156_GG-WUR-059_GG-WUR-253_GG-WUR-116_GG-WUR-113_GG-WUR-120_GG-WUR-117_GG-WUR-159_GG-WUR-258_GG-WUR-036_GG-WUR-162_GG-WUR-256_GG-WUR-239_GG-WUR-051_GG-WUR-092_GG-WUR-163_GG-WUR-069_GG-WUR-115_GG-WUR-130_GG-WUR-238_GG-WUR-236_GG-WUR-123_GG-WUR-055_GG-WUR-263_GG-WUR-175_GG-WUR-050_GG-WUR-153_GG-WUR-118_GG-WUR-259_G…	874	53|2|0	missense_variant	MODERATE	PROSER2	ENSGALG00000006700	ENSGALT00000010831	4/5	-	431-436	431-436	144-146	PMC/QMC	cCAATGTgt/cAGATGTgt	-	-	-3.856	PTHR16095&PTHR16095:SF9&Low_complexity_(Seg):seg	-	-	YES
1	8995491	G	A	107259	241	482	482	1	482	0	WA_WD_W1	0:68,0:77,0:96	.:GG-WUR-108_GG-WUR-262_GG-WUR-068_GG-WUR-154_GG-WUR-042_GG-WUR-121_GG-WUR-156_GG-WUR-059_GG-WUR-253_GG-WUR-116_GG-WUR-261_GG-WUR-257_GG-WUR-113_GG-WUR-120_GG-WUR-117_GG-WUR-159_GG-WUR-258_GG-WUR-036_GG-WUR-162_GG-WUR-256_GG-WUR-239_GG-WUR-051_GG-WUR-092_GG-WUR-163_GG-WUR-069_GG-WUR-115_GG-WUR-130_GG-WUR-238_GG-WUR-236_GG-WUR-123_GG-WUR-055_GG-WUR-263_GG-WUR-175_GG-WUR-050_GG-WUR-153_GG-WUR-118_G…	1041	49|24|0	missense_variant	MODERATE	SEMA3A	ENSGALG00000006560	ENSGALT00000042634	18/18	-	2418	2332	778	A/T	Gca/Aca	1	deleterious_low_confidence(0)	-0.58	-	cell body [GO:0044297]; extracellular space [GO:0005615]; neuropilin binding [GO:0038191]; fasciculation of motor neuron axon [GO:0097156]; motor neuron axon guidance [GO:0008045]; negative regulation of protein localization to cell surface [GO:2000009]; neuron projection maintenance [GO:1990535]cell body [GO:0044297]; extracellular space [GO:0005615]; chemorepellent activity [GO:0045499]; neurop…	behavior,growth/size/body,immune,cellular,mortality/aging,nervous system,skeleton,hematopoietic,cardiovascular	YES
1	15897076	GAGAAGAT	TTCAACAA	68775.9	211	422	422	1	422	0	WA_WD_W1	0:63,0:62,0:86	.:GG-WUR-108_GG-WUR-068_GG-WUR-154_GG-WUR-042_GG-WUR-114_GG-WUR-121_GG-WUR-156_GG-WUR-059_GG-WUR-253_GG-WUR-116_GG-WUR-261_GG-WUR-257_GG-WUR-113_GG-WUR-120_GG-WUR-159_GG-WUR-258_GG-WUR-036_GG-WUR-162_GG-WUR-256_GG-WUR-239_GG-WUR-092_GG-WUR-115_GG-WUR-130_GG-WUR-238_GG-WUR-123_GG-WUR-055_GG-WUR-263_GG-WUR-175_GG-WUR-050_GG-WUR-153_GG-WUR-118_GG-WUR-259_GG-WUR-252_GG-WUR-111_GG-WUR-254_GG-WUR-134_G…	344	55|7|0	missense_variant	MODERATE	CELSR1	ENSGALG00000043355	ENSGALT00000060656	1/35	-	2513-2520	2290-2297	764-766	IFS/LLN	ATCTTCTCt/TTGTTGAAt	-	-	-2.672	2.60.40.60&Pfam_domain:PF00028&SMART_domains:SM00112&Superfamily_domains:SSF49313&PROSITE_profiles:PS50268&PTHR24026:SF36&PTHR24026	integral component of membrane [GO:0016021]; calcium ion binding [GO:0005509]; G-protein coupled receptor activity [GO:0004930]; cell surface receptor signaling pathway [GO:0007166]integral component of membrane [GO:0016021]; plasma membrane [GO:0005886]; calcium ion binding [GO:0005509]; G-protein coupled receptor activity [GO:0004930]; cell surface receptor signaling pathway [GO:0007166]; homop…	embryo,respiratory,behavior,reproductive,immune,growth/size/body,endocrine/exocrine,limbs/digits/tail,hearing/vestibular/ear,vision/eye,cellular,mortality/aging,integument,nervous system,craniofacial,skeleton	NO
1	20335189	GT	GATTT	106317	242	484	484	1	484	0	WA_WD_W1	0:65,0:77,0:100	.:GG-WUR-108_GG-WUR-262_GG-WUR-068_GG-WUR-154_GG-WUR-042_GG-WUR-114_GG-WUR-121_GG-WUR-156_GG-WUR-059_GG-WUR-253_GG-WUR-116_GG-WUR-261_GG-WUR-113_GG-WUR-120_GG-WUR-117_GG-WUR-159_GG-WUR-258_GG-WUR-036_GG-WUR-162_GG-WUR-239_GG-WUR-051_GG-WUR-092_GG-WUR-163_GG-WUR-069_GG-WUR-115_GG-WUR-130_GG-WUR-238_GG-WUR-236_GG-WUR-123_GG-WUR-055_GG-WUR-175_GG-WUR-050_GG-WUR-153_GG-WUR-118_GG-WUR-252_GG-WUR-111_G…	1121	56|8|0	inframe_insertion	MODERATE	HDAC10	ENSGALG00000041251	ENSGALT00000059215	13/19	-	1146	1146	382	T/TN	acA/acAAAT	-	-	1	-	hydrolase activity [GO:0016787]	homeostasis,hematopoietic	YES
1	32965854	GCCCAAGATTT	CCCCCAGTAC	62112.2	200	400	400	1	400	0	WA_WD_W1	0:53,0:62,0:85	.:GG-WUR-108_GG-WUR-068_GG-WUR-154_GG-WUR-042_GG-WUR-121_GG-WUR-156_GG-WUR-059_GG-WUR-116_GG-WUR-261_GG-WUR-257_GG-WUR-113_GG-WUR-120_GG-WUR-117_GG-WUR-159_GG-WUR-239_GG-WUR-051_GG-WUR-092_GG-WUR-163_GG-WUR-069_GG-WUR-115_GG-WUR-130_GG-WUR-238_GG-WUR-123_GG-WUR-055_GG-WUR-175_GG-WUR-050_GG-WUR-153_GG-WUR-259_GG-WUR-134_GG-WUR-119_GG-WUR-088_GG-WUR-147_GG-WUR-090_GG-WUR-136_GG-WUR-240_GG-WUR-160_G…	3991	61|9|0	splice_donor_variant&protein_altering_variant	HIGH	USP15	ENSGALG00000030024	ENSGALT00000054787	19-20/23	19/22	2518-2527	2479-2488	827-830	AQDFX/PPVL	GCCCAAGATTTtg/CCCCCAGTACtg	-	-	NA	Pfam_domain:PF00443&PROSITE_profiles:PS50235&PTHR24006&PTHR24006:SF387&Superfamily_domains:SSF54001	thiol-dependent ubiquitin-specific protease activity [GO:0004843]; protein deubiquitination [GO:0016579]; ubiquitin-dependent protein catabolic process [GO:0006511]thiol-dependent ubiquitin-specific protease activity [GO:0004843]; protein deubiquitination [GO:0016579]; ubiquitin-dependent protein catabolic process [GO:0006511]thiol-dependent ubiquitin-specific protease activity [GO:0004843]; prot…	-	NO
1	35299838	TCACC	CCACC	111976	244	446	488	0.913934	412	34	WA_WD_W1	0:69,2:75,32:62	.:GG-WUR-108_GG-WUR-262_GG-WUR-068_GG-WUR-154_GG-WUR-042_GG-WUR-114_GG-WUR-121_GG-WUR-156_GG-WUR-059_GG-WUR-116_GG-WUR-261_GG-WUR-257_GG-WUR-113_GG-WUR-120_GG-WUR-117_GG-WUR-159_GG-WUR-258_GG-WUR-036_GG-WUR-162_GG-WUR-256_GG-WUR-239_GG-WUR-051_GG-WUR-092_GG-WUR-163_GG-WUR-069_GG-WUR-115_GG-WUR-130_GG-WUR-238_GG-WUR-236_GG-WUR-123_GG-WUR-055_GG-WUR-263_GG-WUR-175_GG-WUR-050_GG-WUR-153_GG-WUR-118_G…	1793	52|31|0	splice_acceptor_variant&intron_variant	HIGH	MDM2	ENSGALG00000009942	ENSGALT00000016163	-	1/9	-	-	-	-	-	-	-	NA	-	cytoplasm [GO:0005737]; nuclear body [GO:0016604]; nucleolus [GO:0005730]; protein complex [GO:0043234]; ligase activity [GO:0016874]; ubiquitin protein ligase activity [GO:0061630]; zinc ion binding [GO:0008270]; atrial septum development [GO:0003283]; atrioventricular valve morphogenesis [GO:0003181]; blood vessel development [GO:0001568]; blood vessel remodeling [GO:0001974]; cardiac septum mo…	embryo,limbs/digits/tail,pigmentation,reproductive,growth/size/body,endocrine/exocrine,liver/biliary,immune,renal/urinary,neoplasm,digestive/alimentary,homeostasis,cellular,no abnormal phenotype observed,mortality/aging,integument,muscle,hematopoietic,cardiovascular	YES
1	39574338	T	G	104112	239	453	478	0.947699	428	25	WA_WD_W1	0:68,0:78,25:68	.:GG-WUR-108_GG-WUR-262_GG-WUR-068_GG-WUR-154_GG-WUR-042_GG-WUR-114_GG-WUR-121_GG-WUR-156_GG-WUR-059_GG-WUR-253_GG-WUR-116_GG-WUR-257_GG-WUR-113_GG-WUR-120_GG-WUR-117_GG-WUR-159_GG-WUR-258_GG-WUR-036_GG-WUR-162_GG-WUR-239_GG-WUR-051_GG-WUR-092_GG-WUR-163_GG-WUR-069_GG-WUR-115_GG-WUR-130_GG-WUR-238_GG-WUR-236_GG-WUR-123_GG-WUR-055_GG-WUR-263_GG-WUR-175_GG-WUR-050_GG-WUR-153_GG-WUR-118_GG-WUR-259_G…	2315	65|2|0	missense_variant	MODERATE	PPP1R12A	ENSGALG00000010325	ENSGALT00000082690	22/22	-	2915	2915	972	Y/S	tAt/tCt	-	deleterious_low_confidence(0)	1.811	-	A band [GO:0031672]; actin cytoskeleton [GO:0015629]; centrosome [GO:0005813]; focal adhesion [GO:0005925]; kinetochore [GO:0000776]; PTW/PP1 phosphatase complex [GO:0072357]; Z disc [GO:0030018]; 14-3-3 protein binding [GO:0071889]; enzyme inhibitor activity [GO:0004857]; phosphatase regulator activity [GO:0019208]; cellular response to drug [GO:0035690]; centrosome organization [GO:0051297]; mi…	growth/size/body,immune,renal/urinary,cardiovascular,mortality/aging,muscle,digestive/alimentary	YES
1	51022576	A	G	135333	236	472	472	1	472	0	WA_WD_W1	0:66,0:76,0:94	.:GG-WUR-108_GG-WUR-068_GG-WUR-154_GG-WUR-042_GG-WUR-114_GG-WUR-121_GG-WUR-156_GG-WUR-059_GG-WUR-253_GG-WUR-116_GG-WUR-261_GG-WUR-257_GG-WUR-113_GG-WUR-120_GG-WUR-117_GG-WUR-159_GG-WUR-258_GG-WUR-036_GG-WUR-162_GG-WUR-239_GG-WUR-051_GG-WUR-092_GG-WUR-163_GG-WUR-069_GG-WUR-115_GG-WUR-130_GG-WUR-238_GG-WUR-236_GG-WUR-123_GG-WUR-055_GG-WUR-263_GG-WUR-175_GG-WUR-050_GG-WUR-153_GG-WUR-118_GG-WUR-259_G…	604	66|2|0	missense_variant	MODERATE	PLA2G6	ENSGALG00000012281	ENSGALT00000020069	5/16	-	838	838	280	I/V	Atc/Gtc	-	deleterious(0.01)	0.57	PROSITE_profiles:PS50297&PTHR24139&PTHR24139:SF34&1.25.40.20&SMART_domains:SM00248&Superfamily_domains:SSF48403	cytoplasm [GO:0005737]; extracellular space [GO:0005615]; microtubule organizing center [GO:0005815]; antibacterial humoral response [GO:0019731]; cardiolipin biosynthetic process [GO:0032049]	muscle,cellular,reproductive,growth/size/body,immune,vision/eye,homeostasis,behavior,mortality/aging,nervous system,hematopoietic,skeleton	YES
1	51477140	ACGTGC	CTGTGG	90024.3	241	482	482	1	482	0	WA_WD_W1	0:68,0:73,0:100	.:GG-WUR-108_GG-WUR-262_GG-WUR-068_GG-WUR-154_GG-WUR-042_GG-WUR-114_GG-WUR-121_GG-WUR-156_GG-WUR-059_GG-WUR-253_GG-WUR-116_GG-WUR-261_GG-WUR-257_GG-WUR-113_GG-WUR-120_GG-WUR-117_GG-WUR-159_GG-WUR-258_GG-WUR-036_GG-WUR-162_GG-WUR-256_GG-WUR-051_GG-WUR-092_GG-WUR-163_GG-WUR-069_GG-WUR-115_GG-WUR-130_GG-WUR-238_GG-WUR-236_GG-WUR-123_GG-WUR-055_GG-WUR-263_GG-WUR-175_GG-WUR-050_GG-WUR-153_GG-WUR-118_G…	537	43|7|14	missense_variant	MODERATE	-	ENSGALG00000027067	ENSGALT00000045767	3/3	-	554-559	554-559	185-187	YVP/SVA	tACGTGCct/tCTGTGGct	-	-	-8.142	PROSITE_profiles:PS50871&PTHR22923:SF56&PTHR22923&2.60.120.40&Pfam_domain:PF00386&SMART_domains:SM00110&Superfamily_domains:SSF49842&Prints_domain:PR00007	collagen trimer [GO:0005581]; extracellular space [GO:0005615]; integral component of membrane [GO:0016021]; protein heterotrimerization [GO:0070208]	-	NO
1	51853223	CCCAACTTGTACA	TCTAACCTTTACC	49603.8	202	398	404	0.985148	398	0	WA_WD_W1	0:49,0:61,0:89	.:GG-WUR-108_GG-WUR-068_GG-WUR-154_GG-WUR-042_GG-WUR-121_GG-WUR-156_GG-WUR-059_GG-WUR-116_GG-WUR-120_GG-WUR-036_GG-WUR-239_GG-WUR-051_GG-WUR-092_GG-WUR-163_GG-WUR-069_GG-WUR-130_GG-WUR-238_GG-WUR-236_GG-WUR-123_GG-WUR-055_GG-WUR-263_GG-WUR-175_GG-WUR-118_GG-WUR-259_GG-WUR-111_GG-WUR-254_GG-WUR-134_GG-WUR-119_GG-WUR-088_GG-WUR-090_GG-WUR-096_GG-WUR-136_GG-WUR-240_GG-WUR-160_GG-WUR-135_GG-WUR-164_G…	246	51|11|0	missense_variant	MODERATE	MYH9	ENSGALG00000043092	ENSGALT00000046939	19/41	-	2302-2314	2251-2263	751-755	PNLYR/SNLYR	CCCAACTTGTACAga/TCTAACCTTTACCga	-	-	-4.077	PROSITE_profiles:PS51456&PTHR13140:SF317&PTHR13140&Pfam_domain:PF00063&SMART_domains:SM00242&Superfamily_domains:SSF52540	myosin complex [GO:0016459]; ATP binding [GO:0005524]; motor activity [GO:0003774]	embryo,muscle,immune,growth/size/body,hearing/vestibular/ear,renal/urinary,vision/eye,hematopoietic,cellular,no abnormal phenotype observed,mortality/aging,nervous system,homeostasis,cardiovascular	NO
1	51863303	TTGATG	ATCGCT	83090.3	236	472	472	1	472	0	WA_WD_W1	0:64,0:74,0:98	.:GG-WUR-108_GG-WUR-262_GG-WUR-068_GG-WUR-154_GG-WUR-042_GG-WUR-156_GG-WUR-059_GG-WUR-253_GG-WUR-116_GG-WUR-257_GG-WUR-113_GG-WUR-120_GG-WUR-117_GG-WUR-159_GG-WUR-258_GG-WUR-036_GG-WUR-256_GG-WUR-239_GG-WUR-051_GG-WUR-092_GG-WUR-163_GG-WUR-069_GG-WUR-130_GG-WUR-238_GG-WUR-123_GG-WUR-055_GG-WUR-263_GG-WUR-175_GG-WUR-050_GG-WUR-153_GG-WUR-118_GG-WUR-259_GG-WUR-252_GG-WUR-111_GG-WUR-254_GG-WUR-134_G…	18006	51|11|0	missense_variant	MODERATE	MYH9	ENSGALG00000043092	ENSGALT00000046939	31/41	-	4324-4329	4273-4278	1425-1426	LM/IA	TTGATG/ATCGCT	-	-	-2.563	Pfam_domain:PF01576&Superfamily_domains:SSF90257&Coiled-coils_(Ncoils):Coil	myosin complex [GO:0016459]; ATP binding [GO:0005524]; motor activity [GO:0003774]	embryo,muscle,immune,growth/size/body,hearing/vestibular/ear,renal/urinary,vision/eye,hematopoietic,cellular,no abnormal phenotype observed,mortality/aging,nervous system,homeostasis,cardiovascular	NO
1	54651807	C	G	128536	244	488	488	1	488	0	WA_WD_W1	0:67,0:78,0:99	.:GG-WUR-108_GG-WUR-262_GG-WUR-068_GG-WUR-154_GG-WUR-042_GG-WUR-114_GG-WUR-121_GG-WUR-156_GG-WUR-253_GG-WUR-116_GG-WUR-261_GG-WUR-257_GG-WUR-113_GG-WUR-120_GG-WUR-159_GG-WUR-258_GG-WUR-036_GG-WUR-162_GG-WUR-256_GG-WUR-239_GG-WUR-051_GG-WUR-092_GG-WUR-163_GG-WUR-069_GG-WUR-115_GG-WUR-130_GG-WUR-238_GG-WUR-236_GG-WUR-123_GG-WUR-055_GG-WUR-175_GG-WUR-050_GG-WUR-153_GG-WUR-118_GG-WUR-259_GG-WUR-252_G…	2588	51|5|2	missense_variant	MODERATE	TXNRD1	ENSGALG00000035345	ENSGALT00000048071	6/14	-	637	467	156	R/T	aGg/aCg	-	tolerated(0.51)	-2.741	PTHR22912&PTHR22912:SF129&3.50.50.60&Pfam_domain:PF07992&TIGRFAM_domain:TIGR01438&PIRSF_domain:PIRSF000350&Superfamily_domains:SSF51905&Prints_domain:PR00368	cell [GO:0005623]; flavin adenine dinucleotide binding [GO:0050660]; thioredoxin-disulfide reductase activity [GO:0004791]; cell redox homeostasis [GO:0045454]cell [GO:0005623]; flavin adenine dinucleotide binding [GO:0050660]; thioredoxin-disulfide reductase activity [GO:0004791]; cell redox homeostasis [GO:0045454]	embryo,behavior,growth/size/body,cellular,no abnormal phenotype observed,mortality/aging,nervous system	YES
1	55603214	CT	CTAAAGAT	76115.5	224	427	448	0.953125	406	21	WA_WD_W1	7:51,10:65,4:87	GG-WUR-108_GG-WUR-117_GG-WUR-175_GG-WUR-134_GG-WUR-136_GG-WUR-135_GG-WUR-129:GG-WUR-262_GG-WUR-068_GG-WUR-154_GG-WUR-042_GG-WUR-114_GG-WUR-121_GG-WUR-156_GG-WUR-059_GG-WUR-253_GG-WUR-116_GG-WUR-113_GG-WUR-120_GG-WUR-159_GG-WUR-036_GG-WUR-162_GG-WUR-239_GG-WUR-051_GG-WUR-092_GG-WUR-163_GG-WUR-069_GG-WUR-115_GG-WUR-130_GG-WUR-238_GG-WUR-236_GG-WUR-123_GG-WUR-055_GG-WUR-050_GG-WUR-153_GG-WUR-118_GG-…	6914	62|6|0	inframe_insertion	MODERATE	GNPTAB	ENSGALG00000012763	ENSGALT00000020826	13/21	-	2481	2481	827	P/PKD	ccT/ccTAAAGAT	-	-	1	-	integral component of membrane [GO:0016021]; calcium ion binding [GO:0005509]; transferase activity, transferring phosphorus-containing groups [GO:0016772]Golgi membrane [GO:0000139]; integral component of membrane [GO:0016021]; calcium ion binding [GO:0005509]; UDP-N-acetylglucosamine-lysosomal-enzyme N-acetylglucosaminephosphotransferase activity [GO:0003976]; carbohydrate phosphorylation [GO:0…	respiratory,skeleton,reproductive,craniofacial,endocrine/exocrine,immune,renal/urinary,muscle,vision/eye,hematopoietic,behavior,mortality/aging,integument,nervous system,cellular,growth/size/body,homeostasis,digestive/alimentary	YES
1	60366831	T	A	143418	249	498	498	1	498	0	WA_WD_W1	0:71,0:78,0:100	.:GG-WUR-108_GG-WUR-262_GG-WUR-068_GG-WUR-154_GG-WUR-042_GG-WUR-114_GG-WUR-121_GG-WUR-156_GG-WUR-059_GG-WUR-253_GG-WUR-116_GG-WUR-261_GG-WUR-257_GG-WUR-113_GG-WUR-120_GG-WUR-117_GG-WUR-159_GG-WUR-258_GG-WUR-036_GG-WUR-162_GG-WUR-256_GG-WUR-239_GG-WUR-051_GG-WUR-092_GG-WUR-163_GG-WUR-069_GG-WUR-115_GG-WUR-130_GG-WUR-238_GG-WUR-236_GG-WUR-123_GG-WUR-055_GG-WUR-263_GG-WUR-175_GG-WUR-050_GG-WUR-153_G…	-62	0|0|0	splice_acceptor_variant&non_coding_transcript_variant	HIGH	-	ENSGALG00000034718	ENSGALT00000047181	-	1/1	-	-	-	-	-	-	-	NA	-		-	YES
1	70502586	C	G	97273.1	242	467	484	0.964876	452	15	WA_WD_W1	6:62,0:77,9:87	GG-WUR-154_GG-WUR-113_GG-WUR-092_GG-WUR-088_GG-WUR-039_GG-WUR-035:GG-WUR-108_GG-WUR-262_GG-WUR-068_GG-WUR-042_GG-WUR-114_GG-WUR-121_GG-WUR-156_GG-WUR-059_GG-WUR-253_GG-WUR-116_GG-WUR-261_GG-WUR-257_GG-WUR-120_GG-WUR-117_GG-WUR-159_GG-WUR-258_GG-WUR-036_GG-WUR-162_GG-WUR-256_GG-WUR-239_GG-WUR-051_GG-WUR-163_GG-WUR-069_GG-WUR-115_GG-WUR-130_GG-WUR-238_GG-WUR-236_GG-WUR-123_GG-WUR-055_GG-WUR-175_GG-…	345	58|2|0	missense_variant	MODERATE	RIBC2	ENSGALG00000014232	ENSGALT00000023012	5/7	-	770	770	257	P/R	cCt/cGt	-	deleterious(0.03)	-8.016	PTHR14517:SF10&PTHR14517&Pfam_domain:PF05914	-	-	YES
1	77135010	G	A	106696	246	486	492	0.987805	480	6	WA_WD_W1	0:70,0:75,6:95	.:GG-WUR-108_GG-WUR-262_GG-WUR-068_GG-WUR-154_GG-WUR-042_GG-WUR-114_GG-WUR-121_GG-WUR-156_GG-WUR-059_GG-WUR-253_GG-WUR-116_GG-WUR-261_GG-WUR-257_GG-WUR-113_GG-WUR-120_GG-WUR-117_GG-WUR-159_GG-WUR-258_GG-WUR-036_GG-WUR-162_GG-WUR-256_GG-WUR-239_GG-WUR-051_GG-WUR-092_GG-WUR-163_GG-WUR-069_GG-WUR-115_GG-WUR-130_GG-WUR-238_GG-WUR-236_GG-WUR-123_GG-WUR-055_GG-WUR-263_GG-WUR-175_GG-WUR-050_GG-WUR-153_G…	125	0|0|0	splice_donor_variant&non_coding_transcript_variant	HIGH	-	ENSGALG00000038075	ENSGALT00000067626	-	1/1	-	-	-	-	-	-	-	NA	-		-	YES
1	78120815	T	G	105820	249	469	498	0.941767	440	29	WA_WD_W1	0:71,13:64,16:85	.:GG-WUR-108_GG-WUR-262_GG-WUR-068_GG-WUR-154_GG-WUR-042_GG-WUR-114_GG-WUR-121_GG-WUR-156_GG-WUR-059_GG-WUR-253_GG-WUR-116_GG-WUR-261_GG-WUR-257_GG-WUR-113_GG-WUR-120_GG-WUR-117_GG-WUR-159_GG-WUR-258_GG-WUR-036_GG-WUR-162_GG-WUR-256_GG-WUR-239_GG-WUR-051_GG-WUR-092_GG-WUR-163_GG-WUR-069_GG-WUR-115_GG-WUR-130_GG-WUR-238_GG-WUR-236_GG-WUR-123_GG-WUR-055_GG-WUR-263_GG-WUR-175_GG-WUR-050_GG-WUR-153_G…	665	0|0|0	missense_variant	MODERATE	-	ENSGALG00000037804	ENSGALT00000069105	2/2	-	137	137	46	Y/S	tAc/tCc	-	tolerated(0.17)	-6.044	PTHR23268:SF17&PTHR23268&Pfam_domain:PF07686&2.60.40.10&SMART_domains:SM00406&SMART_domains:SM00409&Superfamily_domains:SSF48726		-	YES
1	79383015	G	A	101695	243	486	486	1	486	0	WA_WD_W1	0:67,0:76,0:100	.:GG-WUR-108_GG-WUR-262_GG-WUR-068_GG-WUR-154_GG-WUR-042_GG-WUR-114_GG-WUR-121_GG-WUR-156_GG-WUR-059_GG-WUR-253_GG-WUR-116_GG-WUR-257_GG-WUR-113_GG-WUR-120_GG-WUR-117_GG-WUR-159_GG-WUR-036_GG-WUR-162_GG-WUR-256_GG-WUR-239_GG-WUR-051_GG-WUR-092_GG-WUR-163_GG-WUR-069_GG-WUR-115_GG-WUR-130_GG-WUR-238_GG-WUR-236_GG-WUR-123_GG-WUR-055_GG-WUR-263_GG-WUR-175_GG-WUR-050_GG-WUR-153_GG-WUR-118_GG-WUR-259_G…	528	56|0|0	missense_variant	MODERATE	CTC1	ENSGALG00000032036	ENSGALT00000068191	14/23	-	2288	2288	763	P/L	cCa/cTa	-	tolerated(0.05)	-3.554	PTHR14865&Pfam_domain:PF15489	single-stranded DNA binding [GO:0003697]	growth/size/body,endocrine/exocrine,immune,hematopoietic,cellular,mortality/aging,integument,homeostasis	YES
1	84147062	AATCT	AATCC	108320	238	476	476	1	476	0	WA_WD_W1	0:64,0:77,0:97	.:GG-WUR-108_GG-WUR-262_GG-WUR-068_GG-WUR-154_GG-WUR-042_GG-WUR-121_GG-WUR-156_GG-WUR-059_GG-WUR-116_GG-WUR-261_GG-WUR-113_GG-WUR-120_GG-WUR-117_GG-WUR-159_GG-WUR-036_GG-WUR-162_GG-WUR-239_GG-WUR-051_GG-WUR-092_GG-WUR-163_GG-WUR-069_GG-WUR-115_GG-WUR-130_GG-WUR-238_GG-WUR-236_GG-WUR-123_GG-WUR-055_GG-WUR-263_GG-WUR-175_GG-WUR-050_GG-WUR-153_GG-WUR-118_GG-WUR-259_GG-WUR-111_GG-WUR-254_GG-WUR-134_G…	465	62|13|0	missense_variant	MODERATE	TTF2	ENSGALG00000015249	ENSGALT00000036922	16/24	-	2510-2514	2510-2514	837-838	QS/LS	cAATCT/cTATCC	-	-	-5.25	PTHR10799:SF573&PTHR10799&Pfam_domain:PF00176&Superfamily_domains:SSF52540	cytoplasm [GO:0005737]; ATP binding [GO:0005524]; zinc ion binding [GO:0008270]	craniofacial,endocrine/exocrine,mortality/aging,integument,growth/size/body,homeostasis,digestive/alimentary	YES
1	85359144	AA	AAGCA	104820	244	463	488	0.94877	440	23	WA_WD_W1	5:66,17:58,1:96	GG-WUR-153_GG-WUR-135_GG-WUR-129_GG-WUR-053_GG-WUR-052:GG-WUR-108_GG-WUR-262_GG-WUR-068_GG-WUR-154_GG-WUR-042_GG-WUR-114_GG-WUR-121_GG-WUR-156_GG-WUR-059_GG-WUR-253_GG-WUR-116_GG-WUR-261_GG-WUR-257_GG-WUR-113_GG-WUR-120_GG-WUR-117_GG-WUR-159_GG-WUR-258_GG-WUR-036_GG-WUR-162_GG-WUR-256_GG-WUR-239_GG-WUR-051_GG-WUR-092_GG-WUR-163_GG-WUR-069_GG-WUR-115_GG-WUR-130_GG-WUR-238_GG-WUR-236_GG-WUR-123_GG-…	814	61|8|0	inframe_insertion	MODERATE	CEP97	ENSGALG00000015342	ENSGALT00000024760	11/11	-	2245	2245	749	R/SR	Aga/AGCAga	-	-	1	-	centrosome [GO:0005813]; cytoplasm [GO:0005737]; protein complex [GO:0043234]; negative regulation of cilium assembly [GO:1902018]; regulation of mitotic spindle assembly [GO:1901673]	mortality/aging	YES
1	87315292	GAGTGTTTTTTTC	GATTGCTGTTTTTTC	68875	201	402	402	1	402	0	WA_WD_W1	0:48,0:65,0:88	.:GG-WUR-108_GG-WUR-068_GG-WUR-154_GG-WUR-042_GG-WUR-121_GG-WUR-156_GG-WUR-059_GG-WUR-116_GG-WUR-261_GG-WUR-113_GG-WUR-120_GG-WUR-036_GG-WUR-051_GG-WUR-092_GG-WUR-115_GG-WUR-130_GG-WUR-238_GG-WUR-123_GG-WUR-055_GG-WUR-175_GG-WUR-050_GG-WUR-153_GG-WUR-118_GG-WUR-111_GG-WUR-254_GG-WUR-134_GG-WUR-119_GG-WUR-088_GG-WUR-147_GG-WUR-096_GG-WUR-136_GG-WUR-240_GG-WUR-160_GG-WUR-135_GG-WUR-164_GG-WUR-039_G…	915	63|4|0	frameshift_variant	HIGH	BBX	ENSGALG00000015353	ENSGALT00000072724	5/13	-	773-785	773-785	258-262	GVFFS/GLLFFX	gGAGTGTTTTTTTCc/gGATTGCTGTTTTTTCc	-	-	NA	Pfam_domain:PF09667&PTHR13059	cytoplasm [GO:0005737]; nucleoplasm [GO:0005654]; DNA binding [GO:0003677]; bone development [GO:0060348]	skeleton,craniofacial,immune,growth/size/body,hematopoietic,cardiovascular	NO
1	88293648	ATT	ATTT	104499	246	444	492	0.902439	396	48	WA_WD_W1	11:59,17:61,20:78	GG-WUR-257_GG-WUR-258_GG-WUR-036_GG-WUR-069_GG-WUR-236_GG-WUR-050_GG-WUR-122_GG-WUR-135_GG-WUR-164_GG-WUR-251_GG-WUR-060:GG-WUR-108_GG-WUR-262_GG-WUR-068_GG-WUR-154_GG-WUR-042_GG-WUR-114_GG-WUR-121_GG-WUR-156_GG-WUR-059_GG-WUR-253_GG-WUR-116_GG-WUR-261_GG-WUR-113_GG-WUR-120_GG-WUR-117_GG-WUR-159_GG-WUR-162_GG-WUR-256_GG-WUR-239_GG-WUR-051_GG-WUR-092_GG-WUR-163_GG-WUR-115_GG-WUR-130_GG-WUR-123_GG-…	955	51|28|0	frameshift_variant	HIGH	NECTIN3	ENSGALG00000015367	ENSGALT00000024797	10/11	-	1940-1941	1940-1941	647	I/IX	aTT/aTTT	-	-	NA	-	apical junction complex [GO:0043296]; cell-cell adherens junction [GO:0005913]; cell-cell contact zone [GO:0044291]; integral component of plasma membrane [GO:0005887]; cell adhesion molecule binding [GO:0050839]; protein homodimerization activity [GO:0042803]; receptor activity [GO:0004872]; receptor binding [GO:0005102]; cell recognition [GO:0008037]; fertilization [GO:0009566]; heterophilic ce…	craniofacial,vision/eye,growth/size/body,reproductive	NO
1	92519579	T	A	115847	241	482	482	1	482	0	WA_WD_W1	0:67,0:77,0:97	.:GG-WUR-108_GG-WUR-262_GG-WUR-068_GG-WUR-154_GG-WUR-042_GG-WUR-114_GG-WUR-121_GG-WUR-156_GG-WUR-059_GG-WUR-253_GG-WUR-116_GG-WUR-261_GG-WUR-257_GG-WUR-113_GG-WUR-120_GG-WUR-117_GG-WUR-159_GG-WUR-258_GG-WUR-036_GG-WUR-162_GG-WUR-256_GG-WUR-239_GG-WUR-051_GG-WUR-092_GG-WUR-163_GG-WUR-069_GG-WUR-115_GG-WUR-130_GG-WUR-238_GG-WUR-236_GG-WUR-123_GG-WUR-055_GG-WUR-263_GG-WUR-175_GG-WUR-050_GG-WUR-153_G…	1530	57|14|0	missense_variant	MODERATE	PDZK1	ENSGALG00000015492	ENSGALT00000024985	4/8	-	719	719	240	H/L	cAt/cTt	-	tolerated(0.87)	-3.265	PTHR14191:SF6&PTHR14191&2.30.42.10&Superfamily_domains:SSF50156	extracellular exosome [GO:0070062]; carnitine transport [GO:0015879]; positive regulation of ion transmembrane transport [GO:0034767]	liver/biliary,immune,hematopoietic,homeostasis	YES
1	105240877	GAA	GAAA	87938	247	464	494	0.939271	434	30	WA_WD_W1	6:65,14:64,10:88	GG-WUR-113_GG-WUR-163_GG-WUR-111_GG-WUR-096_GG-WUR-240_GG-WUR-052:GG-WUR-108_GG-WUR-262_GG-WUR-068_GG-WUR-154_GG-WUR-042_GG-WUR-114_GG-WUR-121_GG-WUR-156_GG-WUR-059_GG-WUR-253_GG-WUR-116_GG-WUR-261_GG-WUR-257_GG-WUR-120_GG-WUR-117_GG-WUR-159_GG-WUR-258_GG-WUR-036_GG-WUR-162_GG-WUR-256_GG-WUR-239_GG-WUR-051_GG-WUR-092_GG-WUR-069_GG-WUR-115_GG-WUR-130_GG-WUR-238_GG-WUR-236_GG-WUR-123_GG-WUR-055_GG-…	1487	45|6|0	frameshift_variant	HIGH	IFNAR2	ENSGALG00000041867	ENSGALT00000046822	3/10	-	320-321	2017-07-06	2-mrt	GT/GNX	ggAAca/ggAAAca	-	-	NA	PTHR20859&PTHR20859:SF53&Cleavage_site_(Signalp):SignalP-noTM	integral component of membrane [GO:0016021]; blood coagulation [GO:0007596]integral component of membrane [GO:0016021]; blood coagulation [GO:0007596]	immune,neoplasm,homeostasis,hematopoietic	NO
1	118472409	CTTTTTTTTTTTA	CTTTTTTTTTTTTA	56548.8	233	448	466	0.961373	430	18	WA_WD_W1	7:61,6:66,5:88	GG-WUR-262_GG-WUR-163_GG-WUR-263_GG-WUR-254_GG-WUR-240_GG-WUR-260_GG-WUR-251:GG-WUR-108_GG-WUR-068_GG-WUR-154_GG-WUR-042_GG-WUR-114_GG-WUR-121_GG-WUR-156_GG-WUR-059_GG-WUR-253_GG-WUR-116_GG-WUR-261_GG-WUR-257_GG-WUR-113_GG-WUR-120_GG-WUR-117_GG-WUR-159_GG-WUR-258_GG-WUR-036_GG-WUR-162_GG-WUR-256_GG-WUR-051_GG-WUR-092_GG-WUR-069_GG-WUR-115_GG-WUR-130_GG-WUR-238_GG-WUR-236_GG-WUR-123_GG-WUR-055_GG-…	-55	0|0|0	splice_acceptor_variant&non_coding_transcript_variant	HIGH	-	ENSGALG00000036226	ENSGALT00000064237	-	2/3	-	-	-	-	-	-	-	NA	-		-	YES
1	122358799	AA	AG	70393.5	208	399	416	0.959135	382	17	WA_WD_W1	0:53,8:56,9:82	.:GG-WUR-108_GG-WUR-068_GG-WUR-154_GG-WUR-042_GG-WUR-114_GG-WUR-121_GG-WUR-156_GG-WUR-059_GG-WUR-116_GG-WUR-261_GG-WUR-120_GG-WUR-159_GG-WUR-258_GG-WUR-036_GG-WUR-239_GG-WUR-051_GG-WUR-092_GG-WUR-163_GG-WUR-069_GG-WUR-130_GG-WUR-238_GG-WUR-123_GG-WUR-055_GG-WUR-050_GG-WUR-153_GG-WUR-118_GG-WUR-259_GG-WUR-111_GG-WUR-134_GG-WUR-119_GG-WUR-122_GG-WUR-088_GG-WUR-147_GG-WUR-090_GG-WUR-096_GG-WUR-240_G…	329	61|4|0	missense_variant	MODERATE	FANCB	ENSGALG00000016569	ENSGALT00000026744	9/9	-	2698-2699	2698-2699	900	N/S	AAt/AGt	-	tolerated(1)	-2.696	PTHR28450	Fanconi anaemia nuclear complex [GO:0043240]	growth/size/body,reproductive,homeostasis,cellular,endocrine/exocrine	NO
1	130100498	TGT	CGT	78293.7	222	444	444	1	444	0	WA_WD_W1	0:62,0:70,0:90	.:GG-WUR-108_GG-WUR-262_GG-WUR-154_GG-WUR-042_GG-WUR-114_GG-WUR-121_GG-WUR-156_GG-WUR-059_GG-WUR-253_GG-WUR-261_GG-WUR-257_GG-WUR-113_GG-WUR-120_GG-WUR-117_GG-WUR-159_GG-WUR-258_GG-WUR-162_GG-WUR-256_GG-WUR-239_GG-WUR-051_GG-WUR-092_GG-WUR-163_GG-WUR-115_GG-WUR-130_GG-WUR-238_GG-WUR-236_GG-WUR-123_GG-WUR-055_GG-WUR-175_GG-WUR-050_GG-WUR-153_GG-WUR-252_GG-WUR-111_GG-WUR-134_GG-WUR-119_GG-WUR-122_G…	-53	46|12|0	splice_donor_variant&coding_sequence_variant	HIGH	GTPBP6	ENSGALG00000016717	ENSGALT00000026979	1/11	1/10	2-?	2-?	1-?	-	-	-	-	NA	-	cytoplasm [GO:0005737]; GTP binding [GO:0005525]; ribosome binding [GO:0043022]	-	YES
1	132465266	GCCT	GCCC	85047.4	226	452	452	1	452	0	WA_WD_W1	0:62,0:73,0:91	.:GG-WUR-108_GG-WUR-068_GG-WUR-154_GG-WUR-042_GG-WUR-114_GG-WUR-121_GG-WUR-156_GG-WUR-059_GG-WUR-253_GG-WUR-116_GG-WUR-261_GG-WUR-113_GG-WUR-120_GG-WUR-117_GG-WUR-159_GG-WUR-258_GG-WUR-036_GG-WUR-162_GG-WUR-239_GG-WUR-051_GG-WUR-092_GG-WUR-163_GG-WUR-069_GG-WUR-115_GG-WUR-130_GG-WUR-238_GG-WUR-236_GG-WUR-123_GG-WUR-055_GG-WUR-175_GG-WUR-050_GG-WUR-153_GG-WUR-118_GG-WUR-111_GG-WUR-134_GG-WUR-119_G…	796	45|8|0	missense_variant	MODERATE	KIAA1211L	ENSGALG00000016755	ENSGALT00000027054	5/12	-	541-544	541-544	181-182	RH/GH	AGGCat/GGGCat	-	-	-6.953	Pfam_domain:PF15262&PTHR22118&PTHR22118:SF16	-	immune,hematopoietic	NO
1	132552337	C	T	95221.1	229	458	458	1	458	0	WA_WD_W1	0:61,0:74,0:94	.:GG-WUR-108_GG-WUR-262_GG-WUR-068_GG-WUR-154_GG-WUR-042_GG-WUR-121_GG-WUR-156_GG-WUR-059_GG-WUR-253_GG-WUR-116_GG-WUR-261_GG-WUR-257_GG-WUR-113_GG-WUR-120_GG-WUR-117_GG-WUR-159_GG-WUR-036_GG-WUR-162_GG-WUR-256_GG-WUR-239_GG-WUR-051_GG-WUR-092_GG-WUR-163_GG-WUR-069_GG-WUR-115_GG-WUR-130_GG-WUR-238_GG-WUR-236_GG-WUR-123_GG-WUR-055_GG-WUR-175_GG-WUR-050_GG-WUR-153_GG-WUR-118_GG-WUR-259_GG-WUR-111_G…	523	63|2|0	missense_variant	MODERATE	MITD1	ENSGALG00000016759	ENSGALT00000027060	6/7	-	788	637	213	D/N	Gat/Aat	-	tolerated(0.05)	-4.629	Pfam_domain:PF16565&PTHR21222	extracellular exosome [GO:0070062]; extrinsic component of membrane [GO:0019898]; intracellular membrane-bounded organelle [GO:0043231]; midbody [GO:0030496]; phosphatidylinositol binding [GO:0035091]; cell separation after cytokinesis [GO:0000920]; mitotic cytokinesis [GO:0000281]; negative regulation of protein binding [GO:0032091]	-	YES
1	132560289	G	C	94334.7	236	472	472	1	472	0	WA_WD_W1	0:66,0:74,0:96	.:GG-WUR-108_GG-WUR-262_GG-WUR-068_GG-WUR-154_GG-WUR-042_GG-WUR-121_GG-WUR-156_GG-WUR-059_GG-WUR-253_GG-WUR-116_GG-WUR-261_GG-WUR-113_GG-WUR-120_GG-WUR-117_GG-WUR-159_GG-WUR-036_GG-WUR-162_GG-WUR-256_GG-WUR-239_GG-WUR-051_GG-WUR-092_GG-WUR-163_GG-WUR-069_GG-WUR-115_GG-WUR-130_GG-WUR-238_GG-WUR-236_GG-WUR-123_GG-WUR-055_GG-WUR-175_GG-WUR-050_GG-WUR-153_GG-WUR-118_GG-WUR-259_GG-WUR-111_GG-WUR-254_G…	257	0|0|0	splice_acceptor_variant&non_coding_transcript_variant	HIGH	-	ENSGALG00000043257	ENSGALT00000069728	-	1/1	-	-	-	-	-	-	-	NA	-		-	YES
1	136420977	GGG	GGA	102246	244	487	488	0.997951	486	1	WA_WD_W1	0:67,0:77,1:99	.:GG-WUR-108_GG-WUR-262_GG-WUR-068_GG-WUR-154_GG-WUR-042_GG-WUR-114_GG-WUR-121_GG-WUR-156_GG-WUR-059_GG-WUR-253_GG-WUR-116_GG-WUR-257_GG-WUR-113_GG-WUR-120_GG-WUR-117_GG-WUR-159_GG-WUR-258_GG-WUR-036_GG-WUR-162_GG-WUR-256_GG-WUR-239_GG-WUR-051_GG-WUR-092_GG-WUR-163_GG-WUR-069_GG-WUR-115_GG-WUR-130_GG-WUR-238_GG-WUR-236_GG-WUR-123_GG-WUR-055_GG-WUR-175_GG-WUR-050_GG-WUR-153_GG-WUR-118_GG-WUR-259_G…	3791	54|6|2	missense_variant	MODERATE	-	ENSGALG00000016808	ENSGALT00000036568	10/23	-	1422-1424	1422-1424	474-475	GG/GE	ggGGGa/ggGGAa	-	-	-3.389	PTHR23138&PTHR23138:SF100	annulate lamellae [GO:0005642]; microtubule associated complex [GO:0005875]; mitochondrion [GO:0005739]; nuclear inclusion body [GO:0042405]; nuclear membrane [GO:0031965]; nuclear pore [GO:0005643]; nuclear pore cytoplasmic filaments [GO:0044614]; nuclear pore nuclear basket [GO:0044615]; peptidyl-prolyl cis-trans isomerase activity [GO:0003755]; Ran GTPase binding [GO:0008536]; zinc ion binding…	-	NO
1	137193690	C	T	130670	249	498	498	1	498	0	WA_WD_W1	0:71,0:78,0:100	.:GG-WUR-108_GG-WUR-262_GG-WUR-068_GG-WUR-154_GG-WUR-042_GG-WUR-114_GG-WUR-121_GG-WUR-156_GG-WUR-059_GG-WUR-253_GG-WUR-116_GG-WUR-261_GG-WUR-257_GG-WUR-113_GG-WUR-120_GG-WUR-117_GG-WUR-159_GG-WUR-258_GG-WUR-036_GG-WUR-162_GG-WUR-256_GG-WUR-239_GG-WUR-051_GG-WUR-092_GG-WUR-163_GG-WUR-069_GG-WUR-115_GG-WUR-130_GG-WUR-238_GG-WUR-236_GG-WUR-123_GG-WUR-055_GG-WUR-263_GG-WUR-175_GG-WUR-050_GG-WUR-153_G…	3226	56|0|0	missense_variant	MODERATE	GAS6	ENSGALG00000016820	ENSGALT00000027154	8/15	-	680	680	227	S/L	tCa/tTa	-	tolerated(0.45)	-3.755	PTHR24035&PTHR24035:SF104&PS00010&PS01187&2.10.25.10&Pfam_domain:PF07645&SMART_domains:SM00181&SMART_domains:SM00179&Superfamily_domains:SSF49899	extracellular region [GO:0005576]; calcium ion binding [GO:0005509]extracellular region [GO:0005576]; calcium ion binding [GO:0005509]	behavior,hearing/vestibular/ear,renal/urinary,hematopoietic,cellular,mortality/aging,homeostasis,cardiovascular	YES
1	144631612	CTGT	CT	79786	236	440	472	0.932203	416	24	WA_WD_W1	15:46,9:64,0:98	GG-WUR-068_GG-WUR-156_GG-WUR-253_GG-WUR-116_GG-WUR-257_GG-WUR-117_GG-WUR-238_GG-WUR-055_GG-WUR-050_GG-WUR-118_GG-WUR-119_GG-WUR-122_GG-WUR-135_GG-WUR-129_GG-WUR-060:GG-WUR-108_GG-WUR-262_GG-WUR-154_GG-WUR-042_GG-WUR-114_GG-WUR-059_GG-WUR-113_GG-WUR-120_GG-WUR-159_GG-WUR-258_GG-WUR-036_GG-WUR-256_GG-WUR-051_GG-WUR-092_GG-WUR-163_GG-WUR-069_GG-WUR-115_GG-WUR-130_GG-WUR-123_GG-WUR-263_GG-WUR-175_GG-…	1262	49|13|2	frameshift_variant	HIGH	UBAC2	ENSGALG00000016880	ENSGALT00000075910	5/5	-	491-493	424-426	142	T/X	ACA/A	-	-	NA	-	endoplasmic reticulum membrane [GO:0005789]; integral component of membrane [GO:0016021]; ubiquitin binding [GO:0043130]endoplasmic reticulum [GO:0005783]; integral component of membrane [GO:0016021]; negative regulation of retrograde protein transport, ER to cytosol [GO:1904153]; protein localization to endoplasmic reticulum [GO:0070972]integral component of membrane [GO:0016021]	-	NO
1	156240667	ATTTTTTA	ATTTTTTTTA	86030.3	233	466	466	1	466	0	WA_WD_W1	0:66,0:76,0:91	.:GG-WUR-108_GG-WUR-262_GG-WUR-068_GG-WUR-154_GG-WUR-042_GG-WUR-114_GG-WUR-121_GG-WUR-156_GG-WUR-059_GG-WUR-253_GG-WUR-116_GG-WUR-113_GG-WUR-120_GG-WUR-159_GG-WUR-258_GG-WUR-036_GG-WUR-162_GG-WUR-239_GG-WUR-051_GG-WUR-092_GG-WUR-163_GG-WUR-069_GG-WUR-115_GG-WUR-130_GG-WUR-238_GG-WUR-236_GG-WUR-123_GG-WUR-055_GG-WUR-263_GG-WUR-175_GG-WUR-050_GG-WUR-153_GG-WUR-118_GG-WUR-252_GG-WUR-111_GG-WUR-254_G…	915	64|27|0	splice_acceptor_variant&intron_variant	HIGH	DIS3	ENSGALG00000016930	ENSGALT00000027368	-	10/20	-	-	-	-	-	-	-	NA	-	cytoplasmic exosome (RNase complex) [GO:0000177]; membrane [GO:0016020]; nuclear exosome (RNase complex) [GO:0000176]; nucleoplasm [GO:0005654]; 3'-5'-exoribonuclease activity [GO:0000175]; endonuclease activity [GO:0004519]; guanyl-nucleotide exchange factor activity [GO:0005085]; CUT catabolic process [GO:0071034]; mRNA catabolic process [GO:0006402]; rRNA catabolic process [GO:0016075]; rRNA p…	mortality/aging,vision/eye	NO
1	161818816	G	C	110912	246	468	492	0.951219	446	22	WA_WD_W1	0:70,22:55,0:98	.:GG-WUR-108_GG-WUR-262_GG-WUR-068_GG-WUR-154_GG-WUR-042_GG-WUR-114_GG-WUR-121_GG-WUR-156_GG-WUR-059_GG-WUR-253_GG-WUR-116_GG-WUR-261_GG-WUR-257_GG-WUR-113_GG-WUR-120_GG-WUR-117_GG-WUR-159_GG-WUR-258_GG-WUR-036_GG-WUR-162_GG-WUR-256_GG-WUR-239_GG-WUR-051_GG-WUR-092_GG-WUR-163_GG-WUR-069_GG-WUR-115_GG-WUR-130_GG-WUR-238_GG-WUR-236_GG-WUR-123_GG-WUR-055_GG-WUR-263_GG-WUR-175_GG-WUR-050_GG-WUR-153_G…	-80	0|0|0	splice_donor_variant&non_coding_transcript_variant	HIGH	-	ENSGALG00000030557	ENSGALT00000059105	-	1/2	-	-	-	-	-	-	-	NA	-		-	YES
1	165562539	C	G	131344	247	494	494	1	494	0	WA_WD_W1	0:70,0:78,0:99	.:GG-WUR-108_GG-WUR-262_GG-WUR-068_GG-WUR-154_GG-WUR-042_GG-WUR-114_GG-WUR-121_GG-WUR-156_GG-WUR-059_GG-WUR-253_GG-WUR-116_GG-WUR-261_GG-WUR-257_GG-WUR-113_GG-WUR-120_GG-WUR-117_GG-WUR-159_GG-WUR-258_GG-WUR-036_GG-WUR-162_GG-WUR-256_GG-WUR-239_GG-WUR-051_GG-WUR-092_GG-WUR-163_GG-WUR-069_GG-WUR-115_GG-WUR-130_GG-WUR-238_GG-WUR-236_GG-WUR-123_GG-WUR-055_GG-WUR-263_GG-WUR-175_GG-WUR-050_GG-WUR-153_G…	7569	51|26|2	missense_variant	MODERATE	OLFM4	ENSGALG00000016943	ENSGALT00000027385	6/6	-	911	911	304	R/T	aGa/aCa	-	tolerated(0.16)	-4.315	PROSITE_profiles:PS51132&PTHR23192:SF7&PTHR23192&Pfam_domain:PF02191&SMART_domains:SM00284	extracellular exosome [GO:0070062]; extracellular space [GO:0005615]; perinuclear region of cytoplasm [GO:0048471]; plasma membrane [GO:0005886]; specific granule [GO:0042581]; positive regulation of substrate adhesion-dependent cell spreading [GO:1900026]; protein homooligomerization [GO:0051260]	immune,homeostasis,digestive/alimentary	YES
1	165562618	A	C	111646	247	494	494	1	494	0	WA_WD_W1	0:70,0:78,0:99	.:GG-WUR-108_GG-WUR-262_GG-WUR-068_GG-WUR-154_GG-WUR-042_GG-WUR-114_GG-WUR-121_GG-WUR-156_GG-WUR-059_GG-WUR-253_GG-WUR-116_GG-WUR-261_GG-WUR-257_GG-WUR-113_GG-WUR-120_GG-WUR-117_GG-WUR-159_GG-WUR-258_GG-WUR-036_GG-WUR-162_GG-WUR-256_GG-WUR-239_GG-WUR-051_GG-WUR-092_GG-WUR-163_GG-WUR-069_GG-WUR-115_GG-WUR-130_GG-WUR-238_GG-WUR-236_GG-WUR-123_GG-WUR-055_GG-WUR-263_GG-WUR-175_GG-WUR-050_GG-WUR-153_G…	9672	51|26|2	missense_variant	MODERATE	OLFM4	ENSGALG00000016943	ENSGALT00000027385	6/6	-	832	832	278	S/A	Tct/Gct	-	deleterious(0.01)	-2.007	PROSITE_profiles:PS51132&PTHR23192:SF7&PTHR23192&Pfam_domain:PF02191&SMART_domains:SM00284	extracellular exosome [GO:0070062]; extracellular space [GO:0005615]; perinuclear region of cytoplasm [GO:0048471]; plasma membrane [GO:0005886]; specific granule [GO:0042581]; positive regulation of substrate adhesion-dependent cell spreading [GO:1900026]; protein homooligomerization [GO:0051260]	immune,homeostasis,digestive/alimentary	YES
1	167393195	C	T	113292	248	496	496	1	496	0	WA_WD_W1	0:71,0:78,0:99	.:GG-WUR-108_GG-WUR-262_GG-WUR-068_GG-WUR-154_GG-WUR-042_GG-WUR-114_GG-WUR-121_GG-WUR-156_GG-WUR-059_GG-WUR-253_GG-WUR-116_GG-WUR-261_GG-WUR-257_GG-WUR-113_GG-WUR-120_GG-WUR-117_GG-WUR-159_GG-WUR-258_GG-WUR-036_GG-WUR-162_GG-WUR-256_GG-WUR-239_GG-WUR-051_GG-WUR-092_GG-WUR-163_GG-WUR-069_GG-WUR-115_GG-WUR-130_GG-WUR-238_GG-WUR-236_GG-WUR-123_GG-WUR-055_GG-WUR-263_GG-WUR-175_GG-WUR-050_GG-WUR-153_G…	-56	0|0|0	splice_donor_variant&non_coding_transcript_variant	HIGH	-	ENSGALG00000036265	ENSGALT00000046374	-	1/3	-	-	-	-	-	-	-	NA	-		-	YES
1	168315747	T	C	92369.5	226	452	452	1	452	0	WA_WD_W1	0:61,0:69,0:96	.:GG-WUR-108_GG-WUR-068_GG-WUR-154_GG-WUR-042_GG-WUR-114_GG-WUR-121_GG-WUR-156_GG-WUR-059_GG-WUR-253_GG-WUR-116_GG-WUR-261_GG-WUR-257_GG-WUR-113_GG-WUR-120_GG-WUR-117_GG-WUR-159_GG-WUR-258_GG-WUR-036_GG-WUR-162_GG-WUR-256_GG-WUR-239_GG-WUR-051_GG-WUR-092_GG-WUR-115_GG-WUR-130_GG-WUR-238_GG-WUR-236_GG-WUR-123_GG-WUR-055_GG-WUR-175_GG-WUR-050_GG-WUR-153_GG-WUR-118_GG-WUR-259_GG-WUR-111_GG-WUR-134_G…	143	58|20|0	splice_acceptor_variant	HIGH	ESD	ENSGALG00000016991	ENSGALT00000065511	-	6/9	-	-	-	-	-	-	-	NA	-	cytoplasm [GO:0005737]; carboxylic ester hydrolase activity [GO:0052689]; S-formylglutathione hydrolase activity [GO:0018738]; formaldehyde catabolic process [GO:0046294]S-formylglutathione hydrolase activity [GO:0018738]; formaldehyde catabolic process [GO:0046294]cytoplasm [GO:0005737]; extracellular exosome [GO:0070062]; carboxylic ester hydrolase activity [GO:0052689]; S-formylglutathione hyd…	-	YES
1	169378695	A	G	107160	246	492	492	1	492	0	WA_WD_W1	0:70,0:76,0:100	.:GG-WUR-108_GG-WUR-262_GG-WUR-068_GG-WUR-154_GG-WUR-042_GG-WUR-114_GG-WUR-121_GG-WUR-156_GG-WUR-059_GG-WUR-253_GG-WUR-116_GG-WUR-261_GG-WUR-257_GG-WUR-113_GG-WUR-120_GG-WUR-117_GG-WUR-159_GG-WUR-036_GG-WUR-162_GG-WUR-256_GG-WUR-239_GG-WUR-051_GG-WUR-092_GG-WUR-163_GG-WUR-069_GG-WUR-115_GG-WUR-130_GG-WUR-238_GG-WUR-236_GG-WUR-123_GG-WUR-055_GG-WUR-263_GG-WUR-175_GG-WUR-050_GG-WUR-153_GG-WUR-118_G…	886	45|0|0	missense_variant	MODERATE	KCNRG	ENSGALG00000017012	ENSGALT00000030136	1/2	-	96	22	8	T/A	Act/Gct	-	tolerated(0.1)	-2.827	PTHR14499&PTHR14499:SF5&Pfam_domain:PF02214&3.30.710.10&SMART_domains:SM00225&Superfamily_domains:SSF54695	endoplasmic reticulum [GO:0005783]; negative regulation of delayed rectifier potassium channel activity [GO:1902260]; protein homooligomerization [GO:0051260]	-	YES
1	169378702	A	G	112187	246	492	492	1	492	0	WA_WD_W1	0:70,0:77,0:99	.:GG-WUR-108_GG-WUR-262_GG-WUR-068_GG-WUR-154_GG-WUR-042_GG-WUR-114_GG-WUR-121_GG-WUR-156_GG-WUR-059_GG-WUR-253_GG-WUR-116_GG-WUR-261_GG-WUR-257_GG-WUR-113_GG-WUR-120_GG-WUR-117_GG-WUR-159_GG-WUR-036_GG-WUR-162_GG-WUR-256_GG-WUR-239_GG-WUR-051_GG-WUR-092_GG-WUR-163_GG-WUR-069_GG-WUR-115_GG-WUR-130_GG-WUR-238_GG-WUR-236_GG-WUR-123_GG-WUR-055_GG-WUR-263_GG-WUR-175_GG-WUR-050_GG-WUR-153_GG-WUR-118_G…	906	45|0|0	missense_variant	MODERATE	KCNRG	ENSGALG00000017012	ENSGALT00000030136	1/2	-	103	29	10	N/S	aAt/aGt	-	tolerated(0.13)	-4.165	PTHR14499&PTHR14499:SF5&Pfam_domain:PF02214&3.30.710.10&SMART_domains:SM00225&Superfamily_domains:SSF54695	endoplasmic reticulum [GO:0005783]; negative regulation of delayed rectifier potassium channel activity [GO:1902260]; protein homooligomerization [GO:0051260]	-	YES
1	170412282	G	A	116142	238	476	476	1	476	0	WA_WD_W1	0:67,0:74,0:97	.:GG-WUR-108_GG-WUR-262_GG-WUR-068_GG-WUR-154_GG-WUR-042_GG-WUR-114_GG-WUR-121_GG-WUR-156_GG-WUR-059_GG-WUR-253_GG-WUR-116_GG-WUR-261_GG-WUR-257_GG-WUR-113_GG-WUR-120_GG-WUR-117_GG-WUR-159_GG-WUR-258_GG-WUR-162_GG-WUR-256_GG-WUR-239_GG-WUR-051_GG-WUR-092_GG-WUR-163_GG-WUR-069_GG-WUR-115_GG-WUR-130_GG-WUR-238_GG-WUR-236_GG-WUR-123_GG-WUR-055_GG-WUR-263_GG-WUR-175_GG-WUR-050_GG-WUR-153_GG-WUR-118_G…	327	49|24|0	missense_variant	MODERATE	CKAP2	ENSGALG00000017025	ENSGALT00000027509	4/9	-	1045	1013	338	P/L	cCg/cTg	-	tolerated(0.06)	-5.155	Pfam_domain:PF15297&PTHR16076&PTHR16076:SF8	-	-	YES
1	170534419	C	T	97861.5	232	461	464	0.993535	458	3	WA_WD_W1	0:61,0:75,3:93	.:GG-WUR-108_GG-WUR-262_GG-WUR-068_GG-WUR-154_GG-WUR-042_GG-WUR-114_GG-WUR-121_GG-WUR-156_GG-WUR-059_GG-WUR-116_GG-WUR-257_GG-WUR-113_GG-WUR-120_GG-WUR-117_GG-WUR-159_GG-WUR-258_GG-WUR-036_GG-WUR-162_GG-WUR-256_GG-WUR-239_GG-WUR-051_GG-WUR-092_GG-WUR-163_GG-WUR-069_GG-WUR-115_GG-WUR-130_GG-WUR-238_GG-WUR-236_GG-WUR-123_GG-WUR-055_GG-WUR-175_GG-WUR-050_GG-WUR-153_GG-WUR-118_GG-WUR-111_GG-WUR-134_G…	2422	62|2|0	missense_variant&splice_region_variant	MODERATE	MRPS31	ENSGALG00000017033	ENSGALT00000027520	3/7	-	553	517	173	R/C	Cgc/Tgc	-	deleterious(0.01)	1	PTHR13231&Pfam_domain:PF15433	mitochondrial small ribosomal subunit [GO:0005763]; structural constituent of ribosome [GO:0003735]mitochondrial small ribosomal subunit [GO:0005763]; nucleolus [GO:0005730]; poly(A) RNA binding [GO:0044822]; structural constituent of ribosome [GO:0003735]	-	YES
1	179294379	AAATACTCACAATACTCACT	AAACACTCACT	58214.5	196	392	392	1	392	0	WA_WD_W1	0:48,0:64,0:84	.:GG-WUR-108_GG-WUR-068_GG-WUR-154_GG-WUR-042_GG-WUR-156_GG-WUR-059_GG-WUR-116_GG-WUR-113_GG-WUR-120_GG-WUR-036_GG-WUR-162_GG-WUR-239_GG-WUR-051_GG-WUR-092_GG-WUR-069_GG-WUR-115_GG-WUR-130_GG-WUR-123_GG-WUR-055_GG-WUR-175_GG-WUR-050_GG-WUR-153_GG-WUR-118_GG-WUR-111_GG-WUR-134_GG-WUR-119_GG-WUR-122_GG-WUR-088_GG-WUR-147_GG-WUR-096_GG-WUR-136_GG-WUR-240_GG-WUR-160_GG-WUR-164_GG-WUR-039_GG-WUR-054_G…	164	49|16|0	splice_donor_variant&coding_sequence_variant&intron_variant	HIGH	PARP4	ENSGALG00000034473	ENSGALT00000059195	10/35	10/34	1354-?	1253-?	418-?	-	-	-	-	NA	-	NAD+ ADP-ribosyltransferase activity [GO:0003950]; protein ADP-ribosylation [GO:0006471]	no abnormal phenotype observed	NO
1	193022887	ATTTTTTC	ATTTTTTTC	111745	240	479	480	0.997917	478	1	WA_WD_W1	1:64,0:77,0:98	GG-WUR-042:GG-WUR-108_GG-WUR-068_GG-WUR-154_GG-WUR-114_GG-WUR-121_GG-WUR-156_GG-WUR-059_GG-WUR-261_GG-WUR-257_GG-WUR-113_GG-WUR-120_GG-WUR-117_GG-WUR-159_GG-WUR-258_GG-WUR-036_GG-WUR-162_GG-WUR-256_GG-WUR-239_GG-WUR-051_GG-WUR-092_GG-WUR-163_GG-WUR-069_GG-WUR-115_GG-WUR-130_GG-WUR-238_GG-WUR-236_GG-WUR-123_GG-WUR-055_GG-WUR-263_GG-WUR-175_GG-WUR-050_GG-WUR-153_GG-WUR-118_GG-WUR-259_GG-WUR-111_GG-…	712	54|19|0	splice_acceptor_variant&intron_variant	HIGH	RSF1	ENSGALG00000039068	ENSGALT00000057974	-	3/15	-	-	-	-	-	-	-	NA	-	RSF complex [GO:0031213]; zinc ion binding [GO:0008270]; regulation of transcription, DNA-templated [GO:0006355]	limbs/digits/tail,mortality/aging,growth/size/body,behavior	NO
1	195389170	GGGAA	GA	87797.3	239	478	478	1	478	0	WA_WD_W1	0:70,0:72,0:97	.:GG-WUR-108_GG-WUR-262_GG-WUR-068_GG-WUR-154_GG-WUR-042_GG-WUR-114_GG-WUR-121_GG-WUR-156_GG-WUR-059_GG-WUR-253_GG-WUR-116_GG-WUR-261_GG-WUR-257_GG-WUR-113_GG-WUR-120_GG-WUR-117_GG-WUR-159_GG-WUR-258_GG-WUR-036_GG-WUR-256_GG-WUR-239_GG-WUR-051_GG-WUR-092_GG-WUR-163_GG-WUR-069_GG-WUR-115_GG-WUR-130_GG-WUR-238_GG-WUR-236_GG-WUR-123_GG-WUR-055_GG-WUR-263_GG-WUR-175_GG-WUR-050_GG-WUR-153_GG-WUR-118_G…	736	43|11|0	inframe_deletion	MODERATE	P2RY2	ENSGALG00000042317	ENSGALT00000074479	1/1	-	321-324	321-324	107-108	GE/G	ggGGAA/ggA	-	-	-9.087	PROSITE_profiles:PS50262&PTHR24231&PTHR24231:SF17&Pfam_domain:PF00001&1.20.1070.10&Superfamily_domains:SSF81321	integral component of membrane [GO:0016021]; G-protein coupled purinergic nucleotide receptor activity [GO:0045028]; phospholipase C-activating G-protein coupled receptor signaling pathway [GO:0007200]; positive regulation of mucus secretion [GO:0070257]; regulation of vasodilation [GO:0042312]	muscle,nervous system,homeostasis,cellular,cardiovascular	NO
1	195786106	G	T	125934	246	492	492	1	492	0	WA_WD_W1	0:70,0:76,0:100	.:GG-WUR-108_GG-WUR-262_GG-WUR-068_GG-WUR-154_GG-WUR-042_GG-WUR-114_GG-WUR-121_GG-WUR-156_GG-WUR-059_GG-WUR-253_GG-WUR-116_GG-WUR-261_GG-WUR-257_GG-WUR-113_GG-WUR-120_GG-WUR-117_GG-WUR-159_GG-WUR-258_GG-WUR-036_GG-WUR-162_GG-WUR-256_GG-WUR-239_GG-WUR-051_GG-WUR-092_GG-WUR-163_GG-WUR-069_GG-WUR-115_GG-WUR-130_GG-WUR-238_GG-WUR-236_GG-WUR-123_GG-WUR-055_GG-WUR-263_GG-WUR-175_GG-WUR-050_GG-WUR-153_G…	1683	52|30|0	missense_variant	MODERATE	C2CD3	ENSGALG00000017314	ENSGALT00000027981	22/25	-	2017-07-20	2017-07-20	2017-11-07	R/G	Cga/Gga	-	deleterious(0)	-5.953	PTHR21254:SF1&PTHR21254	centriolar satellite [GO:0034451]; centriole [GO:0005814]; ciliary basal body [GO:0036064]; brain development [GO:0007420]; centriole elongation [GO:0061511]; embryonic digit morphogenesis [GO:0042733]; heart looping [GO:0001947]; neural plate axis specification [GO:0021997]; neural tube development [GO:0021915]; non-motile cilium assembly [GO:1905515]; protein localization to centrosome [GO:0071…	embryo,limbs/digits/tail,cellular,mortality/aging,nervous system,homeostasis,cardiovascular	YES
2	146248	GCATCG	GG	51321.1	179	358	358	1	358	0	WA_WD_W1	0:53,0:57,0:69	.:GG-WUR-108_GG-WUR-262_GG-WUR-068_GG-WUR-154_GG-WUR-042_GG-WUR-114_GG-WUR-121_GG-WUR-156_GG-WUR-059_GG-WUR-116_GG-WUR-261_GG-WUR-257_GG-WUR-113_GG-WUR-159_GG-WUR-258_GG-WUR-036_GG-WUR-162_GG-WUR-256_GG-WUR-239_GG-WUR-051_GG-WUR-092_GG-WUR-163_GG-WUR-069_GG-WUR-115_GG-WUR-130_GG-WUR-123_GG-WUR-055_GG-WUR-263_GG-WUR-175_GG-WUR-118_GG-WUR-111_GG-WUR-254_GG-WUR-119_GG-WUR-088_GG-WUR-147_GG-WUR-090_G…	797	11|1|10	frameshift_variant	HIGH	-	ENSGALG00000031804	ENSGALT00000081713	3/3	-	240-244	240-244	80-82	RIA/RX	cgCATCGcc/cgGcc	-	-	NA	PTHR23428&Pfam_domain:PF00125&1.10.20.10&SMART_domains:SM00427&Superfamily_domains:SSF47113&Prints_domain:PR00621	nucleosome [GO:0000786]; nucleus [GO:0005634]; DNA binding [GO:0003677]	-	NO
2	146255	CGGCG	TGGCAGTGG	48047.4	181	362	362	1	362	0	WA_WD_W1	0:54,0:58,0:69	.:GG-WUR-108_GG-WUR-262_GG-WUR-068_GG-WUR-154_GG-WUR-042_GG-WUR-114_GG-WUR-121_GG-WUR-156_GG-WUR-059_GG-WUR-116_GG-WUR-261_GG-WUR-257_GG-WUR-113_GG-WUR-159_GG-WUR-258_GG-WUR-036_GG-WUR-162_GG-WUR-256_GG-WUR-239_GG-WUR-051_GG-WUR-092_GG-WUR-163_GG-WUR-069_GG-WUR-115_GG-WUR-130_GG-WUR-123_GG-WUR-055_GG-WUR-263_GG-WUR-175_GG-WUR-118_GG-WUR-111_GG-WUR-254_GG-WUR-119_GG-WUR-122_GG-WUR-088_GG-WUR-147_G…	823	11|1|10	frameshift_variant	HIGH	-	ENSGALG00000031804	ENSGALT00000081713	3/3	-	246-250	246-250	82-84	AGE/AGSGX	gcCGGCGag/gcTGGCAGTGGag	-	-	NA	PTHR23428&Pfam_domain:PF00125&1.10.20.10&SMART_domains:SM00427&Superfamily_domains:SSF47113&Prints_domain:PR00621	nucleosome [GO:0000786]; nucleus [GO:0005634]; DNA binding [GO:0003677]	-	NO
2	146279	C	G	101109	243	486	486	1	486	0	WA_WD_W1	0:71,0:75,0:97	.:GG-WUR-108_GG-WUR-262_GG-WUR-068_GG-WUR-154_GG-WUR-042_GG-WUR-114_GG-WUR-121_GG-WUR-156_GG-WUR-059_GG-WUR-253_GG-WUR-116_GG-WUR-261_GG-WUR-257_GG-WUR-113_GG-WUR-120_GG-WUR-117_GG-WUR-159_GG-WUR-258_GG-WUR-036_GG-WUR-162_GG-WUR-256_GG-WUR-239_GG-WUR-051_GG-WUR-092_GG-WUR-163_GG-WUR-069_GG-WUR-115_GG-WUR-130_GG-WUR-238_GG-WUR-236_GG-WUR-123_GG-WUR-055_GG-WUR-263_GG-WUR-175_GG-WUR-050_GG-WUR-153_G…	1246	11|1|10	missense_variant	MODERATE	-	ENSGALG00000031804	ENSGALT00000081713	3/3	-	270	270	90	H/Q	caC/caG	-	tolerated_low_confidence(0.24)	-5.852	PTHR23428&Pfam_domain:PF00125&1.10.20.10&SMART_domains:SM00427&Superfamily_domains:SSF47113&Prints_domain:PR00621	nucleosome [GO:0000786]; nucleus [GO:0005634]; DNA binding [GO:0003677]	-	NO
2	146286	AAG	CAC	81509.4	234	468	468	1	468	0	WA_WD_W1	0:71,0:73,0:90	.:GG-WUR-108_GG-WUR-262_GG-WUR-068_GG-WUR-154_GG-WUR-042_GG-WUR-114_GG-WUR-121_GG-WUR-156_GG-WUR-059_GG-WUR-253_GG-WUR-116_GG-WUR-261_GG-WUR-257_GG-WUR-113_GG-WUR-120_GG-WUR-117_GG-WUR-159_GG-WUR-258_GG-WUR-036_GG-WUR-162_GG-WUR-256_GG-WUR-239_GG-WUR-051_GG-WUR-092_GG-WUR-163_GG-WUR-069_GG-WUR-115_GG-WUR-130_GG-WUR-238_GG-WUR-236_GG-WUR-123_GG-WUR-055_GG-WUR-263_GG-WUR-175_GG-WUR-050_GG-WUR-153_G…	1367	11|1|10	missense_variant	MODERATE	-	ENSGALG00000031804	ENSGALT00000081713	3/3	-	277-279	277-279	93	K/H	AAG/CAC	-	deleterious_low_confidence(0.02)	-5.088	PTHR23428&Pfam_domain:PF00125&1.10.20.10&SMART_domains:SM00427&Superfamily_domains:SSF47113&Prints_domain:PR00621	nucleosome [GO:0000786]; nucleus [GO:0005634]; DNA binding [GO:0003677]	-	NO
2	284378	T	C	148759	214	428	428	1	428	0	WA_WD_W1	0:51,0:75,0:88	.:GG-WUR-108_GG-WUR-068_GG-WUR-154_GG-WUR-042_GG-WUR-114_GG-WUR-121_GG-WUR-156_GG-WUR-059_GG-WUR-116_GG-WUR-113_GG-WUR-120_GG-WUR-117_GG-WUR-159_GG-WUR-162_GG-WUR-051_GG-WUR-163_GG-WUR-069_GG-WUR-115_GG-WUR-130_GG-WUR-123_GG-WUR-055_GG-WUR-175_GG-WUR-050_GG-WUR-153_GG-WUR-118_GG-WUR-111_GG-WUR-134_GG-WUR-119_GG-WUR-122_GG-WUR-088_GG-WUR-147_GG-WUR-090_GG-WUR-096_GG-WUR-136_GG-WUR-160_GG-WUR-135_G…	280	52|2|0	missense_variant	MODERATE	FASTK	ENSGALG00000033058	ENSGALT00000078474	10/10	-	1331	1331	444	L/P	cTg/cCg	-	deleterious_low_confidence(0.02)	1.68	-	protein kinase activity [GO:0004672]	immune,homeostasis,hematopoietic	YES
2	2152054	A	G	128563	247	494	494	1	494	0	WA_WD_W1	0:71,0:76,0:100	.:GG-WUR-108_GG-WUR-262_GG-WUR-068_GG-WUR-154_GG-WUR-042_GG-WUR-114_GG-WUR-121_GG-WUR-156_GG-WUR-059_GG-WUR-253_GG-WUR-116_GG-WUR-261_GG-WUR-257_GG-WUR-113_GG-WUR-120_GG-WUR-117_GG-WUR-159_GG-WUR-258_GG-WUR-036_GG-WUR-162_GG-WUR-256_GG-WUR-239_GG-WUR-051_GG-WUR-092_GG-WUR-163_GG-WUR-069_GG-WUR-115_GG-WUR-130_GG-WUR-238_GG-WUR-236_GG-WUR-123_GG-WUR-055_GG-WUR-263_GG-WUR-175_GG-WUR-050_GG-WUR-153_G…	3807	45|10|0	missense_variant	MODERATE	OBSCN	ENSGALG00000032534	ENSGALT00000064026	82/89	-	20024	20024	6675	I/T	aTt/aCt	-	deleterious(0.03)	-0.437	2.30.29.30&Pfam_domain:PF00169&PROSITE_profiles:PS50003&PTHR10489&PTHR10489:SF685&SMART_domains:SM00233&Superfamily_domains:SSF50729	ATP binding [GO:0005524]; protein kinase activity [GO:0004672]; Rho guanyl-nucleotide exchange factor activity [GO:0005089]; regulation of Rho protein signal transduction [GO:0035023]	muscle	YES
2	2198423	CAA	CA	98255.9	242	468	484	0.966942	452	16	WA_WD_W1	3:63,4:73,9:90	GG-WUR-262_GG-WUR-042_GG-WUR-236:GG-WUR-108_GG-WUR-068_GG-WUR-154_GG-WUR-114_GG-WUR-121_GG-WUR-156_GG-WUR-059_GG-WUR-253_GG-WUR-116_GG-WUR-261_GG-WUR-113_GG-WUR-120_GG-WUR-117_GG-WUR-159_GG-WUR-258_GG-WUR-036_GG-WUR-162_GG-WUR-256_GG-WUR-051_GG-WUR-092_GG-WUR-163_GG-WUR-069_GG-WUR-115_GG-WUR-130_GG-WUR-238_GG-WUR-123_GG-WUR-055_GG-WUR-263_GG-WUR-175_GG-WUR-050_GG-WUR-153_GG-WUR-118_GG-WUR-111_GG-…	243	45|10|0	frameshift_variant	HIGH	OBSCN	ENSGALG00000032534	ENSGALT00000067850	52/119	-	12156-12157	12156-12157	4052-4053	LW/LX	ctTTgg/ctTgg	-	-	NA	Low_complexity_(Seg):seg	ATP binding [GO:0005524]; protein kinase activity [GO:0004672]; Rho guanyl-nucleotide exchange factor activity [GO:0005089]; regulation of Rho protein signal transduction [GO:0035023]	muscle	NO
2	2205704	TTC	TTT	139124	245	490	490	1	490	0	WA_WD_W1	0:71,0:76,0:98	.:GG-WUR-108_GG-WUR-262_GG-WUR-068_GG-WUR-154_GG-WUR-042_GG-WUR-114_GG-WUR-121_GG-WUR-156_GG-WUR-059_GG-WUR-253_GG-WUR-116_GG-WUR-261_GG-WUR-257_GG-WUR-113_GG-WUR-120_GG-WUR-117_GG-WUR-159_GG-WUR-258_GG-WUR-036_GG-WUR-162_GG-WUR-256_GG-WUR-239_GG-WUR-051_GG-WUR-092_GG-WUR-163_GG-WUR-069_GG-WUR-115_GG-WUR-130_GG-WUR-238_GG-WUR-236_GG-WUR-123_GG-WUR-055_GG-WUR-263_GG-WUR-175_GG-WUR-050_GG-WUR-153_G…	2327	45|10|0	missense_variant	MODERATE	OBSCN	ENSGALG00000032534	ENSGALT00000064026	34/89	-	8853-8855	8853-8855	2951-2952	LK/LT	ctGAAg/ctAACg	-	-	-4.094	2.60.40.10&Pfam_domain:PF07679&PROSITE_profiles:PS50835&SMART_domains:SM00409&Superfamily_domains:SSF48726	ATP binding [GO:0005524]; protein kinase activity [GO:0004672]; Rho guanyl-nucleotide exchange factor activity [GO:0005089]; regulation of Rho protein signal transduction [GO:0035023]	muscle	NO
2	2206714	T	C	126985	248	496	496	1	496	0	WA_WD_W1	0:71,0:78,0:99	.:GG-WUR-108_GG-WUR-262_GG-WUR-068_GG-WUR-154_GG-WUR-042_GG-WUR-114_GG-WUR-121_GG-WUR-156_GG-WUR-059_GG-WUR-253_GG-WUR-116_GG-WUR-261_GG-WUR-257_GG-WUR-113_GG-WUR-120_GG-WUR-117_GG-WUR-159_GG-WUR-258_GG-WUR-036_GG-WUR-162_GG-WUR-256_GG-WUR-239_GG-WUR-051_GG-WUR-092_GG-WUR-163_GG-WUR-069_GG-WUR-115_GG-WUR-130_GG-WUR-238_GG-WUR-236_GG-WUR-123_GG-WUR-055_GG-WUR-263_GG-WUR-175_GG-WUR-050_GG-WUR-153_G…	2018	45|10|0	missense_variant	MODERATE	OBSCN	ENSGALG00000032534	ENSGALT00000064026	33/89	-	8594	8594	2865	N/S	aAt/aGt	-	tolerated(0.16)	-2.509	2.60.40.10&Pfam_domain:PF07679&PROSITE_profiles:PS50835&SMART_domains:SM00409&Superfamily_domains:SSF48726	ATP binding [GO:0005524]; protein kinase activity [GO:0004672]; Rho guanyl-nucleotide exchange factor activity [GO:0005089]; regulation of Rho protein signal transduction [GO:0035023]	muscle	YES
2	2261517	G	C	58634.1	235	470	470	1	470	0	WA_WD_W1	0:66,0:76,0:93	.:GG-WUR-108_GG-WUR-262_GG-WUR-068_GG-WUR-154_GG-WUR-042_GG-WUR-114_GG-WUR-121_GG-WUR-156_GG-WUR-059_GG-WUR-253_GG-WUR-116_GG-WUR-261_GG-WUR-257_GG-WUR-113_GG-WUR-120_GG-WUR-117_GG-WUR-159_GG-WUR-258_GG-WUR-036_GG-WUR-162_GG-WUR-051_GG-WUR-092_GG-WUR-163_GG-WUR-069_GG-WUR-115_GG-WUR-130_GG-WUR-238_GG-WUR-236_GG-WUR-123_GG-WUR-055_GG-WUR-263_GG-WUR-175_GG-WUR-050_GG-WUR-153_GG-WUR-118_GG-WUR-259_G…	744	45|10|0	missense_variant	MODERATE	OBSCN	ENSGALG00000032534	ENSGALT00000064026	9/89	-	3143	3143	1048	A/G	gCc/gGc	-	deleterious(0.03)	-3.593	2.60.40.10&PROSITE_profiles:PS50835&SMART_domains:SM00406&SMART_domains:SM00408&SMART_domains:SM00409&Superfamily_domains:SSF48726	ATP binding [GO:0005524]; protein kinase activity [GO:0004672]; Rho guanyl-nucleotide exchange factor activity [GO:0005089]; regulation of Rho protein signal transduction [GO:0035023]	muscle	YES
2	2267618	G	C	114363	248	488	496	0.983871	480	8	WA_WD_W1	0:71,0:76,8:93	.:GG-WUR-108_GG-WUR-262_GG-WUR-068_GG-WUR-154_GG-WUR-042_GG-WUR-114_GG-WUR-121_GG-WUR-156_GG-WUR-059_GG-WUR-253_GG-WUR-116_GG-WUR-261_GG-WUR-257_GG-WUR-113_GG-WUR-120_GG-WUR-117_GG-WUR-159_GG-WUR-258_GG-WUR-036_GG-WUR-162_GG-WUR-256_GG-WUR-239_GG-WUR-051_GG-WUR-092_GG-WUR-163_GG-WUR-069_GG-WUR-115_GG-WUR-130_GG-WUR-238_GG-WUR-236_GG-WUR-123_GG-WUR-055_GG-WUR-263_GG-WUR-175_GG-WUR-050_GG-WUR-153_G…	5144	45|10|0	missense_variant	MODERATE	OBSCN	ENSGALG00000032534	ENSGALT00000067850	13/119	-	3203	3203	1068	T/S	aCc/aGc	-	deleterious(0.03)	-3.419	2.60.40.10&Pfam_domain:PF13927&PROSITE_profiles:PS50835&SMART_domains:SM00406&SMART_domains:SM00408&SMART_domains:SM00409&Superfamily_domains:SSF48726	ATP binding [GO:0005524]; protein kinase activity [GO:0004672]; Rho guanyl-nucleotide exchange factor activity [GO:0005089]; regulation of Rho protein signal transduction [GO:0035023]	muscle	YES
2	3994662	GGCGGCCGCGGCCGCGGCCG	GGCGGCCGCGGCCG	46536	186	367	372	0.986559	364	3	WA_WD_W1	0:56,3:49,0:77	.:GG-WUR-108_GG-WUR-262_GG-WUR-068_GG-WUR-154_GG-WUR-042_GG-WUR-114_GG-WUR-156_GG-WUR-253_GG-WUR-116_GG-WUR-261_GG-WUR-257_GG-WUR-113_GG-WUR-120_GG-WUR-159_GG-WUR-258_GG-WUR-036_GG-WUR-239_GG-WUR-051_GG-WUR-092_GG-WUR-069_GG-WUR-115_GG-WUR-130_GG-WUR-238_GG-WUR-236_GG-WUR-123_GG-WUR-055_GG-WUR-263_GG-WUR-175_GG-WUR-050_GG-WUR-153_GG-WUR-118_GG-WUR-252_GG-WUR-111_GG-WUR-254_GG-WUR-134_GG-WUR-119_G…	462	65|0|0	inframe_deletion	MODERATE	KLHL18	ENSGALG00000005582	ENSGALT00000008971	1/10	-	136-154	13-31	2017-11-05	AAAAAAE/AAAAE	GCGGCCGCGGCCGCGGCCGag/GCGGCCGCGGCCGag	-	-	0.577	Low_complexity_(Seg):seg&PIRSF_domain:PIRSF037037	Cul3-RING ubiquitin ligase complex [GO:0031463]; protein ubiquitination [GO:0016567]	hearing/vestibular/ear,behavior	NO
2	4079444	GGA	AGC	117651	241	482	482	1	482	0	WA_WD_W1	0:67,0:78,0:96	.:GG-WUR-108_GG-WUR-068_GG-WUR-154_GG-WUR-042_GG-WUR-114_GG-WUR-121_GG-WUR-156_GG-WUR-059_GG-WUR-116_GG-WUR-257_GG-WUR-113_GG-WUR-120_GG-WUR-117_GG-WUR-159_GG-WUR-258_GG-WUR-036_GG-WUR-162_GG-WUR-256_GG-WUR-239_GG-WUR-051_GG-WUR-092_GG-WUR-163_GG-WUR-069_GG-WUR-115_GG-WUR-130_GG-WUR-238_GG-WUR-236_GG-WUR-123_GG-WUR-055_GG-WUR-263_GG-WUR-175_GG-WUR-050_GG-WUR-153_GG-WUR-118_GG-WUR-259_GG-WUR-252_G…	1441	52|11|2	missense_variant	MODERATE	MYO1G	ENSGALG00000005644	ENSGALT00000009051	10/22	-	1321-1323	1263-1265	421-422	QE/QA	caGGAg/caAGCg	-	-	-4.322	PROSITE_profiles:PS51456&PTHR13140:SF381&PTHR13140&Pfam_domain:PF00063&SMART_domains:SM00242&Superfamily_domains:SSF52540	extracellular exosome [GO:0070062]; filopodium [GO:0030175]; lamellipodium [GO:0030027]; leading edge membrane [GO:0031256]; microvillus [GO:0005902]; myosin complex [GO:0016459]; phagocytic cup [GO:0001891]; ATP binding [GO:0005524]; motor activity [GO:0003774]; phosphatidylinositol-3,4,5-trisphosphate binding [GO:0005547]; phosphatidylinositol-3,4-bisphosphate binding [GO:0043325]; phosphatidyl…	immune,hematopoietic	NO
2	4721320	AAGT	TAGT	113320	244	488	488	1	488	0	WA_WD_W1	0:68,0:78,0:98	.:GG-WUR-108_GG-WUR-262_GG-WUR-068_GG-WUR-154_GG-WUR-042_GG-WUR-114_GG-WUR-121_GG-WUR-156_GG-WUR-059_GG-WUR-253_GG-WUR-116_GG-WUR-257_GG-WUR-113_GG-WUR-120_GG-WUR-117_GG-WUR-159_GG-WUR-258_GG-WUR-036_GG-WUR-162_GG-WUR-239_GG-WUR-051_GG-WUR-092_GG-WUR-163_GG-WUR-069_GG-WUR-115_GG-WUR-130_GG-WUR-238_GG-WUR-236_GG-WUR-123_GG-WUR-055_GG-WUR-175_GG-WUR-050_GG-WUR-153_GG-WUR-118_GG-WUR-259_GG-WUR-252_G…	392	59|10|0	missense_variant	MODERATE	DLEC1	ENSGALG00000005826	ENSGALT00000009358	23/39	-	3065-3068	3065-3068	1022-1023	KV/IV	aAAGTg/aTAGTg	-	-	-3.82	PTHR23053&PTHR23053:SF12	cytoplasm [GO:0005737]; negative regulation of cell proliferation [GO:0008285]	reproductive,behavior	YES
2	5328618	T	A	113416	245	490	490	1	490	0	WA_WD_W1	0:68,0:78,0:99	.:GG-WUR-108_GG-WUR-262_GG-WUR-068_GG-WUR-154_GG-WUR-042_GG-WUR-114_GG-WUR-121_GG-WUR-156_GG-WUR-059_GG-WUR-253_GG-WUR-116_GG-WUR-261_GG-WUR-257_GG-WUR-113_GG-WUR-120_GG-WUR-117_GG-WUR-159_GG-WUR-258_GG-WUR-036_GG-WUR-162_GG-WUR-256_GG-WUR-239_GG-WUR-051_GG-WUR-092_GG-WUR-163_GG-WUR-069_GG-WUR-115_GG-WUR-130_GG-WUR-238_GG-WUR-123_GG-WUR-055_GG-WUR-263_GG-WUR-175_GG-WUR-050_GG-WUR-153_GG-WUR-118_G…	497	63|9|2	missense_variant	MODERATE	WDR48	ENSGALG00000006052	ENSGALT00000082651	3/19	-	232	232	78	N/Y	Aac/Tac	-	deleterious(0.02)	-1.994	2.130.10.10&PROSITE_profiles:PS50294&PTHR19862&PTHR19862:SF14&Superfamily_domains:SSF50978	late endosome [GO:0005770]; lysosome [GO:0005764]; nucleus [GO:0005634]; double-strand break repair via homologous recombination [GO:0000724]; embryonic organ development [GO:0048568]; homeostasis of number of cells [GO:0048872]; multicellular organism growth [GO:0035264]; positive regulation of epithelial cell proliferation [GO:0050679]; protein deubiquitination [GO:0016579]; regulation of prote…	embryo,skeleton,reproductive,growth/size/body,endocrine/exocrine,mortality/aging,integument	YES
2	5864311	C	G	123115	247	494	494	1	494	0	WA_WD_W1	0:70,0:78,0:99	.:GG-WUR-108_GG-WUR-262_GG-WUR-068_GG-WUR-154_GG-WUR-042_GG-WUR-114_GG-WUR-121_GG-WUR-156_GG-WUR-059_GG-WUR-253_GG-WUR-116_GG-WUR-261_GG-WUR-257_GG-WUR-113_GG-WUR-120_GG-WUR-117_GG-WUR-159_GG-WUR-258_GG-WUR-036_GG-WUR-162_GG-WUR-256_GG-WUR-239_GG-WUR-051_GG-WUR-092_GG-WUR-163_GG-WUR-069_GG-WUR-115_GG-WUR-130_GG-WUR-238_GG-WUR-236_GG-WUR-123_GG-WUR-055_GG-WUR-263_GG-WUR-175_GG-WUR-050_GG-WUR-153_G…	-43	0|0|0	splice_acceptor_variant&non_coding_transcript_variant	HIGH	-	ENSGALG00000041324	ENSGALT00000070749	-	2/3	-	-	-	-	-	-	-	NA	-		-	YES
2	14636021	ACAA	GCAA	115854	240	480	480	1	480	0	WA_WD_W1	0:64,0:77,0:99	.:GG-WUR-108_GG-WUR-262_GG-WUR-068_GG-WUR-154_GG-WUR-042_GG-WUR-114_GG-WUR-156_GG-WUR-059_GG-WUR-253_GG-WUR-116_GG-WUR-261_GG-WUR-113_GG-WUR-120_GG-WUR-117_GG-WUR-159_GG-WUR-036_GG-WUR-162_GG-WUR-239_GG-WUR-051_GG-WUR-092_GG-WUR-163_GG-WUR-069_GG-WUR-115_GG-WUR-130_GG-WUR-236_GG-WUR-123_GG-WUR-055_GG-WUR-263_GG-WUR-175_GG-WUR-050_GG-WUR-153_GG-WUR-118_GG-WUR-252_GG-WUR-111_GG-WUR-254_GG-WUR-134_G…	2327	59|2|0	missense_variant	MODERATE	ZNF438	ENSGALG00000007266	ENSGALT00000011768	6/6	-	2947-2950	2225-2228	742-743	HN/RN	cACAAt/cGCAAt	-	-	-3.157	-	metal ion binding [GO:0046872]; nucleic acid binding [GO:0003676]cytoplasm [GO:0005737]; nucleoplasm [GO:0005654]; metal ion binding [GO:0046872]; nucleic acid binding [GO:0003676]	-	YES
2	14913598	T	G	121824	246	448	492	0.910569	408	40	WA_WD_W1	0:69,18:58,22:77	.:GG-WUR-108_GG-WUR-262_GG-WUR-068_GG-WUR-154_GG-WUR-042_GG-WUR-114_GG-WUR-121_GG-WUR-156_GG-WUR-059_GG-WUR-253_GG-WUR-116_GG-WUR-261_GG-WUR-257_GG-WUR-113_GG-WUR-120_GG-WUR-117_GG-WUR-159_GG-WUR-258_GG-WUR-036_GG-WUR-162_GG-WUR-256_GG-WUR-239_GG-WUR-051_GG-WUR-092_GG-WUR-163_GG-WUR-069_GG-WUR-115_GG-WUR-130_GG-WUR-238_GG-WUR-236_GG-WUR-123_GG-WUR-055_GG-WUR-263_GG-WUR-175_GG-WUR-050_GG-WUR-153_G…	3366	52|8|0	missense_variant	MODERATE	KIAA1462	ENSGALG00000007346	ENSGALT00000011883	3/4	-	1553	1384	462	K/Q	Aaa/Caa	-	tolerated(0.07)	-2.983	Pfam_domain:PF15351&PTHR34757&PTHR34757:SF1	cell-cell junction [GO:0005911]	-	YES
2	16149688	A	G	145054	241	482	482	1	482	0	WA_WD_W1	0:68,0:78,0:95	.:GG-WUR-108_GG-WUR-262_GG-WUR-068_GG-WUR-154_GG-WUR-042_GG-WUR-114_GG-WUR-121_GG-WUR-156_GG-WUR-059_GG-WUR-253_GG-WUR-116_GG-WUR-261_GG-WUR-257_GG-WUR-113_GG-WUR-120_GG-WUR-117_GG-WUR-159_GG-WUR-258_GG-WUR-036_GG-WUR-162_GG-WUR-256_GG-WUR-239_GG-WUR-092_GG-WUR-163_GG-WUR-069_GG-WUR-115_GG-WUR-130_GG-WUR-238_GG-WUR-236_GG-WUR-123_GG-WUR-055_GG-WUR-263_GG-WUR-175_GG-WUR-050_GG-WUR-153_GG-WUR-259_G…	200	55|19|0	missense_variant	MODERATE	APBB1IP	ENSGALG00000007579	ENSGALT00000061113	13/13	-	1516	1516	506	Y/H	Tat/Cat	-	deleterious_low_confidence(0.05)	0.678	-	cytosol [GO:0005829]; T cell receptor complex [GO:0042101]; positive regulation of cell adhesion [GO:0045785]; signal transduction [GO:0007165]; T cell activation via T cell receptor contact with antigen bound to MHC molecule on antigen presenting cell [GO:0002291]signal transduction [GO:0007165]	no abnormal phenotype observed	YES
2	22511962	G	C	120319	247	494	494	1	494	0	WA_WD_W1	0:69,0:78,0:100	.:GG-WUR-108_GG-WUR-068_GG-WUR-154_GG-WUR-042_GG-WUR-114_GG-WUR-121_GG-WUR-156_GG-WUR-059_GG-WUR-253_GG-WUR-116_GG-WUR-261_GG-WUR-257_GG-WUR-113_GG-WUR-120_GG-WUR-117_GG-WUR-159_GG-WUR-258_GG-WUR-036_GG-WUR-162_GG-WUR-256_GG-WUR-239_GG-WUR-051_GG-WUR-092_GG-WUR-163_GG-WUR-069_GG-WUR-115_GG-WUR-130_GG-WUR-238_GG-WUR-236_GG-WUR-123_GG-WUR-055_GG-WUR-263_GG-WUR-175_GG-WUR-050_GG-WUR-153_GG-WUR-118_G…	3962	52|20|0	missense_variant	MODERATE	AKAP9	ENSGALG00000040724	ENSGALT00000071149	41/50	-	9906	9903	3301	Q/H	caG/caC	-	deleterious(0.05)	-4.227	Low_complexity_(Seg):seg&PTHR18937&PTHR18937:SF252&Coiled-coils_(Ncoils):Coil	DNA binding [GO:0003677]; signal transduction [GO:0007165]	skeleton,reproductive,craniofacial,adipose,endocrine/exocrine,immune,homeostasis,mortality/aging,growth/size/body,hematopoietic	YES
2	24945757	C	G	101822	232	464	464	1	464	0	WA_WD_W1	0:60,0:78,0:94	.:GG-WUR-108_GG-WUR-262_GG-WUR-068_GG-WUR-154_GG-WUR-042_GG-WUR-114_GG-WUR-121_GG-WUR-156_GG-WUR-059_GG-WUR-253_GG-WUR-116_GG-WUR-261_GG-WUR-257_GG-WUR-113_GG-WUR-120_GG-WUR-117_GG-WUR-159_GG-WUR-036_GG-WUR-162_GG-WUR-051_GG-WUR-092_GG-WUR-163_GG-WUR-069_GG-WUR-115_GG-WUR-130_GG-WUR-238_GG-WUR-236_GG-WUR-123_GG-WUR-055_GG-WUR-175_GG-WUR-050_GG-WUR-153_GG-WUR-118_GG-WUR-111_GG-WUR-134_GG-WUR-119_G…	468	55|16|0	start_lost	HIGH	GLCCI1	ENSGALG00000035239	ENSGALT00000073201	1/6	-	3	3	1	S/R	agC/agG	-	deleterious_low_confidence(0)	NA	-	-	-	YES
2	30965001	TCTAA	TCCAG	140702	235	470	470	1	470	0	WA_WD_W1	0:64,0:75,0:96	.:GG-WUR-108_GG-WUR-068_GG-WUR-154_GG-WUR-042_GG-WUR-114_GG-WUR-121_GG-WUR-156_GG-WUR-059_GG-WUR-116_GG-WUR-261_GG-WUR-113_GG-WUR-120_GG-WUR-117_GG-WUR-159_GG-WUR-258_GG-WUR-036_GG-WUR-162_GG-WUR-239_GG-WUR-051_GG-WUR-092_GG-WUR-163_GG-WUR-069_GG-WUR-115_GG-WUR-130_GG-WUR-238_GG-WUR-236_GG-WUR-123_GG-WUR-055_GG-WUR-263_GG-WUR-175_GG-WUR-050_GG-WUR-153_GG-WUR-118_GG-WUR-259_GG-WUR-252_GG-WUR-111_G…	369	0|0|0	splice_acceptor_variant&intron_variant&non_coding_transcript_variant	HIGH	-	ENSGALG00000021835	ENSGALT00000056555	-	2/7	-	-	-	-	-	-	-	NA	-		-	NO
2	30971281	A	G	95609.2	237	453	474	0.955696	432	21	WA_WD_W1	0:65,21:56,0:95	.:GG-WUR-108_GG-WUR-262_GG-WUR-068_GG-WUR-154_GG-WUR-042_GG-WUR-114_GG-WUR-121_GG-WUR-156_GG-WUR-059_GG-WUR-116_GG-WUR-257_GG-WUR-113_GG-WUR-120_GG-WUR-117_GG-WUR-159_GG-WUR-258_GG-WUR-036_GG-WUR-162_GG-WUR-256_GG-WUR-239_GG-WUR-051_GG-WUR-092_GG-WUR-163_GG-WUR-069_GG-WUR-115_GG-WUR-130_GG-WUR-238_GG-WUR-236_GG-WUR-123_GG-WUR-055_GG-WUR-175_GG-WUR-050_GG-WUR-153_GG-WUR-118_GG-WUR-259_GG-WUR-111_G…	696	0|0|0	splice_donor_variant&non_coding_transcript_variant	HIGH	-	ENSGALG00000021835	ENSGALT00000035378	-	7/7	-	-	-	-	-	-	-	NA	-		-	YES
2	31828439	A	G	115283	242	474	484	0.979339	464	10	WA_WD_W1	0:69,10:67,0:96	.:GG-WUR-108_GG-WUR-262_GG-WUR-068_GG-WUR-154_GG-WUR-042_GG-WUR-114_GG-WUR-121_GG-WUR-156_GG-WUR-059_GG-WUR-253_GG-WUR-116_GG-WUR-261_GG-WUR-257_GG-WUR-113_GG-WUR-120_GG-WUR-117_GG-WUR-159_GG-WUR-258_GG-WUR-162_GG-WUR-256_GG-WUR-239_GG-WUR-051_GG-WUR-092_GG-WUR-163_GG-WUR-069_GG-WUR-115_GG-WUR-130_GG-WUR-238_GG-WUR-236_GG-WUR-123_GG-WUR-055_GG-WUR-263_GG-WUR-175_GG-WUR-050_GG-WUR-153_GG-WUR-118_G…	-48	49|4|0	splice_donor_variant	HIGH	C7orf31	ENSGALG00000011021	ENSGALT00000017956	-	8/12	-	-	-	-	-	-	-	NA	-	centrosome [GO:0005813]	-	YES
2	34334180	C	A	96005.1	236	472	472	1	472	0	WA_WD_W1	0:67,0:76,0:93	.:GG-WUR-108_GG-WUR-262_GG-WUR-068_GG-WUR-154_GG-WUR-042_GG-WUR-114_GG-WUR-121_GG-WUR-156_GG-WUR-059_GG-WUR-253_GG-WUR-116_GG-WUR-261_GG-WUR-257_GG-WUR-113_GG-WUR-120_GG-WUR-117_GG-WUR-159_GG-WUR-036_GG-WUR-162_GG-WUR-256_GG-WUR-239_GG-WUR-051_GG-WUR-092_GG-WUR-163_GG-WUR-069_GG-WUR-115_GG-WUR-130_GG-WUR-238_GG-WUR-123_GG-WUR-055_GG-WUR-175_GG-WUR-050_GG-WUR-153_GG-WUR-118_GG-WUR-252_GG-WUR-111_G…	591	49|6|8	missense_variant	MODERATE	GALNT15	ENSGALG00000011235	ENSGALT00000018324	3/11	-	670	670	224	L/I	Ctt/Att	-	deleterious(0.01)	-1.555	PTHR11675&PTHR11675:SF36&Pfam_domain:PF00535&3.90.550.10&Superfamily_domains:SSF53448	Golgi membrane [GO:0000139]; integral component of membrane [GO:0016021]; transport vesicle [GO:0030133]; carbohydrate binding [GO:0030246]; transferase activity, transferring glycosyl groups [GO:0016757]; protein glycosylation [GO:0006486]Golgi membrane [GO:0000139]; integral component of membrane [GO:0016021]; carbohydrate binding [GO:0030246]; transferase activity, transferring glycosyl groups…	reproductive,homeostasis,hematopoietic,behavior	YES
2	35249934	TCAG	CCAG	106219	249	489	498	0.981928	480	9	WA_WD_W1	0:71,0:78,9:91	.:GG-WUR-108_GG-WUR-262_GG-WUR-068_GG-WUR-154_GG-WUR-042_GG-WUR-114_GG-WUR-121_GG-WUR-156_GG-WUR-059_GG-WUR-253_GG-WUR-116_GG-WUR-261_GG-WUR-257_GG-WUR-113_GG-WUR-120_GG-WUR-117_GG-WUR-159_GG-WUR-258_GG-WUR-036_GG-WUR-162_GG-WUR-256_GG-WUR-239_GG-WUR-051_GG-WUR-092_GG-WUR-163_GG-WUR-069_GG-WUR-115_GG-WUR-130_GG-WUR-238_GG-WUR-236_GG-WUR-123_GG-WUR-055_GG-WUR-263_GG-WUR-175_GG-WUR-050_GG-WUR-153_G…	536	63|1|0	stop_lost	HIGH	SATB1	ENSGALG00000011254	ENSGALT00000042895	10/10	-	2008-2011	1983-1986	661-662	D*/DW	gaCTGA/gaCTGG	-	-	NA	-	nuclear heterochromatin [GO:0005720]; nuclear matrix [GO:0016363]; PML body [GO:0016605]; chromatin binding [GO:0003682]; RNA polymerase II regulatory region sequence-specific DNA binding [GO:0000977]; transcriptional repressor activity, RNA polymerase II transcription regulatory region sequence-specific binding [GO:0001227]; activated T cell proliferation [GO:0050798]; CD4-positive, alpha-beta T…	skeleton,growth/size/body,endocrine/exocrine,immune,vision/eye,behavior,mortality/aging,nervous system,hematopoietic	YES
2	42428966	TCA	TA	107423	245	490	490	1	490	0	WA_WD_W1	0:68,0:78,0:99	.:GG-WUR-108_GG-WUR-262_GG-WUR-068_GG-WUR-154_GG-WUR-042_GG-WUR-114_GG-WUR-121_GG-WUR-156_GG-WUR-059_GG-WUR-253_GG-WUR-116_GG-WUR-113_GG-WUR-120_GG-WUR-117_GG-WUR-159_GG-WUR-258_GG-WUR-036_GG-WUR-162_GG-WUR-256_GG-WUR-239_GG-WUR-051_GG-WUR-092_GG-WUR-163_GG-WUR-069_GG-WUR-115_GG-WUR-130_GG-WUR-238_GG-WUR-236_GG-WUR-123_GG-WUR-055_GG-WUR-263_GG-WUR-175_GG-WUR-050_GG-WUR-153_GG-WUR-118_GG-WUR-259_G…	735	63|10|0	splice_acceptor_variant&intron_variant	HIGH	DNAJC13	ENSGALG00000035068	ENSGALT00000047116	-	28/55	-	-	-	-	-	-	-	NA	-	-	-	YES
2	46133385	G	A	113612	243	486	486	1	486	0	WA_WD_W1	0:67,0:78,0:98	.:GG-WUR-108_GG-WUR-262_GG-WUR-068_GG-WUR-154_GG-WUR-042_GG-WUR-114_GG-WUR-121_GG-WUR-156_GG-WUR-059_GG-WUR-253_GG-WUR-116_GG-WUR-261_GG-WUR-257_GG-WUR-113_GG-WUR-120_GG-WUR-117_GG-WUR-159_GG-WUR-036_GG-WUR-162_GG-WUR-256_GG-WUR-239_GG-WUR-051_GG-WUR-092_GG-WUR-163_GG-WUR-069_GG-WUR-115_GG-WUR-130_GG-WUR-238_GG-WUR-236_GG-WUR-123_GG-WUR-055_GG-WUR-263_GG-WUR-175_GG-WUR-050_GG-WUR-153_GG-WUR-118_G…	10410	48|2|0	missense_variant	MODERATE	TRANK1	ENSGALG00000037629	ENSGALT00000054541	12/21	-	2507	2507	836	T/M	aCg/aTg	-	deleterious(0.03)	-0.792	PTHR21529&PTHR21529:SF4	ATP binding [GO:0005524]	-	YES
2	46137194	TAATTTTTTC	TAATTTTTTTC	91539.1	238	476	476	1	476	0	WA_WD_W1	0:64,0:76,0:98	.:GG-WUR-108_GG-WUR-262_GG-WUR-068_GG-WUR-154_GG-WUR-042_GG-WUR-114_GG-WUR-121_GG-WUR-156_GG-WUR-059_GG-WUR-253_GG-WUR-116_GG-WUR-257_GG-WUR-113_GG-WUR-120_GG-WUR-159_GG-WUR-258_GG-WUR-036_GG-WUR-162_GG-WUR-256_GG-WUR-239_GG-WUR-051_GG-WUR-092_GG-WUR-163_GG-WUR-069_GG-WUR-115_GG-WUR-130_GG-WUR-238_GG-WUR-123_GG-WUR-055_GG-WUR-175_GG-WUR-050_GG-WUR-153_GG-WUR-118_GG-WUR-259_GG-WUR-111_GG-WUR-134_G…	1021	48|2|0	splice_donor_variant&intron_variant	HIGH	TRANK1	ENSGALG00000037629	ENSGALT00000054541	-	10/20	-	-	-	-	-	-	-	NA	-	ATP binding [GO:0005524]	-	NO
2	46150793	GAAAAAAAAAC	GAAAAAAAAAAG	60248.2	235	462	470	0.982979	454	8	WA_WD_W1	2:63,2:73,4:91	GG-WUR-122_GG-WUR-147:GG-WUR-108_GG-WUR-068_GG-WUR-154_GG-WUR-042_GG-WUR-114_GG-WUR-121_GG-WUR-156_GG-WUR-059_GG-WUR-116_GG-WUR-261_GG-WUR-257_GG-WUR-113_GG-WUR-120_GG-WUR-159_GG-WUR-258_GG-WUR-036_GG-WUR-162_GG-WUR-256_GG-WUR-239_GG-WUR-051_GG-WUR-092_GG-WUR-163_GG-WUR-069_GG-WUR-130_GG-WUR-238_GG-WUR-236_GG-WUR-123_GG-WUR-055_GG-WUR-263_GG-WUR-175_GG-WUR-050_GG-WUR-118_GG-WUR-252_GG-WUR-111_GG-…	913	48|2|0	frameshift_variant	HIGH	TRANK1	ENSGALG00000037629	ENSGALT00000054541	1/21	-	77-86	77-86	26-29	GFFF/AFFFX	gGTTTTTTTTTc/gCTTTTTTTTTTc	-	-	0.195	-	ATP binding [GO:0005524]	-	NO
2	46966855	G	C	106630	241	482	482	1	482	0	WA_WD_W1	0:65,0:76,0:100	.:GG-WUR-108_GG-WUR-262_GG-WUR-068_GG-WUR-154_GG-WUR-042_GG-WUR-114_GG-WUR-121_GG-WUR-156_GG-WUR-059_GG-WUR-116_GG-WUR-261_GG-WUR-113_GG-WUR-120_GG-WUR-117_GG-WUR-159_GG-WUR-258_GG-WUR-036_GG-WUR-239_GG-WUR-051_GG-WUR-092_GG-WUR-163_GG-WUR-069_GG-WUR-115_GG-WUR-130_GG-WUR-238_GG-WUR-236_GG-WUR-123_GG-WUR-055_GG-WUR-263_GG-WUR-175_GG-WUR-050_GG-WUR-153_GG-WUR-118_GG-WUR-259_GG-WUR-111_GG-WUR-254_G…	1858	60|5|0	missense_variant	MODERATE	EEPD1	ENSGALG00000039983	ENSGALT00000055028	6/7	-	1327	1327	443	P/A	Cct/Gct	-	tolerated(0.07)	-4.152	PTHR21180&PTHR21180:SF32&Pfam_domain:PF03372&3.60.10.10&Superfamily_domains:SSF56219	DNA binding [GO:0003677]; DNA repair [GO:0006281]	-	YES
2	55307738	A	T	90319.2	232	418	464	0.900862	384	34	WA_WD_W1	32:27,2:73,0:92	GG-WUR-262_GG-WUR-042_GG-WUR-121_GG-WUR-156_GG-WUR-059_GG-WUR-159_GG-WUR-258_GG-WUR-162_GG-WUR-239_GG-WUR-051_GG-WUR-115_GG-WUR-130_GG-WUR-236_GG-WUR-263_GG-WUR-153_GG-WUR-259_GG-WUR-111_GG-WUR-134_GG-WUR-088_GG-WUR-090_GG-WUR-096_GG-WUR-240_GG-WUR-160_GG-WUR-135_GG-WUR-164_GG-WUR-129_GG-WUR-097_GG-WUR-053_GG-WUR-155_GG-WUR-056_GG-WUR-052_GG-WUR-143:GG-WUR-108_GG-WUR-068_GG-WUR-154_GG-WUR-253_GG-…	2237	50|27|0	missense_variant	MODERATE	-	ENSGALG00000039139	ENSGALT00000049546	16/17	-	1536	1263	421	D/E	gaT/gaA	-	tolerated(0.47)	-3.022	1d5rA02&Pfam_domain:PF10409&PROSITE_profiles:PS51182&PTHR12305&PTHR12305:SF40&SMART_domains:SM01326&Superfamily_domains:SSF49562	intracellular [GO:0005622]; metal ion binding [GO:0046872]; intracellular signal transduction [GO:0035556]	-	YES
2	60239045	C	G	72165.4	223	420	446	0.941704	404	16	WA_WD_W1	0:62,16:51,0:89	.:GG-WUR-108_GG-WUR-262_GG-WUR-068_GG-WUR-154_GG-WUR-042_GG-WUR-121_GG-WUR-156_GG-WUR-059_GG-WUR-253_GG-WUR-116_GG-WUR-261_GG-WUR-113_GG-WUR-120_GG-WUR-117_GG-WUR-159_GG-WUR-258_GG-WUR-036_GG-WUR-162_GG-WUR-256_GG-WUR-239_GG-WUR-051_GG-WUR-092_GG-WUR-115_GG-WUR-130_GG-WUR-238_GG-WUR-236_GG-WUR-123_GG-WUR-055_GG-WUR-175_GG-WUR-050_GG-WUR-153_GG-WUR-118_GG-WUR-259_GG-WUR-111_GG-WUR-254_GG-WUR-134_G…	-48	0|0|0	splice_acceptor_variant&non_coding_transcript_variant	HIGH	-	ENSGALG00000041067	ENSGALT00000048393	-	2/2	-	-	-	-	-	-	-	NA	-		-	YES
2	60721684	CA	CG	119153	243	486	486	1	486	0	WA_WD_W1	0:69,0:77,0:97	.:GG-WUR-108_GG-WUR-262_GG-WUR-068_GG-WUR-154_GG-WUR-042_GG-WUR-114_GG-WUR-121_GG-WUR-156_GG-WUR-059_GG-WUR-253_GG-WUR-116_GG-WUR-261_GG-WUR-257_GG-WUR-113_GG-WUR-120_GG-WUR-117_GG-WUR-159_GG-WUR-258_GG-WUR-036_GG-WUR-162_GG-WUR-256_GG-WUR-239_GG-WUR-051_GG-WUR-092_GG-WUR-163_GG-WUR-069_GG-WUR-115_GG-WUR-130_GG-WUR-238_GG-WUR-236_GG-WUR-123_GG-WUR-055_GG-WUR-263_GG-WUR-175_GG-WUR-050_GG-WUR-153_G…	1881	54|0|0	missense_variant	MODERATE	NOL7	ENSGALG00000012695	ENSGALT00000031072	6/8	-	547-548	503-504	168	P/L	cCA/cTG	-	deleterious(0)	-8.309	Pfam_domain:PF08157&PTHR32337	nucleus [GO:0005634]nucleus [GO:0005634]	-	NO
2	60791229	C	T	115008	244	487	488	0.997951	486	1	WA_WD_W1	0:67,1:77,0:99	.:GG-WUR-108_GG-WUR-262_GG-WUR-068_GG-WUR-154_GG-WUR-042_GG-WUR-114_GG-WUR-121_GG-WUR-156_GG-WUR-059_GG-WUR-253_GG-WUR-116_GG-WUR-257_GG-WUR-113_GG-WUR-120_GG-WUR-117_GG-WUR-159_GG-WUR-036_GG-WUR-162_GG-WUR-256_GG-WUR-239_GG-WUR-051_GG-WUR-092_GG-WUR-163_GG-WUR-069_GG-WUR-115_GG-WUR-130_GG-WUR-238_GG-WUR-236_GG-WUR-123_GG-WUR-055_GG-WUR-263_GG-WUR-175_GG-WUR-050_GG-WUR-153_GG-WUR-118_GG-WUR-259_G…	-32	0|0|0	splice_acceptor_variant&non_coding_transcript_variant	HIGH	-	ENSGALG00000039900	ENSGALT00000047462	-	1/2	-	-	-	-	-	-	-	NA	-		-	YES
2	62242248	TG	CG	105816	238	476	476	1	476	0	WA_WD_W1	0:65,0:74,0:99	.:GG-WUR-108_GG-WUR-262_GG-WUR-068_GG-WUR-154_GG-WUR-042_GG-WUR-114_GG-WUR-121_GG-WUR-156_GG-WUR-059_GG-WUR-253_GG-WUR-116_GG-WUR-261_GG-WUR-257_GG-WUR-113_GG-WUR-120_GG-WUR-117_GG-WUR-159_GG-WUR-258_GG-WUR-036_GG-WUR-239_GG-WUR-051_GG-WUR-092_GG-WUR-163_GG-WUR-069_GG-WUR-115_GG-WUR-130_GG-WUR-238_GG-WUR-123_GG-WUR-055_GG-WUR-175_GG-WUR-050_GG-WUR-153_GG-WUR-118_GG-WUR-259_GG-WUR-252_GG-WUR-111_G…	1529	64|9|0	missense_variant	MODERATE	NUP153	ENSGALG00000012720	ENSGALT00000020766	11/13	-	2754-2755	2754-2755	918-919	SS/SG	tcCAgc/tcCGgc	-	-	-2.659	PTHR23193&PTHR23193:SF26	zinc ion binding [GO:0008270]	-	YES
2	62251965	GGTTTG	GGTTTA	86497.8	218	436	436	1	436	0	WA_WD_W1	0:55,0:72,0:91	.:GG-WUR-108_GG-WUR-068_GG-WUR-154_GG-WUR-042_GG-WUR-114_GG-WUR-121_GG-WUR-156_GG-WUR-059_GG-WUR-116_GG-WUR-257_GG-WUR-113_GG-WUR-120_GG-WUR-159_GG-WUR-162_GG-WUR-239_GG-WUR-051_GG-WUR-092_GG-WUR-069_GG-WUR-115_GG-WUR-130_GG-WUR-238_GG-WUR-236_GG-WUR-123_GG-WUR-055_GG-WUR-263_GG-WUR-175_GG-WUR-050_GG-WUR-153_GG-WUR-118_GG-WUR-259_GG-WUR-111_GG-WUR-134_GG-WUR-119_GG-WUR-122_GG-WUR-088_GG-WUR-147_G…	553	64|9|0	stop_gained	HIGH	NUP153	ENSGALG00000012720	ENSGALT00000020766	4/13	-	307-312	307-312	103-104	QT/*T	CAAACC/TAAACC	-	-	NA	Pfam_domain:PF08604&PTHR23193&PTHR23193:SF26	zinc ion binding [GO:0008270]	-	NO
2	68192864	GAAAAAAAAAT	GAAAAAAAAT	64634.8	190	379	380	0.997368	378	1	WA_WD_W1	1:43,0:64,0:82	GG-WUR-135:GG-WUR-108_GG-WUR-068_GG-WUR-154_GG-WUR-042_GG-WUR-114_GG-WUR-121_GG-WUR-156_GG-WUR-059_GG-WUR-116_GG-WUR-113_GG-WUR-120_GG-WUR-159_GG-WUR-036_GG-WUR-051_GG-WUR-092_GG-WUR-163_GG-WUR-115_GG-WUR-130_GG-WUR-236_GG-WUR-123_GG-WUR-055_GG-WUR-175_GG-WUR-050_GG-WUR-153_GG-WUR-111_GG-WUR-134_GG-WUR-119_GG-WUR-122_GG-WUR-088_GG-WUR-096_GG-WUR-136_GG-WUR-160_GG-WUR-164_GG-WUR-039_GG-WUR-054_GG-…	2683	0|0|0	splice_donor_variant&non_coding_transcript_exon_variant&non_coding_transcript_variant	HIGH	-	ENSGALG00000034913	ENSGALT00000050394	1/2	-	914-923	-	-	-	-	-	-	NA	-		-	NO
2	78498863	G	A	87903.1	227	454	454	1	454	0	WA_WD_W1	0:59,0:77,0:91	.:GG-WUR-108_GG-WUR-068_GG-WUR-154_GG-WUR-042_GG-WUR-114_GG-WUR-121_GG-WUR-156_GG-WUR-059_GG-WUR-253_GG-WUR-116_GG-WUR-257_GG-WUR-113_GG-WUR-120_GG-WUR-117_GG-WUR-159_GG-WUR-036_GG-WUR-162_GG-WUR-051_GG-WUR-092_GG-WUR-163_GG-WUR-069_GG-WUR-115_GG-WUR-130_GG-WUR-238_GG-WUR-236_GG-WUR-123_GG-WUR-055_GG-WUR-175_GG-WUR-050_GG-WUR-153_GG-WUR-118_GG-WUR-111_GG-WUR-134_GG-WUR-119_GG-WUR-122_GG-WUR-088_G…	1826	57|4|0	missense_variant	MODERATE	ROPN1L	ENSGALG00000013006	ENSGALT00000021239	6/6	-	768	652	218	L/F	Ctt/Ttt	-	deleterious(0)	-1.425	PTHR14952&PTHR14952:SF14&Coiled-coils_(Ncoils):Coil	cytoplasm [GO:0005737]; motile cilium [GO:0031514]	respiratory,skeleton,cellular	YES
2	89131711	CA	CG	99251.6	239	477	478	0.997908	476	1	WA_WD_W1	1:66,0:76,0:96	GG-WUR-263:GG-WUR-108_GG-WUR-262_GG-WUR-154_GG-WUR-042_GG-WUR-114_GG-WUR-121_GG-WUR-156_GG-WUR-059_GG-WUR-253_GG-WUR-116_GG-WUR-261_GG-WUR-257_GG-WUR-113_GG-WUR-120_GG-WUR-117_GG-WUR-159_GG-WUR-258_GG-WUR-036_GG-WUR-162_GG-WUR-256_GG-WUR-239_GG-WUR-051_GG-WUR-092_GG-WUR-163_GG-WUR-069_GG-WUR-115_GG-WUR-130_GG-WUR-238_GG-WUR-236_GG-WUR-123_GG-WUR-055_GG-WUR-175_GG-WUR-050_GG-WUR-153_GG-WUR-118_GG-…	263	14|4|0	missense_variant	MODERATE	-	ENSGALG00000013268	ENSGALT00000021845	56/76	-	9336-9337	9312-9313	3104-3105	HV/HM	caTGtg/caCAtg	-	-	-2.61	PTHR10676:SF240&PTHR10676&3.40.50.300&Pfam_domain:PF12780&Superfamily_domains:SSF52540	dynein complex [GO:0030286]; ATP binding [GO:0005524]; ATPase activity [GO:0016887]; microtubule motor activity [GO:0003777]; microtubule-based movement [GO:0007018]	-	NO
2	89134075	T	C	102024	240	480	480	1	480	0	WA_WD_W1	0:67,0:76,0:97	.:GG-WUR-108_GG-WUR-262_GG-WUR-068_GG-WUR-154_GG-WUR-042_GG-WUR-114_GG-WUR-121_GG-WUR-156_GG-WUR-059_GG-WUR-253_GG-WUR-116_GG-WUR-261_GG-WUR-257_GG-WUR-113_GG-WUR-120_GG-WUR-117_GG-WUR-159_GG-WUR-258_GG-WUR-036_GG-WUR-256_GG-WUR-239_GG-WUR-051_GG-WUR-092_GG-WUR-163_GG-WUR-069_GG-WUR-115_GG-WUR-130_GG-WUR-238_GG-WUR-123_GG-WUR-055_GG-WUR-263_GG-WUR-175_GG-WUR-050_GG-WUR-153_GG-WUR-118_GG-WUR-259_G…	263	14|4|0	missense_variant	MODERATE	-	ENSGALG00000013268	ENSGALT00000021845	55/76	-	8926	8902	2968	T/A	Act/Gct	-	deleterious(0.02)	-4.732	PTHR10676:SF240&PTHR10676&3.40.50.300&Pfam_domain:PF12780&Superfamily_domains:SSF52540	dynein complex [GO:0030286]; ATP binding [GO:0005524]; ATPase activity [GO:0016887]; microtubule motor activity [GO:0003777]; microtubule-based movement [GO:0007018]	-	YES
2	89180736	GA	GC	110820	243	486	486	1	486	0	WA_WD_W1	0:68,0:77,0:98	.:GG-WUR-108_GG-WUR-262_GG-WUR-068_GG-WUR-154_GG-WUR-042_GG-WUR-114_GG-WUR-121_GG-WUR-156_GG-WUR-059_GG-WUR-253_GG-WUR-116_GG-WUR-261_GG-WUR-257_GG-WUR-113_GG-WUR-120_GG-WUR-117_GG-WUR-159_GG-WUR-258_GG-WUR-036_GG-WUR-162_GG-WUR-256_GG-WUR-239_GG-WUR-051_GG-WUR-092_GG-WUR-163_GG-WUR-069_GG-WUR-115_GG-WUR-130_GG-WUR-238_GG-WUR-236_GG-WUR-123_GG-WUR-055_GG-WUR-263_GG-WUR-175_GG-WUR-050_GG-WUR-153_G…	350	14|4|0	missense_variant	MODERATE	-	ENSGALG00000013268	ENSGALT00000021845	28/76	-	3660-3661	3636-3637	1212-1213	LP/LS	ctTCca/ctGTca	-	-	-6.071	PTHR10676:SF240&PTHR10676	dynein complex [GO:0030286]; ATP binding [GO:0005524]; ATPase activity [GO:0016887]; microtubule motor activity [GO:0003777]; microtubule-based movement [GO:0007018]	-	NO
2	97437198	TG	CG	106857	246	445	492	0.904472	416	29	WA_WD_W1	0:69,0:78,29:61	.:GG-WUR-108_GG-WUR-262_GG-WUR-068_GG-WUR-154_GG-WUR-042_GG-WUR-114_GG-WUR-121_GG-WUR-156_GG-WUR-059_GG-WUR-253_GG-WUR-116_GG-WUR-261_GG-WUR-257_GG-WUR-113_GG-WUR-120_GG-WUR-159_GG-WUR-258_GG-WUR-036_GG-WUR-162_GG-WUR-256_GG-WUR-051_GG-WUR-092_GG-WUR-163_GG-WUR-069_GG-WUR-115_GG-WUR-130_GG-WUR-238_GG-WUR-236_GG-WUR-123_GG-WUR-055_GG-WUR-263_GG-WUR-175_GG-WUR-050_GG-WUR-153_GG-WUR-118_GG-WUR-259_G…	350	59|9|2	start_lost	HIGH	AFG3L2	ENSGALG00000013853	ENSGALT00000075042	1/17	-	943-944	2-mrt	1	M/T	aTG/aCG	-	deleterious_low_confidence(0)	NA	-	integral component of membrane [GO:0016021]; mitochondrial inner membrane [GO:0005743]; ATP binding [GO:0005524]; ATP-dependent peptidase activity [GO:0004176]; metalloendopeptidase activity [GO:0004222]; metallopeptidase activity [GO:0008237]; zinc ion binding [GO:0008270]; cristae formation [GO:0042407]; mitochondrial fusion [GO:0008053]; mitochondrial protein processing [GO:0034982]; nerve dev…	muscle,behavior,growth/size/body,immune,cellular,mortality/aging,nervous system,hematopoietic	YES
2	97437216	AT	AGT	96013.9	247	447	494	0.904858	418	29	WA_WD_W1	0:69,0:78,29:62	.:GG-WUR-108_GG-WUR-262_GG-WUR-068_GG-WUR-154_GG-WUR-042_GG-WUR-114_GG-WUR-121_GG-WUR-156_GG-WUR-059_GG-WUR-253_GG-WUR-116_GG-WUR-261_GG-WUR-257_GG-WUR-113_GG-WUR-120_GG-WUR-159_GG-WUR-258_GG-WUR-036_GG-WUR-162_GG-WUR-256_GG-WUR-239_GG-WUR-051_GG-WUR-092_GG-WUR-163_GG-WUR-069_GG-WUR-115_GG-WUR-130_GG-WUR-238_GG-WUR-236_GG-WUR-123_GG-WUR-055_GG-WUR-263_GG-WUR-175_GG-WUR-050_GG-WUR-153_GG-WUR-118_G…	200	59|9|2	frameshift_variant	HIGH	AFG3L2	ENSGALG00000013853	ENSGALT00000075042	1/17	-	962	21	7	H/QX	caT/caGT	-	-	NA	MF_01458	integral component of membrane [GO:0016021]; mitochondrial inner membrane [GO:0005743]; ATP binding [GO:0005524]; ATP-dependent peptidase activity [GO:0004176]; metalloendopeptidase activity [GO:0004222]; metallopeptidase activity [GO:0008237]; zinc ion binding [GO:0008270]; cristae formation [GO:0042407]; mitochondrial fusion [GO:0008053]; mitochondrial protein processing [GO:0034982]; nerve dev…	muscle,behavior,growth/size/body,immune,cellular,mortality/aging,nervous system,hematopoietic	YES
2	97437243	T	C	111783	248	449	496	0.905242	420	29	WA_WD_W1	0:71,0:77,29:62	.:GG-WUR-108_GG-WUR-262_GG-WUR-068_GG-WUR-154_GG-WUR-042_GG-WUR-114_GG-WUR-121_GG-WUR-156_GG-WUR-059_GG-WUR-253_GG-WUR-116_GG-WUR-261_GG-WUR-257_GG-WUR-113_GG-WUR-120_GG-WUR-117_GG-WUR-159_GG-WUR-258_GG-WUR-036_GG-WUR-162_GG-WUR-256_GG-WUR-239_GG-WUR-051_GG-WUR-092_GG-WUR-163_GG-WUR-069_GG-WUR-115_GG-WUR-130_GG-WUR-238_GG-WUR-236_GG-WUR-123_GG-WUR-055_GG-WUR-263_GG-WUR-175_GG-WUR-050_GG-WUR-153_G…	268	59|9|2	missense_variant	MODERATE	AFG3L2	ENSGALG00000013853	ENSGALT00000075042	1/17	-	988	47	16	L/S	tTa/tCa	-	deleterious_low_confidence(0)	-0.163	MF_01458	integral component of membrane [GO:0016021]; mitochondrial inner membrane [GO:0005743]; ATP binding [GO:0005524]; ATP-dependent peptidase activity [GO:0004176]; metalloendopeptidase activity [GO:0004222]; metallopeptidase activity [GO:0008237]; zinc ion binding [GO:0008270]; cristae formation [GO:0042407]; mitochondrial fusion [GO:0008053]; mitochondrial protein processing [GO:0034982]; nerve dev…	muscle,behavior,growth/size/body,immune,cellular,mortality/aging,nervous system,hematopoietic	YES
2	101326426	GCC	GCCC	106537	244	470	488	0.963115	452	18	WA_WD_W1	6:65,4:70,8:91	GG-WUR-257_GG-WUR-122_GG-WUR-096_GG-WUR-260_GG-WUR-097_GG-WUR-094:GG-WUR-108_GG-WUR-262_GG-WUR-068_GG-WUR-154_GG-WUR-042_GG-WUR-114_GG-WUR-121_GG-WUR-156_GG-WUR-059_GG-WUR-253_GG-WUR-116_GG-WUR-261_GG-WUR-113_GG-WUR-120_GG-WUR-117_GG-WUR-159_GG-WUR-258_GG-WUR-036_GG-WUR-162_GG-WUR-256_GG-WUR-239_GG-WUR-051_GG-WUR-092_GG-WUR-163_GG-WUR-069_GG-WUR-115_GG-WUR-130_GG-WUR-238_GG-WUR-236_GG-WUR-123_GG-…	758	49|22|0	frameshift_variant	HIGH	EMILIN2	ENSGALG00000032997	ENSGALT00000058834	7/8	-	2920-2921	2770-2771	924	G/GX	GGc/GGGc	-	-	NA	Low_complexity_(Seg):seg&PTHR15427:SF5&PTHR15427	-	homeostasis,hematopoietic	YES
2	102943441	CCA	CCG	94156.6	242	484	484	1	484	0	WA_WD_W1	0:69,0:74,0:99	.:GG-WUR-108_GG-WUR-262_GG-WUR-154_GG-WUR-042_GG-WUR-114_GG-WUR-121_GG-WUR-156_GG-WUR-059_GG-WUR-253_GG-WUR-116_GG-WUR-261_GG-WUR-257_GG-WUR-113_GG-WUR-120_GG-WUR-117_GG-WUR-159_GG-WUR-258_GG-WUR-036_GG-WUR-162_GG-WUR-256_GG-WUR-239_GG-WUR-051_GG-WUR-092_GG-WUR-163_GG-WUR-069_GG-WUR-115_GG-WUR-130_GG-WUR-238_GG-WUR-236_GG-WUR-123_GG-WUR-055_GG-WUR-263_GG-WUR-175_GG-WUR-050_GG-WUR-153_GG-WUR-118_G…	1537	52|4|6	missense_variant	MODERATE	GATA6	ENSGALG00000014976	ENSGALT00000031549	5/6	-	982-984	982-984	328	P/S	CCA/TCG	-	tolerated(0.14)	-3.887	PTHR10071:SF23&PTHR10071&PIRSF_domain:PIRSF003028	nucleus [GO:0005634]; transcription factor complex [GO:0005667]; chromatin binding [GO:0003682]; RNA polymerase II regulatory region sequence-specific DNA binding [GO:0000977]; RNA polymerase II transcription factor binding [GO:0001085]; transcriptional activator activity, RNA polymerase II transcription regulatory region sequence-specific binding [GO:0001228]; zinc ion binding [GO:0008270]; anat…	embryo,limbs/digits/tail,reproductive,growth/size/body,liver/biliary,cellular,mortality/aging,homeostasis,cardiovascular	NO
2	108254408	CCC	TCT	70997.3	231	441	462	0.954545	426	15	WA_WD_W1	0:66,14:56,1:91	.:GG-WUR-108_GG-WUR-262_GG-WUR-068_GG-WUR-154_GG-WUR-114_GG-WUR-121_GG-WUR-156_GG-WUR-059_GG-WUR-253_GG-WUR-116_GG-WUR-261_GG-WUR-257_GG-WUR-113_GG-WUR-120_GG-WUR-117_GG-WUR-159_GG-WUR-258_GG-WUR-036_GG-WUR-162_GG-WUR-256_GG-WUR-239_GG-WUR-051_GG-WUR-092_GG-WUR-163_GG-WUR-069_GG-WUR-115_GG-WUR-130_GG-WUR-238_GG-WUR-236_GG-WUR-123_GG-WUR-055_GG-WUR-263_GG-WUR-175_GG-WUR-050_GG-WUR-153_GG-WUR-118_G…	1503	59|15|0	missense_variant	MODERATE	PRKDC	ENSGALG00000042469	ENSGALT00000065303	85/85	-	12298-12300	12298-12300	4100	G/R	GGG/AGA	-	deleterious(0)	-6.058	PROSITE_profiles:PS51190&PROSITE_profiles:PS50290&PTHR11139:SF68&PTHR11139&1.10.1070.11&SMART_domains:SM01343	nucleus [GO:0005634]; ATP binding [GO:0005524]; DNA binding [GO:0003677]; DNA-dependent protein kinase activity [GO:0004677]; double-strand break repair via nonhomologous end joining [GO:0006303]nucleus [GO:0005634]; ATP binding [GO:0005524]; DNA binding [GO:0003677]; DNA-dependent protein kinase activity [GO:0004677]; double-strand break repair via nonhomologous end joining [GO:0006303]	respiratory,growth/size/body,endocrine/exocrine,liver/biliary,immune,renal/urinary,neoplasm,hematopoietic,cellular,mortality/aging,integument,pigmentation,homeostasis,digestive/alimentary	YES
2	109452752	A	T	85295.2	244	451	488	0.92418	418	33	WA_WD_W1	0:70,0:77,33:62	.:GG-WUR-108_GG-WUR-262_GG-WUR-068_GG-WUR-154_GG-WUR-042_GG-WUR-114_GG-WUR-121_GG-WUR-156_GG-WUR-059_GG-WUR-253_GG-WUR-116_GG-WUR-261_GG-WUR-257_GG-WUR-113_GG-WUR-120_GG-WUR-117_GG-WUR-159_GG-WUR-258_GG-WUR-036_GG-WUR-162_GG-WUR-239_GG-WUR-051_GG-WUR-092_GG-WUR-163_GG-WUR-069_GG-WUR-115_GG-WUR-130_GG-WUR-238_GG-WUR-236_GG-WUR-123_GG-WUR-055_GG-WUR-263_GG-WUR-175_GG-WUR-050_GG-WUR-153_GG-WUR-118_G…	-84	0|0|0	splice_donor_variant&non_coding_transcript_variant	HIGH	-	ENSGALG00000039148	ENSGALT00000060007	-	4/4	-	-	-	-	-	-	-	NA	-		-	YES
2	116118586	CTTTTTTTA	CTTTTTTTTA	81429	229	457	458	0.997817	456	1	WA_WD_W1	1:59,0:74,0:95	GG-WUR-237:GG-WUR-108_GG-WUR-068_GG-WUR-154_GG-WUR-042_GG-WUR-121_GG-WUR-156_GG-WUR-059_GG-WUR-116_GG-WUR-257_GG-WUR-113_GG-WUR-120_GG-WUR-117_GG-WUR-036_GG-WUR-162_GG-WUR-256_GG-WUR-239_GG-WUR-051_GG-WUR-092_GG-WUR-163_GG-WUR-115_GG-WUR-130_GG-WUR-238_GG-WUR-236_GG-WUR-123_GG-WUR-055_GG-WUR-175_GG-WUR-050_GG-WUR-153_GG-WUR-118_GG-WUR-259_GG-WUR-252_GG-WUR-111_GG-WUR-254_GG-WUR-134_GG-WUR-119_GG-…	396	61|8|0	splice_acceptor_variant	HIGH	PREX2	ENSGALG00000042354	ENSGALT00000073633	-	20/25	-	-	-	-	-	-	-	NA	-	intracellular [GO:0005622]; Rho guanyl-nucleotide exchange factor activity [GO:0005089]; intracellular signal transduction [GO:0035556]; regulation of Rho protein signal transduction [GO:0035023]	growth/size/body,nervous system,behavior,homeostasis	NO
2	116126316	CTC	CC	78915.3	218	436	436	1	436	0	WA_WD_W1	0:60,0:73,0:85	.:GG-WUR-108_GG-WUR-262_GG-WUR-154_GG-WUR-042_GG-WUR-114_GG-WUR-121_GG-WUR-156_GG-WUR-059_GG-WUR-116_GG-WUR-257_GG-WUR-113_GG-WUR-120_GG-WUR-117_GG-WUR-159_GG-WUR-036_GG-WUR-162_GG-WUR-051_GG-WUR-092_GG-WUR-163_GG-WUR-069_GG-WUR-115_GG-WUR-130_GG-WUR-238_GG-WUR-123_GG-WUR-055_GG-WUR-263_GG-WUR-050_GG-WUR-153_GG-WUR-118_GG-WUR-259_GG-WUR-252_GG-WUR-111_GG-WUR-134_GG-WUR-119_GG-WUR-122_GG-WUR-088_G…	1008	61|8|0	frameshift_variant	HIGH	PREX2	ENSGALG00000042354	ENSGALT00000073633	25/26	-	3304-3305	3304-3305	1102	S/X	TCc/Cc	-	-	NA	-	intracellular [GO:0005622]; Rho guanyl-nucleotide exchange factor activity [GO:0005089]; intracellular signal transduction [GO:0035556]; regulation of Rho protein signal transduction [GO:0035023]	growth/size/body,nervous system,behavior,homeostasis	NO
2	118057807	G	A	101611	234	448	468	0.957265	428	20	WA_WD_W1	0:65,0:74,20:75	.:GG-WUR-108_GG-WUR-262_GG-WUR-068_GG-WUR-154_GG-WUR-042_GG-WUR-121_GG-WUR-156_GG-WUR-059_GG-WUR-253_GG-WUR-116_GG-WUR-261_GG-WUR-257_GG-WUR-113_GG-WUR-120_GG-WUR-117_GG-WUR-159_GG-WUR-258_GG-WUR-036_GG-WUR-162_GG-WUR-256_GG-WUR-239_GG-WUR-051_GG-WUR-092_GG-WUR-163_GG-WUR-069_GG-WUR-115_GG-WUR-130_GG-WUR-238_GG-WUR-236_GG-WUR-123_GG-WUR-055_GG-WUR-263_GG-WUR-175_GG-WUR-050_GG-WUR-153_GG-WUR-118_G…	782	51|20|0	missense_variant	MODERATE	TERF1	ENSGALG00000037453	ENSGALT00000046248	3/10	-	313	286	96	D/N	Gat/Aat	-	deleterious(0.03)	1	PTHR21717:SF14&PTHR21717&Pfam_domain:PF08558&1.25.40.210&Superfamily_domains:SSF63600&PD014243	telomeric DNA binding [GO:0042162]telomeric DNA binding [GO:0042162]	embryo,pigmentation,behavior,reproductive,growth/size/body,endocrine/exocrine,nervous system,immune,neoplasm,homeostasis,cellular,mortality/aging,integument,digestive/alimentary,craniofacial,hematopoietic,cardiovascular	YES
2	122035363	ACAGT	GCAGT	75039.5	232	442	464	0.952586	420	22	WA_WD_W1	0:65,0:71,22:74	.:GG-WUR-108_GG-WUR-262_GG-WUR-068_GG-WUR-154_GG-WUR-042_GG-WUR-114_GG-WUR-121_GG-WUR-156_GG-WUR-059_GG-WUR-253_GG-WUR-116_GG-WUR-261_GG-WUR-113_GG-WUR-120_GG-WUR-117_GG-WUR-159_GG-WUR-036_GG-WUR-256_GG-WUR-239_GG-WUR-051_GG-WUR-092_GG-WUR-163_GG-WUR-069_GG-WUR-115_GG-WUR-130_GG-WUR-238_GG-WUR-123_GG-WUR-055_GG-WUR-263_GG-WUR-175_GG-WUR-050_GG-WUR-153_GG-WUR-118_GG-WUR-259_GG-WUR-252_GG-WUR-111_G…	1336	63|2|0	missense_variant	MODERATE	ZFAND1	ENSGALG00000042794	ENSGALT00000076574	1/8	-	52-56	26-30	2017-10-09	HC/RC	cACTGT/cGCTGC	-	-	-4.518	PROSITE_profiles:PS51039&PTHR14677&PTHR14677:SF2&Pfam_domain:PF01428&4.10.1110.10&SMART_domains:SM00154&Superfamily_domains:SSF118310	zinc ion binding [GO:0008270]	-	YES
2	123211944	A	G	61769.6	212	404	424	0.95283	384	20	WA_WD_W1	0:60,0:66,20:66	.:GG-WUR-108_GG-WUR-262_GG-WUR-068_GG-WUR-154_GG-WUR-042_GG-WUR-121_GG-WUR-156_GG-WUR-059_GG-WUR-253_GG-WUR-116_GG-WUR-261_GG-WUR-257_GG-WUR-113_GG-WUR-120_GG-WUR-258_GG-WUR-162_GG-WUR-256_GG-WUR-239_GG-WUR-051_GG-WUR-092_GG-WUR-069_GG-WUR-115_GG-WUR-130_GG-WUR-238_GG-WUR-123_GG-WUR-055_GG-WUR-263_GG-WUR-175_GG-WUR-050_GG-WUR-118_GG-WUR-259_GG-WUR-111_GG-WUR-254_GG-WUR-134_GG-WUR-119_GG-WUR-088_G…	291	63|5|0	missense_variant	MODERATE	LRRCC1	ENSGALG00000039499	ENSGALT00000066569	2/19	-	118	118	40	I/V	Atc/Gtc	-	deleterious(0)	-0.812	PROSITE_profiles:PS51450&PTHR24365&PTHR24365:SF375&3.80.10.10&SMART_domains:SM00365&Superfamily_domains:SSF52058	-	nervous system,reproductive	YES
2	125638723	AT	ATTACAGT	89162.8	236	455	472	0.963983	438	17	WA_WD_W1	5:60,6:69,6:90	GG-WUR-130_GG-WUR-254_GG-WUR-160_GG-WUR-155_GG-WUR-089:GG-WUR-108_GG-WUR-262_GG-WUR-068_GG-WUR-154_GG-WUR-042_GG-WUR-114_GG-WUR-121_GG-WUR-156_GG-WUR-059_GG-WUR-261_GG-WUR-257_GG-WUR-113_GG-WUR-120_GG-WUR-117_GG-WUR-159_GG-WUR-258_GG-WUR-036_GG-WUR-162_GG-WUR-239_GG-WUR-051_GG-WUR-092_GG-WUR-163_GG-WUR-069_GG-WUR-115_GG-WUR-238_GG-WUR-236_GG-WUR-123_GG-WUR-055_GG-WUR-263_GG-WUR-175_GG-WUR-050_GG-…	361	63|1|0	inframe_insertion&splice_region_variant	MODERATE	RUNX1T1	ENSGALG00000033091	ENSGALT00000056472	4/11	-	458	458	153	N/NCN	aAt/aACTGTAAt	-	-	1	Pfam_domain:PF07531&PROSITE_profiles:PS51119&PTHR10379&PTHR10379:SF5&SMART_domains:SM00549&Superfamily_domains:SSF158553	metal ion binding [GO:0046872]; transcription corepressor activity [GO:0003714]; transcription factor activity, sequence-specific DNA binding [GO:0003700]; negative regulation of transcription, DNA-templated [GO:0045892]metal ion binding [GO:0046872]; transcription corepressor activity [GO:0003714]; transcription factor activity, sequence-specific DNA binding [GO:0003700]; negative regulation of …	reproductive,growth/size/body,behavior,no abnormal phenotype observed,mortality/aging,integument,digestive/alimentary,cardiovascular	NO
2	128089929	G	T	105860	243	486	486	1	486	0	WA_WD_W1	0:67,0:76,0:100	.:GG-WUR-262_GG-WUR-068_GG-WUR-154_GG-WUR-042_GG-WUR-114_GG-WUR-121_GG-WUR-156_GG-WUR-059_GG-WUR-253_GG-WUR-116_GG-WUR-261_GG-WUR-257_GG-WUR-113_GG-WUR-120_GG-WUR-117_GG-WUR-159_GG-WUR-036_GG-WUR-162_GG-WUR-239_GG-WUR-051_GG-WUR-092_GG-WUR-163_GG-WUR-069_GG-WUR-115_GG-WUR-130_GG-WUR-238_GG-WUR-236_GG-WUR-123_GG-WUR-055_GG-WUR-263_GG-WUR-175_GG-WUR-050_GG-WUR-153_GG-WUR-118_GG-WUR-259_GG-WUR-111_G…	250	62|9|0	stop_lost	HIGH	POP1	ENSGALG00000032042	ENSGALT00000071182	6/6	-	893	893	298	*/L	tGa/tTa	-	-	NA	-	ribonuclease P activity [GO:0004526]; tRNA 5'-leader removal [GO:0001682]	muscle,homeostasis,behavior,cardiovascular	YES
2	128996391	C	A	97534.4	235	470	470	1	470	0	WA_WD_W1	0:63,0:77,0:95	.:GG-WUR-108_GG-WUR-068_GG-WUR-154_GG-WUR-042_GG-WUR-114_GG-WUR-121_GG-WUR-156_GG-WUR-059_GG-WUR-253_GG-WUR-116_GG-WUR-261_GG-WUR-257_GG-WUR-113_GG-WUR-120_GG-WUR-117_GG-WUR-159_GG-WUR-258_GG-WUR-036_GG-WUR-162_GG-WUR-256_GG-WUR-051_GG-WUR-092_GG-WUR-163_GG-WUR-069_GG-WUR-115_GG-WUR-130_GG-WUR-236_GG-WUR-123_GG-WUR-055_GG-WUR-175_GG-WUR-050_GG-WUR-153_GG-WUR-118_GG-WUR-111_GG-WUR-134_GG-WUR-119_G…	4221	52|18|0	missense_variant	MODERATE	-	ENSGALG00000036019	ENSGALT00000068010	1/4	-	89	88	30	P/T	Cca/Aca	-	deleterious_low_confidence(0)	0.133	-	DNA binding [GO:0003677]; DNA-directed RNA polymerase activity [GO:0003899]; transcription, DNA-templated [GO:0006351]	-	YES
2	138127774	TAAAAAAAG	TAAAAAAAAG	73295.1	228	418	456	0.916667	392	26	WA_WD_W1	0:61,25:41,1:94	.:GG-WUR-108_GG-WUR-262_GG-WUR-068_GG-WUR-154_GG-WUR-042_GG-WUR-114_GG-WUR-121_GG-WUR-156_GG-WUR-059_GG-WUR-253_GG-WUR-116_GG-WUR-261_GG-WUR-257_GG-WUR-120_GG-WUR-117_GG-WUR-159_GG-WUR-036_GG-WUR-256_GG-WUR-051_GG-WUR-092_GG-WUR-069_GG-WUR-115_GG-WUR-130_GG-WUR-238_GG-WUR-236_GG-WUR-123_GG-WUR-055_GG-WUR-050_GG-WUR-153_GG-WUR-118_GG-WUR-252_GG-WUR-111_GG-WUR-254_GG-WUR-134_GG-WUR-119_GG-WUR-122_G…	375	56|18|0	splice_donor_variant&intron_variant	HIGH	ATAD2	ENSGALG00000034348	ENSGALT00000064875	-	18/27	-	-	-	-	-	-	-	NA	-	ATP binding [GO:0005524]	-	NO
2	141501143	C	T	122783	246	492	492	1	492	0	WA_WD_W1	0:68,0:78,0:100	.:GG-WUR-108_GG-WUR-262_GG-WUR-068_GG-WUR-154_GG-WUR-042_GG-WUR-114_GG-WUR-121_GG-WUR-156_GG-WUR-059_GG-WUR-253_GG-WUR-116_GG-WUR-261_GG-WUR-257_GG-WUR-113_GG-WUR-120_GG-WUR-117_GG-WUR-159_GG-WUR-258_GG-WUR-036_GG-WUR-162_GG-WUR-256_GG-WUR-239_GG-WUR-051_GG-WUR-092_GG-WUR-163_GG-WUR-069_GG-WUR-115_GG-WUR-130_GG-WUR-238_GG-WUR-236_GG-WUR-123_GG-WUR-055_GG-WUR-175_GG-WUR-050_GG-WUR-153_GG-WUR-118_G…	-52	34|4|0	splice_donor_variant	HIGH	HHLA1	ENSGALG00000039224	ENSGALT00000072403	-	8/16	-	-	-	-	-	-	-	NA	-	-	-	YES
2	141926329	TTGTC	GTGTC	110021	239	478	478	1	478	0	WA_WD_W1	0:67,0:75,0:97	.:GG-WUR-108_GG-WUR-068_GG-WUR-154_GG-WUR-042_GG-WUR-114_GG-WUR-121_GG-WUR-156_GG-WUR-059_GG-WUR-116_GG-WUR-261_GG-WUR-113_GG-WUR-120_GG-WUR-117_GG-WUR-159_GG-WUR-036_GG-WUR-162_GG-WUR-256_GG-WUR-239_GG-WUR-051_GG-WUR-092_GG-WUR-163_GG-WUR-069_GG-WUR-115_GG-WUR-130_GG-WUR-238_GG-WUR-236_GG-WUR-123_GG-WUR-055_GG-WUR-263_GG-WUR-175_GG-WUR-050_GG-WUR-153_GG-WUR-118_GG-WUR-259_GG-WUR-252_GG-WUR-111_G…	51106	61|27|0	missense_variant	MODERATE	TG	ENSGALG00000039509	ENSGALT00000052672	28/40	-	4170-4174	3550-3554	1184-1185	LS/VS	TTGTCc/GTGTCc	-	-	-5.283	-	-	embryo,,skeleton,pigmentation,growth/size/body,endocrine/exocrine,liver/biliary,integument,homeostasis,cardiovascular,immune,limbs/digits/tail,hearing/vestibular/ear,neoplasm,mortality/aging,nervous system,craniofacial,vision/eye,cellular,taste/olfaction,respiratory,reproductive,adipose,renal/urinary,behavior,no abnormal phenotype observed,muscle,hematopoietic,digestive/alimentary	YES
2	149284604	G	C	87251.8	234	468	468	1	468	0	WA_WD_W1	0:63,0:75,0:96	.:GG-WUR-108_GG-WUR-262_GG-WUR-068_GG-WUR-154_GG-WUR-042_GG-WUR-114_GG-WUR-121_GG-WUR-156_GG-WUR-059_GG-WUR-253_GG-WUR-116_GG-WUR-261_GG-WUR-113_GG-WUR-120_GG-WUR-117_GG-WUR-159_GG-WUR-258_GG-WUR-036_GG-WUR-239_GG-WUR-051_GG-WUR-092_GG-WUR-163_GG-WUR-069_GG-WUR-115_GG-WUR-130_GG-WUR-236_GG-WUR-123_GG-WUR-055_GG-WUR-175_GG-WUR-153_GG-WUR-259_GG-WUR-252_GG-WUR-111_GG-WUR-254_GG-WUR-134_GG-WUR-119_G…	342	55|0|2	missense_variant	MODERATE	MAPK15	ENSGALG00000029279	ENSGALT00000047376	10/14	-	972	972	324	K/N	aaG/aaC	-	deleterious(0.02)	-2.349	PTHR24055&PTHR24055:SF79	intracellular [GO:0005622]; ATP binding [GO:0005524]; MAP kinase activity [GO:0004707]	-	YES
2	149445013	GG	GC	136034	239	478	478	1	478	0	WA_WD_W1	0:67,0:77,0:95	.:GG-WUR-108_GG-WUR-068_GG-WUR-154_GG-WUR-042_GG-WUR-114_GG-WUR-121_GG-WUR-156_GG-WUR-059_GG-WUR-116_GG-WUR-261_GG-WUR-257_GG-WUR-113_GG-WUR-120_GG-WUR-117_GG-WUR-159_GG-WUR-258_GG-WUR-036_GG-WUR-162_GG-WUR-256_GG-WUR-239_GG-WUR-051_GG-WUR-092_GG-WUR-163_GG-WUR-069_GG-WUR-130_GG-WUR-238_GG-WUR-236_GG-WUR-123_GG-WUR-055_GG-WUR-263_GG-WUR-175_GG-WUR-050_GG-WUR-153_GG-WUR-118_GG-WUR-259_GG-WUR-252_G…	1338	50|29|0	missense_variant	MODERATE	PUF60	ENSGALG00000039901	ENSGALT00000050630	10/11	-	1202-1203	1024-1025	342	P/A	CCt/GCt	-	deleterious_low_confidence(0)	-3.575	TIGRFAM_domain:TIGR01645	nucleotide binding [GO:0000166]; RNA binding [GO:0003723]nucleotide binding [GO:0000166]; RNA binding [GO:0003723]nucleic acid binding [GO:0003676]; nucleotide binding [GO:0000166]	-	NO
3	118861	TAAAAAAAAAC	TAAAAAAAAAAC	74388	231	429	462	0.928571	412	17	WA_WD_W1	2:59,0:76,15:79	GG-WUR-252_GG-WUR-160:GG-WUR-108_GG-WUR-068_GG-WUR-154_GG-WUR-042_GG-WUR-121_GG-WUR-156_GG-WUR-059_GG-WUR-253_GG-WUR-116_GG-WUR-261_GG-WUR-113_GG-WUR-120_GG-WUR-117_GG-WUR-159_GG-WUR-036_GG-WUR-162_GG-WUR-239_GG-WUR-051_GG-WUR-092_GG-WUR-163_GG-WUR-069_GG-WUR-115_GG-WUR-130_GG-WUR-238_GG-WUR-236_GG-WUR-123_GG-WUR-055_GG-WUR-175_GG-WUR-050_GG-WUR-153_GG-WUR-118_GG-WUR-111_GG-WUR-134_GG-WUR-119_GG-…	479	62|8|0	splice_donor_variant&intron_variant	HIGH	CCDC88A	ENSGALG00000043587	ENSGALT00000059076	-	4/22	-	-	-	-	-	-	-	NA	-	cell migration [GO:0016477]; regulation of actin cytoskeleton organization [GO:0032956]cell migration [GO:0016477]; regulation of actin cytoskeleton organization [GO:0032956]cell migration [GO:0016477]; regulation of actin cytoskeleton organization [GO:0032956]cell migration [GO:0016477]; regulation of actin cytoskeleton organization [GO:0032956]	behavior,growth/size/body,vision/eye,cellular,mortality/aging,nervous system,cardiovascular	NO
3	3040580	C	G	68967.1	223	428	446	0.959641	410	18	WA_WD_W1	0:61,4:67,14:77	.:GG-WUR-108_GG-WUR-262_GG-WUR-154_GG-WUR-042_GG-WUR-114_GG-WUR-121_GG-WUR-156_GG-WUR-059_GG-WUR-253_GG-WUR-116_GG-WUR-261_GG-WUR-257_GG-WUR-120_GG-WUR-117_GG-WUR-159_GG-WUR-258_GG-WUR-162_GG-WUR-256_GG-WUR-239_GG-WUR-051_GG-WUR-092_GG-WUR-163_GG-WUR-069_GG-WUR-115_GG-WUR-130_GG-WUR-238_GG-WUR-123_GG-WUR-055_GG-WUR-263_GG-WUR-050_GG-WUR-153_GG-WUR-118_GG-WUR-259_GG-WUR-252_GG-WUR-111_GG-WUR-134_G…	842	67|2|0	missense_variant	MODERATE	ERLEC1	ENSGALG00000008172	ENSGALT00000013285	1/13	-	13	13	5	G/R	Gga/Cga	-	deleterious_low_confidence(0.01)	-0.853	Low_complexity_(Seg):seg&PTHR15414:SF2&PTHR15414&Cleavage_site_(Signalp):SignalP-noTM	endoplasmic reticulum lumen [GO:0005788]; ER-associated ubiquitin-dependent protein catabolic process [GO:0030433]; negative regulation of retrograde protein transport, ER to cytosol [GO:1904153]; retrograde protein transport, ER to cytosol [GO:0030970]	-	YES
3	3329286	G	A	155437	215	430	430	1	430	0	WA_WD_W1	0:52,0:75,0:88	.:GG-WUR-108_GG-WUR-068_GG-WUR-154_GG-WUR-042_GG-WUR-114_GG-WUR-121_GG-WUR-156_GG-WUR-059_GG-WUR-116_GG-WUR-113_GG-WUR-120_GG-WUR-117_GG-WUR-159_GG-WUR-036_GG-WUR-162_GG-WUR-051_GG-WUR-092_GG-WUR-163_GG-WUR-069_GG-WUR-115_GG-WUR-130_GG-WUR-123_GG-WUR-055_GG-WUR-175_GG-WUR-050_GG-WUR-153_GG-WUR-111_GG-WUR-134_GG-WUR-119_GG-WUR-122_GG-WUR-088_GG-WUR-147_GG-WUR-090_GG-WUR-096_GG-WUR-136_GG-WUR-160_G…	767	52|6|0	missense_variant	MODERATE	CD93	ENSGALG00000008359	ENSGALT00000013613	1/1	-	832	779	260	R/Q	cGg/cAg	-	deleterious(0.04)	-2.733	PTHR24044:SF279&PTHR24044&Pfam_domain:PF14670&2.10.25.10&SMART_domains:SM00181&Superfamily_domains:SSF57184	cell surface [GO:0009986]; cytoplasmic vesicle [GO:0031410]; extracellular matrix [GO:0031012]; integral component of membrane [GO:0016021]; plasma membrane [GO:0005886]; calcium ion binding [GO:0005509]; single organismal cell-cell adhesion [GO:0016337]	immune,hematopoietic	YES
3	4497117	ACAG	GCAG	98476.1	244	483	488	0.989754	478	5	WA_WD_W1	0:67,0:78,5:94	.:GG-WUR-108_GG-WUR-262_GG-WUR-068_GG-WUR-154_GG-WUR-042_GG-WUR-114_GG-WUR-121_GG-WUR-156_GG-WUR-059_GG-WUR-253_GG-WUR-116_GG-WUR-261_GG-WUR-257_GG-WUR-113_GG-WUR-120_GG-WUR-117_GG-WUR-159_GG-WUR-162_GG-WUR-256_GG-WUR-051_GG-WUR-092_GG-WUR-163_GG-WUR-069_GG-WUR-115_GG-WUR-130_GG-WUR-238_GG-WUR-123_GG-WUR-055_GG-WUR-263_GG-WUR-175_GG-WUR-050_GG-WUR-153_GG-WUR-118_GG-WUR-259_GG-WUR-252_GG-WUR-111_G…	2119	58|26|9	splice_acceptor_variant&intron_variant	HIGH	XDH	ENSGALG00000008701	ENSGALT00000014160	-	9/36	-	-	-	-	-	-	-	NA	-	extracellular space [GO:0005615]; sarcoplasmic reticulum [GO:0016529]; 2 iron, 2 sulfur cluster binding [GO:0051537]; electron carrier activity [GO:0009055]; flavin adenine dinucleotide binding [GO:0050660]; iron ion binding [GO:0005506]; molybdenum ion binding [GO:0030151]; molybdopterin cofactor binding [GO:0043546]; oxidoreductase activity, acting on CH-OH group of donors [GO:0016614]; xanthin…	growth/size/body,adipose,endocrine/exocrine,immune,renal/urinary,cellular,mortality/aging,integument,muscle,homeostasis	YES
3	8676396	T	C	134291	246	492	492	1	492	0	WA_WD_W1	0:71,0:78,0:97	.:GG-WUR-108_GG-WUR-262_GG-WUR-068_GG-WUR-154_GG-WUR-042_GG-WUR-114_GG-WUR-121_GG-WUR-156_GG-WUR-059_GG-WUR-253_GG-WUR-116_GG-WUR-261_GG-WUR-257_GG-WUR-113_GG-WUR-120_GG-WUR-117_GG-WUR-159_GG-WUR-258_GG-WUR-036_GG-WUR-162_GG-WUR-256_GG-WUR-239_GG-WUR-051_GG-WUR-092_GG-WUR-163_GG-WUR-069_GG-WUR-115_GG-WUR-130_GG-WUR-238_GG-WUR-236_GG-WUR-123_GG-WUR-055_GG-WUR-263_GG-WUR-175_GG-WUR-050_GG-WUR-153_G…	3523	63|10|0	missense_variant	MODERATE	MSH2	ENSGALG00000008962	ENSGALT00000014573	10/16	-	1679	1637	546	M/T	aTg/aCg	-	deleterious(0.01)	0.079	PTHR11361&PTHR11361:SF35&Pfam_domain:PF05190&Pfam_domain:PF05192&PIRSF_domain:PIRSF005813&SMART_domains:SM00533&Superfamily_domains:SSF48334	membrane [GO:0016020]; MutSalpha complex [GO:0032301]; MutSbeta complex [GO:0032302]; nuclear chromosome [GO:0000228]; nuclear chromosome, telomeric region [GO:0000784]; ADP binding [GO:0043531]; ATP binding [GO:0005524]; ATPase activity [GO:0016887]; centromeric DNA binding [GO:0019237]; damaged DNA binding [GO:0003684]; dinucleotide repeat insertion binding [GO:0032181]; double-strand/single-st…	immune,neoplasm,hematopoietic,cellular,mortality/aging,integument,homeostasis,digestive/alimentary	YES
3	15350892	CTA	CTG	118961	244	487	488	0.997951	486	1	WA_WD_W1	1:70,0:76,0:97	GG-WUR-116:GG-WUR-108_GG-WUR-262_GG-WUR-068_GG-WUR-154_GG-WUR-042_GG-WUR-114_GG-WUR-121_GG-WUR-156_GG-WUR-059_GG-WUR-253_GG-WUR-261_GG-WUR-257_GG-WUR-113_GG-WUR-120_GG-WUR-117_GG-WUR-159_GG-WUR-258_GG-WUR-036_GG-WUR-162_GG-WUR-256_GG-WUR-239_GG-WUR-051_GG-WUR-092_GG-WUR-163_GG-WUR-069_GG-WUR-115_GG-WUR-130_GG-WUR-238_GG-WUR-236_GG-WUR-123_GG-WUR-055_GG-WUR-263_GG-WUR-175_GG-WUR-050_GG-WUR-153_GG-…	1302	64|10|0	missense_variant	MODERATE	CCT4	ENSGALG00000008812	ENSGALT00000055912	9/12	-	931-933	931-933	311	L/V	CTA/GTG	-	deleterious(0.02)	-2.529	Low_complexity_(Seg):seg&PTHR11353&TIGRFAM_domain:TIGR02342&3.50.7.10&Pfam_domain:PF00118&Superfamily_domains:SSF52029	cytoplasm [GO:0005737]; integral component of membrane [GO:0016021]; ATP binding [GO:0005524]; protein folding [GO:0006457]chaperonin-containing T-complex [GO:0005832]; ATP binding [GO:0005524]; protein binding involved in protein folding [GO:0044183]; unfolded protein binding [GO:0051082]; 'de novo' protein folding [GO:0006458]; chaperone-mediated protein folding [GO:0061077]	-	NO
3	17214429	AAG	CAT	97162.2	231	425	462	0.919913	400	25	WA_WD_W1	25:30,0:75,0:95	GG-WUR-262_GG-WUR-154_GG-WUR-156_GG-WUR-113_GG-WUR-117_GG-WUR-159_GG-WUR-239_GG-WUR-163_GG-WUR-238_GG-WUR-236_GG-WUR-123_GG-WUR-055_GG-WUR-175_GG-WUR-050_GG-WUR-118_GG-WUR-254_GG-WUR-088_GG-WUR-039_GG-WUR-260_GG-WUR-097_GG-WUR-255_GG-WUR-094_GG-WUR-155_GG-WUR-052_GG-WUR-143:GG-WUR-108_GG-WUR-042_GG-WUR-114_GG-WUR-121_GG-WUR-059_GG-WUR-116_GG-WUR-120_GG-WUR-162_GG-WUR-092_GG-WUR-069_GG-WUR-115_GG-…	250	61|3|0	splice_acceptor_variant&intron_variant	HIGH	TMEM63A	ENSGALG00000009275	ENSGALT00000082486	-	10/19	-	-	-	-	-	-	-	NA	-	extracellular exosome [GO:0070062]; integral component of membrane [GO:0016021]; lysosomal membrane [GO:0005765]; nucleic acid binding [GO:0003676]; nucleotide binding [GO:0000166]	limbs/digits/tail,skeleton	YES
3	17228360	G	A	139562	245	490	490	1	490	0	WA_WD_W1	0:70,0:78,0:97	.:GG-WUR-108_GG-WUR-262_GG-WUR-068_GG-WUR-154_GG-WUR-042_GG-WUR-114_GG-WUR-121_GG-WUR-156_GG-WUR-059_GG-WUR-253_GG-WUR-116_GG-WUR-261_GG-WUR-257_GG-WUR-113_GG-WUR-120_GG-WUR-117_GG-WUR-159_GG-WUR-258_GG-WUR-036_GG-WUR-162_GG-WUR-256_GG-WUR-239_GG-WUR-051_GG-WUR-092_GG-WUR-163_GG-WUR-069_GG-WUR-115_GG-WUR-130_GG-WUR-238_GG-WUR-236_GG-WUR-123_GG-WUR-055_GG-WUR-263_GG-WUR-175_GG-WUR-050_GG-WUR-153_G…	325	61|3|0	missense_variant	MODERATE	TMEM63A	ENSGALG00000009275	ENSGALT00000064637	19/19	-	2116	2116	706	E/K	Gaa/Aaa	-	deleterious_low_confidence(0.02)	-1.308	-	extracellular exosome [GO:0070062]; integral component of membrane [GO:0016021]; lysosomal membrane [GO:0005765]; nucleic acid binding [GO:0003676]; nucleotide binding [GO:0000166]	limbs/digits/tail,skeleton	YES
3	18041777	T	C	75985	229	458	458	1	458	0	WA_WD_W1	0:67,0:72,0:90	.:GG-WUR-108_GG-WUR-262_GG-WUR-068_GG-WUR-154_GG-WUR-042_GG-WUR-114_GG-WUR-121_GG-WUR-156_GG-WUR-059_GG-WUR-253_GG-WUR-116_GG-WUR-261_GG-WUR-257_GG-WUR-113_GG-WUR-120_GG-WUR-117_GG-WUR-159_GG-WUR-036_GG-WUR-162_GG-WUR-256_GG-WUR-239_GG-WUR-051_GG-WUR-092_GG-WUR-163_GG-WUR-069_GG-WUR-115_GG-WUR-130_GG-WUR-238_GG-WUR-236_GG-WUR-123_GG-WUR-055_GG-WUR-263_GG-WUR-175_GG-WUR-050_GG-WUR-153_GG-WUR-118_G…	1158	56|32|0	stop_lost	HIGH	-	ENSGALG00000041034	ENSGALT00000063280	6/6	-	616	530	177	*/W	tAg/tGg	-	-	NA	-	-	-	NO
3	18702288	CG	CA	118862	249	498	498	1	498	0	WA_WD_W1	0:70,0:78,0:101	.:GG-WUR-108_GG-WUR-262_GG-WUR-068_GG-WUR-154_GG-WUR-042_GG-WUR-114_GG-WUR-121_GG-WUR-156_GG-WUR-059_GG-WUR-253_GG-WUR-116_GG-WUR-261_GG-WUR-113_GG-WUR-120_GG-WUR-117_GG-WUR-159_GG-WUR-258_GG-WUR-036_GG-WUR-162_GG-WUR-256_GG-WUR-239_GG-WUR-051_GG-WUR-092_GG-WUR-163_GG-WUR-069_GG-WUR-115_GG-WUR-130_GG-WUR-238_GG-WUR-236_GG-WUR-123_GG-WUR-055_GG-WUR-263_GG-WUR-175_GG-WUR-050_GG-WUR-153_GG-WUR-118_G…	202	57|14|0	stop_gained	HIGH	MARK1	ENSGALG00000009483	ENSGALT00000054272	2/17	-	88-89	88-89	30	R/*	CGa/TGa	-	-	NA	PTHR24346:SF21&PTHR24346	ATP binding [GO:0005524]; protein serine/threonine kinase activity [GO:0004674]; establishment of cell polarity [GO:0030010]; microtubule cytoskeleton organization [GO:0000226]ATP binding [GO:0005524]; protein serine/threonine kinase activity [GO:0004674]; establishment of cell polarity [GO:0030010]; microtubule cytoskeleton organization [GO:0000226]ATP binding [GO:0005524]; protein serine/threon…	-	NO
3	18790883	A	G	101409	240	480	480	1	480	0	WA_WD_W1	0:64,0:77,0:99	.:GG-WUR-108_GG-WUR-262_GG-WUR-068_GG-WUR-154_GG-WUR-042_GG-WUR-114_GG-WUR-121_GG-WUR-156_GG-WUR-059_GG-WUR-116_GG-WUR-261_GG-WUR-257_GG-WUR-113_GG-WUR-120_GG-WUR-159_GG-WUR-258_GG-WUR-036_GG-WUR-162_GG-WUR-256_GG-WUR-239_GG-WUR-051_GG-WUR-092_GG-WUR-163_GG-WUR-069_GG-WUR-115_GG-WUR-130_GG-WUR-238_GG-WUR-236_GG-WUR-123_GG-WUR-055_GG-WUR-263_GG-WUR-175_GG-WUR-050_GG-WUR-153_GG-WUR-118_GG-WUR-259_G…	1924	62|13|0	missense_variant	MODERATE	RAB3GAP2	ENSGALG00000009503	ENSGALT00000015469	19/35	-	2001	1973	658	D/G	gAc/gGc	-	tolerated(0.09)	-3.1	PTHR12472	cytoplasm [GO:0005737]; plasma membrane [GO:0005886]; protein complex [GO:0043234]; Rab guanyl-nucleotide exchange factor activity [GO:0017112]; establishment of protein localization to endoplasmic reticulum membrane [GO:0097051]; positive regulation of autophagosome assembly [GO:2000786]; positive regulation of endoplasmic reticulum tubular network organization [GO:1903373]; positive regulation …	-	YES
3	20220284	G	A	111266	245	490	490	1	490	0	WA_WD_W1	0:67,0:77,0:101	.:GG-WUR-108_GG-WUR-068_GG-WUR-154_GG-WUR-042_GG-WUR-114_GG-WUR-121_GG-WUR-156_GG-WUR-059_GG-WUR-253_GG-WUR-116_GG-WUR-261_GG-WUR-257_GG-WUR-113_GG-WUR-120_GG-WUR-117_GG-WUR-159_GG-WUR-036_GG-WUR-162_GG-WUR-256_GG-WUR-239_GG-WUR-051_GG-WUR-092_GG-WUR-163_GG-WUR-069_GG-WUR-115_GG-WUR-130_GG-WUR-238_GG-WUR-236_GG-WUR-123_GG-WUR-055_GG-WUR-263_GG-WUR-175_GG-WUR-050_GG-WUR-153_GG-WUR-118_GG-WUR-259_G…	457	53|24|0	missense_variant	MODERATE	ESRRG	ENSGALG00000009645	ENSGALT00000049609	1/7	-	28	28	10	G/R	Ggg/Agg	-	deleterious_low_confidence(0)	-0.194	PTHR24084&PTHR24084:SF21&PIRSF_domain:PIRSF002527	nucleus [GO:0005634]; sequence-specific DNA binding [GO:0043565]; steroid binding [GO:0005496]; steroid hormone receptor activity [GO:0003707]; transcription factor activity, sequence-specific DNA binding [GO:0003700]; zinc ion binding [GO:0008270]; transcription, DNA-templated [GO:0006351]nucleus [GO:0005634]; sequence-specific DNA binding [GO:0043565]; steroid binding [GO:0005496]; steroid horm…	behavior,growth/size/body,hearing/vestibular/ear,renal/urinary,cellular,mortality/aging,homeostasis,cardiovascular	YES
3	20220302	C	T	102909	240	480	480	1	480	0	WA_WD_W1	0:67,0:76,0:97	.:GG-WUR-108_GG-WUR-068_GG-WUR-154_GG-WUR-042_GG-WUR-114_GG-WUR-121_GG-WUR-156_GG-WUR-059_GG-WUR-253_GG-WUR-116_GG-WUR-261_GG-WUR-257_GG-WUR-113_GG-WUR-120_GG-WUR-117_GG-WUR-159_GG-WUR-036_GG-WUR-162_GG-WUR-256_GG-WUR-239_GG-WUR-051_GG-WUR-092_GG-WUR-163_GG-WUR-069_GG-WUR-115_GG-WUR-130_GG-WUR-238_GG-WUR-236_GG-WUR-123_GG-WUR-055_GG-WUR-263_GG-WUR-175_GG-WUR-050_GG-WUR-153_GG-WUR-118_GG-WUR-259_G…	564	53|24|0	missense_variant	MODERATE	ESRRG	ENSGALG00000009645	ENSGALT00000049609	1/7	-	46	46	16	R/C	Cgc/Tgc	-	deleterious_low_confidence(0.04)	0.184	PTHR24084&PTHR24084:SF21&PIRSF_domain:PIRSF002527	nucleus [GO:0005634]; sequence-specific DNA binding [GO:0043565]; steroid binding [GO:0005496]; steroid hormone receptor activity [GO:0003707]; transcription factor activity, sequence-specific DNA binding [GO:0003700]; zinc ion binding [GO:0008270]; transcription, DNA-templated [GO:0006351]nucleus [GO:0005634]; sequence-specific DNA binding [GO:0043565]; steroid binding [GO:0005496]; steroid horm…	behavior,growth/size/body,hearing/vestibular/ear,renal/urinary,cellular,mortality/aging,homeostasis,cardiovascular	YES
3	21070023	A	T	84488.7	234	442	468	0.944444	420	22	WA_WD_W1	0:63,22:51,0:96	.:GG-WUR-108_GG-WUR-262_GG-WUR-068_GG-WUR-154_GG-WUR-042_GG-WUR-114_GG-WUR-121_GG-WUR-156_GG-WUR-059_GG-WUR-253_GG-WUR-257_GG-WUR-113_GG-WUR-120_GG-WUR-117_GG-WUR-159_GG-WUR-258_GG-WUR-162_GG-WUR-256_GG-WUR-239_GG-WUR-051_GG-WUR-092_GG-WUR-163_GG-WUR-069_GG-WUR-115_GG-WUR-130_GG-WUR-238_GG-WUR-123_GG-WUR-055_GG-WUR-263_GG-WUR-175_GG-WUR-050_GG-WUR-153_GG-WUR-118_GG-WUR-259_GG-WUR-252_GG-WUR-111_G…	1316	56|4|0	missense_variant	MODERATE	CENPF	ENSGALG00000009690	ENSGALT00000015897	7/20	-	995	916	306	Y/N	Tat/Aat	-	tolerated(0.1)	-4.043	Coiled-coils_(Ncoils):Coil&PTHR18874	axoneme [GO:0005930]; centrosome [GO:0005813]; ciliary basal body [GO:0036064]; ciliary transition fiber [GO:0097539]; condensed chromosome outer kinetochore [GO:0000940]; cytoplasm [GO:0005737]; midbody [GO:0030496]; nuclear envelope [GO:0005635]; nuclear matrix [GO:0016363]; nucleoplasm [GO:0005654]; pronucleus [GO:0045120]; spindle pole [GO:0000922]; kidney development [GO:0001822]; metaphase …	mortality/aging,growth/size/body,muscle,cellular,cardiovascular	YES
3	22557156	A	G	101865	244	482	488	0.987705	476	6	WA_WD_W1	0:70,1:77,5:91	.:GG-WUR-108_GG-WUR-262_GG-WUR-068_GG-WUR-154_GG-WUR-042_GG-WUR-114_GG-WUR-121_GG-WUR-156_GG-WUR-059_GG-WUR-253_GG-WUR-116_GG-WUR-261_GG-WUR-257_GG-WUR-113_GG-WUR-120_GG-WUR-117_GG-WUR-159_GG-WUR-258_GG-WUR-036_GG-WUR-162_GG-WUR-256_GG-WUR-239_GG-WUR-051_GG-WUR-092_GG-WUR-069_GG-WUR-115_GG-WUR-130_GG-WUR-238_GG-WUR-236_GG-WUR-123_GG-WUR-055_GG-WUR-263_GG-WUR-175_GG-WUR-050_GG-WUR-153_GG-WUR-118_G…	370	59|3|4	missense_variant	MODERATE	HHAT	ENSGALG00000009881	ENSGALT00000016064	12/12	-	1578	1496	499	L/S	tTg/tCg	-	deleterious_low_confidence(0.01)	0.624	PTHR13285&PTHR13285:SF20	integral component of membrane [GO:0016021]; palmitoyltransferase activity [GO:0016409]; positive regulation of protein targeting to mitochondrion [GO:1903955]; protein palmitoylation [GO:0018345]; smoothened signaling pathway [GO:0007224]	embryo,nervous system,skeleton,reproductive,craniofacial,endocrine/exocrine,limbs/digits/tail,respiratory,vision/eye,mortality/aging,cardiovascular,growth/size/body,homeostasis,digestive/alimentary	YES
3	25960127	G	C	61740.9	181	362	362	1	362	0	WA_WD_W1	0:54,0:53,0:74	.:GG-WUR-108_GG-WUR-262_GG-WUR-154_GG-WUR-114_GG-WUR-121_GG-WUR-156_GG-WUR-059_GG-WUR-116_GG-WUR-261_GG-WUR-257_GG-WUR-113_GG-WUR-117_GG-WUR-159_GG-WUR-258_GG-WUR-036_GG-WUR-162_GG-WUR-239_GG-WUR-092_GG-WUR-163_GG-WUR-069_GG-WUR-130_GG-WUR-238_GG-WUR-236_GG-WUR-263_GG-WUR-175_GG-WUR-050_GG-WUR-153_GG-WUR-118_GG-WUR-259_GG-WUR-252_GG-WUR-111_GG-WUR-119_GG-WUR-122_GG-WUR-088_GG-WUR-147_GG-WUR-090_G…	4060	55|10|0	missense_variant	MODERATE	SIX2	ENSGALG00000023303	ENSGALT00000038337	1/2	-	291	229	77	P/A	Ccg/Gcg	-	tolerated(0.3)	-4.127	PTHR10390:SF29&PTHR10390&Pfam_domain:PF16878	cytoplasm [GO:0005737]; nuclear membrane [GO:0031965]; nucleoplasm [GO:0005654]; plasma membrane [GO:0005886]; RNA polymerase II core promoter proximal region sequence-specific DNA binding [GO:0000978]; transcriptional activator activity, RNA polymerase II core promoter proximal region sequence-specific binding [GO:0001077]; anterior/posterior axis specification [GO:0009948]; cell migration [GO:0…	mortality/aging,renal/urinary,no abnormal phenotype observed	NO
3	26293632	A	G	119338	246	487	492	0.989837	482	5	WA_WD_W1	5:63,0:78,0:100	GG-WUR-162_GG-WUR-111_GG-WUR-251_GG-WUR-053_GG-WUR-112:GG-WUR-108_GG-WUR-262_GG-WUR-068_GG-WUR-154_GG-WUR-042_GG-WUR-114_GG-WUR-121_GG-WUR-156_GG-WUR-059_GG-WUR-116_GG-WUR-261_GG-WUR-257_GG-WUR-113_GG-WUR-120_GG-WUR-117_GG-WUR-159_GG-WUR-258_GG-WUR-036_GG-WUR-239_GG-WUR-051_GG-WUR-092_GG-WUR-163_GG-WUR-069_GG-WUR-115_GG-WUR-130_GG-WUR-238_GG-WUR-123_GG-WUR-055_GG-WUR-263_GG-WUR-175_GG-WUR-050_GG-…	801	21|0|0	missense_variant	MODERATE	-	ENSGALG00000034313	ENSGALT00000060709	2/2	-	464	464	155	N/S	aAt/aGt	-	deleterious_low_confidence(0.05)	-0.128	-	-	-	YES
3	26677701	A	C	146612	236	472	472	1	472	0	WA_WD_W1	0:66,0:75,0:95	.:GG-WUR-108_GG-WUR-262_GG-WUR-068_GG-WUR-154_GG-WUR-042_GG-WUR-114_GG-WUR-121_GG-WUR-156_GG-WUR-059_GG-WUR-116_GG-WUR-261_GG-WUR-113_GG-WUR-120_GG-WUR-117_GG-WUR-159_GG-WUR-258_GG-WUR-162_GG-WUR-256_GG-WUR-239_GG-WUR-051_GG-WUR-092_GG-WUR-163_GG-WUR-069_GG-WUR-115_GG-WUR-130_GG-WUR-238_GG-WUR-236_GG-WUR-123_GG-WUR-055_GG-WUR-263_GG-WUR-175_GG-WUR-050_GG-WUR-153_GG-WUR-118_GG-WUR-259_GG-WUR-252_G…	516	57|9|2	missense_variant	MODERATE	EPAS1	ENSGALG00000010005	ENSGALT00000067885	1/15	-	112	112	38	T/P	Act/Cct	-	deleterious_low_confidence(0)	-1.366	PTHR23043&PTHR23043:SF8	cytoplasm [GO:0005737]; nucleus [GO:0005634]; transcription factor complex [GO:0005667]; transcription factor activity, sequence-specific DNA binding [GO:0003700]; transcription, DNA-templated [GO:0006351]cytoplasm [GO:0005737]; nucleus [GO:0005634]; transcription factor complex [GO:0005667]; RNA polymerase II transcription factor activity, sequence-specific DNA binding [GO:0000981]; positive reg…	embryo,respiratory,growth/size/body,liver/biliary,immune,vision/eye,hematopoietic,mortality/aging,pigmentation,homeostasis,cardiovascular	YES
3	28654953	G	C	107348	248	487	496	0.981855	478	9	WA_WD_W1	0:71,0:77,9:91	.:GG-WUR-108_GG-WUR-262_GG-WUR-068_GG-WUR-154_GG-WUR-042_GG-WUR-114_GG-WUR-121_GG-WUR-156_GG-WUR-059_GG-WUR-253_GG-WUR-116_GG-WUR-261_GG-WUR-257_GG-WUR-113_GG-WUR-120_GG-WUR-117_GG-WUR-159_GG-WUR-258_GG-WUR-036_GG-WUR-162_GG-WUR-256_GG-WUR-239_GG-WUR-051_GG-WUR-092_GG-WUR-163_GG-WUR-069_GG-WUR-115_GG-WUR-130_GG-WUR-238_GG-WUR-236_GG-WUR-123_GG-WUR-055_GG-WUR-263_GG-WUR-175_GG-WUR-050_GG-WUR-153_G…	-82	0|0|0	splice_acceptor_variant&non_coding_transcript_variant	HIGH	-	ENSGALG00000029553	ENSGALT00000049119	-	3/6	-	-	-	-	-	-	-	NA	-		-	YES
3	29590115	T	A	92941.8	233	455	466	0.976395	446	9	WA_WD_W1	1:61,8:67,0:95	GG-WUR-115:GG-WUR-108_GG-WUR-068_GG-WUR-154_GG-WUR-042_GG-WUR-114_GG-WUR-121_GG-WUR-156_GG-WUR-059_GG-WUR-116_GG-WUR-113_GG-WUR-120_GG-WUR-117_GG-WUR-159_GG-WUR-036_GG-WUR-162_GG-WUR-256_GG-WUR-239_GG-WUR-051_GG-WUR-092_GG-WUR-163_GG-WUR-069_GG-WUR-130_GG-WUR-238_GG-WUR-236_GG-WUR-123_GG-WUR-055_GG-WUR-263_GG-WUR-175_GG-WUR-153_GG-WUR-118_GG-WUR-252_GG-WUR-111_GG-WUR-134_GG-WUR-119_GG-WUR-122_GG-…	30020	54|25|0	missense_variant	MODERATE	GLO1	ENSGALG00000010127	ENSGALT00000016469	6/6	-	551	527	176	M/K	aTg/aAg	-	-	-2.789	3.10.180.10&PTHR10374&PTHR10374:SF8&TIGRFAM_domain:TIGR00068	extracellular exosome [GO:0070062]; lactoylglutathione lyase activity [GO:0004462]; zinc ion binding [GO:0008270]; negative regulation of apoptotic process [GO:0043066]; osteoclast differentiation [GO:0030316]; regulation of transcription from RNA polymerase II promoter [GO:0006357]	homeostasis	YES
3	31138509	ACGAGGAGGTCATGATC	ACGAGGAGGTCATGATCGAGGAGGTCATGATC	53621.6	175	340	350	0.971429	334	6	WA_WD_W1	2:54,1:49,3:64	GG-WUR-239_GG-WUR-118:GG-WUR-262_GG-WUR-068_GG-WUR-154_GG-WUR-042_GG-WUR-156_GG-WUR-253_GG-WUR-116_GG-WUR-261_GG-WUR-257_GG-WUR-113_GG-WUR-120_GG-WUR-117_GG-WUR-159_GG-WUR-258_GG-WUR-162_GG-WUR-256_GG-WUR-051_GG-WUR-092_GG-WUR-163_GG-WUR-069_GG-WUR-238_GG-WUR-236_GG-WUR-123_GG-WUR-055_GG-WUR-263_GG-WUR-175_GG-WUR-050_GG-WUR-259_GG-WUR-252_GG-WUR-111_GG-WUR-254_GG-WUR-134_GG-WUR-119_GG-WUR-088_GG-…	6669	58|9|0	inframe_insertion	MODERATE	FAM98A	ENSGALG00000010428	ENSGALT00000016982	9/9	-	1203-1218	1129-1144	377-382	RGGHDQ/RGGHDRGGHDQ	CGAGGAGGTCATGATCaa/CGAGGAGGTCATGATCGAGGAGGTCATGATCaa	-	-	-0.622	Low_complexity_(Seg):seg	tRNA-splicing ligase complex [GO:0072669]; poly(A) RNA binding [GO:0044822]	-	NO
3	33981457	CC	CCTTC	85586.7	239	461	478	0.964435	444	17	WA_WD_W1	1:67,7:68,9:87	GG-WUR-069:GG-WUR-108_GG-WUR-262_GG-WUR-068_GG-WUR-154_GG-WUR-042_GG-WUR-114_GG-WUR-121_GG-WUR-156_GG-WUR-059_GG-WUR-253_GG-WUR-116_GG-WUR-261_GG-WUR-257_GG-WUR-113_GG-WUR-120_GG-WUR-117_GG-WUR-159_GG-WUR-258_GG-WUR-036_GG-WUR-162_GG-WUR-256_GG-WUR-239_GG-WUR-051_GG-WUR-092_GG-WUR-163_GG-WUR-115_GG-WUR-130_GG-WUR-238_GG-WUR-236_GG-WUR-123_GG-WUR-055_GG-WUR-263_GG-WUR-175_GG-WUR-050_GG-WUR-153_GG-…	2096	54|17|0	inframe_insertion	MODERATE	-	ENSGALG00000010649	ENSGALT00000017325	1/3	-	87	87	29	Q/QK	caG/caGAAG	-	-	1	PTHR28581	integral component of membrane [GO:0016021]; plasma membrane [GO:0005886]; protein complex [GO:0043234]; trans-Golgi network [GO:0005802]; transport vesicle [GO:0030133]; negative regulation of phosphatase activity [GO:0010923]; positive regulation of Golgi to plasma membrane protein transport [GO:0042998]	-	NO
3	34909557	T	A	122873	243	486	486	1	486	0	WA_WD_W1	0:66,0:78,0:99	.:GG-WUR-108_GG-WUR-262_GG-WUR-068_GG-WUR-154_GG-WUR-042_GG-WUR-114_GG-WUR-121_GG-WUR-156_GG-WUR-059_GG-WUR-116_GG-WUR-257_GG-WUR-113_GG-WUR-120_GG-WUR-117_GG-WUR-159_GG-WUR-258_GG-WUR-036_GG-WUR-162_GG-WUR-256_GG-WUR-051_GG-WUR-092_GG-WUR-163_GG-WUR-069_GG-WUR-115_GG-WUR-130_GG-WUR-238_GG-WUR-236_GG-WUR-123_GG-WUR-055_GG-WUR-175_GG-WUR-050_GG-WUR-153_GG-WUR-118_GG-WUR-259_GG-WUR-111_GG-WUR-254_G…	588	42|0|0	missense_variant	MODERATE	-	ENSGALG00000020032	ENSGALT00000031873	4/4	-	439	439	147	T/S	Act/Tct	-	deleterious_low_confidence(0)	-0.168	PTHR31763	-	-	YES
3	35855441	T	A	100198	243	486	486	1	486	0	WA_WD_W1	0:67,0:77,0:99	.:GG-WUR-108_GG-WUR-262_GG-WUR-068_GG-WUR-154_GG-WUR-042_GG-WUR-114_GG-WUR-121_GG-WUR-156_GG-WUR-059_GG-WUR-253_GG-WUR-116_GG-WUR-261_GG-WUR-257_GG-WUR-113_GG-WUR-120_GG-WUR-117_GG-WUR-159_GG-WUR-036_GG-WUR-162_GG-WUR-256_GG-WUR-239_GG-WUR-051_GG-WUR-092_GG-WUR-163_GG-WUR-069_GG-WUR-115_GG-WUR-130_GG-WUR-238_GG-WUR-123_GG-WUR-055_GG-WUR-263_GG-WUR-175_GG-WUR-050_GG-WUR-153_GG-WUR-118_GG-WUR-259_G…	491	0|0|0	missense_variant	MODERATE	-	ENSGALG00000030930	ENSGALT00000067639	1/1	-	10	10	4	F/I	Ttc/Atc	-	deleterious_low_confidence(0.03)	-0.811	Low_complexity_(Seg):seg&Cleavage_site_(Signalp):SignalP-noTM	-	-	YES
3	36304976	G	A	88955.7	245	489	490	0.997959	488	1	WA_WD_W1	0:70,0:76,1:98	.:GG-WUR-108_GG-WUR-068_GG-WUR-154_GG-WUR-042_GG-WUR-114_GG-WUR-121_GG-WUR-156_GG-WUR-059_GG-WUR-253_GG-WUR-116_GG-WUR-261_GG-WUR-257_GG-WUR-113_GG-WUR-120_GG-WUR-117_GG-WUR-159_GG-WUR-258_GG-WUR-036_GG-WUR-162_GG-WUR-256_GG-WUR-239_GG-WUR-051_GG-WUR-092_GG-WUR-163_GG-WUR-069_GG-WUR-115_GG-WUR-130_GG-WUR-238_GG-WUR-236_GG-WUR-123_GG-WUR-055_GG-WUR-263_GG-WUR-175_GG-WUR-050_GG-WUR-153_GG-WUR-118_G…	361	50|8|0	splice_donor_variant&non_coding_transcript_variant	HIGH	-	ENSGALG00000010773	ENSGALT00000017520	-	1/1	-	-	-	-	-	-	-	NA	-	-	-	YES
3	38121613	AGA	GGA	112321	240	480	480	1	480	0	WA_WD_W1	0:65,0:77,0:98	.:GG-WUR-108_GG-WUR-262_GG-WUR-068_GG-WUR-154_GG-WUR-042_GG-WUR-114_GG-WUR-121_GG-WUR-156_GG-WUR-059_GG-WUR-253_GG-WUR-116_GG-WUR-261_GG-WUR-257_GG-WUR-113_GG-WUR-120_GG-WUR-117_GG-WUR-159_GG-WUR-036_GG-WUR-256_GG-WUR-239_GG-WUR-051_GG-WUR-092_GG-WUR-163_GG-WUR-069_GG-WUR-115_GG-WUR-130_GG-WUR-238_GG-WUR-236_GG-WUR-123_GG-WUR-175_GG-WUR-050_GG-WUR-153_GG-WUR-118_GG-WUR-259_GG-WUR-111_GG-WUR-254_G…	1641	64|7|0	missense_variant	MODERATE	LYST	ENSGALG00000032840	ENSGALT00000058745	27/52	-	7766-7768	7674-7676	2558-2559	RD/RG	agAGAt/agGGGt	-	-	-5.936	PTHR13743&PTHR13743:SF86	lysosome organization [GO:0007040]lysosome organization [GO:0007040]	nervous system,cellular,hearing/vestibular/ear,respiratory,craniofacial,limbs/digits/tail,immune,renal/urinary,neoplasm,vision/eye,homeostasis,behavior,integument,pigmentation,growth/size/body,hematopoietic	YES
3	42314206	AA	ACA	100139	235	458	470	0.974468	446	12	WA_WD_W1	0:61,0:76,12:86	.:GG-WUR-108_GG-WUR-068_GG-WUR-154_GG-WUR-042_GG-WUR-114_GG-WUR-121_GG-WUR-156_GG-WUR-059_GG-WUR-116_GG-WUR-261_GG-WUR-113_GG-WUR-120_GG-WUR-117_GG-WUR-159_GG-WUR-258_GG-WUR-036_GG-WUR-162_GG-WUR-256_GG-WUR-051_GG-WUR-092_GG-WUR-163_GG-WUR-069_GG-WUR-115_GG-WUR-130_GG-WUR-238_GG-WUR-236_GG-WUR-123_GG-WUR-175_GG-WUR-050_GG-WUR-153_GG-WUR-252_GG-WUR-111_GG-WUR-254_GG-WUR-134_GG-WUR-119_GG-WUR-122_G…	240	59|10|0	frameshift_variant	HIGH	AFDN	ENSGALG00000011329	ENSGALT00000018484	1/33	-	87	87	29	F/FX	ttT/ttTG	-	-	NA	-	cell-cell adherens junction [GO:0005913]; cell adhesion molecule binding [GO:0050839]; adherens junction organization [GO:0034332]; cell adhesion [GO:0007155]; regulation of protein localization [GO:0032880]; signal transduction [GO:0007165]signal transduction [GO:0007165]signal transduction [GO:0007165]signal transduction [GO:0007165]signal transduction [GO:0007165]	embryo,growth/size/body,cellular,mortality/aging,nervous system,cardiovascular	YES
3	42634760	C	G	101509	236	472	472	1	472	0	WA_WD_W1	0:65,0:76,0:95	.:GG-WUR-108_GG-WUR-068_GG-WUR-154_GG-WUR-042_GG-WUR-114_GG-WUR-121_GG-WUR-156_GG-WUR-059_GG-WUR-253_GG-WUR-116_GG-WUR-261_GG-WUR-257_GG-WUR-113_GG-WUR-120_GG-WUR-117_GG-WUR-159_GG-WUR-258_GG-WUR-036_GG-WUR-162_GG-WUR-256_GG-WUR-239_GG-WUR-051_GG-WUR-092_GG-WUR-163_GG-WUR-069_GG-WUR-115_GG-WUR-130_GG-WUR-238_GG-WUR-123_GG-WUR-055_GG-WUR-175_GG-WUR-050_GG-WUR-153_GG-WUR-259_GG-WUR-111_GG-WUR-254_G…	647	57|7|0	missense_variant	MODERATE	FGFR1OP	ENSGALG00000011423	ENSGALT00000018633	6/12	-	433	424	142	A/P	Gcc/Ccc	-	deleterious(0.03)	-2.369	PTHR15431	centrosome [GO:0005813]; nucleus [GO:0005634]; perinuclear region of cytoplasm [GO:0048471]; protein tyrosine kinase inhibitor activity [GO:0030292]; microtubule anchoring [GO:0034453]; positive regulation of cell growth [GO:0030307]; positive regulation of cell migration [GO:0030335]; positive regulation of cell proliferation [GO:0008284]	immune,vision/eye,hematopoietic,mortality/aging,homeostasis,cardiovascular	YES
3	52365437	G	C	68519.9	219	437	438	0.997717	436	1	WA_WD_W1	0:60,0:68,1:90	.:GG-WUR-108_GG-WUR-262_GG-WUR-154_GG-WUR-042_GG-WUR-114_GG-WUR-121_GG-WUR-156_GG-WUR-059_GG-WUR-253_GG-WUR-261_GG-WUR-257_GG-WUR-113_GG-WUR-120_GG-WUR-159_GG-WUR-258_GG-WUR-036_GG-WUR-162_GG-WUR-239_GG-WUR-051_GG-WUR-092_GG-WUR-163_GG-WUR-069_GG-WUR-130_GG-WUR-238_GG-WUR-123_GG-WUR-055_GG-WUR-175_GG-WUR-050_GG-WUR-153_GG-WUR-118_GG-WUR-259_GG-WUR-111_GG-WUR-254_GG-WUR-134_GG-WUR-119_GG-WUR-122_G…	6328	60|5|2	missense_variant	MODERATE	TAGAP	ENSGALG00000013747	ENSGALT00000022338	1/10	-	4	4	2	V/L	Gtg/Ctg	-	deleterious_low_confidence(0.03)	-0.323	-	defense response to virus [GO:0051607]; signal transduction [GO:0007165]	-	YES
3	53152133	ATCCAATAATTTTTTTCC	ACCCAAGAATTTTTTTCC	80133.3	219	438	438	1	438	0	WA_WD_W1	0:58,0:72,0:89	.:GG-WUR-108_GG-WUR-068_GG-WUR-154_GG-WUR-042_GG-WUR-121_GG-WUR-156_GG-WUR-059_GG-WUR-253_GG-WUR-116_GG-WUR-261_GG-WUR-113_GG-WUR-120_GG-WUR-117_GG-WUR-159_GG-WUR-036_GG-WUR-162_GG-WUR-239_GG-WUR-051_GG-WUR-092_GG-WUR-069_GG-WUR-115_GG-WUR-130_GG-WUR-238_GG-WUR-123_GG-WUR-055_GG-WUR-263_GG-WUR-175_GG-WUR-050_GG-WUR-153_GG-WUR-118_GG-WUR-111_GG-WUR-254_GG-WUR-134_GG-WUR-119_GG-WUR-122_GG-WUR-088_G…	-46	0|0|0	splice_donor_variant&non_coding_transcript_exon_variant&non_coding_transcript_variant	HIGH	-	ENSGALG00000030501	ENSGALT00000074529	2/3	2/2	123-?	-	-	-	-	-	-	NA	-		-	NO
3	54189026	G	A	137514	246	492	492	1	492	0	WA_WD_W1	0:69,0:78,0:99	.:GG-WUR-108_GG-WUR-262_GG-WUR-068_GG-WUR-154_GG-WUR-042_GG-WUR-114_GG-WUR-121_GG-WUR-156_GG-WUR-059_GG-WUR-253_GG-WUR-116_GG-WUR-261_GG-WUR-257_GG-WUR-120_GG-WUR-117_GG-WUR-159_GG-WUR-258_GG-WUR-036_GG-WUR-162_GG-WUR-256_GG-WUR-239_GG-WUR-051_GG-WUR-092_GG-WUR-163_GG-WUR-069_GG-WUR-115_GG-WUR-130_GG-WUR-236_GG-WUR-123_GG-WUR-055_GG-WUR-263_GG-WUR-175_GG-WUR-050_GG-WUR-153_GG-WUR-118_GG-WUR-259_G…	1975	52|21|0	missense_variant	MODERATE	TXLNB	ENSGALG00000013822	ENSGALT00000022430	10/10	-	1618	1423	475	D/N	Gac/Aac	-	deleterious(0.02)	-0.591	PTHR16127:SF10&PTHR16127	cytoplasm [GO:0005737]; extracellular space [GO:0005615]; sarcomere [GO:0030017]; positive regulation of neuron projection development [GO:0010976]	-	YES
3	63975122	T	G	101443	241	460	482	0.954357	440	20	WA_WD_W1	1:66,18:58,1:96	GG-WUR-163:GG-WUR-108_GG-WUR-068_GG-WUR-154_GG-WUR-042_GG-WUR-114_GG-WUR-121_GG-WUR-156_GG-WUR-059_GG-WUR-253_GG-WUR-116_GG-WUR-261_GG-WUR-113_GG-WUR-120_GG-WUR-117_GG-WUR-159_GG-WUR-036_GG-WUR-162_GG-WUR-256_GG-WUR-239_GG-WUR-051_GG-WUR-092_GG-WUR-069_GG-WUR-115_GG-WUR-130_GG-WUR-238_GG-WUR-236_GG-WUR-123_GG-WUR-055_GG-WUR-263_GG-WUR-175_GG-WUR-050_GG-WUR-153_GG-WUR-118_GG-WUR-259_GG-WUR-252_GG-…	1031	58|26|0	missense_variant	MODERATE	RWDD1	ENSGALG00000014953	ENSGALT00000051418	4/4	-	286	286	96	S/R	Agt/Cgt	-	deleterious_low_confidence(0.01)	-0.293	PROSITE_profiles:PS50908&SMART_domains:SM00591	polysome [GO:0005844]; cytoplasmic translation [GO:0002181]	immune,hematopoietic	YES
3	77769959	TGT	CCT	109933	239	478	478	1	478	0	WA_WD_W1	0:64,0:77,0:98	.:GG-WUR-262_GG-WUR-068_GG-WUR-154_GG-WUR-042_GG-WUR-121_GG-WUR-156_GG-WUR-059_GG-WUR-116_GG-WUR-261_GG-WUR-257_GG-WUR-113_GG-WUR-120_GG-WUR-117_GG-WUR-159_GG-WUR-258_GG-WUR-036_GG-WUR-162_GG-WUR-239_GG-WUR-051_GG-WUR-092_GG-WUR-163_GG-WUR-069_GG-WUR-115_GG-WUR-130_GG-WUR-238_GG-WUR-123_GG-WUR-055_GG-WUR-263_GG-WUR-175_GG-WUR-050_GG-WUR-153_GG-WUR-118_GG-WUR-252_GG-WUR-111_GG-WUR-134_GG-WUR-119_G…	1817	59|9|0	missense_variant	MODERATE	CEP162	ENSGALG00000015836	ENSGALT00000025536	15/26	-	2945-2947	2038-2040	680	C/P	TGT/CCT	-	deleterious(0.01)	-0.525	PTHR34031	axonemal microtubule [GO:0005879]; centriole [GO:0005814]; nucleoplasm [GO:0005654]; cilium assembly [GO:0060271]	-	YES
3	77774139	A	G	92294	233	465	466	0.997854	464	1	WA_WD_W1	1:66,0:70,0:96	GG-WUR-252:GG-WUR-108_GG-WUR-068_GG-WUR-154_GG-WUR-042_GG-WUR-114_GG-WUR-121_GG-WUR-156_GG-WUR-059_GG-WUR-253_GG-WUR-116_GG-WUR-261_GG-WUR-257_GG-WUR-113_GG-WUR-120_GG-WUR-159_GG-WUR-258_GG-WUR-036_GG-WUR-162_GG-WUR-256_GG-WUR-239_GG-WUR-051_GG-WUR-092_GG-WUR-069_GG-WUR-115_GG-WUR-130_GG-WUR-238_GG-WUR-236_GG-WUR-123_GG-WUR-055_GG-WUR-263_GG-WUR-175_GG-WUR-050_GG-WUR-153_GG-WUR-118_GG-WUR-259_GG-…	952	59|9|0	missense_variant	MODERATE	CEP162	ENSGALG00000015836	ENSGALT00000025536	19/26	-	3510	2603	868	E/G	gAa/gGa	-	tolerated(0.05)	-5.779	PTHR34031&Coiled-coils_(Ncoils):Coil	axonemal microtubule [GO:0005879]; centriole [GO:0005814]; nucleoplasm [GO:0005654]; cilium assembly [GO:0060271]	-	YES
3	79880235	TTTTTTTCTTTTTTCA	TTTTTTTCTTTTTTCTTTTTTCA	59798.9	197	394	394	1	394	0	WA_WD_W1	0:49,0:65,0:83	.:GG-WUR-262_GG-WUR-068_GG-WUR-154_GG-WUR-042_GG-WUR-114_GG-WUR-121_GG-WUR-156_GG-WUR-253_GG-WUR-116_GG-WUR-261_GG-WUR-257_GG-WUR-120_GG-WUR-159_GG-WUR-036_GG-WUR-162_GG-WUR-239_GG-WUR-051_GG-WUR-163_GG-WUR-069_GG-WUR-130_GG-WUR-123_GG-WUR-263_GG-WUR-050_GG-WUR-153_GG-WUR-118_GG-WUR-111_GG-WUR-134_GG-WUR-119_GG-WUR-122_GG-WUR-088_GG-WUR-147_GG-WUR-096_GG-WUR-136_GG-WUR-240_GG-WUR-160_GG-WUR-135_G…	392	55|20|2	splice_acceptor_variant	HIGH	PHIP	ENSGALG00000015889	ENSGALT00000025610	-	36/39	-	-	-	-	-	-	-	NA	-	insulin receptor signaling pathway [GO:0008286]extracellular exosome [GO:0070062]; nucleus [GO:0005634]; cytoskeleton organization [GO:0007010]; insulin receptor signaling pathway [GO:0008286]; negative regulation of extrinsic apoptotic signaling pathway [GO:2001237]; positive regulation of transcription from RNA polymerase II promoter [GO:0045944]; regulation of cell shape [GO:0008360]; regulati…	respiratory,growth/size/body,adipose,liver/biliary,cellular,mortality/aging,muscle,homeostasis,cardiovascular	NO
3	104585550	TAATT	CAATT	109102	244	488	488	1	488	0	WA_WD_W1	0:68,0:77,0:99	.:GG-WUR-108_GG-WUR-262_GG-WUR-068_GG-WUR-154_GG-WUR-042_GG-WUR-114_GG-WUR-121_GG-WUR-156_GG-WUR-059_GG-WUR-253_GG-WUR-116_GG-WUR-261_GG-WUR-257_GG-WUR-113_GG-WUR-120_GG-WUR-117_GG-WUR-159_GG-WUR-036_GG-WUR-162_GG-WUR-256_GG-WUR-239_GG-WUR-051_GG-WUR-092_GG-WUR-163_GG-WUR-069_GG-WUR-115_GG-WUR-130_GG-WUR-236_GG-WUR-123_GG-WUR-055_GG-WUR-263_GG-WUR-175_GG-WUR-050_GG-WUR-153_GG-WUR-118_GG-WUR-259_G…	542	45|17|0	missense_variant	MODERATE	WDCP	ENSGALG00000019867	ENSGALT00000031579	3/5	-	1416-1420	1184-1188	395-396	KL/TL	aAATTA/aCATTG	-	-	-5.339	Pfam_domain:PF15390&PTHR14897&PTHR14897:SF3	protein oligomerization [GO:0051259]	-	YES
3	105015544	C	G	105925	219	405	438	0.924658	376	29	WA_WD_W1	0:56,29:42,0:90	.:GG-WUR-108_GG-WUR-068_GG-WUR-154_GG-WUR-042_GG-WUR-114_GG-WUR-121_GG-WUR-156_GG-WUR-059_GG-WUR-116_GG-WUR-113_GG-WUR-120_GG-WUR-117_GG-WUR-159_GG-WUR-036_GG-WUR-239_GG-WUR-051_GG-WUR-092_GG-WUR-163_GG-WUR-069_GG-WUR-115_GG-WUR-130_GG-WUR-236_GG-WUR-123_GG-WUR-055_GG-WUR-175_GG-WUR-050_GG-WUR-153_GG-WUR-118_GG-WUR-111_GG-WUR-134_GG-WUR-119_GG-WUR-122_GG-WUR-088_GG-WUR-147_GG-WUR-090_GG-WUR-096_G…	313	60|6|0	missense_variant	MODERATE	GTF3C2	ENSGALG00000031281	ENSGALT00000052697	10/17	-	2130	2130	710	Q/H	caG/caC	-	deleterious(0.03)	-3.738	2.130.10.10&PTHR15052&PTHR15052:SF2&SMART_domains:SM00320	-	-	YES
4	596236	CGAGGAGGAGGAGGAGGAGG	CGAGGAGGAGG	87637	228	428	456	0.938596	410	18	WA_WD_W1	0:60,18:53,0:92	.:GG-WUR-108_GG-WUR-068_GG-WUR-154_GG-WUR-042_GG-WUR-114_GG-WUR-121_GG-WUR-156_GG-WUR-059_GG-WUR-116_GG-WUR-261_GG-WUR-113_GG-WUR-120_GG-WUR-117_GG-WUR-159_GG-WUR-258_GG-WUR-036_GG-WUR-162_GG-WUR-239_GG-WUR-051_GG-WUR-092_GG-WUR-163_GG-WUR-069_GG-WUR-115_GG-WUR-130_GG-WUR-238_GG-WUR-236_GG-WUR-123_GG-WUR-055_GG-WUR-175_GG-WUR-050_GG-WUR-153_GG-WUR-118_GG-WUR-111_GG-WUR-134_GG-WUR-119_GG-WUR-122_G…	1530	49|6|0	inframe_deletion	MODERATE	STARD8	ENSGALG00000032419	ENSGALT00000076851	5/14	-	2353-2371	2353-2371	785-791	EEEEEEE/EEEE	GAGGAGGAGGAGGAGGAGGaa/GAGGAGGAGGaa	-	-	0.944	PTHR12659&PTHR12659:SF3&Low_complexity_(Seg):seg	lipid binding [GO:0008289]; signal transduction [GO:0007165]lipid binding [GO:0008289]; signal transduction [GO:0007165]	-	NO
4	1632900	ACTTCTTC	ACTTC	125138	224	430	448	0.959821	412	18	WA_WD_W1	4:51,5:72,9:83	GG-WUR-121_GG-WUR-055_GG-WUR-053_GG-WUR-237:GG-WUR-108_GG-WUR-068_GG-WUR-154_GG-WUR-042_GG-WUR-156_GG-WUR-059_GG-WUR-116_GG-WUR-113_GG-WUR-120_GG-WUR-117_GG-WUR-159_GG-WUR-036_GG-WUR-162_GG-WUR-239_GG-WUR-051_GG-WUR-092_GG-WUR-163_GG-WUR-069_GG-WUR-115_GG-WUR-130_GG-WUR-123_GG-WUR-175_GG-WUR-050_GG-WUR-153_GG-WUR-118_GG-WUR-111_GG-WUR-134_GG-WUR-119_GG-WUR-122_GG-WUR-088_GG-WUR-147_GG-WUR-090_GG-…	1228	52|29|0	inframe_deletion	MODERATE	-	ENSGALG00000024039	ENSGALT00000040562	11/11	-	1426-1432	1426-1432	476-478	EEV/EV	GAAGAAGtt/GAAGtt	-	-	-2.034	Pfam_domain:PF04615	nucleolus [GO:0005730]; small-subunit processome [GO:0032040]; maturation of SSU-rRNA [GO:0030490]	-	NO
4	2027165	ATCTTCA	ATCTTCTCTTCA	80241.4	236	472	472	1	472	0	WA_WD_W1	0:68,0:74,0:94	.:GG-WUR-108_GG-WUR-262_GG-WUR-068_GG-WUR-154_GG-WUR-042_GG-WUR-114_GG-WUR-121_GG-WUR-156_GG-WUR-059_GG-WUR-253_GG-WUR-116_GG-WUR-261_GG-WUR-257_GG-WUR-113_GG-WUR-120_GG-WUR-117_GG-WUR-159_GG-WUR-258_GG-WUR-036_GG-WUR-162_GG-WUR-256_GG-WUR-239_GG-WUR-051_GG-WUR-092_GG-WUR-163_GG-WUR-069_GG-WUR-115_GG-WUR-130_GG-WUR-238_GG-WUR-123_GG-WUR-055_GG-WUR-263_GG-WUR-175_GG-WUR-050_GG-WUR-153_GG-WUR-259_G…	51	52|20|9	splice_acceptor_variant	HIGH	GLRA4	ENSGALG00000004936	ENSGALT00000007899	-	5/8	-	-	-	-	-	-	-	NA	-	cell junction [GO:0030054]; integral component of plasma membrane [GO:0005887]; synapse [GO:0045202]; extracellular-glycine-gated chloride channel activity [GO:0016934]; glycine binding [GO:0016594]; transmitter-gated ion channel activity [GO:0022824]; neuropeptide signaling pathway [GO:0007218]; response to amino acid [GO:0043200]; synaptic transmission, glycinergic [GO:0060012]	-	NO
4	2550124	T	C	109438	248	496	496	1	496	0	WA_WD_W1	0:70,0:78,0:100	.:GG-WUR-108_GG-WUR-068_GG-WUR-154_GG-WUR-042_GG-WUR-114_GG-WUR-121_GG-WUR-156_GG-WUR-059_GG-WUR-253_GG-WUR-116_GG-WUR-261_GG-WUR-257_GG-WUR-113_GG-WUR-120_GG-WUR-117_GG-WUR-159_GG-WUR-258_GG-WUR-036_GG-WUR-162_GG-WUR-256_GG-WUR-239_GG-WUR-051_GG-WUR-092_GG-WUR-163_GG-WUR-069_GG-WUR-115_GG-WUR-130_GG-WUR-238_GG-WUR-236_GG-WUR-123_GG-WUR-055_GG-WUR-263_GG-WUR-175_GG-WUR-050_GG-WUR-153_GG-WUR-118_G…	139	58|2|0	splice_acceptor_variant	HIGH	GDPD2	ENSGALG00000005842	ENSGALT00000054239	-	4/9	-	-	-	-	-	-	-	NA	-	integral component of membrane [GO:0016021]; glycerophosphodiester phosphodiesterase activity [GO:0008889]; lipid metabolic process [GO:0006629]	-	YES
4	3520685	ATATGGGGGGA	ATATGGGGGGGA	100809	248	496	496	1	496	0	WA_WD_W1	0:71,0:77,0:100	.:GG-WUR-108_GG-WUR-262_GG-WUR-068_GG-WUR-154_GG-WUR-042_GG-WUR-114_GG-WUR-121_GG-WUR-156_GG-WUR-059_GG-WUR-253_GG-WUR-116_GG-WUR-261_GG-WUR-257_GG-WUR-113_GG-WUR-120_GG-WUR-117_GG-WUR-159_GG-WUR-258_GG-WUR-036_GG-WUR-162_GG-WUR-256_GG-WUR-239_GG-WUR-051_GG-WUR-092_GG-WUR-163_GG-WUR-069_GG-WUR-115_GG-WUR-130_GG-WUR-238_GG-WUR-236_GG-WUR-123_GG-WUR-055_GG-WUR-263_GG-WUR-175_GG-WUR-050_GG-WUR-153_G…	401	62|3|4	frameshift_variant	HIGH	MBNL3	ENSGALG00000032045	ENSGALT00000061106	6/6	-	627-637	627-637	209-213	PPPIL/PPPHIX	ccTCCCCCCATATtg/ccTCCCCCCCATATtg	-	-	NA	-	metal ion binding [GO:0046872]metal ion binding [GO:0046872]metal ion binding [GO:0046872]metal ion binding [GO:0046872]metal ion binding [GO:0046872]metal ion binding [GO:0046872]metal ion binding [GO:0046872]metal ion binding [GO:0046872]	muscle,behavior	NO
4	5118063	AAAAAAGA	AAAAAAGAAAAAGA	79276.4	238	462	476	0.970588	448	14	WA_WD_W1	6:61,2:73,6:90	GG-WUR-114_GG-WUR-113_GG-WUR-055_GG-WUR-260_GG-WUR-155_GG-WUR-112:GG-WUR-108_GG-WUR-262_GG-WUR-154_GG-WUR-042_GG-WUR-121_GG-WUR-156_GG-WUR-059_GG-WUR-253_GG-WUR-116_GG-WUR-261_GG-WUR-257_GG-WUR-120_GG-WUR-117_GG-WUR-159_GG-WUR-258_GG-WUR-036_GG-WUR-162_GG-WUR-256_GG-WUR-239_GG-WUR-051_GG-WUR-092_GG-WUR-069_GG-WUR-115_GG-WUR-238_GG-WUR-236_GG-WUR-123_GG-WUR-263_GG-WUR-175_GG-WUR-050_GG-WUR-153_GG-…	2068	0|0|0	splice_acceptor_variant&non_coding_transcript_exon_variant&non_coding_transcript_variant	HIGH	-	ENSGALG00000039706	ENSGALT00000050461	2/2	-	18-24	-	-	-	-	-	-	NA	-		-	NO
4	9128764	C	T	110217	244	488	488	1	488	0	WA_WD_W1	0:71,0:77,0:96	.:GG-WUR-108_GG-WUR-262_GG-WUR-068_GG-WUR-154_GG-WUR-042_GG-WUR-114_GG-WUR-121_GG-WUR-156_GG-WUR-059_GG-WUR-253_GG-WUR-116_GG-WUR-261_GG-WUR-257_GG-WUR-113_GG-WUR-120_GG-WUR-117_GG-WUR-159_GG-WUR-258_GG-WUR-036_GG-WUR-162_GG-WUR-256_GG-WUR-239_GG-WUR-051_GG-WUR-092_GG-WUR-163_GG-WUR-069_GG-WUR-115_GG-WUR-130_GG-WUR-238_GG-WUR-236_GG-WUR-123_GG-WUR-055_GG-WUR-263_GG-WUR-175_GG-WUR-050_GG-WUR-153_G…	181	0|0|0	splice_donor_variant&non_coding_transcript_variant	HIGH	-	ENSGALG00000031333	ENSGALT00000055186	-	2/3	-	-	-	-	-	-	-	NA	-		-	YES
4	12231152	G	A	106003	237	473	474	0.99789	472	1	WA_WD_W1	0:68,1:73,0:95	.:GG-WUR-108_GG-WUR-262_GG-WUR-068_GG-WUR-154_GG-WUR-042_GG-WUR-114_GG-WUR-121_GG-WUR-156_GG-WUR-059_GG-WUR-253_GG-WUR-116_GG-WUR-261_GG-WUR-257_GG-WUR-113_GG-WUR-120_GG-WUR-117_GG-WUR-159_GG-WUR-258_GG-WUR-036_GG-WUR-162_GG-WUR-256_GG-WUR-239_GG-WUR-051_GG-WUR-092_GG-WUR-163_GG-WUR-069_GG-WUR-115_GG-WUR-130_GG-WUR-238_GG-WUR-236_GG-WUR-123_GG-WUR-055_GG-WUR-263_GG-WUR-175_GG-WUR-050_GG-WUR-153_G…	1923	20|2|0	missense_variant	MODERATE	-	ENSGALG00000007703	ENSGALT00000012483	5/9	-	1413	1337	446	P/L	cCa/cTa	-	tolerated(0.06)	-3.032	PTHR19964:SF41&PTHR19964	zinc ion binding [GO:0008270]	-	YES
4	14405407	C	A	95823.1	231	435	462	0.941558	408	27	WA_WD_W1	27:34,0:76,0:94	GG-WUR-114_GG-WUR-121_GG-WUR-156_GG-WUR-059_GG-WUR-120_GG-WUR-117_GG-WUR-159_GG-WUR-036_GG-WUR-163_GG-WUR-069_GG-WUR-236_GG-WUR-123_GG-WUR-055_GG-WUR-050_GG-WUR-153_GG-WUR-111_GG-WUR-122_GG-WUR-147_GG-WUR-136_GG-WUR-240_GG-WUR-164_GG-WUR-054_GG-WUR-097_GG-WUR-155_GG-WUR-143_GG-WUR-112_GG-WUR-237:GG-WUR-108_GG-WUR-068_GG-WUR-154_GG-WUR-042_GG-WUR-116_GG-WUR-261_GG-WUR-113_GG-WUR-162_GG-WUR-239_GG-…	-33	0|0|0	splice_donor_variant&non_coding_transcript_variant	HIGH	-	ENSGALG00000041125	ENSGALT00000049592	-	1/1	-	-	-	-	-	-	-	NA	-		-	YES
4	16528344	CAGA	CGGA	118706	239	461	478	0.964435	446	15	WA_WD_W1	0:62,0:78,15:83	.:GG-WUR-108_GG-WUR-068_GG-WUR-154_GG-WUR-042_GG-WUR-114_GG-WUR-121_GG-WUR-156_GG-WUR-059_GG-WUR-116_GG-WUR-261_GG-WUR-113_GG-WUR-120_GG-WUR-117_GG-WUR-159_GG-WUR-258_GG-WUR-036_GG-WUR-162_GG-WUR-239_GG-WUR-051_GG-WUR-092_GG-WUR-163_GG-WUR-069_GG-WUR-115_GG-WUR-130_GG-WUR-238_GG-WUR-236_GG-WUR-123_GG-WUR-055_GG-WUR-175_GG-WUR-050_GG-WUR-153_GG-WUR-118_GG-WUR-111_GG-WUR-134_GG-WUR-119_GG-WUR-122_G…	296	60|2|0	splice_acceptor_variant&coding_sequence_variant	HIGH	TMEM255A	ENSGALG00000008604	ENSGALT00000068582	5/9	4/8	?-387	?-387	?-129	-	-	-	-	NA	-	integral component of membrane [GO:0016021]	-	NO
4	16543551	GCTAACAC	GC	87564.6	246	486	492	0.987805	480	6	WA_WD_W1	0:70,0:77,6:93	.:GG-WUR-108_GG-WUR-262_GG-WUR-068_GG-WUR-154_GG-WUR-042_GG-WUR-114_GG-WUR-121_GG-WUR-156_GG-WUR-059_GG-WUR-253_GG-WUR-116_GG-WUR-261_GG-WUR-257_GG-WUR-113_GG-WUR-120_GG-WUR-117_GG-WUR-159_GG-WUR-258_GG-WUR-036_GG-WUR-162_GG-WUR-256_GG-WUR-239_GG-WUR-051_GG-WUR-092_GG-WUR-163_GG-WUR-069_GG-WUR-115_GG-WUR-130_GG-WUR-238_GG-WUR-236_GG-WUR-123_GG-WUR-055_GG-WUR-263_GG-WUR-175_GG-WUR-050_GG-WUR-153_G…	1953	55|8|0	inframe_deletion	MODERATE	ZBTB33	ENSGALG00000008611	ENSGALT00000014023	2/2	-	908-914	908-914	303-305	SVS/S	aGTGTTAGc/aGc	-	-	-1.752	PTHR19303&PTHR19303:SF235&Low_complexity_(Seg):seg	metal ion binding [GO:0046872]; nucleic acid binding [GO:0003676]cytoplasm [GO:0005737]; nucleolus [GO:0005730]; nucleoplasm [GO:0005654]; plasma membrane [GO:0005886]; metal ion binding [GO:0046872]; methyl-CpG binding [GO:0008327]; negative regulation of transcription, DNA-templated [GO:0045892]metal ion binding [GO:0046872]; nucleic acid binding [GO:0003676]	-	NO
4	16561311	A	G	143837	238	454	476	0.953781	434	20	WA_WD_W1	0:69,14:60,6:88	.:GG-WUR-108_GG-WUR-262_GG-WUR-068_GG-WUR-154_GG-WUR-042_GG-WUR-114_GG-WUR-121_GG-WUR-156_GG-WUR-059_GG-WUR-253_GG-WUR-116_GG-WUR-261_GG-WUR-257_GG-WUR-113_GG-WUR-120_GG-WUR-117_GG-WUR-159_GG-WUR-258_GG-WUR-036_GG-WUR-162_GG-WUR-256_GG-WUR-239_GG-WUR-051_GG-WUR-092_GG-WUR-069_GG-WUR-115_GG-WUR-130_GG-WUR-236_GG-WUR-123_GG-WUR-055_GG-WUR-263_GG-WUR-175_GG-WUR-050_GG-WUR-153_GG-WUR-118_GG-WUR-259_G…	404	55|14|0	missense_variant	MODERATE	UPF3B	ENSGALG00000008618	ENSGALT00000039073	3/10	-	269	269	90	Q/R	cAa/cGa	-	deleterious(0)	-1.721	PTHR13112:SF1&PTHR13112&Pfam_domain:PF03467&3.30.70.330&Superfamily_domains:SSF54928	cytoplasm [GO:0005737]; exon-exon junction complex [GO:0035145]; microtubule organizing center [GO:0005815]; nucleolus [GO:0005730]; mRNA binding [GO:0003729]; nucleotide binding [GO:0000166]; nuclear-transcribed mRNA catabolic process, nonsense-mediated decay [GO:0000184]; positive regulation of translation [GO:0045727]	-	YES
4	17363327	ACATT	GAATC	56615.7	191	382	382	1	382	0	WA_WD_W1	0:46,0:63,0:82	.:GG-WUR-108_GG-WUR-262_GG-WUR-068_GG-WUR-154_GG-WUR-042_GG-WUR-114_GG-WUR-121_GG-WUR-156_GG-WUR-059_GG-WUR-261_GG-WUR-113_GG-WUR-120_GG-WUR-117_GG-WUR-159_GG-WUR-036_GG-WUR-051_GG-WUR-092_GG-WUR-163_GG-WUR-115_GG-WUR-130_GG-WUR-123_GG-WUR-175_GG-WUR-050_GG-WUR-153_GG-WUR-118_GG-WUR-134_GG-WUR-119_GG-WUR-122_GG-WUR-088_GG-WUR-147_GG-WUR-096_GG-WUR-136_GG-WUR-160_GG-WUR-135_GG-WUR-164_GG-WUR-054_G…	1854	52|13|0	missense_variant	MODERATE	NRK	ENSGALG00000008970	ENSGALT00000014591	30/31	-	3657-3661	3558-3562	1186-1188	GHL/GNL	ggACATTtg/ggGAATCtg	-	-	-2.664	PROSITE_profiles:PS50219&PTHR24361:SF405&PTHR24361&Pfam_domain:PF00780&SMART_domains:SM00036	ATP binding [GO:0005524]; protein kinase activity [GO:0004672]ATP binding [GO:0005524]; protein kinase activity [GO:0004672]ATP binding [GO:0005524]; protein kinase activity [GO:0004672]cytoplasm [GO:0005737]; ATP binding [GO:0005524]; signal transducer, downstream of receptor, with serine/threonine kinase activity [GO:0004702]	embryo,mortality/aging,reproductive	NO
4	18327313	GA	GACTGTACA	76138.2	227	440	454	0.969163	426	14	WA_WD_W1	5:54,4:69,5:90	GG-WUR-068_GG-WUR-162_GG-WUR-111_GG-WUR-240_GG-WUR-237:GG-WUR-108_GG-WUR-154_GG-WUR-042_GG-WUR-114_GG-WUR-121_GG-WUR-156_GG-WUR-059_GG-WUR-116_GG-WUR-261_GG-WUR-113_GG-WUR-120_GG-WUR-117_GG-WUR-159_GG-WUR-036_GG-WUR-256_GG-WUR-163_GG-WUR-069_GG-WUR-115_GG-WUR-130_GG-WUR-238_GG-WUR-236_GG-WUR-123_GG-WUR-055_GG-WUR-175_GG-WUR-050_GG-WUR-153_GG-WUR-118_GG-WUR-254_GG-WUR-134_GG-WUR-119_GG-WUR-122_GG-…	368	51|21|0	frameshift_variant	HIGH	-	ENSGALG00000009168	ENSGALT00000069578	8/18	-	482	482	161	V/VYSX	gTc/gTGTACAGTc	-	-	NA	PTHR10528&PTHR10528:SF18&Pfam_domain:PF05110	nuclear speck [GO:0016607]; G-quadruplex RNA binding [GO:0002151]; learning or memory [GO:0007611]; negative regulation of gene expression [GO:0010629]; nuclear speck organization [GO:0035063]; regulation of RNA splicing [GO:0043484]	-	YES
4	21050876	GT	AT	85922.3	223	446	446	1	446	0	WA_WD_W1	0:56,0:76,0:91	.:GG-WUR-108_GG-WUR-068_GG-WUR-154_GG-WUR-042_GG-WUR-121_GG-WUR-156_GG-WUR-059_GG-WUR-113_GG-WUR-120_GG-WUR-117_GG-WUR-159_GG-WUR-036_GG-WUR-162_GG-WUR-239_GG-WUR-051_GG-WUR-092_GG-WUR-163_GG-WUR-069_GG-WUR-130_GG-WUR-236_GG-WUR-123_GG-WUR-055_GG-WUR-175_GG-WUR-050_GG-WUR-153_GG-WUR-252_GG-WUR-111_GG-WUR-134_GG-WUR-119_GG-WUR-122_GG-WUR-088_GG-WUR-147_GG-WUR-090_GG-WUR-096_GG-WUR-136_GG-WUR-240_G…	422	63|10|0	splice_donor_variant	HIGH	TDO2	ENSGALG00000035207	ENSGALT00000050742	-	8/10	-	-	-	-	-	-	-	NA	-	heme binding [GO:0020037]; metal ion binding [GO:0046872]; tryptophan 2,3-dioxygenase activity [GO:0004833]; tryptophan catabolic process to kynurenine [GO:0019441]	homeostasis,nervous system,cellular,behavior	YES
4	23491714	CCTGCTGCTGCTGC	CCTGCTGCTGC	79760.9	234	468	468	1	468	0	WA_WD_W1	0:67,0:75,0:92	.:GG-WUR-108_GG-WUR-262_GG-WUR-068_GG-WUR-154_GG-WUR-042_GG-WUR-114_GG-WUR-121_GG-WUR-156_GG-WUR-059_GG-WUR-253_GG-WUR-116_GG-WUR-261_GG-WUR-257_GG-WUR-113_GG-WUR-120_GG-WUR-159_GG-WUR-258_GG-WUR-036_GG-WUR-162_GG-WUR-256_GG-WUR-239_GG-WUR-051_GG-WUR-092_GG-WUR-163_GG-WUR-069_GG-WUR-115_GG-WUR-238_GG-WUR-236_GG-WUR-123_GG-WUR-055_GG-WUR-263_GG-WUR-175_GG-WUR-050_GG-WUR-153_GG-WUR-118_GG-WUR-259_G…	274	63|0|0	inframe_deletion	MODERATE	NAF1	ENSGALG00000009496	ENSGALT00000038789	1/8	-	42-54	2021-09-01	2017-07-03	AQQQQ/AQQQ	gcGCAGCAGCAGCAG/gcGCAGCAGCAG	-	-	-0.355	-	nucleus [GO:0005634]; small nucleolar ribonucleoprotein complex [GO:0005732]; poly(A) RNA binding [GO:0044822]; telomerase RNA binding [GO:0070034]; positive regulation of telomerase RNA localization to Cajal body [GO:1904874]; pseudouridine synthesis [GO:0001522]; ribosome biogenesis [GO:0042254]	growth/size/body,endocrine/exocrine,liver/biliary,immune,renal/urinary,hematopoietic,cellular,mortality/aging,integument,digestive/alimentary,homeostasis,cardiovascular	NO
4	24073667	GG	GGTTTG	99727	244	477	488	0.977459	466	11	WA_WD_W1	4:63,4:73,3:97	GG-WUR-258_GG-WUR-175_GG-WUR-097_GG-WUR-155:GG-WUR-108_GG-WUR-068_GG-WUR-154_GG-WUR-042_GG-WUR-114_GG-WUR-121_GG-WUR-156_GG-WUR-059_GG-WUR-253_GG-WUR-116_GG-WUR-257_GG-WUR-113_GG-WUR-120_GG-WUR-117_GG-WUR-159_GG-WUR-036_GG-WUR-239_GG-WUR-051_GG-WUR-092_GG-WUR-163_GG-WUR-069_GG-WUR-115_GG-WUR-130_GG-WUR-238_GG-WUR-236_GG-WUR-123_GG-WUR-055_GG-WUR-263_GG-WUR-050_GG-WUR-153_GG-WUR-118_GG-WUR-259_GG-…	2651	61|3|0	splice_donor_variant	HIGH	CPE	ENSGALG00000027788	ENSGALT00000046144	-	2/8	-	-	-	-	-	-	-	NA	-	extracellular exosome [GO:0070062]; extracellular space [GO:0005615]; Golgi apparatus [GO:0005794]; neuronal cell body [GO:0043025]; secretory granule [GO:0030141]; synaptic membrane [GO:0097060]; metallocarboxypeptidase activity [GO:0004181]; serine-type carboxypeptidase activity [GO:0004185]; zinc ion binding [GO:0008270]; cardiac left ventricle morphogenesis [GO:0003214]; insulin processing [G…	nervous system,behavior,reproductive,growth/size/body,adipose,endocrine/exocrine,renal/urinary,muscle,hematopoietic,cellular,no abnormal phenotype observed,mortality/aging,integument,digestive/alimentary,skeleton,homeostasis,cardiovascular	NO
4	25599337	CTGTGTGA	CTGTGTGTGA	124983	239	478	478	1	478	0	WA_WD_W1	0:65,0:76,0:98	.:GG-WUR-108_GG-WUR-068_GG-WUR-154_GG-WUR-042_GG-WUR-114_GG-WUR-121_GG-WUR-156_GG-WUR-059_GG-WUR-116_GG-WUR-261_GG-WUR-113_GG-WUR-120_GG-WUR-117_GG-WUR-159_GG-WUR-258_GG-WUR-036_GG-WUR-162_GG-WUR-239_GG-WUR-051_GG-WUR-092_GG-WUR-163_GG-WUR-069_GG-WUR-115_GG-WUR-130_GG-WUR-238_GG-WUR-236_GG-WUR-123_GG-WUR-055_GG-WUR-263_GG-WUR-175_GG-WUR-050_GG-WUR-153_GG-WUR-118_GG-WUR-259_GG-WUR-111_GG-WUR-254_G…	683	61|7|0	splice_donor_variant&5_prime_UTR_variant&intron_variant	HIGH	NEK1	ENSGALG00000009683	ENSGALT00000038693	1/32	1/31	51-?	-	-	-	-	-	-	NA	-	ATP binding [GO:0005524]; protein kinase activity [GO:0004672]ATP binding [GO:0005524]; protein kinase activity [GO:0004672]cytoplasm [GO:0005737]; ATP binding [GO:0005524]; signal transducer, downstream of receptor, with serine/threonine kinase activity [GO:0004702]ATP binding [GO:0005524]; protein kinase activity [GO:0004672]	skeleton,reproductive,growth/size/body,endocrine/exocrine,renal/urinary,hematopoietic,mortality/aging,integument,nervous system,craniofacial,homeostasis	YES
4	25729592	CAC	TAC	109147	245	490	490	1	490	0	WA_WD_W1	0:68,0:77,0:100	.:GG-WUR-108_GG-WUR-262_GG-WUR-068_GG-WUR-154_GG-WUR-042_GG-WUR-114_GG-WUR-121_GG-WUR-156_GG-WUR-059_GG-WUR-253_GG-WUR-116_GG-WUR-261_GG-WUR-257_GG-WUR-113_GG-WUR-120_GG-WUR-117_GG-WUR-159_GG-WUR-258_GG-WUR-036_GG-WUR-162_GG-WUR-256_GG-WUR-239_GG-WUR-051_GG-WUR-092_GG-WUR-163_GG-WUR-069_GG-WUR-115_GG-WUR-130_GG-WUR-238_GG-WUR-236_GG-WUR-123_GG-WUR-055_GG-WUR-263_GG-WUR-175_GG-WUR-050_GG-WUR-153_G…	1155	59|3|0	missense_variant	MODERATE	SH3RF1	ENSGALG00000009692	ENSGALT00000015774	8/12	-	1675-1677	1446-1448	482-483	HT/HM	caCACg/caTATg	-	-	-5.44	PROSITE_profiles:PS50002&PTHR10663&PTHR10663:SF153&Pfam_domain:PF14604&2.30.30.40&SMART_domains:SM00326&Superfamily_domains:SSF50044	cytosol [GO:0005829]; zinc ion binding [GO:0008270]; apoptotic process [GO:0006915]; negative regulation of cysteine-type endopeptidase activity involved in apoptotic process [GO:0043154]; negative regulation of extrinsic apoptotic signaling pathway [GO:2001237]; regulation of JNK cascade [GO:0046328]	-	YES
4	26117223	CT	CG	73159.1	222	444	444	1	444	0	WA_WD_W1	0:49,0:75,0:98	.:GG-WUR-108_GG-WUR-068_GG-WUR-154_GG-WUR-042_GG-WUR-114_GG-WUR-121_GG-WUR-156_GG-WUR-059_GG-WUR-253_GG-WUR-116_GG-WUR-261_GG-WUR-113_GG-WUR-120_GG-WUR-117_GG-WUR-159_GG-WUR-036_GG-WUR-256_GG-WUR-051_GG-WUR-163_GG-WUR-069_GG-WUR-130_GG-WUR-238_GG-WUR-236_GG-WUR-055_GG-WUR-175_GG-WUR-153_GG-WUR-259_GG-WUR-252_GG-WUR-111_GG-WUR-134_GG-WUR-119_GG-WUR-122_GG-WUR-088_GG-WUR-147_GG-WUR-096_GG-WUR-136_G…	-58	0|0|0	splice_acceptor_variant&non_coding_transcript_variant	HIGH	-	ENSGALG00000040600	ENSGALT00000055958	-	1/1	-	-	-	-	-	-	-	NA	-		-	NO
4	30857985	G	A	106262	233	466	466	1	466	0	WA_WD_W1	0:61,0:78,0:94	.:GG-WUR-108_GG-WUR-068_GG-WUR-154_GG-WUR-042_GG-WUR-114_GG-WUR-121_GG-WUR-156_GG-WUR-059_GG-WUR-116_GG-WUR-257_GG-WUR-113_GG-WUR-120_GG-WUR-117_GG-WUR-159_GG-WUR-036_GG-WUR-162_GG-WUR-256_GG-WUR-051_GG-WUR-092_GG-WUR-163_GG-WUR-069_GG-WUR-115_GG-WUR-130_GG-WUR-238_GG-WUR-236_GG-WUR-123_GG-WUR-055_GG-WUR-263_GG-WUR-175_GG-WUR-050_GG-WUR-153_GG-WUR-118_GG-WUR-111_GG-WUR-134_GG-WUR-119_GG-WUR-088_G…	12	0|0|0	splice_donor_variant&non_coding_transcript_variant	HIGH	-	ENSGALG00000032115	ENSGALT00000059830	-	1/2	-	-	-	-	-	-	-	NA	-		-	YES
4	31390617	G	C	134270	248	496	496	1	496	0	WA_WD_W1	0:71,0:78,0:99	.:GG-WUR-108_GG-WUR-262_GG-WUR-068_GG-WUR-154_GG-WUR-042_GG-WUR-114_GG-WUR-121_GG-WUR-156_GG-WUR-059_GG-WUR-253_GG-WUR-116_GG-WUR-261_GG-WUR-257_GG-WUR-113_GG-WUR-120_GG-WUR-117_GG-WUR-159_GG-WUR-258_GG-WUR-036_GG-WUR-162_GG-WUR-256_GG-WUR-239_GG-WUR-051_GG-WUR-092_GG-WUR-163_GG-WUR-069_GG-WUR-115_GG-WUR-130_GG-WUR-238_GG-WUR-236_GG-WUR-123_GG-WUR-055_GG-WUR-263_GG-WUR-175_GG-WUR-050_GG-WUR-153_G…	1454	50|11|3	missense_variant	MODERATE	SMAD1	ENSGALG00000009977	ENSGALT00000016217	1/6	-	415	189	63	K/N	aaG/aaC	-	tolerated(0.22)	-2.816	PROSITE_profiles:PS51075&PTHR13703&PTHR13703:SF23&1ozjA00&Pfam_domain:PF03165&SMART_domains:SM00523&Superfamily_domains:0040928	cytoplasmic vesicle [GO:0031410]; nuclear inner membrane [GO:0005637]; nucleus [GO:0005634]; transcription factor complex [GO:0005667]; primary miRNA binding [GO:0070878]; RNA polymerase II core promoter proximal region sequence-specific DNA binding [GO:0000978]; RNA polymerase II core promoter sequence-specific DNA binding [GO:0000979]; transcriptional activator activity, RNA polymerase II core …	embryo,nervous system,behavior,reproductive,growth/size/body,endocrine/exocrine,digestive/alimentary,cellular,cardiovascular,mortality/aging,muscle,craniofacial,skeleton	NO
4	34284357	TATCC	GATGC	93245.6	232	464	464	1	464	0	WA_WD_W1	0:64,0:75,0:93	.:GG-WUR-108_GG-WUR-262_GG-WUR-068_GG-WUR-154_GG-WUR-042_GG-WUR-114_GG-WUR-121_GG-WUR-156_GG-WUR-059_GG-WUR-253_GG-WUR-116_GG-WUR-257_GG-WUR-113_GG-WUR-120_GG-WUR-117_GG-WUR-159_GG-WUR-258_GG-WUR-036_GG-WUR-162_GG-WUR-239_GG-WUR-051_GG-WUR-092_GG-WUR-163_GG-WUR-069_GG-WUR-115_GG-WUR-130_GG-WUR-238_GG-WUR-123_GG-WUR-055_GG-WUR-175_GG-WUR-050_GG-WUR-153_GG-WUR-118_GG-WUR-259_GG-WUR-111_GG-WUR-134_G…	682	61|2|0	missense_variant	MODERATE	C4orf33	ENSGALG00000010108	ENSGALT00000016438	6/6	-	875-879	582-586	194-196	SDI/SHL	tcGGATAta/tcGCATCta	-	-	-2.62	PTHR31475:SF4&PTHR31475	-	-	NO
4	34333519	A	T	81471.3	241	437	482	0.906639	408	29	WA_WD_W1	0:65,29:39,0:100	.:GG-WUR-108_GG-WUR-068_GG-WUR-154_GG-WUR-042_GG-WUR-114_GG-WUR-121_GG-WUR-156_GG-WUR-059_GG-WUR-253_GG-WUR-116_GG-WUR-261_GG-WUR-257_GG-WUR-113_GG-WUR-120_GG-WUR-117_GG-WUR-159_GG-WUR-258_GG-WUR-036_GG-WUR-162_GG-WUR-256_GG-WUR-239_GG-WUR-051_GG-WUR-092_GG-WUR-163_GG-WUR-069_GG-WUR-115_GG-WUR-130_GG-WUR-238_GG-WUR-236_GG-WUR-123_GG-WUR-055_GG-WUR-175_GG-WUR-050_GG-WUR-153_GG-WUR-118_GG-WUR-252_G…	217	52|5|2	missense_variant	MODERATE	SH2D4A	ENSGALG00000010122	ENSGALT00000065408	4/9	-	544	544	182	N/Y	Aat/Tat	-	deleterious(0.03)	-1.099	PTHR14388:SF5&PTHR14388	cytoplasm [GO:0005737]; negative regulation of phosphatase activity [GO:0010923]	no abnormal phenotype observed	YES
4	34611618	CA	CG	73942.9	224	447	448	0.997768	446	1	WA_WD_W1	0:60,0:71,1:92	.:GG-WUR-108_GG-WUR-262_GG-WUR-068_GG-WUR-154_GG-WUR-042_GG-WUR-121_GG-WUR-156_GG-WUR-059_GG-WUR-116_GG-WUR-261_GG-WUR-113_GG-WUR-120_GG-WUR-159_GG-WUR-036_GG-WUR-162_GG-WUR-256_GG-WUR-239_GG-WUR-051_GG-WUR-092_GG-WUR-163_GG-WUR-069_GG-WUR-115_GG-WUR-130_GG-WUR-238_GG-WUR-236_GG-WUR-123_GG-WUR-055_GG-WUR-175_GG-WUR-050_GG-WUR-153_GG-WUR-118_GG-WUR-259_GG-WUR-252_GG-WUR-111_GG-WUR-134_GG-WUR-119_G…	691	66|3|0	missense_variant	MODERATE	PLK4	ENSGALG00000010195	ENSGALT00000016572	7/16	-	1756-1757	1756-1757	586	H/R	CAt/CGt	-	tolerated(0.32)	-3.151	PTHR24345:SF50&PTHR24345	centriole [GO:0005814]; ATP binding [GO:0005524]; protein serine/threonine kinase activity [GO:0004674]; centriole replication [GO:0007099]centriole [GO:0005814]; deuterosome [GO:0098536]; nucleolus [GO:0005730]; XY body [GO:0001741]; ATP binding [GO:0005524]; protein serine/threonine kinase activity [GO:0004674]; centriole replication [GO:0007099]; de novo centriole assembly involved in multi-ci…	embryo,reproductive,growth/size/body,endocrine/exocrine,cellular,mortality/aging,nervous system,homeostasis	NO
4	35763053	A	G	74464.8	200	400	400	1	400	0	WA_WD_W1	0:50,0:66,0:84	.:GG-WUR-108_GG-WUR-154_GG-WUR-042_GG-WUR-121_GG-WUR-156_GG-WUR-059_GG-WUR-116_GG-WUR-261_GG-WUR-113_GG-WUR-120_GG-WUR-159_GG-WUR-036_GG-WUR-162_GG-WUR-051_GG-WUR-163_GG-WUR-069_GG-WUR-115_GG-WUR-130_GG-WUR-236_GG-WUR-055_GG-WUR-175_GG-WUR-050_GG-WUR-153_GG-WUR-252_GG-WUR-111_GG-WUR-134_GG-WUR-119_GG-WUR-088_GG-WUR-147_GG-WUR-090_GG-WUR-096_GG-WUR-136_GG-WUR-160_GG-WUR-135_GG-WUR-164_GG-WUR-039_G…	711	48|5|4	missense_variant	MODERATE	MMRN1	ENSGALG00000010391	ENSGALT00000016922	5/8	-	878	878	293	N/S	aAt/aGt	-	deleterious(0)	-0.12	PTHR15427:SF3&PTHR15427&Coiled-coils_(Ncoils):Coil	extracellular matrix [GO:0031012]; blood coagulation [GO:0007596]	reproductive	YES
4	35769947	GAGAT	GAGAC	107625	244	488	488	1	488	0	WA_WD_W1	0:67,0:77,0:100	.:GG-WUR-108_GG-WUR-262_GG-WUR-068_GG-WUR-154_GG-WUR-042_GG-WUR-114_GG-WUR-121_GG-WUR-156_GG-WUR-059_GG-WUR-253_GG-WUR-116_GG-WUR-261_GG-WUR-113_GG-WUR-120_GG-WUR-117_GG-WUR-159_GG-WUR-258_GG-WUR-036_GG-WUR-162_GG-WUR-239_GG-WUR-051_GG-WUR-092_GG-WUR-163_GG-WUR-069_GG-WUR-115_GG-WUR-130_GG-WUR-238_GG-WUR-236_GG-WUR-123_GG-WUR-055_GG-WUR-263_GG-WUR-175_GG-WUR-050_GG-WUR-153_GG-WUR-118_GG-WUR-259_G…	998	48|5|4	missense_variant	MODERATE	MMRN1	ENSGALG00000010391	ENSGALT00000016922	6/8	-	2108-2112	2108-2112	703-704	RD/QD	cGAGAT/cAAGAC	-	-	-7.188	PTHR15427:SF3&PTHR15427	extracellular matrix [GO:0031012]; blood coagulation [GO:0007596]	reproductive	NO
4	44626386	AGGGGGGT	AGGGGGT	82611.3	225	450	450	1	450	0	WA_WD_W1	0:61,0:71,0:93	.:GG-WUR-108_GG-WUR-068_GG-WUR-154_GG-WUR-042_GG-WUR-121_GG-WUR-156_GG-WUR-059_GG-WUR-116_GG-WUR-261_GG-WUR-257_GG-WUR-113_GG-WUR-120_GG-WUR-117_GG-WUR-159_GG-WUR-258_GG-WUR-036_GG-WUR-162_GG-WUR-239_GG-WUR-051_GG-WUR-092_GG-WUR-163_GG-WUR-069_GG-WUR-115_GG-WUR-130_GG-WUR-123_GG-WUR-055_GG-WUR-263_GG-WUR-050_GG-WUR-153_GG-WUR-118_GG-WUR-252_GG-WUR-111_GG-WUR-254_GG-WUR-134_GG-WUR-119_GG-WUR-122_G…	38	62|1|0	splice_donor_variant&coding_sequence_variant	HIGH	WDR17	ENSGALG00000043106	ENSGALT00000077839	8/30	8/29	1311-?	1311-?	437-?	-	-	-	-	NA	-	-	-	NO
4	45255813	GAAAAAAAC	GAAAAAAC	93535.9	240	480	480	1	480	0	WA_WD_W1	0:68,0:75,0:97	.:GG-WUR-108_GG-WUR-262_GG-WUR-068_GG-WUR-154_GG-WUR-042_GG-WUR-114_GG-WUR-121_GG-WUR-156_GG-WUR-059_GG-WUR-116_GG-WUR-261_GG-WUR-257_GG-WUR-113_GG-WUR-120_GG-WUR-117_GG-WUR-159_GG-WUR-036_GG-WUR-162_GG-WUR-256_GG-WUR-239_GG-WUR-051_GG-WUR-092_GG-WUR-163_GG-WUR-069_GG-WUR-115_GG-WUR-130_GG-WUR-238_GG-WUR-236_GG-WUR-123_GG-WUR-055_GG-WUR-263_GG-WUR-175_GG-WUR-050_GG-WUR-153_GG-WUR-118_GG-WUR-259_G…	332	52|25|2	frameshift_variant	HIGH	PAQR3	ENSGALG00000010886	ENSGALT00000017695	5/5	-	815-822	815-822	272-274	CFF/CFX	tGTTTTTTT/tGTTTTTT	-	-	NA	Pfam_domain:PF03006	Golgi apparatus [GO:0005794]; integral component of membrane [GO:0016021]; receptor activity [GO:0004872]; negative regulation of MAP kinase activity [GO:0043407]; negative regulation of neuron projection development [GO:0010977]; negative regulation of peptidyl-serine phosphorylation [GO:0033137]; protein localization to Golgi apparatus [GO:0034067]	integument,neoplasm,homeostasis,cellular	NO
4	46717772	G	A	135834	242	484	484	1	484	0	WA_WD_W1	0:69,0:75,0:98	.:GG-WUR-108_GG-WUR-262_GG-WUR-068_GG-WUR-154_GG-WUR-042_GG-WUR-114_GG-WUR-121_GG-WUR-156_GG-WUR-059_GG-WUR-253_GG-WUR-116_GG-WUR-261_GG-WUR-257_GG-WUR-113_GG-WUR-120_GG-WUR-117_GG-WUR-159_GG-WUR-258_GG-WUR-036_GG-WUR-162_GG-WUR-256_GG-WUR-239_GG-WUR-051_GG-WUR-092_GG-WUR-163_GG-WUR-069_GG-WUR-115_GG-WUR-130_GG-WUR-238_GG-WUR-236_GG-WUR-123_GG-WUR-055_GG-WUR-263_GG-WUR-175_GG-WUR-050_GG-WUR-153_G…	1082	64|10|0	missense_variant	MODERATE	ENOPH1	ENSGALG00000011178	ENSGALT00000049296	6/6	-	668	593	198	T/M	aCg/aTg	-	deleterious_low_confidence(0.01)	-0.463	-	cytoplasm [GO:0005737]; extracellular exosome [GO:0070062]; nucleus [GO:0005634]; 2,3-diketo-5-methylthiopentyl-1-phosphate enolase activity [GO:0043715]; 2-hydroxy-3-keto-5-methylthiopentenyl-1-phosphate phosphatase activity [GO:0043716]; acireductone synthase activity [GO:0043874]; magnesium ion binding [GO:0000287]; L-methionine biosynthetic process from methylthioadenosine [GO:0019509]; L-met…	-	YES
4	54516109	T	G	111357	248	453	496	0.913306	412	41	WA_WD_W1	9:62,1:76,31:68	GG-WUR-068_GG-WUR-120_GG-WUR-117_GG-WUR-092_GG-WUR-263_GG-WUR-175_GG-WUR-147_GG-WUR-096_GG-WUR-136:GG-WUR-108_GG-WUR-262_GG-WUR-154_GG-WUR-042_GG-WUR-114_GG-WUR-121_GG-WUR-156_GG-WUR-059_GG-WUR-253_GG-WUR-116_GG-WUR-261_GG-WUR-257_GG-WUR-113_GG-WUR-159_GG-WUR-258_GG-WUR-036_GG-WUR-162_GG-WUR-256_GG-WUR-239_GG-WUR-051_GG-WUR-163_GG-WUR-069_GG-WUR-115_GG-WUR-130_GG-WUR-238_GG-WUR-236_GG-WUR-123_GG-…	253	48|4|0	missense_variant&splice_region_variant	MODERATE	TNIP3	ENSGALG00000011961	ENSGALT00000019506	7/9	-	644	644	215	M/R	aTg/aGg	-	deleterious(0)	1	Coiled-coils_(Ncoils):Coil&PTHR31882&PTHR31882:SF2	cellular response to lipopolysaccharide [GO:0071222]; MyD88-independent toll-like receptor signaling pathway [GO:0002756]; negative regulation of I-kappaB kinase/NF-kappaB signaling [GO:0043124]; toll-like receptor 4 signaling pathway [GO:0034142]	no abnormal phenotype observed	YES
4	55095491	G	A	99924.1	237	457	474	0.964135	444	13	WA_WD_W1	13:50,0:78,0:94	GG-WUR-116_GG-WUR-258_GG-WUR-239_GG-WUR-051_GG-WUR-130_GG-WUR-050_GG-WUR-153_GG-WUR-111_GG-WUR-119_GG-WUR-240_GG-WUR-039_GG-WUR-060_GG-WUR-237:GG-WUR-108_GG-WUR-262_GG-WUR-068_GG-WUR-154_GG-WUR-042_GG-WUR-114_GG-WUR-121_GG-WUR-156_GG-WUR-059_GG-WUR-257_GG-WUR-113_GG-WUR-120_GG-WUR-117_GG-WUR-159_GG-WUR-036_GG-WUR-162_GG-WUR-092_GG-WUR-163_GG-WUR-069_GG-WUR-115_GG-WUR-238_GG-WUR-236_GG-WUR-123_GG-…	1732	61|9|0	missense_variant	MODERATE	USP53	ENSGALG00000011990	ENSGALT00000019558	12/15	-	2006	1484	495	P/L	cCg/cTg	-	deleterious(0.02)	-8.501	PTHR22975&PTHR22975:SF6	cell-cell junction [GO:0005911]; thiol-dependent ubiquitinyl hydrolase activity [GO:0036459]; action potential [GO:0001508]; neuron apoptotic process [GO:0051402]; protein deubiquitination [GO:0016579]; response to auditory stimulus [GO:0010996]; sensory perception of sound [GO:0007605]	hearing/vestibular/ear,nervous system,behavior	YES
4	55325940	CCCT	ACCT	90894.3	237	458	474	0.966245	444	14	WA_WD_W1	13:52,1:74,0:96	GG-WUR-116_GG-WUR-258_GG-WUR-051_GG-WUR-130_GG-WUR-050_GG-WUR-153_GG-WUR-111_GG-WUR-119_GG-WUR-136_GG-WUR-240_GG-WUR-039_GG-WUR-060_GG-WUR-237:GG-WUR-108_GG-WUR-262_GG-WUR-068_GG-WUR-154_GG-WUR-042_GG-WUR-114_GG-WUR-121_GG-WUR-156_GG-WUR-059_GG-WUR-261_GG-WUR-113_GG-WUR-120_GG-WUR-117_GG-WUR-159_GG-WUR-036_GG-WUR-162_GG-WUR-256_GG-WUR-092_GG-WUR-163_GG-WUR-069_GG-WUR-115_GG-WUR-238_GG-WUR-236_GG-…	1365	60|8|2	missense_variant	MODERATE	SEC24D	ENSGALG00000011998	ENSGALT00000019581	21/22	-	2955-2958	2911-2914	971-972	PY/TY	CCCTac/ACCTac	-	-	-6.131	3.40.20.10&Pfam_domain:PF00626&PTHR13803&PTHR13803:SF6&Superfamily_domains:SSF82754	COPII vesicle coat [GO:0030127]; zinc ion binding [GO:0008270]; ER to Golgi vesicle-mediated transport [GO:0006888]; intracellular protein transport [GO:0006886]	mortality/aging,no abnormal phenotype observed	YES
4	58203564	G	A	84586.1	233	435	466	0.933476	412	23	WA_WD_W1	4:60,0:77,19:69	GG-WUR-156_GG-WUR-257_GG-WUR-123_GG-WUR-122:GG-WUR-108_GG-WUR-262_GG-WUR-068_GG-WUR-154_GG-WUR-042_GG-WUR-114_GG-WUR-121_GG-WUR-059_GG-WUR-116_GG-WUR-261_GG-WUR-113_GG-WUR-120_GG-WUR-117_GG-WUR-159_GG-WUR-258_GG-WUR-036_GG-WUR-239_GG-WUR-051_GG-WUR-092_GG-WUR-163_GG-WUR-069_GG-WUR-115_GG-WUR-130_GG-WUR-238_GG-WUR-236_GG-WUR-055_GG-WUR-263_GG-WUR-175_GG-WUR-050_GG-WUR-153_GG-WUR-118_GG-WUR-259_GG-…	208	62|7|2	splice_donor_variant	HIGH	ENPEP	ENSGALG00000031410	ENSGALT00000064473	-	12/18	-	-	-	-	-	-	-	NA	-	integral component of membrane [GO:0016021]; metalloaminopeptidase activity [GO:0070006]; zinc ion binding [GO:0008270]; angiotensin maturation [GO:0002003]	no abnormal phenotype observed	YES
4	58527504	G	A	100323	239	478	478	1	478	0	WA_WD_W1	0:66,0:76,0:97	.:GG-WUR-108_GG-WUR-262_GG-WUR-068_GG-WUR-154_GG-WUR-042_GG-WUR-114_GG-WUR-121_GG-WUR-156_GG-WUR-059_GG-WUR-253_GG-WUR-116_GG-WUR-261_GG-WUR-113_GG-WUR-120_GG-WUR-117_GG-WUR-159_GG-WUR-258_GG-WUR-036_GG-WUR-162_GG-WUR-239_GG-WUR-051_GG-WUR-092_GG-WUR-163_GG-WUR-069_GG-WUR-115_GG-WUR-130_GG-WUR-238_GG-WUR-236_GG-WUR-123_GG-WUR-055_GG-WUR-175_GG-WUR-050_GG-WUR-153_GG-WUR-118_GG-WUR-111_GG-WUR-254_G…	3165	50|16|0	missense_variant	MODERATE	MCUB	ENSGALG00000012196	ENSGALT00000019912	7/8	-	924	908	303	A/V	gCc/gTc	-	deleterious(0.01)	-1.135	Pfam_domain:PF04678&PTHR13462&PTHR13462:SF6	integral component of mitochondrial inner membrane [GO:0031305]; uniplex complex [GO:1990246]; calcium channel inhibitor activity [GO:0019855]; mitochondrial calcium ion homeostasis [GO:0051560]; mitochondrial calcium uptake [GO:0036444]	reproductive,endocrine/exocrine,immune,hematopoietic,behavior,integument,homeostasis	YES
4	58534606	C	T	114624	249	493	498	0.98996	488	5	WA_WD_W1	5:66,0:78,0:100	GG-WUR-156_GG-WUR-253_GG-WUR-257_GG-WUR-123_GG-WUR-122:GG-WUR-108_GG-WUR-262_GG-WUR-068_GG-WUR-154_GG-WUR-042_GG-WUR-114_GG-WUR-121_GG-WUR-059_GG-WUR-116_GG-WUR-261_GG-WUR-113_GG-WUR-120_GG-WUR-117_GG-WUR-159_GG-WUR-258_GG-WUR-036_GG-WUR-162_GG-WUR-256_GG-WUR-239_GG-WUR-051_GG-WUR-092_GG-WUR-163_GG-WUR-069_GG-WUR-115_GG-WUR-130_GG-WUR-238_GG-WUR-236_GG-WUR-055_GG-WUR-263_GG-WUR-175_GG-WUR-050_GG-…	1539	50|16|0	missense_variant	MODERATE	MCUB	ENSGALG00000012196	ENSGALT00000019912	3/8	-	251	235	79	V/M	Gtg/Atg	-	deleterious(0.02)	-0.754	PTHR13462&PTHR13462:SF6	integral component of mitochondrial inner membrane [GO:0031305]; uniplex complex [GO:1990246]; calcium channel inhibitor activity [GO:0019855]; mitochondrial calcium ion homeostasis [GO:0051560]; mitochondrial calcium uptake [GO:0036444]	reproductive,endocrine/exocrine,immune,hematopoietic,behavior,integument,homeostasis	YES
4	61232088	TTCTCTCTCTCTCTCA	TTCTCTCTCTCTCA	98325.9	239	478	478	1	478	0	WA_WD_W1	0:69,0:75,0:95	.:GG-WUR-108_GG-WUR-262_GG-WUR-068_GG-WUR-154_GG-WUR-042_GG-WUR-114_GG-WUR-121_GG-WUR-156_GG-WUR-059_GG-WUR-253_GG-WUR-116_GG-WUR-261_GG-WUR-257_GG-WUR-113_GG-WUR-120_GG-WUR-117_GG-WUR-159_GG-WUR-258_GG-WUR-036_GG-WUR-256_GG-WUR-239_GG-WUR-051_GG-WUR-092_GG-WUR-163_GG-WUR-069_GG-WUR-115_GG-WUR-130_GG-WUR-238_GG-WUR-236_GG-WUR-123_GG-WUR-055_GG-WUR-263_GG-WUR-175_GG-WUR-050_GG-WUR-153_GG-WUR-118_G…	1719	56|6|0	splice_acceptor_variant&intron_variant	HIGH	NFKB1	ENSGALG00000012304	ENSGALT00000037607	-	23/23	-	-	-	-	-	-	-	NA	-	cytosol [GO:0005829]; I-kappaB/NF-kappaB complex [GO:0033256]; nucleus [GO:0005634]; chromatin binding [GO:0003682]; NF-kappaB binding [GO:0051059]; RNA polymerase II regulatory region sequence-specific DNA binding [GO:0000977]; RNA polymerase II transcription factor activity, sequence-specific DNA binding [GO:0000981]; I-kappaB kinase/NF-kappaB signaling [GO:0007249]; inflammatory response [GO:0…	respiratory,behavior,hearing/vestibular/ear,growth/size/body,liver/biliary,immune,hematopoietic,cellular,no abnormal phenotype observed,mortality/aging,integument,nervous system,skeleton,homeostasis,digestive/alimentary	NO
4	61716029	G	T	79239.9	245	456	490	0.930612	426	30	WA_WD_W1	0:69,30:44,0:100	.:GG-WUR-108_GG-WUR-262_GG-WUR-068_GG-WUR-154_GG-WUR-042_GG-WUR-114_GG-WUR-121_GG-WUR-156_GG-WUR-059_GG-WUR-253_GG-WUR-116_GG-WUR-261_GG-WUR-257_GG-WUR-113_GG-WUR-120_GG-WUR-117_GG-WUR-159_GG-WUR-258_GG-WUR-036_GG-WUR-162_GG-WUR-256_GG-WUR-239_GG-WUR-051_GG-WUR-092_GG-WUR-163_GG-WUR-069_GG-WUR-115_GG-WUR-130_GG-WUR-238_GG-WUR-236_GG-WUR-123_GG-WUR-055_GG-WUR-263_GG-WUR-175_GG-WUR-050_GG-WUR-153_G…	312	64|0|4	missense_variant	MODERATE	TLR3	ENSGALG00000013468	ENSGALT00000021952	8/9	-	2484	2484	828	R/S	agG/agT	-	deleterious_low_confidence(0)	-0.037	-	integral component of membrane [GO:0016021]; double-stranded RNA binding [GO:0003725]; transmembrane signaling receptor activity [GO:0004888]; defense response to virus [GO:0051607]; innate immune response [GO:0045087]; MyD88-independent toll-like receptor signaling pathway [GO:0002756]; positive regulation of chemokine production [GO:0032722]; positive regulation of inflammatory response [GO:005…	respiratory,reproductive,muscle,endocrine/exocrine,immune,neoplasm,hematopoietic,behavior,mortality/aging,nervous system,homeostasis,cardiovascular	YES
4	61736983	G	C	77057.3	222	410	444	0.923423	382	28	WA_WD_W1	0:54,28:43,0:94	.:GG-WUR-108_GG-WUR-068_GG-WUR-154_GG-WUR-042_GG-WUR-114_GG-WUR-121_GG-WUR-156_GG-WUR-059_GG-WUR-116_GG-WUR-261_GG-WUR-113_GG-WUR-120_GG-WUR-159_GG-WUR-036_GG-WUR-162_GG-WUR-239_GG-WUR-051_GG-WUR-092_GG-WUR-163_GG-WUR-069_GG-WUR-115_GG-WUR-130_GG-WUR-123_GG-WUR-055_GG-WUR-175_GG-WUR-050_GG-WUR-153_GG-WUR-118_GG-WUR-134_GG-WUR-119_GG-WUR-122_GG-WUR-088_GG-WUR-147_GG-WUR-090_GG-WUR-096_GG-WUR-136_G…	698	52|3|0	missense_variant	MODERATE	FAM149A	ENSGALG00000013503	ENSGALT00000021994	6/13	-	735	735	245	M/I	atG/atC	-	deleterious(0.03)	-0.896	PTHR31997&PTHR31997:SF2	-	-	YES
4	65180822	CCTT	CCTTT	88403.8	243	455	486	0.936214	424	31	WA_WD_W1	12:58,14:62,5:92	GG-WUR-116_GG-WUR-261_GG-WUR-120_GG-WUR-258_GG-WUR-256_GG-WUR-153_GG-WUR-054_GG-WUR-094_GG-WUR-053_GG-WUR-155_GG-WUR-035_GG-WUR-237:GG-WUR-108_GG-WUR-262_GG-WUR-068_GG-WUR-154_GG-WUR-042_GG-WUR-114_GG-WUR-121_GG-WUR-156_GG-WUR-059_GG-WUR-253_GG-WUR-257_GG-WUR-113_GG-WUR-117_GG-WUR-159_GG-WUR-036_GG-WUR-162_GG-WUR-239_GG-WUR-051_GG-WUR-092_GG-WUR-163_GG-WUR-069_GG-WUR-115_GG-WUR-130_GG-WUR-238_GG-…	304	20|1|0	frameshift_variant	HIGH	-	ENSGALG00000037917	ENSGALT00000059706	2/2	-	437-439	437-439	146-147	KG/KRX	aAAGgt/aAAAGgt	-	-	NA	-	-	-	NO
4	65351482	T	C	106868	236	472	472	1	472	0	WA_WD_W1	0:63,0:77,0:96	.:GG-WUR-108_GG-WUR-068_GG-WUR-154_GG-WUR-042_GG-WUR-114_GG-WUR-121_GG-WUR-156_GG-WUR-059_GG-WUR-253_GG-WUR-116_GG-WUR-257_GG-WUR-113_GG-WUR-120_GG-WUR-159_GG-WUR-036_GG-WUR-162_GG-WUR-239_GG-WUR-051_GG-WUR-092_GG-WUR-163_GG-WUR-069_GG-WUR-115_GG-WUR-130_GG-WUR-238_GG-WUR-236_GG-WUR-123_GG-WUR-055_GG-WUR-175_GG-WUR-050_GG-WUR-153_GG-WUR-118_GG-WUR-259_GG-WUR-252_GG-WUR-111_GG-WUR-134_GG-WUR-119_G…	286	59|12|0	missense_variant	MODERATE	CEP135	ENSGALG00000013776	ENSGALT00000037552	14/24	-	2391	1515	505	L/F	ttA/ttC	-	deleterious(0.05)	-2.702	PTHR23159&PTHR23159:SF18&Superfamily_domains:SSF57997&Coiled-coils_(Ncoils):Coil	centriole replication [GO:0007099]; centriole-centriole cohesion [GO:0010457]centriole replication [GO:0007099]; centriole-centriole cohesion [GO:0010457]centriole replication [GO:0007099]; centriole-centriole cohesion [GO:0010457]	-	YES
4	66961802	GTTTTTTTC	GTTTTTTTTC	77556.7	226	451	452	0.997788	450	1	WA_WD_W1	0:58,0:75,1:92	.:GG-WUR-108_GG-WUR-068_GG-WUR-154_GG-WUR-042_GG-WUR-121_GG-WUR-156_GG-WUR-059_GG-WUR-116_GG-WUR-113_GG-WUR-120_GG-WUR-117_GG-WUR-159_GG-WUR-258_GG-WUR-036_GG-WUR-162_GG-WUR-239_GG-WUR-051_GG-WUR-092_GG-WUR-163_GG-WUR-069_GG-WUR-115_GG-WUR-130_GG-WUR-238_GG-WUR-236_GG-WUR-123_GG-WUR-055_GG-WUR-175_GG-WUR-050_GG-WUR-153_GG-WUR-118_GG-WUR-111_GG-WUR-134_GG-WUR-119_GG-WUR-122_GG-WUR-088_GG-WUR-147_G…	905	57|3|0	splice_acceptor_variant&intron_variant	HIGH	TEC	ENSGALG00000014124	ENSGALT00000022858	-	11/18	-	-	-	-	-	-	-	NA	-	cytoskeleton [GO:0005856]; extrinsic component of cytoplasmic side of plasma membrane [GO:0031234]; ATP binding [GO:0005524]; non-membrane spanning protein tyrosine kinase activity [GO:0004715]; B cell receptor signaling pathway [GO:0050853]; cell differentiation [GO:0030154]; innate immune response [GO:0045087]; integrin-mediated signaling pathway [GO:0007229]; intracellular signal transduction …	embryo,pigmentation,behavior,immune,growth/size/body,adipose,endocrine/exocrine,liver/biliary,hearing/vestibular/ear,hematopoietic,cellular,mortality/aging,integument,nervous system,homeostasis	NO
4	68036746	T	C	103167	234	468	468	1	468	0	WA_WD_W1	0:62,0:76,0:96	.:GG-WUR-108_GG-WUR-068_GG-WUR-154_GG-WUR-042_GG-WUR-114_GG-WUR-121_GG-WUR-156_GG-WUR-059_GG-WUR-116_GG-WUR-257_GG-WUR-113_GG-WUR-120_GG-WUR-117_GG-WUR-159_GG-WUR-036_GG-WUR-162_GG-WUR-256_GG-WUR-051_GG-WUR-092_GG-WUR-163_GG-WUR-069_GG-WUR-115_GG-WUR-130_GG-WUR-238_GG-WUR-236_GG-WUR-123_GG-WUR-055_GG-WUR-263_GG-WUR-175_GG-WUR-050_GG-WUR-153_GG-WUR-118_GG-WUR-259_GG-WUR-252_GG-WUR-111_GG-WUR-134_G…	1122	68|2|0	missense_variant	MODERATE	-	ENSGALG00000014217	ENSGALT00000022989	8/8	-	893	893	298	E/G	gAa/gGa	-	deleterious(0.03)	-4.889	PTHR23115:SF97&PTHR23115	mitochondrion [GO:0005739]; GTP binding [GO:0005525]; GTPase activity [GO:0003924]; translation [GO:0006412]	-	YES
4	68042887	G	C	74900.9	218	436	436	1	436	0	WA_WD_W1	0:61,0:67,0:90	.:GG-WUR-108_GG-WUR-262_GG-WUR-068_GG-WUR-154_GG-WUR-042_GG-WUR-156_GG-WUR-059_GG-WUR-253_GG-WUR-116_GG-WUR-261_GG-WUR-257_GG-WUR-113_GG-WUR-117_GG-WUR-159_GG-WUR-258_GG-WUR-162_GG-WUR-256_GG-WUR-239_GG-WUR-051_GG-WUR-092_GG-WUR-163_GG-WUR-069_GG-WUR-115_GG-WUR-130_GG-WUR-238_GG-WUR-236_GG-WUR-123_GG-WUR-055_GG-WUR-263_GG-WUR-175_GG-WUR-050_GG-WUR-153_GG-WUR-118_GG-WUR-259_GG-WUR-252_GG-WUR-111_G…	203	68|2|0	missense_variant	MODERATE	-	ENSGALG00000014217	ENSGALT00000022989	1/8	-	26	26	9	S/W	tCg/tGg	-	deleterious_low_confidence(0.04)	-0.63	-	mitochondrion [GO:0005739]; GTP binding [GO:0005525]; GTPase activity [GO:0003924]; translation [GO:0006412]	-	YES
4	68071167	GTTTTTTTTTC	GTTTTTTTTTTTTC	52652.3	208	407	416	0.978365	398	9	WA_WD_W1	2:55,1:65,6:79	GG-WUR-239_GG-WUR-259:GG-WUR-108_GG-WUR-068_GG-WUR-154_GG-WUR-042_GG-WUR-114_GG-WUR-121_GG-WUR-156_GG-WUR-059_GG-WUR-253_GG-WUR-116_GG-WUR-257_GG-WUR-113_GG-WUR-120_GG-WUR-117_GG-WUR-159_GG-WUR-258_GG-WUR-036_GG-WUR-162_GG-WUR-051_GG-WUR-092_GG-WUR-163_GG-WUR-069_GG-WUR-130_GG-WUR-238_GG-WUR-236_GG-WUR-123_GG-WUR-055_GG-WUR-175_GG-WUR-153_GG-WUR-111_GG-WUR-134_GG-WUR-119_GG-WUR-122_GG-WUR-147_GG-…	671	56|5|0	splice_acceptor_variant&intron_variant	HIGH	YIPF7	ENSGALG00000014221	ENSGALT00000022997	-	4/5	-	-	-	-	-	-	-	NA	-	integral component of membrane [GO:0016021]	-	YES
4	77955170	C	T	105656	235	470	470	1	470	0	WA_WD_W1	0:61,0:77,0:97	.:GG-WUR-108_GG-WUR-262_GG-WUR-068_GG-WUR-154_GG-WUR-042_GG-WUR-114_GG-WUR-121_GG-WUR-156_GG-WUR-059_GG-WUR-116_GG-WUR-113_GG-WUR-120_GG-WUR-117_GG-WUR-159_GG-WUR-036_GG-WUR-162_GG-WUR-256_GG-WUR-239_GG-WUR-051_GG-WUR-092_GG-WUR-163_GG-WUR-069_GG-WUR-115_GG-WUR-130_GG-WUR-238_GG-WUR-123_GG-WUR-055_GG-WUR-175_GG-WUR-050_GG-WUR-153_GG-WUR-118_GG-WUR-259_GG-WUR-111_GG-WUR-134_GG-WUR-119_GG-WUR-122_G…	5521	51|7|0	missense_variant	MODERATE	BOD1L1	ENSGALG00000026470	ENSGALT00000045755	10/25	-	2268	1964	655	T/I	aCt/aTt	-	-	-3.329	PTHR31532&PTHR31532:SF3	nucleoplasm [GO:0005654]; cellular response to DNA damage stimulus [GO:0006974]; replication fork processing [GO:0031297]	-	YES
4	79678131	G	A	107047	240	480	480	1	480	0	WA_WD_W1	0:67,0:77,0:96	.:GG-WUR-108_GG-WUR-262_GG-WUR-068_GG-WUR-154_GG-WUR-042_GG-WUR-114_GG-WUR-121_GG-WUR-156_GG-WUR-059_GG-WUR-253_GG-WUR-116_GG-WUR-261_GG-WUR-257_GG-WUR-113_GG-WUR-120_GG-WUR-117_GG-WUR-159_GG-WUR-258_GG-WUR-036_GG-WUR-162_GG-WUR-256_GG-WUR-239_GG-WUR-051_GG-WUR-092_GG-WUR-163_GG-WUR-069_GG-WUR-115_GG-WUR-130_GG-WUR-236_GG-WUR-123_GG-WUR-055_GG-WUR-263_GG-WUR-175_GG-WUR-050_GG-WUR-153_GG-WUR-118_G…	1077	53|6|0	missense_variant	MODERATE	EVC2	ENSGALG00000015029	ENSGALT00000037262	22/22	-	3874	3859	1287	L/F	Ctt/Ttt	-	-	-2.977	PTHR16795&PTHR16795:SF14	cilium [GO:0005929]; integral component of membrane [GO:0016021]; nucleus [GO:0005634]; smoothened signaling pathway [GO:0007224]	skeleton,craniofacial,limbs/digits/tail,cellular,no abnormal phenotype observed,mortality/aging,growth/size/body	YES
4	79731035	G	A	123717	246	492	492	1	492	0	WA_WD_W1	0:68,0:78,0:100	.:GG-WUR-108_GG-WUR-262_GG-WUR-068_GG-WUR-154_GG-WUR-042_GG-WUR-114_GG-WUR-121_GG-WUR-156_GG-WUR-059_GG-WUR-253_GG-WUR-116_GG-WUR-261_GG-WUR-113_GG-WUR-120_GG-WUR-117_GG-WUR-159_GG-WUR-258_GG-WUR-036_GG-WUR-162_GG-WUR-256_GG-WUR-239_GG-WUR-051_GG-WUR-092_GG-WUR-163_GG-WUR-069_GG-WUR-115_GG-WUR-130_GG-WUR-238_GG-WUR-236_GG-WUR-123_GG-WUR-055_GG-WUR-263_GG-WUR-175_GG-WUR-050_GG-WUR-153_GG-WUR-118_G…	369	53|6|0	missense_variant	MODERATE	EVC2	ENSGALG00000015029	ENSGALT00000037262	3/22	-	394	379	127	P/S	Ccc/Tcc	-	-	-4.308	PTHR16795&PTHR16795:SF14	cilium [GO:0005929]; integral component of membrane [GO:0016021]; nucleus [GO:0005634]; smoothened signaling pathway [GO:0007224]	skeleton,craniofacial,limbs/digits/tail,cellular,no abnormal phenotype observed,mortality/aging,growth/size/body	YES
4	82455649	TAAAAAAAAAAAG	TAAAAAAAAAAG	75080.5	233	443	466	0.950644	422	21	WA_WD_W1	6:55,4:70,11:86	GG-WUR-113_GG-WUR-117_GG-WUR-092_GG-WUR-238_GG-WUR-175_GG-WUR-122:GG-WUR-108_GG-WUR-068_GG-WUR-154_GG-WUR-042_GG-WUR-114_GG-WUR-121_GG-WUR-156_GG-WUR-059_GG-WUR-253_GG-WUR-116_GG-WUR-261_GG-WUR-257_GG-WUR-120_GG-WUR-159_GG-WUR-258_GG-WUR-036_GG-WUR-162_GG-WUR-239_GG-WUR-051_GG-WUR-163_GG-WUR-069_GG-WUR-130_GG-WUR-236_GG-WUR-123_GG-WUR-055_GG-WUR-263_GG-WUR-050_GG-WUR-153_GG-WUR-118_GG-WUR-111_GG-…	-25	45|18|0	splice_donor_variant&intron_variant	HIGH	DOK7	ENSGALG00000015615	ENSGALT00000073420	-	7/10	-	-	-	-	-	-	-	NA	-	positive regulation of protein tyrosine kinase activity [GO:0061098]	respiratory,growth/size/body,hearing/vestibular/ear,behavior,mortality/aging,nervous system,muscle	NO
4	84478398	G	A	114821	242	484	484	1	484	0	WA_WD_W1	0:68,0:76,0:98	.:GG-WUR-108_GG-WUR-262_GG-WUR-068_GG-WUR-154_GG-WUR-042_GG-WUR-114_GG-WUR-121_GG-WUR-156_GG-WUR-059_GG-WUR-253_GG-WUR-116_GG-WUR-261_GG-WUR-257_GG-WUR-113_GG-WUR-120_GG-WUR-117_GG-WUR-159_GG-WUR-258_GG-WUR-036_GG-WUR-162_GG-WUR-256_GG-WUR-239_GG-WUR-051_GG-WUR-092_GG-WUR-163_GG-WUR-069_GG-WUR-115_GG-WUR-130_GG-WUR-236_GG-WUR-123_GG-WUR-055_GG-WUR-263_GG-WUR-175_GG-WUR-050_GG-WUR-153_GG-WUR-118_G…	657	50|17|0	splice_donor_variant	HIGH	TACC3	ENSGALG00000015709	ENSGALT00000082071	-	5/13	-	-	-	-	-	-	-	NA	-	cytoplasm [GO:0005737]; microtubule cytoskeleton [GO:0015630]; cell proliferation [GO:0008283]; cerebral cortex development [GO:0021987]; microtubule cytoskeleton organization [GO:0000226]	embryo,limbs/digits/tail,behavior,growth/size/body,endocrine/exocrine,liver/biliary,immune,cellular,mortality/aging,craniofacial,hematopoietic,skeleton	YES
4	89504322	CGAGAA	CGAGA	125029	243	460	486	0.946502	438	22	WA_WD_W1	0:67,22:55,0:99	.:GG-WUR-108_GG-WUR-262_GG-WUR-068_GG-WUR-154_GG-WUR-042_GG-WUR-114_GG-WUR-121_GG-WUR-156_GG-WUR-059_GG-WUR-116_GG-WUR-257_GG-WUR-113_GG-WUR-120_GG-WUR-117_GG-WUR-159_GG-WUR-258_GG-WUR-036_GG-WUR-162_GG-WUR-256_GG-WUR-239_GG-WUR-051_GG-WUR-092_GG-WUR-163_GG-WUR-069_GG-WUR-115_GG-WUR-130_GG-WUR-238_GG-WUR-236_GG-WUR-123_GG-WUR-055_GG-WUR-175_GG-WUR-050_GG-WUR-153_GG-WUR-118_GG-WUR-259_GG-WUR-252_G…	866	49|42|0	frameshift_variant	HIGH	SLC4A11	ENSGALG00000016017	ENSGALT00000062841	1/18	-	73-78	73-78	25-26	FS/SX	TTCTCG/TCTCG	-	-	NA	-	integral component of membrane [GO:0016021]; inorganic anion exchanger activity [GO:0005452]	hearing/vestibular/ear,renal/urinary,vision/eye,skeleton,homeostasis	YES
5	216073	CTT	CT	153769	219	438	438	1	438	0	WA_WD_W1	0:51,0:76,0:92	.:GG-WUR-108_GG-WUR-068_GG-WUR-154_GG-WUR-042_GG-WUR-114_GG-WUR-121_GG-WUR-156_GG-WUR-059_GG-WUR-116_GG-WUR-113_GG-WUR-120_GG-WUR-159_GG-WUR-036_GG-WUR-162_GG-WUR-051_GG-WUR-092_GG-WUR-163_GG-WUR-069_GG-WUR-115_GG-WUR-130_GG-WUR-236_GG-WUR-123_GG-WUR-055_GG-WUR-175_GG-WUR-050_GG-WUR-153_GG-WUR-118_GG-WUR-111_GG-WUR-134_GG-WUR-119_GG-WUR-122_GG-WUR-088_GG-WUR-147_GG-WUR-090_GG-WUR-096_GG-WUR-136_G…	589	57|4|2	frameshift_variant	HIGH	MYRF	ENSGALG00000041253	ENSGALT00000054574	21/21	-	2699-2700	2699-2700	900	L/X	cTT/cT	-	-	NA	-	integral component of membrane [GO:0016021]; DNA binding [GO:0003677]; transcription factor activity, sequence-specific DNA binding [GO:0003700]integral component of membrane [GO:0016021]; DNA binding [GO:0003677]; transcription factor activity, sequence-specific DNA binding [GO:0003700]integral component of membrane [GO:0016021]; DNA binding [GO:0003677]; transcription factor activity, sequence-…	mortality/aging,nervous system,vision/eye,behavior	NO
5	10377656	G	C	96057.3	243	462	486	0.950617	440	22	WA_WD_W1	19:47,3:72,0:101	GG-WUR-262_GG-WUR-042_GG-WUR-114_GG-WUR-156_GG-WUR-059_GG-WUR-253_GG-WUR-113_GG-WUR-258_GG-WUR-123_GG-WUR-175_GG-WUR-119_GG-WUR-096_GG-WUR-240_GG-WUR-135_GG-WUR-054_GG-WUR-251_GG-WUR-053_GG-WUR-155_GG-WUR-143:GG-WUR-108_GG-WUR-154_GG-WUR-121_GG-WUR-116_GG-WUR-261_GG-WUR-257_GG-WUR-120_GG-WUR-117_GG-WUR-159_GG-WUR-036_GG-WUR-162_GG-WUR-256_GG-WUR-239_GG-WUR-051_GG-WUR-092_GG-WUR-069_GG-WUR-115_GG-…	-58	0|0|0	splice_acceptor_variant&non_coding_transcript_variant	HIGH	-	ENSGALG00000036273	ENSGALT00000050367	-	4/8	-	-	-	-	-	-	-	NA	-		-	YES
5	12861223	TCC	TCCC	44328.6	181	338	362	0.933702	314	24	WA_WD_W1	6:39,7:49,11:69	GG-WUR-123_GG-WUR-055_GG-WUR-118_GG-WUR-039_GG-WUR-129_GG-WUR-097:GG-WUR-108_GG-WUR-068_GG-WUR-154_GG-WUR-042_GG-WUR-114_GG-WUR-121_GG-WUR-156_GG-WUR-059_GG-WUR-113_GG-WUR-117_GG-WUR-159_GG-WUR-258_GG-WUR-036_GG-WUR-092_GG-WUR-163_GG-WUR-069_GG-WUR-130_GG-WUR-238_GG-WUR-175_GG-WUR-050_GG-WUR-153_GG-WUR-134_GG-WUR-119_GG-WUR-122_GG-WUR-088_GG-WUR-147_GG-WUR-090_GG-WUR-096_GG-WUR-136_GG-WUR-240_GG-…	106	60|7|0	splice_acceptor_variant	HIGH	PTPRJ	ENSGALG00000006382	ENSGALT00000010309	-	4/24	-	-	-	-	-	-	-	NA	-	cell surface [GO:0009986]; cell-cell junction [GO:0005911]; extracellular exosome [GO:0070062]; immunological synapse [GO:0001772]; integral component of membrane [GO:0016021]; protein tyrosine phosphatase activity [GO:0004725]; negative regulation of cell growth [GO:0030308]; negative regulation of cell migration [GO:0030336]; negative regulation of cell proliferation [GO:0008285]; negative regu…	embryo,reproductive,growth/size/body,immune,neoplasm,homeostasis,no abnormal phenotype observed,mortality/aging,muscle,hematopoietic,cardiovascular	NO
5	14115833	A	T	90216.7	239	463	478	0.968619	450	13	WA_WD_W1	0:68,13:59,0:98	.:GG-WUR-108_GG-WUR-262_GG-WUR-068_GG-WUR-154_GG-WUR-042_GG-WUR-114_GG-WUR-121_GG-WUR-156_GG-WUR-059_GG-WUR-253_GG-WUR-116_GG-WUR-261_GG-WUR-257_GG-WUR-113_GG-WUR-120_GG-WUR-117_GG-WUR-159_GG-WUR-258_GG-WUR-162_GG-WUR-256_GG-WUR-239_GG-WUR-051_GG-WUR-092_GG-WUR-163_GG-WUR-069_GG-WUR-115_GG-WUR-130_GG-WUR-236_GG-WUR-123_GG-WUR-055_GG-WUR-263_GG-WUR-175_GG-WUR-050_GG-WUR-153_GG-WUR-118_GG-WUR-259_G…	723	12|2|0	missense_variant	MODERATE	-	ENSGALG00000006608	ENSGALT00000010667	4/7	-	330	236	79	K/M	aAg/aTg	-	deleterious(0.03)	-2.988	PTHR31367&PTHR31367:SF3&Pfam_domain:PF06189	cytosol [GO:0005829]; 5'-nucleotidase activity [GO:0008253]; magnesium ion binding [GO:0000287]; nucleotide binding [GO:0000166]; nucleotide metabolic process [GO:0009117]	-	YES
5	23189994	TTTGCA	TTTGCTTGCA	108830	248	496	496	1	496	0	WA_WD_W1	0:71,0:77,0:100	.:GG-WUR-108_GG-WUR-262_GG-WUR-068_GG-WUR-154_GG-WUR-042_GG-WUR-114_GG-WUR-121_GG-WUR-156_GG-WUR-059_GG-WUR-253_GG-WUR-116_GG-WUR-261_GG-WUR-257_GG-WUR-113_GG-WUR-120_GG-WUR-117_GG-WUR-159_GG-WUR-258_GG-WUR-036_GG-WUR-162_GG-WUR-256_GG-WUR-239_GG-WUR-051_GG-WUR-092_GG-WUR-163_GG-WUR-069_GG-WUR-115_GG-WUR-130_GG-WUR-238_GG-WUR-236_GG-WUR-123_GG-WUR-055_GG-WUR-263_GG-WUR-175_GG-WUR-050_GG-WUR-153_G…	2095	59|9|2	splice_acceptor_variant	HIGH	PACSIN3	ENSGALG00000008231	ENSGALT00000013396	-	10/10	-	-	-	-	-	-	-	NA	-	membrane tubulation [GO:0097320]endosome [GO:0005768]; membrane tubulation [GO:0097320]; regulation of endocytosis [GO:0030100]	skeleton	NO
5	24241064	CCTG	CCTCTG	79824.9	229	458	458	1	458	0	WA_WD_W1	0:62,0:71,0:96	.:GG-WUR-108_GG-WUR-262_GG-WUR-068_GG-WUR-154_GG-WUR-042_GG-WUR-114_GG-WUR-121_GG-WUR-156_GG-WUR-059_GG-WUR-253_GG-WUR-116_GG-WUR-261_GG-WUR-257_GG-WUR-113_GG-WUR-120_GG-WUR-117_GG-WUR-159_GG-WUR-036_GG-WUR-256_GG-WUR-239_GG-WUR-051_GG-WUR-092_GG-WUR-069_GG-WUR-115_GG-WUR-130_GG-WUR-238_GG-WUR-123_GG-WUR-055_GG-WUR-263_GG-WUR-175_GG-WUR-050_GG-WUR-153_GG-WUR-118_GG-WUR-259_GG-WUR-111_GG-WUR-254_G…	689	54|0|2	frameshift_variant	HIGH	-	ENSGALG00000024469	ENSGALT00000041382	1/4	-	198-200	198-200	66-67	DR/DRX	gaCAGg/gaCAGAGg	-	-	NA	-	cytoplasm [GO:0005737]; protein serine/threonine phosphatase inhibitor activity [GO:0004865]; negative regulation of catalytic activity [GO:0043086]; regulation of phosphorylation [GO:0042325]; regulation of protein dephosphorylation [GO:0035304]	-	YES
5	24855721	C	T	127193	243	486	486	1	486	0	WA_WD_W1	0:68,0:77,0:98	.:GG-WUR-108_GG-WUR-262_GG-WUR-068_GG-WUR-154_GG-WUR-042_GG-WUR-114_GG-WUR-121_GG-WUR-156_GG-WUR-059_GG-WUR-116_GG-WUR-261_GG-WUR-257_GG-WUR-113_GG-WUR-120_GG-WUR-117_GG-WUR-159_GG-WUR-036_GG-WUR-162_GG-WUR-256_GG-WUR-239_GG-WUR-051_GG-WUR-092_GG-WUR-163_GG-WUR-069_GG-WUR-115_GG-WUR-130_GG-WUR-238_GG-WUR-236_GG-WUR-123_GG-WUR-055_GG-WUR-175_GG-WUR-050_GG-WUR-153_GG-WUR-118_GG-WUR-259_GG-WUR-252_G…	332	65|2|0	missense_variant	MODERATE	RPAP1	ENSGALG00000008624	ENSGALT00000014052	21/21	-	3226	3076	1026	V/I	Gtc/Atc	-	deleterious(0.02)	0.657	PTHR21483&PTHR21483:SF18	nucleus [GO:0005634]; transcription from RNA polymerase II promoter [GO:0006366]	-	YES
5	25091771	T	C	109092	243	486	486	1	486	0	WA_WD_W1	0:69,0:75,0:99	.:GG-WUR-108_GG-WUR-262_GG-WUR-068_GG-WUR-154_GG-WUR-042_GG-WUR-114_GG-WUR-121_GG-WUR-156_GG-WUR-059_GG-WUR-253_GG-WUR-116_GG-WUR-261_GG-WUR-257_GG-WUR-113_GG-WUR-120_GG-WUR-117_GG-WUR-159_GG-WUR-258_GG-WUR-036_GG-WUR-162_GG-WUR-256_GG-WUR-239_GG-WUR-051_GG-WUR-092_GG-WUR-163_GG-WUR-069_GG-WUR-115_GG-WUR-130_GG-WUR-238_GG-WUR-236_GG-WUR-123_GG-WUR-055_GG-WUR-263_GG-WUR-175_GG-WUR-050_GG-WUR-153_G…	327	51|27|0	missense_variant&splice_region_variant	MODERATE	-	ENSGALG00000008692	ENSGALT00000014145	4/7	-	265	265	89	S/P	Tcc/Ccc	-	deleterious(0.02)	1	PTHR22847:SF432&PTHR22847&Superfamily_domains:SSF50978	-	-	YES
5	26298273	A	G	114278	247	493	494	0.997976	492	1	WA_WD_W1	1:69,0:78,0:99	GG-WUR-256:GG-WUR-108_GG-WUR-262_GG-WUR-068_GG-WUR-154_GG-WUR-042_GG-WUR-114_GG-WUR-121_GG-WUR-156_GG-WUR-059_GG-WUR-253_GG-WUR-116_GG-WUR-257_GG-WUR-113_GG-WUR-120_GG-WUR-117_GG-WUR-159_GG-WUR-258_GG-WUR-036_GG-WUR-162_GG-WUR-239_GG-WUR-051_GG-WUR-092_GG-WUR-163_GG-WUR-069_GG-WUR-115_GG-WUR-130_GG-WUR-238_GG-WUR-236_GG-WUR-123_GG-WUR-055_GG-WUR-263_GG-WUR-175_GG-WUR-050_GG-WUR-153_GG-WUR-118_GG-…	943	59|6|0	missense_variant	MODERATE	PAPLN	ENSGALG00000009315	ENSGALT00000015156	30/31	-	3518	3518	1173	I/T	aTc/aCc	-	tolerated(0.08)	-2.868	PROSITE_profiles:PS50835&PTHR13723&PTHR13723:SF179&Pfam_domain:PF07679&2.60.40.10&SMART_domains:SM00408&SMART_domains:SM00406&SMART_domains:SM00409&Superfamily_domains:SSF48726	proteinaceous extracellular matrix [GO:0005578]; metalloendopeptidase activity [GO:0004222]; zinc ion binding [GO:0008270]proteinaceous extracellular matrix [GO:0005578]; metalloendopeptidase activity [GO:0004222]; serine-type endopeptidase inhibitor activity [GO:0004867]; zinc ion binding [GO:0008270]proteinaceous extracellular matrix [GO:0005578]; metalloendopeptidase activity [GO:0004222]; ser…	homeostasis	YES
5	28944384	AA	ATGCA	93599.9	244	459	488	0.940574	434	25	WA_WD_W1	0:70,0:76,25:71	.:GG-WUR-108_GG-WUR-262_GG-WUR-068_GG-WUR-154_GG-WUR-042_GG-WUR-114_GG-WUR-121_GG-WUR-156_GG-WUR-059_GG-WUR-253_GG-WUR-116_GG-WUR-261_GG-WUR-257_GG-WUR-113_GG-WUR-120_GG-WUR-159_GG-WUR-258_GG-WUR-036_GG-WUR-162_GG-WUR-256_GG-WUR-239_GG-WUR-051_GG-WUR-092_GG-WUR-163_GG-WUR-069_GG-WUR-115_GG-WUR-130_GG-WUR-238_GG-WUR-236_GG-WUR-123_GG-WUR-055_GG-WUR-263_GG-WUR-175_GG-WUR-050_GG-WUR-153_GG-WUR-118_G…	1804	60|13|0	inframe_insertion	MODERATE	ZFYVE26	ENSGALG00000028762	ENSGALT00000045316	10/41	-	1890	1869	623	S/SA	tcT/tcTGCA	-	-	1	Low_complexity_(Seg):seg&PTHR22835&PTHR22835:SF279	centrosome [GO:0005813]; lysosomal membrane [GO:0005765]; midbody [GO:0030496]; metal ion binding [GO:0046872]; phosphatidylinositol-3-phosphate binding [GO:0032266]; cytokinesis [GO:0000910]; double-strand break repair via homologous recombination [GO:0000724]	behavior,growth/size/body,hearing/vestibular/ear,renal/urinary,cellular,nervous system,skeleton	YES
5	39070308	G	A	175576	215	430	430	1	430	0	WA_WD_W1	0:57,0:72,0:86	.:GG-WUR-108_GG-WUR-068_GG-WUR-154_GG-WUR-042_GG-WUR-114_GG-WUR-121_GG-WUR-156_GG-WUR-059_GG-WUR-113_GG-WUR-120_GG-WUR-117_GG-WUR-159_GG-WUR-258_GG-WUR-036_GG-WUR-162_GG-WUR-239_GG-WUR-051_GG-WUR-092_GG-WUR-163_GG-WUR-069_GG-WUR-115_GG-WUR-130_GG-WUR-236_GG-WUR-123_GG-WUR-055_GG-WUR-175_GG-WUR-050_GG-WUR-153_GG-WUR-118_GG-WUR-252_GG-WUR-111_GG-WUR-134_GG-WUR-119_GG-WUR-122_GG-WUR-088_GG-WUR-147_G…	-55	0|0|0	splice_acceptor_variant&non_coding_transcript_variant	HIGH	-	ENSGALG00000030956	ENSGALT00000059197	-	1/1	-	-	-	-	-	-	-	NA	-		-	YES
5	40858336	G	A	127891	246	492	492	1	492	0	WA_WD_W1	0:69,0:78,0:99	.:GG-WUR-108_GG-WUR-262_GG-WUR-068_GG-WUR-154_GG-WUR-042_GG-WUR-114_GG-WUR-121_GG-WUR-156_GG-WUR-059_GG-WUR-253_GG-WUR-116_GG-WUR-257_GG-WUR-113_GG-WUR-120_GG-WUR-117_GG-WUR-159_GG-WUR-258_GG-WUR-036_GG-WUR-162_GG-WUR-256_GG-WUR-239_GG-WUR-051_GG-WUR-092_GG-WUR-163_GG-WUR-069_GG-WUR-115_GG-WUR-130_GG-WUR-238_GG-WUR-123_GG-WUR-055_GG-WUR-263_GG-WUR-175_GG-WUR-050_GG-WUR-153_GG-WUR-118_GG-WUR-259_G…	29	56|18|0	missense_variant	MODERATE	TSHR	ENSGALG00000010572	ENSGALT00000017205	10/10	-	1706	1672	558	G/R	Gga/Aga	-	deleterious(0.01)	-6.867	1.20.1070.10&Pfam_domain:PF00001&Prints_domain:PR00373&PROSITE_profiles:PS50262&PTHR24372&PTHR24372:SF0&Superfamily_domains:SSF81321&Transmembrane_helices:TMhelix	integral component of plasma membrane [GO:0005887]; G-protein coupled peptide receptor activity [GO:0008528]; thyroid-stimulating hormone receptor activity [GO:0004996]; activation of adenylate cyclase activity [GO:0007190]; adenylate cyclase-activating G-protein coupled receptor signaling pathway [GO:0007189]; adult locomotory behavior [GO:0008344]; B cell differentiation [GO:0030183]; cochlea m…	skeleton,reproductive,immune,growth/size/body,endocrine/exocrine,limbs/digits/tail,hearing/vestibular/ear,vision/eye,hematopoietic,behavior,no abnormal phenotype observed,mortality/aging,nervous system,homeostasis	YES
5	44306836	G	C	120518	244	488	488	1	488	0	WA_WD_W1	0:69,0:78,0:97	.:GG-WUR-108_GG-WUR-262_GG-WUR-068_GG-WUR-154_GG-WUR-042_GG-WUR-114_GG-WUR-121_GG-WUR-156_GG-WUR-059_GG-WUR-253_GG-WUR-116_GG-WUR-261_GG-WUR-257_GG-WUR-113_GG-WUR-120_GG-WUR-117_GG-WUR-159_GG-WUR-258_GG-WUR-036_GG-WUR-162_GG-WUR-256_GG-WUR-239_GG-WUR-051_GG-WUR-092_GG-WUR-163_GG-WUR-069_GG-WUR-115_GG-WUR-130_GG-WUR-238_GG-WUR-236_GG-WUR-123_GG-WUR-055_GG-WUR-263_GG-WUR-175_GG-WUR-050_GG-WUR-153_G…	3351	52|12|0	missense_variant	MODERATE	CCDC88C	ENSGALG00000040156	ENSGALT00000060808	31/31	-	6516	6049	2017	P/A	Cct/Gct	-	tolerated(0.1)	-3.515	Low_complexity_(Seg):seg	Wnt signaling pathway [GO:0016055]Wnt signaling pathway [GO:0016055]Wnt signaling pathway [GO:0016055]Wnt signaling pathway [GO:0016055]	-	YES
5	48697585	CTTTTTTTTTA	CTTTTTTTTA	91660.6	236	472	472	1	472	0	WA_WD_W1	0:65,0:75,0:96	.:GG-WUR-108_GG-WUR-262_GG-WUR-068_GG-WUR-154_GG-WUR-042_GG-WUR-121_GG-WUR-156_GG-WUR-059_GG-WUR-253_GG-WUR-116_GG-WUR-257_GG-WUR-113_GG-WUR-120_GG-WUR-117_GG-WUR-159_GG-WUR-258_GG-WUR-036_GG-WUR-162_GG-WUR-256_GG-WUR-239_GG-WUR-051_GG-WUR-092_GG-WUR-163_GG-WUR-069_GG-WUR-130_GG-WUR-236_GG-WUR-123_GG-WUR-055_GG-WUR-263_GG-WUR-175_GG-WUR-050_GG-WUR-153_GG-WUR-118_GG-WUR-259_GG-WUR-252_GG-WUR-111_G…	95	58|5|0	splice_acceptor_variant&intron_variant	HIGH	-	ENSGALG00000028897	ENSGALT00000042737	-	2/6	-	-	-	-	-	-	-	NA	-	-	-	NO
5	48915227	A	G	97139.7	231	462	462	1	462	0	WA_WD_W1	0:61,0:77,0:93	.:GG-WUR-108_GG-WUR-068_GG-WUR-154_GG-WUR-042_GG-WUR-114_GG-WUR-121_GG-WUR-156_GG-WUR-059_GG-WUR-116_GG-WUR-261_GG-WUR-113_GG-WUR-120_GG-WUR-117_GG-WUR-159_GG-WUR-258_GG-WUR-036_GG-WUR-162_GG-WUR-239_GG-WUR-051_GG-WUR-092_GG-WUR-163_GG-WUR-069_GG-WUR-115_GG-WUR-130_GG-WUR-236_GG-WUR-123_GG-WUR-055_GG-WUR-263_GG-WUR-175_GG-WUR-050_GG-WUR-153_GG-WUR-118_GG-WUR-111_GG-WUR-134_GG-WUR-119_GG-WUR-122_G…	-77	0|0|0	splice_donor_variant&non_coding_transcript_variant	HIGH	-	ENSGALG00000031815	ENSGALT00000054338	-	1/3	-	-	-	-	-	-	-	NA	-		-	YES
5	49497808	A	T	113390	232	464	464	1	464	0	WA_WD_W1	0:62,0:74,0:96	.:GG-WUR-108_GG-WUR-262_GG-WUR-068_GG-WUR-154_GG-WUR-042_GG-WUR-114_GG-WUR-121_GG-WUR-156_GG-WUR-059_GG-WUR-253_GG-WUR-116_GG-WUR-257_GG-WUR-113_GG-WUR-120_GG-WUR-117_GG-WUR-159_GG-WUR-036_GG-WUR-162_GG-WUR-239_GG-WUR-051_GG-WUR-092_GG-WUR-163_GG-WUR-069_GG-WUR-115_GG-WUR-130_GG-WUR-238_GG-WUR-123_GG-WUR-055_GG-WUR-175_GG-WUR-050_GG-WUR-153_GG-WUR-118_GG-WUR-259_GG-WUR-111_GG-WUR-134_GG-WUR-119_G…	1108	57|15|0	missense_variant	MODERATE	PPP2R5C	ENSGALG00000029996	ENSGALT00000063660	11/14	-	1323	1250	417	Q/L	cAg/cTg	-	tolerated(0.22)	-3.549	Low_complexity_(Seg):seg&PTHR10257&PTHR10257:SF22&PIRSF_domain:PIRSF028043&Pfam_domain:PF01603&Superfamily_domains:SSF48371&Coiled-coils_(Ncoils):Coil	protein phosphatase type 2A complex [GO:0000159]; protein phosphatase regulator activity [GO:0019888]; signal transduction [GO:0007165]	behavior,growth/size/body,adipose,cellular,mortality/aging,integument,muscle,cardiovascular	NO
5	49552817	G	T	116003	238	476	476	1	476	0	WA_WD_W1	0:66,0:75,0:97	.:GG-WUR-108_GG-WUR-262_GG-WUR-068_GG-WUR-154_GG-WUR-042_GG-WUR-114_GG-WUR-121_GG-WUR-156_GG-WUR-059_GG-WUR-253_GG-WUR-116_GG-WUR-261_GG-WUR-257_GG-WUR-113_GG-WUR-120_GG-WUR-117_GG-WUR-159_GG-WUR-036_GG-WUR-162_GG-WUR-239_GG-WUR-051_GG-WUR-092_GG-WUR-163_GG-WUR-069_GG-WUR-115_GG-WUR-130_GG-WUR-238_GG-WUR-236_GG-WUR-123_GG-WUR-055_GG-WUR-263_GG-WUR-175_GG-WUR-050_GG-WUR-153_GG-WUR-118_GG-WUR-259_G…	593	34|0|0	missense_variant	MODERATE	DYNC1H1	ENSGALG00000011330	ENSGALT00000055697	4/4	-	546	546	182	W/C	tgG/tgT	-	deleterious_low_confidence(0)	-0.72	-	dynein complex [GO:0030286]; ATP binding [GO:0005524]; ATPase activity [GO:0016887]; microtubule motor activity [GO:0003777]; microtubule-based movement [GO:0007018]dynein complex [GO:0030286]; microtubule motor activity [GO:0003777]; microtubule-based movement [GO:0007018]dynein complex [GO:0030286]; ATP binding [GO:0005524]; ATPase activity [GO:0016887]; microtubule motor activity [GO:0003777];…	nervous system,reproductive,growth/size/body,behavior,mortality/aging,muscle	YES
5	52953418	GT	TC	88268.8	227	454	454	1	454	0	WA_WD_W1	0:65,0:72,0:90	.:GG-WUR-108_GG-WUR-262_GG-WUR-068_GG-WUR-154_GG-WUR-042_GG-WUR-114_GG-WUR-121_GG-WUR-156_GG-WUR-059_GG-WUR-253_GG-WUR-116_GG-WUR-261_GG-WUR-257_GG-WUR-113_GG-WUR-120_GG-WUR-117_GG-WUR-159_GG-WUR-258_GG-WUR-036_GG-WUR-162_GG-WUR-256_GG-WUR-239_GG-WUR-051_GG-WUR-092_GG-WUR-163_GG-WUR-069_GG-WUR-130_GG-WUR-238_GG-WUR-123_GG-WUR-055_GG-WUR-263_GG-WUR-175_GG-WUR-153_GG-WUR-118_GG-WUR-259_GG-WUR-252_G…	83193	34|5|2	missense_variant	MODERATE	HSPA2	ENSGALG00000011715	ENSGALT00000019144	1/1	-	1457-1458	1347-1348	449-450	ER/ES	gaACgt/gaGAgt	-	-	-4.688	PTHR19375&PTHR19375:SF216&2.60.34.10&Pfam_domain:PF00012&Superfamily_domains:SSF100920	ATP binding [GO:0005524]blood microparticle [GO:0072562]; CatSper complex [GO:0036128]; cell [GO:0005623]; cell surface [GO:0009986]; cytosol [GO:0005829]; extracellular exosome [GO:0070062]; extracellular space [GO:0005615]; focal adhesion [GO:0005925]; intracellular ribonucleoprotein complex [GO:0030529]; male germ cell nucleus [GO:0001673]; meiotic spindle [GO:0072687]; membrane [GO:0016020]; …	no abnormal phenotype observed,reproductive,endocrine/exocrine	NO
5	55169009	T	C	135489	249	498	498	1	498	0	WA_WD_W1	0:71,0:77,0:101	.:GG-WUR-108_GG-WUR-262_GG-WUR-068_GG-WUR-154_GG-WUR-042_GG-WUR-114_GG-WUR-121_GG-WUR-156_GG-WUR-059_GG-WUR-253_GG-WUR-116_GG-WUR-261_GG-WUR-257_GG-WUR-113_GG-WUR-120_GG-WUR-117_GG-WUR-159_GG-WUR-258_GG-WUR-036_GG-WUR-162_GG-WUR-256_GG-WUR-239_GG-WUR-051_GG-WUR-092_GG-WUR-163_GG-WUR-069_GG-WUR-115_GG-WUR-130_GG-WUR-238_GG-WUR-236_GG-WUR-123_GG-WUR-055_GG-WUR-263_GG-WUR-175_GG-WUR-050_GG-WUR-153_G…	-52	0|0|0	splice_acceptor_variant&non_coding_transcript_variant	HIGH	-	ENSGALG00000043469	ENSGALT00000059606	-	2/2	-	-	-	-	-	-	-	NA	-		-	YES
5	55308610	C	T	112118	242	483	484	0.997934	482	1	WA_WD_W1	0:67,0:77,1:97	.:GG-WUR-108_GG-WUR-262_GG-WUR-068_GG-WUR-154_GG-WUR-042_GG-WUR-114_GG-WUR-121_GG-WUR-156_GG-WUR-059_GG-WUR-253_GG-WUR-116_GG-WUR-261_GG-WUR-257_GG-WUR-113_GG-WUR-120_GG-WUR-117_GG-WUR-159_GG-WUR-036_GG-WUR-162_GG-WUR-239_GG-WUR-051_GG-WUR-092_GG-WUR-163_GG-WUR-069_GG-WUR-115_GG-WUR-130_GG-WUR-238_GG-WUR-123_GG-WUR-055_GG-WUR-263_GG-WUR-175_GG-WUR-050_GG-WUR-153_GG-WUR-118_GG-WUR-259_GG-WUR-252_G…	998	57|9|0	missense_variant	MODERATE	KIAA0586	ENSGALG00000012025	ENSGALT00000037343	23/30	-	3545	3409	1137	V/M	Gtg/Atg	1	deleterious(0.03)	-1.468	Low_complexity_(Seg):seg&PTHR15721:SF2&PTHR15721&Pfam_domain:PF15324	centriole [GO:0005814]; centrosome [GO:0005813]; ciliary basal body [GO:0036064]; cytoplasm [GO:0005737]; centrosome localization [GO:0051642]; cilium assembly [GO:0060271]; motile cilium assembly [GO:0044458]; regulation of establishment of protein localization [GO:0070201]; smoothened signaling pathway [GO:0007224]	embryo,skeleton,craniofacial,limbs/digits/tail,cellular,mortality/aging,nervous system,growth/size/body,homeostasis,cardiovascular	YES
5	55310163	G	A	100471	240	480	480	1	480	0	WA_WD_W1	0:68,0:75,0:97	.:GG-WUR-108_GG-WUR-262_GG-WUR-068_GG-WUR-154_GG-WUR-042_GG-WUR-121_GG-WUR-156_GG-WUR-059_GG-WUR-253_GG-WUR-116_GG-WUR-261_GG-WUR-257_GG-WUR-113_GG-WUR-120_GG-WUR-117_GG-WUR-159_GG-WUR-258_GG-WUR-036_GG-WUR-162_GG-WUR-239_GG-WUR-051_GG-WUR-092_GG-WUR-163_GG-WUR-069_GG-WUR-115_GG-WUR-130_GG-WUR-238_GG-WUR-236_GG-WUR-123_GG-WUR-055_GG-WUR-263_GG-WUR-175_GG-WUR-050_GG-WUR-153_GG-WUR-118_GG-WUR-259_G…	786	57|9|0	missense_variant	MODERATE	KIAA0586	ENSGALG00000012025	ENSGALT00000037343	21/30	-	3312	3176	1059	T/I	aCa/aTa	1	deleterious(0.04)	-0.91	PTHR15721:SF2&PTHR15721&Pfam_domain:PF15324	centriole [GO:0005814]; centrosome [GO:0005813]; ciliary basal body [GO:0036064]; cytoplasm [GO:0005737]; centrosome localization [GO:0051642]; cilium assembly [GO:0060271]; motile cilium assembly [GO:0044458]; regulation of establishment of protein localization [GO:0070201]; smoothened signaling pathway [GO:0007224]	embryo,skeleton,craniofacial,limbs/digits/tail,cellular,mortality/aging,nervous system,growth/size/body,homeostasis,cardiovascular	YES
5	55450855	G	T	140671	242	463	484	0.956612	442	21	WA_WD_W1	9:60,0:75,12:86	GG-WUR-154_GG-WUR-121_GG-WUR-116_GG-WUR-120_GG-WUR-115_GG-WUR-111_GG-WUR-254_GG-WUR-088_GG-WUR-255:GG-WUR-108_GG-WUR-262_GG-WUR-068_GG-WUR-042_GG-WUR-114_GG-WUR-156_GG-WUR-059_GG-WUR-253_GG-WUR-261_GG-WUR-257_GG-WUR-113_GG-WUR-117_GG-WUR-159_GG-WUR-258_GG-WUR-036_GG-WUR-162_GG-WUR-256_GG-WUR-239_GG-WUR-051_GG-WUR-163_GG-WUR-069_GG-WUR-130_GG-WUR-238_GG-WUR-236_GG-WUR-123_GG-WUR-055_GG-WUR-263_GG-…	1515	54|2|0	missense_variant	MODERATE	C14orf37	ENSGALG00000012089	ENSGALT00000019746	1/8	-	674	674	225	S/I	aGt/aTt	-	deleterious(0.01)	-2.012	PTHR21585:SF0&PTHR21585&Pfam_domain:PF15767	integral component of membrane [GO:0016021]	-	YES
5	58052021	T	G	121972	248	495	496	0.997984	494	1	WA_WD_W1	1:68,0:78,0:101	GG-WUR-039:GG-WUR-108_GG-WUR-262_GG-WUR-068_GG-WUR-154_GG-WUR-042_GG-WUR-114_GG-WUR-121_GG-WUR-156_GG-WUR-059_GG-WUR-253_GG-WUR-116_GG-WUR-261_GG-WUR-257_GG-WUR-113_GG-WUR-120_GG-WUR-117_GG-WUR-159_GG-WUR-258_GG-WUR-036_GG-WUR-162_GG-WUR-256_GG-WUR-239_GG-WUR-051_GG-WUR-092_GG-WUR-163_GG-WUR-069_GG-WUR-115_GG-WUR-130_GG-WUR-238_GG-WUR-236_GG-WUR-123_GG-WUR-055_GG-WUR-263_GG-WUR-175_GG-WUR-050_GG-…	266	61|6|0	missense_variant	MODERATE	NIN	ENSGALG00000012361	ENSGALT00000020190	13/18	-	3740	3740	1247	H/P	cAt/cCt	-	tolerated(0.21)	-3.051	PTHR18905&PTHR18905:SF11	centriole [GO:0005814]; ciliary transition fiber [GO:0097539]; microtubule minus-end [GO:0036449]; mitotic spindle pole [GO:0097431]; nucleolus [GO:0005730]; pericentriolar material [GO:0000242]; centrosome localization [GO:0051642]; centrosome-templated microtubule nucleation [GO:0090222]; microtubule anchoring at centrosome [GO:0034454]	hearing/vestibular/ear,nervous system,behavior,cardiovascular	YES
5	58054237	A	G	105791	246	485	492	0.985772	478	7	WA_WD_W1	0:69,0:78,7:92	.:GG-WUR-108_GG-WUR-262_GG-WUR-068_GG-WUR-154_GG-WUR-042_GG-WUR-114_GG-WUR-121_GG-WUR-156_GG-WUR-059_GG-WUR-253_GG-WUR-116_GG-WUR-261_GG-WUR-257_GG-WUR-113_GG-WUR-120_GG-WUR-117_GG-WUR-159_GG-WUR-258_GG-WUR-036_GG-WUR-162_GG-WUR-256_GG-WUR-239_GG-WUR-051_GG-WUR-092_GG-WUR-069_GG-WUR-115_GG-WUR-130_GG-WUR-238_GG-WUR-236_GG-WUR-123_GG-WUR-055_GG-WUR-263_GG-WUR-175_GG-WUR-050_GG-WUR-153_GG-WUR-118_G…	286	61|6|0	missense_variant	MODERATE	NIN	ENSGALG00000012361	ENSGALT00000020190	10/18	-	3442	3442	1148	C/R	Tgt/Cgt	-	deleterious(0)	-9.431	PTHR18905&PTHR18905:SF11&Coiled-coils_(Ncoils):Coil	centriole [GO:0005814]; ciliary transition fiber [GO:0097539]; microtubule minus-end [GO:0036449]; mitotic spindle pole [GO:0097431]; nucleolus [GO:0005730]; pericentriolar material [GO:0000242]; centrosome localization [GO:0051642]; centrosome-templated microtubule nucleation [GO:0090222]; microtubule anchoring at centrosome [GO:0034454]	hearing/vestibular/ear,nervous system,behavior,cardiovascular	YES
5	58240588	G	A	130899	226	445	452	0.984513	438	7	WA_WD_W1	0:58,0:76,7:85	.:GG-WUR-108_GG-WUR-068_GG-WUR-154_GG-WUR-042_GG-WUR-114_GG-WUR-121_GG-WUR-156_GG-WUR-059_GG-WUR-116_GG-WUR-257_GG-WUR-113_GG-WUR-120_GG-WUR-117_GG-WUR-159_GG-WUR-258_GG-WUR-036_GG-WUR-162_GG-WUR-051_GG-WUR-092_GG-WUR-163_GG-WUR-069_GG-WUR-115_GG-WUR-238_GG-WUR-123_GG-WUR-055_GG-WUR-175_GG-WUR-050_GG-WUR-153_GG-WUR-111_GG-WUR-134_GG-WUR-119_GG-WUR-122_GG-WUR-088_GG-WUR-147_GG-WUR-090_GG-WUR-096_G…	2703	60|9|0	missense_variant	MODERATE	NID2	ENSGALG00000012394	ENSGALT00000020241	3/22	-	577	577	193	R/W	Cgg/Tgg	-	deleterious(0.02)	-7.304	PROSITE_profiles:PS51220&Pfam_domain:PF06119&SMART_domains:SM00539	basement membrane [GO:0005604]; extracellular exosome [GO:0070062]; extracellular space [GO:0005615]; calcium ion binding [GO:0005509]; cell-matrix adhesion [GO:0007160]	immune,skeleton	YES
5	58359683	A	C	128591	247	494	494	1	494	0	WA_WD_W1	0:71,0:77,0:99	.:GG-WUR-108_GG-WUR-262_GG-WUR-068_GG-WUR-154_GG-WUR-042_GG-WUR-114_GG-WUR-121_GG-WUR-156_GG-WUR-059_GG-WUR-253_GG-WUR-116_GG-WUR-261_GG-WUR-257_GG-WUR-113_GG-WUR-120_GG-WUR-117_GG-WUR-159_GG-WUR-258_GG-WUR-036_GG-WUR-162_GG-WUR-256_GG-WUR-239_GG-WUR-051_GG-WUR-092_GG-WUR-163_GG-WUR-069_GG-WUR-115_GG-WUR-130_GG-WUR-238_GG-WUR-236_GG-WUR-123_GG-WUR-055_GG-WUR-263_GG-WUR-175_GG-WUR-050_GG-WUR-153_G…	6496	59|20|0	splice_acceptor_variant	HIGH	PSMC6	ENSGALG00000012408	ENSGALT00000020277	-	8/15	-	-	-	-	-	-	-	NA	-	cytoplasm [GO:0005737]; ATP binding [GO:0005524]; hydrolase activity [GO:0016787]; protein catabolic process [GO:0030163]cytoplasm [GO:0005737]; proteasome accessory complex [GO:0022624]; ATP binding [GO:0005524]; hydrolase activity [GO:0016787]; protein catabolic process [GO:0030163]cytosolic proteasome complex [GO:0031597]; nuclear proteasome complex [GO:0031595]; proteasome regulatory particle…	-	YES
5	58954670	T	C	103464	241	482	482	1	482	0	WA_WD_W1	0:67,0:77,0:97	.:GG-WUR-108_GG-WUR-068_GG-WUR-154_GG-WUR-042_GG-WUR-114_GG-WUR-121_GG-WUR-156_GG-WUR-059_GG-WUR-253_GG-WUR-116_GG-WUR-257_GG-WUR-113_GG-WUR-120_GG-WUR-117_GG-WUR-159_GG-WUR-258_GG-WUR-036_GG-WUR-162_GG-WUR-239_GG-WUR-051_GG-WUR-092_GG-WUR-163_GG-WUR-069_GG-WUR-115_GG-WUR-130_GG-WUR-238_GG-WUR-236_GG-WUR-123_GG-WUR-055_GG-WUR-175_GG-WUR-050_GG-WUR-153_GG-WUR-118_GG-WUR-259_GG-WUR-252_GG-WUR-111_G…	1815	59|9|0	missense_variant	MODERATE	-	ENSGALG00000034773	ENSGALT00000076624	9/12	-	1231	1219	407	S/G	Agt/Ggt	-	tolerated(0.65)	-2.51	PTHR21567&PTHR21567:SF6	-	-	YES
5	59212517	G	A	139075	248	496	496	1	496	0	WA_WD_W1	0:71,0:78,0:99	.:GG-WUR-108_GG-WUR-262_GG-WUR-068_GG-WUR-154_GG-WUR-042_GG-WUR-114_GG-WUR-121_GG-WUR-156_GG-WUR-059_GG-WUR-253_GG-WUR-116_GG-WUR-261_GG-WUR-257_GG-WUR-113_GG-WUR-120_GG-WUR-117_GG-WUR-159_GG-WUR-258_GG-WUR-036_GG-WUR-162_GG-WUR-256_GG-WUR-239_GG-WUR-051_GG-WUR-092_GG-WUR-163_GG-WUR-069_GG-WUR-115_GG-WUR-130_GG-WUR-238_GG-WUR-236_GG-WUR-123_GG-WUR-055_GG-WUR-263_GG-WUR-175_GG-WUR-050_GG-WUR-153_G…	-92	0|0|0	splice_acceptor_variant&non_coding_transcript_variant	HIGH	-	ENSGALG00000043056	ENSGALT00000060867	-	1/6	-	-	-	-	-	-	-	NA	-		-	YES
6	5125629	A	C	102453	247	494	494	1	494	0	WA_WD_W1	0:70,0:77,0:100	.:GG-WUR-108_GG-WUR-262_GG-WUR-068_GG-WUR-154_GG-WUR-042_GG-WUR-114_GG-WUR-121_GG-WUR-156_GG-WUR-059_GG-WUR-253_GG-WUR-116_GG-WUR-261_GG-WUR-257_GG-WUR-113_GG-WUR-120_GG-WUR-117_GG-WUR-159_GG-WUR-036_GG-WUR-162_GG-WUR-256_GG-WUR-239_GG-WUR-051_GG-WUR-092_GG-WUR-163_GG-WUR-069_GG-WUR-115_GG-WUR-130_GG-WUR-238_GG-WUR-236_GG-WUR-123_GG-WUR-055_GG-WUR-263_GG-WUR-175_GG-WUR-050_GG-WUR-153_GG-WUR-118_G…	1497	23|2|0	missense_variant	MODERATE	-	ENSGALG00000002638	ENSGALT00000079356	8/8	-	1341	1193	398	I/S	aTc/aGc	-	deleterious(0)	-3.278	3.40.50.1100	cytoplasm [GO:0005737]; integral component of membrane [GO:0016021]; amino acid binding [GO:0016597]; L-serine ammonia-lyase activity [GO:0003941]; L-threonine ammonia-lyase activity [GO:0004794]; pyridoxal phosphate binding [GO:0030170]; L-serine catabolic process [GO:0006565]; threonine catabolic process [GO:0006567]	-	YES
6	5278503	C	T	134025	244	488	488	1	488	0	WA_WD_W1	0:69,0:77,0:98	.:GG-WUR-108_GG-WUR-068_GG-WUR-154_GG-WUR-042_GG-WUR-114_GG-WUR-121_GG-WUR-156_GG-WUR-059_GG-WUR-253_GG-WUR-116_GG-WUR-261_GG-WUR-257_GG-WUR-113_GG-WUR-120_GG-WUR-117_GG-WUR-159_GG-WUR-258_GG-WUR-036_GG-WUR-162_GG-WUR-256_GG-WUR-239_GG-WUR-051_GG-WUR-092_GG-WUR-163_GG-WUR-069_GG-WUR-115_GG-WUR-130_GG-WUR-236_GG-WUR-123_GG-WUR-055_GG-WUR-263_GG-WUR-175_GG-WUR-050_GG-WUR-153_GG-WUR-118_GG-WUR-259_G…	3131	60|9|0	missense_variant	MODERATE	IPMK	ENSGALG00000002710	ENSGALT00000004276	4/6	-	654	434	145	T/M	aCg/aTg	-	deleterious(0.03)	0.641	PTHR12400&PTHR12400:SF51&Superfamily_domains:SSF56104	nucleolus [GO:0005730]; nucleoplasm [GO:0005654]; inositol tetrakisphosphate 3-kinase activity [GO:0000824]; inositol-1,4,5-trisphosphate 3-kinase activity [GO:0008440]; inositol phosphate biosynthetic process [GO:0032958]; neural tube formation [GO:0001841]	embryo,mortality/aging,growth/size/body,nervous system	YES
6	8274276	C	A	115481	242	482	484	0.995868	480	2	WA_WD_W1	2:65,0:77,0:98	GG-WUR-111_GG-WUR-035:GG-WUR-108_GG-WUR-262_GG-WUR-068_GG-WUR-154_GG-WUR-042_GG-WUR-114_GG-WUR-121_GG-WUR-156_GG-WUR-059_GG-WUR-253_GG-WUR-116_GG-WUR-257_GG-WUR-113_GG-WUR-120_GG-WUR-117_GG-WUR-159_GG-WUR-036_GG-WUR-162_GG-WUR-256_GG-WUR-239_GG-WUR-051_GG-WUR-092_GG-WUR-163_GG-WUR-069_GG-WUR-115_GG-WUR-130_GG-WUR-238_GG-WUR-123_GG-WUR-055_GG-WUR-263_GG-WUR-175_GG-WUR-050_GG-WUR-153_GG-WUR-118_GG-…	691	63|3|0	missense_variant	MODERATE	RTKN2	ENSGALG00000002980	ENSGALT00000004715	12/12	-	1626	1626	542	H/Q	caC/caA	-	deleterious(0.05)	1	-	hemopoiesis [GO:0030097]; signal transduction [GO:0007165]hemopoiesis [GO:0030097]hemopoiesis [GO:0030097]	-	YES
6	8299631	G	A	110157	247	488	494	0.987854	482	6	WA_WD_W1	2:67,0:78,4:96	GG-WUR-111_GG-WUR-035:GG-WUR-108_GG-WUR-262_GG-WUR-068_GG-WUR-154_GG-WUR-042_GG-WUR-114_GG-WUR-121_GG-WUR-156_GG-WUR-059_GG-WUR-253_GG-WUR-116_GG-WUR-261_GG-WUR-113_GG-WUR-120_GG-WUR-117_GG-WUR-159_GG-WUR-258_GG-WUR-036_GG-WUR-162_GG-WUR-256_GG-WUR-239_GG-WUR-051_GG-WUR-092_GG-WUR-163_GG-WUR-069_GG-WUR-115_GG-WUR-130_GG-WUR-238_GG-WUR-236_GG-WUR-123_GG-WUR-055_GG-WUR-263_GG-WUR-175_GG-WUR-050_GG-…	1859	61|2|0	missense_variant	MODERATE	ARID5B	ENSGALG00000031534	ENSGALT00000053154	10/10	-	2365	2356	786	R/C	Cgc/Tgc	-	deleterious(0)	-1.835	PTHR13964&PTHR13964:SF29	nucleus [GO:0005634]; DNA binding [GO:0003677]; regulation of transcription, DNA-templated [GO:0006355]	skeleton,reproductive,craniofacial,adipose,endocrine/exocrine,limbs/digits/tail,immune,renal/urinary,hematopoietic,cellular,behavior,mortality/aging,muscle,growth/size/body,homeostasis,digestive/alimentary	YES
6	10560472	G	A	65783	212	424	424	1	424	0	WA_WD_W1	0:58,0:68,0:86	.:GG-WUR-108_GG-WUR-262_GG-WUR-068_GG-WUR-154_GG-WUR-042_GG-WUR-114_GG-WUR-121_GG-WUR-156_GG-WUR-059_GG-WUR-253_GG-WUR-116_GG-WUR-113_GG-WUR-120_GG-WUR-159_GG-WUR-258_GG-WUR-036_GG-WUR-162_GG-WUR-256_GG-WUR-239_GG-WUR-051_GG-WUR-092_GG-WUR-163_GG-WUR-069_GG-WUR-115_GG-WUR-130_GG-WUR-238_GG-WUR-236_GG-WUR-123_GG-WUR-055_GG-WUR-263_GG-WUR-175_GG-WUR-050_GG-WUR-153_GG-WUR-118_GG-WUR-259_GG-WUR-254_G…	-46	53|13|0	splice_donor_variant	HIGH	PBLD	ENSGALG00000003935	ENSGALT00000078109	-	1/8	-	-	-	-	-	-	-	NA	-	catalytic activity [GO:0003824]; biosynthetic process [GO:0009058]cytoplasm [GO:0005737]; extracellular exosome [GO:0070062]; catalytic activity [GO:0003824]; biosynthetic process [GO:0009058]; maintenance of gastrointestinal epithelium [GO:0030277]; negative regulation of epithelial cell migration [GO:0010633]; negative regulation of epithelial cell proliferation [GO:0050680]; negative regulatio…	-	YES
6	12252226	ATA	ATTA	109566	248	494	496	0.995968	492	2	WA_WD_W1	1:69,0:78,1:99	GG-WUR-055:GG-WUR-108_GG-WUR-262_GG-WUR-068_GG-WUR-154_GG-WUR-042_GG-WUR-114_GG-WUR-121_GG-WUR-156_GG-WUR-059_GG-WUR-253_GG-WUR-116_GG-WUR-261_GG-WUR-257_GG-WUR-113_GG-WUR-120_GG-WUR-117_GG-WUR-159_GG-WUR-258_GG-WUR-036_GG-WUR-162_GG-WUR-256_GG-WUR-239_GG-WUR-051_GG-WUR-092_GG-WUR-163_GG-WUR-069_GG-WUR-115_GG-WUR-130_GG-WUR-238_GG-WUR-236_GG-WUR-123_GG-WUR-263_GG-WUR-175_GG-WUR-050_GG-WUR-153_GG-…	2281	45|25|2	splice_donor_variant	HIGH	PPIF	ENSGALG00000004809	ENSGALT00000007678	-	3/5	-	-	-	-	-	-	-	NA	-	peptidyl-prolyl cis-trans isomerase activity [GO:0003755]; protein folding [GO:0006457]mitochondrion [GO:0005739]; peptidyl-prolyl cis-trans isomerase activity [GO:0003755]; apoptotic mitochondrial changes [GO:0008637]; cellular response to arsenic-containing substance [GO:0071243]; cellular response to calcium ion [GO:0071277]; cellular response to hydrogen peroxide [GO:0070301]; necroptotic pro…	nervous system,homeostasis,cellular,cardiovascular	YES
6	16776123	A	T	73969.2	226	452	452	1	452	0	WA_WD_W1	0:65,0:71,0:90	.:GG-WUR-108_GG-WUR-262_GG-WUR-068_GG-WUR-154_GG-WUR-042_GG-WUR-114_GG-WUR-121_GG-WUR-156_GG-WUR-059_GG-WUR-253_GG-WUR-116_GG-WUR-261_GG-WUR-257_GG-WUR-113_GG-WUR-120_GG-WUR-117_GG-WUR-159_GG-WUR-036_GG-WUR-256_GG-WUR-239_GG-WUR-051_GG-WUR-092_GG-WUR-163_GG-WUR-069_GG-WUR-130_GG-WUR-238_GG-WUR-123_GG-WUR-055_GG-WUR-263_GG-WUR-175_GG-WUR-050_GG-WUR-153_GG-WUR-259_GG-WUR-252_GG-WUR-111_GG-WUR-254_G…	941	61|12|0	missense_variant	MODERATE	NOLC1	ENSGALG00000041124	ENSGALT00000052165	6/11	-	815	815	272	K/I	aAa/aTa	-	deleterious_low_confidence(0)	-0.617	-	-	-	YES
6	16942657	GTT	GT	99445.7	239	478	478	1	478	0	WA_WD_W1	0:69,0:77,0:93	.:GG-WUR-108_GG-WUR-262_GG-WUR-068_GG-WUR-154_GG-WUR-042_GG-WUR-114_GG-WUR-121_GG-WUR-156_GG-WUR-059_GG-WUR-253_GG-WUR-116_GG-WUR-261_GG-WUR-257_GG-WUR-113_GG-WUR-120_GG-WUR-117_GG-WUR-159_GG-WUR-258_GG-WUR-036_GG-WUR-162_GG-WUR-256_GG-WUR-239_GG-WUR-051_GG-WUR-092_GG-WUR-163_GG-WUR-069_GG-WUR-115_GG-WUR-130_GG-WUR-238_GG-WUR-236_GG-WUR-123_GG-WUR-055_GG-WUR-263_GG-WUR-175_GG-WUR-050_GG-WUR-153_G…	550	55|10|0	splice_donor_variant&intron_variant	HIGH	NFKB2	ENSGALG00000005653	ENSGALT00000009068	-	16/20	-	-	-	-	-	-	-	NA	-	Bcl3/NF-kappaB2 complex [GO:0033257]; cytoplasm [GO:0005737]; nucleoplasm [GO:0005654]; RNA polymerase II core promoter proximal region sequence-specific DNA binding [GO:0000978]; transcriptional activator activity, RNA polymerase II core promoter proximal region sequence-specific binding [GO:0001077]; extracellular matrix organization [GO:0030198]; follicular dendritic cell differentiation [GO:0…	respiratory,skeleton,reproductive,growth/size/body,endocrine/exocrine,liver/biliary,immune,cellular,behavior,mortality/aging,integument,hematopoietic,digestive/alimentary	NO
6	19267986	T	C	89328.7	230	454	460	0.986957	448	6	WA_WD_W1	0:62,5:69,1:93	.:GG-WUR-108_GG-WUR-262_GG-WUR-068_GG-WUR-154_GG-WUR-042_GG-WUR-114_GG-WUR-121_GG-WUR-156_GG-WUR-059_GG-WUR-116_GG-WUR-261_GG-WUR-113_GG-WUR-120_GG-WUR-117_GG-WUR-159_GG-WUR-258_GG-WUR-036_GG-WUR-162_GG-WUR-256_GG-WUR-051_GG-WUR-092_GG-WUR-163_GG-WUR-069_GG-WUR-115_GG-WUR-130_GG-WUR-236_GG-WUR-123_GG-WUR-055_GG-WUR-175_GG-WUR-050_GG-WUR-153_GG-WUR-118_GG-WUR-252_GG-WUR-111_GG-WUR-134_GG-WUR-119_G…	4429	54|2|0	missense_variant	MODERATE	FAS	ENSGALG00000006351	ENSGALT00000039919	8/8	-	903	838	280	C/R	Tgt/Cgt	-	tolerated(0.68)	-4.635	PROSITE_profiles:PS50017&PTHR23097&PTHR23097:SF114&Pfam_domain:PF00531&1.10.533.10&Superfamily_domains:SSF47986	CD95 death-inducing signaling complex [GO:0031265]; cell surface [GO:0009986]; cytoplasm [GO:0005737]; extracellular exosome [GO:0070062]; integral component of plasma membrane [GO:0005887]; membrane raft [GO:0045121]; nucleus [GO:0005634]; tumor necrosis factor-activated receptor activity [GO:0005031]; apoptotic signaling pathway [GO:0097190]; cellular response to hyperoxia [GO:0071455]; cellula…	embryo,skeleton,growth/size/body,endocrine/exocrine,liver/biliary,integument,homeostasis,cardiovascular,immune,limbs/digits/tail,hearing/vestibular/ear,neoplasm,mortality/aging,pigmentation,respiratory,vision/eye,cellular,nervous system,reproductive,adipose,renal/urinary,behavior,no abnormal phenotype observed,muscle,hematopoietic,digestive/alimentary	YES
6	20753452	GC	GCTAC	84455.4	231	447	462	0.967532	432	15	WA_WD_W1	3:59,8:68,4:89	GG-WUR-050_GG-WUR-119_GG-WUR-096:GG-WUR-108_GG-WUR-068_GG-WUR-154_GG-WUR-042_GG-WUR-114_GG-WUR-121_GG-WUR-156_GG-WUR-059_GG-WUR-253_GG-WUR-116_GG-WUR-261_GG-WUR-257_GG-WUR-113_GG-WUR-120_GG-WUR-117_GG-WUR-159_GG-WUR-258_GG-WUR-036_GG-WUR-162_GG-WUR-256_GG-WUR-239_GG-WUR-051_GG-WUR-092_GG-WUR-163_GG-WUR-069_GG-WUR-115_GG-WUR-130_GG-WUR-238_GG-WUR-236_GG-WUR-123_GG-WUR-055_GG-WUR-175_GG-WUR-153_GG-…	2202	61|20|0	inframe_insertion	MODERATE	IDE	ENSGALG00000038924	ENSGALT00000056288	4/25	-	943	623	208	A/AT	gCt/gCTACt	-	-	1	PTHR11851&PTHR11851:SF155&3.30.830.10&Superfamily_domains:SSF63411	metal ion binding [GO:0046872]; metalloendopeptidase activity [GO:0004222]	skeleton,craniofacial,adipose,integument,nervous system,growth/size/body,homeostasis,cardiovascular	NO
6	20770572	GTTTTTTA	GTTTTTA	82586.1	225	432	450	0.96	416	16	WA_WD_W1	0:55,4:71,12:82	.:GG-WUR-108_GG-WUR-068_GG-WUR-154_GG-WUR-042_GG-WUR-114_GG-WUR-121_GG-WUR-156_GG-WUR-059_GG-WUR-113_GG-WUR-120_GG-WUR-159_GG-WUR-036_GG-WUR-162_GG-WUR-256_GG-WUR-239_GG-WUR-051_GG-WUR-092_GG-WUR-069_GG-WUR-130_GG-WUR-238_GG-WUR-123_GG-WUR-055_GG-WUR-175_GG-WUR-050_GG-WUR-153_GG-WUR-118_GG-WUR-111_GG-WUR-134_GG-WUR-119_GG-WUR-122_GG-WUR-088_GG-WUR-147_GG-WUR-090_GG-WUR-096_GG-WUR-136_GG-WUR-240_G…	2995	61|20|0	splice_acceptor_variant&intron_variant	HIGH	IDE	ENSGALG00000038924	ENSGALT00000056288	-	11/24	-	-	-	-	-	-	-	NA	-	metal ion binding [GO:0046872]; metalloendopeptidase activity [GO:0004222]	skeleton,craniofacial,adipose,integument,nervous system,growth/size/body,homeostasis,cardiovascular	NO
6	22081988	G	A	107405	243	462	486	0.950617	446	16	WA_WD_W1	0:68,16:57,0:98	.:GG-WUR-108_GG-WUR-262_GG-WUR-068_GG-WUR-154_GG-WUR-042_GG-WUR-114_GG-WUR-121_GG-WUR-156_GG-WUR-059_GG-WUR-253_GG-WUR-116_GG-WUR-261_GG-WUR-257_GG-WUR-113_GG-WUR-120_GG-WUR-117_GG-WUR-159_GG-WUR-258_GG-WUR-036_GG-WUR-162_GG-WUR-239_GG-WUR-051_GG-WUR-092_GG-WUR-163_GG-WUR-069_GG-WUR-115_GG-WUR-130_GG-WUR-238_GG-WUR-123_GG-WUR-055_GG-WUR-263_GG-WUR-175_GG-WUR-050_GG-WUR-153_GG-WUR-118_GG-WUR-259_G…	833	58|6|6	missense_variant	MODERATE	ABCC2	ENSGALG00000007395	ENSGALT00000011965	2/32	-	285	170	57	S/F	tCc/tTc	-	tolerated(0.69)	-3.331	Low_complexity_(Seg):seg&PTHR24223&PTHR24223:SF258&Pfam_domain:PF16185&TIGRFAM_domain:TIGR00957	apical plasma membrane [GO:0016324]; cell surface [GO:0009986]; integral component of plasma membrane [GO:0005887]; intercellular canaliculus [GO:0046581]; ATP binding [GO:0005524]; ATPase activity, coupled to transmembrane movement of substances [GO:0042626]	liver/biliary,renal/urinary,homeostasis,hematopoietic,no abnormal phenotype observed	YES
6	23568273	A	G	152429	240	480	480	1	480	0	WA_WD_W1	0:69,0:77,0:94	.:GG-WUR-108_GG-WUR-262_GG-WUR-068_GG-WUR-154_GG-WUR-042_GG-WUR-114_GG-WUR-121_GG-WUR-156_GG-WUR-059_GG-WUR-253_GG-WUR-116_GG-WUR-261_GG-WUR-257_GG-WUR-113_GG-WUR-120_GG-WUR-117_GG-WUR-159_GG-WUR-258_GG-WUR-036_GG-WUR-162_GG-WUR-256_GG-WUR-239_GG-WUR-051_GG-WUR-092_GG-WUR-163_GG-WUR-069_GG-WUR-115_GG-WUR-130_GG-WUR-238_GG-WUR-236_GG-WUR-123_GG-WUR-055_GG-WUR-263_GG-WUR-175_GG-WUR-050_GG-WUR-153_G…	932	3|0|0	missense_variant	MODERATE	-	ENSGALG00000028238	ENSGALT00000046176	3/3	-	513	307	103	M/V	Atg/Gtg	-	deleterious_low_confidence(0.05)	-1.015	-	neurofilament [GO:0005883]; structural molecule activity [GO:0005198]; nervous system development [GO:0007399]	-	YES
6	23638884	TT	TCT	130707	248	496	496	1	496	0	WA_WD_W1	0:71,0:78,0:99	.:GG-WUR-108_GG-WUR-262_GG-WUR-068_GG-WUR-154_GG-WUR-042_GG-WUR-114_GG-WUR-121_GG-WUR-156_GG-WUR-059_GG-WUR-253_GG-WUR-116_GG-WUR-261_GG-WUR-257_GG-WUR-113_GG-WUR-120_GG-WUR-117_GG-WUR-159_GG-WUR-258_GG-WUR-036_GG-WUR-162_GG-WUR-256_GG-WUR-239_GG-WUR-051_GG-WUR-092_GG-WUR-163_GG-WUR-069_GG-WUR-115_GG-WUR-130_GG-WUR-238_GG-WUR-236_GG-WUR-123_GG-WUR-055_GG-WUR-263_GG-WUR-175_GG-WUR-050_GG-WUR-153_G…	387	50|26|2	frameshift_variant&stop_retained_variant	HIGH	CALHM2	ENSGALG00000008270	ENSGALT00000013462	2/2	-	960	960	320	*	taA/taAG	-	-	NA	-	integral component of plasma membrane [GO:0005887]; cation channel activity [GO:0005261]; ion transmembrane transport [GO:0034220]	-	YES
6	23800122	G	A	89221.5	247	457	494	0.925101	430	27	WA_WD_W1	0:71,27:45,0:99	.:GG-WUR-108_GG-WUR-262_GG-WUR-068_GG-WUR-154_GG-WUR-042_GG-WUR-114_GG-WUR-121_GG-WUR-156_GG-WUR-059_GG-WUR-253_GG-WUR-116_GG-WUR-261_GG-WUR-257_GG-WUR-113_GG-WUR-120_GG-WUR-117_GG-WUR-159_GG-WUR-258_GG-WUR-036_GG-WUR-162_GG-WUR-256_GG-WUR-239_GG-WUR-051_GG-WUR-092_GG-WUR-163_GG-WUR-069_GG-WUR-115_GG-WUR-130_GG-WUR-238_GG-WUR-236_GG-WUR-123_GG-WUR-055_GG-WUR-263_GG-WUR-175_GG-WUR-050_GG-WUR-153_G…	914	3|0|0	missense_variant	MODERATE	-	ENSGALG00000023565	ENSGALT00000031145	1/2	-	143	143	48	P/L	cCg/cTg	-	tolerated_low_confidence(1)	-10	Low_complexity_(Seg):seg	-	-	YES
6	31433942	CCCTCCTC	CCCTC	94858.1	245	490	490	1	490	0	WA_WD_W1	0:67,0:77,0:101	.:GG-WUR-108_GG-WUR-068_GG-WUR-154_GG-WUR-042_GG-WUR-114_GG-WUR-121_GG-WUR-156_GG-WUR-059_GG-WUR-253_GG-WUR-116_GG-WUR-261_GG-WUR-257_GG-WUR-113_GG-WUR-120_GG-WUR-117_GG-WUR-159_GG-WUR-258_GG-WUR-036_GG-WUR-162_GG-WUR-239_GG-WUR-051_GG-WUR-092_GG-WUR-163_GG-WUR-069_GG-WUR-115_GG-WUR-130_GG-WUR-238_GG-WUR-236_GG-WUR-123_GG-WUR-055_GG-WUR-263_GG-WUR-175_GG-WUR-050_GG-WUR-153_GG-WUR-118_GG-WUR-259_G…	1160	49|10|0	inframe_deletion	MODERATE	CUZD1	ENSGALG00000038254	ENSGALT00000062218	3/9	-	296-302	296-302	99-101	PSS/PS	cCCTCCTCa/cCCTCa	-	-	4.763	2.60.120.290&Pfam_domain:PF00431&PROSITE_profiles:PS01180&SMART_domains:SM00042&Superfamily_domains:SSF49854	integral component of membrane [GO:0016021]	immune,mortality/aging,endocrine/exocrine	NO
6	33387910	C	T	124379	246	492	492	1	492	0	WA_WD_W1	0:69,0:78,0:99	.:GG-WUR-108_GG-WUR-262_GG-WUR-068_GG-WUR-154_GG-WUR-042_GG-WUR-114_GG-WUR-121_GG-WUR-156_GG-WUR-059_GG-WUR-253_GG-WUR-116_GG-WUR-261_GG-WUR-257_GG-WUR-113_GG-WUR-120_GG-WUR-117_GG-WUR-159_GG-WUR-258_GG-WUR-036_GG-WUR-162_GG-WUR-256_GG-WUR-239_GG-WUR-051_GG-WUR-092_GG-WUR-163_GG-WUR-069_GG-WUR-115_GG-WUR-130_GG-WUR-238_GG-WUR-236_GG-WUR-123_GG-WUR-055_GG-WUR-263_GG-WUR-175_GG-WUR-050_GG-WUR-153_G…	207	48|21|0	missense_variant	MODERATE	PTPRE	ENSGALG00000009823	ENSGALT00000072972	14/19	-	1082	1082	361	T/I	aCt/aTt	-	deleterious(0.01)	-1.192	PROSITE_profiles:PS50055&Low_complexity_(Seg):seg	cytoplasm [GO:0005737]; integral component of membrane [GO:0016021]; nucleus [GO:0005634]; plasma membrane [GO:0005886]; protein tyrosine phosphatase activity [GO:0004725]; negative regulation of insulin receptor signaling pathway [GO:0046627]; regulation of mast cell activation [GO:0033003]; transmembrane receptor protein tyrosine phosphatase signaling pathway [GO:0007185]	skeleton,limbs/digits/tail,immune,cellular,nervous system,hematopoietic	YES
6	34204161	A	G	127008	246	492	492	1	492	0	WA_WD_W1	0:68,0:78,0:100	.:GG-WUR-108_GG-WUR-262_GG-WUR-068_GG-WUR-154_GG-WUR-042_GG-WUR-114_GG-WUR-121_GG-WUR-156_GG-WUR-059_GG-WUR-253_GG-WUR-116_GG-WUR-261_GG-WUR-257_GG-WUR-113_GG-WUR-120_GG-WUR-117_GG-WUR-159_GG-WUR-258_GG-WUR-036_GG-WUR-162_GG-WUR-256_GG-WUR-239_GG-WUR-051_GG-WUR-092_GG-WUR-163_GG-WUR-069_GG-WUR-115_GG-WUR-130_GG-WUR-238_GG-WUR-236_GG-WUR-123_GG-WUR-055_GG-WUR-263_GG-WUR-175_GG-WUR-050_GG-WUR-153_G…	442	57|8|0	stop_lost	HIGH	EBF3	ENSGALG00000010461	ENSGALT00000017030	16/16	-	1849	1849	617	*/Q	Tag/Cag	-	-	NA	-	nucleus [GO:0005634]; DNA binding [GO:0003677]; metal ion binding [GO:0046872]; multicellular organism development [GO:0007275]; regulation of transcription, DNA-templated [GO:0006355]; transcription, DNA-templated [GO:0006351]nucleus [GO:0005634]; metal ion binding [GO:0046872]; RNA polymerase II core promoter proximal region sequence-specific DNA binding [GO:0000978]; transcriptional activator …	mortality/aging,nervous system,hematopoietic,cardiovascular	YES
7	6664845	G	A	97586.4	245	489	490	0.997959	488	1	WA_WD_W1	0:70,0:77,1:97	.:GG-WUR-108_GG-WUR-262_GG-WUR-068_GG-WUR-154_GG-WUR-042_GG-WUR-114_GG-WUR-121_GG-WUR-156_GG-WUR-059_GG-WUR-253_GG-WUR-116_GG-WUR-261_GG-WUR-257_GG-WUR-113_GG-WUR-120_GG-WUR-117_GG-WUR-159_GG-WUR-258_GG-WUR-036_GG-WUR-162_GG-WUR-239_GG-WUR-051_GG-WUR-092_GG-WUR-163_GG-WUR-069_GG-WUR-115_GG-WUR-130_GG-WUR-238_GG-WUR-236_GG-WUR-123_GG-WUR-055_GG-WUR-263_GG-WUR-175_GG-WUR-050_GG-WUR-153_GG-WUR-118_G…	1355	55|3|9	missense_variant	MODERATE	SLC19A1	ENSGALG00000030511	ENSGALT00000077581	4/6	-	1290	1096	366	L/F	Ctc/Ttc	-	deleterious(0.03)	-3.143	1.20.1250.20&Pfam_domain:PF01770&PIRSF_domain:PIRSF028739&PIRSF_domain:PIRSF500793&PTHR10686&PTHR10686:SF12&Superfamily_domains:SSF103473&TIGRFAM_domain:TIGR00806&Transmembrane_helices:TMhelix	integral component of plasma membrane [GO:0005887]; folic acid transporter activity [GO:0008517]; methotrexate transporter activity [GO:0015350]	embryo,reproductive,growth/size/body,endocrine/exocrine,liver/biliary,immune,renal/urinary,homeostasis,mortality/aging,integument,hematopoietic,digestive/alimentary	YES
7	11449613	TGGCCACG	TGGCCACGGCCACG	88526.3	236	464	472	0.983051	456	8	WA_WD_W1	1:66,2:74,5:88	GG-WUR-252:GG-WUR-108_GG-WUR-262_GG-WUR-068_GG-WUR-154_GG-WUR-042_GG-WUR-114_GG-WUR-121_GG-WUR-156_GG-WUR-059_GG-WUR-253_GG-WUR-116_GG-WUR-261_GG-WUR-257_GG-WUR-113_GG-WUR-120_GG-WUR-117_GG-WUR-159_GG-WUR-036_GG-WUR-256_GG-WUR-239_GG-WUR-051_GG-WUR-092_GG-WUR-163_GG-WUR-069_GG-WUR-115_GG-WUR-130_GG-WUR-236_GG-WUR-123_GG-WUR-055_GG-WUR-263_GG-WUR-175_GG-WUR-050_GG-WUR-153_GG-WUR-118_GG-WUR-259_GG-…	11985	54|9|0	inframe_insertion	MODERATE	NDUFB3	ENSGALG00000008239	ENSGALT00000013407	2/3	-	331-337	28-34	2017-12-10	GHG/GHGHG	GGCCACGgc/GGCCACGGCCACGgc	-	-	2.632	Low_complexity_(Seg):seg&PTHR15082&PTHR15082:SF2	extracellular exosome [GO:0070062]; mitochondrial respiratory chain complex I [GO:0005747]; electron transport chain [GO:0022900]	-	NO
7	12591640	T	C	92475	247	449	494	0.908907	412	37	WA_WD_W1	0:70,37:36,0:100	.:GG-WUR-108_GG-WUR-068_GG-WUR-154_GG-WUR-042_GG-WUR-114_GG-WUR-121_GG-WUR-156_GG-WUR-059_GG-WUR-253_GG-WUR-116_GG-WUR-261_GG-WUR-257_GG-WUR-113_GG-WUR-120_GG-WUR-117_GG-WUR-159_GG-WUR-258_GG-WUR-036_GG-WUR-162_GG-WUR-256_GG-WUR-239_GG-WUR-051_GG-WUR-092_GG-WUR-163_GG-WUR-069_GG-WUR-115_GG-WUR-130_GG-WUR-238_GG-WUR-236_GG-WUR-123_GG-WUR-055_GG-WUR-263_GG-WUR-175_GG-WUR-050_GG-WUR-153_GG-WUR-118_G…	2478	51|4|0	missense_variant	MODERATE	-	ENSGALG00000027444	ENSGALT00000043294	5/5	-	469	469	157	S/G	Agt/Ggt	-	deleterious(0.02)	-1.606	PTHR21639	nucleic acid binding [GO:0003676]; zinc ion binding [GO:0008270]	-	YES
7	15468886	CCTG	CCTCTG	87941.4	223	446	446	1	446	0	WA_WD_W1	0:56,0:74,0:93	.:GG-WUR-108_GG-WUR-262_GG-WUR-068_GG-WUR-154_GG-WUR-042_GG-WUR-121_GG-WUR-156_GG-WUR-059_GG-WUR-253_GG-WUR-261_GG-WUR-113_GG-WUR-120_GG-WUR-117_GG-WUR-159_GG-WUR-036_GG-WUR-162_GG-WUR-051_GG-WUR-092_GG-WUR-163_GG-WUR-069_GG-WUR-115_GG-WUR-130_GG-WUR-238_GG-WUR-236_GG-WUR-123_GG-WUR-055_GG-WUR-175_GG-WUR-050_GG-WUR-153_GG-WUR-118_GG-WUR-111_GG-WUR-134_GG-WUR-119_GG-WUR-088_GG-WUR-147_GG-WUR-090_G…	353	60|2|0	frameshift_variant	HIGH	FKBP7	ENSGALG00000009149	ENSGALT00000081426	3/3	-	402-404	402-404	134-135	SC/SSX	tcCTGt/tcCTCTGt	-	-	NA	PROSITE_profiles:PS50059	peptidyl-prolyl cis-trans isomerase activity [GO:0003755]; protein folding [GO:0006457]endoplasmic reticulum membrane [GO:0005789]; calcium ion binding [GO:0005509]; FK506 binding [GO:0005528]; peptidyl-prolyl cis-trans isomerase activity [GO:0003755]; chaperone-mediated protein folding [GO:0061077]	-	YES
7	21949417	A	T	123195	247	482	494	0.975708	472	10	WA_WD_W1	10:60,0:77,0:99	GG-WUR-154_GG-WUR-156_GG-WUR-253_GG-WUR-055_GG-WUR-259_GG-WUR-254_GG-WUR-134_GG-WUR-122_GG-WUR-039_GG-WUR-143:GG-WUR-108_GG-WUR-262_GG-WUR-068_GG-WUR-042_GG-WUR-114_GG-WUR-121_GG-WUR-059_GG-WUR-116_GG-WUR-261_GG-WUR-257_GG-WUR-113_GG-WUR-120_GG-WUR-117_GG-WUR-159_GG-WUR-258_GG-WUR-036_GG-WUR-162_GG-WUR-256_GG-WUR-239_GG-WUR-051_GG-WUR-092_GG-WUR-163_GG-WUR-069_GG-WUR-115_GG-WUR-130_GG-WUR-238_GG-…	1557	58|8|7	missense_variant	MODERATE	PLA2R1	ENSGALG00000011149	ENSGALT00000033111	4/30	-	782	761	254	Q/L	cAg/cTg	-	deleterious(0.04)	-5.026	PROSITE_profiles:PS50041&PTHR22803:SF74&PTHR22803&Pfam_domain:PF00059&3.10.100.10&SMART_domains:SM00034&Superfamily_domains:SSF56436	cell surface [GO:0009986]; extracellular exosome [GO:0070062]; integral component of plasma membrane [GO:0005887]; receptor complex [GO:0043235]; transmembrane signaling receptor activity [GO:0004888]; cytokine production [GO:0001816]; oxidative stress-induced premature senescence [GO:0090403]; positive regulation of arachidonic acid secretion [GO:0090238]; positive regulation of DNA damage respo…	immune	YES
7	22029525	C	T	129432	243	474	486	0.975309	462	12	WA_WD_W1	12:57,0:78,0:96	GG-WUR-108_GG-WUR-154_GG-WUR-156_GG-WUR-253_GG-WUR-236_GG-WUR-055_GG-WUR-252_GG-WUR-254_GG-WUR-134_GG-WUR-122_GG-WUR-039_GG-WUR-143:GG-WUR-262_GG-WUR-068_GG-WUR-042_GG-WUR-114_GG-WUR-121_GG-WUR-059_GG-WUR-116_GG-WUR-261_GG-WUR-257_GG-WUR-113_GG-WUR-120_GG-WUR-117_GG-WUR-159_GG-WUR-258_GG-WUR-036_GG-WUR-162_GG-WUR-256_GG-WUR-239_GG-WUR-051_GG-WUR-092_GG-WUR-163_GG-WUR-069_GG-WUR-115_GG-WUR-130_GG-…	5986	56|13|7	missense_variant	MODERATE	LY75	ENSGALG00000011153	ENSGALT00000018187	30/35	-	4351	4351	1451	P/S	Ccg/Tcg	-	tolerated(0.05)	-6.568	PROSITE_profiles:PS50041&Pfam_domain:PF00059&3.10.100.10&SMART_domains:SM00034&Superfamily_domains:SSF56436	external side of plasma membrane [GO:0009897]; integral component of plasma membrane [GO:0005887]; transmembrane signaling receptor activity [GO:0004888]	mortality/aging,hematopoietic,immune	YES
7	22547470	C	T	86676.9	238	433	476	0.909664	398	35	WA_WD_W1	0:67,0:75,35:57	.:GG-WUR-108_GG-WUR-068_GG-WUR-154_GG-WUR-042_GG-WUR-114_GG-WUR-121_GG-WUR-156_GG-WUR-059_GG-WUR-253_GG-WUR-116_GG-WUR-261_GG-WUR-257_GG-WUR-113_GG-WUR-120_GG-WUR-117_GG-WUR-159_GG-WUR-258_GG-WUR-036_GG-WUR-162_GG-WUR-256_GG-WUR-239_GG-WUR-051_GG-WUR-092_GG-WUR-163_GG-WUR-069_GG-WUR-115_GG-WUR-130_GG-WUR-238_GG-WUR-236_GG-WUR-123_GG-WUR-055_GG-WUR-263_GG-WUR-175_GG-WUR-050_GG-WUR-153_GG-WUR-118_G…	3018	47|26|4	missense_variant	MODERATE	PRKAG3	ENSGALG00000011360	ENSGALT00000038233	11/13	-	1018	1009	337	A/T	Gcc/Acc	-	deleterious(0.05)	-1.236	PROSITE_profiles:PS51371&PTHR13780:SF31&PTHR13780&3.10.580.10&Pfam_domain:PF00571&SMART_domains:SM00116&Superfamily_domains:SSF54631	extracellular space [GO:0005615]; glucose transport [GO:0015758]; glycogen biosynthetic process [GO:0005978]	muscle,homeostasis	YES
7	22580789	CTT	CTTT	80484.4	234	458	468	0.978632	448	10	WA_WD_W1	1:67,5:66,4:91	GG-WUR-143:GG-WUR-108_GG-WUR-262_GG-WUR-068_GG-WUR-154_GG-WUR-042_GG-WUR-114_GG-WUR-121_GG-WUR-156_GG-WUR-059_GG-WUR-253_GG-WUR-116_GG-WUR-261_GG-WUR-257_GG-WUR-113_GG-WUR-120_GG-WUR-159_GG-WUR-258_GG-WUR-036_GG-WUR-162_GG-WUR-256_GG-WUR-239_GG-WUR-051_GG-WUR-092_GG-WUR-163_GG-WUR-069_GG-WUR-115_GG-WUR-130_GG-WUR-238_GG-WUR-236_GG-WUR-123_GG-WUR-055_GG-WUR-263_GG-WUR-175_GG-WUR-050_GG-WUR-153_GG-…	3	62|5|0	splice_donor_variant	HIGH	STK36	ENSGALG00000011371	ENSGALT00000018550	-	13/25	-	-	-	-	-	-	-	NA	-	cytoplasm [GO:0005737]; nucleus [GO:0005634]; ATP binding [GO:0005524]; protein kinase activity [GO:0004672]; brain development [GO:0007420]; cilium assembly [GO:0060271]; epithelial cilium movement [GO:0003351]; positive regulation of hh target transcription factor activity [GO:0007228]; positive regulation of smoothened signaling pathway [GO:0045880]; post-embryonic development [GO:0009791]	respiratory,skeleton,reproductive,hearing/vestibular/ear,growth/size/body,endocrine/exocrine,immune,renal/urinary,behavior,mortality/aging,nervous system,cellular,craniofacial,hematopoietic	NO
7	22592840	A	G	127850	242	437	484	0.902893	398	39	WA_WD_W1	1:68,0:77,38:54	GG-WUR-118:GG-WUR-108_GG-WUR-262_GG-WUR-068_GG-WUR-154_GG-WUR-042_GG-WUR-114_GG-WUR-121_GG-WUR-156_GG-WUR-059_GG-WUR-253_GG-WUR-261_GG-WUR-257_GG-WUR-113_GG-WUR-120_GG-WUR-117_GG-WUR-159_GG-WUR-258_GG-WUR-036_GG-WUR-162_GG-WUR-256_GG-WUR-239_GG-WUR-051_GG-WUR-092_GG-WUR-163_GG-WUR-069_GG-WUR-115_GG-WUR-130_GG-WUR-238_GG-WUR-236_GG-WUR-123_GG-WUR-055_GG-WUR-263_GG-WUR-175_GG-WUR-050_GG-WUR-153_GG-…	482	63|2|0	missense_variant	MODERATE	BCS1L	ENSGALG00000011386	ENSGALT00000018571	8/8	-	1374	1256	419	L/P	cTg/cCg	-	deleterious_low_confidence(0.01)	0.237	-	mitochondrion [GO:0005739]; ATP binding [GO:0005524]; mitochondrial respiratory chain complex III assembly [GO:0034551]mitochondrion [GO:0005739]; ATP binding [GO:0005524]; mitochondrial respiratory chain complex I assembly [GO:0032981]; mitochondrial respiratory chain complex III assembly [GO:0034551]; mitochondrial respiratory chain complex IV assembly [GO:0033617]	behavior,reproductive,growth/size/body,endocrine/exocrine,liver/biliary,renal/urinary,cellular,mortality/aging,homeostasis	YES
7	22675229	G	C	89463.3	231	462	462	1	462	0	WA_WD_W1	0:68,0:74,0:89	.:GG-WUR-108_GG-WUR-262_GG-WUR-068_GG-WUR-154_GG-WUR-042_GG-WUR-114_GG-WUR-121_GG-WUR-156_GG-WUR-059_GG-WUR-116_GG-WUR-261_GG-WUR-257_GG-WUR-113_GG-WUR-120_GG-WUR-117_GG-WUR-159_GG-WUR-258_GG-WUR-036_GG-WUR-162_GG-WUR-256_GG-WUR-239_GG-WUR-051_GG-WUR-092_GG-WUR-163_GG-WUR-069_GG-WUR-115_GG-WUR-130_GG-WUR-238_GG-WUR-236_GG-WUR-123_GG-WUR-055_GG-WUR-263_GG-WUR-175_GG-WUR-050_GG-WUR-153_GG-WUR-118_G…	281	50|4|6	missense_variant	MODERATE	SLC11A1	ENSGALG00000011434	ENSGALT00000018648	12/15	-	1264	1236	412	I/M	atC/atG	-	deleterious(0)	-1.47	MF_00221&PTHR11706:SF40&PTHR11706&Transmembrane_helices:TMhelix&Pfam_domain:PF01566&TIGRFAM_domain:TIGR01197&Prints_domain:PR00447	endosome membrane [GO:0010008]; integral component of membrane [GO:0016021]; late endosome [GO:0005770]; lysosome [GO:0005764]; nuclear envelope [GO:0005635]; phagocytic vesicle membrane [GO:0030670]; plasma membrane [GO:0005886]; tertiary granule membrane [GO:0070821]; cadmium ion transmembrane transporter activity [GO:0015086]; manganese ion transmembrane transporter activity [GO:0005384]; meta…	immune	NO
7	22683798	T	C	59198.3	206	412	412	1	412	0	WA_WD_W1	0:54,0:61,0:91	.:GG-WUR-262_GG-WUR-154_GG-WUR-042_GG-WUR-114_GG-WUR-121_GG-WUR-156_GG-WUR-059_GG-WUR-253_GG-WUR-116_GG-WUR-261_GG-WUR-257_GG-WUR-113_GG-WUR-120_GG-WUR-117_GG-WUR-159_GG-WUR-036_GG-WUR-256_GG-WUR-051_GG-WUR-092_GG-WUR-238_GG-WUR-055_GG-WUR-263_GG-WUR-175_GG-WUR-259_GG-WUR-252_GG-WUR-111_GG-WUR-254_GG-WUR-119_GG-WUR-122_GG-WUR-088_GG-WUR-147_GG-WUR-096_GG-WUR-136_GG-WUR-240_GG-WUR-135_GG-WUR-164_G…	179	58|4|2	splice_acceptor_variant	HIGH	PNKD	ENSGALG00000022166	ENSGALT00000035713	-	4/8	-	-	-	-	-	-	-	NA	-	membrane [GO:0016020]; mitochondrion [GO:0005739]; hydroxyacylglutathione hydrolase activity [GO:0004416]; methylglyoxal catabolic process to D-lactate via S-lactoyl-glutathione [GO:0019243]; negative regulation of neurotransmitter secretion [GO:0046929]; neuromuscular process controlling posture [GO:0050884]; regulation of dopamine metabolic process [GO:0042053]; regulation of synaptic transmiss…	nervous system,behavior,homeostasis,no abnormal phenotype observed	YES
7	23633084	T	A	77063.1	218	394	436	0.90367	358	36	WA_WD_W1	0:57,18:54,18:68	.:GG-WUR-108_GG-WUR-068_GG-WUR-154_GG-WUR-042_GG-WUR-114_GG-WUR-121_GG-WUR-156_GG-WUR-059_GG-WUR-116_GG-WUR-261_GG-WUR-257_GG-WUR-113_GG-WUR-120_GG-WUR-117_GG-WUR-159_GG-WUR-036_GG-WUR-162_GG-WUR-051_GG-WUR-092_GG-WUR-163_GG-WUR-069_GG-WUR-115_GG-WUR-130_GG-WUR-236_GG-WUR-123_GG-WUR-055_GG-WUR-175_GG-WUR-050_GG-WUR-153_GG-WUR-118_GG-WUR-111_GG-WUR-134_GG-WUR-119_GG-WUR-122_GG-WUR-088_GG-WUR-147_G…	1435	67|0|0	missense_variant	MODERATE	XRCC5	ENSGALG00000011492	ENSGALT00000018729	18/21	-	2090	2090	697	Q/L	cAg/cTg	-	deleterious(0.03)	-4.064	PTHR12604:SF4&PTHR12604&PIRSF_domain:PIRSF016570&Pfam_domain:PF08785&1.25.40.240&Superfamily_domains:0049250	cytoplasm [GO:0005737]; Ku70:Ku80 complex [GO:0043564]; nonhomologous end joining complex [GO:0070419]; nuclear chromosome, telomeric region [GO:0000784]; nucleoplasm [GO:0005654]; plasma membrane [GO:0005886]; 5'-deoxyribose-5-phosphate lyase activity [GO:0051575]; ATP-dependent DNA helicase activity [GO:0004003]; damaged DNA binding [GO:0003684]; double-stranded telomeric DNA binding [GO:000369…	behavior,reproductive,growth/size/body,endocrine/exocrine,immune,vision/eye,homeostasis,cellular,mortality/aging,nervous system,hematopoietic	YES
7	26189886	A	C	104328	237	474	474	1	474	0	WA_WD_W1	0:64,0:77,0:96	.:GG-WUR-108_GG-WUR-068_GG-WUR-154_GG-WUR-042_GG-WUR-114_GG-WUR-121_GG-WUR-156_GG-WUR-059_GG-WUR-253_GG-WUR-116_GG-WUR-261_GG-WUR-113_GG-WUR-120_GG-WUR-117_GG-WUR-159_GG-WUR-258_GG-WUR-036_GG-WUR-162_GG-WUR-256_GG-WUR-239_GG-WUR-051_GG-WUR-092_GG-WUR-163_GG-WUR-069_GG-WUR-115_GG-WUR-130_GG-WUR-236_GG-WUR-123_GG-WUR-055_GG-WUR-263_GG-WUR-175_GG-WUR-050_GG-WUR-153_GG-WUR-118_GG-WUR-252_GG-WUR-111_G…	207	57|4|0	missense_variant	MODERATE	TFCP2L1	ENSGALG00000011635	ENSGALT00000029195	14/14	-	1458	1458	486	F/L	ttT/ttG	-	deleterious_low_confidence(0)	0.014	PTHR11037:SF18&PTHR11037	cytoplasm [GO:0005737]; membrane [GO:0016020]; nucleus [GO:0005634]; sequence-specific DNA binding [GO:0043565]; transcription factor activity, sequence-specific DNA binding [GO:0003700]; cell morphogenesis [GO:0000902]; cytoplasm organization [GO:0007028]; determination of adult lifespan [GO:0008340]; epithelial cell maturation [GO:0002070]; negative regulation of transcription from RNA polymera…	respiratory,craniofacial,endocrine/exocrine,renal/urinary,mortality/aging,growth/size/body,homeostasis,digestive/alimentary	YES
7	27434479	C	G	118828	246	492	492	1	492	0	WA_WD_W1	0:69,0:78,0:99	.:GG-WUR-108_GG-WUR-068_GG-WUR-154_GG-WUR-042_GG-WUR-114_GG-WUR-121_GG-WUR-156_GG-WUR-059_GG-WUR-116_GG-WUR-261_GG-WUR-257_GG-WUR-113_GG-WUR-120_GG-WUR-117_GG-WUR-159_GG-WUR-258_GG-WUR-036_GG-WUR-162_GG-WUR-256_GG-WUR-239_GG-WUR-051_GG-WUR-092_GG-WUR-163_GG-WUR-069_GG-WUR-115_GG-WUR-130_GG-WUR-238_GG-WUR-236_GG-WUR-123_GG-WUR-055_GG-WUR-263_GG-WUR-175_GG-WUR-050_GG-WUR-153_GG-WUR-118_GG-WUR-259_G…	-22	0|0|0	splice_acceptor_variant&non_coding_transcript_variant	HIGH	-	ENSGALG00000042752	ENSGALT00000068523	-	1/2	-	-	-	-	-	-	-	NA	-		-	YES
7	28114076	G	A	131245	237	474	474	1	474	0	WA_WD_W1	0:64,0:77,0:96	.:GG-WUR-108_GG-WUR-068_GG-WUR-154_GG-WUR-042_GG-WUR-114_GG-WUR-121_GG-WUR-156_GG-WUR-059_GG-WUR-253_GG-WUR-116_GG-WUR-261_GG-WUR-257_GG-WUR-113_GG-WUR-120_GG-WUR-117_GG-WUR-159_GG-WUR-258_GG-WUR-036_GG-WUR-162_GG-WUR-256_GG-WUR-051_GG-WUR-163_GG-WUR-069_GG-WUR-115_GG-WUR-130_GG-WUR-238_GG-WUR-123_GG-WUR-055_GG-WUR-263_GG-WUR-175_GG-WUR-050_GG-WUR-153_GG-WUR-118_GG-WUR-252_GG-WUR-111_GG-WUR-134_G…	1512	62|2|0	missense_variant	MODERATE	-	ENSGALG00000011813	ENSGALT00000019286	11/21	-	3638	3638	1213	T/M	aCg/aTg	-	deleterious(0.02)	-1.161	PTHR24037&PTHR24037:SF3	integral component of membrane [GO:0016021]; calcium ion binding [GO:0005509]; cell-cell junction assembly [GO:0007043]; heart development [GO:0007507]	-	YES
7	28116854	G	A	120889	238	476	476	1	476	0	WA_WD_W1	0:63,0:77,0:98	.:GG-WUR-108_GG-WUR-068_GG-WUR-154_GG-WUR-042_GG-WUR-114_GG-WUR-121_GG-WUR-156_GG-WUR-059_GG-WUR-116_GG-WUR-261_GG-WUR-113_GG-WUR-120_GG-WUR-117_GG-WUR-159_GG-WUR-258_GG-WUR-036_GG-WUR-162_GG-WUR-256_GG-WUR-239_GG-WUR-051_GG-WUR-092_GG-WUR-163_GG-WUR-069_GG-WUR-115_GG-WUR-130_GG-WUR-238_GG-WUR-236_GG-WUR-123_GG-WUR-055_GG-WUR-263_GG-WUR-175_GG-WUR-050_GG-WUR-153_GG-WUR-118_GG-WUR-259_GG-WUR-111_G…	735	62|2|0	missense_variant	MODERATE	-	ENSGALG00000011813	ENSGALT00000019286	9/21	-	2480	2480	827	S/L	tCa/tTa	-	deleterious_low_confidence(0.01)	-2.644	-	integral component of membrane [GO:0016021]; calcium ion binding [GO:0005509]; cell-cell junction assembly [GO:0007043]; heart development [GO:0007507]	-	YES
7	29050164	C	T	103123	239	478	478	1	478	0	WA_WD_W1	0:64,0:76,0:99	.:GG-WUR-108_GG-WUR-262_GG-WUR-068_GG-WUR-154_GG-WUR-042_GG-WUR-114_GG-WUR-121_GG-WUR-156_GG-WUR-059_GG-WUR-261_GG-WUR-257_GG-WUR-113_GG-WUR-120_GG-WUR-159_GG-WUR-258_GG-WUR-036_GG-WUR-162_GG-WUR-256_GG-WUR-239_GG-WUR-051_GG-WUR-092_GG-WUR-163_GG-WUR-069_GG-WUR-115_GG-WUR-130_GG-WUR-238_GG-WUR-236_GG-WUR-123_GG-WUR-055_GG-WUR-175_GG-WUR-050_GG-WUR-153_GG-WUR-118_GG-WUR-252_GG-WUR-111_GG-WUR-254_G…	1565	61|4|0	missense_variant	MODERATE	CCDC93	ENSGALG00000012129	ENSGALT00000019817	15/23	-	1221	1166	389	T/M	aCg/aTg	-	deleterious(0.04)	-1.468	PTHR16441&PTHR16441:SF0	Golgi to plasma membrane transport [GO:0006893]	-	YES
7	35342028	A	T	125351	244	488	488	1	488	0	WA_WD_W1	0:68,0:78,0:98	.:GG-WUR-108_GG-WUR-262_GG-WUR-068_GG-WUR-154_GG-WUR-042_GG-WUR-114_GG-WUR-121_GG-WUR-156_GG-WUR-059_GG-WUR-253_GG-WUR-116_GG-WUR-261_GG-WUR-257_GG-WUR-113_GG-WUR-120_GG-WUR-159_GG-WUR-036_GG-WUR-162_GG-WUR-256_GG-WUR-239_GG-WUR-051_GG-WUR-092_GG-WUR-163_GG-WUR-069_GG-WUR-115_GG-WUR-130_GG-WUR-238_GG-WUR-236_GG-WUR-123_GG-WUR-055_GG-WUR-263_GG-WUR-175_GG-WUR-050_GG-WUR-153_GG-WUR-118_GG-WUR-259_G…	891	58|4|0	missense_variant	MODERATE	RIF1	ENSGALG00000012484	ENSGALT00000037786	13/35	-	1501	1501	501	S/C	Agt/Tgt	-	deleterious(0.04)	1	PTHR22928	chromosome, telomeric region [GO:0000781]; condensed chromosome [GO:0000793]; female pronucleus [GO:0001939]; male pronucleus [GO:0001940]; plasma membrane [GO:0005886]; spindle midzone [GO:0051233]; negative regulation of transcription from RNA polymerase II promoter [GO:0000122]; positive regulation of double-strand break repair via nonhomologous end joining [GO:2001034]; stem cell population m…	embryo,reproductive,growth/size/body,endocrine/exocrine,immune,homeostasis,cellular,no abnormal phenotype observed,mortality/aging,hematopoietic	YES
8	1329697	GTTTTTTTTTA	GTTTTTTTTA	101404	229	458	458	1	458	0	WA_WD_W1	0:62,0:74,0:93	.:GG-WUR-108_GG-WUR-262_GG-WUR-068_GG-WUR-154_GG-WUR-042_GG-WUR-114_GG-WUR-121_GG-WUR-156_GG-WUR-059_GG-WUR-116_GG-WUR-261_GG-WUR-113_GG-WUR-120_GG-WUR-117_GG-WUR-159_GG-WUR-036_GG-WUR-162_GG-WUR-239_GG-WUR-051_GG-WUR-092_GG-WUR-163_GG-WUR-069_GG-WUR-115_GG-WUR-130_GG-WUR-238_GG-WUR-236_GG-WUR-123_GG-WUR-055_GG-WUR-263_GG-WUR-175_GG-WUR-050_GG-WUR-153_GG-WUR-118_GG-WUR-259_GG-WUR-111_GG-WUR-134_G…	2282	60|8|0	splice_acceptor_variant&intron_variant	HIGH	GPSM2	ENSGALG00000002090	ENSGALT00000003258	-	11/14	-	-	-	-	-	-	-	NA	-	apical part of cell [GO:0045177]; cell cortex [GO:0005938]; mitotic spindle pole [GO:0097431]; GDP-dissociation inhibitor activity [GO:0005092]; establishment of mitotic spindle orientation [GO:0000132]; lung epithelial cell differentiation [GO:0060487]; maintenance of centrosome location [GO:0051661]; mitotic spindle organization [GO:0007052]	behavior,hearing/vestibular/ear,vision/eye,cellular,mortality/aging,nervous system,hematopoietic	NO
8	2618584	TGAGA	TGAGGAGA	82377.7	231	461	462	0.997836	460	1	WA_WD_W1	1:63,0:71,0:96	GG-WUR-116:GG-WUR-108_GG-WUR-068_GG-WUR-154_GG-WUR-042_GG-WUR-121_GG-WUR-156_GG-WUR-059_GG-WUR-253_GG-WUR-261_GG-WUR-257_GG-WUR-113_GG-WUR-120_GG-WUR-117_GG-WUR-159_GG-WUR-258_GG-WUR-036_GG-WUR-256_GG-WUR-239_GG-WUR-051_GG-WUR-092_GG-WUR-163_GG-WUR-069_GG-WUR-115_GG-WUR-130_GG-WUR-238_GG-WUR-236_GG-WUR-123_GG-WUR-055_GG-WUR-263_GG-WUR-175_GG-WUR-050_GG-WUR-153_GG-WUR-259_GG-WUR-252_GG-WUR-111_GG-…	1065	61|5|0	inframe_insertion	MODERATE	ASPM	ENSGALG00000032398	ENSGALT00000062608	3/25	-	738-741	738-741	246-247	MR/MRR	atGAGA/atGAGGAGA	-	-	11.673	-	integral component of membrane [GO:0016021]; spindle organization [GO:0007051]	reproductive,growth/size/body,endocrine/exocrine,homeostasis,cellular,nervous system,hematopoietic	NO
8	3823076	C	T	113963	237	473	474	0.99789	472	1	WA_WD_W1	0:66,0:77,1:93	.:GG-WUR-108_GG-WUR-068_GG-WUR-154_GG-WUR-042_GG-WUR-114_GG-WUR-121_GG-WUR-156_GG-WUR-059_GG-WUR-116_GG-WUR-261_GG-WUR-257_GG-WUR-113_GG-WUR-120_GG-WUR-117_GG-WUR-159_GG-WUR-258_GG-WUR-036_GG-WUR-162_GG-WUR-239_GG-WUR-051_GG-WUR-092_GG-WUR-163_GG-WUR-069_GG-WUR-115_GG-WUR-130_GG-WUR-238_GG-WUR-236_GG-WUR-123_GG-WUR-055_GG-WUR-263_GG-WUR-175_GG-WUR-050_GG-WUR-153_GG-WUR-118_GG-WUR-259_GG-WUR-252_G…	1530	60|9|0	missense_variant	MODERATE	UAP1	ENSGALG00000002725	ENSGALT00000004299	9/9	-	1403	1403	468	R/H	cGc/cAc	-	deleterious(0.01)	-0.94	PTHR11952&PTHR11952:SF4	uridylyltransferase activity [GO:0070569]; metabolic process [GO:0008152]uridylyltransferase activity [GO:0070569]; metabolic process [GO:0008152]uridylyltransferase activity [GO:0070569]; metabolic process [GO:0008152]cytosol [GO:0005829]; nucleoplasm [GO:0005654]; plasma membrane [GO:0005886]; UDP-N-acetylglucosamine diphosphorylase activity [GO:0003977]; UDP-N-acetylglucosamine biosynthetic pr…	-	YES
8	4346407	G	C	108827	244	460	488	0.942623	436	24	WA_WD_W1	0:68,0:77,24:73	.:GG-WUR-108_GG-WUR-262_GG-WUR-068_GG-WUR-154_GG-WUR-042_GG-WUR-114_GG-WUR-121_GG-WUR-156_GG-WUR-059_GG-WUR-253_GG-WUR-116_GG-WUR-261_GG-WUR-257_GG-WUR-113_GG-WUR-120_GG-WUR-117_GG-WUR-159_GG-WUR-258_GG-WUR-036_GG-WUR-162_GG-WUR-256_GG-WUR-239_GG-WUR-051_GG-WUR-092_GG-WUR-163_GG-WUR-069_GG-WUR-115_GG-WUR-130_GG-WUR-236_GG-WUR-123_GG-WUR-055_GG-WUR-263_GG-WUR-175_GG-WUR-050_GG-WUR-153_GG-WUR-118_G…	1127	63|2|0	splice_acceptor_variant	HIGH	TADA1	ENSGALG00000032173	ENSGALT00000057071	-	4/5	-	-	-	-	-	-	-	NA	-	SAGA-type complex [GO:0070461]SAGA-type complex [GO:0070461]	growth/size/body	YES
8	5090371	TCTCACTCAC	TCTCAC	90238.8	238	476	476	1	476	0	WA_WD_W1	0:69,0:73,0:96	.:GG-WUR-108_GG-WUR-262_GG-WUR-068_GG-WUR-154_GG-WUR-042_GG-WUR-114_GG-WUR-121_GG-WUR-156_GG-WUR-059_GG-WUR-253_GG-WUR-116_GG-WUR-261_GG-WUR-113_GG-WUR-120_GG-WUR-117_GG-WUR-159_GG-WUR-036_GG-WUR-162_GG-WUR-256_GG-WUR-239_GG-WUR-051_GG-WUR-092_GG-WUR-163_GG-WUR-069_GG-WUR-115_GG-WUR-130_GG-WUR-238_GG-WUR-236_GG-WUR-123_GG-WUR-055_GG-WUR-263_GG-WUR-175_GG-WUR-050_GG-WUR-153_GG-WUR-118_GG-WUR-259_G…	112	62|4|0	splice_donor_variant&intron_variant	HIGH	C1orf112	ENSGALG00000032743	ENSGALT00000072136	-	9/14	-	-	-	-	-	-	-	NA	-	-	mortality/aging,homeostasis,hematopoietic,skeleton	NO
8	6101823	A	G	120536	238	452	476	0.94958	432	20	WA_WD_W1	1:63,19:56,0:97	GG-WUR-088:GG-WUR-108_GG-WUR-262_GG-WUR-068_GG-WUR-154_GG-WUR-042_GG-WUR-114_GG-WUR-121_GG-WUR-156_GG-WUR-059_GG-WUR-116_GG-WUR-261_GG-WUR-113_GG-WUR-120_GG-WUR-117_GG-WUR-159_GG-WUR-258_GG-WUR-036_GG-WUR-162_GG-WUR-239_GG-WUR-051_GG-WUR-092_GG-WUR-163_GG-WUR-069_GG-WUR-115_GG-WUR-130_GG-WUR-238_GG-WUR-236_GG-WUR-123_GG-WUR-055_GG-WUR-263_GG-WUR-175_GG-WUR-050_GG-WUR-153_GG-WUR-118_GG-WUR-111_GG-…	-4	0|0|0	splice_donor_variant&non_coding_transcript_variant	HIGH	-	ENSGALG00000034301	ENSGALT00000061042	-	2/2	-	-	-	-	-	-	-	NA	-		-	YES
8	7634640	T	C	131645	246	492	492	1	492	0	WA_WD_W1	0:71,0:77,0:98	.:GG-WUR-108_GG-WUR-262_GG-WUR-068_GG-WUR-154_GG-WUR-042_GG-WUR-114_GG-WUR-121_GG-WUR-156_GG-WUR-059_GG-WUR-253_GG-WUR-116_GG-WUR-261_GG-WUR-257_GG-WUR-113_GG-WUR-120_GG-WUR-117_GG-WUR-159_GG-WUR-258_GG-WUR-036_GG-WUR-162_GG-WUR-256_GG-WUR-239_GG-WUR-051_GG-WUR-092_GG-WUR-163_GG-WUR-069_GG-WUR-115_GG-WUR-130_GG-WUR-238_GG-WUR-236_GG-WUR-123_GG-WUR-055_GG-WUR-263_GG-WUR-175_GG-WUR-050_GG-WUR-153_G…	815	62|2|0	splice_donor_variant	HIGH	SMG7	ENSGALG00000004667	ENSGALT00000007437	-	21/22	-	-	-	-	-	-	-	NA	-	cytoplasm [GO:0005737]; intermediate filament cytoskeleton [GO:0045111]; telomerase holoenzyme complex [GO:0005697]; ribonuclease activity [GO:0004540]; ribonucleoprotein complex binding [GO:0043021]; telomerase RNA binding [GO:0070034]; telomeric DNA binding [GO:0042162]; mRNA export from nucleus [GO:0006406]; nuclear-transcribed mRNA catabolic process, nonsense-mediated decay [GO:0000184]; regu…	-	YES
8	13657948	A	G	108881	235	469	470	0.997872	468	1	WA_WD_W1	0:64,1:74,0:96	.:GG-WUR-108_GG-WUR-068_GG-WUR-154_GG-WUR-042_GG-WUR-114_GG-WUR-121_GG-WUR-156_GG-WUR-059_GG-WUR-116_GG-WUR-261_GG-WUR-257_GG-WUR-113_GG-WUR-120_GG-WUR-117_GG-WUR-159_GG-WUR-258_GG-WUR-036_GG-WUR-162_GG-WUR-256_GG-WUR-239_GG-WUR-051_GG-WUR-092_GG-WUR-163_GG-WUR-069_GG-WUR-115_GG-WUR-130_GG-WUR-238_GG-WUR-236_GG-WUR-123_GG-WUR-055_GG-WUR-175_GG-WUR-050_GG-WUR-153_GG-WUR-118_GG-WUR-252_GG-WUR-111_G…	520	50|28|0	splice_acceptor_variant	HIGH	ARHGAP29	ENSGALG00000005683	ENSGALT00000044091	-	6/24	-	-	-	-	-	-	-	NA	-	cytoplasm [GO:0005737]; metal ion binding [GO:0046872]; intracellular signal transduction [GO:0035556]intracellular [GO:0005622]; metal ion binding [GO:0046872]; intracellular signal transduction [GO:0035556]intracellular [GO:0005622]; metal ion binding [GO:0046872]; intracellular signal transduction [GO:0035556]	-	YES
8	13795018	CAAGAAGAAGT	CAAGAAGT	106162	246	492	492	1	492	0	WA_WD_W1	0:69,0:78,0:99	.:GG-WUR-108_GG-WUR-262_GG-WUR-068_GG-WUR-154_GG-WUR-042_GG-WUR-114_GG-WUR-121_GG-WUR-156_GG-WUR-059_GG-WUR-253_GG-WUR-116_GG-WUR-261_GG-WUR-257_GG-WUR-113_GG-WUR-120_GG-WUR-117_GG-WUR-159_GG-WUR-258_GG-WUR-036_GG-WUR-162_GG-WUR-256_GG-WUR-239_GG-WUR-051_GG-WUR-092_GG-WUR-163_GG-WUR-069_GG-WUR-115_GG-WUR-130_GG-WUR-238_GG-WUR-236_GG-WUR-123_GG-WUR-055_GG-WUR-263_GG-WUR-175_GG-WUR-050_GG-WUR-153_G…	2599	58|13|0	inframe_deletion	MODERATE	GCLM	ENSGALG00000005782	ENSGALT00000009292	1/6	-	454-463	454-463	152-155	KKKL/KKL	AAGAAGAAGTtg/AAGAAGTtg	-	-	-3.697	Low_complexity_(Seg):seg&PTHR21686&PTHR21686:SF12	glutamate-cysteine ligase complex [GO:0017109]; enzyme regulator activity [GO:0030234]; glutathione biosynthetic process [GO:0006750]; positive regulation of glutamate-cysteine ligase activity [GO:0035229]	mortality/aging,nervous system,homeostasis,cellular	NO
8	14011970	T	C	109649	244	488	488	1	488	0	WA_WD_W1	0:67,0:77,0:100	.:GG-WUR-108_GG-WUR-262_GG-WUR-068_GG-WUR-154_GG-WUR-042_GG-WUR-114_GG-WUR-121_GG-WUR-156_GG-WUR-059_GG-WUR-253_GG-WUR-116_GG-WUR-261_GG-WUR-113_GG-WUR-120_GG-WUR-117_GG-WUR-258_GG-WUR-036_GG-WUR-162_GG-WUR-256_GG-WUR-239_GG-WUR-051_GG-WUR-092_GG-WUR-163_GG-WUR-069_GG-WUR-115_GG-WUR-130_GG-WUR-238_GG-WUR-236_GG-WUR-123_GG-WUR-055_GG-WUR-263_GG-WUR-175_GG-WUR-050_GG-WUR-153_GG-WUR-118_GG-WUR-259_G…	628	59|9|0	missense_variant	MODERATE	CCDC18	ENSGALG00000005889	ENSGALT00000009468	4/29	-	494	421	141	M/V	Atg/Gtg	-	deleterious(0.03)	1	PTHR18875:SF8&PTHR18875	-	-	YES
8	20217155	G	T	101436	245	490	490	1	490	0	WA_WD_W1	0:70,0:76,0:99	.:GG-WUR-262_GG-WUR-068_GG-WUR-154_GG-WUR-042_GG-WUR-114_GG-WUR-121_GG-WUR-156_GG-WUR-059_GG-WUR-253_GG-WUR-116_GG-WUR-261_GG-WUR-257_GG-WUR-113_GG-WUR-120_GG-WUR-117_GG-WUR-159_GG-WUR-258_GG-WUR-036_GG-WUR-162_GG-WUR-256_GG-WUR-239_GG-WUR-051_GG-WUR-092_GG-WUR-163_GG-WUR-069_GG-WUR-115_GG-WUR-130_GG-WUR-238_GG-WUR-236_GG-WUR-123_GG-WUR-055_GG-WUR-263_GG-WUR-175_GG-WUR-050_GG-WUR-153_GG-WUR-118_G…	523	46|27|0	missense_variant	MODERATE	PTPRF	ENSGALG00000010053	ENSGALT00000016337	28/33	-	4989	4989	1663	R/S	agG/agT	-	deleterious(0.02)	-5.412	3.90.190.10&SMART_domains:SM00194&Superfamily_domains:SSF52799&PROSITE_profiles:PS50055	integral component of membrane [GO:0016021]; protein tyrosine phosphatase activity [GO:0004725]integral component of membrane [GO:0016021]; protein tyrosine phosphatase activity [GO:0004725]integral component of membrane [GO:0016021]; protein tyrosine phosphatase activity [GO:0004725]integral component of membrane [GO:0016021]; protein tyrosine phosphatase activity [GO:0004725]integral component …	muscle,behavior,growth/size/body,endocrine/exocrine,vision/eye,cellular,mortality/aging,integument,nervous system,homeostasis,cardiovascular	NO
8	21673636	A	G	138689	245	490	490	1	490	0	WA_WD_W1	0:70,0:78,0:97	.:GG-WUR-108_GG-WUR-262_GG-WUR-068_GG-WUR-154_GG-WUR-042_GG-WUR-114_GG-WUR-121_GG-WUR-156_GG-WUR-059_GG-WUR-253_GG-WUR-116_GG-WUR-261_GG-WUR-257_GG-WUR-113_GG-WUR-120_GG-WUR-117_GG-WUR-159_GG-WUR-258_GG-WUR-036_GG-WUR-162_GG-WUR-256_GG-WUR-239_GG-WUR-051_GG-WUR-092_GG-WUR-163_GG-WUR-069_GG-WUR-115_GG-WUR-130_GG-WUR-238_GG-WUR-236_GG-WUR-123_GG-WUR-055_GG-WUR-263_GG-WUR-175_GG-WUR-050_GG-WUR-153_G…	979	63|5|0	missense_variant	MODERATE	NSUN4	ENSGALG00000010360	ENSGALT00000016868	4/6	-	805	797	266	Q/R	cAa/cGa	-	deleterious(0)	-1.216	PROSITE_profiles:PS51686&PTHR22808&PTHR22808:SF3&3.40.50.150&Pfam_domain:PF01189&Superfamily_domains:SSF53335	mitochondrial large ribosomal subunit [GO:0005762]; methyltransferase activity [GO:0008168]; RNA binding [GO:0003723]; rRNA methylation [GO:0031167]	-	YES
8	21900981	G	T	143634	245	490	490	1	490	0	WA_WD_W1	0:70,0:77,0:98	.:GG-WUR-108_GG-WUR-262_GG-WUR-068_GG-WUR-154_GG-WUR-042_GG-WUR-114_GG-WUR-121_GG-WUR-156_GG-WUR-059_GG-WUR-253_GG-WUR-116_GG-WUR-261_GG-WUR-257_GG-WUR-113_GG-WUR-120_GG-WUR-117_GG-WUR-159_GG-WUR-258_GG-WUR-036_GG-WUR-162_GG-WUR-256_GG-WUR-239_GG-WUR-051_GG-WUR-092_GG-WUR-163_GG-WUR-069_GG-WUR-115_GG-WUR-130_GG-WUR-238_GG-WUR-236_GG-WUR-123_GG-WUR-055_GG-WUR-263_GG-WUR-175_GG-WUR-050_GG-WUR-153_G…	931	57|5|0	missense_variant	MODERATE	MOB3C	ENSGALG00000025946	ENSGALT00000045632	2/3	-	526	526	176	R/S	Cgc/Agc	-	tolerated(0.57)	-2.586	PTHR22599&PTHR22599:SF12&Pfam_domain:PF03637&1pi1A00&SMART_domains:SM01388&Superfamily_domains:0049093	-	-	NO
8	21991955	A	G	149106	228	455	456	0.997807	454	1	WA_WD_W1	1:58,0:76,0:93	GG-WUR-122:GG-WUR-108_GG-WUR-068_GG-WUR-154_GG-WUR-042_GG-WUR-114_GG-WUR-121_GG-WUR-156_GG-WUR-059_GG-WUR-116_GG-WUR-113_GG-WUR-120_GG-WUR-117_GG-WUR-159_GG-WUR-258_GG-WUR-036_GG-WUR-162_GG-WUR-051_GG-WUR-092_GG-WUR-163_GG-WUR-069_GG-WUR-115_GG-WUR-130_GG-WUR-236_GG-WUR-123_GG-WUR-055_GG-WUR-263_GG-WUR-175_GG-WUR-050_GG-WUR-153_GG-WUR-118_GG-WUR-252_GG-WUR-111_GG-WUR-134_GG-WUR-119_GG-WUR-088_GG-…	939	60|10|0	missense_variant	MODERATE	STIL	ENSGALG00000010478	ENSGALT00000017063	17/17	-	3140	3140	1047	V/A	gTt/gCt	-	tolerated(0.26)	-3.364	PTHR15128:SF0&PTHR15128	centriole [GO:0005814]; centrosome duplication [GO:0051298]; mitotic spindle organization [GO:0007052]; protein localization to centrosome [GO:0071539]; regulation of centriole replication [GO:0046599]	embryo,mortality/aging,growth/size/body,nervous system,cellular	YES
8	26755686	A	G	137511	249	498	498	1	498	0	WA_WD_W1	0:71,0:78,0:100	.:GG-WUR-108_GG-WUR-262_GG-WUR-068_GG-WUR-154_GG-WUR-042_GG-WUR-114_GG-WUR-121_GG-WUR-156_GG-WUR-059_GG-WUR-253_GG-WUR-116_GG-WUR-261_GG-WUR-257_GG-WUR-113_GG-WUR-120_GG-WUR-117_GG-WUR-159_GG-WUR-258_GG-WUR-036_GG-WUR-162_GG-WUR-256_GG-WUR-239_GG-WUR-051_GG-WUR-092_GG-WUR-163_GG-WUR-069_GG-WUR-115_GG-WUR-130_GG-WUR-238_GG-WUR-236_GG-WUR-123_GG-WUR-055_GG-WUR-263_GG-WUR-175_GG-WUR-050_GG-WUR-153_G…	186	0|0|0	splice_donor_variant&non_coding_transcript_variant	HIGH	-	ENSGALG00000040192	ENSGALT00000051147	-	2/3	-	-	-	-	-	-	-	NA	-		-	YES
8	27931977	C	T	102917	236	472	472	1	472	0	WA_WD_W1	0:63,0:76,0:97	.:GG-WUR-108_GG-WUR-068_GG-WUR-154_GG-WUR-042_GG-WUR-114_GG-WUR-121_GG-WUR-156_GG-WUR-059_GG-WUR-253_GG-WUR-116_GG-WUR-261_GG-WUR-257_GG-WUR-113_GG-WUR-120_GG-WUR-117_GG-WUR-159_GG-WUR-036_GG-WUR-162_GG-WUR-256_GG-WUR-239_GG-WUR-051_GG-WUR-092_GG-WUR-163_GG-WUR-069_GG-WUR-115_GG-WUR-130_GG-WUR-123_GG-WUR-055_GG-WUR-263_GG-WUR-175_GG-WUR-050_GG-WUR-153_GG-WUR-118_GG-WUR-259_GG-WUR-111_GG-WUR-254_G…	21	0|0|0	splice_donor_variant	HIGH	ITGB3BP	ENSGALG00000010995	ENSGALT00000017906	-	1/7	-	-	-	-	-	-	-	NA	-	CENP-A containing nucleosome assembly [GO:0034080]; regulation of transcription, DNA-templated [GO:0006355]CENP-A containing nucleosome assembly [GO:0034080]; regulation of transcription, DNA-templated [GO:0006355]CENP-A containing nucleosome assembly [GO:0034080]; regulation of transcription, DNA-templated [GO:0006355]CENP-A containing nucleosome assembly [GO:0034080]; regulation of transcriptio…	-	YES
9	1360192	T	G	101810	243	485	486	0.997942	484	1	WA_WD_W1	0:69,0:76,1:97	.:GG-WUR-108_GG-WUR-262_GG-WUR-068_GG-WUR-154_GG-WUR-042_GG-WUR-114_GG-WUR-121_GG-WUR-156_GG-WUR-059_GG-WUR-253_GG-WUR-116_GG-WUR-261_GG-WUR-257_GG-WUR-113_GG-WUR-120_GG-WUR-117_GG-WUR-159_GG-WUR-036_GG-WUR-162_GG-WUR-256_GG-WUR-239_GG-WUR-051_GG-WUR-092_GG-WUR-163_GG-WUR-069_GG-WUR-115_GG-WUR-130_GG-WUR-238_GG-WUR-236_GG-WUR-123_GG-WUR-055_GG-WUR-263_GG-WUR-175_GG-WUR-050_GG-WUR-153_GG-WUR-118_G…	3484	50|22|0	missense_variant	MODERATE	LIMS2	ENSGALG00000001995	ENSGALT00000003103	9/9	-	957	957	319	R/S	agA/agC	-	deleterious(0)	-5.079	Low_complexity_(Seg):seg&PTHR24210&PTHR24210:SF10&PIRSF_domain:PIRSF038003	focal adhesion [GO:0005925]; zinc ion binding [GO:0008270]; cell-cell junction organization [GO:0045216]; negative regulation of apoptotic process [GO:0043066]; negative regulation of hepatocyte proliferation [GO:2000346]; negative regulation of neural precursor cell proliferation [GO:2000178]; positive regulation of integrin-mediated signaling pathway [GO:2001046]; single organismal cell-cell ad…	no abnormal phenotype observed,muscle,homeostasis,cardiovascular	NO
9	1363213	GT	AC	49065.5	176	351	352	0.997159	350	1	WA_WD_W1	0:51,0:52,1:72	.:GG-WUR-262_GG-WUR-154_GG-WUR-042_GG-WUR-114_GG-WUR-121_GG-WUR-156_GG-WUR-059_GG-WUR-116_GG-WUR-261_GG-WUR-257_GG-WUR-113_GG-WUR-120_GG-WUR-159_GG-WUR-239_GG-WUR-051_GG-WUR-092_GG-WUR-130_GG-WUR-238_GG-WUR-123_GG-WUR-055_GG-WUR-263_GG-WUR-175_GG-WUR-050_GG-WUR-153_GG-WUR-259_GG-WUR-111_GG-WUR-254_GG-WUR-134_GG-WUR-119_GG-WUR-122_GG-WUR-088_GG-WUR-096_GG-WUR-240_GG-WUR-160_GG-WUR-135_GG-WUR-164_G…	501	50|22|0	missense_variant	MODERATE	LIMS2	ENSGALG00000001995	ENSGALT00000003103	5/9	-	516-517	516-517	172-173	EL/EF	gaACtt/gaGTtt	-	-	-2.707	PROSITE_profiles:PS50023&PTHR24210&PTHR24210:SF10&PS00478&PIRSF_domain:PIRSF038003&Pfam_domain:PF00412&2.10.110.10&SMART_domains:SM00132&Superfamily_domains:SSF57716	focal adhesion [GO:0005925]; zinc ion binding [GO:0008270]; cell-cell junction organization [GO:0045216]; negative regulation of apoptotic process [GO:0043066]; negative regulation of hepatocyte proliferation [GO:2000346]; negative regulation of neural precursor cell proliferation [GO:2000178]; positive regulation of integrin-mediated signaling pathway [GO:2001046]; single organismal cell-cell ad…	no abnormal phenotype observed,muscle,homeostasis,cardiovascular	NO
9	1605241	TA	CG	123510	247	494	494	1	494	0	WA_WD_W1	0:71,0:78,0:98	.:GG-WUR-108_GG-WUR-262_GG-WUR-068_GG-WUR-154_GG-WUR-042_GG-WUR-114_GG-WUR-121_GG-WUR-156_GG-WUR-059_GG-WUR-253_GG-WUR-116_GG-WUR-261_GG-WUR-257_GG-WUR-113_GG-WUR-120_GG-WUR-117_GG-WUR-159_GG-WUR-258_GG-WUR-036_GG-WUR-162_GG-WUR-256_GG-WUR-239_GG-WUR-051_GG-WUR-092_GG-WUR-163_GG-WUR-069_GG-WUR-115_GG-WUR-130_GG-WUR-238_GG-WUR-236_GG-WUR-123_GG-WUR-055_GG-WUR-263_GG-WUR-175_GG-WUR-050_GG-WUR-153_G…	392	0|0|0	splice_acceptor_variant&non_coding_transcript_variant	HIGH	-	ENSGALG00000031091	ENSGALT00000064628	-	1/1	-	-	-	-	-	-	-	NA	-		-	YES
9	1605862	ATATA	ATATTATA	94881.2	244	488	488	1	488	0	WA_WD_W1	0:69,0:77,0:98	.:GG-WUR-108_GG-WUR-262_GG-WUR-068_GG-WUR-154_GG-WUR-042_GG-WUR-114_GG-WUR-121_GG-WUR-156_GG-WUR-059_GG-WUR-253_GG-WUR-116_GG-WUR-261_GG-WUR-257_GG-WUR-113_GG-WUR-120_GG-WUR-117_GG-WUR-159_GG-WUR-258_GG-WUR-036_GG-WUR-162_GG-WUR-256_GG-WUR-239_GG-WUR-051_GG-WUR-092_GG-WUR-163_GG-WUR-069_GG-WUR-115_GG-WUR-130_GG-WUR-238_GG-WUR-236_GG-WUR-123_GG-WUR-055_GG-WUR-263_GG-WUR-175_GG-WUR-050_GG-WUR-153_G…	497	0|0|0	splice_donor_variant&non_coding_transcript_variant	HIGH	-	ENSGALG00000031091	ENSGALT00000064628	-	1/1	-	-	-	-	-	-	-	NA	-		-	YES
9	2279060	A	T	130506	248	496	496	1	496	0	WA_WD_W1	0:71,0:77,0:100	.:GG-WUR-108_GG-WUR-262_GG-WUR-068_GG-WUR-154_GG-WUR-042_GG-WUR-114_GG-WUR-121_GG-WUR-156_GG-WUR-059_GG-WUR-253_GG-WUR-116_GG-WUR-261_GG-WUR-257_GG-WUR-113_GG-WUR-120_GG-WUR-117_GG-WUR-159_GG-WUR-258_GG-WUR-036_GG-WUR-162_GG-WUR-256_GG-WUR-239_GG-WUR-051_GG-WUR-092_GG-WUR-163_GG-WUR-069_GG-WUR-115_GG-WUR-130_GG-WUR-238_GG-WUR-236_GG-WUR-123_GG-WUR-055_GG-WUR-263_GG-WUR-175_GG-WUR-050_GG-WUR-153_G…	237	51|5|0	missense_variant	MODERATE	ARHGEF4	ENSGALG00000002193	ENSGALT00000060686	7/7	-	1117	1117	373	Y/N	Tac/Aac	-	deleterious(0.01)	-1.668	2.30.29.30	intracellular [GO:0005622]; Rac guanyl-nucleotide exchange factor activity [GO:0030676]; filopodium assembly [GO:0046847]; intracellular signal transduction [GO:0035556]; lamellipodium assembly [GO:0030032]; regulation of Rho protein signal transduction [GO:0035023]	skeleton,immune,neoplasm,hematopoietic,behavior,integument,cellular,homeostasis,cardiovascular	YES
9	2678568	A	G	120051	245	490	490	1	490	0	WA_WD_W1	0:70,0:77,0:98	.:GG-WUR-108_GG-WUR-262_GG-WUR-068_GG-WUR-154_GG-WUR-042_GG-WUR-114_GG-WUR-121_GG-WUR-156_GG-WUR-059_GG-WUR-253_GG-WUR-116_GG-WUR-261_GG-WUR-257_GG-WUR-113_GG-WUR-120_GG-WUR-117_GG-WUR-159_GG-WUR-258_GG-WUR-036_GG-WUR-162_GG-WUR-256_GG-WUR-239_GG-WUR-051_GG-WUR-092_GG-WUR-163_GG-WUR-069_GG-WUR-115_GG-WUR-130_GG-WUR-238_GG-WUR-236_GG-WUR-123_GG-WUR-055_GG-WUR-263_GG-WUR-175_GG-WUR-050_GG-WUR-153_G…	1306	50|2|0	missense_variant	MODERATE	DUSP28	ENSGALG00000000399	ENSGALT00000000544	4/4	-	497	467	156	L/P	cTt/cCt	-	deleterious_low_confidence(0.01)	1.559	-	protein tyrosine/serine/threonine phosphatase activity [GO:0008138]; peptidyl-tyrosine dephosphorylation [GO:0035335]	-	YES
9	4759617	A	G	133649	244	488	488	1	488	0	WA_WD_W1	0:70,0:78,0:96	.:GG-WUR-108_GG-WUR-262_GG-WUR-068_GG-WUR-154_GG-WUR-042_GG-WUR-114_GG-WUR-121_GG-WUR-156_GG-WUR-059_GG-WUR-253_GG-WUR-116_GG-WUR-261_GG-WUR-257_GG-WUR-113_GG-WUR-120_GG-WUR-117_GG-WUR-159_GG-WUR-258_GG-WUR-036_GG-WUR-162_GG-WUR-256_GG-WUR-239_GG-WUR-051_GG-WUR-092_GG-WUR-163_GG-WUR-069_GG-WUR-115_GG-WUR-130_GG-WUR-238_GG-WUR-236_GG-WUR-123_GG-WUR-055_GG-WUR-263_GG-WUR-050_GG-WUR-153_GG-WUR-118_G…	992	61|7|0	missense_variant	MODERATE	D2HGDH	ENSGALG00000039535	ENSGALT00000051908	9/9	-	1622	1622	541	L/P	cTc/cCc	-	deleterious(0)	-0.374	-	flavin adenine dinucleotide binding [GO:0050660]; oxidoreductase activity, acting on CH-OH group of donors [GO:0016614]flavin adenine dinucleotide binding [GO:0050660]; oxidoreductase activity, acting on CH-OH group of donors [GO:0016614]flavin adenine dinucleotide binding [GO:0050660]; oxidoreductase activity, acting on CH-OH group of donors [GO:0016614]	-	YES
9	10474850	A	G	106657	233	466	466	1	466	0	WA_WD_W1	0:65,0:76,0:92	.:GG-WUR-108_GG-WUR-262_GG-WUR-068_GG-WUR-154_GG-WUR-042_GG-WUR-114_GG-WUR-121_GG-WUR-156_GG-WUR-059_GG-WUR-253_GG-WUR-116_GG-WUR-257_GG-WUR-113_GG-WUR-120_GG-WUR-117_GG-WUR-159_GG-WUR-258_GG-WUR-036_GG-WUR-162_GG-WUR-256_GG-WUR-239_GG-WUR-051_GG-WUR-092_GG-WUR-163_GG-WUR-069_GG-WUR-115_GG-WUR-130_GG-WUR-236_GG-WUR-123_GG-WUR-055_GG-WUR-175_GG-WUR-050_GG-WUR-153_GG-WUR-118_GG-WUR-259_GG-WUR-111_G…	1403	62|18|0	missense_variant	MODERATE	ATR	ENSGALG00000002663	ENSGALT00000004194	45/47	-	7667	7667	2556	M/T	aTg/aCg	-	deleterious(0.04)	-3.707	PROSITE_profiles:PS50290&PTHR11139&PTHR11139:SF69&1.10.1070.11&Pfam_domain:PF00454&SMART_domains:SM00146&Superfamily_domains:SSF56112	ATP binding [GO:0005524]; protein serine/threonine kinase activity [GO:0004674]Golgi apparatus [GO:0005794]; nucleus [GO:0005634]; PML body [GO:0016605]; ATP binding [GO:0005524]; kinase activity [GO:0016301]; protein serine/threonine kinase activity [GO:0004674]; cellular response to gamma radiation [GO:0071480]; cellular response to UV [GO:0034644]; DNA damage checkpoint [GO:0000077]; DNA repai…	embryo,skeleton,craniofacial,endocrine/exocrine,liver/biliary,integument,homeostasis,cardiovascular,immune,neoplasm,mortality/aging,pigmentation,growth/size/body,cellular,nervous system,respiratory,reproductive,adipose,renal/urinary,no abnormal phenotype observed,hematopoietic,digestive/alimentary	YES
9	12694937	C	G	143807	239	478	478	1	478	0	WA_WD_W1	0:68,0:77,0:94	.:GG-WUR-108_GG-WUR-068_GG-WUR-154_GG-WUR-042_GG-WUR-114_GG-WUR-121_GG-WUR-156_GG-WUR-059_GG-WUR-253_GG-WUR-116_GG-WUR-261_GG-WUR-257_GG-WUR-113_GG-WUR-120_GG-WUR-117_GG-WUR-159_GG-WUR-258_GG-WUR-036_GG-WUR-162_GG-WUR-256_GG-WUR-239_GG-WUR-051_GG-WUR-092_GG-WUR-163_GG-WUR-069_GG-WUR-115_GG-WUR-130_GG-WUR-238_GG-WUR-236_GG-WUR-123_GG-WUR-055_GG-WUR-263_GG-WUR-175_GG-WUR-050_GG-WUR-153_GG-WUR-118_G…	1560	17|5|2	missense_variant	MODERATE	-	ENSGALG00000006976	ENSGALT00000011301	5/5	-	764	764	255	T/S	aCt/aGt	-	deleterious(0.01)	0.083	3.40.50.720	retinol dehydrogenase activity [GO:0004745]; visual perception [GO:0007601]retinol dehydrogenase activity [GO:0004745]; visual perception [GO:0007601]retinol dehydrogenase activity [GO:0004745]; visual perception [GO:0007601]retinol dehydrogenase activity [GO:0004745]; visual perception [GO:0007601]	-	YES
9	13099906	ATA	ATTA	76082.1	215	429	430	0.997674	428	1	WA_WD_W1	0:57,1:67,0:90	.:GG-WUR-108_GG-WUR-262_GG-WUR-068_GG-WUR-154_GG-WUR-042_GG-WUR-114_GG-WUR-121_GG-WUR-156_GG-WUR-059_GG-WUR-116_GG-WUR-261_GG-WUR-257_GG-WUR-113_GG-WUR-120_GG-WUR-159_GG-WUR-036_GG-WUR-162_GG-WUR-239_GG-WUR-051_GG-WUR-163_GG-WUR-069_GG-WUR-115_GG-WUR-130_GG-WUR-238_GG-WUR-123_GG-WUR-055_GG-WUR-175_GG-WUR-050_GG-WUR-153_GG-WUR-118_GG-WUR-111_GG-WUR-134_GG-WUR-119_GG-WUR-088_GG-WUR-147_GG-WUR-096_G…	1142	65|8|0	splice_donor_variant	HIGH	OPA1	ENSGALG00000007150	ENSGALT00000011583	-	6/29	-	-	-	-	-	-	-	NA	-	mitochondrion [GO:0005739]; GTP binding [GO:0005525]; GTPase activity [GO:0003924]; apoptotic process [GO:0006915]; mitochondrion organization [GO:0007005]mitochondrion [GO:0005739]; GTP binding [GO:0005525]; GTPase activity [GO:0003924]; apoptotic process [GO:0006915]; mitochondrion organization [GO:0007005]mitochondrion [GO:0005739]; GTP binding [GO:0005525]; GTPase activity [GO:0003924]; apopt…	embryo,skeleton,craniofacial,adipose,endocrine/exocrine,limbs/digits/tail,vision/eye,cellular,behavior,mortality/aging,nervous system,growth/size/body,homeostasis,cardiovascular	NO
9	15183489	T	C	149949	216	432	432	1	432	0	WA_WD_W1	0:53,0:76,0:87	.:GG-WUR-108_GG-WUR-068_GG-WUR-154_GG-WUR-042_GG-WUR-114_GG-WUR-121_GG-WUR-156_GG-WUR-059_GG-WUR-116_GG-WUR-113_GG-WUR-120_GG-WUR-117_GG-WUR-159_GG-WUR-036_GG-WUR-162_GG-WUR-051_GG-WUR-092_GG-WUR-163_GG-WUR-069_GG-WUR-115_GG-WUR-130_GG-WUR-123_GG-WUR-055_GG-WUR-175_GG-WUR-050_GG-WUR-153_GG-WUR-118_GG-WUR-111_GG-WUR-134_GG-WUR-119_GG-WUR-122_GG-WUR-088_GG-WUR-147_GG-WUR-090_GG-WUR-096_GG-WUR-136_G…	76	0|0|0	splice_acceptor_variant&non_coding_transcript_variant	HIGH	-	ENSGALG00000032791	ENSGALT00000079520	-	1/1	-	-	-	-	-	-	-	NA	-		-	YES
9	16213976	C	G	105707	243	486	486	1	486	0	WA_WD_W1	0:68,0:77,0:98	.:GG-WUR-108_GG-WUR-262_GG-WUR-068_GG-WUR-154_GG-WUR-042_GG-WUR-114_GG-WUR-121_GG-WUR-156_GG-WUR-059_GG-WUR-253_GG-WUR-116_GG-WUR-261_GG-WUR-257_GG-WUR-113_GG-WUR-120_GG-WUR-117_GG-WUR-159_GG-WUR-258_GG-WUR-036_GG-WUR-162_GG-WUR-256_GG-WUR-239_GG-WUR-051_GG-WUR-092_GG-WUR-163_GG-WUR-069_GG-WUR-115_GG-WUR-130_GG-WUR-238_GG-WUR-123_GG-WUR-055_GG-WUR-263_GG-WUR-175_GG-WUR-050_GG-WUR-153_GG-WUR-118_G…	5709	44|0|0	missense_variant	MODERATE	-	ENSGALG00000008646	ENSGALT00000014086	7/8	-	982	982	328	H/D	Cac/Gac	-	tolerated_low_confidence(0.38)	-2.825	Low_complexity_(Seg):seg&PTHR13814&PTHR13814:SF3	blood microparticle [GO:0072562]; endolysosome [GO:0036019]; cysteine-type endopeptidase inhibitor activity [GO:0004869]; heparin binding [GO:0008201]; serine-type endopeptidase inhibitor activity [GO:0004867]; zinc ion binding [GO:0008270]; heme transport [GO:0015886]; negative regulation of fibrinolysis [GO:0051918]; regulation of platelet activation [GO:0010543]	-	YES
9	16214027	A	C	124539	245	490	490	1	490	0	WA_WD_W1	0:68,0:78,0:99	.:GG-WUR-108_GG-WUR-262_GG-WUR-068_GG-WUR-154_GG-WUR-042_GG-WUR-114_GG-WUR-121_GG-WUR-156_GG-WUR-059_GG-WUR-253_GG-WUR-116_GG-WUR-261_GG-WUR-257_GG-WUR-113_GG-WUR-120_GG-WUR-117_GG-WUR-159_GG-WUR-258_GG-WUR-036_GG-WUR-162_GG-WUR-256_GG-WUR-239_GG-WUR-051_GG-WUR-092_GG-WUR-163_GG-WUR-069_GG-WUR-115_GG-WUR-130_GG-WUR-236_GG-WUR-123_GG-WUR-055_GG-WUR-263_GG-WUR-175_GG-WUR-050_GG-WUR-153_GG-WUR-118_G…	4349	44|0|0	missense_variant	MODERATE	-	ENSGALG00000008646	ENSGALT00000014086	7/8	-	1033	1033	345	T/P	Aca/Cca	-	deleterious_low_confidence(0.02)	0.001	Low_complexity_(Seg):seg&PTHR13814&PTHR13814:SF3	blood microparticle [GO:0072562]; endolysosome [GO:0036019]; cysteine-type endopeptidase inhibitor activity [GO:0004869]; heparin binding [GO:0008201]; serine-type endopeptidase inhibitor activity [GO:0004867]; zinc ion binding [GO:0008270]; heme transport [GO:0015886]; negative regulation of fibrinolysis [GO:0051918]; regulation of platelet activation [GO:0010543]	-	YES
9	16215579	T	C	46909.9	195	379	390	0.971795	368	11	WA_WD_W1	8:51,0:61,3:72	GG-WUR-262_GG-WUR-253_GG-WUR-256_GG-WUR-238_GG-WUR-259_GG-WUR-252_GG-WUR-254_GG-WUR-237:GG-WUR-108_GG-WUR-068_GG-WUR-154_GG-WUR-042_GG-WUR-114_GG-WUR-156_GG-WUR-059_GG-WUR-116_GG-WUR-257_GG-WUR-113_GG-WUR-117_GG-WUR-159_GG-WUR-258_GG-WUR-036_GG-WUR-162_GG-WUR-051_GG-WUR-092_GG-WUR-163_GG-WUR-069_GG-WUR-115_GG-WUR-130_GG-WUR-236_GG-WUR-123_GG-WUR-055_GG-WUR-263_GG-WUR-175_GG-WUR-153_GG-WUR-118_GG-…	728	44|0|0	missense_variant	MODERATE	-	ENSGALG00000008646	ENSGALT00000014086	8/8	-	1565	1565	522	L/P	cTt/cCt	-	deleterious_low_confidence(0)	0.03	-	blood microparticle [GO:0072562]; endolysosome [GO:0036019]; cysteine-type endopeptidase inhibitor activity [GO:0004869]; heparin binding [GO:0008201]; serine-type endopeptidase inhibitor activity [GO:0004867]; zinc ion binding [GO:0008270]; heme transport [GO:0015886]; negative regulation of fibrinolysis [GO:0051918]; regulation of platelet activation [GO:0010543]	-	YES
9	20021887	C	T	111814	237	474	474	1	474	0	WA_WD_W1	0:62,0:77,0:98	.:GG-WUR-108_GG-WUR-068_GG-WUR-154_GG-WUR-042_GG-WUR-114_GG-WUR-121_GG-WUR-156_GG-WUR-059_GG-WUR-253_GG-WUR-116_GG-WUR-113_GG-WUR-120_GG-WUR-159_GG-WUR-258_GG-WUR-036_GG-WUR-162_GG-WUR-239_GG-WUR-051_GG-WUR-092_GG-WUR-163_GG-WUR-069_GG-WUR-115_GG-WUR-130_GG-WUR-238_GG-WUR-123_GG-WUR-055_GG-WUR-263_GG-WUR-175_GG-WUR-050_GG-WUR-153_GG-WUR-118_GG-WUR-111_GG-WUR-254_GG-WUR-134_GG-WUR-119_GG-WUR-122_G…	732	61|11|0	missense_variant	MODERATE	LRRC34	ENSGALG00000009402	ENSGALT00000015314	3/11	-	1078	217	73	R/C	Cgc/Tgc	-	-	-2.852	PTHR24111&PTHR24111:SF0&3.80.10.10&Superfamily_domains:SSF52047	-	-	YES
9	20680504	C	T	101141	238	476	476	1	476	0	WA_WD_W1	0:66,0:76,0:96	.:GG-WUR-108_GG-WUR-262_GG-WUR-068_GG-WUR-154_GG-WUR-042_GG-WUR-114_GG-WUR-121_GG-WUR-156_GG-WUR-059_GG-WUR-253_GG-WUR-116_GG-WUR-261_GG-WUR-257_GG-WUR-113_GG-WUR-120_GG-WUR-117_GG-WUR-159_GG-WUR-036_GG-WUR-162_GG-WUR-256_GG-WUR-239_GG-WUR-051_GG-WUR-092_GG-WUR-163_GG-WUR-069_GG-WUR-115_GG-WUR-130_GG-WUR-238_GG-WUR-236_GG-WUR-123_GG-WUR-055_GG-WUR-263_GG-WUR-175_GG-WUR-050_GG-WUR-153_GG-WUR-118_G…	3571	62|3|10	start_lost	HIGH	SERPINI1	ENSGALG00000009470	ENSGALT00000015416	2/9	-	85	3	1	M/I	atG/atA	-	-	NA	Cleavage_site_(Signalp):SignalP-noTM	extracellular space [GO:0005615]; serine-type endopeptidase inhibitor activity [GO:0004867]extracellular space [GO:0005615]	nervous system,behavior,no abnormal phenotype observed	YES
9	23603206	GCTCCTCCTCCTCCTCCTCCTCC	GCTCCTCCTCCTCCTCCTCC	73033.9	234	427	468	0.912393	400	27	WA_WD_W1	16:48,11:54,0:98	GG-WUR-108_GG-WUR-154_GG-WUR-116_GG-WUR-261_GG-WUR-036_GG-WUR-051_GG-WUR-055_GG-WUR-153_GG-WUR-111_GG-WUR-134_GG-WUR-088_GG-WUR-096_GG-WUR-135_GG-WUR-260_GG-WUR-255_GG-WUR-237:GG-WUR-068_GG-WUR-042_GG-WUR-114_GG-WUR-156_GG-WUR-059_GG-WUR-113_GG-WUR-120_GG-WUR-117_GG-WUR-159_GG-WUR-258_GG-WUR-162_GG-WUR-256_GG-WUR-239_GG-WUR-092_GG-WUR-163_GG-WUR-069_GG-WUR-115_GG-WUR-130_GG-WUR-238_GG-WUR-236_GG-…	766	45|13|0	inframe_deletion	MODERATE	MED12L	ENSGALG00000010370	ENSGALT00000016895	33/37	-	4779-4800	4779-4800	1593-1600	PEEEEEEE/PEEEEEE	ccGGAGGAGGAGGAGGAGGAGGAG/ccGGAGGAGGAGGAGGAGGAG	-	-	4.905	Low_complexity_(Seg):seg&PTHR13992:SF22&PTHR13992	mediator complex [GO:0016592]; RNA polymerase II transcription cofactor activity [GO:0001104]mediator complex [GO:0016592]; RNA polymerase II transcription coactivator activity [GO:0001105]	-	NO
10	2989879	G	A	127474	247	494	494	1	494	0	WA_WD_W1	0:71,0:76,0:100	.:GG-WUR-108_GG-WUR-262_GG-WUR-068_GG-WUR-154_GG-WUR-042_GG-WUR-114_GG-WUR-121_GG-WUR-156_GG-WUR-059_GG-WUR-253_GG-WUR-116_GG-WUR-261_GG-WUR-257_GG-WUR-113_GG-WUR-120_GG-WUR-117_GG-WUR-159_GG-WUR-258_GG-WUR-036_GG-WUR-162_GG-WUR-256_GG-WUR-239_GG-WUR-051_GG-WUR-092_GG-WUR-163_GG-WUR-069_GG-WUR-115_GG-WUR-130_GG-WUR-238_GG-WUR-236_GG-WUR-123_GG-WUR-055_GG-WUR-263_GG-WUR-175_GG-WUR-050_GG-WUR-153_G…	3233	60|8|0	missense_variant	MODERATE	PEAK1	ENSGALG00000002759	ENSGALT00000004357	1/4	-	1960	1960	654	G/R	Gga/Aga	-	deleterious(0.02)	-5.03	PTHR22972:SF5&PTHR22972	actin cytoskeleton [GO:0015629]; cytoplasm [GO:0005737]; focal adhesion [GO:0005925]; nucleoplasm [GO:0005654]; plasma membrane [GO:0005886]; ATP binding [GO:0005524]; non-membrane spanning protein tyrosine kinase activity [GO:0004715]; protein kinase activity [GO:0004672]; cell migration [GO:0016477]; protein autophosphorylation [GO:0046777]; substrate adhesion-dependent cell spreading [GO:00344…	mortality/aging	YES
10	3137044	A	G	103938	243	486	486	1	486	0	WA_WD_W1	0:69,0:74,0:100	.:GG-WUR-108_GG-WUR-262_GG-WUR-068_GG-WUR-154_GG-WUR-042_GG-WUR-114_GG-WUR-121_GG-WUR-156_GG-WUR-059_GG-WUR-253_GG-WUR-116_GG-WUR-261_GG-WUR-257_GG-WUR-113_GG-WUR-120_GG-WUR-117_GG-WUR-159_GG-WUR-258_GG-WUR-036_GG-WUR-162_GG-WUR-256_GG-WUR-239_GG-WUR-051_GG-WUR-092_GG-WUR-163_GG-WUR-069_GG-WUR-115_GG-WUR-130_GG-WUR-238_GG-WUR-236_GG-WUR-123_GG-WUR-175_GG-WUR-050_GG-WUR-153_GG-WUR-118_GG-WUR-259_G…	598	63|8|0	missense_variant	MODERATE	SCAPER	ENSGALG00000002883	ENSGALT00000004548	2/32	-	2017-01-26	2017-01-26	2017-01-09	N/S	aAc/aGc	-	deleterious_low_confidence(0)	-0.668	PTHR31434&PTHR31434:SF2	cytoplasm [GO:0005737]; nucleus [GO:0005634]; nucleic acid binding [GO:0003676]; zinc ion binding [GO:0008270]	-	YES
10	3268307	CTTTTTTTC	CTTTTTTTTC	120490	246	491	492	0.997967	490	1	WA_WD_W1	1:69,0:77,0:99	GG-WUR-162:GG-WUR-108_GG-WUR-262_GG-WUR-068_GG-WUR-154_GG-WUR-042_GG-WUR-114_GG-WUR-121_GG-WUR-156_GG-WUR-059_GG-WUR-253_GG-WUR-116_GG-WUR-261_GG-WUR-257_GG-WUR-113_GG-WUR-120_GG-WUR-117_GG-WUR-159_GG-WUR-258_GG-WUR-036_GG-WUR-256_GG-WUR-239_GG-WUR-051_GG-WUR-092_GG-WUR-163_GG-WUR-069_GG-WUR-115_GG-WUR-130_GG-WUR-238_GG-WUR-236_GG-WUR-055_GG-WUR-263_GG-WUR-175_GG-WUR-050_GG-WUR-153_GG-WUR-118_GG-…	430	63|8|0	splice_acceptor_variant&intron_variant	HIGH	SCAPER	ENSGALG00000002883	ENSGALT00000004548	-	28/31	-	-	-	-	-	-	-	NA	-	cytoplasm [GO:0005737]; nucleus [GO:0005634]; nucleic acid binding [GO:0003676]; zinc ion binding [GO:0008270]	-	NO
10	3328637	A	G	139122	243	486	486	1	486	0	WA_WD_W1	0:69,0:77,0:97	.:GG-WUR-108_GG-WUR-262_GG-WUR-068_GG-WUR-154_GG-WUR-042_GG-WUR-114_GG-WUR-121_GG-WUR-156_GG-WUR-059_GG-WUR-253_GG-WUR-116_GG-WUR-261_GG-WUR-257_GG-WUR-113_GG-WUR-120_GG-WUR-117_GG-WUR-159_GG-WUR-258_GG-WUR-036_GG-WUR-162_GG-WUR-256_GG-WUR-239_GG-WUR-051_GG-WUR-092_GG-WUR-163_GG-WUR-069_GG-WUR-115_GG-WUR-130_GG-WUR-236_GG-WUR-123_GG-WUR-055_GG-WUR-263_GG-WUR-175_GG-WUR-050_GG-WUR-153_GG-WUR-118_G…	375	48|18|0	missense_variant	MODERATE	TMEM266	ENSGALG00000002945	ENSGALT00000004657	10/10	-	1324	1324	442	C/R	Tgc/Cgc	-	deleterious_low_confidence(0.04)	-7.454	PTHR12305	integral component of membrane [GO:0016021]; ion channel activity [GO:0005216]	-	YES
10	3380094	A	G	97705.6	243	445	486	0.915638	416	29	WA_WD_W1	0:67,29:43,0:98	.:GG-WUR-108_GG-WUR-262_GG-WUR-068_GG-WUR-154_GG-WUR-042_GG-WUR-114_GG-WUR-121_GG-WUR-156_GG-WUR-059_GG-WUR-116_GG-WUR-261_GG-WUR-257_GG-WUR-113_GG-WUR-120_GG-WUR-117_GG-WUR-159_GG-WUR-036_GG-WUR-162_GG-WUR-256_GG-WUR-239_GG-WUR-051_GG-WUR-092_GG-WUR-163_GG-WUR-069_GG-WUR-115_GG-WUR-130_GG-WUR-238_GG-WUR-236_GG-WUR-123_GG-WUR-055_GG-WUR-175_GG-WUR-050_GG-WUR-153_GG-WUR-118_GG-WUR-259_GG-WUR-252_G…	851	48|18|0	missense_variant	MODERATE	TMEM266	ENSGALG00000002945	ENSGALT00000063220	3/11	-	172	172	58	Y/H	Tat/Cat	-	deleterious_low_confidence(0.03)	1.085	-	integral component of membrane [GO:0016021]; ion channel activity [GO:0005216]	-	YES
10	3574751	C	A	88921.4	234	428	468	0.91453	402	26	WA_WD_W1	0:62,26:43,0:96	.:GG-WUR-108_GG-WUR-262_GG-WUR-068_GG-WUR-154_GG-WUR-042_GG-WUR-114_GG-WUR-121_GG-WUR-156_GG-WUR-059_GG-WUR-253_GG-WUR-116_GG-WUR-113_GG-WUR-120_GG-WUR-159_GG-WUR-258_GG-WUR-036_GG-WUR-162_GG-WUR-256_GG-WUR-239_GG-WUR-051_GG-WUR-092_GG-WUR-163_GG-WUR-069_GG-WUR-130_GG-WUR-238_GG-WUR-123_GG-WUR-055_GG-WUR-263_GG-WUR-175_GG-WUR-050_GG-WUR-153_GG-WUR-118_GG-WUR-259_GG-WUR-252_GG-WUR-111_GG-WUR-134_G…	560	55|1|11	splice_donor_variant	HIGH	CHRNA5	ENSGALG00000003021	ENSGALT00000051165	-	3/6	-	-	-	-	-	-	-	NA	-	cell junction [GO:0030054]; integral component of membrane [GO:0016021]; postsynaptic membrane [GO:0045211]; acetylcholine-activated cation-selective channel activity [GO:0004889]acetylcholine-gated channel complex [GO:0005892]; cell junction [GO:0030054]; postsynaptic membrane [GO:0045211]; acetylcholine receptor activity [GO:0015464]; acetylcholine-activated cation-selective channel activity [G…	nervous system,behavior	YES
10	5460620	CAGCCCGA	CAGCCCGAGCCCGA	67798.8	245	460	490	0.938776	436	24	WA_WD_W1	0:70,23:51,1:97	.:GG-WUR-108_GG-WUR-262_GG-WUR-068_GG-WUR-154_GG-WUR-042_GG-WUR-114_GG-WUR-121_GG-WUR-156_GG-WUR-059_GG-WUR-253_GG-WUR-116_GG-WUR-261_GG-WUR-257_GG-WUR-113_GG-WUR-120_GG-WUR-117_GG-WUR-159_GG-WUR-258_GG-WUR-036_GG-WUR-162_GG-WUR-256_GG-WUR-051_GG-WUR-092_GG-WUR-163_GG-WUR-069_GG-WUR-115_GG-WUR-130_GG-WUR-238_GG-WUR-236_GG-WUR-123_GG-WUR-055_GG-WUR-263_GG-WUR-175_GG-WUR-050_GG-WUR-153_GG-WUR-118_G…	620	57|1|0	inframe_insertion	MODERATE	OTUD7A	ENSGALG00000003802	ENSGALT00000006032	2/14	-	257-263	257-263	86-88	QPE/QPEPE	cAGCCCGAg/cAGCCCGAGCCCGAg	-	-	2.554	PTHR13367:SF9&PTHR13367	cytoplasm [GO:0005737]; nucleus [GO:0005634]; DNA binding [GO:0003677]; K63-linked polyubiquitin binding [GO:0070530]; thiol-dependent ubiquitin-specific protease activity [GO:0004843]; zinc ion binding [GO:0008270]; immune response [GO:0006955]; negative regulation of I-kappaB kinase/NF-kappaB signaling [GO:0043124]; protein deubiquitination involved in ubiquitin-dependent protein catabolic proc…	-	YES
10	7937061	C	G	107212	234	468	468	1	468	0	WA_WD_W1	0:58,0:77,0:99	.:GG-WUR-108_GG-WUR-262_GG-WUR-068_GG-WUR-154_GG-WUR-042_GG-WUR-121_GG-WUR-156_GG-WUR-059_GG-WUR-116_GG-WUR-113_GG-WUR-120_GG-WUR-117_GG-WUR-159_GG-WUR-036_GG-WUR-162_GG-WUR-239_GG-WUR-051_GG-WUR-092_GG-WUR-069_GG-WUR-115_GG-WUR-130_GG-WUR-238_GG-WUR-236_GG-WUR-123_GG-WUR-055_GG-WUR-175_GG-WUR-050_GG-WUR-153_GG-WUR-118_GG-WUR-111_GG-WUR-254_GG-WUR-134_GG-WUR-119_GG-WUR-122_GG-WUR-088_GG-WUR-147_G…	471	61|4|0	stop_gained	HIGH	CCPG1	ENSGALG00000004387	ENSGALT00000048430	2/13	-	947	5	2	S/*	tCa/tGa	-	-	NA	-	integral component of membrane [GO:0016021]; cell cycle [GO:0007049]; regulation of Rho guanyl-nucleotide exchange factor activity [GO:2001106]regulation of Rho guanyl-nucleotide exchange factor activity [GO:2001106]integral component of membrane [GO:0016021]; regulation of Rho guanyl-nucleotide exchange factor activity [GO:2001106]	-	NO
10	10662982	G	C	97127.7	234	453	468	0.967949	444	9	WA_WD_W1	9:50,0:75,0:97	GG-WUR-068_GG-WUR-042_GG-WUR-156_GG-WUR-116_GG-WUR-162_GG-WUR-238_GG-WUR-096_GG-WUR-164_GG-WUR-260:GG-WUR-108_GG-WUR-114_GG-WUR-121_GG-WUR-059_GG-WUR-253_GG-WUR-261_GG-WUR-113_GG-WUR-120_GG-WUR-159_GG-WUR-036_GG-WUR-239_GG-WUR-051_GG-WUR-092_GG-WUR-163_GG-WUR-069_GG-WUR-115_GG-WUR-130_GG-WUR-236_GG-WUR-123_GG-WUR-055_GG-WUR-263_GG-WUR-175_GG-WUR-050_GG-WUR-153_GG-WUR-118_GG-WUR-252_GG-WUR-134_GG-…	346	60|3|0	missense_variant	MODERATE	-	ENSGALG00000005682	ENSGALT00000009112	4/8	-	549	425	142	S/T	aGt/aCt	-	deleterious(0.02)	-2.479	PTHR23077&PTHR23077:SF76&3.40.50.300&Pfam_domain:PF00004&SMART_domains:SM00382&Superfamily_domains:SSF52540	ATP binding [GO:0005524]	-	YES
10	11281461	A	G	124504	244	488	488	1	488	0	WA_WD_W1	0:68,0:77,0:99	.:GG-WUR-108_GG-WUR-262_GG-WUR-068_GG-WUR-154_GG-WUR-042_GG-WUR-114_GG-WUR-121_GG-WUR-156_GG-WUR-059_GG-WUR-253_GG-WUR-116_GG-WUR-261_GG-WUR-257_GG-WUR-113_GG-WUR-120_GG-WUR-117_GG-WUR-159_GG-WUR-258_GG-WUR-036_GG-WUR-162_GG-WUR-256_GG-WUR-239_GG-WUR-051_GG-WUR-092_GG-WUR-163_GG-WUR-069_GG-WUR-115_GG-WUR-130_GG-WUR-238_GG-WUR-236_GG-WUR-123_GG-WUR-055_GG-WUR-263_GG-WUR-175_GG-WUR-050_GG-WUR-153_G…	-5	0|0|0	splice_acceptor_variant&non_coding_transcript_variant	HIGH	-	ENSGALG00000032878	ENSGALT00000059549	-	2/4	-	-	-	-	-	-	-	NA	-		-	YES
10	12415963	A	C	110852	247	494	494	1	494	0	WA_WD_W1	0:70,0:77,0:100	.:GG-WUR-108_GG-WUR-262_GG-WUR-068_GG-WUR-154_GG-WUR-042_GG-WUR-114_GG-WUR-121_GG-WUR-156_GG-WUR-059_GG-WUR-253_GG-WUR-116_GG-WUR-261_GG-WUR-257_GG-WUR-113_GG-WUR-120_GG-WUR-117_GG-WUR-159_GG-WUR-258_GG-WUR-036_GG-WUR-162_GG-WUR-256_GG-WUR-239_GG-WUR-051_GG-WUR-092_GG-WUR-163_GG-WUR-069_GG-WUR-115_GG-WUR-130_GG-WUR-238_GG-WUR-236_GG-WUR-123_GG-WUR-055_GG-WUR-263_GG-WUR-175_GG-WUR-050_GG-WUR-153_G…	422	58|8|0	missense_variant&splice_region_variant	MODERATE	ARNT2	ENSGALG00000006445	ENSGALT00000010400	17/19	-	1706	1706	569	L/R	cTg/cGg	-	deleterious_low_confidence(0.05)	1	PTHR23042:SF6&PTHR23042	cytoplasm [GO:0005737]; nucleus [GO:0005634]; transcription factor complex [GO:0005667]; transcription factor activity, sequence-specific DNA binding [GO:0003700]; transcription, DNA-templated [GO:0006351]cytoplasm [GO:0005737]; nucleus [GO:0005634]; transcription factor complex [GO:0005667]; DNA binding [GO:0003677]; transcription factor activity, sequence-specific DNA binding [GO:0003700]; tran…	mortality/aging,nervous system,homeostasis,cellular,endocrine/exocrine	YES
10	12841069	C	T	112063	248	496	496	1	496	0	WA_WD_W1	0:71,0:78,0:99	.:GG-WUR-108_GG-WUR-262_GG-WUR-068_GG-WUR-154_GG-WUR-042_GG-WUR-114_GG-WUR-121_GG-WUR-156_GG-WUR-059_GG-WUR-253_GG-WUR-116_GG-WUR-261_GG-WUR-257_GG-WUR-113_GG-WUR-120_GG-WUR-117_GG-WUR-159_GG-WUR-258_GG-WUR-036_GG-WUR-162_GG-WUR-256_GG-WUR-239_GG-WUR-051_GG-WUR-092_GG-WUR-163_GG-WUR-069_GG-WUR-115_GG-WUR-130_GG-WUR-238_GG-WUR-236_GG-WUR-123_GG-WUR-055_GG-WUR-263_GG-WUR-175_GG-WUR-050_GG-WUR-153_G…	457	59|4|0	missense_variant	MODERATE	TICRR	ENSGALG00000006631	ENSGALT00000010711	20/22	-	4678	4604	1535	C/Y	tGt/tAt	-	deleterious(0.03)	-5.363	PTHR21556	nucleoplasm [GO:0005654]; chromatin binding [GO:0003682]; DNA replication [GO:0006260]; mitotic DNA replication checkpoint [GO:0033314]; regulation of DNA-dependent DNA replication initiation [GO:0030174]; response to ionizing radiation [GO:0010212]	integument	YES
10	14323559	T	C	123115	249	498	498	1	498	0	WA_WD_W1	0:70,0:78,0:101	.:GG-WUR-108_GG-WUR-262_GG-WUR-068_GG-WUR-154_GG-WUR-042_GG-WUR-114_GG-WUR-121_GG-WUR-156_GG-WUR-059_GG-WUR-253_GG-WUR-116_GG-WUR-261_GG-WUR-257_GG-WUR-113_GG-WUR-120_GG-WUR-117_GG-WUR-159_GG-WUR-258_GG-WUR-036_GG-WUR-162_GG-WUR-256_GG-WUR-239_GG-WUR-051_GG-WUR-092_GG-WUR-163_GG-WUR-069_GG-WUR-115_GG-WUR-130_GG-WUR-238_GG-WUR-236_GG-WUR-123_GG-WUR-055_GG-WUR-263_GG-WUR-175_GG-WUR-050_GG-WUR-153_G…	-48	0|0|0	splice_donor_variant&non_coding_transcript_variant	HIGH	-	ENSGALG00000042855	ENSGALT00000056752	-	1/4	-	-	-	-	-	-	-	NA	-		-	YES
10	19502184	G	T	111622	242	484	484	1	484	0	WA_WD_W1	0:69,0:76,0:97	.:GG-WUR-108_GG-WUR-262_GG-WUR-068_GG-WUR-154_GG-WUR-042_GG-WUR-114_GG-WUR-121_GG-WUR-156_GG-WUR-059_GG-WUR-253_GG-WUR-116_GG-WUR-261_GG-WUR-257_GG-WUR-113_GG-WUR-120_GG-WUR-117_GG-WUR-159_GG-WUR-258_GG-WUR-036_GG-WUR-162_GG-WUR-256_GG-WUR-239_GG-WUR-051_GG-WUR-092_GG-WUR-163_GG-WUR-069_GG-WUR-115_GG-WUR-130_GG-WUR-238_GG-WUR-236_GG-WUR-123_GG-WUR-055_GG-WUR-263_GG-WUR-175_GG-WUR-050_GG-WUR-153_G…	437	47|24|6	missense_variant	MODERATE	TLE3	ENSGALG00000008120	ENSGALT00000013179	17/18	-	2098	2098	700	R/S	Cgc/Agc	-	deleterious(0)	-5.62	2.130.10.10&SMART_domains:SM00320&Superfamily_domains:SSF50978&PROSITE_profiles:PS50294&PTHR10814&Prints_domain:PR01850	nucleus [GO:0005634]; regulation of transcription, DNA-templated [GO:0006355]nucleus [GO:0005634]; regulation of transcription, DNA-templated [GO:0006355]	embryo,behavior,growth/size/body,adipose,endocrine/exocrine,liver/biliary,cellular,mortality/aging,homeostasis	NO
10	19775594	G	A	128423	245	490	490	1	490	0	WA_WD_W1	0:68,0:78,0:99	.:GG-WUR-108_GG-WUR-262_GG-WUR-068_GG-WUR-154_GG-WUR-042_GG-WUR-114_GG-WUR-121_GG-WUR-156_GG-WUR-059_GG-WUR-253_GG-WUR-116_GG-WUR-261_GG-WUR-113_GG-WUR-120_GG-WUR-117_GG-WUR-159_GG-WUR-258_GG-WUR-036_GG-WUR-162_GG-WUR-256_GG-WUR-239_GG-WUR-051_GG-WUR-092_GG-WUR-163_GG-WUR-069_GG-WUR-115_GG-WUR-130_GG-WUR-236_GG-WUR-123_GG-WUR-055_GG-WUR-263_GG-WUR-175_GG-WUR-050_GG-WUR-153_GG-WUR-118_GG-WUR-259_G…	1424	60|12|0	missense_variant	MODERATE	SPG11	ENSGALG00000008180	ENSGALT00000038202	25/40	-	4175	4175	1392	R/H	cGt/cAt	-	deleterious(0.04)	1	PTHR13650&PTHR13650:SF0	axon [GO:0030424]; cytoplasmic vesicle [GO:0031410]; cytosol [GO:0005829]; dendrite [GO:0030425]; extracellular exosome [GO:0070062]; lysosomal membrane [GO:0005765]; nucleolus [GO:0005730]; plasma membrane [GO:0005886]; synapse [GO:0045202]; axo-dendritic transport [GO:0008088]; axon extension [GO:0048675]; chemical synaptic transmission [GO:0007268]; phagosome-lysosome fusion involved in apopto…	growth/size/body,nervous system,cellular,behavior	YES
10	19954963	A	G	137030	229	457	458	0.997817	456	1	WA_WD_W1	1:58,0:77,0:93	GG-WUR-036:GG-WUR-108_GG-WUR-068_GG-WUR-154_GG-WUR-042_GG-WUR-114_GG-WUR-121_GG-WUR-156_GG-WUR-059_GG-WUR-116_GG-WUR-113_GG-WUR-120_GG-WUR-117_GG-WUR-159_GG-WUR-258_GG-WUR-162_GG-WUR-051_GG-WUR-092_GG-WUR-163_GG-WUR-069_GG-WUR-115_GG-WUR-130_GG-WUR-238_GG-WUR-236_GG-WUR-123_GG-WUR-055_GG-WUR-175_GG-WUR-050_GG-WUR-153_GG-WUR-118_GG-WUR-111_GG-WUR-134_GG-WUR-119_GG-WUR-122_GG-WUR-088_GG-WUR-147_GG-…	1773	57|2|0	start_lost	HIGH	CTSH	ENSGALG00000033557	ENSGALT00000071673	6/11	-	667	2	1	M/T	aTg/aCg	-	deleterious_low_confidence(0)	NA	SMART_domains:SM00645	cysteine-type peptidase activity [GO:0008234]cysteine-type peptidase activity [GO:0008234]	respiratory,vision/eye	YES
10	20093954	GC	AT	147013	215	388	430	0.902326	348	40	WA_WD_W1	0:54,0:75,40:45	.:GG-WUR-108_GG-WUR-068_GG-WUR-154_GG-WUR-042_GG-WUR-114_GG-WUR-121_GG-WUR-156_GG-WUR-059_GG-WUR-116_GG-WUR-113_GG-WUR-120_GG-WUR-117_GG-WUR-159_GG-WUR-036_GG-WUR-162_GG-WUR-051_GG-WUR-092_GG-WUR-163_GG-WUR-069_GG-WUR-115_GG-WUR-130_GG-WUR-236_GG-WUR-123_GG-WUR-055_GG-WUR-175_GG-WUR-050_GG-WUR-153_GG-WUR-118_GG-WUR-111_GG-WUR-134_GG-WUR-119_GG-WUR-122_GG-WUR-088_GG-WUR-090_GG-WUR-096_GG-WUR-136_G…	662	60|7|0	splice_donor_variant	HIGH	VPS33B	ENSGALG00000012833	ENSGALT00000080045	-	18/21	-	-	-	-	-	-	-	NA	-	vesicle docking involved in exocytosis [GO:0006904]vesicle docking involved in exocytosis [GO:0006904]	skeleton,immune,hematopoietic,mortality/aging,integument,muscle,homeostasis	YES
11	391068	C	T	122814	246	492	492	1	492	0	WA_WD_W1	0:69,0:78,0:99	.:GG-WUR-108_GG-WUR-262_GG-WUR-068_GG-WUR-154_GG-WUR-042_GG-WUR-114_GG-WUR-121_GG-WUR-156_GG-WUR-059_GG-WUR-116_GG-WUR-261_GG-WUR-257_GG-WUR-113_GG-WUR-120_GG-WUR-117_GG-WUR-159_GG-WUR-258_GG-WUR-036_GG-WUR-162_GG-WUR-256_GG-WUR-239_GG-WUR-051_GG-WUR-092_GG-WUR-163_GG-WUR-069_GG-WUR-115_GG-WUR-130_GG-WUR-238_GG-WUR-236_GG-WUR-123_GG-WUR-055_GG-WUR-263_GG-WUR-175_GG-WUR-050_GG-WUR-153_GG-WUR-118_G…	284	28|4|0	missense_variant&splice_region_variant	MODERATE	TLR21	ENSGALG00000033068	ENSGALT00000077967	1/2	-	47	25	9	R/W	Cgg/Tgg	-	deleterious_low_confidence(0)	1	Cleavage_site_(Signalp):SignalP-noTM&PTHR24365&PTHR24365:SF337	integral component of membrane [GO:0016021]; inflammatory response [GO:0006954]; signal transduction [GO:0007165]	-	YES
11	1681993	C	T	115753	250	457	500	0.914	418	39	WA_WD_W1	28:41,0:78,11:90	GG-WUR-108_GG-WUR-114_GG-WUR-121_GG-WUR-253_GG-WUR-261_GG-WUR-113_GG-WUR-120_GG-WUR-117_GG-WUR-256_GG-WUR-051_GG-WUR-163_GG-WUR-055_GG-WUR-263_GG-WUR-118_GG-WUR-259_GG-WUR-119_GG-WUR-122_GG-WUR-088_GG-WUR-090_GG-WUR-136_GG-WUR-160_GG-WUR-135_GG-WUR-164_GG-WUR-039_GG-WUR-056_GG-WUR-143_GG-WUR-035_GG-WUR-237:GG-WUR-262_GG-WUR-068_GG-WUR-154_GG-WUR-042_GG-WUR-156_GG-WUR-059_GG-WUR-116_GG-WUR-159_GG-…	214	48|42|0	missense_variant	MODERATE	HYDIN	ENSGALG00000002407	ENSGALT00000003789	41/84	-	1918-03-18	1918-03-18	1906-01-26	H/Y	Cac/Tac	-	tolerated(0.36)	-3.367	PTHR23053&PTHR23053:SF16	axonemal central pair projection [GO:1990718]; axonemal central apparatus assembly [GO:1904158]; cilium movement [GO:0003341]; epithelial cell development [GO:0002064]; trachea development [GO:0060438]; ventricular system development [GO:0021591]cilium movement [GO:0003341]	respiratory,cellular,reproductive,growth/size/body,endocrine/exocrine,immune,muscle,behavior,mortality/aging,nervous system,skeleton,craniofacial,hematopoietic,cardiovascular	YES
11	1775448	T	C	126833	246	492	492	1	492	0	WA_WD_W1	0:69,0:76,0:101	.:GG-WUR-108_GG-WUR-262_GG-WUR-068_GG-WUR-154_GG-WUR-042_GG-WUR-114_GG-WUR-121_GG-WUR-156_GG-WUR-059_GG-WUR-253_GG-WUR-116_GG-WUR-261_GG-WUR-113_GG-WUR-120_GG-WUR-117_GG-WUR-159_GG-WUR-258_GG-WUR-036_GG-WUR-162_GG-WUR-256_GG-WUR-239_GG-WUR-051_GG-WUR-092_GG-WUR-163_GG-WUR-069_GG-WUR-130_GG-WUR-238_GG-WUR-236_GG-WUR-123_GG-WUR-055_GG-WUR-263_GG-WUR-175_GG-WUR-050_GG-WUR-153_GG-WUR-118_GG-WUR-259_G…	150	0|0|0	splice_acceptor_variant&non_coding_transcript_variant	HIGH	-	ENSGALG00000043317	ENSGALT00000073504	-	1/1	-	-	-	-	-	-	-	NA	-		-	YES
11	1827901	T	G	123397	243	486	486	1	486	0	WA_WD_W1	0:68,0:78,0:97	.:GG-WUR-108_GG-WUR-068_GG-WUR-154_GG-WUR-042_GG-WUR-114_GG-WUR-121_GG-WUR-156_GG-WUR-059_GG-WUR-253_GG-WUR-116_GG-WUR-261_GG-WUR-257_GG-WUR-113_GG-WUR-120_GG-WUR-117_GG-WUR-159_GG-WUR-258_GG-WUR-036_GG-WUR-162_GG-WUR-256_GG-WUR-239_GG-WUR-051_GG-WUR-092_GG-WUR-163_GG-WUR-069_GG-WUR-115_GG-WUR-130_GG-WUR-238_GG-WUR-236_GG-WUR-123_GG-WUR-055_GG-WUR-263_GG-WUR-175_GG-WUR-050_GG-WUR-153_GG-WUR-118_G…	435	60|6|0	splice_acceptor_variant	HIGH	FUK	ENSGALG00000002648	ENSGALT00000004174	-	14/19	-	-	-	-	-	-	-	NA	-	ATP binding [GO:0005524]; fucokinase activity [GO:0050201]; carbohydrate phosphorylation [GO:0046835]	-	YES
11	2089738	T	C	118197	246	492	492	1	492	0	WA_WD_W1	0:71,0:76,0:99	.:GG-WUR-108_GG-WUR-262_GG-WUR-068_GG-WUR-154_GG-WUR-042_GG-WUR-114_GG-WUR-121_GG-WUR-156_GG-WUR-059_GG-WUR-253_GG-WUR-116_GG-WUR-261_GG-WUR-257_GG-WUR-113_GG-WUR-120_GG-WUR-117_GG-WUR-159_GG-WUR-258_GG-WUR-036_GG-WUR-162_GG-WUR-256_GG-WUR-239_GG-WUR-051_GG-WUR-092_GG-WUR-163_GG-WUR-069_GG-WUR-115_GG-WUR-130_GG-WUR-238_GG-WUR-236_GG-WUR-123_GG-WUR-055_GG-WUR-263_GG-WUR-175_GG-WUR-050_GG-WUR-153_G…	2208	63|11|0	missense_variant	MODERATE	CFDP1	ENSGALG00000002853	ENSGALT00000004497	4/7	-	518	476	159	K/R	aAa/aGa	-	deleterious(0.03)	-2.789	PTHR23227	condensed chromosome kinetochore [GO:0000777]; multicellular organism development [GO:0007275]condensed chromosome kinetochore [GO:0000777]; multicellular organism development [GO:0007275]	-	YES
11	7929654	CAGTAAAA	CAGTAAAAGTAAAA	84158.4	236	467	472	0.989407	462	5	WA_WD_W1	2:65,2:73,1:93	GG-WUR-042_GG-WUR-160:GG-WUR-108_GG-WUR-262_GG-WUR-068_GG-WUR-154_GG-WUR-114_GG-WUR-121_GG-WUR-156_GG-WUR-059_GG-WUR-253_GG-WUR-116_GG-WUR-261_GG-WUR-257_GG-WUR-113_GG-WUR-120_GG-WUR-117_GG-WUR-159_GG-WUR-036_GG-WUR-162_GG-WUR-256_GG-WUR-239_GG-WUR-051_GG-WUR-092_GG-WUR-163_GG-WUR-069_GG-WUR-115_GG-WUR-130_GG-WUR-238_GG-WUR-236_GG-WUR-123_GG-WUR-055_GG-WUR-263_GG-WUR-175_GG-WUR-050_GG-WUR-153_GG-…	1639	52|7|0	inframe_insertion	MODERATE	MYLK3	ENSGALG00000004334	ENSGALT00000006871	5/14	-	1341-1347	1341-1347	447-449	TVK/TVKVK	acAGTAAAA/acAGTAAAAGTAAAA	-	-	0.393	-	ATP binding [GO:0005524]; protein serine/threonine kinase activity [GO:0004674]actin cytoskeleton [GO:0015629]; cytoplasm [GO:0005737]; intracellular [GO:0005622]; ATP binding [GO:0005524]; calmodulin-dependent protein kinase activity [GO:0004683]; myosin light chain kinase activity [GO:0004687]; cardiac myofibril assembly [GO:0055003]; cellular response to interleukin-1 [GO:0071347]; intracellul…	no abnormal phenotype observed,mortality/aging,muscle,homeostasis,cardiovascular	YES
11	7974727	C	T	99318.3	223	446	446	1	446	0	WA_WD_W1	0:59,0:72,0:92	.:GG-WUR-108_GG-WUR-262_GG-WUR-068_GG-WUR-154_GG-WUR-042_GG-WUR-114_GG-WUR-121_GG-WUR-156_GG-WUR-059_GG-WUR-116_GG-WUR-257_GG-WUR-113_GG-WUR-120_GG-WUR-159_GG-WUR-036_GG-WUR-162_GG-WUR-239_GG-WUR-051_GG-WUR-092_GG-WUR-163_GG-WUR-069_GG-WUR-115_GG-WUR-130_GG-WUR-238_GG-WUR-236_GG-WUR-123_GG-WUR-055_GG-WUR-263_GG-WUR-175_GG-WUR-050_GG-WUR-153_GG-WUR-118_GG-WUR-111_GG-WUR-134_GG-WUR-119_GG-WUR-122_G…	1149	68|2|0	missense_variant	MODERATE	VPS35	ENSGALG00000004375	ENSGALT00000006976	18/18	-	2396	2396	799	S/F	tCc/tTc	-	deleterious_low_confidence(0)	-0.237	-	cytosol [GO:0005829]; early endosome [GO:0005769]; endosome membrane [GO:0010008]; extracellular exosome [GO:0070062]; late endosome [GO:0005770]; lysosomal membrane [GO:0005765]; mitochondrion [GO:0005739]; mitochondrion-derived vesicle [GO:0099073]; postsynaptic density [GO:0014069]; retromer complex [GO:0030904]; retromer, cargo-selective complex [GO:0030906]; tubular endosome [GO:0097422]; pr…	behavior,cellular,no abnormal phenotype observed,mortality/aging,nervous system,homeostasis,digestive/alimentary	YES
11	10100711	ATATT	AT	88155	233	460	466	0.987124	456	4	WA_WD_W1	4:55,0:75,0:98	GG-WUR-108_GG-WUR-116_GG-WUR-239_GG-WUR-060:GG-WUR-068_GG-WUR-154_GG-WUR-042_GG-WUR-114_GG-WUR-121_GG-WUR-156_GG-WUR-059_GG-WUR-113_GG-WUR-120_GG-WUR-117_GG-WUR-159_GG-WUR-258_GG-WUR-036_GG-WUR-162_GG-WUR-256_GG-WUR-051_GG-WUR-092_GG-WUR-163_GG-WUR-069_GG-WUR-115_GG-WUR-130_GG-WUR-238_GG-WUR-236_GG-WUR-123_GG-WUR-055_GG-WUR-175_GG-WUR-153_GG-WUR-118_GG-WUR-259_GG-WUR-134_GG-WUR-119_GG-WUR-088_GG-…	485	61|6|0	inframe_deletion	MODERATE	CEP89	ENSGALG00000004756	ENSGALT00000007588	19/19	-	2257-2260	2257-2260	753-754	NM/M	AATAtg/Atg	-	-	-4.058	PTHR36170	centriole [GO:0005814]; ciliary transition fiber [GO:0097539]; motile cilium [GO:0031514]; non-motile cilium [GO:0097730]; plasma membrane [GO:0005886]; spindle pole [GO:0000922]; chemical synaptic transmission [GO:0007268]; mitochondrion organization [GO:0007005]; non-motile cilium assembly [GO:1905515]	-	NO
11	19024359	ACATTCATTA	ACATTA	94099.5	243	486	486	1	486	0	WA_WD_W1	0:66,0:76,0:101	.:GG-WUR-108_GG-WUR-262_GG-WUR-068_GG-WUR-154_GG-WUR-042_GG-WUR-114_GG-WUR-121_GG-WUR-156_GG-WUR-059_GG-WUR-253_GG-WUR-116_GG-WUR-261_GG-WUR-257_GG-WUR-113_GG-WUR-120_GG-WUR-117_GG-WUR-159_GG-WUR-036_GG-WUR-162_GG-WUR-256_GG-WUR-239_GG-WUR-051_GG-WUR-092_GG-WUR-163_GG-WUR-069_GG-WUR-115_GG-WUR-130_GG-WUR-238_GG-WUR-236_GG-WUR-123_GG-WUR-055_GG-WUR-263_GG-WUR-175_GG-WUR-050_GG-WUR-153_GG-WUR-118_G…	31	57|6|0	splice_donor_variant&intron_variant	HIGH	FANCA	ENSGALG00000000516	ENSGALT00000000705	-	40/42	-	-	-	-	-	-	-	NA	-	Fanconi anaemia nuclear complex [GO:0043240]; female gonad development [GO:0008585]; male gonad development [GO:0008584]; male meiosis [GO:0007140]; regulation of CD40 signaling pathway [GO:2000348]; regulation of cell proliferation [GO:0042127]; regulation of inflammatory response [GO:0050727]; regulation of regulatory T cell differentiation [GO:0045589]; regulation of sequence-specific DNA bind…	embryo,skeleton,reproductive,craniofacial,endocrine/exocrine,vision/eye,hematopoietic,cellular,mortality/aging,growth/size/body,homeostasis,cardiovascular	NO
12	723964	GTGGGATGCCT	GTGGGATGCCTGGGATGCCT	63985.8	228	444	456	0.973684	432	12	WA_WD_W1	2:61,5:65,5:90	GG-WUR-262_GG-WUR-111:GG-WUR-108_GG-WUR-068_GG-WUR-154_GG-WUR-042_GG-WUR-114_GG-WUR-121_GG-WUR-156_GG-WUR-059_GG-WUR-253_GG-WUR-116_GG-WUR-261_GG-WUR-113_GG-WUR-120_GG-WUR-117_GG-WUR-159_GG-WUR-036_GG-WUR-162_GG-WUR-239_GG-WUR-051_GG-WUR-092_GG-WUR-163_GG-WUR-069_GG-WUR-115_GG-WUR-130_GG-WUR-238_GG-WUR-236_GG-WUR-123_GG-WUR-055_GG-WUR-263_GG-WUR-175_GG-WUR-050_GG-WUR-153_GG-WUR-118_GG-WUR-252_GG-…	318	55|28|0	inframe_insertion	MODERATE	PBRM1	ENSGALG00000037455	ENSGALT00000053460	27/30	-	4491-4500	4416-4425	1472-1475	PGIP/PGIPGIP	ccAGGCATCCCA/ccAGGCATCCCAGGCATCCCA	-	-	9.102	Low_complexity_(Seg):seg&PTHR16062:SF11&PTHR16062	nucleus [GO:0005634]; chromatin binding [GO:0003682]; DNA binding [GO:0003677]nucleus [GO:0005634]; chromatin binding [GO:0003682]; DNA binding [GO:0003677]nucleus [GO:0005634]; chromatin binding [GO:0003682]; DNA binding [GO:0003677]nucleus [GO:0005634]; chromatin binding [GO:0003682]; DNA binding [GO:0003677]	embryo,respiratory,liver/biliary,immune,mortality/aging,hematopoietic,cardiovascular	NO
12	1781492	G	T	128114	233	466	466	1	466	0	WA_WD_W1	0:62,0:77,0:94	.:GG-WUR-108_GG-WUR-068_GG-WUR-154_GG-WUR-042_GG-WUR-114_GG-WUR-121_GG-WUR-156_GG-WUR-059_GG-WUR-116_GG-WUR-257_GG-WUR-113_GG-WUR-120_GG-WUR-117_GG-WUR-159_GG-WUR-258_GG-WUR-036_GG-WUR-162_GG-WUR-051_GG-WUR-092_GG-WUR-163_GG-WUR-069_GG-WUR-115_GG-WUR-130_GG-WUR-236_GG-WUR-123_GG-WUR-055_GG-WUR-175_GG-WUR-050_GG-WUR-153_GG-WUR-118_GG-WUR-259_GG-WUR-111_GG-WUR-254_GG-WUR-134_GG-WUR-119_GG-WUR-122_G…	933	62|2|0	missense_variant	MODERATE	HEMK1	ENSGALG00000002253	ENSGALT00000003536	2/12	-	570	39	13	W/C	tgG/tgT	-	deleterious_low_confidence(0.01)	1	-	nucleic acid binding [GO:0003676]; protein methyltransferase activity [GO:0008276]mitochondrion [GO:0005739]; nucleic acid binding [GO:0003676]; protein methyltransferase activity [GO:0008276]; S-adenosylmethionine-dependent methyltransferase activity [GO:0008757]	-	YES
12	2420666	TGGGGGA	TGGGGA	118087	224	448	448	1	448	0	WA_WD_W1	0:57,0:74,0:93	.:GG-WUR-108_GG-WUR-068_GG-WUR-154_GG-WUR-042_GG-WUR-114_GG-WUR-121_GG-WUR-156_GG-WUR-059_GG-WUR-116_GG-WUR-113_GG-WUR-120_GG-WUR-117_GG-WUR-159_GG-WUR-258_GG-WUR-036_GG-WUR-162_GG-WUR-239_GG-WUR-051_GG-WUR-092_GG-WUR-163_GG-WUR-069_GG-WUR-115_GG-WUR-130_GG-WUR-123_GG-WUR-055_GG-WUR-175_GG-WUR-050_GG-WUR-153_GG-WUR-118_GG-WUR-111_GG-WUR-134_GG-WUR-119_GG-WUR-122_GG-WUR-088_GG-WUR-147_GG-WUR-090_G…	3282	54|18|0	splice_acceptor_variant&inframe_deletion	HIGH	DAG1	ENSGALG00000037784	ENSGALT00000065253	2-3/4	2/3	809-813	809-813	270-271	VPX/VP	gTCCCCC/gTCCCC	-	-	1	PTHR21559&PTHR21559:SF17&1u2cA02&Superfamily_domains:0044193	dystrophin-associated glycoprotein complex [GO:0016010]; integral component of membrane [GO:0016021]; calcium ion binding [GO:0005509]; cytoskeletal anchoring at plasma membrane [GO:0007016]	embryo,muscle,behavior,growth/size/body,vision/eye,cellular,no abnormal phenotype observed,mortality/aging,nervous system,homeostasis,cardiovascular	NO
12	2932623	GTTTTTTTA	GTTTTTTTTA	84273.4	244	488	488	1	488	0	WA_WD_W1	0:71,0:73,0:100	.:GG-WUR-108_GG-WUR-262_GG-WUR-068_GG-WUR-154_GG-WUR-042_GG-WUR-114_GG-WUR-121_GG-WUR-156_GG-WUR-059_GG-WUR-253_GG-WUR-116_GG-WUR-261_GG-WUR-257_GG-WUR-113_GG-WUR-120_GG-WUR-117_GG-WUR-159_GG-WUR-258_GG-WUR-036_GG-WUR-162_GG-WUR-256_GG-WUR-239_GG-WUR-051_GG-WUR-092_GG-WUR-163_GG-WUR-069_GG-WUR-115_GG-WUR-130_GG-WUR-238_GG-WUR-236_GG-WUR-123_GG-WUR-055_GG-WUR-263_GG-WUR-175_GG-WUR-050_GG-WUR-153_G…	1314	55|20|0	splice_acceptor_variant	HIGH	ALAS1	ENSGALG00000003948	ENSGALT00000036281	-	5/7	-	-	-	-	-	-	-	NA	-	mitochondrial matrix [GO:0005759]; 5-aminolevulinate synthase activity [GO:0003870]; pyridoxal phosphate binding [GO:0030170]; protoporphyrinogen IX biosynthetic process [GO:0006782]mitochondrial matrix [GO:0005759]; 5-aminolevulinate synthase activity [GO:0003870]; pyridoxal phosphate binding [GO:0030170]; protoporphyrinogen IX biosynthetic process [GO:0006782]5-aminolevulinate synthase activity…	embryo,mortality/aging,growth/size/body	NO
12	3455679	C	T	85625.7	229	458	458	1	458	0	WA_WD_W1	0:62,0:71,0:96	.:GG-WUR-108_GG-WUR-262_GG-WUR-068_GG-WUR-154_GG-WUR-042_GG-WUR-114_GG-WUR-121_GG-WUR-156_GG-WUR-059_GG-WUR-116_GG-WUR-113_GG-WUR-120_GG-WUR-159_GG-WUR-036_GG-WUR-162_GG-WUR-239_GG-WUR-051_GG-WUR-092_GG-WUR-163_GG-WUR-069_GG-WUR-115_GG-WUR-130_GG-WUR-238_GG-WUR-236_GG-WUR-123_GG-WUR-055_GG-WUR-263_GG-WUR-175_GG-WUR-050_GG-WUR-153_GG-WUR-118_GG-WUR-259_GG-WUR-252_GG-WUR-111_GG-WUR-254_GG-WUR-134_G…	2041	59|12|0	missense_variant	MODERATE	NOL8	ENSGALG00000004750	ENSGALT00000007571	4/16	-	380	380	127	T/I	aCa/aTa	-	deleterious(0.01)	2.432	-	cytoplasm [GO:0005737]; nucleolus [GO:0005730]; nucleotide binding [GO:0000166]; poly(A) RNA binding [GO:0044822]; DNA replication [GO:0006260]; positive regulation of cell growth [GO:0030307]; rRNA processing [GO:0006364]	mortality/aging,growth/size/body,homeostasis,behavior	YES
12	3457673	T	A	113105	236	472	472	1	472	0	WA_WD_W1	0:64,0:76,0:96	.:GG-WUR-108_GG-WUR-262_GG-WUR-068_GG-WUR-154_GG-WUR-042_GG-WUR-114_GG-WUR-121_GG-WUR-156_GG-WUR-059_GG-WUR-253_GG-WUR-116_GG-WUR-113_GG-WUR-120_GG-WUR-117_GG-WUR-159_GG-WUR-036_GG-WUR-162_GG-WUR-239_GG-WUR-051_GG-WUR-092_GG-WUR-163_GG-WUR-069_GG-WUR-115_GG-WUR-130_GG-WUR-238_GG-WUR-236_GG-WUR-123_GG-WUR-055_GG-WUR-263_GG-WUR-175_GG-WUR-050_GG-WUR-153_GG-WUR-118_GG-WUR-259_GG-WUR-252_GG-WUR-111_G…	1843	59|12|0	missense_variant	MODERATE	NOL8	ENSGALG00000004750	ENSGALT00000007571	6/16	-	1819	1819	607	L/I	Tta/Ata	-	deleterious(0.05)	-1.005	-	cytoplasm [GO:0005737]; nucleolus [GO:0005730]; nucleotide binding [GO:0000166]; poly(A) RNA binding [GO:0044822]; DNA replication [GO:0006260]; positive regulation of cell growth [GO:0030307]; rRNA processing [GO:0006364]	mortality/aging,growth/size/body,homeostasis,behavior	YES
12	3457708	G	C	107265	240	480	480	1	480	0	WA_WD_W1	0:64,0:78,0:98	.:GG-WUR-108_GG-WUR-262_GG-WUR-068_GG-WUR-154_GG-WUR-042_GG-WUR-114_GG-WUR-121_GG-WUR-156_GG-WUR-059_GG-WUR-253_GG-WUR-116_GG-WUR-113_GG-WUR-120_GG-WUR-117_GG-WUR-159_GG-WUR-258_GG-WUR-036_GG-WUR-162_GG-WUR-239_GG-WUR-051_GG-WUR-092_GG-WUR-163_GG-WUR-069_GG-WUR-115_GG-WUR-130_GG-WUR-238_GG-WUR-236_GG-WUR-123_GG-WUR-055_GG-WUR-263_GG-WUR-175_GG-WUR-050_GG-WUR-153_GG-WUR-118_GG-WUR-259_GG-WUR-111_G…	1810	59|12|0	missense_variant	MODERATE	NOL8	ENSGALG00000004750	ENSGALT00000007571	6/16	-	1854	1854	618	E/D	gaG/gaC	-	deleterious(0.02)	-1.606	-	cytoplasm [GO:0005737]; nucleolus [GO:0005730]; nucleotide binding [GO:0000166]; poly(A) RNA binding [GO:0044822]; DNA replication [GO:0006260]; positive regulation of cell growth [GO:0030307]; rRNA processing [GO:0006364]	mortality/aging,growth/size/body,homeostasis,behavior	YES
12	5275800	C	A	104435	225	450	450	1	450	0	WA_WD_W1	0:54,0:76,0:95	.:GG-WUR-108_GG-WUR-068_GG-WUR-154_GG-WUR-042_GG-WUR-114_GG-WUR-121_GG-WUR-156_GG-WUR-059_GG-WUR-116_GG-WUR-113_GG-WUR-120_GG-WUR-159_GG-WUR-036_GG-WUR-162_GG-WUR-256_GG-WUR-239_GG-WUR-051_GG-WUR-092_GG-WUR-163_GG-WUR-069_GG-WUR-130_GG-WUR-238_GG-WUR-123_GG-WUR-055_GG-WUR-175_GG-WUR-050_GG-WUR-153_GG-WUR-118_GG-WUR-111_GG-WUR-134_GG-WUR-119_GG-WUR-088_GG-WUR-147_GG-WUR-096_GG-WUR-136_GG-WUR-240_G…	272	51|23|0	missense_variant	MODERATE	IQSEC1	ENSGALG00000005042	ENSGALT00000008081	8/8	-	2499	2499	833	L/F	ttG/ttT	-	deleterious_low_confidence(0.02)	-0.831	-	ARF guanyl-nucleotide exchange factor activity [GO:0005086]; actin cytoskeleton organization [GO:0030036]; regulation of ARF protein signal transduction [GO:0032012]	nervous system	YES
12	6787476	T	C	86173.1	234	468	468	1	468	0	WA_WD_W1	0:65,0:74,0:95	.:GG-WUR-108_GG-WUR-262_GG-WUR-068_GG-WUR-154_GG-WUR-042_GG-WUR-114_GG-WUR-121_GG-WUR-156_GG-WUR-059_GG-WUR-116_GG-WUR-261_GG-WUR-257_GG-WUR-113_GG-WUR-120_GG-WUR-117_GG-WUR-159_GG-WUR-036_GG-WUR-162_GG-WUR-256_GG-WUR-239_GG-WUR-051_GG-WUR-163_GG-WUR-069_GG-WUR-115_GG-WUR-130_GG-WUR-236_GG-WUR-123_GG-WUR-055_GG-WUR-175_GG-WUR-050_GG-WUR-153_GG-WUR-118_GG-WUR-259_GG-WUR-252_GG-WUR-111_GG-WUR-254_G…	125	0|0|0	splice_acceptor_variant&non_coding_transcript_variant	HIGH	-	ENSGALG00000036337	ENSGALT00000062120	-	1/2	-	-	-	-	-	-	-	NA	-		-	YES
12	11677707	C	T	164994	221	442	442	1	442	0	WA_WD_W1	0:61,0:72,0:88	.:GG-WUR-108_GG-WUR-068_GG-WUR-154_GG-WUR-042_GG-WUR-121_GG-WUR-156_GG-WUR-059_GG-WUR-253_GG-WUR-116_GG-WUR-261_GG-WUR-257_GG-WUR-113_GG-WUR-120_GG-WUR-117_GG-WUR-159_GG-WUR-258_GG-WUR-162_GG-WUR-256_GG-WUR-239_GG-WUR-051_GG-WUR-092_GG-WUR-163_GG-WUR-069_GG-WUR-115_GG-WUR-238_GG-WUR-236_GG-WUR-123_GG-WUR-055_GG-WUR-175_GG-WUR-050_GG-WUR-153_GG-WUR-252_GG-WUR-111_GG-WUR-134_GG-WUR-119_GG-WUR-122_G…	1011	62|2|0	missense_variant	MODERATE	WDR6	ENSGALG00000006936	ENSGALT00000011236	6/6	-	2902	2902	1902-08-25	E/K	Gag/Aag	-	tolerated(0.1)	-2.509	2.130.10.10&PTHR14344&Superfamily_domains:SSF50978	-	-	YES
12	11854259	TGGGGGGT	TGGGGGT	101080	216	432	432	1	432	0	WA_WD_W1	0:56,0:72,0:88	.:GG-WUR-108_GG-WUR-068_GG-WUR-154_GG-WUR-042_GG-WUR-114_GG-WUR-121_GG-WUR-156_GG-WUR-116_GG-WUR-261_GG-WUR-113_GG-WUR-120_GG-WUR-117_GG-WUR-159_GG-WUR-258_GG-WUR-036_GG-WUR-162_GG-WUR-239_GG-WUR-051_GG-WUR-092_GG-WUR-163_GG-WUR-069_GG-WUR-115_GG-WUR-238_GG-WUR-236_GG-WUR-123_GG-WUR-055_GG-WUR-175_GG-WUR-050_GG-WUR-153_GG-WUR-118_GG-WUR-111_GG-WUR-134_GG-WUR-119_GG-WUR-122_GG-WUR-088_GG-WUR-147_G…	1056	58|17|0	frameshift_variant	HIGH	PDHB	ENSGALG00000029576	ENSGALT00000048041	3/9	-	279-285	105-111	35-37	TPP/TPX	acACCCCCC/acACCCCC	-	-	1	3.40.50.970&Pfam_domain:PF02779&PTHR11624&Low_complexity_(Seg):seg&SMART_domains:SM00861&Superfamily_domains:SSF52518	pyruvate dehydrogenase (acetyl-transferring) activity [GO:0004739]; acetyl-CoA biosynthetic process from pyruvate [GO:0006086]catalytic activity [GO:0003824]; metabolic process [GO:0008152]	-	NO
12	19348716	C	T	81455	237	447	474	0.943038	424	23	WA_WD_W1	0:65,1:72,22:75	.:GG-WUR-108_GG-WUR-262_GG-WUR-068_GG-WUR-154_GG-WUR-042_GG-WUR-114_GG-WUR-121_GG-WUR-156_GG-WUR-059_GG-WUR-116_GG-WUR-261_GG-WUR-257_GG-WUR-113_GG-WUR-120_GG-WUR-117_GG-WUR-159_GG-WUR-258_GG-WUR-036_GG-WUR-162_GG-WUR-256_GG-WUR-239_GG-WUR-051_GG-WUR-092_GG-WUR-163_GG-WUR-069_GG-WUR-115_GG-WUR-130_GG-WUR-238_GG-WUR-236_GG-WUR-123_GG-WUR-055_GG-WUR-263_GG-WUR-175_GG-WUR-050_GG-WUR-153_GG-WUR-118_G…	1179	62|2|0	missense_variant	MODERATE	RAD18	ENSGALG00000008368	ENSGALT00000075830	8/10	-	1109	1040	347	R/H	cGt/cAt	-	deleterious_low_confidence(0.01)	2.081	-	DNA binding [GO:0003677]; zinc ion binding [GO:0008270]; DNA repair [GO:0006281]DNA binding [GO:0003677]; zinc ion binding [GO:0008270]; DNA repair [GO:0006281]centrosome [GO:0005813]; nuclear inclusion body [GO:0042405]; nucleoplasm [GO:0005654]; nucleus [GO:0005634]; Rad6-Rad18 complex [GO:0097505]; replication fork [GO:0005657]; site of double-strand break [GO:0035861]; single-stranded DNA-dep…	behavior,reproductive,growth/size/body,endocrine/exocrine,liver/biliary,hematopoietic,cellular,mortality/aging,integument,homeostasis	YES
13	2592930	G	C	133036	240	480	480	1	480	0	WA_WD_W1	0:68,0:78,0:94	.:GG-WUR-108_GG-WUR-068_GG-WUR-154_GG-WUR-042_GG-WUR-114_GG-WUR-121_GG-WUR-156_GG-WUR-059_GG-WUR-253_GG-WUR-116_GG-WUR-261_GG-WUR-257_GG-WUR-113_GG-WUR-120_GG-WUR-117_GG-WUR-159_GG-WUR-258_GG-WUR-036_GG-WUR-162_GG-WUR-256_GG-WUR-239_GG-WUR-051_GG-WUR-092_GG-WUR-163_GG-WUR-069_GG-WUR-115_GG-WUR-130_GG-WUR-238_GG-WUR-236_GG-WUR-123_GG-WUR-055_GG-WUR-175_GG-WUR-050_GG-WUR-153_GG-WUR-118_GG-WUR-259_G…	8722	61|8|0	missense_variant	MODERATE	CTNNA1	ENSGALG00000002447	ENSGALT00000003856	17/18	-	2433	1195	399	L/V	Cta/Gta	-	deleterious_low_confidence(0)	-0.838	Low_complexity_(Seg):seg	adherens junction [GO:0005912]; cytosol [GO:0005829]; actin filament organization [GO:0007015]; epithelial cell-cell adhesion [GO:0090136]actin cytoskeleton [GO:0015629]; adherens junction [GO:0005912]; cytosol [GO:0005829]; structural molecule activity [GO:0005198]; actin filament organization [GO:0007015]; epithelial cell-cell adhesion [GO:0090136]	embryo,limbs/digits/tail,nervous system,skeleton,pigmentation,craniofacial,endocrine/exocrine,liver/biliary,immune,vision/eye,hematopoietic,cellular,mortality/aging,integument,muscle,growth/size/body,homeostasis,cardiovascular	NO
13	3950994	C	T	106778	247	494	494	1	494	0	WA_WD_W1	0:68,0:78,0:101	.:GG-WUR-108_GG-WUR-262_GG-WUR-068_GG-WUR-154_GG-WUR-042_GG-WUR-114_GG-WUR-121_GG-WUR-156_GG-WUR-059_GG-WUR-253_GG-WUR-116_GG-WUR-261_GG-WUR-113_GG-WUR-120_GG-WUR-117_GG-WUR-159_GG-WUR-258_GG-WUR-036_GG-WUR-162_GG-WUR-256_GG-WUR-239_GG-WUR-051_GG-WUR-092_GG-WUR-163_GG-WUR-069_GG-WUR-115_GG-WUR-130_GG-WUR-238_GG-WUR-236_GG-WUR-123_GG-WUR-055_GG-WUR-263_GG-WUR-175_GG-WUR-050_GG-WUR-153_GG-WUR-118_G…	421	53|10|0	missense_variant	MODERATE	FOXI1	ENSGALG00000002105	ENSGALT00000003284	1/2	-	301	301	101	G/S	Ggc/Agc	-	tolerated(0.1)	-3.839	PTHR11829&PTHR11829:SF180	nucleus [GO:0005634]; RNA polymerase II core promoter proximal region sequence-specific DNA binding [GO:0000978]; RNA polymerase II transcription factor activity, sequence-specific DNA binding [GO:0000981]; transcriptional activator activity, RNA polymerase II core promoter proximal region sequence-specific binding [GO:0001077]; inner ear morphogenesis [GO:0042472]	behavior,reproductive,craniofacial,hearing/vestibular/ear,renal/urinary,cellular,mortality/aging,nervous system,homeostasis,skeleton	YES
13	4056605	G	C	98927.4	232	464	464	1	464	0	WA_WD_W1	0:61,0:77,0:94	.:GG-WUR-108_GG-WUR-262_GG-WUR-068_GG-WUR-154_GG-WUR-042_GG-WUR-114_GG-WUR-121_GG-WUR-156_GG-WUR-059_GG-WUR-116_GG-WUR-261_GG-WUR-257_GG-WUR-113_GG-WUR-120_GG-WUR-117_GG-WUR-159_GG-WUR-036_GG-WUR-162_GG-WUR-239_GG-WUR-051_GG-WUR-092_GG-WUR-163_GG-WUR-069_GG-WUR-115_GG-WUR-130_GG-WUR-238_GG-WUR-236_GG-WUR-055_GG-WUR-175_GG-WUR-050_GG-WUR-153_GG-WUR-252_GG-WUR-111_GG-WUR-134_GG-WUR-119_GG-WUR-122_G…	587	53|2|0	splice_acceptor_variant	HIGH	FAM196B	ENSGALG00000027809	ENSGALT00000044150	-	1/2	-	-	-	-	-	-	-	NA	-	-	-	YES
13	7821479	T	C	88370.7	217	434	434	1	434	0	WA_WD_W1	0:56,0:71,0:90	.:GG-WUR-068_GG-WUR-154_GG-WUR-042_GG-WUR-114_GG-WUR-121_GG-WUR-156_GG-WUR-059_GG-WUR-116_GG-WUR-261_GG-WUR-113_GG-WUR-120_GG-WUR-117_GG-WUR-159_GG-WUR-258_GG-WUR-036_GG-WUR-162_GG-WUR-051_GG-WUR-092_GG-WUR-163_GG-WUR-069_GG-WUR-130_GG-WUR-238_GG-WUR-236_GG-WUR-123_GG-WUR-055_GG-WUR-263_GG-WUR-175_GG-WUR-153_GG-WUR-118_GG-WUR-111_GG-WUR-134_GG-WUR-119_GG-WUR-122_GG-WUR-088_GG-WUR-147_GG-WUR-090_G…	337	62|17|0	missense_variant	MODERATE	SLU7	ENSGALG00000034414	ENSGALT00000047574	1/15	-	184	184	62	S/P	Tcg/Ccg	-	deleterious_low_confidence(0.02)	-0.136	-	integral component of membrane [GO:0016021]	immune,hematopoietic,mortality/aging	YES
13	8201069	CGA	CA	94081.8	235	470	470	1	470	0	WA_WD_W1	0:65,0:75,0:95	.:GG-WUR-108_GG-WUR-262_GG-WUR-068_GG-WUR-154_GG-WUR-042_GG-WUR-114_GG-WUR-121_GG-WUR-156_GG-WUR-059_GG-WUR-253_GG-WUR-116_GG-WUR-257_GG-WUR-113_GG-WUR-120_GG-WUR-117_GG-WUR-159_GG-WUR-258_GG-WUR-036_GG-WUR-162_GG-WUR-239_GG-WUR-051_GG-WUR-092_GG-WUR-163_GG-WUR-069_GG-WUR-115_GG-WUR-130_GG-WUR-238_GG-WUR-123_GG-WUR-055_GG-WUR-263_GG-WUR-175_GG-WUR-050_GG-WUR-153_GG-WUR-118_GG-WUR-259_GG-WUR-252_G…	1173	61|6|0	frameshift_variant	HIGH	FBXO38	ENSGALG00000038627	ENSGALT00000054526	19/20	-	3266-3267	3153-3154	1051-1052	AK/AX	gcGAaa/gcAaa	-	-	NA	-	-	-	NO
13	9590471	G	A	128968	249	468	498	0.939759	444	24	WA_WD_W1	0:70,24:51,0:101	.:GG-WUR-108_GG-WUR-262_GG-WUR-068_GG-WUR-154_GG-WUR-042_GG-WUR-114_GG-WUR-121_GG-WUR-156_GG-WUR-059_GG-WUR-253_GG-WUR-116_GG-WUR-261_GG-WUR-257_GG-WUR-113_GG-WUR-120_GG-WUR-117_GG-WUR-159_GG-WUR-258_GG-WUR-036_GG-WUR-162_GG-WUR-256_GG-WUR-239_GG-WUR-051_GG-WUR-092_GG-WUR-163_GG-WUR-069_GG-WUR-115_GG-WUR-130_GG-WUR-238_GG-WUR-236_GG-WUR-123_GG-WUR-055_GG-WUR-263_GG-WUR-175_GG-WUR-050_GG-WUR-153_G…	-38	0|0|0	splice_donor_variant&non_coding_transcript_variant	HIGH	-	ENSGALG00000038821	ENSGALT00000080628	-	1/1	-	-	-	-	-	-	-	NA	-		-	YES
13	10371656	T	G	143644	219	438	438	1	438	0	WA_WD_W1	0:56,0:74,0:89	.:GG-WUR-108_GG-WUR-068_GG-WUR-154_GG-WUR-042_GG-WUR-114_GG-WUR-121_GG-WUR-156_GG-WUR-059_GG-WUR-116_GG-WUR-113_GG-WUR-120_GG-WUR-117_GG-WUR-159_GG-WUR-036_GG-WUR-162_GG-WUR-239_GG-WUR-051_GG-WUR-163_GG-WUR-069_GG-WUR-115_GG-WUR-130_GG-WUR-236_GG-WUR-123_GG-WUR-055_GG-WUR-175_GG-WUR-050_GG-WUR-153_GG-WUR-118_GG-WUR-111_GG-WUR-134_GG-WUR-119_GG-WUR-122_GG-WUR-088_GG-WUR-147_GG-WUR-090_GG-WUR-096_G…	751	58|0|0	missense_variant	MODERATE	CDHR2	ENSGALG00000003285	ENSGALT00000005196	18/31	-	2234	2234	745	N/T	aAc/aCc	-	deleterious(0.02)	-4.59	2.60.40.60&SMART_domains:SM00112&Superfamily_domains:SSF49313&PROSITE_profiles:PS50268&PTHR24027&PTHR24027:SF312	apical plasma membrane [GO:0016324]; brush border membrane [GO:0031526]; extracellular exosome [GO:0070062]; microvillus membrane [GO:0031528]; spanning component of plasma membrane [GO:0044214]; calcium ion binding [GO:0005509]; cell-cell adhesion mediated by cadherin [GO:0044331]; epithelial cell differentiation [GO:0030855]; homophilic cell adhesion via plasma membrane adhesion molecules [GO:0…	-	YES
13	12975683	G	A	124497	249	498	498	1	498	0	WA_WD_W1	0:71,0:78,0:100	.:GG-WUR-108_GG-WUR-262_GG-WUR-068_GG-WUR-154_GG-WUR-042_GG-WUR-114_GG-WUR-121_GG-WUR-156_GG-WUR-059_GG-WUR-253_GG-WUR-116_GG-WUR-261_GG-WUR-257_GG-WUR-113_GG-WUR-120_GG-WUR-117_GG-WUR-159_GG-WUR-258_GG-WUR-036_GG-WUR-162_GG-WUR-256_GG-WUR-239_GG-WUR-051_GG-WUR-092_GG-WUR-163_GG-WUR-069_GG-WUR-115_GG-WUR-130_GG-WUR-238_GG-WUR-236_GG-WUR-123_GG-WUR-055_GG-WUR-263_GG-WUR-175_GG-WUR-050_GG-WUR-153_G…	687	57|8|0	missense_variant	MODERATE	FAT2	ENSGALG00000004320	ENSGALT00000006879	9/23	-	5326	5305	1769	V/M	Gtg/Atg	-	deleterious(0.04)	1.061	2.60.40.60&PROSITE_profiles:PS50268&PTHR24026&PTHR24026:SF37&Superfamily_domains:SSF49313	cell-cell adherens junction [GO:0005913]; extracellular exosome [GO:0070062]; integral component of membrane [GO:0016021]; plasma membrane [GO:0005886]; calcium ion binding [GO:0005509]; epithelial cell migration [GO:0010631]; homophilic cell adhesion via plasma membrane adhesion molecules [GO:0007156]integral component of membrane [GO:0016021]; plasma membrane [GO:0005886]; calcium ion binding […	no abnormal phenotype observed	YES
13	13203412	T	C	86987.8	243	486	486	1	486	0	WA_WD_W1	0:70,0:77,0:96	.:GG-WUR-108_GG-WUR-262_GG-WUR-068_GG-WUR-154_GG-WUR-042_GG-WUR-114_GG-WUR-121_GG-WUR-156_GG-WUR-059_GG-WUR-253_GG-WUR-116_GG-WUR-261_GG-WUR-257_GG-WUR-113_GG-WUR-120_GG-WUR-117_GG-WUR-159_GG-WUR-258_GG-WUR-036_GG-WUR-162_GG-WUR-256_GG-WUR-239_GG-WUR-051_GG-WUR-092_GG-WUR-163_GG-WUR-069_GG-WUR-115_GG-WUR-130_GG-WUR-238_GG-WUR-236_GG-WUR-123_GG-WUR-055_GG-WUR-263_GG-WUR-175_GG-WUR-050_GG-WUR-153_G…	205	62|5|2	missense_variant	MODERATE	CAMK2A	ENSGALG00000005621	ENSGALT00000079237	10/16	-	857	857	286	L/P	cTg/cCg	-	deleterious_low_confidence(0.03)	-3.173	PTHR24347&PTHR24347:SF226	ATP binding [GO:0005524]; calmodulin-dependent protein kinase activity [GO:0004683]ATP binding [GO:0005524]; calmodulin-dependent protein kinase activity [GO:0004683]cytoplasm [GO:0005737]; mitochondrion [GO:0005739]; neuron projection [GO:0043005]; nucleus [GO:0005634]; postsynaptic density [GO:0014069]; ATP binding [GO:0005524]; calmodulin binding [GO:0005516]; calmodulin-dependent protein kina…	taste/olfaction,cellular,growth/size/body,vision/eye,behavior,no abnormal phenotype observed,mortality/aging,integument,nervous system,homeostasis	YES
14	737402	C	G	106895	240	480	480	1	480	0	WA_WD_W1	0:68,0:75,0:97	.:GG-WUR-108_GG-WUR-262_GG-WUR-068_GG-WUR-154_GG-WUR-042_GG-WUR-114_GG-WUR-121_GG-WUR-156_GG-WUR-059_GG-WUR-253_GG-WUR-116_GG-WUR-261_GG-WUR-257_GG-WUR-113_GG-WUR-120_GG-WUR-117_GG-WUR-159_GG-WUR-036_GG-WUR-162_GG-WUR-256_GG-WUR-239_GG-WUR-051_GG-WUR-092_GG-WUR-163_GG-WUR-069_GG-WUR-115_GG-WUR-130_GG-WUR-238_GG-WUR-236_GG-WUR-123_GG-WUR-055_GG-WUR-263_GG-WUR-175_GG-WUR-050_GG-WUR-153_GG-WUR-118_G…	4250	51|26|0	missense_variant	MODERATE	MKL2	ENSGALG00000003026	ENSGALT00000004784	9/17	-	1068	745	249	P/A	Ccc/Gcc	-	tolerated(0.16)	-2.536	Low_complexity_(Seg):seg&PTHR22793&PTHR22793:SF5	nucleus [GO:0005634]; RNA polymerase II transcription coactivator activity [GO:0001105]; regulation of transcription from RNA polymerase II promoter [GO:0006357]; smooth muscle cell differentiation [GO:0051145]	embryo,respiratory,craniofacial,liver/biliary,muscle,cellular,mortality/aging,nervous system,homeostasis,cardiovascular	YES
14	3386489	C	T	96154.8	239	461	478	0.964435	444	17	WA_WD_W1	0:65,1:76,16:81	.:GG-WUR-108_GG-WUR-262_GG-WUR-068_GG-WUR-154_GG-WUR-042_GG-WUR-114_GG-WUR-121_GG-WUR-156_GG-WUR-059_GG-WUR-253_GG-WUR-116_GG-WUR-261_GG-WUR-257_GG-WUR-113_GG-WUR-120_GG-WUR-117_GG-WUR-159_GG-WUR-258_GG-WUR-036_GG-WUR-162_GG-WUR-256_GG-WUR-239_GG-WUR-051_GG-WUR-092_GG-WUR-163_GG-WUR-069_GG-WUR-115_GG-WUR-130_GG-WUR-238_GG-WUR-236_GG-WUR-123_GG-WUR-055_GG-WUR-263_GG-WUR-175_GG-WUR-050_GG-WUR-153_G…	756	59|10|0	missense_variant	MODERATE	GNA12	ENSGALG00000004368	ENSGALT00000006969	2/3	-	110	110	37	R/H	cGt/cAt	-	deleterious(0)	-3.322	SMART_domains:SM00275	brush border membrane [GO:0031526]; heterotrimeric G-protein complex [GO:0005834]; D5 dopamine receptor binding [GO:0031752]; G-protein beta/gamma-subunit complex binding [GO:0031683]; GTP binding [GO:0005525]; GTPase activity [GO:0003924]; signal transducer activity [GO:0004871]; adenylate cyclase-modulating G-protein coupled receptor signaling pathway [GO:0007188]; Rho protein signal transducti…	-	YES
14	4135282	C	T	132594	222	444	444	1	444	0	WA_WD_W1	0:56,0:76,0:90	.:GG-WUR-108_GG-WUR-068_GG-WUR-154_GG-WUR-042_GG-WUR-114_GG-WUR-121_GG-WUR-156_GG-WUR-059_GG-WUR-116_GG-WUR-113_GG-WUR-120_GG-WUR-117_GG-WUR-159_GG-WUR-036_GG-WUR-162_GG-WUR-239_GG-WUR-051_GG-WUR-092_GG-WUR-163_GG-WUR-069_GG-WUR-115_GG-WUR-130_GG-WUR-123_GG-WUR-055_GG-WUR-175_GG-WUR-050_GG-WUR-153_GG-WUR-118_GG-WUR-111_GG-WUR-134_GG-WUR-119_GG-WUR-122_GG-WUR-088_GG-WUR-147_GG-WUR-090_GG-WUR-096_G…	1300	47|30|0	missense_variant	MODERATE	TNRC18	ENSGALG00000040770	ENSGALT00000047158	3/27	-	605	310	104	A/T	Gcg/Acg	-	deleterious(0.03)	-0.422	-	chromatin binding [GO:0003682]chromatin binding [GO:0003682]	-	YES
14	4406481	T	C	78395.9	230	437	460	0.95	416	21	WA_WD_W1	0:64,0:70,21:74	.:GG-WUR-262_GG-WUR-068_GG-WUR-154_GG-WUR-042_GG-WUR-114_GG-WUR-121_GG-WUR-156_GG-WUR-059_GG-WUR-253_GG-WUR-116_GG-WUR-261_GG-WUR-257_GG-WUR-113_GG-WUR-117_GG-WUR-159_GG-WUR-258_GG-WUR-036_GG-WUR-162_GG-WUR-256_GG-WUR-239_GG-WUR-051_GG-WUR-092_GG-WUR-069_GG-WUR-115_GG-WUR-130_GG-WUR-238_GG-WUR-236_GG-WUR-123_GG-WUR-055_GG-WUR-263_GG-WUR-175_GG-WUR-050_GG-WUR-153_GG-WUR-118_GG-WUR-259_GG-WUR-252_G…	771	62|2|0	missense_variant	MODERATE	-	ENSGALG00000004711	ENSGALT00000007505	1/8	-	970	970	324	T/A	Acc/Gcc	-	deleterious_low_confidence(0.03)	-0.141	PTHR24014:SF6&PTHR24014	mitochondrial matrix [GO:0005759]; tRNA binding [GO:0000049]; tRNA 3'-end processing [GO:0042780]	-	YES
14	4727711	C	T	120859	247	494	494	1	494	0	WA_WD_W1	0:70,0:78,0:99	.:GG-WUR-108_GG-WUR-262_GG-WUR-068_GG-WUR-154_GG-WUR-042_GG-WUR-114_GG-WUR-121_GG-WUR-156_GG-WUR-059_GG-WUR-253_GG-WUR-116_GG-WUR-261_GG-WUR-257_GG-WUR-113_GG-WUR-120_GG-WUR-117_GG-WUR-159_GG-WUR-258_GG-WUR-036_GG-WUR-162_GG-WUR-256_GG-WUR-239_GG-WUR-051_GG-WUR-092_GG-WUR-163_GG-WUR-069_GG-WUR-115_GG-WUR-130_GG-WUR-238_GG-WUR-123_GG-WUR-055_GG-WUR-263_GG-WUR-175_GG-WUR-050_GG-WUR-153_GG-WUR-118_G…	264	16|4|0	missense_variant	MODERATE	MPRIP	ENSGALG00000004798	ENSGALT00000067329	14/15	-	1481	1481	494	P/L	cCt/cTt	-	deleterious_low_confidence(0.01)	1	-	actin cytoskeleton [GO:0015629]; cell-cell adherens junction [GO:0005913]; cytoplasm [GO:0005737]; focal adhesion [GO:0005925]; cell-cell adhesion [GO:0098609]	-	YES
14	4928720	A	G	115216	238	476	476	1	476	0	WA_WD_W1	0:63,0:76,0:99	.:GG-WUR-108_GG-WUR-068_GG-WUR-154_GG-WUR-042_GG-WUR-114_GG-WUR-121_GG-WUR-156_GG-WUR-059_GG-WUR-116_GG-WUR-257_GG-WUR-113_GG-WUR-120_GG-WUR-117_GG-WUR-159_GG-WUR-036_GG-WUR-162_GG-WUR-256_GG-WUR-239_GG-WUR-051_GG-WUR-092_GG-WUR-163_GG-WUR-069_GG-WUR-115_GG-WUR-130_GG-WUR-238_GG-WUR-236_GG-WUR-123_GG-WUR-055_GG-WUR-263_GG-WUR-175_GG-WUR-050_GG-WUR-153_GG-WUR-118_GG-WUR-111_GG-WUR-134_GG-WUR-119_G…	651	56|4|0	missense_variant	MODERATE	RAI1	ENSGALG00000004888	ENSGALT00000007807	2/3	-	1979	1979	660	D/G	gAt/gGt	-	-	-2.794	PTHR14955:SF6&PTHR14955	mitochondrion [GO:0005739]; nucleoplasm [GO:0005654]; nucleus [GO:0005634]; enhancer binding [GO:0035326]; transcription factor activity, sequence-specific DNA binding [GO:0003700]; transcription regulatory region DNA binding [GO:0044212]; circadian regulation of gene expression [GO:0032922]; negative regulation of multicellular organism growth [GO:0040015]; positive regulation of transcription f…	liver/biliary,respiratory,skeleton,reproductive,craniofacial,adipose,endocrine/exocrine,limbs/digits/tail,behavior,mortality/aging,integument,nervous system,growth/size/body,homeostasis	YES
14	5033667	T	A	109000	248	496	496	1	496	0	WA_WD_W1	0:71,0:77,0:100	.:GG-WUR-108_GG-WUR-262_GG-WUR-068_GG-WUR-154_GG-WUR-042_GG-WUR-114_GG-WUR-121_GG-WUR-156_GG-WUR-059_GG-WUR-253_GG-WUR-116_GG-WUR-261_GG-WUR-257_GG-WUR-113_GG-WUR-120_GG-WUR-117_GG-WUR-159_GG-WUR-258_GG-WUR-036_GG-WUR-162_GG-WUR-256_GG-WUR-239_GG-WUR-051_GG-WUR-092_GG-WUR-163_GG-WUR-069_GG-WUR-115_GG-WUR-130_GG-WUR-238_GG-WUR-236_GG-WUR-123_GG-WUR-055_GG-WUR-263_GG-WUR-175_GG-WUR-050_GG-WUR-153_G…	327	62|2|0	missense_variant	MODERATE	DRG2	ENSGALG00000004953	ENSGALT00000063481	5/13	-	374	374	1900-05-04	V/D	gTt/gAt	-	deleterious(0)	0.016	Low_complexity_(Seg):seg&PROSITE_profiles:PS51710&PTHR11702&PTHR11702:SF26&3.40.50.300&Pfam_domain:PF01926&Superfamily_domains:SSF52540	GTP binding [GO:0005525]GTP binding [GO:0005525]	limbs/digits/tail,growth/size/body,homeostasis,behavior,skeleton	YES
14	5107264	G	A	132242	236	472	472	1	472	0	WA_WD_W1	0:64,0:76,0:96	.:GG-WUR-108_GG-WUR-262_GG-WUR-068_GG-WUR-154_GG-WUR-042_GG-WUR-114_GG-WUR-121_GG-WUR-156_GG-WUR-059_GG-WUR-116_GG-WUR-261_GG-WUR-113_GG-WUR-120_GG-WUR-117_GG-WUR-159_GG-WUR-258_GG-WUR-036_GG-WUR-256_GG-WUR-051_GG-WUR-092_GG-WUR-163_GG-WUR-069_GG-WUR-115_GG-WUR-130_GG-WUR-238_GG-WUR-236_GG-WUR-123_GG-WUR-055_GG-WUR-175_GG-WUR-050_GG-WUR-153_GG-WUR-118_GG-WUR-259_GG-WUR-111_GG-WUR-134_GG-WUR-119_G…	1195	52|7|0	splice_donor_variant	HIGH	MIEF2	ENSGALG00000005005	ENSGALT00000008014	-	4/4	-	-	-	-	-	-	-	NA	-	mitochondrial outer membrane [GO:0005741]; mitochondrion organization [GO:0007005]; positive regulation of mitochondrial fission [GO:0090141]; positive regulation of protein homooligomerization [GO:0032464]; positive regulation of protein targeting to membrane [GO:0090314]	-	YES
14	5619164	C	A	111840	248	496	496	1	496	0	WA_WD_W1	0:71,0:78,0:99	.:GG-WUR-108_GG-WUR-262_GG-WUR-068_GG-WUR-154_GG-WUR-042_GG-WUR-114_GG-WUR-121_GG-WUR-156_GG-WUR-059_GG-WUR-253_GG-WUR-116_GG-WUR-261_GG-WUR-257_GG-WUR-113_GG-WUR-120_GG-WUR-117_GG-WUR-159_GG-WUR-258_GG-WUR-036_GG-WUR-162_GG-WUR-256_GG-WUR-239_GG-WUR-051_GG-WUR-092_GG-WUR-163_GG-WUR-069_GG-WUR-115_GG-WUR-130_GG-WUR-238_GG-WUR-236_GG-WUR-123_GG-WUR-055_GG-WUR-263_GG-WUR-175_GG-WUR-050_GG-WUR-153_G…	363	31|7|14	missense_variant	MODERATE	-	ENSGALG00000005253	ENSGALT00000008437	2/2	-	703	703	235	L/I	Ctc/Atc	-	deleterious(0.01)	-1.683	PROSITE_profiles:PS50871&PTHR22923:SF56&PTHR22923&Pfam_domain:PF00386&2.60.120.40&SMART_domains:SM00110&Superfamily_domains:SSF49842&Prints_domain:PR00007	collagen trimer [GO:0005581]; extracellular region [GO:0005576]	-	NO
14	6923471	C	A	115018	248	481	496	0.969758	468	13	WA_WD_W1	0:70,8:69,5:95	.:GG-WUR-108_GG-WUR-262_GG-WUR-068_GG-WUR-154_GG-WUR-042_GG-WUR-114_GG-WUR-121_GG-WUR-156_GG-WUR-059_GG-WUR-253_GG-WUR-116_GG-WUR-261_GG-WUR-257_GG-WUR-113_GG-WUR-120_GG-WUR-117_GG-WUR-159_GG-WUR-258_GG-WUR-036_GG-WUR-162_GG-WUR-256_GG-WUR-239_GG-WUR-051_GG-WUR-092_GG-WUR-163_GG-WUR-069_GG-WUR-115_GG-WUR-130_GG-WUR-238_GG-WUR-123_GG-WUR-055_GG-WUR-263_GG-WUR-175_GG-WUR-050_GG-WUR-153_GG-WUR-118_G…	418	56|5|0	missense_variant	MODERATE	PALB2	ENSGALG00000006078	ENSGALT00000009810	5/11	-	3253	2650	884	V/L	Gtg/Ttg	-	deleterious(0.01)	1	PTHR14662:SF2&PTHR14662&2.130.10.10&Pfam_domain:PF16756&Superfamily_domains:SSF50978	-	embryo,growth/size/body,limbs/digits/tail,cellular,mortality/aging,nervous system,cardiovascular	YES
14	6963983	A	G	138962	233	466	466	1	466	0	WA_WD_W1	0:62,0:77,0:94	.:GG-WUR-108_GG-WUR-262_GG-WUR-068_GG-WUR-154_GG-WUR-042_GG-WUR-114_GG-WUR-121_GG-WUR-156_GG-WUR-059_GG-WUR-116_GG-WUR-113_GG-WUR-120_GG-WUR-117_GG-WUR-159_GG-WUR-258_GG-WUR-036_GG-WUR-162_GG-WUR-256_GG-WUR-051_GG-WUR-092_GG-WUR-163_GG-WUR-069_GG-WUR-115_GG-WUR-130_GG-WUR-236_GG-WUR-123_GG-WUR-055_GG-WUR-175_GG-WUR-050_GG-WUR-153_GG-WUR-118_GG-WUR-252_GG-WUR-111_GG-WUR-134_GG-WUR-119_GG-WUR-122_G…	265	66|2|0	missense_variant	MODERATE	EARS2	ENSGALG00000006122	ENSGALT00000009880	4/9	-	882	824	275	H/R	cAc/cGc	-	tolerated(0.27)	-3.949	MF_00022_B&PTHR11451:SF26&PTHR11451&TIGRFAM_domain:TIGR00464&1.10.1160.10&Pfam_domain:PF00749&Superfamily_domains:SSF52374	mitochondrion [GO:0005739]; ATP binding [GO:0005524]; glutamate-tRNA ligase activity [GO:0004818]; glutamate-tRNA(Gln) ligase activity [GO:0050561]; tRNA binding [GO:0000049]; zinc ion binding [GO:0008270]; glutamyl-tRNA aminoacylation [GO:0006424]; tRNA aminoacylation for mitochondrial protein translation [GO:0070127]	-	YES
14	6978108	G	C	168671	213	426	426	1	426	0	WA_WD_W1	0:53,0:74,0:86	.:GG-WUR-108_GG-WUR-068_GG-WUR-154_GG-WUR-042_GG-WUR-114_GG-WUR-121_GG-WUR-156_GG-WUR-059_GG-WUR-116_GG-WUR-113_GG-WUR-120_GG-WUR-117_GG-WUR-036_GG-WUR-162_GG-WUR-051_GG-WUR-092_GG-WUR-163_GG-WUR-069_GG-WUR-115_GG-WUR-130_GG-WUR-236_GG-WUR-123_GG-WUR-055_GG-WUR-175_GG-WUR-050_GG-WUR-153_GG-WUR-111_GG-WUR-134_GG-WUR-119_GG-WUR-122_GG-WUR-088_GG-WUR-147_GG-WUR-090_GG-WUR-096_GG-WUR-136_GG-WUR-160_G…	513	57|8|2	missense_variant&splice_region_variant	MODERATE	GGA2	ENSGALG00000006140	ENSGALT00000009913	19/19	-	2725	1768	590	D/H	Gat/Cat	-	deleterious(0.05)	1	PROSITE_profiles:PS50180&PTHR13856:SF74&PTHR13856&Pfam_domain:PF02883&2.60.40.1230&SMART_domains:SM00809&Superfamily_domains:SSF49348	clathrin adaptor complex [GO:0030131]; clathrin-coated vesicle [GO:0030136]; trans-Golgi network [GO:0005802]; intracellular protein transport [GO:0006886]; vesicle-mediated transport [GO:0016192]	mortality/aging,growth/size/body,homeostasis	YES
14	7725517	G	A	62794.5	217	434	434	1	434	0	WA_WD_W1	0:64,0:65,0:88	.:GG-WUR-108_GG-WUR-068_GG-WUR-154_GG-WUR-042_GG-WUR-114_GG-WUR-121_GG-WUR-156_GG-WUR-059_GG-WUR-253_GG-WUR-261_GG-WUR-120_GG-WUR-117_GG-WUR-159_GG-WUR-258_GG-WUR-036_GG-WUR-162_GG-WUR-256_GG-WUR-239_GG-WUR-051_GG-WUR-092_GG-WUR-163_GG-WUR-069_GG-WUR-115_GG-WUR-130_GG-WUR-238_GG-WUR-236_GG-WUR-123_GG-WUR-055_GG-WUR-175_GG-WUR-050_GG-WUR-153_GG-WUR-118_GG-WUR-259_GG-WUR-111_GG-WUR-254_GG-WUR-134_G…	466	50|4|11	stop_gained	HIGH	ABCC1	ENSGALG00000006646	ENSGALT00000074491	30/31	-	4245	4245	1415	W/*	tgG/tgA	-	-	NA	Low_complexity_(Seg):seg&TIGRFAM_domain:TIGR00957&Pfam_domain:PF00005&3.40.50.300&SMART_domains:SM00382&Superfamily_domains:SSF52540&PROSITE_profiles:PS50893	integral component of membrane [GO:0016021]; ATP binding [GO:0005524]; ATPase activity, coupled to transmembrane movement of substances [GO:0042626]integral component of membrane [GO:0016021]; ATP binding [GO:0005524]; ATPase activity, coupled to transmembrane movement of substances [GO:0042626]integral component of membrane [GO:0016021]; ATP binding [GO:0005524]; ATPase activity, coupled to tran…	immune,hematopoietic,homeostasis,mortality/aging	YES
14	8551689	G	A	119054	243	486	486	1	486	0	WA_WD_W1	0:67,0:78,0:98	.:GG-WUR-108_GG-WUR-068_GG-WUR-154_GG-WUR-042_GG-WUR-114_GG-WUR-121_GG-WUR-156_GG-WUR-059_GG-WUR-253_GG-WUR-116_GG-WUR-257_GG-WUR-113_GG-WUR-120_GG-WUR-117_GG-WUR-159_GG-WUR-036_GG-WUR-162_GG-WUR-256_GG-WUR-239_GG-WUR-051_GG-WUR-092_GG-WUR-163_GG-WUR-069_GG-WUR-115_GG-WUR-130_GG-WUR-238_GG-WUR-236_GG-WUR-123_GG-WUR-055_GG-WUR-263_GG-WUR-175_GG-WUR-050_GG-WUR-153_GG-WUR-118_GG-WUR-252_GG-WUR-111_G…	3385	63|2|2	missense_variant	MODERATE	TMC5	ENSGALG00000006911	ENSGALT00000011200	6/23	-	704	500	167	R/H	cGt/cAt	-	deleterious(0.01)	1	PTHR23302:SF5&PTHR23302	integral component of membrane [GO:0016021]	-	YES
14	9146922	G	A	102767	243	451	486	0.927984	422	29	WA_WD_W1	0:68,29:45,0:98	.:GG-WUR-108_GG-WUR-262_GG-WUR-068_GG-WUR-154_GG-WUR-042_GG-WUR-114_GG-WUR-121_GG-WUR-156_GG-WUR-059_GG-WUR-253_GG-WUR-116_GG-WUR-261_GG-WUR-257_GG-WUR-113_GG-WUR-120_GG-WUR-117_GG-WUR-159_GG-WUR-258_GG-WUR-036_GG-WUR-162_GG-WUR-256_GG-WUR-239_GG-WUR-051_GG-WUR-092_GG-WUR-163_GG-WUR-069_GG-WUR-115_GG-WUR-130_GG-WUR-238_GG-WUR-236_GG-WUR-055_GG-WUR-175_GG-WUR-050_GG-WUR-153_GG-WUR-118_GG-WUR-259_G…	-73	53|7|0	splice_acceptor_variant	HIGH	TVP23A	ENSGALG00000007216	ENSGALT00000011682	-	2/10	-	-	-	-	-	-	-	NA	-	integral component of membrane [GO:0016021]integral component of membrane [GO:0016021]integral component of Golgi membrane [GO:0030173]; protein secretion [GO:0009306]; vesicle-mediated transport [GO:0016192]	-	YES
14	10171659	C	T	105798	247	485	494	0.981781	476	9	WA_WD_W1	0:69,9:68,0:101	.:GG-WUR-108_GG-WUR-262_GG-WUR-068_GG-WUR-154_GG-WUR-042_GG-WUR-114_GG-WUR-121_GG-WUR-156_GG-WUR-059_GG-WUR-253_GG-WUR-116_GG-WUR-261_GG-WUR-257_GG-WUR-113_GG-WUR-120_GG-WUR-117_GG-WUR-159_GG-WUR-258_GG-WUR-036_GG-WUR-256_GG-WUR-239_GG-WUR-051_GG-WUR-092_GG-WUR-163_GG-WUR-069_GG-WUR-115_GG-WUR-130_GG-WUR-238_GG-WUR-236_GG-WUR-123_GG-WUR-055_GG-WUR-263_GG-WUR-175_GG-WUR-050_GG-WUR-153_GG-WUR-118_G…	109	58|2|0	splice_acceptor_variant	HIGH	METTL22	ENSGALG00000033603	ENSGALT00000048292	-	1/11	-	-	-	-	-	-	-	NA	-	-	-	NO
14	11970081	T	C	116338	238	476	476	1	476	0	WA_WD_W1	0:66,0:76,0:96	.:GG-WUR-108_GG-WUR-262_GG-WUR-068_GG-WUR-154_GG-WUR-042_GG-WUR-114_GG-WUR-121_GG-WUR-156_GG-WUR-059_GG-WUR-253_GG-WUR-116_GG-WUR-261_GG-WUR-257_GG-WUR-113_GG-WUR-120_GG-WUR-117_GG-WUR-159_GG-WUR-036_GG-WUR-162_GG-WUR-256_GG-WUR-239_GG-WUR-051_GG-WUR-092_GG-WUR-163_GG-WUR-069_GG-WUR-115_GG-WUR-130_GG-WUR-238_GG-WUR-123_GG-WUR-055_GG-WUR-263_GG-WUR-175_GG-WUR-050_GG-WUR-153_GG-WUR-118_GG-WUR-252_G…	1431	59|11|0	splice_acceptor_variant	HIGH	KIAA0556	ENSGALG00000043363	ENSGALT00000070416	-	16/28	-	-	-	-	-	-	-	NA	-	-	-	YES
14	12317826	A	T	119457	236	454	472	0.961864	438	16	WA_WD_W1	10:50,0:78,6:91	GG-WUR-092_GG-WUR-069_GG-WUR-153_GG-WUR-090_GG-WUR-135_GG-WUR-251_GG-WUR-053_GG-WUR-056_GG-WUR-052_GG-WUR-143:GG-WUR-068_GG-WUR-154_GG-WUR-042_GG-WUR-114_GG-WUR-121_GG-WUR-156_GG-WUR-059_GG-WUR-116_GG-WUR-261_GG-WUR-113_GG-WUR-120_GG-WUR-117_GG-WUR-159_GG-WUR-036_GG-WUR-162_GG-WUR-239_GG-WUR-051_GG-WUR-163_GG-WUR-115_GG-WUR-130_GG-WUR-236_GG-WUR-123_GG-WUR-055_GG-WUR-263_GG-WUR-175_GG-WUR-050_GG-…	489	59|7|0	missense_variant	MODERATE	LUC7L	ENSGALG00000037983	ENSGALT00000079768	7/7	-	864	864	288	S/R	agT/agA	-	deleterious_low_confidence(0.02)	0.102	-	U1 snRNP [GO:0005685]; mRNA binding [GO:0003729]; mRNA splice site selection [GO:0006376]	no abnormal phenotype observed	YES
14	14698446	A	G	123278	236	472	472	1	472	0	WA_WD_W1	0:62,0:77,0:97	.:GG-WUR-108_GG-WUR-262_GG-WUR-068_GG-WUR-154_GG-WUR-042_GG-WUR-114_GG-WUR-121_GG-WUR-156_GG-WUR-059_GG-WUR-116_GG-WUR-261_GG-WUR-113_GG-WUR-120_GG-WUR-117_GG-WUR-159_GG-WUR-036_GG-WUR-162_GG-WUR-239_GG-WUR-051_GG-WUR-092_GG-WUR-163_GG-WUR-069_GG-WUR-115_GG-WUR-130_GG-WUR-238_GG-WUR-236_GG-WUR-123_GG-WUR-055_GG-WUR-175_GG-WUR-050_GG-WUR-153_GG-WUR-118_GG-WUR-259_GG-WUR-111_GG-WUR-254_GG-WUR-134_G…	171	50|2|0	splice_acceptor_variant	HIGH	IQCK	ENSGALG00000028197	ENSGALT00000045802	-	3/8	-	-	-	-	-	-	-	7.754	-	-	-	YES
14	14839116	T	C	127700	250	500	500	1	500	0	WA_WD_W1	0:71,0:78,0:101	.:GG-WUR-108_GG-WUR-262_GG-WUR-068_GG-WUR-154_GG-WUR-042_GG-WUR-114_GG-WUR-121_GG-WUR-156_GG-WUR-059_GG-WUR-253_GG-WUR-116_GG-WUR-261_GG-WUR-257_GG-WUR-113_GG-WUR-120_GG-WUR-117_GG-WUR-159_GG-WUR-258_GG-WUR-036_GG-WUR-162_GG-WUR-256_GG-WUR-239_GG-WUR-051_GG-WUR-092_GG-WUR-163_GG-WUR-069_GG-WUR-115_GG-WUR-130_GG-WUR-238_GG-WUR-236_GG-WUR-123_GG-WUR-055_GG-WUR-263_GG-WUR-175_GG-WUR-050_GG-WUR-153_G…	820	61|4|0	missense_variant	MODERATE	-	ENSGALG00000026038	ENSGALT00000045747	2/2	-	1823	1268	423	H/R	cAt/cGt	-	tolerated(0.07)	-3.012	Pfam_domain:PF06839&PTHR23044&PTHR23044:SF37	nucleic acid binding [GO:0003676]; zinc ion binding [GO:0008270]; exonucleolytic trimming to generate mature 3'-end of 5.8S rRNA from tricistronic rRNA transcript (SSU-rRNA, 5.8S rRNA, LSU-rRNA) [GO:0000467]	-	YES
15	3775315	T	G	95431.3	247	446	494	0.902834	410	36	WA_WD_W1	0:69,36:36,0:100	.:GG-WUR-108_GG-WUR-262_GG-WUR-068_GG-WUR-154_GG-WUR-042_GG-WUR-114_GG-WUR-121_GG-WUR-156_GG-WUR-059_GG-WUR-253_GG-WUR-116_GG-WUR-261_GG-WUR-257_GG-WUR-113_GG-WUR-120_GG-WUR-117_GG-WUR-159_GG-WUR-258_GG-WUR-036_GG-WUR-256_GG-WUR-239_GG-WUR-051_GG-WUR-092_GG-WUR-163_GG-WUR-069_GG-WUR-115_GG-WUR-130_GG-WUR-238_GG-WUR-123_GG-WUR-055_GG-WUR-263_GG-WUR-175_GG-WUR-050_GG-WUR-153_GG-WUR-118_GG-WUR-259_G…	350	61|2|0	missense_variant	MODERATE	GLT1D1	ENSGALG00000002679	ENSGALT00000034720	3/13	-	553	154	52	N/H	Aat/Cat	-	deleterious(0.04)	0.37	PTHR12526&PTHR12526:SF389	cytoplasm [GO:0005737]	-	YES
15	4708306	A	G	97336.7	244	488	488	1	488	0	WA_WD_W1	0:68,0:77,0:99	.:GG-WUR-108_GG-WUR-262_GG-WUR-068_GG-WUR-154_GG-WUR-042_GG-WUR-114_GG-WUR-121_GG-WUR-156_GG-WUR-059_GG-WUR-253_GG-WUR-116_GG-WUR-261_GG-WUR-257_GG-WUR-113_GG-WUR-120_GG-WUR-117_GG-WUR-159_GG-WUR-258_GG-WUR-036_GG-WUR-162_GG-WUR-256_GG-WUR-239_GG-WUR-051_GG-WUR-092_GG-WUR-163_GG-WUR-069_GG-WUR-115_GG-WUR-130_GG-WUR-238_GG-WUR-236_GG-WUR-123_GG-WUR-055_GG-WUR-175_GG-WUR-050_GG-WUR-153_GG-WUR-118_G…	91	53|18|2	splice_acceptor_variant	HIGH	NCOR2	ENSGALG00000003120	ENSGALT00000066195	-	12/13	-	-	-	-	-	-	-	NA	-	histone deacetylase complex [GO:0000118]; DNA binding [GO:0003677]; ligand-dependent nuclear receptor binding [GO:0016922]; transcription corepressor activity [GO:0003714]; transcription factor binding [GO:0008134]; negative regulation of transcription from RNA polymerase II promoter [GO:0000122]	behavior,growth/size/body,adipose,liver/biliary,immune,hematopoietic,cellular,no abnormal phenotype observed,mortality/aging,nervous system,skeleton,homeostasis,cardiovascular	YES
15	4951516	T	C	108733	238	476	476	1	476	0	WA_WD_W1	0:63,0:77,0:98	.:GG-WUR-108_GG-WUR-068_GG-WUR-154_GG-WUR-042_GG-WUR-114_GG-WUR-121_GG-WUR-156_GG-WUR-059_GG-WUR-116_GG-WUR-261_GG-WUR-113_GG-WUR-120_GG-WUR-117_GG-WUR-159_GG-WUR-036_GG-WUR-162_GG-WUR-256_GG-WUR-239_GG-WUR-051_GG-WUR-092_GG-WUR-163_GG-WUR-069_GG-WUR-115_GG-WUR-130_GG-WUR-238_GG-WUR-236_GG-WUR-123_GG-WUR-055_GG-WUR-263_GG-WUR-175_GG-WUR-050_GG-WUR-153_GG-WUR-118_GG-WUR-252_GG-WUR-111_GG-WUR-134_G…	211	56|6|0	missense_variant	MODERATE	DNAH10	ENSGALG00000043806	ENSGALT00000073055	1/74	-	17	17	6	Y/C	tAt/tGt	-	deleterious_low_confidence(0.02)	-2.707	-	dynein complex [GO:0030286]; ATP binding [GO:0005524]; ATPase activity [GO:0016887]; microtubule motor activity [GO:0003777]; microtubule-based movement [GO:0007018]	-	YES
15	5119358	G	A	96285.6	234	468	468	1	468	0	WA_WD_W1	0:63,0:74,0:97	.:GG-WUR-108_GG-WUR-068_GG-WUR-154_GG-WUR-042_GG-WUR-114_GG-WUR-121_GG-WUR-156_GG-WUR-059_GG-WUR-253_GG-WUR-116_GG-WUR-261_GG-WUR-257_GG-WUR-113_GG-WUR-120_GG-WUR-117_GG-WUR-159_GG-WUR-258_GG-WUR-036_GG-WUR-162_GG-WUR-239_GG-WUR-051_GG-WUR-092_GG-WUR-069_GG-WUR-115_GG-WUR-130_GG-WUR-238_GG-WUR-236_GG-WUR-123_GG-WUR-055_GG-WUR-175_GG-WUR-050_GG-WUR-153_GG-WUR-118_GG-WUR-259_GG-WUR-252_GG-WUR-111_G…	200	58|9|0	splice_donor_variant	HIGH	MPHOSPH9	ENSGALG00000003419	ENSGALT00000046399	-	18/23	-	-	-	-	-	-	-	NA	-	centriole [GO:0005814]; Golgi apparatus [GO:0005794]; plasma membrane [GO:0005886]	-	YES
15	5461762	CTTTTTTTTTTC	CTTTTTTTTTC	97362.8	241	482	482	1	482	0	WA_WD_W1	0:68,0:77,0:96	.:GG-WUR-108_GG-WUR-262_GG-WUR-068_GG-WUR-154_GG-WUR-042_GG-WUR-114_GG-WUR-121_GG-WUR-156_GG-WUR-059_GG-WUR-253_GG-WUR-116_GG-WUR-261_GG-WUR-113_GG-WUR-120_GG-WUR-117_GG-WUR-159_GG-WUR-258_GG-WUR-036_GG-WUR-162_GG-WUR-256_GG-WUR-239_GG-WUR-051_GG-WUR-092_GG-WUR-163_GG-WUR-069_GG-WUR-115_GG-WUR-130_GG-WUR-238_GG-WUR-236_GG-WUR-123_GG-WUR-055_GG-WUR-263_GG-WUR-175_GG-WUR-050_GG-WUR-153_GG-WUR-118_G…	815	52|8|2	splice_acceptor_variant&intron_variant	HIGH	P2RX7	ENSGALG00000003863	ENSGALT00000006151	-	4/13	-	-	-	-	-	-	-	NA	-	cell-cell junction [GO:0005911]; external side of plasma membrane [GO:0009897]; integral component of nuclear inner membrane [GO:0005639]; integral component of plasma membrane [GO:0005887]; neuromuscular junction [GO:0031594]; neuronal cell body [GO:0043025]; presynapse [GO:0098793]; ATP binding [GO:0005524]; extracellular ATP-gated cation channel activity [GO:0004931]; lipopolysaccharide bindin…	skeleton,growth/size/body,limbs/digits/tail,immune,homeostasis,cellular,behavior,integument,hematopoietic	NO
15	6022839	T	C	98403.4	244	470	488	0.963115	452	18	WA_WD_W1	0:69,2:75,16:82	.:GG-WUR-108_GG-WUR-262_GG-WUR-068_GG-WUR-154_GG-WUR-042_GG-WUR-114_GG-WUR-121_GG-WUR-156_GG-WUR-059_GG-WUR-253_GG-WUR-116_GG-WUR-261_GG-WUR-257_GG-WUR-113_GG-WUR-120_GG-WUR-117_GG-WUR-159_GG-WUR-258_GG-WUR-036_GG-WUR-162_GG-WUR-239_GG-WUR-051_GG-WUR-092_GG-WUR-163_GG-WUR-069_GG-WUR-115_GG-WUR-130_GG-WUR-238_GG-WUR-123_GG-WUR-055_GG-WUR-263_GG-WUR-175_GG-WUR-050_GG-WUR-153_GG-WUR-118_GG-WUR-259_G…	953	62|3|0	missense_variant	MODERATE	TCTN1	ENSGALG00000041861	ENSGALT00000060434	3/13	-	287	287	96	I/T	aTa/aCa	-	tolerated(0.09)	-2.633	PTHR14611:SF1&PTHR14611&Pfam_domain:PF07773	-	embryo,limbs/digits/tail,nervous system,cellular,mortality/aging	YES
15	6567136	ATTTTTTTTA	ATTTTTTTA	71798.8	224	430	448	0.959821	414	16	WA_WD_W1	0:59,4:70,12:78	.:GG-WUR-262_GG-WUR-068_GG-WUR-154_GG-WUR-042_GG-WUR-114_GG-WUR-121_GG-WUR-156_GG-WUR-059_GG-WUR-253_GG-WUR-116_GG-WUR-257_GG-WUR-120_GG-WUR-117_GG-WUR-159_GG-WUR-258_GG-WUR-162_GG-WUR-256_GG-WUR-239_GG-WUR-051_GG-WUR-092_GG-WUR-163_GG-WUR-069_GG-WUR-130_GG-WUR-238_GG-WUR-236_GG-WUR-123_GG-WUR-055_GG-WUR-263_GG-WUR-175_GG-WUR-050_GG-WUR-153_GG-WUR-118_GG-WUR-259_GG-WUR-111_GG-WUR-254_GG-WUR-134_G…	1068	64|7|0	splice_donor_variant&intron_variant	HIGH	SART3	ENSGALG00000039472	ENSGALT00000046616	-	14/17	-	-	-	-	-	-	-	NA	-	nucleic acid binding [GO:0003676]; nucleotide binding [GO:0000166]; RNA processing [GO:0006396]nucleic acid binding [GO:0003676]; nucleotide binding [GO:0000166]; RNA processing [GO:0006396]nucleic acid binding [GO:0003676]; nucleotide binding [GO:0000166]; RNA processing [GO:0006396]	hematopoietic	NO
15	7191571	G	A	131387	244	482	488	0.987705	476	6	WA_WD_W1	0:70,0:77,6:91	.:GG-WUR-108_GG-WUR-262_GG-WUR-068_GG-WUR-154_GG-WUR-042_GG-WUR-114_GG-WUR-121_GG-WUR-156_GG-WUR-059_GG-WUR-253_GG-WUR-116_GG-WUR-261_GG-WUR-257_GG-WUR-113_GG-WUR-120_GG-WUR-117_GG-WUR-159_GG-WUR-258_GG-WUR-036_GG-WUR-162_GG-WUR-256_GG-WUR-239_GG-WUR-051_GG-WUR-092_GG-WUR-163_GG-WUR-069_GG-WUR-115_GG-WUR-130_GG-WUR-236_GG-WUR-123_GG-WUR-055_GG-WUR-263_GG-WUR-175_GG-WUR-050_GG-WUR-153_GG-WUR-118_G…	461	0|0|0	splice_acceptor_variant&non_coding_transcript_variant	HIGH	-	ENSGALG00000032676	ENSGALT00000072848	-	1/1	-	-	-	-	-	-	-	NA	-		-	YES
15	11207792	C	T	104543	244	474	488	0.971311	460	14	WA_WD_W1	0:68,10:67,4:95	.:GG-WUR-108_GG-WUR-262_GG-WUR-068_GG-WUR-154_GG-WUR-042_GG-WUR-114_GG-WUR-121_GG-WUR-156_GG-WUR-059_GG-WUR-253_GG-WUR-116_GG-WUR-261_GG-WUR-257_GG-WUR-113_GG-WUR-120_GG-WUR-117_GG-WUR-159_GG-WUR-258_GG-WUR-036_GG-WUR-162_GG-WUR-256_GG-WUR-239_GG-WUR-051_GG-WUR-092_GG-WUR-163_GG-WUR-069_GG-WUR-115_GG-WUR-130_GG-WUR-238_GG-WUR-236_GG-WUR-123_GG-WUR-055_GG-WUR-263_GG-WUR-050_GG-WUR-153_GG-WUR-118_G…	1115	62|4|4	missense_variant	MODERATE	AP1B1	ENSGALG00000042213	ENSGALT00000065498	19/20	-	2729	2713	905	R/C	Cgc/Tgc	-	deleterious(0.05)	-4.962	PTHR11134&PTHR11134:SF12&Pfam_domain:PF09066&3.30.310.10&SMART_domains:SM01020&Superfamily_domains:SSF55711	clathrin adaptor complex [GO:0030131]; protein transporter activity [GO:0008565]; intracellular protein transport [GO:0006886]; vesicle-mediated transport [GO:0016192]clathrin adaptor complex [GO:0030131]; protein transporter activity [GO:0008565]; intracellular protein transport [GO:0006886]; vesicle-mediated transport [GO:0016192]clathrin adaptor complex [GO:0030131]; protein transporter activi…	respiratory,skeleton,growth/size/body,immune,cellular,hematopoietic,cardiovascular	YES
15	11262326	C	A	157131	214	420	428	0.981308	412	8	WA_WD_W1	0:52,0:73,8:81	.:GG-WUR-108_GG-WUR-068_GG-WUR-154_GG-WUR-042_GG-WUR-121_GG-WUR-156_GG-WUR-059_GG-WUR-116_GG-WUR-113_GG-WUR-120_GG-WUR-117_GG-WUR-159_GG-WUR-036_GG-WUR-162_GG-WUR-051_GG-WUR-092_GG-WUR-163_GG-WUR-069_GG-WUR-115_GG-WUR-130_GG-WUR-238_GG-WUR-123_GG-WUR-055_GG-WUR-175_GG-WUR-050_GG-WUR-153_GG-WUR-118_GG-WUR-134_GG-WUR-119_GG-WUR-122_GG-WUR-088_GG-WUR-147_GG-WUR-090_GG-WUR-096_GG-WUR-136_GG-WUR-240_G…	530	57|6|0	missense_variant	MODERATE	RASAL1	ENSGALG00000008150	ENSGALT00000013239	16/21	-	1726	1726	576	A/S	Gca/Tca	-	deleterious(0.04)	0.537	PROSITE_profiles:PS50003&PTHR10194:SF3&PTHR10194&2.30.29.30&Pfam_domain:PF00169&SMART_domains:SM00233&SMART_domains:SM00323&Superfamily_domains:SSF48350&Superfamily_domains:SSF50729	cytosol [GO:0005829]; plasma membrane [GO:0005886]; GTPase activator activity [GO:0005096]; intracellular signal transduction [GO:0035556]; positive regulation of dendrite extension [GO:1903861]	-	YES
15	11263677	C	T	113710	245	478	490	0.97551	466	12	WA_WD_W1	0:69,4:73,8:91	.:GG-WUR-108_GG-WUR-262_GG-WUR-068_GG-WUR-154_GG-WUR-042_GG-WUR-114_GG-WUR-121_GG-WUR-156_GG-WUR-059_GG-WUR-253_GG-WUR-116_GG-WUR-261_GG-WUR-257_GG-WUR-113_GG-WUR-120_GG-WUR-117_GG-WUR-159_GG-WUR-258_GG-WUR-036_GG-WUR-162_GG-WUR-256_GG-WUR-239_GG-WUR-051_GG-WUR-092_GG-WUR-163_GG-WUR-069_GG-WUR-115_GG-WUR-130_GG-WUR-238_GG-WUR-236_GG-WUR-123_GG-WUR-055_GG-WUR-263_GG-WUR-175_GG-WUR-050_GG-WUR-153_G…	382	57|6|0	missense_variant	MODERATE	RASAL1	ENSGALG00000008150	ENSGALT00000013239	14/21	-	1460	1460	487	R/Q	cGg/cAg	-	deleterious(0.04)	-3.713	PROSITE_profiles:PS50018&PTHR10194:SF3&PTHR10194&1.10.506.10&Pfam_domain:PF00616&SMART_domains:SM00323&Superfamily_domains:SSF48350	cytosol [GO:0005829]; plasma membrane [GO:0005886]; GTPase activator activity [GO:0005096]; intracellular signal transduction [GO:0035556]; positive regulation of dendrite extension [GO:1903861]	-	YES
15	11266406	T	C	104178	240	472	480	0.983333	464	8	WA_WD_W1	0:68,0:75,8:89	.:GG-WUR-108_GG-WUR-262_GG-WUR-068_GG-WUR-154_GG-WUR-042_GG-WUR-114_GG-WUR-121_GG-WUR-156_GG-WUR-059_GG-WUR-253_GG-WUR-116_GG-WUR-261_GG-WUR-257_GG-WUR-113_GG-WUR-120_GG-WUR-117_GG-WUR-159_GG-WUR-258_GG-WUR-036_GG-WUR-162_GG-WUR-256_GG-WUR-239_GG-WUR-051_GG-WUR-092_GG-WUR-163_GG-WUR-069_GG-WUR-115_GG-WUR-130_GG-WUR-238_GG-WUR-236_GG-WUR-123_GG-WUR-055_GG-WUR-263_GG-WUR-175_GG-WUR-050_GG-WUR-153_G…	295	57|6|0	missense_variant	MODERATE	RASAL1	ENSGALG00000008150	ENSGALT00000013239	4/21	-	275	275	92	Q/R	cAg/cGg	-	deleterious(0)	1	PTHR10194:SF3&PTHR10194&2.60.40.150&Pfam_domain:PF00168&SMART_domains:SM00239&Superfamily_domains:SSF49562	cytosol [GO:0005829]; plasma membrane [GO:0005886]; GTPase activator activity [GO:0005096]; intracellular signal transduction [GO:0035556]; positive regulation of dendrite extension [GO:1903861]	-	YES
17	1664673	A	G	108388	245	490	490	1	490	0	WA_WD_W1	0:70,0:77,0:98	.:GG-WUR-108_GG-WUR-262_GG-WUR-068_GG-WUR-154_GG-WUR-042_GG-WUR-114_GG-WUR-121_GG-WUR-156_GG-WUR-059_GG-WUR-116_GG-WUR-261_GG-WUR-257_GG-WUR-113_GG-WUR-120_GG-WUR-117_GG-WUR-159_GG-WUR-258_GG-WUR-036_GG-WUR-162_GG-WUR-256_GG-WUR-239_GG-WUR-051_GG-WUR-092_GG-WUR-163_GG-WUR-069_GG-WUR-115_GG-WUR-130_GG-WUR-238_GG-WUR-236_GG-WUR-123_GG-WUR-055_GG-WUR-263_GG-WUR-175_GG-WUR-050_GG-WUR-153_GG-WUR-118_G…	138	0|0|0	splice_acceptor_variant&non_coding_transcript_variant	HIGH	-	ENSGALG00000035977	ENSGALT00000055124	-	1/2	-	-	-	-	-	-	-	NA	-		-	YES
17	5210838	T	A	129878	248	496	496	1	496	0	WA_WD_W1	0:71,0:78,0:99	.:GG-WUR-108_GG-WUR-262_GG-WUR-068_GG-WUR-154_GG-WUR-042_GG-WUR-114_GG-WUR-121_GG-WUR-156_GG-WUR-059_GG-WUR-253_GG-WUR-116_GG-WUR-261_GG-WUR-257_GG-WUR-113_GG-WUR-120_GG-WUR-117_GG-WUR-159_GG-WUR-258_GG-WUR-036_GG-WUR-162_GG-WUR-256_GG-WUR-239_GG-WUR-051_GG-WUR-092_GG-WUR-163_GG-WUR-069_GG-WUR-115_GG-WUR-130_GG-WUR-238_GG-WUR-236_GG-WUR-123_GG-WUR-055_GG-WUR-263_GG-WUR-175_GG-WUR-050_GG-WUR-153_G…	302	48|24|4	missense_variant	MODERATE	COL27A1	ENSGALG00000006958	ENSGALT00000011272	3/53	-	338	338	113	I/N	aTc/aAc	-	deleterious(0)	1	SMART_domains:SM00210&Superfamily_domains:SSF49899	fibrillar collagen trimer [GO:0005583]; extracellular matrix structural constituent [GO:0005201]; extracellular matrix organization [GO:0030198]; growth plate cartilage chondrocyte development [GO:0003431]	embryo,respiratory,skeleton,craniofacial,limbs/digits/tail,mortality/aging,growth/size/body	YES
17	6541328	C	G	131647	240	480	480	1	480	0	WA_WD_W1	0:65,0:77,0:98	.:GG-WUR-108_GG-WUR-068_GG-WUR-154_GG-WUR-042_GG-WUR-114_GG-WUR-121_GG-WUR-156_GG-WUR-059_GG-WUR-253_GG-WUR-116_GG-WUR-257_GG-WUR-113_GG-WUR-120_GG-WUR-117_GG-WUR-159_GG-WUR-258_GG-WUR-036_GG-WUR-162_GG-WUR-256_GG-WUR-239_GG-WUR-051_GG-WUR-092_GG-WUR-163_GG-WUR-069_GG-WUR-115_GG-WUR-130_GG-WUR-238_GG-WUR-236_GG-WUR-123_GG-WUR-055_GG-WUR-175_GG-WUR-050_GG-WUR-153_GG-WUR-118_GG-WUR-259_GG-WUR-252_G…	-46	0|0|0	splice_acceptor_variant&non_coding_transcript_variant	HIGH	-	ENSGALG00000003852	ENSGALT00000006123	-	2/6	-	-	-	-	-	-	-	NA	-		-	YES
17	7249387	CTT	CT	73657.5	199	393	398	0.987437	388	5	WA_WD_W1	0:69,0:75,5:50	.:GG-WUR-108_GG-WUR-262_GG-WUR-068_GG-WUR-154_GG-WUR-042_GG-WUR-114_GG-WUR-121_GG-WUR-156_GG-WUR-059_GG-WUR-253_GG-WUR-116_GG-WUR-261_GG-WUR-257_GG-WUR-113_GG-WUR-120_GG-WUR-117_GG-WUR-159_GG-WUR-258_GG-WUR-036_GG-WUR-162_GG-WUR-256_GG-WUR-239_GG-WUR-051_GG-WUR-092_GG-WUR-163_GG-WUR-069_GG-WUR-115_GG-WUR-130_GG-WUR-238_GG-WUR-236_GG-WUR-123_GG-WUR-055_GG-WUR-263_GG-WUR-175_GG-WUR-050_GG-WUR-153_G…	2977	48|27|0	splice_acceptor_variant&frameshift_variant	HIGH	CEL	ENSGALG00000034436	ENSGALT00000056488	2/12	-	139-140	125-126	42	L/X	cTT/cT	-	-	NA	3.40.50.1820&Pfam_domain:PF00135&PTHR11559&PTHR11559:SF139&Superfamily_domains:SSF53474	hydrolase activity, acting on ester bonds [GO:0016788]; lipid metabolic process [GO:0006629]	homeostasis,digestive/alimentary	NO
17	7249387	CTT	CT	73657.5	199	393	398	0.987437	388	5	WA_WD_W1	0:69,0:75,5:50	.:GG-WUR-108_GG-WUR-262_GG-WUR-068_GG-WUR-154_GG-WUR-042_GG-WUR-114_GG-WUR-121_GG-WUR-156_GG-WUR-059_GG-WUR-253_GG-WUR-116_GG-WUR-261_GG-WUR-257_GG-WUR-113_GG-WUR-120_GG-WUR-117_GG-WUR-159_GG-WUR-258_GG-WUR-036_GG-WUR-162_GG-WUR-256_GG-WUR-239_GG-WUR-051_GG-WUR-092_GG-WUR-163_GG-WUR-069_GG-WUR-115_GG-WUR-130_GG-WUR-238_GG-WUR-236_GG-WUR-123_GG-WUR-055_GG-WUR-263_GG-WUR-175_GG-WUR-050_GG-WUR-153_G…	2977	48|27|0	splice_acceptor_variant&frameshift_variant	HIGH	CEL	ENSGALG00000034436	ENSGALT00000056488	2/12	-	139-140	125-126	42	L/X	cTT/cT	-	-	NA	3.40.50.1820&Pfam_domain:PF00135&PTHR11559&PTHR11559:SF139&Superfamily_domains:SSF53474	hydrolase activity, acting on ester bonds [GO:0016788]; lipid metabolic process [GO:0006629]	homeostasis,digestive/alimentary	NO
17	8199178	C	A	102509	245	456	490	0.930612	428	28	WA_WD_W1	0:68,0:77,28:69	.:GG-WUR-108_GG-WUR-262_GG-WUR-068_GG-WUR-154_GG-WUR-042_GG-WUR-114_GG-WUR-121_GG-WUR-156_GG-WUR-059_GG-WUR-253_GG-WUR-116_GG-WUR-261_GG-WUR-257_GG-WUR-113_GG-WUR-120_GG-WUR-117_GG-WUR-159_GG-WUR-258_GG-WUR-036_GG-WUR-162_GG-WUR-239_GG-WUR-051_GG-WUR-092_GG-WUR-163_GG-WUR-069_GG-WUR-115_GG-WUR-130_GG-WUR-238_GG-WUR-236_GG-WUR-123_GG-WUR-055_GG-WUR-263_GG-WUR-175_GG-WUR-050_GG-WUR-153_GG-WUR-118_G…	1497	51|5|0	missense_variant	MODERATE	-	ENSGALG00000002489	ENSGALT00000039025	3/3	-	3810	3810	1270	D/E	gaC/gaA	-	deleterious_low_confidence(0.02)	-0.522	-	nucleoplasm [GO:0005654]; phosphatase binding [GO:0019902]; protein phosphatase inhibitor activity [GO:0004864]; negative regulation of phosphatase activity [GO:0010923]	-	YES
17	8901536	G	T	94180.8	236	446	472	0.944915	420	26	WA_WD_W1	0:63,26:50,0:97	.:GG-WUR-108_GG-WUR-262_GG-WUR-068_GG-WUR-154_GG-WUR-042_GG-WUR-121_GG-WUR-156_GG-WUR-059_GG-WUR-253_GG-WUR-116_GG-WUR-257_GG-WUR-113_GG-WUR-120_GG-WUR-117_GG-WUR-159_GG-WUR-258_GG-WUR-036_GG-WUR-162_GG-WUR-239_GG-WUR-051_GG-WUR-092_GG-WUR-069_GG-WUR-115_GG-WUR-130_GG-WUR-238_GG-WUR-236_GG-WUR-123_GG-WUR-055_GG-WUR-175_GG-WUR-050_GG-WUR-153_GG-WUR-118_GG-WUR-259_GG-WUR-111_GG-WUR-134_GG-WUR-119_G…	33155	50|23|5	missense_variant	MODERATE	GSN	ENSGALG00000001446	ENSGALT00000002199	8/17	-	1155	1089	363	E/D	gaG/gaT	-	deleterious(0.05)	-1.284	3.40.20.10&Pfam_domain:PF00626&PTHR11977&PTHR11977:SF29&SMART_domains:SM00262&Superfamily_domains:SSF55753	calcium ion binding [GO:0005509]; actin filament severing [GO:0051014]; actin nucleation [GO:0045010]; barbed-end actin filament capping [GO:0051016]calcium ion binding [GO:0005509]; actin filament severing [GO:0051014]; actin nucleation [GO:0045010]; barbed-end actin filament capping [GO:0051016]integral component of membrane [GO:0016021]; calcium ion binding [GO:0005509]; actin filament severin…	respiratory,skeleton,reproductive,endocrine/exocrine,immune,muscle,hematopoietic,cellular,behavior,mortality/aging,integument,nervous system,homeostasis,cardiovascular	YES
18	4764449	C	A	165724	215	430	430	1	430	0	WA_WD_W1	0:54,0:74,0:87	.:GG-WUR-108_GG-WUR-068_GG-WUR-154_GG-WUR-042_GG-WUR-114_GG-WUR-121_GG-WUR-059_GG-WUR-116_GG-WUR-261_GG-WUR-113_GG-WUR-120_GG-WUR-117_GG-WUR-159_GG-WUR-036_GG-WUR-051_GG-WUR-092_GG-WUR-163_GG-WUR-069_GG-WUR-115_GG-WUR-130_GG-WUR-236_GG-WUR-123_GG-WUR-055_GG-WUR-175_GG-WUR-050_GG-WUR-153_GG-WUR-118_GG-WUR-111_GG-WUR-134_GG-WUR-119_GG-WUR-122_GG-WUR-088_GG-WUR-147_GG-WUR-090_GG-WUR-096_GG-WUR-136_G…	25130	30|25|0	missense_variant	MODERATE	H3F3B	ENSGALG00000002286	ENSGALT00000003591	4/4	-	468	349	117	R/S	Cgc/Agc	-	deleterious_low_confidence(0.01)	-4.762	PTHR11426&Pfam_domain:PF00125&1.10.20.10&SMART_domains:SM00428&Superfamily_domains:SSF47113&Prints_domain:PR00622	nucleosome [GO:0000786]; nucleus [GO:0005634]; nucleosomal DNA binding [GO:0031492]; nucleosome assembly [GO:0006334]	embryo,behavior,reproductive,growth/size/body,cellular,no abnormal phenotype observed,mortality/aging	NO
18	5043227	T	C	141922	244	474	488	0.971311	460	14	WA_WD_W1	0:69,0:78,14:83	.:GG-WUR-108_GG-WUR-262_GG-WUR-068_GG-WUR-154_GG-WUR-042_GG-WUR-114_GG-WUR-121_GG-WUR-156_GG-WUR-059_GG-WUR-253_GG-WUR-116_GG-WUR-261_GG-WUR-257_GG-WUR-113_GG-WUR-120_GG-WUR-117_GG-WUR-159_GG-WUR-258_GG-WUR-036_GG-WUR-162_GG-WUR-256_GG-WUR-239_GG-WUR-051_GG-WUR-092_GG-WUR-163_GG-WUR-069_GG-WUR-115_GG-WUR-130_GG-WUR-236_GG-WUR-123_GG-WUR-055_GG-WUR-263_GG-WUR-175_GG-WUR-050_GG-WUR-153_GG-WUR-118_G…	979	19|3|12	missense_variant	MODERATE	cRac1B	ENSGALG00000040606	ENSGALT00000063462	6/6	-	501	467	156	E/G	gAg/gGg	1	deleterious_low_confidence(0.01)	-0.909	PROSITE_profiles:PS51420&Low_complexity_(Seg):seg&SMART_domains:SM00174	intracellular [GO:0005622]; GTP binding [GO:0005525]; small GTPase mediated signal transduction [GO:0007264]intracellular [GO:0005622]; GTP binding [GO:0005525]; small GTPase mediated signal transduction [GO:0007264]intracellular [GO:0005622]; GTP binding [GO:0005525]; small GTPase mediated signal transduction [GO:0007264]cell body fiber [GO:0070852]; intracellular [GO:0005622]; GTP binding [GO:0…	-	YES
18	5047314	TG	CT	101374	249	498	498	1	498	0	WA_WD_W1	0:70,0:78,0:101	.:GG-WUR-108_GG-WUR-262_GG-WUR-068_GG-WUR-154_GG-WUR-042_GG-WUR-114_GG-WUR-121_GG-WUR-156_GG-WUR-059_GG-WUR-253_GG-WUR-116_GG-WUR-261_GG-WUR-257_GG-WUR-113_GG-WUR-120_GG-WUR-117_GG-WUR-159_GG-WUR-258_GG-WUR-036_GG-WUR-162_GG-WUR-256_GG-WUR-239_GG-WUR-051_GG-WUR-092_GG-WUR-163_GG-WUR-069_GG-WUR-115_GG-WUR-130_GG-WUR-238_GG-WUR-236_GG-WUR-123_GG-WUR-055_GG-WUR-263_GG-WUR-175_GG-WUR-050_GG-WUR-153_G…	452	19|3|12	stop_gained	HIGH	cRac1B	ENSGALG00000040606	ENSGALT00000049354	1/6	-	18-19	18-19	2017-07-06	CM/*V	tgCAtg/tgAGtg	1	-	1.181	Prints_domain:PR00449&PROSITE_profiles:PS51420	intracellular [GO:0005622]; GTP binding [GO:0005525]; small GTPase mediated signal transduction [GO:0007264]intracellular [GO:0005622]; GTP binding [GO:0005525]; small GTPase mediated signal transduction [GO:0007264]intracellular [GO:0005622]; GTP binding [GO:0005525]; small GTPase mediated signal transduction [GO:0007264]cell body fiber [GO:0070852]; intracellular [GO:0005622]; GTP binding [GO:0…	-	YES
18	9347523	G	A	156522	210	420	420	1	420	0	WA_WD_W1	0:53,0:73,0:84	.:GG-WUR-108_GG-WUR-068_GG-WUR-154_GG-WUR-042_GG-WUR-114_GG-WUR-121_GG-WUR-156_GG-WUR-059_GG-WUR-116_GG-WUR-113_GG-WUR-120_GG-WUR-117_GG-WUR-159_GG-WUR-036_GG-WUR-162_GG-WUR-051_GG-WUR-092_GG-WUR-163_GG-WUR-069_GG-WUR-115_GG-WUR-130_GG-WUR-123_GG-WUR-055_GG-WUR-175_GG-WUR-050_GG-WUR-153_GG-WUR-118_GG-WUR-111_GG-WUR-134_GG-WUR-119_GG-WUR-122_GG-WUR-088_GG-WUR-147_GG-WUR-090_GG-WUR-096_GG-WUR-136_G…	1719	0|0|0	splice_acceptor_variant&non_coding_transcript_variant	HIGH	-	ENSGALG00000042060	ENSGALT00000055106	-	1/1	-	-	-	-	-	-	-	NA	-		-	YES
18	9697495	CGAGGAGGAGGAGGAGGAGG	CGAGGAGGAGGAGGAGGAGGAGG	53695.5	216	392	432	0.907407	352	40	WA_WD_W1	11:51,9:57,20:68	GG-WUR-253_GG-WUR-257_GG-WUR-117_GG-WUR-159_GG-WUR-239_GG-WUR-238_GG-WUR-055_GG-WUR-252_GG-WUR-255_GG-WUR-143_GG-WUR-237:GG-WUR-108_GG-WUR-262_GG-WUR-154_GG-WUR-042_GG-WUR-114_GG-WUR-121_GG-WUR-156_GG-WUR-059_GG-WUR-116_GG-WUR-261_GG-WUR-113_GG-WUR-120_GG-WUR-258_GG-WUR-162_GG-WUR-256_GG-WUR-051_GG-WUR-092_GG-WUR-163_GG-WUR-069_GG-WUR-115_GG-WUR-130_GG-WUR-236_GG-WUR-123_GG-WUR-263_GG-WUR-175_GG-…	287	41|21|0	inframe_insertion	MODERATE	CBX4	ENSGALG00000035911	ENSGALT00000051639	5/5	-	1551-1569	1447-1465	483-489	EEEEEEA/EEEEEEEA	GAGGAGGAGGAGGAGGAGGct/GAGGAGGAGGAGGAGGAGGAGGct	-	-	-1.015	Low_complexity_(Seg):seg&PTHR22812:SF10&PTHR22812	nucleus [GO:0005634]	immune,mortality/aging,growth/size/body,hematopoietic,endocrine/exocrine	NO
18	10422039	T	C	127683	231	417	462	0.902597	388	29	WA_WD_W1	29:23,0:76,0:95	GG-WUR-108_GG-WUR-068_GG-WUR-114_GG-WUR-121_GG-WUR-059_GG-WUR-116_GG-WUR-257_GG-WUR-159_GG-WUR-162_GG-WUR-239_GG-WUR-092_GG-WUR-069_GG-WUR-115_GG-WUR-123_GG-WUR-175_GG-WUR-153_GG-WUR-119_GG-WUR-122_GG-WUR-136_GG-WUR-039_GG-WUR-054_GG-WUR-260_GG-WUR-129_GG-WUR-097_GG-WUR-094_GG-WUR-155_GG-WUR-089_GG-WUR-143_GG-WUR-112:GG-WUR-154_GG-WUR-042_GG-WUR-156_GG-WUR-113_GG-WUR-117_GG-WUR-036_GG-WUR-051_GG-…	869	61|4|0	missense_variant	MODERATE	MYCBPAP	ENSGALG00000007661	ENSGALT00000012410	11/13	-	1673	1673	558	Y/C	tAc/tGc	-	tolerated(0.2)	-5.024	PTHR12276&PTHR12276:SF54&Pfam_domain:PF14646	cytoplasm [GO:0005737]; spermatogenesis [GO:0007283]	-	YES
18	10427847	G	A	119511	221	442	442	1	442	0	WA_WD_W1	0:56,0:74,0:91	.:GG-WUR-108_GG-WUR-068_GG-WUR-154_GG-WUR-042_GG-WUR-114_GG-WUR-121_GG-WUR-156_GG-WUR-059_GG-WUR-116_GG-WUR-113_GG-WUR-120_GG-WUR-117_GG-WUR-159_GG-WUR-036_GG-WUR-162_GG-WUR-239_GG-WUR-051_GG-WUR-092_GG-WUR-163_GG-WUR-069_GG-WUR-115_GG-WUR-130_GG-WUR-238_GG-WUR-236_GG-WUR-123_GG-WUR-055_GG-WUR-175_GG-WUR-050_GG-WUR-153_GG-WUR-118_GG-WUR-111_GG-WUR-134_GG-WUR-119_GG-WUR-122_GG-WUR-088_GG-WUR-147_G…	448	61|4|0	missense_variant	MODERATE	MYCBPAP	ENSGALG00000007661	ENSGALT00000012410	1/13	-	113	113	38	A/V	gCa/gTa	-	deleterious(0.04)	-0.263	Low_complexity_(Seg):seg	cytoplasm [GO:0005737]; spermatogenesis [GO:0007283]	-	YES
18	10435822	T	G	121479	248	496	496	1	496	0	WA_WD_W1	0:70,0:78,0:100	.:GG-WUR-108_GG-WUR-262_GG-WUR-068_GG-WUR-154_GG-WUR-042_GG-WUR-114_GG-WUR-121_GG-WUR-156_GG-WUR-059_GG-WUR-253_GG-WUR-116_GG-WUR-261_GG-WUR-257_GG-WUR-113_GG-WUR-120_GG-WUR-117_GG-WUR-159_GG-WUR-258_GG-WUR-162_GG-WUR-256_GG-WUR-239_GG-WUR-051_GG-WUR-092_GG-WUR-163_GG-WUR-069_GG-WUR-115_GG-WUR-130_GG-WUR-238_GG-WUR-236_GG-WUR-123_GG-WUR-055_GG-WUR-263_GG-WUR-175_GG-WUR-050_GG-WUR-153_GG-WUR-118_G…	3645	52|30|0	missense_variant	MODERATE	ACSF2	ENSGALG00000019768	ENSGALT00000038263	13/16	-	1620	1620	540	K/N	aaA/aaC	-	deleterious(0.03)	-3.543	PTHR24095&PTHR24095:SF181&Pfam_domain:PF13193&3.30.300.30&Superfamily_domains:SSF56801	catalytic activity [GO:0003824]; metabolic process [GO:0008152]mitochondrion [GO:0005739]; catalytic activity [GO:0003824]; metabolic process [GO:0008152]	adipose,hematopoietic,behavior,no abnormal phenotype observed	YES
18	10481451	G	A	67758.2	213	426	426	1	426	0	WA_WD_W1	0:64,0:64,0:85	.:GG-WUR-108_GG-WUR-262_GG-WUR-068_GG-WUR-154_GG-WUR-042_GG-WUR-114_GG-WUR-121_GG-WUR-156_GG-WUR-059_GG-WUR-253_GG-WUR-116_GG-WUR-261_GG-WUR-257_GG-WUR-113_GG-WUR-120_GG-WUR-159_GG-WUR-258_GG-WUR-036_GG-WUR-162_GG-WUR-256_GG-WUR-239_GG-WUR-051_GG-WUR-092_GG-WUR-163_GG-WUR-069_GG-WUR-115_GG-WUR-130_GG-WUR-238_GG-WUR-236_GG-WUR-123_GG-WUR-055_GG-WUR-263_GG-WUR-050_GG-WUR-153_GG-WUR-118_GG-WUR-252_G…	437	56|9|0	missense_variant	MODERATE	EME1	ENSGALG00000007676	ENSGALT00000012444	1/8	-	406	389	130	S/F	tCt/tTt	-	deleterious(0.04)	-2.226	Low_complexity_(Seg):seg&PTHR21077:SF7&PTHR21077	Holliday junction resolvase complex [GO:0048476]; nucleus [GO:0005634]; DNA binding [GO:0003677]; nuclease activity [GO:0004518]; DNA repair [GO:0006281]cytoplasm [GO:0005737]; Holliday junction resolvase complex [GO:0048476]; nuclear chromatin [GO:0000790]; nuclear heterochromatin [GO:0005720]; DNA binding [GO:0003677]; nuclease activity [GO:0004518]; double-strand break repair [GO:0006302]; int…	immune,hematopoietic	YES
19	167980	T	A	126822	231	462	462	1	462	0	WA_WD_W1	0:58,0:76,0:97	.:GG-WUR-108_GG-WUR-068_GG-WUR-154_GG-WUR-042_GG-WUR-114_GG-WUR-121_GG-WUR-156_GG-WUR-059_GG-WUR-116_GG-WUR-113_GG-WUR-120_GG-WUR-117_GG-WUR-159_GG-WUR-036_GG-WUR-162_GG-WUR-239_GG-WUR-051_GG-WUR-092_GG-WUR-163_GG-WUR-069_GG-WUR-115_GG-WUR-130_GG-WUR-238_GG-WUR-236_GG-WUR-123_GG-WUR-055_GG-WUR-175_GG-WUR-050_GG-WUR-153_GG-WUR-118_GG-WUR-111_GG-WUR-134_GG-WUR-119_GG-WUR-122_GG-WUR-088_GG-WUR-147_G…	1357	63|4|0	splice_donor_variant	HIGH	TBL2	ENSGALG00000031263	ENSGALT00000054509	-	2/4	-	-	-	-	-	-	-	NA	-	-	-	YES
19	4156525	A	C	61115.7	192	384	384	1	384	0	WA_WD_W1	0:64,0:56,0:72	.:GG-WUR-108_GG-WUR-154_GG-WUR-042_GG-WUR-114_GG-WUR-121_GG-WUR-156_GG-WUR-059_GG-WUR-253_GG-WUR-261_GG-WUR-257_GG-WUR-113_GG-WUR-120_GG-WUR-117_GG-WUR-159_GG-WUR-258_GG-WUR-036_GG-WUR-162_GG-WUR-256_GG-WUR-239_GG-WUR-051_GG-WUR-092_GG-WUR-163_GG-WUR-069_GG-WUR-130_GG-WUR-238_GG-WUR-123_GG-WUR-055_GG-WUR-263_GG-WUR-175_GG-WUR-050_GG-WUR-153_GG-WUR-118_GG-WUR-259_GG-WUR-252_GG-WUR-111_GG-WUR-254_G…	2346	55|12|0	missense_variant	MODERATE	DTX2	ENSGALG00000001905	ENSGALT00000002944	10/10	-	1812	1563	521	F/L	ttT/ttG	-	deleterious(0.04)	-0.372	PTHR12622:SF21&PTHR12622	nuclear membrane [GO:0031965]; nucleoplasm [GO:0005654]; zinc ion binding [GO:0008270]; Notch signaling pathway [GO:0007219]	no abnormal phenotype observed	NO
19	4156527	A	T	61642.5	193	386	386	1	386	0	WA_WD_W1	0:64,0:56,0:73	.:GG-WUR-108_GG-WUR-154_GG-WUR-042_GG-WUR-114_GG-WUR-121_GG-WUR-156_GG-WUR-059_GG-WUR-253_GG-WUR-261_GG-WUR-257_GG-WUR-113_GG-WUR-120_GG-WUR-117_GG-WUR-159_GG-WUR-258_GG-WUR-036_GG-WUR-162_GG-WUR-256_GG-WUR-239_GG-WUR-051_GG-WUR-092_GG-WUR-163_GG-WUR-069_GG-WUR-130_GG-WUR-238_GG-WUR-123_GG-WUR-055_GG-WUR-263_GG-WUR-175_GG-WUR-050_GG-WUR-153_GG-WUR-118_GG-WUR-259_GG-WUR-252_GG-WUR-111_GG-WUR-254_G…	2239	55|12|0	missense_variant	MODERATE	DTX2	ENSGALG00000001905	ENSGALT00000002944	10/10	-	1810	1561	521	F/I	Ttt/Att	-	deleterious(0.01)	-1.027	PTHR12622:SF21&PTHR12622	nuclear membrane [GO:0031965]; nucleoplasm [GO:0005654]; zinc ion binding [GO:0008270]; Notch signaling pathway [GO:0007219]	no abnormal phenotype observed	NO
19	5342779	G	A	131907	228	450	456	0.986842	446	4	WA_WD_W1	4:54,0:76,0:93	GG-WUR-261_GG-WUR-130_GG-WUR-056_GG-WUR-237:GG-WUR-108_GG-WUR-068_GG-WUR-154_GG-WUR-042_GG-WUR-114_GG-WUR-121_GG-WUR-156_GG-WUR-059_GG-WUR-116_GG-WUR-113_GG-WUR-120_GG-WUR-117_GG-WUR-159_GG-WUR-036_GG-WUR-162_GG-WUR-051_GG-WUR-092_GG-WUR-163_GG-WUR-069_GG-WUR-115_GG-WUR-123_GG-WUR-055_GG-WUR-263_GG-WUR-175_GG-WUR-050_GG-WUR-153_GG-WUR-118_GG-WUR-111_GG-WUR-134_GG-WUR-119_GG-WUR-122_GG-WUR-088_GG-…	569	50|7|0	missense_variant	MODERATE	RILP	ENSGALG00000002843	ENSGALT00000004484	6/9	-	602	602	201	P/L	cCg/cTg	-	tolerated(0.1)	-2.804	PTHR21502&PTHR21502:SF7&Low_complexity_(Seg):seg	ciliary basal body [GO:0036064]; cytosol [GO:0005829]; endosome membrane [GO:0010008]; late endosome [GO:0005770]; lysosome [GO:0005764]; mitochondrion [GO:0005739]; protein complex [GO:0043234]; dynein light intermediate chain binding [GO:0051959]; small GTPase binding [GO:0031267]; cilium assembly [GO:0060271]; early endosome to late endosome transport [GO:0045022]; endosome to lysosome transpo…	embryo,nervous system,skeleton,respiratory,craniofacial,limbs/digits/tail,hearing/vestibular/ear,renal/urinary,muscle,vision/eye,behavior,mortality/aging,integument,cardiovascular,cellular,growth/size/body,digestive/alimentary	YES
19	5637297	ACCCCCA	ACCCCA	98445.4	239	478	478	1	478	0	WA_WD_W1	0:65,0:78,0:96	.:GG-WUR-108_GG-WUR-262_GG-WUR-068_GG-WUR-154_GG-WUR-042_GG-WUR-114_GG-WUR-121_GG-WUR-156_GG-WUR-059_GG-WUR-253_GG-WUR-116_GG-WUR-261_GG-WUR-113_GG-WUR-120_GG-WUR-117_GG-WUR-159_GG-WUR-258_GG-WUR-036_GG-WUR-162_GG-WUR-239_GG-WUR-051_GG-WUR-092_GG-WUR-163_GG-WUR-069_GG-WUR-115_GG-WUR-130_GG-WUR-236_GG-WUR-123_GG-WUR-055_GG-WUR-263_GG-WUR-175_GG-WUR-050_GG-WUR-153_GG-WUR-118_GG-WUR-259_GG-WUR-252_G…	789	61|6|0	splice_acceptor_variant&intron_variant	HIGH	TMEM199	ENSGALG00000023757	ENSGALT00000039767	-	5/5	-	-	-	-	-	-	-	NA	-	COPI-coated vesicle membrane [GO:0030663]; endoplasmic reticulum-Golgi intermediate compartment membrane [GO:0033116]; integral component of membrane [GO:0016021]	-	NO
19	6242052	C	T	122447	239	467	478	0.976987	458	9	WA_WD_W1	9:57,0:75,0:97	GG-WUR-162_GG-WUR-239_GG-WUR-130_GG-WUR-238_GG-WUR-236_GG-WUR-240_GG-WUR-251_GG-WUR-056_GG-WUR-237:GG-WUR-108_GG-WUR-068_GG-WUR-154_GG-WUR-042_GG-WUR-114_GG-WUR-121_GG-WUR-156_GG-WUR-059_GG-WUR-253_GG-WUR-116_GG-WUR-261_GG-WUR-113_GG-WUR-120_GG-WUR-117_GG-WUR-159_GG-WUR-258_GG-WUR-036_GG-WUR-256_GG-WUR-051_GG-WUR-092_GG-WUR-163_GG-WUR-069_GG-WUR-115_GG-WUR-123_GG-WUR-055_GG-WUR-263_GG-WUR-175_GG-…	284	55|4|0	missense_variant	MODERATE	TMIGD1	ENSGALG00000004262	ENSGALT00000006778	3/6	-	600	376	126	E/K	Gaa/Aaa	-	deleterious(0.01)	-0.675	PROSITE_profiles:PS50835&PTHR10489&2.60.40.10	integral component of membrane [GO:0016021]	-	YES
19	6645987	T	C	110301	242	484	484	1	484	0	WA_WD_W1	0:67,0:76,0:99	.:GG-WUR-108_GG-WUR-262_GG-WUR-068_GG-WUR-154_GG-WUR-042_GG-WUR-121_GG-WUR-156_GG-WUR-059_GG-WUR-253_GG-WUR-116_GG-WUR-261_GG-WUR-257_GG-WUR-113_GG-WUR-120_GG-WUR-117_GG-WUR-159_GG-WUR-036_GG-WUR-162_GG-WUR-256_GG-WUR-239_GG-WUR-051_GG-WUR-092_GG-WUR-163_GG-WUR-069_GG-WUR-115_GG-WUR-130_GG-WUR-238_GG-WUR-236_GG-WUR-123_GG-WUR-055_GG-WUR-263_GG-WUR-175_GG-WUR-050_GG-WUR-153_GG-WUR-118_GG-WUR-259_G…	1253	61|4|0	missense_variant	MODERATE	CTNS	ENSGALG00000004628	ENSGALT00000007373	10/11	-	1084	916	306	I/V	Att/Gtt	-	deleterious(0.02)	0.875	Pfam_domain:PF04193&PTHR13131&PTHR13131:SF9&SMART_domains:SM00679&TIGRFAM_domain:TIGR00951&Transmembrane_helices:TMhelix	extracellular exosome [GO:0070062]; integral component of membrane [GO:0016021]; intermediate filament cytoskeleton [GO:0045111]; late endosome [GO:0005770]; lysosomal membrane [GO:0005765]; L-cystine transmembrane transporter activity [GO:0015184]; adult walking behavior [GO:0007628]; ATP metabolic process [GO:0046034]; brain development [GO:0007420]; glutathione metabolic process [GO:0006749]; …	muscle,behavior,vision/eye,cellular,pigmentation,homeostasis,skeleton	YES
19	9494498	ACTA	ACTCTA	104850	239	478	478	1	478	0	WA_WD_W1	0:68,0:75,0:96	.:GG-WUR-108_GG-WUR-262_GG-WUR-068_GG-WUR-154_GG-WUR-042_GG-WUR-114_GG-WUR-121_GG-WUR-156_GG-WUR-059_GG-WUR-253_GG-WUR-116_GG-WUR-261_GG-WUR-113_GG-WUR-120_GG-WUR-117_GG-WUR-159_GG-WUR-258_GG-WUR-036_GG-WUR-162_GG-WUR-239_GG-WUR-051_GG-WUR-092_GG-WUR-163_GG-WUR-069_GG-WUR-115_GG-WUR-130_GG-WUR-238_GG-WUR-123_GG-WUR-055_GG-WUR-263_GG-WUR-175_GG-WUR-050_GG-WUR-153_GG-WUR-118_GG-WUR-259_GG-WUR-252_G…	1542	54|25|0	splice_donor_variant	HIGH	CLUH	ENSGALG00000005854	ENSGALT00000009407	-	25/25	-	-	-	-	-	-	-	NA	-	cytoplasm [GO:0005737]; mRNA binding [GO:0003729]; intracellular distribution of mitochondria [GO:0048312]	-	YES
20	838873	T	C	133306	246	492	492	1	492	0	WA_WD_W1	0:68,0:78,0:100	.:GG-WUR-108_GG-WUR-262_GG-WUR-068_GG-WUR-154_GG-WUR-042_GG-WUR-114_GG-WUR-121_GG-WUR-156_GG-WUR-059_GG-WUR-253_GG-WUR-116_GG-WUR-261_GG-WUR-113_GG-WUR-120_GG-WUR-117_GG-WUR-159_GG-WUR-258_GG-WUR-036_GG-WUR-162_GG-WUR-256_GG-WUR-239_GG-WUR-051_GG-WUR-092_GG-WUR-163_GG-WUR-069_GG-WUR-115_GG-WUR-130_GG-WUR-238_GG-WUR-236_GG-WUR-123_GG-WUR-055_GG-WUR-263_GG-WUR-175_GG-WUR-050_GG-WUR-153_GG-WUR-118_G…	-8	0|0|0	splice_acceptor_variant&non_coding_transcript_variant	HIGH	-	ENSGALG00000029930	ENSGALT00000052598	-	2/2	-	-	-	-	-	-	-	NA	-		-	YES
20	1001070	G	T	144090	226	452	452	1	452	0	WA_WD_W1	0:57,0:75,0:94	.:GG-WUR-108_GG-WUR-068_GG-WUR-154_GG-WUR-042_GG-WUR-114_GG-WUR-121_GG-WUR-156_GG-WUR-059_GG-WUR-116_GG-WUR-113_GG-WUR-120_GG-WUR-117_GG-WUR-159_GG-WUR-036_GG-WUR-162_GG-WUR-239_GG-WUR-051_GG-WUR-092_GG-WUR-163_GG-WUR-069_GG-WUR-115_GG-WUR-130_GG-WUR-238_GG-WUR-123_GG-WUR-055_GG-WUR-175_GG-WUR-050_GG-WUR-153_GG-WUR-118_GG-WUR-111_GG-WUR-134_GG-WUR-119_GG-WUR-122_GG-WUR-088_GG-WUR-147_GG-WUR-090_G…	1364	17|8|0	missense_variant	MODERATE	-	ENSGALG00000001536	ENSGALT00000002335	2/10	-	155	155	52	P/H	cCc/cAc	-	tolerated(0.27)	-3.388	PROSITE_profiles:PS50020&PTHR23177:SF7&PTHR23177&SMART_domains:SM00456&Superfamily_domains:SSF51045	cytoskeleton [GO:0005856]; signal transduction [GO:0007165]cytoskeleton [GO:0005856]; signal transduction [GO:0007165]	-	NO
20	2729067	C	T	62582.4	202	404	404	1	404	0	WA_WD_W1	0:58,0:60,0:84	.:GG-WUR-262_GG-WUR-068_GG-WUR-154_GG-WUR-042_GG-WUR-114_GG-WUR-121_GG-WUR-156_GG-WUR-059_GG-WUR-253_GG-WUR-116_GG-WUR-257_GG-WUR-113_GG-WUR-120_GG-WUR-159_GG-WUR-258_GG-WUR-162_GG-WUR-256_GG-WUR-239_GG-WUR-051_GG-WUR-092_GG-WUR-163_GG-WUR-069_GG-WUR-238_GG-WUR-236_GG-WUR-123_GG-WUR-055_GG-WUR-263_GG-WUR-175_GG-WUR-153_GG-WUR-118_GG-WUR-259_GG-WUR-111_GG-WUR-119_GG-WUR-122_GG-WUR-088_GG-WUR-147_G…	172150	50|8|15	missense_variant	MODERATE	MYH7B	ENSGALG00000030985	ENSGALT00000067706	26/42	-	3130	3130	1044	G/R	Ggg/Agg	-	-	-5.324	Coiled-coils_(Ncoils):Coil&PTHR13140:SF358&PTHR13140&Pfam_domain:PF01576&Superfamily_domains:SSF90257	myosin complex [GO:0016459]; ATP binding [GO:0005524]; motor activity [GO:0003774]myosin complex [GO:0016459]; ATP binding [GO:0005524]; motor activity [GO:0003774]	-	NO
20	2729585	TG	AA	114539	245	490	490	1	490	0	WA_WD_W1	0:70,0:76,0:99	.:GG-WUR-108_GG-WUR-262_GG-WUR-068_GG-WUR-154_GG-WUR-042_GG-WUR-114_GG-WUR-121_GG-WUR-156_GG-WUR-059_GG-WUR-253_GG-WUR-116_GG-WUR-261_GG-WUR-257_GG-WUR-113_GG-WUR-120_GG-WUR-117_GG-WUR-159_GG-WUR-258_GG-WUR-036_GG-WUR-162_GG-WUR-256_GG-WUR-239_GG-WUR-051_GG-WUR-092_GG-WUR-163_GG-WUR-069_GG-WUR-115_GG-WUR-130_GG-WUR-238_GG-WUR-236_GG-WUR-123_GG-WUR-055_GG-WUR-263_GG-WUR-175_GG-WUR-050_GG-WUR-153_G…	46754	50|8|15	missense_variant	MODERATE	MYH7B	ENSGALG00000030985	ENSGALT00000067706	25/42	-	2960-2961	2960-2961	987	T/I	aCA/aTT	-	-	-3.881	Coiled-coils_(Ncoils):Coil&PTHR13140:SF358&PTHR13140&Pfam_domain:PF01576&Superfamily_domains:SSF90257	myosin complex [GO:0016459]; ATP binding [GO:0005524]; motor activity [GO:0003774]myosin complex [GO:0016459]; ATP binding [GO:0005524]; motor activity [GO:0003774]	-	NO
20	2730027	T	G	65716.8	211	421	422	0.99763	420	1	WA_WD_W1	0:63,0:67,1:80	.:GG-WUR-262_GG-WUR-068_GG-WUR-154_GG-WUR-042_GG-WUR-114_GG-WUR-121_GG-WUR-156_GG-WUR-059_GG-WUR-253_GG-WUR-116_GG-WUR-261_GG-WUR-257_GG-WUR-113_GG-WUR-120_GG-WUR-159_GG-WUR-036_GG-WUR-162_GG-WUR-239_GG-WUR-051_GG-WUR-092_GG-WUR-069_GG-WUR-115_GG-WUR-130_GG-WUR-238_GG-WUR-236_GG-WUR-123_GG-WUR-055_GG-WUR-175_GG-WUR-050_GG-WUR-153_GG-WUR-118_GG-WUR-259_GG-WUR-252_GG-WUR-111_GG-WUR-254_GG-WUR-134_G…	26364	50|8|15	missense_variant	MODERATE	MYH7B	ENSGALG00000030985	ENSGALT00000067706	24/42	-	2901	2901	967	L/F	ttA/ttC	-	-	-3.168	Coiled-coils_(Ncoils):Coil&PTHR13140:SF358&PTHR13140&Pfam_domain:PF01576&Superfamily_domains:SSF90257	myosin complex [GO:0016459]; ATP binding [GO:0005524]; motor activity [GO:0003774]myosin complex [GO:0016459]; ATP binding [GO:0005524]; motor activity [GO:0003774]	-	NO
20	2730081	C	G	106649	247	494	494	1	494	0	WA_WD_W1	0:71,0:78,0:98	.:GG-WUR-108_GG-WUR-262_GG-WUR-068_GG-WUR-154_GG-WUR-042_GG-WUR-114_GG-WUR-121_GG-WUR-156_GG-WUR-059_GG-WUR-253_GG-WUR-116_GG-WUR-261_GG-WUR-257_GG-WUR-113_GG-WUR-120_GG-WUR-117_GG-WUR-159_GG-WUR-258_GG-WUR-036_GG-WUR-162_GG-WUR-256_GG-WUR-239_GG-WUR-051_GG-WUR-092_GG-WUR-163_GG-WUR-069_GG-WUR-115_GG-WUR-130_GG-WUR-238_GG-WUR-236_GG-WUR-123_GG-WUR-055_GG-WUR-263_GG-WUR-175_GG-WUR-050_GG-WUR-153_G…	1965	50|8|15	missense_variant	MODERATE	MYH7B	ENSGALG00000030985	ENSGALT00000067706	24/42	-	2847	2847	949	R/S	agG/agC	-	-	-5.327	Coiled-coils_(Ncoils):Coil&PTHR13140:SF358&PTHR13140&Pfam_domain:PF01576&Superfamily_domains:SSF90257	myosin complex [GO:0016459]; ATP binding [GO:0005524]; motor activity [GO:0003774]myosin complex [GO:0016459]; ATP binding [GO:0005524]; motor activity [GO:0003774]	-	NO
20	6408034	T	C	91598.6	231	452	462	0.978355	442	10	WA_WD_W1	1:61,9:64,0:96	GG-WUR-163:GG-WUR-108_GG-WUR-262_GG-WUR-068_GG-WUR-154_GG-WUR-042_GG-WUR-121_GG-WUR-156_GG-WUR-059_GG-WUR-116_GG-WUR-261_GG-WUR-257_GG-WUR-113_GG-WUR-120_GG-WUR-117_GG-WUR-159_GG-WUR-036_GG-WUR-162_GG-WUR-239_GG-WUR-051_GG-WUR-092_GG-WUR-069_GG-WUR-115_GG-WUR-130_GG-WUR-238_GG-WUR-236_GG-WUR-123_GG-WUR-055_GG-WUR-175_GG-WUR-050_GG-WUR-153_GG-WUR-118_GG-WUR-111_GG-WUR-254_GG-WUR-134_GG-WUR-119_GG-…	1993	57|2|0	missense_variant	MODERATE	PREX1	ENSGALG00000004621	ENSGALT00000007358	19/40	-	2112	2112	704	I/M	atA/atG	-	deleterious(0)	-2.638	PTHR22829:SF6&PTHR22829&2.30.42.10&SMART_domains:SM00228&Superfamily_domains:SSF50156	cytoplasm [GO:0005737]; cytosol [GO:0005829]; intracellular membrane-bounded organelle [GO:0043231]; plasma membrane [GO:0005886]; phospholipid binding [GO:0005543]; Rac guanyl-nucleotide exchange factor activity [GO:0030676]; G-protein coupled receptor signaling pathway [GO:0007186]; intracellular signal transduction [GO:0035556]; negative regulation of protein kinase activity [GO:0006469]; nega…	embryo,behavior,reproductive,growth/size/body,endocrine/exocrine,liver/biliary,immune,cellular,mortality/aging,nervous system,hematopoietic	YES
20	6631493	ATTTTTA	ATTTTA	113807	248	483	496	0.97379	470	13	WA_WD_W1	0:71,12:66,1:98	.:GG-WUR-108_GG-WUR-262_GG-WUR-068_GG-WUR-154_GG-WUR-042_GG-WUR-114_GG-WUR-121_GG-WUR-156_GG-WUR-059_GG-WUR-253_GG-WUR-116_GG-WUR-261_GG-WUR-257_GG-WUR-113_GG-WUR-120_GG-WUR-117_GG-WUR-159_GG-WUR-258_GG-WUR-036_GG-WUR-162_GG-WUR-256_GG-WUR-239_GG-WUR-051_GG-WUR-092_GG-WUR-163_GG-WUR-069_GG-WUR-115_GG-WUR-130_GG-WUR-238_GG-WUR-236_GG-WUR-123_GG-WUR-055_GG-WUR-263_GG-WUR-175_GG-WUR-050_GG-WUR-153_G…	302	61|4|0	splice_acceptor_variant&intron_variant	HIGH	STAU1	ENSGALG00000004736	ENSGALT00000007541	-	1/15	-	-	-	-	-	-	-	NA	-	cell body [GO:0044297]; cytoplasmic ribonucleoprotein granule [GO:0036464]; dendrite [GO:0030425]; endoplasmic reticulum [GO:0005783]; extracellular exosome [GO:0070062]; plasma membrane [GO:0005886]; poly(A) RNA binding [GO:0044822]; positive regulation by virus of viral protein levels in host cell [GO:0046726]; positive regulation of viral genome replication [GO:0045070]	nervous system,behavior	YES
20	6819169	T	C	133627	248	496	496	1	496	0	WA_WD_W1	0:70,0:77,0:101	.:GG-WUR-108_GG-WUR-262_GG-WUR-068_GG-WUR-154_GG-WUR-042_GG-WUR-121_GG-WUR-156_GG-WUR-059_GG-WUR-253_GG-WUR-116_GG-WUR-261_GG-WUR-257_GG-WUR-113_GG-WUR-120_GG-WUR-117_GG-WUR-159_GG-WUR-258_GG-WUR-036_GG-WUR-162_GG-WUR-256_GG-WUR-239_GG-WUR-051_GG-WUR-092_GG-WUR-163_GG-WUR-069_GG-WUR-115_GG-WUR-130_GG-WUR-238_GG-WUR-236_GG-WUR-123_GG-WUR-055_GG-WUR-263_GG-WUR-175_GG-WUR-050_GG-WUR-153_GG-WUR-118_G…	63	0|0|0	splice_acceptor_variant&non_coding_transcript_variant	HIGH	-	ENSGALG00000042613	ENSGALT00000050620	-	2/2	-	-	-	-	-	-	-	NA	-		-	YES
20	6907386	C	T	130452	229	446	458	0.973799	434	12	WA_WD_W1	0:61,12:63,0:93	.:GG-WUR-108_GG-WUR-068_GG-WUR-154_GG-WUR-042_GG-WUR-114_GG-WUR-121_GG-WUR-156_GG-WUR-059_GG-WUR-116_GG-WUR-261_GG-WUR-113_GG-WUR-120_GG-WUR-117_GG-WUR-159_GG-WUR-258_GG-WUR-036_GG-WUR-162_GG-WUR-051_GG-WUR-092_GG-WUR-163_GG-WUR-069_GG-WUR-115_GG-WUR-130_GG-WUR-238_GG-WUR-236_GG-WUR-123_GG-WUR-055_GG-WUR-263_GG-WUR-175_GG-WUR-050_GG-WUR-153_GG-WUR-118_GG-WUR-111_GG-WUR-134_GG-WUR-119_GG-WUR-122_G…	3756	63|15|0	missense_variant	MODERATE	ZNFX1	ENSGALG00000004859	ENSGALT00000007763	13/13	-	5525	5525	1842	R/H	cGt/cAt	-	deleterious(0.01)	-1.859	-	poly(A) RNA binding [GO:0044822]	-	YES
20	7062019	T	C	142031	222	444	444	1	444	0	WA_WD_W1	0:56,0:74,0:92	.:GG-WUR-108_GG-WUR-068_GG-WUR-154_GG-WUR-042_GG-WUR-121_GG-WUR-156_GG-WUR-059_GG-WUR-116_GG-WUR-113_GG-WUR-120_GG-WUR-117_GG-WUR-159_GG-WUR-258_GG-WUR-036_GG-WUR-162_GG-WUR-051_GG-WUR-092_GG-WUR-163_GG-WUR-069_GG-WUR-115_GG-WUR-130_GG-WUR-236_GG-WUR-123_GG-WUR-055_GG-WUR-175_GG-WUR-050_GG-WUR-153_GG-WUR-118_GG-WUR-111_GG-WUR-134_GG-WUR-119_GG-WUR-122_GG-WUR-088_GG-WUR-147_GG-WUR-090_GG-WUR-096_G…	1426	45|8|0	splice_donor_variant	HIGH	FAM217B	ENSGALG00000026542	ENSGALT00000042985	-	1/4	-	-	-	-	-	-	-	NA	-	-	-	YES
20	8218897	C	T	125331	242	484	484	1	484	0	WA_WD_W1	0:66,0:77,0:99	.:GG-WUR-108_GG-WUR-068_GG-WUR-154_GG-WUR-042_GG-WUR-114_GG-WUR-121_GG-WUR-156_GG-WUR-059_GG-WUR-253_GG-WUR-116_GG-WUR-261_GG-WUR-257_GG-WUR-113_GG-WUR-120_GG-WUR-117_GG-WUR-159_GG-WUR-036_GG-WUR-162_GG-WUR-256_GG-WUR-239_GG-WUR-051_GG-WUR-092_GG-WUR-163_GG-WUR-069_GG-WUR-115_GG-WUR-130_GG-WUR-238_GG-WUR-236_GG-WUR-123_GG-WUR-055_GG-WUR-263_GG-WUR-175_GG-WUR-050_GG-WUR-153_GG-WUR-118_GG-WUR-259_G…	582	55|6|6	missense_variant	MODERATE	GATA5	ENSGALG00000005352	ENSGALT00000008583	2/6	-	596	596	199	R/K	aGg/aAg	1	tolerated(0.06)	-2.523	PROSITE_profiles:PS50114&PTHR10071:SF205&PTHR10071&PS00344&Pfam_domain:PF00320&PIRSF_domain:PIRSF003028&3.30.50.10&SMART_domains:SM00401&Superfamily_domains:SSF57716&Prints_domain:PR00619	nucleus [GO:0005634]; sequence-specific DNA binding [GO:0043565]; transcription factor activity, sequence-specific DNA binding [GO:0003700]; transcription regulatory region DNA binding [GO:0044212]; zinc ion binding [GO:0008270]; positive regulation of transcription from RNA polymerase II promoter [GO:0045944]nucleus [GO:0005634]; enhancer sequence-specific DNA binding [GO:0001158]; transcription…	skeleton,reproductive,endocrine/exocrine,immune,renal/urinary,cardiovascular,integument,muscle,homeostasis,digestive/alimentary	NO
20	10242393	GA	GAGAA	108859	246	492	492	1	492	0	WA_WD_W1	0:69,0:77,0:100	.:GG-WUR-108_GG-WUR-262_GG-WUR-068_GG-WUR-154_GG-WUR-042_GG-WUR-114_GG-WUR-121_GG-WUR-156_GG-WUR-059_GG-WUR-253_GG-WUR-116_GG-WUR-261_GG-WUR-257_GG-WUR-113_GG-WUR-120_GG-WUR-159_GG-WUR-258_GG-WUR-162_GG-WUR-256_GG-WUR-239_GG-WUR-051_GG-WUR-092_GG-WUR-163_GG-WUR-069_GG-WUR-115_GG-WUR-130_GG-WUR-238_GG-WUR-236_GG-WUR-123_GG-WUR-055_GG-WUR-263_GG-WUR-175_GG-WUR-050_GG-WUR-153_GG-WUR-118_GG-WUR-259_G…	1292	62|4|0	inframe_insertion	MODERATE	TPX2	ENSGALG00000006267	ENSGALT00000010129	7/16	-	1208	821	274	E/EK	gAg/gAGAAg	-	-	1	PTHR14326:SF9&PTHR14326	microtubule [GO:0005874]; spindle [GO:0005819]; activation of protein kinase activity [GO:0032147]; regulation of mitotic spindle organization [GO:0060236]	embryo,reproductive,endocrine/exocrine,immune,neoplasm,cellular,mortality/aging,nervous system,hematopoietic	YES
20	10254812	CCCACCAA	CCCAA	116862	239	478	478	1	478	0	WA_WD_W1	0:63,0:77,0:99	.:GG-WUR-108_GG-WUR-068_GG-WUR-154_GG-WUR-042_GG-WUR-114_GG-WUR-121_GG-WUR-156_GG-WUR-059_GG-WUR-116_GG-WUR-261_GG-WUR-113_GG-WUR-120_GG-WUR-117_GG-WUR-159_GG-WUR-258_GG-WUR-036_GG-WUR-162_GG-WUR-239_GG-WUR-051_GG-WUR-092_GG-WUR-163_GG-WUR-069_GG-WUR-115_GG-WUR-130_GG-WUR-238_GG-WUR-236_GG-WUR-123_GG-WUR-055_GG-WUR-263_GG-WUR-175_GG-WUR-050_GG-WUR-153_GG-WUR-118_GG-WUR-259_GG-WUR-252_GG-WUR-111_G…	10270	44|5|0	inframe_deletion	MODERATE	MYLK2	ENSGALG00000006273	ENSGALT00000010138	3/12	-	1371-1377	1186-1192	396-398	PPM/PM	CCACCAAtg/CCAAtg	-	-	1.589	PTHR24347&PTHR24347:SF118	cytoplasm [GO:0005737]; nucleus [GO:0005634]; ATP binding [GO:0005524]; myosin light chain kinase activity [GO:0004687]; cardiac muscle tissue morphogenesis [GO:0055008]; intracellular signal transduction [GO:0035556]; neuromuscular synaptic transmission [GO:0007274]; peptidyl-serine phosphorylation [GO:0018105]; peptidyl-threonine phosphorylation [GO:0018107]; positive regulation of gene express…	muscle	NO
20	10730505	A	G	191151	206	411	412	0.997573	410	1	WA_WD_W1	0:47,0:75,1:83	.:GG-WUR-108_GG-WUR-068_GG-WUR-154_GG-WUR-042_GG-WUR-121_GG-WUR-156_GG-WUR-059_GG-WUR-116_GG-WUR-113_GG-WUR-120_GG-WUR-117_GG-WUR-159_GG-WUR-036_GG-WUR-162_GG-WUR-051_GG-WUR-092_GG-WUR-163_GG-WUR-069_GG-WUR-115_GG-WUR-130_GG-WUR-123_GG-WUR-175_GG-WUR-050_GG-WUR-153_GG-WUR-118_GG-WUR-111_GG-WUR-134_GG-WUR-119_GG-WUR-088_GG-WUR-090_GG-WUR-096_GG-WUR-136_GG-WUR-160_GG-WUR-135_GG-WUR-164_GG-WUR-054_G…	1707	60|12|0	missense_variant	MODERATE	CTSA	ENSGALG00000006876	ENSGALT00000082886	2/13	-	284	284	95	H/R	cAc/cGc	-	deleterious(0)	-2.586	PTHR11802&PTHR11802:SF8&3.40.50.1820&Pfam_domain:PF00450&Superfamily_domains:SSF53474	nucleoplasm [GO:0005654]; serine-type carboxypeptidase activity [GO:0004185]; proteolysis involved in cellular protein catabolic process [GO:0051603]serine-type carboxypeptidase activity [GO:0004185]serine-type carboxypeptidase activity [GO:0004185]	respiratory,cellular,craniofacial,liver/biliary,immune,renal/urinary,hematopoietic,behavior,no abnormal phenotype observed,mortality/aging,integument,growth/size/body,homeostasis,cardiovascular	YES
20	10734900	GTT	GT	115718	232	445	464	0.959052	426	19	WA_WD_W1	4:56,10:67,5:90	GG-WUR-108_GG-WUR-050_GG-WUR-053_GG-WUR-035:GG-WUR-068_GG-WUR-154_GG-WUR-042_GG-WUR-121_GG-WUR-156_GG-WUR-059_GG-WUR-116_GG-WUR-261_GG-WUR-113_GG-WUR-120_GG-WUR-117_GG-WUR-159_GG-WUR-036_GG-WUR-162_GG-WUR-239_GG-WUR-051_GG-WUR-092_GG-WUR-163_GG-WUR-069_GG-WUR-115_GG-WUR-130_GG-WUR-238_GG-WUR-236_GG-WUR-123_GG-WUR-055_GG-WUR-263_GG-WUR-175_GG-WUR-153_GG-WUR-118_GG-WUR-111_GG-WUR-134_GG-WUR-119_GG-…	869	59|1|5	frameshift_variant&splice_region_variant	HIGH	PLTP	ENSGALG00000036686	ENSGALT00000070201	15/16	-	1025-1026	1025-1026	342	K/X	aAA/aA	-	-	NA	PTHR10504&PTHR10504:SF16&1ewfA02&Pfam_domain:PF02886&SMART_domains:SM00329&Superfamily_domains:SSF55394	lipid binding [GO:0008289]; lipid metabolic process [GO:0006629]lipid binding [GO:0008289]; lipid metabolic process [GO:0006629]	vision/eye,reproductive,homeostasis	NO
20	10734915	CGGGGGGGGGA	CGGGGGGGA	112860	238	476	476	1	476	0	WA_WD_W1	0:62,0:78,0:98	.:GG-WUR-108_GG-WUR-068_GG-WUR-154_GG-WUR-042_GG-WUR-121_GG-WUR-156_GG-WUR-059_GG-WUR-116_GG-WUR-261_GG-WUR-257_GG-WUR-113_GG-WUR-120_GG-WUR-117_GG-WUR-159_GG-WUR-036_GG-WUR-162_GG-WUR-256_GG-WUR-239_GG-WUR-051_GG-WUR-092_GG-WUR-163_GG-WUR-069_GG-WUR-115_GG-WUR-130_GG-WUR-238_GG-WUR-236_GG-WUR-123_GG-WUR-055_GG-WUR-263_GG-WUR-175_GG-WUR-050_GG-WUR-153_GG-WUR-118_GG-WUR-111_GG-WUR-134_GG-WUR-119_G…	643	59|1|5	inframe_deletion	MODERATE	PLTP	ENSGALG00000036686	ENSGALT00000070201	13-14/16	13/15	1005-1012	1005-1012	335-338	APPPX/APPR	gcTCCCCCCCCCgc/gcTCCCCCCCgc	-	-	1	PTHR10504&PTHR10504:SF16&1ewfA02&Pfam_domain:PF02886&SMART_domains:SM00329&Superfamily_domains:SSF55394	lipid binding [GO:0008289]; lipid metabolic process [GO:0006629]lipid binding [GO:0008289]; lipid metabolic process [GO:0006629]	vision/eye,reproductive,homeostasis	NO
20	10736946	GCCCCCT	GCCCCT	128273	222	444	444	1	444	0	WA_WD_W1	0:57,0:74,0:91	.:GG-WUR-108_GG-WUR-068_GG-WUR-154_GG-WUR-042_GG-WUR-114_GG-WUR-121_GG-WUR-156_GG-WUR-059_GG-WUR-116_GG-WUR-113_GG-WUR-120_GG-WUR-117_GG-WUR-159_GG-WUR-036_GG-WUR-162_GG-WUR-239_GG-WUR-051_GG-WUR-092_GG-WUR-163_GG-WUR-069_GG-WUR-115_GG-WUR-130_GG-WUR-238_GG-WUR-236_GG-WUR-123_GG-WUR-055_GG-WUR-175_GG-WUR-050_GG-WUR-153_GG-WUR-118_GG-WUR-111_GG-WUR-134_GG-WUR-119_GG-WUR-122_GG-WUR-088_GG-WUR-147_G…	264	59|1|5	splice_acceptor_variant&inframe_deletion	HIGH	PLTP	ENSGALG00000036686	ENSGALT00000070201	1-2/16	1/15	98-102	98-102	33-34	KGX/KG	aAGGGGG/aAGGGG	-	-	1	PTHR10504&PTHR10504:SF16&1ewfA01&Pfam_domain:PF01273&SMART_domains:SM00328&Superfamily_domains:SSF55394	lipid binding [GO:0008289]; lipid metabolic process [GO:0006629]lipid binding [GO:0008289]; lipid metabolic process [GO:0006629]	vision/eye,reproductive,homeostasis	NO
20	11738103	CGGGGGGGC	CGGGGGGC	92730.7	242	484	484	1	484	0	WA_WD_W1	0:67,0:78,0:97	.:GG-WUR-108_GG-WUR-068_GG-WUR-154_GG-WUR-042_GG-WUR-114_GG-WUR-121_GG-WUR-156_GG-WUR-059_GG-WUR-253_GG-WUR-116_GG-WUR-261_GG-WUR-257_GG-WUR-113_GG-WUR-120_GG-WUR-117_GG-WUR-159_GG-WUR-258_GG-WUR-036_GG-WUR-162_GG-WUR-256_GG-WUR-239_GG-WUR-051_GG-WUR-092_GG-WUR-163_GG-WUR-069_GG-WUR-115_GG-WUR-130_GG-WUR-238_GG-WUR-236_GG-WUR-123_GG-WUR-055_GG-WUR-263_GG-WUR-175_GG-WUR-050_GG-WUR-153_GG-WUR-118_G…	1535	54|4|0	frameshift_variant	HIGH	PMEPA1	ENSGALG00000037780	ENSGALT00000075930	4/4	-	589-596	589-596	197-199	GGA/GGX	GGGGGGGCc/GGGGGGCc	-	-	NA	PTHR16514&PTHR16514:SF5	integral component of membrane [GO:0016021]early endosome membrane [GO:0031901]; Golgi membrane [GO:0000139]; integral component of membrane [GO:0016021]; nucleoplasm [GO:0005654]; negative regulation of pathway-restricted SMAD protein phosphorylation [GO:0060394]; negative regulation of SMAD protein complex assembly [GO:0010991]; negative regulation of transforming growth factor beta receptor si…	-	NO
20	11738115	GCCCCCCCCA	GCCCCCCCA	83722	243	486	486	1	486	0	WA_WD_W1	0:68,0:78,0:97	.:GG-WUR-108_GG-WUR-068_GG-WUR-154_GG-WUR-042_GG-WUR-114_GG-WUR-121_GG-WUR-156_GG-WUR-059_GG-WUR-253_GG-WUR-116_GG-WUR-261_GG-WUR-257_GG-WUR-113_GG-WUR-120_GG-WUR-117_GG-WUR-159_GG-WUR-258_GG-WUR-036_GG-WUR-162_GG-WUR-256_GG-WUR-239_GG-WUR-051_GG-WUR-092_GG-WUR-163_GG-WUR-069_GG-WUR-115_GG-WUR-130_GG-WUR-238_GG-WUR-236_GG-WUR-123_GG-WUR-055_GG-WUR-263_GG-WUR-175_GG-WUR-050_GG-WUR-153_GG-WUR-118_G…	1548	54|4|0	inframe_deletion&splice_region_variant	MODERATE	PMEPA1	ENSGALG00000037780	ENSGALT00000051401	5-6/6	5/5	768-775	609-616	203-206	CPPQX/CPPS	tgCCCCCCCCAgc/tgCCCCCCCAgc	-	-	1	PTHR16514&PTHR16514:SF5	integral component of membrane [GO:0016021]early endosome membrane [GO:0031901]; Golgi membrane [GO:0000139]; integral component of membrane [GO:0016021]; nucleoplasm [GO:0005654]; negative regulation of pathway-restricted SMAD protein phosphorylation [GO:0060394]; negative regulation of SMAD protein complex assembly [GO:0010991]; negative regulation of transforming growth factor beta receptor si…	-	NO
21	2099477	TC	CT	82117.9	243	453	486	0.932099	424	29	WA_WD_W1	0:66,5:71,24:75	.:GG-WUR-108_GG-WUR-262_GG-WUR-068_GG-WUR-154_GG-WUR-042_GG-WUR-114_GG-WUR-121_GG-WUR-156_GG-WUR-059_GG-WUR-253_GG-WUR-116_GG-WUR-261_GG-WUR-257_GG-WUR-113_GG-WUR-120_GG-WUR-117_GG-WUR-159_GG-WUR-258_GG-WUR-036_GG-WUR-162_GG-WUR-256_GG-WUR-239_GG-WUR-051_GG-WUR-092_GG-WUR-163_GG-WUR-069_GG-WUR-115_GG-WUR-130_GG-WUR-238_GG-WUR-123_GG-WUR-055_GG-WUR-263_GG-WUR-175_GG-WUR-050_GG-WUR-153_GG-WUR-118_G…	1168	4|0|0	missense_variant	MODERATE	-	ENSGALG00000001483	ENSGALT00000002248	2/6	-	401-402	221-222	74	L/P	cTC/cCT	-	tolerated_low_confidence(0.05)	-2.769	-	-	-	YES
21	2338639	G	C	155006	230	460	460	1	460	0	WA_WD_W1	0:59,0:75,0:96	.:GG-WUR-108_GG-WUR-068_GG-WUR-154_GG-WUR-042_GG-WUR-114_GG-WUR-121_GG-WUR-156_GG-WUR-059_GG-WUR-253_GG-WUR-116_GG-WUR-113_GG-WUR-120_GG-WUR-117_GG-WUR-159_GG-WUR-258_GG-WUR-036_GG-WUR-162_GG-WUR-051_GG-WUR-092_GG-WUR-163_GG-WUR-069_GG-WUR-115_GG-WUR-130_GG-WUR-123_GG-WUR-055_GG-WUR-263_GG-WUR-175_GG-WUR-050_GG-WUR-153_GG-WUR-118_GG-WUR-111_GG-WUR-134_GG-WUR-119_GG-WUR-122_GG-WUR-088_GG-WUR-147_G…	242	62|3|0	missense_variant&splice_region_variant	MODERATE	CPSF3L	ENSGALG00000001691	ENSGALT00000061341	9/18	-	762	762	254	L/F	ttG/ttC	-	deleterious(0)	1	PTHR11203:SF37&PTHR11203&Pfam_domain:PF10996&SMART_domains:SM01027&Superfamily_domains:SSF56281	blood microparticle [GO:0072562]; integrator complex [GO:0032039]; snRNA processing [GO:0016180]	-	YES
21	2472312	A	G	97858.6	235	470	470	1	470	0	WA_WD_W1	0:66,0:74,0:95	.:GG-WUR-108_GG-WUR-262_GG-WUR-068_GG-WUR-154_GG-WUR-042_GG-WUR-114_GG-WUR-121_GG-WUR-156_GG-WUR-059_GG-WUR-253_GG-WUR-116_GG-WUR-261_GG-WUR-257_GG-WUR-113_GG-WUR-120_GG-WUR-117_GG-WUR-159_GG-WUR-258_GG-WUR-036_GG-WUR-162_GG-WUR-256_GG-WUR-239_GG-WUR-051_GG-WUR-092_GG-WUR-163_GG-WUR-069_GG-WUR-115_GG-WUR-130_GG-WUR-238_GG-WUR-236_GG-WUR-123_GG-WUR-055_GG-WUR-263_GG-WUR-175_GG-WUR-050_GG-WUR-118_G…	780	49|3|0	missense_variant	MODERATE	FAM132A	ENSGALG00000001857	ENSGALT00000002876	1/8	-	93	93	31	I/M	atA/atG	-	deleterious(0.02)	1.417	PTHR24019:SF12&PTHR24019	extracellular space [GO:0005615]; negative regulation of gluconeogenesis [GO:0045721]; negative regulation of inflammatory response [GO:0050728]; positive regulation of glucose import [GO:0046326]; positive regulation of insulin receptor signaling pathway [GO:0046628]; positive regulation of insulin secretion involved in cellular response to glucose stimulus [GO:0035774]; positive regulation of p…	-	YES
21	2844316	A	G	123747	243	486	486	1	486	0	WA_WD_W1	0:67,0:77,0:99	.:GG-WUR-108_GG-WUR-068_GG-WUR-154_GG-WUR-042_GG-WUR-114_GG-WUR-121_GG-WUR-156_GG-WUR-059_GG-WUR-253_GG-WUR-116_GG-WUR-257_GG-WUR-113_GG-WUR-120_GG-WUR-117_GG-WUR-159_GG-WUR-258_GG-WUR-036_GG-WUR-162_GG-WUR-256_GG-WUR-239_GG-WUR-051_GG-WUR-092_GG-WUR-163_GG-WUR-069_GG-WUR-115_GG-WUR-130_GG-WUR-238_GG-WUR-236_GG-WUR-123_GG-WUR-055_GG-WUR-263_GG-WUR-175_GG-WUR-050_GG-WUR-153_GG-WUR-118_GG-WUR-259_G…	1232	43|0|0	splice_acceptor_variant&non_coding_transcript_variant	HIGH	-	ENSGALG00000026875	ENSGALT00000043146	-	2/3	-	-	-	-	-	-	-	NA	-	-	-	YES
21	2878014	G	A	68757.8	204	401	408	0.982843	394	7	WA_WD_W1	0:53,7:56,0:88	.:GG-WUR-108_GG-WUR-154_GG-WUR-042_GG-WUR-114_GG-WUR-121_GG-WUR-156_GG-WUR-059_GG-WUR-116_GG-WUR-261_GG-WUR-117_GG-WUR-159_GG-WUR-258_GG-WUR-036_GG-WUR-162_GG-WUR-239_GG-WUR-051_GG-WUR-092_GG-WUR-163_GG-WUR-069_GG-WUR-115_GG-WUR-130_GG-WUR-238_GG-WUR-236_GG-WUR-123_GG-WUR-055_GG-WUR-263_GG-WUR-050_GG-WUR-153_GG-WUR-118_GG-WUR-111_GG-WUR-134_GG-WUR-119_GG-WUR-088_GG-WUR-147_GG-WUR-090_GG-WUR-096_G…	596	56|0|0	missense_variant	MODERATE	KLHL17	ENSGALG00000002199	ENSGALT00000003442	1/13	-	13	13	5	P/S	Ccc/Tcc	-	deleterious_low_confidence(0)	0.831	-	actin cytoskeleton [GO:0015629]; Cul3-RING ubiquitin ligase complex [GO:0031463]; dendrite cytoplasm [GO:0032839]; extracellular space [GO:0005615]; actin filament binding [GO:0051015]; actin cytoskeleton organization [GO:0030036]; brain development [GO:0007420]; protein ubiquitination [GO:0016567]	-	YES
21	4217243	A	G	174433	200	400	400	1	400	0	WA_WD_W1	0:49,0:69,0:82	.:GG-WUR-108_GG-WUR-068_GG-WUR-154_GG-WUR-042_GG-WUR-114_GG-WUR-156_GG-WUR-059_GG-WUR-116_GG-WUR-113_GG-WUR-120_GG-WUR-117_GG-WUR-159_GG-WUR-036_GG-WUR-162_GG-WUR-051_GG-WUR-092_GG-WUR-115_GG-WUR-130_GG-WUR-236_GG-WUR-123_GG-WUR-175_GG-WUR-050_GG-WUR-153_GG-WUR-118_GG-WUR-134_GG-WUR-119_GG-WUR-088_GG-WUR-147_GG-WUR-090_GG-WUR-096_GG-WUR-136_GG-WUR-240_GG-WUR-160_GG-WUR-135_GG-WUR-164_GG-WUR-039_G…	249	62|6|0	missense_variant	MODERATE	PLEKHM2	ENSGALG00000003439	ENSGALT00000064906	17/17	-	2870	2870	957	H/R	cAt/cGt	-	deleterious_low_confidence(0.05)	0.134	-	endosome membrane [GO:0010008]; Golgi organization [GO:0007030]; lysosome localization [GO:0032418]; positive regulation of membrane tubulation [GO:1903527]; regulation of protein localization [GO:0032880]	immune,growth/size/body,homeostasis,hematopoietic,mortality/aging	YES
21	4332063	C	T	108415	248	467	496	0.941532	444	23	WA_WD_W1	0:71,23:52,0:99	.:GG-WUR-108_GG-WUR-262_GG-WUR-068_GG-WUR-154_GG-WUR-042_GG-WUR-114_GG-WUR-121_GG-WUR-156_GG-WUR-059_GG-WUR-253_GG-WUR-116_GG-WUR-261_GG-WUR-257_GG-WUR-113_GG-WUR-120_GG-WUR-117_GG-WUR-159_GG-WUR-258_GG-WUR-036_GG-WUR-162_GG-WUR-256_GG-WUR-239_GG-WUR-051_GG-WUR-092_GG-WUR-163_GG-WUR-069_GG-WUR-115_GG-WUR-130_GG-WUR-238_GG-WUR-236_GG-WUR-123_GG-WUR-055_GG-WUR-263_GG-WUR-175_GG-WUR-050_GG-WUR-153_G…	598	47|13|0	missense_variant	MODERATE	FBXO42	ENSGALG00000003731	ENSGALT00000005919	10/10	-	1702	1702	568	A/T	Gca/Aca	-	deleterious_low_confidence(0)	0.352	PTHR23244:SF316&PTHR23244	-	-	YES
21	4548288	A	G	114297	247	480	494	0.97166	468	12	WA_WD_W1	12:58,0:78,0:98	GG-WUR-042_GG-WUR-257_GG-WUR-162_GG-WUR-123_GG-WUR-088_GG-WUR-147_GG-WUR-240_GG-WUR-135_GG-WUR-164_GG-WUR-052_GG-WUR-143_GG-WUR-112:GG-WUR-108_GG-WUR-262_GG-WUR-068_GG-WUR-154_GG-WUR-114_GG-WUR-121_GG-WUR-156_GG-WUR-059_GG-WUR-253_GG-WUR-116_GG-WUR-261_GG-WUR-113_GG-WUR-120_GG-WUR-117_GG-WUR-159_GG-WUR-258_GG-WUR-036_GG-WUR-256_GG-WUR-239_GG-WUR-051_GG-WUR-092_GG-WUR-163_GG-WUR-069_GG-WUR-115_GG-…	1488	59|9|0	missense_variant	MODERATE	ALDH4A1	ENSGALG00000042184	ENSGALT00000054755	8/11	-	799	770	257	L/S	tTg/tCg	-	deleterious(0)	-2.006	-	1-pyrroline-5-carboxylate dehydrogenase activity [GO:0003842]; oxidoreductase activity, acting on the aldehyde or oxo group of donors, NAD or NADP as acceptor [GO:0016620]; glutamate biosynthetic process [GO:0006537]; proline biosynthetic process [GO:0006561]oxidoreductase activity [GO:0016491]	-	YES
21	4925729	AGG	AG	135079	238	476	476	1	476	0	WA_WD_W1	0:65,0:77,0:96	.:GG-WUR-108_GG-WUR-262_GG-WUR-068_GG-WUR-154_GG-WUR-114_GG-WUR-121_GG-WUR-156_GG-WUR-059_GG-WUR-116_GG-WUR-261_GG-WUR-257_GG-WUR-113_GG-WUR-120_GG-WUR-117_GG-WUR-159_GG-WUR-258_GG-WUR-036_GG-WUR-162_GG-WUR-256_GG-WUR-051_GG-WUR-092_GG-WUR-163_GG-WUR-069_GG-WUR-115_GG-WUR-130_GG-WUR-238_GG-WUR-236_GG-WUR-055_GG-WUR-263_GG-WUR-175_GG-WUR-050_GG-WUR-153_GG-WUR-118_GG-WUR-259_GG-WUR-252_GG-WUR-111_G…	8130	40|31|26	splice_acceptor_variant&frameshift_variant	HIGH	CTRC	ENSGALG00000039406	ENSGALT00000073283	4/9	-	364-365	341-342	114	S/X	tCC/tC	-	-	NA	2.40.10.10&Pfam_domain:PF00089&PROSITE_profiles:PS50240&PTHR24250&PTHR24250:SF32&SMART_domains:SM00020&Superfamily_domains:SSF50494	serine-type endopeptidase activity [GO:0004252]	-	NO
21	6515711	AGA	AGGA	84579.3	198	396	396	1	396	0	WA_WD_W1	0:52,0:64,0:82	.:GG-WUR-108_GG-WUR-068_GG-WUR-154_GG-WUR-042_GG-WUR-114_GG-WUR-121_GG-WUR-156_GG-WUR-059_GG-WUR-116_GG-WUR-113_GG-WUR-120_GG-WUR-117_GG-WUR-159_GG-WUR-036_GG-WUR-239_GG-WUR-051_GG-WUR-092_GG-WUR-163_GG-WUR-069_GG-WUR-115_GG-WUR-130_GG-WUR-236_GG-WUR-055_GG-WUR-175_GG-WUR-050_GG-WUR-153_GG-WUR-118_GG-WUR-111_GG-WUR-134_GG-WUR-119_GG-WUR-122_GG-WUR-147_GG-WUR-090_GG-WUR-096_GG-WUR-136_GG-WUR-240_G…	943	48|8|2	frameshift_variant	HIGH	-	ENSGALG00000039532	ENSGALT00000065410	2/4	-	138-139	138-139	46-47	ES/EEX	gaGAgc/gaGGAgc	-	-	NA	PTHR12247&PTHR12247:SF86&Pfam_domain:PF16616	-	-	NO
21	6515835	CGG	CG	94361.9	195	369	390	0.946154	348	21	WA_WD_W1	7:47,8:55,6:72	GG-WUR-117_GG-WUR-055_GG-WUR-118_GG-WUR-096_GG-WUR-136_GG-WUR-129_GG-WUR-097:GG-WUR-108_GG-WUR-154_GG-WUR-042_GG-WUR-114_GG-WUR-121_GG-WUR-156_GG-WUR-059_GG-WUR-113_GG-WUR-120_GG-WUR-159_GG-WUR-258_GG-WUR-036_GG-WUR-051_GG-WUR-092_GG-WUR-163_GG-WUR-069_GG-WUR-115_GG-WUR-130_GG-WUR-238_GG-WUR-236_GG-WUR-123_GG-WUR-175_GG-WUR-050_GG-WUR-111_GG-WUR-134_GG-WUR-119_GG-WUR-122_GG-WUR-088_GG-WUR-147_GG-…	628	48|8|2	frameshift_variant	HIGH	-	ENSGALG00000039532	ENSGALT00000065410	2/4	-	262-263	262-263	88	G/X	GGg/Gg	-	-	NA	PTHR12247&PTHR12247:SF86&Pfam_domain:PF16616&1.10.150.50	-	-	NO
22	2362822	CCA	GGG	88167.4	242	470	484	0.971074	456	14	WA_WD_W1	1:67,6:69,7:92	GG-WUR-089:GG-WUR-108_GG-WUR-262_GG-WUR-068_GG-WUR-154_GG-WUR-042_GG-WUR-114_GG-WUR-121_GG-WUR-156_GG-WUR-059_GG-WUR-253_GG-WUR-116_GG-WUR-261_GG-WUR-257_GG-WUR-113_GG-WUR-120_GG-WUR-117_GG-WUR-159_GG-WUR-258_GG-WUR-036_GG-WUR-162_GG-WUR-256_GG-WUR-239_GG-WUR-051_GG-WUR-092_GG-WUR-163_GG-WUR-069_GG-WUR-115_GG-WUR-130_GG-WUR-238_GG-WUR-236_GG-WUR-123_GG-WUR-055_GG-WUR-263_GG-WUR-175_GG-WUR-050_GG-…	612	53|21|4	missense_variant	MODERATE	FGFR1	ENSGALG00000039786	ENSGALT00000066938	6/17	-	851-853	797-799	266-267	VV/AL	gTGGtg/gCCCtg	-	-	-2.929	PIRSF_domain:PIRSF000628&2.60.40.10&Pfam_domain:PF07679&SMART_domains:SM00409&SMART_domains:SM00408&Superfamily_domains:SSF48726&PROSITE_profiles:PS50835&PTHR24416:SF131&PTHR24416	integral component of membrane [GO:0016021]; ATP binding [GO:0005524]; fibroblast growth factor-activated receptor activity [GO:0005007]; positive regulation of cell proliferation [GO:0008284]	embryo,skeleton,craniofacial,endocrine/exocrine,homeostasis,cardiovascular,hearing/vestibular/ear,limbs/digits/tail,immune,neoplasm,mortality/aging,nervous system,growth/size/body,vision/eye,cellular,reproductive,renal/urinary,behavior,no abnormal phenotype observed,muscle,hematopoietic,digestive/alimentary	NO
22	2845615	G	C	63246.3	211	422	422	1	422	0	WA_WD_W1	0:63,0:61,0:87	.:GG-WUR-108_GG-WUR-262_GG-WUR-068_GG-WUR-154_GG-WUR-042_GG-WUR-114_GG-WUR-121_GG-WUR-156_GG-WUR-253_GG-WUR-116_GG-WUR-261_GG-WUR-257_GG-WUR-113_GG-WUR-120_GG-WUR-117_GG-WUR-159_GG-WUR-258_GG-WUR-036_GG-WUR-162_GG-WUR-256_GG-WUR-239_GG-WUR-051_GG-WUR-092_GG-WUR-163_GG-WUR-069_GG-WUR-115_GG-WUR-130_GG-WUR-238_GG-WUR-236_GG-WUR-123_GG-WUR-055_GG-WUR-263_GG-WUR-175_GG-WUR-050_GG-WUR-118_GG-WUR-259_G…	33525	56|2|14	missense_variant	MODERATE	ACTG2	ENSGALG00000041634	ENSGALT00000065171	2/9	-	177	87	29	R/S	agG/agC	-	deleterious_low_confidence(0.02)	-2.908	PTHR11937&PTHR11937:SF227&3.30.420.40&Pfam_domain:PF00022&SMART_domains:SM00268&Superfamily_domains:SSF53067&Prints_domain:PR00190	blood microparticle [GO:0072562]; cell periphery [GO:0071944]; cytoplasm [GO:0005737]; cytoskeleton [GO:0005856]; extracellular exosome [GO:0070062]; ATP binding [GO:0005524]	-	NO
23	2153904	T	C	129462	221	427	442	0.966063	414	13	WA_WD_W1	0:55,0:76,13:76	.:GG-WUR-108_GG-WUR-068_GG-WUR-154_GG-WUR-042_GG-WUR-114_GG-WUR-121_GG-WUR-156_GG-WUR-059_GG-WUR-116_GG-WUR-113_GG-WUR-120_GG-WUR-117_GG-WUR-159_GG-WUR-036_GG-WUR-162_GG-WUR-051_GG-WUR-092_GG-WUR-163_GG-WUR-069_GG-WUR-115_GG-WUR-130_GG-WUR-123_GG-WUR-055_GG-WUR-175_GG-WUR-050_GG-WUR-153_GG-WUR-118_GG-WUR-111_GG-WUR-134_GG-WUR-119_GG-WUR-122_GG-WUR-088_GG-WUR-147_GG-WUR-090_GG-WUR-096_GG-WUR-136_G…	434	64|7|0	missense_variant	MODERATE	RCC1	ENSGALG00000030097	ENSGALT00000073874	3/8	-	446	446	149	V/A	gTg/gCg	-	deleterious(0.03)	-2.699	2.130.10.30&Pfam_domain:PF00415&PROSITE_profiles:PS50012&PTHR22870&PTHR22870:SF179&Low_complexity_(Seg):seg&Superfamily_domains:SSF50985	-	immune,hematopoietic	YES
23	2256376	A	G	134637	211	422	422	1	422	0	WA_WD_W1	0:54,0:73,0:84	.:GG-WUR-108_GG-WUR-068_GG-WUR-154_GG-WUR-042_GG-WUR-114_GG-WUR-121_GG-WUR-156_GG-WUR-059_GG-WUR-116_GG-WUR-113_GG-WUR-120_GG-WUR-117_GG-WUR-159_GG-WUR-036_GG-WUR-162_GG-WUR-051_GG-WUR-092_GG-WUR-163_GG-WUR-069_GG-WUR-115_GG-WUR-130_GG-WUR-236_GG-WUR-123_GG-WUR-055_GG-WUR-175_GG-WUR-050_GG-WUR-153_GG-WUR-118_GG-WUR-111_GG-WUR-134_GG-WUR-119_GG-WUR-122_GG-WUR-088_GG-WUR-147_GG-WUR-090_GG-WUR-096_G…	310	14|8|0	missense_variant	MODERATE	-	ENSGALG00000029066	ENSGALT00000044183	15/15	-	2140	2140	714	S/G	Agc/Ggc	-	deleterious_low_confidence(0.02)	-0.627	-	integral component of membrane [GO:0016021]; oligosaccharide binding [GO:0070492]	-	YES
23	2297258	CG	CGTGACAAG	69094.4	219	421	438	0.961187	404	17	WA_WD_W1	5:55,6:63,6:84	GG-WUR-253_GG-WUR-051_GG-WUR-050_GG-WUR-134_GG-WUR-089:GG-WUR-108_GG-WUR-068_GG-WUR-154_GG-WUR-042_GG-WUR-114_GG-WUR-156_GG-WUR-059_GG-WUR-116_GG-WUR-113_GG-WUR-120_GG-WUR-117_GG-WUR-159_GG-WUR-036_GG-WUR-162_GG-WUR-239_GG-WUR-092_GG-WUR-163_GG-WUR-069_GG-WUR-115_GG-WUR-130_GG-WUR-238_GG-WUR-236_GG-WUR-123_GG-WUR-055_GG-WUR-175_GG-WUR-153_GG-WUR-118_GG-WUR-259_GG-WUR-111_GG-WUR-119_GG-WUR-122_GG-…	387	58|6|4	frameshift_variant&splice_region_variant	HIGH	MAN1C1	ENSGALG00000001038	ENSGALT00000070947	10/10	-	1036	1036	346	R/LVTX	Cgt/CTTGTCACgt	-	-	NA	Pfam_domain:PF01532&1.50.10.50&Superfamily_domains:SSF48225	endoplasmic reticulum [GO:0005783]; extracellular exosome [GO:0070062]; Golgi membrane [GO:0000139]; integral component of membrane [GO:0016021]; calcium ion binding [GO:0005509]; mannosyl-oligosaccharide 1,2-alpha-mannosidase activity [GO:0004571]; N-glycan processing [GO:0006491]	-	YES
23	3229207	T	C	140195	223	446	446	1	446	0	WA_WD_W1	0:58,0:76,0:89	.:GG-WUR-108_GG-WUR-068_GG-WUR-154_GG-WUR-042_GG-WUR-114_GG-WUR-121_GG-WUR-156_GG-WUR-059_GG-WUR-116_GG-WUR-113_GG-WUR-120_GG-WUR-117_GG-WUR-159_GG-WUR-036_GG-WUR-162_GG-WUR-239_GG-WUR-051_GG-WUR-092_GG-WUR-163_GG-WUR-069_GG-WUR-115_GG-WUR-130_GG-WUR-236_GG-WUR-123_GG-WUR-055_GG-WUR-175_GG-WUR-050_GG-WUR-153_GG-WUR-118_GG-WUR-111_GG-WUR-134_GG-WUR-119_GG-WUR-122_GG-WUR-088_GG-WUR-147_GG-WUR-090_G…	245	56|6|0	missense_variant	MODERATE	EXTL1	ENSGALG00000043829	ENSGALT00000053717	11/11	-	2298	2054	685	H/R	cAt/cGt	-	tolerated(0.12)	-4.455	Pfam_domain:PF09258&3.90.550.10&Superfamily_domains:SSF53448	endoplasmic reticulum [GO:0005783]; integral component of membrane [GO:0016021]; glucuronosyltransferase activity [GO:0015020]; glycosaminoglycan biosynthetic process [GO:0006024]; heparan sulfate proteoglycan biosynthetic process [GO:0015012]	-	YES
23	4070363	TG	TGCCGGCCCCG	52530.3	203	385	406	0.948276	364	21	WA_WD_W1	7:58,2:61,12:63	GG-WUR-120_GG-WUR-036_GG-WUR-163_GG-WUR-115_GG-WUR-130_GG-WUR-090_GG-WUR-136:GG-WUR-108_GG-WUR-262_GG-WUR-068_GG-WUR-154_GG-WUR-042_GG-WUR-114_GG-WUR-121_GG-WUR-156_GG-WUR-059_GG-WUR-253_GG-WUR-261_GG-WUR-113_GG-WUR-117_GG-WUR-159_GG-WUR-258_GG-WUR-256_GG-WUR-239_GG-WUR-051_GG-WUR-092_GG-WUR-069_GG-WUR-238_GG-WUR-236_GG-WUR-123_GG-WUR-055_GG-WUR-263_GG-WUR-175_GG-WUR-050_GG-WUR-153_GG-WUR-118_GG-…	528	44|20|0	inframe_insertion	MODERATE	EVA1B	ENSGALG00000022440	ENSGALT00000036018	2/2	-	158	158	53	C/CRPR	tGc/tGCCGGCCCCGc	-	-	1	PTHR12011:SF311&PTHR12011&Pfam_domain:PF14851	integral component of membrane [GO:0016021]	-	NO
23	4073329	A	C	94171	243	486	486	1	486	0	WA_WD_W1	0:70,0:74,0:99	.:GG-WUR-108_GG-WUR-262_GG-WUR-068_GG-WUR-154_GG-WUR-042_GG-WUR-114_GG-WUR-121_GG-WUR-156_GG-WUR-059_GG-WUR-253_GG-WUR-116_GG-WUR-261_GG-WUR-257_GG-WUR-113_GG-WUR-120_GG-WUR-117_GG-WUR-159_GG-WUR-036_GG-WUR-162_GG-WUR-256_GG-WUR-239_GG-WUR-051_GG-WUR-092_GG-WUR-163_GG-WUR-069_GG-WUR-115_GG-WUR-130_GG-WUR-238_GG-WUR-236_GG-WUR-123_GG-WUR-055_GG-WUR-263_GG-WUR-175_GG-WUR-050_GG-WUR-153_GG-WUR-118_G…	284	49|29|0	splice_donor_variant	HIGH	THRAP3	ENSGALG00000002144	ENSGALT00000070960	-	1/1	-	-	-	-	-	-	-	NA	-	RNA splicing [GO:0008380]exon-exon junction complex [GO:0035145]; extracellular exosome [GO:0070062]; mediator complex [GO:0016592]; nuclear speck [GO:0016607]; core promoter sequence-specific DNA binding [GO:0001046]; poly(A) RNA binding [GO:0044822]; receptor activity [GO:0004872]; RNA polymerase II transcription cofactor activity [GO:0001104]; transcription coactivator activity [GO:0003713]; a…	-	YES
23	4073409	T	C	96375.6	247	452	494	0.91498	416	36	WA_WD_W1	0:71,0:78,36:59	.:GG-WUR-108_GG-WUR-262_GG-WUR-068_GG-WUR-154_GG-WUR-042_GG-WUR-114_GG-WUR-121_GG-WUR-156_GG-WUR-059_GG-WUR-253_GG-WUR-116_GG-WUR-261_GG-WUR-257_GG-WUR-113_GG-WUR-120_GG-WUR-117_GG-WUR-159_GG-WUR-258_GG-WUR-036_GG-WUR-162_GG-WUR-256_GG-WUR-239_GG-WUR-051_GG-WUR-092_GG-WUR-163_GG-WUR-069_GG-WUR-115_GG-WUR-130_GG-WUR-238_GG-WUR-236_GG-WUR-123_GG-WUR-055_GG-WUR-263_GG-WUR-175_GG-WUR-050_GG-WUR-153_G…	621	49|29|0	missense_variant	MODERATE	THRAP3	ENSGALG00000002144	ENSGALT00000070960	1/2	-	113	113	38	H/R	cAt/cGt	-	deleterious_low_confidence(0.02)	0.788	-	RNA splicing [GO:0008380]exon-exon junction complex [GO:0035145]; extracellular exosome [GO:0070062]; mediator complex [GO:0016592]; nuclear speck [GO:0016607]; core promoter sequence-specific DNA binding [GO:0001046]; poly(A) RNA binding [GO:0044822]; receptor activity [GO:0004872]; RNA polymerase II transcription cofactor activity [GO:0001104]; transcription coactivator activity [GO:0003713]; a…	-	YES
23	4073424	T	C	107204	247	478	494	0.967611	462	16	WA_WD_W1	0:71,0:78,16:82	.:GG-WUR-108_GG-WUR-262_GG-WUR-068_GG-WUR-154_GG-WUR-042_GG-WUR-114_GG-WUR-121_GG-WUR-156_GG-WUR-059_GG-WUR-253_GG-WUR-116_GG-WUR-261_GG-WUR-257_GG-WUR-113_GG-WUR-120_GG-WUR-117_GG-WUR-159_GG-WUR-258_GG-WUR-036_GG-WUR-162_GG-WUR-256_GG-WUR-239_GG-WUR-051_GG-WUR-092_GG-WUR-163_GG-WUR-069_GG-WUR-115_GG-WUR-130_GG-WUR-238_GG-WUR-236_GG-WUR-123_GG-WUR-055_GG-WUR-263_GG-WUR-175_GG-WUR-050_GG-WUR-153_G…	648	49|29|0	missense_variant	MODERATE	THRAP3	ENSGALG00000002144	ENSGALT00000070960	1/2	-	98	98	33	E/G	gAa/gGa	-	deleterious_low_confidence(0.01)	-0.563	-	RNA splicing [GO:0008380]exon-exon junction complex [GO:0035145]; extracellular exosome [GO:0070062]; mediator complex [GO:0016592]; nuclear speck [GO:0016607]; core promoter sequence-specific DNA binding [GO:0001046]; poly(A) RNA binding [GO:0044822]; receptor activity [GO:0004872]; RNA polymerase II transcription cofactor activity [GO:0001104]; transcription coactivator activity [GO:0003713]; a…	-	YES
24	2589083	A	G	105866	243	485	486	0.997942	484	1	WA_WD_W1	0:68,0:74,1:100	.:GG-WUR-108_GG-WUR-262_GG-WUR-068_GG-WUR-154_GG-WUR-042_GG-WUR-114_GG-WUR-121_GG-WUR-156_GG-WUR-059_GG-WUR-253_GG-WUR-116_GG-WUR-261_GG-WUR-257_GG-WUR-113_GG-WUR-120_GG-WUR-117_GG-WUR-159_GG-WUR-036_GG-WUR-162_GG-WUR-256_GG-WUR-239_GG-WUR-051_GG-WUR-092_GG-WUR-163_GG-WUR-069_GG-WUR-115_GG-WUR-130_GG-WUR-238_GG-WUR-236_GG-WUR-123_GG-WUR-055_GG-WUR-263_GG-WUR-175_GG-WUR-050_GG-WUR-153_GG-WUR-259_G…	260	0|0|0	splice_acceptor_variant&non_coding_transcript_variant	HIGH	-	ENSGALG00000034242	ENSGALT00000060090	-	1/1	-	-	-	-	-	-	-	NA	-		-	YES
24	4267105	G	A	125532	236	447	472	0.947034	428	19	WA_WD_W1	0:64,19:55,0:95	.:GG-WUR-108_GG-WUR-262_GG-WUR-068_GG-WUR-154_GG-WUR-042_GG-WUR-114_GG-WUR-121_GG-WUR-156_GG-WUR-059_GG-WUR-116_GG-WUR-261_GG-WUR-113_GG-WUR-120_GG-WUR-117_GG-WUR-159_GG-WUR-036_GG-WUR-162_GG-WUR-256_GG-WUR-239_GG-WUR-051_GG-WUR-092_GG-WUR-163_GG-WUR-069_GG-WUR-115_GG-WUR-130_GG-WUR-238_GG-WUR-236_GG-WUR-123_GG-WUR-055_GG-WUR-263_GG-WUR-175_GG-WUR-050_GG-WUR-153_GG-WUR-118_GG-WUR-259_GG-WUR-252_G…	388	50|21|16	missense_variant	MODERATE	NLRX1	ENSGALG00000006795	ENSGALT00000010967	4/8	-	1903-03-02	1903-03-02	1901-01-20	T/M	aCg/aTg	-	deleterious(0.01)	-2.533	PTHR24106&PTHR24106:SF152	integral component of membrane [GO:0016021]; ATP binding [GO:0005524]; ATPase activity [GO:0016887]	immune,growth/size/body,homeostasis,hematopoietic	YES
24	4268629	C	T	114215	239	453	478	0.947699	434	19	WA_WD_W1	0:67,18:55,1:95	.:GG-WUR-108_GG-WUR-068_GG-WUR-154_GG-WUR-042_GG-WUR-114_GG-WUR-121_GG-WUR-156_GG-WUR-059_GG-WUR-116_GG-WUR-261_GG-WUR-257_GG-WUR-113_GG-WUR-120_GG-WUR-117_GG-WUR-159_GG-WUR-258_GG-WUR-036_GG-WUR-162_GG-WUR-256_GG-WUR-239_GG-WUR-051_GG-WUR-092_GG-WUR-163_GG-WUR-069_GG-WUR-115_GG-WUR-130_GG-WUR-238_GG-WUR-236_GG-WUR-123_GG-WUR-055_GG-WUR-263_GG-WUR-175_GG-WUR-050_GG-WUR-153_GG-WUR-118_GG-WUR-259_G…	205	50|21|16	missense_variant	MODERATE	NLRX1	ENSGALG00000006795	ENSGALT00000010967	2/8	-	173	173	58	R/Q	cGa/cAa	-	deleterious_low_confidence(0.02)	-1.152	-	integral component of membrane [GO:0016021]; ATP binding [GO:0005524]; ATPase activity [GO:0016887]	immune,growth/size/body,homeostasis,hematopoietic	YES
24	4316514	A	G	131373	247	494	494	1	494	0	WA_WD_W1	0:70,0:77,0:100	.:GG-WUR-108_GG-WUR-068_GG-WUR-154_GG-WUR-042_GG-WUR-114_GG-WUR-121_GG-WUR-156_GG-WUR-059_GG-WUR-253_GG-WUR-116_GG-WUR-261_GG-WUR-257_GG-WUR-113_GG-WUR-120_GG-WUR-117_GG-WUR-159_GG-WUR-258_GG-WUR-036_GG-WUR-162_GG-WUR-256_GG-WUR-239_GG-WUR-051_GG-WUR-092_GG-WUR-163_GG-WUR-069_GG-WUR-115_GG-WUR-130_GG-WUR-238_GG-WUR-236_GG-WUR-123_GG-WUR-055_GG-WUR-263_GG-WUR-175_GG-WUR-050_GG-WUR-153_GG-WUR-118_G…	166	50|0|0	splice_donor_variant	HIGH	POU2AF1	ENSGALG00000006809	ENSGALT00000075631	-	1/4	-	-	-	-	-	-	-	NA	-	transcription factor binding [GO:0008134]; positive regulation of DNA-templated transcription, initiation [GO:2000144]	immune,growth/size/body,hematopoietic,cellular	YES
24	5266674	T	C	149779	245	490	490	1	490	0	WA_WD_W1	0:70,0:78,0:97	.:GG-WUR-108_GG-WUR-262_GG-WUR-068_GG-WUR-154_GG-WUR-042_GG-WUR-114_GG-WUR-121_GG-WUR-156_GG-WUR-059_GG-WUR-253_GG-WUR-116_GG-WUR-261_GG-WUR-257_GG-WUR-113_GG-WUR-120_GG-WUR-117_GG-WUR-159_GG-WUR-258_GG-WUR-036_GG-WUR-162_GG-WUR-256_GG-WUR-239_GG-WUR-051_GG-WUR-092_GG-WUR-163_GG-WUR-069_GG-WUR-115_GG-WUR-130_GG-WUR-238_GG-WUR-236_GG-WUR-123_GG-WUR-055_GG-WUR-263_GG-WUR-175_GG-WUR-050_GG-WUR-153_G…	276	52|12|0	missense_variant	MODERATE	CEP164	ENSGALG00000007310	ENSGALT00000011831	11/30	-	1495	1495	499	C/R	Tgt/Cgt	-	tolerated(0.65)	-2.549	-	centriole [GO:0005814]; ciliary transition fiber [GO:0097539]; extracellular space [GO:0005615]; nucleoplasm [GO:0005654]; cilium assembly [GO:0060271]	mortality/aging	YES
25	1785518	C	A	76401.4	184	368	368	1	368	0	WA_WD_W1	0:51,0:53,0:80	.:GG-WUR-108_GG-WUR-068_GG-WUR-154_GG-WUR-042_GG-WUR-121_GG-WUR-156_GG-WUR-059_GG-WUR-116_GG-WUR-113_GG-WUR-120_GG-WUR-117_GG-WUR-159_GG-WUR-036_GG-WUR-239_GG-WUR-051_GG-WUR-163_GG-WUR-069_GG-WUR-115_GG-WUR-130_GG-WUR-238_GG-WUR-123_GG-WUR-055_GG-WUR-175_GG-WUR-050_GG-WUR-153_GG-WUR-111_GG-WUR-134_GG-WUR-119_GG-WUR-122_GG-WUR-147_GG-WUR-090_GG-WUR-096_GG-WUR-136_GG-WUR-240_GG-WUR-160_GG-WUR-135_G…	2979	52|22|4	missense_variant	MODERATE	KCNN3	ENSGALG00000030554	ENSGALT00000080135	11/12	-	1594	1267	423	G/W	Ggg/Tgg	-	deleterious(0.05)	1.647	PTHR28638&PTHR28638:SF1	integral component of membrane [GO:0016021]; transcription corepressor activity [GO:0003714]; cell differentiation [GO:0030154]; negative regulation of transcription, DNA-templated [GO:0045892]zinc ion binding [GO:0008270]zinc ion binding [GO:0008270]integral component of membrane [GO:0016021]; small conductance calcium-activated potassium channel activity [GO:0016286]integral component of membra…	mortality/aging,respiratory,nervous system,reproductive	YES
[truncated: 29 more rows]

## Sheet: TableS2
Table S2: DAVID gene set enrichment analysis for evolutionary intolerant fixed variation
Annotation Cluster 1	Enrichment Score: 2.5412213576164113
Category	Term	Count	%	PValue	Genes	List Total	Pop Hits	Pop Total	Fold Enrichment	Bonferroni	Benjamini	FDR
UP_KEYWORDS	Cilium biogenesis/degradation	10	3.25733	0.000329468	CEP97, CEP162, CEP89, GSN, STK36, NEK1, FAM179B, KIAA0586, CEP164, TCTN1	301	148	20581	4.61996	0.0932314	0.00973907	0.438701
[truncated: 117 more rows]

## Sheet: TableS3
Table S3: Evolutionary intolerant variants predicted to have severe impact on the protein (PROVEAN score <= -5)
[truncated: 41 more rows]

[truncated: 1 more sheets: TableS4]
