# Supplementary material for: A survey of functional genomic variation in domesticated chickens
Source: Genet Sel Evol. 2018 Apr 16;50:17. doi: 10.1186/s12711-018-0390-1 (PMC5902831; doi:10.1186/s12711-018-0390-1)
Supplement: Supplementary file 6 — Additional file 6: Table S1. High-frequency deleterious variation in the WA line. Table S2. High-frequency deleterious variation in the WD line. Table S3. High-frequency deleterious variation in the W1 line. [file 12711_2018_390_MOESM6_ESM.xlsx]

## Sheet: Description
CHROM	Chromsome
POS	Position
REF	Reference allele
ALT	Alternate allele
QUAL	Variant quality score
Number_of_samples	Number of animals with genotype call
Allele_count	Number of animals with allele
Allele_number	Number of times the allele was called
Allele_count_homozygote	Allele count homozygote
Allele_count_heterozygote	Allele count heterozygote
Breed	Breed
Allele_count_breed(WA_het:WA_hom,WD_het:WD_hom,W1_het:W1_hom)	Number of heterozygote and homozygote carrier animals in the different lines
tAllele_count_samples(WA_het:WA_hom,WD_het:WD_hom,W1_het:W1_hom)	Heterozygote and homozygote carrier animals in the different lines
RNA_seq_coverage(ensembl)	Ensembl RNA-seq coverage
Ensembl_Orthology(one2one|one2many|many2many)	Ensembl orthology
Consequence	Consequence of variant
IMPACT	Impact of the variant
SYMBOL	Gene symbol
Gene	Gene id (ensembl)
Transcript	Transcript id (ensembl)
EXON_NR	Exon number
INTRON_NR	Intron number
cDNA_position	Position in cDNA
CDS_position	Position in CDS
Protein_position	Position in protein
Amino_acids	Amino acid change
Codons	Codon change
Phenotype	Phenotype assigned to gene
SIFT	Sift score
Provean	Provean score
Domains	Protein domains
GO	Gene ontology annotations
Phenotype	MGI phenotype associations with gene
dbSNP	Variant annotated in dbSNP (YES/NO)

## Sheet: TableS1
Table S1: high frequency deleterious variation in WA line
CHROM	POS	REF	ALT	QUAL	Number_of_samples	Allele_count	Allele_number	Allele_count_homozygote	Allele_count_heterozygote	Breed	Allele_count_breed(WA_het:WA_hom,WD_het:WD_hom,W1_het:W1_hom)	tAllele_count_samples(WA_het:WA_hom,WD_het:WD_hom,W1_het:W1_hom)	RNA_seq_coverage(ensembl)	Ensembl_Orthology(one2one|one2many|many2many)	Consequence	IMPACT	SYMBOL	Gene	Transcript	EXON_NR	INTRON_NR	cDNA_position	CDS_position	Protein_position	Amino_acids	Codons	Phenotype	SIFT	Provean	Domains	GO	Phenotype	dbSNP
1	84557213	G	A	21962.6	243	118	486	106	12	WA	12:53,0:0,0:0	GG-WUR-121_GG-WUR-059_GG-WUR-117_GG-WUR-258_GG-WUR-051_GG-WUR-092_GG-WUR-111_GG-WUR-134_GG-WUR-136_GG-WUR-164_GG-WUR-255_GG-WUR-060:GG-WUR-108_GG-WUR-068_GG-WUR-154_GG-WUR-042_GG-WUR-114_GG-WUR-156_GG-WUR-253_GG-WUR-116_GG-WUR-261_GG-WUR-113_GG-WUR-120_GG-WUR-159_GG-WUR-036_GG-WUR-162_GG-WUR-256_GG-WUR-239_GG-WUR-163_GG-WUR-069_GG-WUR-130_GG-WUR-238_GG-WUR-123_GG-WUR-055_GG-WUR-263_GG-WUR-175_GG-…	2693	60|3|0	missense_variant	MODERATE	DCBLD2	ENSGALG00000015258	ENSGALT00000024624	5/14	-	628	535	179	V/I	Gtt/Att	-	deleterious(0.02)	-0.86	Pfam_domain:PF03815&1jbiA00&SMART_domains:SM00603&Superfamily_domains:0039469&PROSITE_profiles:PS50820	cell surface [GO:0009986]; integral component of plasma membrane [GO:0005887]; negative regulation of cell growth [GO:0030308]; wound healing [GO:0042060]	respiratory,vision/eye,skeleton,cellular,cardiovascular	YES
1	98053974	A	C	27531.8	242	132	484	132	0	WA	0:66,0:0,0:0	.:GG-WUR-108_GG-WUR-262_GG-WUR-068_GG-WUR-154_GG-WUR-042_GG-WUR-114_GG-WUR-121_GG-WUR-156_GG-WUR-059_GG-WUR-253_GG-WUR-116_GG-WUR-261_GG-WUR-257_GG-WUR-113_GG-WUR-120_GG-WUR-117_GG-WUR-159_GG-WUR-258_GG-WUR-036_GG-WUR-162_GG-WUR-239_GG-WUR-051_GG-WUR-092_GG-WUR-163_GG-WUR-069_GG-WUR-115_GG-WUR-130_GG-WUR-238_GG-WUR-236_GG-WUR-123_GG-WUR-055_GG-WUR-175_GG-WUR-050_GG-WUR-153_GG-WUR-118_GG-WUR-111_G…	1192	25|4|6	missense_variant	MODERATE	-	ENSGALG00000015675	ENSGALT00000025277	6/28	-	676	676	226	I/L	Atc/Ctc	-	deleterious(0.03)	-0.046	PROSITE_profiles:PS50929&PTHR24223:SF166&PTHR24223&2hydA01&Pfam_domain:PF00664&Superfamily_domains:SSF90123&Transmembrane_helices:TMhelix	integral component of membrane [GO:0016021]; ATP binding [GO:0005524]; ATPase activity, coupled to transmembrane movement of substances [GO:0042626]integral component of membrane [GO:0016021]; ATP binding [GO:0005524]; ATPase activity, coupled to transmembrane movement of substances [GO:0042626]integral component of membrane [GO:0016021]; ATP binding [GO:0005524]; ATPase activity, coupled to tran…	-	YES
1	168099707	G	A	20038.3	232	126	464	126	0	WA	0:63,0:0,0:0	.:GG-WUR-108_GG-WUR-262_GG-WUR-068_GG-WUR-154_GG-WUR-042_GG-WUR-114_GG-WUR-121_GG-WUR-156_GG-WUR-059_GG-WUR-253_GG-WUR-116_GG-WUR-113_GG-WUR-120_GG-WUR-117_GG-WUR-159_GG-WUR-036_GG-WUR-162_GG-WUR-256_GG-WUR-239_GG-WUR-051_GG-WUR-092_GG-WUR-163_GG-WUR-069_GG-WUR-115_GG-WUR-130_GG-WUR-238_GG-WUR-236_GG-WUR-123_GG-WUR-055_GG-WUR-175_GG-WUR-050_GG-WUR-153_GG-WUR-118_GG-WUR-111_GG-WUR-254_GG-WUR-134_G…	1401	53|1|0	missense_variant	MODERATE	RUBCNL	ENSGALG00000016988	ENSGALT00000027446	15/15	-	2276	2276	759	S/L	tCg/tTg	-	deleterious(0)	-3.112	-	-	-	YES
2	100224755	C	A	28067.3	244	112	488	88	24	WA	24:44,0:0,0:0	GG-WUR-068_GG-WUR-114_GG-WUR-113_GG-WUR-120_GG-WUR-117_GG-WUR-258_GG-WUR-256_GG-WUR-051_GG-WUR-092_GG-WUR-163_GG-WUR-115_GG-WUR-238_GG-WUR-236_GG-WUR-050_GG-WUR-090_GG-WUR-096_GG-WUR-136_GG-WUR-240_GG-WUR-097_GG-WUR-155_GG-WUR-089_GG-WUR-035_GG-WUR-112_GG-WUR-237:GG-WUR-108_GG-WUR-262_GG-WUR-154_GG-WUR-042_GG-WUR-121_GG-WUR-156_GG-WUR-059_GG-WUR-116_GG-WUR-261_GG-WUR-257_GG-WUR-159_GG-WUR-036_GG-…	813	46|12|2	missense_variant	MODERATE	TMEM200C	ENSGALG00000030210	ENSGALT00000047689	1/1	-	401	401	134	P/H	cCt/cAt	-	deleterious(0.04)	-0.987	Low_complexity_(Seg):seg&Pfam_domain:PF10177	integral component of membrane [GO:0016021]	-	YES
2	115594830	G	A	31622	240	132	480	132	0	WA	0:66,0:0,0:0	.:GG-WUR-108_GG-WUR-262_GG-WUR-068_GG-WUR-154_GG-WUR-042_GG-WUR-114_GG-WUR-121_GG-WUR-156_GG-WUR-059_GG-WUR-116_GG-WUR-261_GG-WUR-113_GG-WUR-120_GG-WUR-117_GG-WUR-159_GG-WUR-258_GG-WUR-036_GG-WUR-256_GG-WUR-239_GG-WUR-051_GG-WUR-092_GG-WUR-163_GG-WUR-069_GG-WUR-130_GG-WUR-238_GG-WUR-236_GG-WUR-123_GG-WUR-055_GG-WUR-263_GG-WUR-175_GG-WUR-050_GG-WUR-153_GG-WUR-118_GG-WUR-259_GG-WUR-252_GG-WUR-111_G…	3557	65|2|0	missense_variant	MODERATE	VCPIP1	ENSGALG00000042883	ENSGALT00000080574	1/3	-	2462	2239	747	R/C	Cgt/Tgt	-	deleterious(0.03)	-1.124	PTHR14843&PTHR14843:SF2	-	-	YES
2	115684742	C	T	30240	246	142	492	142	0	WA	0:71,0:0,0:0	.:GG-WUR-108_GG-WUR-262_GG-WUR-068_GG-WUR-154_GG-WUR-042_GG-WUR-114_GG-WUR-121_GG-WUR-156_GG-WUR-059_GG-WUR-253_GG-WUR-116_GG-WUR-261_GG-WUR-257_GG-WUR-113_GG-WUR-120_GG-WUR-117_GG-WUR-159_GG-WUR-258_GG-WUR-036_GG-WUR-162_GG-WUR-256_GG-WUR-239_GG-WUR-051_GG-WUR-092_GG-WUR-163_GG-WUR-069_GG-WUR-115_GG-WUR-130_GG-WUR-238_GG-WUR-236_GG-WUR-123_GG-WUR-055_GG-WUR-263_GG-WUR-175_GG-WUR-050_GG-WUR-153_G…	627	0|0|0	splice_donor_variant&non_coding_transcript_variant	HIGH	-	ENSGALG00000040401	ENSGALT00000049454	-	2/3	-	-	-	-	-	-	-	NA	-		-	YES
3	15949835	G	A	19305.8	243	101	486	78	23	WA	23:39,0:0,0:0	GG-WUR-042_GG-WUR-036_GG-WUR-162_GG-WUR-256_GG-WUR-130_GG-WUR-236_GG-WUR-123_GG-WUR-055_GG-WUR-175_GG-WUR-153_GG-WUR-118_GG-WUR-252_GG-WUR-119_GG-WUR-088_GG-WUR-090_GG-WUR-240_GG-WUR-039_GG-WUR-251_GG-WUR-097_GG-WUR-094_GG-WUR-053_GG-WUR-035_GG-WUR-237:GG-WUR-068_GG-WUR-154_GG-WUR-114_GG-WUR-156_GG-WUR-116_GG-WUR-261_GG-WUR-257_GG-WUR-113_GG-WUR-120_GG-WUR-117_GG-WUR-159_GG-WUR-239_GG-WUR-051_GG-…	747	54|8|0	missense_variant	MODERATE	TTBK1	ENSGALG00000008627	ENSGALT00000014055	11/16	-	1232	1232	411	R/Q	cGg/cAg	-	deleterious(0.01)	-2.626	PTHR11909&PTHR11909:SF130	cytoplasm [GO:0005737]; nucleus [GO:0005634]; ATP binding [GO:0005524]; protein serine/threonine kinase activity [GO:0004674]; peptidyl-serine phosphorylation [GO:0018105]; regulation of cell shape [GO:0008360]; substantia nigra development [GO:0021762]	embryo,growth/size/body,limbs/digits/tail,cellular,mortality/aging,nervous system,cardiovascular	YES
3	25139640	G	A	18068	245	108	490	82	26	WA	26:41,0:0,0:0	GG-WUR-108_GG-WUR-156_GG-WUR-059_GG-WUR-253_GG-WUR-261_GG-WUR-159_GG-WUR-092_GG-WUR-069_GG-WUR-236_GG-WUR-055_GG-WUR-175_GG-WUR-153_GG-WUR-118_GG-WUR-259_GG-WUR-252_GG-WUR-119_GG-WUR-122_GG-WUR-147_GG-WUR-090_GG-WUR-136_GG-WUR-240_GG-WUR-160_GG-WUR-135_GG-WUR-054_GG-WUR-097_GG-WUR-112:GG-WUR-262_GG-WUR-068_GG-WUR-154_GG-WUR-042_GG-WUR-114_GG-WUR-121_GG-WUR-116_GG-WUR-257_GG-WUR-113_GG-WUR-117_GG-…	1193	59|7|0	missense_variant	MODERATE	THADA	ENSGALG00000009932	ENSGALT00000016147	27/36	-	4066	4066	1356	R/C	Cgt/Tgt	-	deleterious(0)	1	PTHR14387:SF2&PTHR14387&Superfamily_domains:SSF48371	-	-	YES
3	25402398	C	T	24599.6	237	128	474	128	0	WA	0:64,0:0,0:0	.:GG-WUR-108_GG-WUR-262_GG-WUR-068_GG-WUR-154_GG-WUR-042_GG-WUR-114_GG-WUR-121_GG-WUR-156_GG-WUR-059_GG-WUR-116_GG-WUR-261_GG-WUR-257_GG-WUR-113_GG-WUR-120_GG-WUR-117_GG-WUR-159_GG-WUR-258_GG-WUR-036_GG-WUR-162_GG-WUR-239_GG-WUR-051_GG-WUR-092_GG-WUR-163_GG-WUR-069_GG-WUR-115_GG-WUR-130_GG-WUR-123_GG-WUR-055_GG-WUR-175_GG-WUR-050_GG-WUR-153_GG-WUR-118_GG-WUR-259_GG-WUR-111_GG-WUR-254_GG-WUR-134_G…	2212	63|6|0	missense_variant	MODERATE	LRPPRC	ENSGALG00000009967	ENSGALT00000016201	2/38	-	137	137	46	R/H	cGt/cAt	-	deleterious(0.04)	1	PTHR24015&PTHR24015:SF187	condensed nuclear chromosome [GO:0000794]; intracellular ribonucleoprotein complex [GO:0030529]; membrane [GO:0016020]; microtubule [GO:0005874]; mitochondrial nucleoid [GO:0042645]; mitochondrion [GO:0005739]; nucleus [GO:0005634]; perinuclear region of cytoplasm [GO:0048471]; endonuclease activity [GO:0004519]; poly(A) RNA binding [GO:0044822]; RNA binding [GO:0003723]; single-stranded DNA bind…	embryo,growth/size/body,cellular,mortality/aging,hematopoietic,cardiovascular	YES
3	38116644	ACAGC	ACAGCAGC	22813.2	241	124	482	120	4	WA	4:60,0:0,0:0	GG-WUR-059_GG-WUR-259_GG-WUR-097_GG-WUR-035:GG-WUR-108_GG-WUR-262_GG-WUR-068_GG-WUR-154_GG-WUR-042_GG-WUR-114_GG-WUR-121_GG-WUR-156_GG-WUR-253_GG-WUR-116_GG-WUR-261_GG-WUR-113_GG-WUR-120_GG-WUR-159_GG-WUR-036_GG-WUR-162_GG-WUR-256_GG-WUR-239_GG-WUR-051_GG-WUR-092_GG-WUR-163_GG-WUR-069_GG-WUR-115_GG-WUR-130_GG-WUR-238_GG-WUR-236_GG-WUR-123_GG-WUR-055_GG-WUR-263_GG-WUR-175_GG-WUR-050_GG-WUR-153_GG-…	1842	64|7|0	inframe_insertion	MODERATE	LYST	ENSGALG00000032840	ENSGALT00000058745	22/52	-	6720-6723	6628-6631	2210-2211	QL/QQL	CAGCtg/CAGCAGCtg	-	-	3.242	PTHR13743&PTHR13743:SF86	lysosome organization [GO:0007040]lysosome organization [GO:0007040]	nervous system,cellular,hearing/vestibular/ear,respiratory,craniofacial,limbs/digits/tail,immune,renal/urinary,neoplasm,vision/eye,homeostasis,behavior,integument,pigmentation,growth/size/body,hematopoietic	NO
3	105509594	G	A	25094.4	247	130	494	120	10	WA	10:60,0:0,0:0	GG-WUR-042_GG-WUR-159_GG-WUR-069_GG-WUR-153_GG-WUR-096_GG-WUR-129_GG-WUR-053_GG-WUR-060_GG-WUR-052_GG-WUR-112:GG-WUR-108_GG-WUR-262_GG-WUR-068_GG-WUR-154_GG-WUR-114_GG-WUR-121_GG-WUR-156_GG-WUR-059_GG-WUR-253_GG-WUR-116_GG-WUR-261_GG-WUR-257_GG-WUR-113_GG-WUR-120_GG-WUR-117_GG-WUR-258_GG-WUR-036_GG-WUR-162_GG-WUR-256_GG-WUR-239_GG-WUR-051_GG-WUR-092_GG-WUR-115_GG-WUR-130_GG-WUR-238_GG-WUR-236_GG-…	242	49|23|0	missense_variant	MODERATE	PTK2B	ENSGALG00000016564	ENSGALT00000080037	25/25	-	2526	2491	831	E/K	Gag/Aag	-	deleterious_low_confidence(0.04)	0.201	-	cytoskeleton [GO:0005856]; extrinsic component of cytoplasmic side of plasma membrane [GO:0031234]; ATP binding [GO:0005524]; non-membrane spanning protein tyrosine kinase activity [GO:0004715]; signal transducer activity [GO:0004871]; regulation of actin cytoskeleton reorganization [GO:2000249]; regulation of angiogenesis [GO:0045765]; regulation of bone mineralization [GO:0030500]; regulation o…	immune,homeostasis,cellular,muscle,hematopoietic,cardiovascular	YES
3	106139827	CG	CA	30515.8	233	114	466	102	12	WA	12:51,0:0,0:0	GG-WUR-108_GG-WUR-154_GG-WUR-261_GG-WUR-117_GG-WUR-239_GG-WUR-163_GG-WUR-115_GG-WUR-134_GG-WUR-135_GG-WUR-039_GG-WUR-060_GG-WUR-237:GG-WUR-068_GG-WUR-042_GG-WUR-114_GG-WUR-121_GG-WUR-156_GG-WUR-059_GG-WUR-116_GG-WUR-257_GG-WUR-113_GG-WUR-120_GG-WUR-159_GG-WUR-258_GG-WUR-036_GG-WUR-162_GG-WUR-256_GG-WUR-051_GG-WUR-092_GG-WUR-069_GG-WUR-130_GG-WUR-238_GG-WUR-236_GG-WUR-123_GG-WUR-055_GG-WUR-175_GG-…	773	46|20|0	missense_variant	MODERATE	PNOC	ENSGALG00000016620	ENSGALT00000026828	1/2	-	114-115	100-101	34	R/W	CGg/TGg	-	deleterious(0.01)	-3.227	Pfam_domain:PF01160&PTHR11438&PTHR11438:SF2	axon terminus [GO:0043679]; dendrite [GO:0030425]; extracellular region [GO:0005576]; neuronal cell body [GO:0043025]; plasma membrane [GO:0005886]; neuropeptide hormone activity [GO:0005184]; opioid receptor binding [GO:0031628]; chemical synaptic transmission [GO:0007268]; neuropeptide signaling pathway [GO:0007218]; sensory perception [GO:0007600]	integument,behavior	NO
5	44960790	A	T	21488.2	240	103	480	80	23	WA	23:40,0:0,0:0	GG-WUR-108_GG-WUR-154_GG-WUR-121_GG-WUR-156_GG-WUR-059_GG-WUR-261_GG-WUR-159_GG-WUR-092_GG-WUR-069_GG-WUR-130_GG-WUR-123_GG-WUR-055_GG-WUR-263_GG-WUR-153_GG-WUR-118_GG-WUR-122_GG-WUR-147_GG-WUR-160_GG-WUR-135_GG-WUR-129_GG-WUR-097_GG-WUR-060_GG-WUR-237:GG-WUR-068_GG-WUR-042_GG-WUR-114_GG-WUR-116_GG-WUR-113_GG-WUR-120_GG-WUR-117_GG-WUR-258_GG-WUR-036_GG-WUR-256_GG-WUR-051_GG-WUR-115_GG-WUR-238_GG-…	7839	56|2|0	missense_variant	MODERATE	CHGA	ENSGALG00000010820	ENSGALT00000017591	6/8	-	843	710	237	Q/L	cAg/cTg	-	deleterious(0.01)	-2.467	Pfam_domain:PF01271&PTHR10583&PTHR10583:SF1	mast cell granule [GO:0042629]; perinuclear region of cytoplasm [GO:0048471]; secretory granule [GO:0030141]; defense response to Gram-negative bacterium [GO:0050829]; defense response to Gram-positive bacterium [GO:0050830]; mast cell chemotaxis [GO:0002551]; mast cell cytokine production [GO:0032762]; mast cell degranulation [GO:0043303]; negative regulation of catecholamine secretion [GO:00336…	growth/size/body,endocrine/exocrine,renal/urinary,mortality/aging,homeostasis,cardiovascular	YES
5	55090339	T	A	20847.9	246	106	492	80	26	WA	26:40,0:0,0:0	GG-WUR-108_GG-WUR-154_GG-WUR-114_GG-WUR-156_GG-WUR-253_GG-WUR-120_GG-WUR-258_GG-WUR-256_GG-WUR-092_GG-WUR-115_GG-WUR-175_GG-WUR-118_GG-WUR-252_GG-WUR-111_GG-WUR-254_GG-WUR-134_GG-WUR-122_GG-WUR-088_GG-WUR-147_GG-WUR-160_GG-WUR-164_GG-WUR-054_GG-WUR-255_GG-WUR-053_GG-WUR-155_GG-WUR-060:GG-WUR-262_GG-WUR-068_GG-WUR-042_GG-WUR-121_GG-WUR-059_GG-WUR-116_GG-WUR-261_GG-WUR-257_GG-WUR-113_GG-WUR-117_GG-…	559	15|3|0	missense_variant	MODERATE	-	ENSGALG00000012021	ENSGALT00000037347	5/5	-	949	842	281	V/D	gTt/gAt	-	deleterious_low_confidence(0.01)	-0.321	-	integral component of membrane [GO:0016021]integral component of plasma membrane [GO:0005887]; potassium ion leak channel activity [GO:0022841]; potassium ion transmembrane transport [GO:0071805]; stabilization of membrane potential [GO:0030322]	-	YES
5	55700873	G	T	29861	244	138	488	138	0	WA	0:69,0:0,0:0	.:GG-WUR-108_GG-WUR-262_GG-WUR-068_GG-WUR-154_GG-WUR-042_GG-WUR-114_GG-WUR-121_GG-WUR-156_GG-WUR-059_GG-WUR-253_GG-WUR-116_GG-WUR-261_GG-WUR-113_GG-WUR-120_GG-WUR-117_GG-WUR-159_GG-WUR-258_GG-WUR-036_GG-WUR-162_GG-WUR-256_GG-WUR-239_GG-WUR-051_GG-WUR-092_GG-WUR-163_GG-WUR-069_GG-WUR-115_GG-WUR-130_GG-WUR-238_GG-WUR-236_GG-WUR-123_GG-WUR-055_GG-WUR-263_GG-WUR-175_GG-WUR-050_GG-WUR-153_GG-WUR-118_G…	1206	62|4|0	missense_variant	MODERATE	AP5M1	ENSGALG00000012101	ENSGALT00000019765	5/8	-	1182	1144	382	L/I	Ctc/Atc	-	deleterious(0.01)	-1.361	PROSITE_profiles:PS51072&PTHR16082&PTHR16082:SF2&Pfam_domain:PF00928&2.60.40.1170&Superfamily_domains:0038852	AP-type membrane coat adaptor complex [GO:0030119]; cytosol [GO:0005829]; late endosome [GO:0005770]; lysosome [GO:0005764]; endosomal transport [GO:0016197]	-	YES
6	27618537	A	G	22301.7	241	111	482	92	19	WA	19:46,0:0,0:0	GG-WUR-156_GG-WUR-113_GG-WUR-120_GG-WUR-036_GG-WUR-239_GG-WUR-051_GG-WUR-092_GG-WUR-163_GG-WUR-263_GG-WUR-175_GG-WUR-118_GG-WUR-122_GG-WUR-147_GG-WUR-090_GG-WUR-135_GG-WUR-039_GG-WUR-260_GG-WUR-112_GG-WUR-237:GG-WUR-108_GG-WUR-068_GG-WUR-154_GG-WUR-042_GG-WUR-114_GG-WUR-121_GG-WUR-253_GG-WUR-116_GG-WUR-257_GG-WUR-117_GG-WUR-159_GG-WUR-258_GG-WUR-162_GG-WUR-256_GG-WUR-069_GG-WUR-115_GG-WUR-130_GG-…	2375	64|5|0	missense_variant	MODERATE	NHLRC2	ENSGALG00000008946	ENSGALT00000014546	10/12	-	1755	1621	541	M/V	Atg/Gtg	-	deleterious(0.01)	-0.642	PTHR13833:SF49&PTHR13833&2.120.10.30&Pfam_domain:PF01436&Superfamily_domains:SSF101898	cell [GO:0005623]; cell redox homeostasis [GO:0045454]	mortality/aging	YES
7	9728765	G	A	27284.7	248	140	496	140	0	WA	0:70,0:0,0:0	.:GG-WUR-108_GG-WUR-262_GG-WUR-068_GG-WUR-154_GG-WUR-042_GG-WUR-114_GG-WUR-121_GG-WUR-156_GG-WUR-059_GG-WUR-253_GG-WUR-116_GG-WUR-261_GG-WUR-257_GG-WUR-113_GG-WUR-120_GG-WUR-117_GG-WUR-159_GG-WUR-036_GG-WUR-162_GG-WUR-256_GG-WUR-239_GG-WUR-051_GG-WUR-092_GG-WUR-163_GG-WUR-069_GG-WUR-115_GG-WUR-130_GG-WUR-238_GG-WUR-236_GG-WUR-123_GG-WUR-055_GG-WUR-263_GG-WUR-175_GG-WUR-050_GG-WUR-153_GG-WUR-118_G…	841	49|4|0	missense_variant	MODERATE	DNAH7	ENSGALG00000007841	ENSGALT00000012727	37/62	-	6340	6340	2114	R/C	Cgt/Tgt	-	deleterious(0.02)	-1.106	PTHR10676&PTHR10676:SF138&Pfam_domain:PF12775&Superfamily_domains:SSF52540	cytoplasm [GO:0005737]; inner dynein arm [GO:0036156]; ATPase activity [GO:0016887]; calcium ion binding [GO:0005509]; microtubule motor activity [GO:0003777]; cilium movement [GO:0003341]; inner dynein arm assembly [GO:0036159]	-	YES
7	25447167	G	A	22936.3	240	137	480	136	1	WA	1:68,0:0,0:0	GG-WUR-039:GG-WUR-108_GG-WUR-262_GG-WUR-068_GG-WUR-154_GG-WUR-042_GG-WUR-114_GG-WUR-121_GG-WUR-156_GG-WUR-059_GG-WUR-253_GG-WUR-116_GG-WUR-261_GG-WUR-257_GG-WUR-113_GG-WUR-120_GG-WUR-117_GG-WUR-159_GG-WUR-258_GG-WUR-036_GG-WUR-162_GG-WUR-256_GG-WUR-239_GG-WUR-051_GG-WUR-092_GG-WUR-163_GG-WUR-069_GG-WUR-115_GG-WUR-130_GG-WUR-238_GG-WUR-236_GG-WUR-123_GG-WUR-055_GG-WUR-263_GG-WUR-175_GG-WUR-050_GG-…	436	50|0|0	missense_variant	MODERATE	TMEM177	ENSGALG00000011593	ENSGALT00000018926	3/3	-	910	611	204	R/H	cGc/cAc	-	deleterious(0.01)	1	PTHR21824:SF4&PTHR21824&Transmembrane_helices:TMhelix	integral component of membrane [GO:0016021]	-	YES
8	2623627	T	A	15313.9	236	98	472	74	24	WA	24:37,0:0,0:0	GG-WUR-262_GG-WUR-042_GG-WUR-114_GG-WUR-117_GG-WUR-159_GG-WUR-258_GG-WUR-162_GG-WUR-069_GG-WUR-238_GG-WUR-236_GG-WUR-123_GG-WUR-175_GG-WUR-134_GG-WUR-122_GG-WUR-147_GG-WUR-136_GG-WUR-240_GG-WUR-164_GG-WUR-039_GG-WUR-054_GG-WUR-260_GG-WUR-129_GG-WUR-053_GG-WUR-089:GG-WUR-068_GG-WUR-154_GG-WUR-121_GG-WUR-156_GG-WUR-059_GG-WUR-253_GG-WUR-116_GG-WUR-257_GG-WUR-113_GG-WUR-036_GG-WUR-239_GG-WUR-051_GG-…	730	61|5|0	missense_variant	MODERATE	ASPM	ENSGALG00000032398	ENSGALT00000062608	9/25	-	2627	2627	1902-05-25	F/Y	tTc/tAc	-	-	-2.68	Superfamily_domains:SSF47576	integral component of membrane [GO:0016021]; spindle organization [GO:0007051]	reproductive,growth/size/body,endocrine/exocrine,homeostasis,cellular,nervous system,hematopoietic	YES
8	2630366	A	T	21036	248	111	496	88	23	WA	23:44,0:0,0:0	GG-WUR-262_GG-WUR-042_GG-WUR-114_GG-WUR-117_GG-WUR-159_GG-WUR-258_GG-WUR-162_GG-WUR-069_GG-WUR-238_GG-WUR-236_GG-WUR-123_GG-WUR-175_GG-WUR-122_GG-WUR-147_GG-WUR-136_GG-WUR-240_GG-WUR-164_GG-WUR-039_GG-WUR-054_GG-WUR-260_GG-WUR-129_GG-WUR-053_GG-WUR-089:GG-WUR-068_GG-WUR-154_GG-WUR-121_GG-WUR-156_GG-WUR-059_GG-WUR-253_GG-WUR-116_GG-WUR-257_GG-WUR-113_GG-WUR-036_GG-WUR-256_GG-WUR-239_GG-WUR-051_GG-…	879	61|5|0	missense_variant	MODERATE	ASPM	ENSGALG00000032398	ENSGALT00000062608	18/25	-	4611	4611	1537	R/S	agA/agT	-	-	-4.098	SMART_domains:SM00015&Superfamily_domains:SSF52540	integral component of membrane [GO:0016021]; spindle organization [GO:0007051]	reproductive,growth/size/body,endocrine/exocrine,homeostasis,cellular,nervous system,hematopoietic	YES
8	2633224	G	A	23456.7	249	111	498	88	23	WA	23:44,0:0,0:0	GG-WUR-262_GG-WUR-042_GG-WUR-114_GG-WUR-117_GG-WUR-159_GG-WUR-258_GG-WUR-162_GG-WUR-069_GG-WUR-238_GG-WUR-236_GG-WUR-123_GG-WUR-175_GG-WUR-122_GG-WUR-147_GG-WUR-136_GG-WUR-240_GG-WUR-164_GG-WUR-039_GG-WUR-054_GG-WUR-260_GG-WUR-129_GG-WUR-053_GG-WUR-089:GG-WUR-068_GG-WUR-154_GG-WUR-121_GG-WUR-156_GG-WUR-059_GG-WUR-253_GG-WUR-116_GG-WUR-257_GG-WUR-113_GG-WUR-036_GG-WUR-256_GG-WUR-239_GG-WUR-051_GG-…	904	61|5|0	missense_variant	MODERATE	ASPM	ENSGALG00000032398	ENSGALT00000062608	18/25	-	7469	7469	2490	R/H	cGt/cAt	-	-	-2.813	PROSITE_profiles:PS50096&SMART_domains:SM00015&Superfamily_domains:SSF52540	integral component of membrane [GO:0016021]; spindle organization [GO:0007051]	reproductive,growth/size/body,endocrine/exocrine,homeostasis,cellular,nervous system,hematopoietic	NO
8	25920219	CAT	CT	19243.2	239	96	478	68	28	WA	28:34,0:0,0:0	GG-WUR-108_GG-WUR-121_GG-WUR-261_GG-WUR-113_GG-WUR-159_GG-WUR-162_GG-WUR-256_GG-WUR-239_GG-WUR-130_GG-WUR-238_GG-WUR-123_GG-WUR-055_GG-WUR-153_GG-WUR-259_GG-WUR-134_GG-WUR-119_GG-WUR-147_GG-WUR-090_GG-WUR-136_GG-WUR-039_GG-WUR-129_GG-WUR-094_GG-WUR-155_GG-WUR-060_GG-WUR-056_GG-WUR-052_GG-WUR-143_GG-WUR-035:GG-WUR-068_GG-WUR-154_GG-WUR-042_GG-WUR-114_GG-WUR-059_GG-WUR-116_GG-WUR-257_GG-WUR-117_GG-…	403	59|0|15	frameshift_variant&splice_region_variant	HIGH	C8B	ENSGALG00000010853	ENSGALT00000048276	2/13	-	89-90	89-90	30	D/X	gAT/gA	-	-	NA	-	extracellular exosome [GO:0070062]; membrane attack complex [GO:0005579]; immune response [GO:0006955]	hematopoietic	NO
10	17673569	G	A	34968.7	248	142	496	142	0	WA	0:71,0:0,0:0	.:GG-WUR-108_GG-WUR-262_GG-WUR-068_GG-WUR-154_GG-WUR-042_GG-WUR-114_GG-WUR-121_GG-WUR-156_GG-WUR-059_GG-WUR-253_GG-WUR-116_GG-WUR-261_GG-WUR-257_GG-WUR-113_GG-WUR-120_GG-WUR-117_GG-WUR-159_GG-WUR-258_GG-WUR-036_GG-WUR-162_GG-WUR-256_GG-WUR-239_GG-WUR-051_GG-WUR-092_GG-WUR-163_GG-WUR-069_GG-WUR-115_GG-WUR-130_GG-WUR-238_GG-WUR-236_GG-WUR-123_GG-WUR-055_GG-WUR-263_GG-WUR-175_GG-WUR-050_GG-WUR-153_G…	262	57|4|0	missense_variant	MODERATE	PCSK6	ENSGALG00000030076	ENSGALT00000046722	4/23	-	259	259	87	R/W	Cgg/Tgg	-	deleterious(0)	-6.669	1kn6A00&Pfam_domain:PF16470&PTHR10795&PTHR10795:SF345&Superfamily_domains:SSF54897	serine-type endopeptidase activity [GO:0004252]	embryo,nervous system,skeleton,reproductive,craniofacial,endocrine/exocrine,neoplasm,vision/eye,mortality/aging,respiratory,cardiovascular,growth/size/body,digestive/alimentary	YES
10	18090225	CA	TG	30135.3	225	104	450	94	10	WA	10:47,0:0,0:0	GG-WUR-108_GG-WUR-113_GG-WUR-036_GG-WUR-051_GG-WUR-123_GG-WUR-153_GG-WUR-134_GG-WUR-090_GG-WUR-056_GG-WUR-089:GG-WUR-068_GG-WUR-154_GG-WUR-042_GG-WUR-114_GG-WUR-156_GG-WUR-059_GG-WUR-116_GG-WUR-120_GG-WUR-117_GG-WUR-159_GG-WUR-258_GG-WUR-162_GG-WUR-092_GG-WUR-163_GG-WUR-069_GG-WUR-115_GG-WUR-130_GG-WUR-236_GG-WUR-055_GG-WUR-175_GG-WUR-050_GG-WUR-118_GG-WUR-252_GG-WUR-111_GG-WUR-119_GG-WUR-122_GG-…	152	66|2|0	splice_acceptor_variant&intron_variant	HIGH	VWA9	ENSGALG00000007491	ENSGALT00000012111	-	1/11	-	-	-	-	-	-	-	NA	-	-	-	YES
10	20072480	G	A	54892.1	211	102	422	102	0	WA	0:51,0:0,0:0	.:GG-WUR-108_GG-WUR-068_GG-WUR-154_GG-WUR-042_GG-WUR-121_GG-WUR-156_GG-WUR-059_GG-WUR-116_GG-WUR-113_GG-WUR-120_GG-WUR-117_GG-WUR-159_GG-WUR-036_GG-WUR-162_GG-WUR-051_GG-WUR-092_GG-WUR-163_GG-WUR-115_GG-WUR-130_GG-WUR-236_GG-WUR-123_GG-WUR-055_GG-WUR-175_GG-WUR-050_GG-WUR-153_GG-WUR-118_GG-WUR-111_GG-WUR-119_GG-WUR-122_GG-WUR-088_GG-WUR-147_GG-WUR-090_GG-WUR-096_GG-WUR-136_GG-WUR-160_GG-WUR-135_G…	2148	59|7|0	missense_variant	MODERATE	CIB1	ENSGALG00000008302	ENSGALT00000013516	4/7	-	381	334	112	R/C	Cgc/Tgc	-	deleterious(0.01)	-6.996	PROSITE_profiles:PS50222&PTHR23056&PTHR23056:SF53&Pfam_domain:PF13499&1.10.238.10&SMART_domains:SM00054&Superfamily_domains:SSF47473	centrosome [GO:0005813]; endoplasmic reticulum [GO:0005783]; extracellular exosome [GO:0070062]; filopodium tip [GO:0032433]; growth cone [GO:0030426]; lamellipodium [GO:0030027]; neuronal cell body [GO:0043025]; nucleoplasm [GO:0005654]; perinuclear region of cytoplasm [GO:0048471]; sarcolemma [GO:0042383]; calcium ion binding [GO:0005509]; calcium-dependent protein kinase inhibitor activity [GO…	reproductive,cellular,endocrine/exocrine	YES
11	8501435	C	T	25599.5	243	128	486	120	8	WA	8:60,0:0,0:0	GG-WUR-108_GG-WUR-042_GG-WUR-114_GG-WUR-122_GG-WUR-240_GG-WUR-164_GG-WUR-039_GG-WUR-052:GG-WUR-262_GG-WUR-068_GG-WUR-154_GG-WUR-121_GG-WUR-156_GG-WUR-059_GG-WUR-253_GG-WUR-116_GG-WUR-261_GG-WUR-257_GG-WUR-113_GG-WUR-120_GG-WUR-159_GG-WUR-258_GG-WUR-036_GG-WUR-162_GG-WUR-256_GG-WUR-239_GG-WUR-051_GG-WUR-092_GG-WUR-163_GG-WUR-069_GG-WUR-115_GG-WUR-130_GG-WUR-238_GG-WUR-236_GG-WUR-123_GG-WUR-055_GG-…	-6	0|0|0	splice_acceptor_variant&non_coding_transcript_variant	HIGH	-	ENSGALG00000029853	ENSGALT00000059101	-	4/5	-	-	-	-	-	-	-	NA	-		-	YES
12	19480212	A	G	27057.9	242	129	484	126	3	WA	3:63,0:0,0:0	GG-WUR-253_GG-WUR-135_GG-WUR-039:GG-WUR-108_GG-WUR-262_GG-WUR-068_GG-WUR-154_GG-WUR-042_GG-WUR-114_GG-WUR-121_GG-WUR-156_GG-WUR-059_GG-WUR-116_GG-WUR-261_GG-WUR-257_GG-WUR-113_GG-WUR-120_GG-WUR-117_GG-WUR-159_GG-WUR-036_GG-WUR-162_GG-WUR-256_GG-WUR-239_GG-WUR-051_GG-WUR-092_GG-WUR-163_GG-WUR-069_GG-WUR-115_GG-WUR-130_GG-WUR-238_GG-WUR-236_GG-WUR-123_GG-WUR-055_GG-WUR-263_GG-WUR-175_GG-WUR-050_GG-…	3512	51|4|0	missense_variant	MODERATE	IRAK2	ENSGALG00000008407	ENSGALT00000036214	9/12	-	1144	1108	370	T/A	Aca/Gca	-	tolerated(0.1)	-2.849	PROSITE_profiles:PS50011&PTHR24419:SF2&PTHR24419&1.10.510.10&Pfam_domain:PF00069&Superfamily_domains:SSF56112	cytoplasm [GO:0005737]; nucleus [GO:0005634]; ATP binding [GO:0005524]; protein serine/threonine kinase activity [GO:0004674]; I-kappaB kinase/NF-kappaB signaling [GO:0007249]; inflammatory response [GO:0006954]; interleukin-1-mediated signaling pathway [GO:0070498]; intracellular signal transduction [GO:0035556]; lipopolysaccharide-mediated signaling pathway [GO:0031663]; MyD88-dependent toll-li…	immune,homeostasis,hematopoietic,mortality/aging	YES
12	19533385	GA	TG	27555.7	248	138	496	136	2	WA	2:68,0:0,0:0	GG-WUR-253_GG-WUR-135:GG-WUR-108_GG-WUR-262_GG-WUR-068_GG-WUR-154_GG-WUR-042_GG-WUR-114_GG-WUR-121_GG-WUR-156_GG-WUR-059_GG-WUR-116_GG-WUR-261_GG-WUR-257_GG-WUR-113_GG-WUR-120_GG-WUR-117_GG-WUR-159_GG-WUR-258_GG-WUR-036_GG-WUR-162_GG-WUR-256_GG-WUR-239_GG-WUR-051_GG-WUR-092_GG-WUR-163_GG-WUR-069_GG-WUR-115_GG-WUR-130_GG-WUR-238_GG-WUR-236_GG-WUR-123_GG-WUR-055_GG-WUR-263_GG-WUR-175_GG-WUR-050_GG-…	636	63|4|0	missense_variant	MODERATE	IFT122	ENSGALG00000008452	ENSGALT00000013770	16/29	-	1832-1833	1832-1833	611	R/L	cGA/cTG	-	deleterious(0.01)	-4.863	PTHR12764&PTHR12764:SF4	ciliary basal body [GO:0036064]; ciliary base [GO:0097546]; cilium [GO:0005929]; cytoplasm [GO:0005737]; intraciliary transport particle A [GO:0030991]; membrane [GO:0016020]; photoreceptor connecting cilium [GO:0032391]; camera-type eye morphogenesis [GO:0048593]; ciliary receptor clustering involved in smoothened signaling pathway [GO:0060830]; embryonic body morphogenesis [GO:0010172]; embryon…	embryo,craniofacial,digestive/alimentary,limbs/digits/tail,vision/eye,cellular,mortality/aging,nervous system,growth/size/body,homeostasis,cardiovascular	NO
12	19758896	C	T	25712.4	227	122	454	120	2	WA	2:60,0:0,0:0	GG-WUR-135_GG-WUR-255:GG-WUR-108_GG-WUR-068_GG-WUR-154_GG-WUR-042_GG-WUR-114_GG-WUR-121_GG-WUR-156_GG-WUR-059_GG-WUR-116_GG-WUR-261_GG-WUR-113_GG-WUR-120_GG-WUR-117_GG-WUR-159_GG-WUR-258_GG-WUR-036_GG-WUR-162_GG-WUR-256_GG-WUR-239_GG-WUR-051_GG-WUR-092_GG-WUR-163_GG-WUR-069_GG-WUR-115_GG-WUR-130_GG-WUR-236_GG-WUR-123_GG-WUR-055_GG-WUR-263_GG-WUR-175_GG-WUR-050_GG-WUR-153_GG-WUR-118_GG-WUR-111_GG-…	489	67|2|0	missense_variant	MODERATE	RBSN	ENSGALG00000008500	ENSGALT00000013847	1/11	-	77	38	13	A/V	gCg/gTg	-	deleterious(0.03)	-2.291	PTHR13510&PTHR13510:SF18	cytoplasmic side of endosome membrane [GO:0010009]; cytosol [GO:0005829]; extracellular exosome [GO:0070062]; intracellular membrane-bounded organelle [GO:0043231]; metal ion binding [GO:0046872]; Rab GTPase binding [GO:0017137]; early endosome to Golgi transport [GO:0034498]; endocytosis [GO:0006897]; endosomal vesicle fusion [GO:0034058]; Golgi to endosome transport [GO:0006895]; Golgi to lysos…	mortality/aging,pigmentation,vision/eye	NO
17	9519516	A	G	24925.4	245	138	490	134	4	WA	4:67,0:0,0:0	GG-WUR-121_GG-WUR-069_GG-WUR-251_GG-WUR-053:GG-WUR-108_GG-WUR-262_GG-WUR-068_GG-WUR-154_GG-WUR-042_GG-WUR-114_GG-WUR-156_GG-WUR-059_GG-WUR-253_GG-WUR-116_GG-WUR-261_GG-WUR-257_GG-WUR-113_GG-WUR-120_GG-WUR-117_GG-WUR-159_GG-WUR-258_GG-WUR-036_GG-WUR-162_GG-WUR-256_GG-WUR-239_GG-WUR-051_GG-WUR-092_GG-WUR-163_GG-WUR-115_GG-WUR-130_GG-WUR-238_GG-WUR-236_GG-WUR-123_GG-WUR-055_GG-WUR-263_GG-WUR-175_GG-…	1168	58|11|0	missense_variant	MODERATE	DENND1A	ENSGALG00000001157	ENSGALT00000001740	21/23	-	1592	1592	531	I/T	aTt/aCt	-	deleterious(0.04)	-3.71	PTHR13196&PTHR13196:SF22	-	-	YES
19	2709555	G	A	24690.1	248	121	496	104	17	WA	17:52,0:0,0:0	GG-WUR-121_GG-WUR-156_GG-WUR-261_GG-WUR-258_GG-WUR-036_GG-WUR-162_GG-WUR-256_GG-WUR-123_GG-WUR-118_GG-WUR-122_GG-WUR-088_GG-WUR-160_GG-WUR-164_GG-WUR-251_GG-WUR-056_GG-WUR-112_GG-WUR-237:GG-WUR-108_GG-WUR-262_GG-WUR-068_GG-WUR-154_GG-WUR-042_GG-WUR-114_GG-WUR-059_GG-WUR-253_GG-WUR-116_GG-WUR-257_GG-WUR-113_GG-WUR-120_GG-WUR-117_GG-WUR-159_GG-WUR-239_GG-WUR-051_GG-WUR-092_GG-WUR-163_GG-WUR-069_GG-…	317	42|20|0	missense_variant&splice_region_variant	MODERATE	GTF2IRD1	ENSGALG00000001263	ENSGALT00000052981	11/24	-	1403	1403	468	A/V	gCg/gTg	-	deleterious(0.04)	1	PIRSF_domain:PIRSF016441	cytoplasm [GO:0005737]; nucleoplasm [GO:0005654]; DNA binding [GO:0003677]; RNA polymerase II transcription factor activity, sequence-specific DNA binding [GO:0000981]; transcription, DNA-templated [GO:0006351]; transition between slow and fast fiber [GO:0014886]	embryo,pigmentation,skeleton,respiratory,craniofacial,adipose,muscle,liver/biliary,neoplasm,vision/eye,behavior,mortality/aging,integument,nervous system,growth/size/body,homeostasis,cardiovascular	YES

## Sheet: TableS2
Table S2: high frequency deleterious variation in WD line
CHROM	POS	REF	ALT	QUAL	Number_of_samples	Allele_count	Allele_number	Allele_count_homozygote	Allele_count_heterozygote	Breed	Allele_count_breed(WA_het:WA_hom,WD_het:WD_hom,W1_het:W1_hom)	tAllele_count_samples(WA_het:WA_hom,WD_het:WD_hom,W1_het:W1_hom)	RNA_seq_coverage(ensembl)	Ensembl_Orthology(one2one|one2many|many2many)	Consequence	IMPACT	SYMBOL	Gene	Transcript	EXON_NR	INTRON_NR	cDNA_position	CDS_position	Protein_position	Amino_acids	Codons	Phenotype	SIFT	Provean	Domains	GO	Phenotype	dbSNP
1	24710555	T	C	24283.7	231	105	462	70	35	WD	0:0,35:35,0:0	.:.,GG-WUR-205_GG-WUR-133_GG-WUR-203_GG-WUR-241_GG-WUR-075_GG-WUR-189_GG-WUR-221_GG-WUR-071_GG-WUR-206_GG-WUR-198_GG-WUR-132_GG-WUR-197_GG-WUR-188_GG-WUR-209_GG-WUR-070_GG-WUR-199_GG-WUR-207_GG-WUR-083_GG-WUR-195_GG-WUR-223_GG-WUR-073_GG-WUR-072_GG-WUR-204_GG-WUR-191_GG-WUR-229_GG-WUR-137_GG-WUR-214_GG-WUR-219_GG-WUR-084_GG-WUR-184_GG-WUR-213_GG-WUR-181_GG-WUR-231_GG-WUR-225_GG-WUR-079:GG-WUR-228…	-79	60|2|0	splice_donor_variant	HIGH	WNT2	ENSGALG00000030173	ENSGALT00000069908	-	1/1	-	-	-	-	-	-	-	NA	-	proteinaceous extracellular matrix [GO:0005578]; multicellular organism development [GO:0007275]; Wnt signaling pathway [GO:0016055]integral component of membrane [GO:0016021]; proteinaceous extracellular matrix [GO:0005578]; multicellular organism development [GO:0007275]; Wnt signaling pathway [GO:0016055]	embryo,respiratory,growth/size/body,cellular,mortality/aging,homeostasis,cardiovascular	YES
1	46007504	AAACA	AA	18845.9	224	118	448	86	32	WD	0:0,32:43,0:0	.:.,GG-WUR-205_GG-WUR-241_GG-WUR-228_GG-WUR-186_GG-WUR-177_GG-WUR-180_GG-WUR-076_GG-WUR-126_GG-WUR-081_GG-WUR-196_GG-WUR-201_GG-WUR-218_GG-WUR-070_GG-WUR-199_GG-WUR-125_GG-WUR-078_GG-WUR-083_GG-WUR-224_GG-WUR-223_GG-WUR-072_GG-WUR-187_GG-WUR-204_GG-WUR-080_GG-WUR-219_GG-WUR-084_GG-WUR-184_GG-WUR-213_GG-WUR-181_GG-WUR-225_GG-WUR-079_GG-WUR-212_GG-WUR-232:GG-WUR-133_GG-WUR-203_GG-WUR-075_GG-WUR-235…	203	50|0|0	inframe_deletion	MODERATE	-	ENSGALG00000030853	ENSGALT00000083016	22/29	-	2754-2757	2754-2757	918-919	QT/Q	caAACA/caA	-	-	-3.288	PTHR33487	-	-	NO
1	51220299	G	A	24643.3	222	120	444	94	26	WD	0:0,26:47,0:0	.:.,GG-WUR-205_GG-WUR-075_GG-WUR-228_GG-WUR-220_GG-WUR-221_GG-WUR-076_GG-WUR-081_GG-WUR-201_GG-WUR-194_GG-WUR-082_GG-WUR-185_GG-WUR-070_GG-WUR-125_GG-WUR-200_GG-WUR-224_GG-WUR-233_GG-WUR-193_GG-WUR-204_GG-WUR-080_GG-WUR-137_GG-WUR-219_GG-WUR-181_GG-WUR-215_GG-WUR-183_GG-WUR-225_GG-WUR-190:GG-WUR-203_GG-WUR-241_GG-WUR-235_GG-WUR-182_GG-WUR-179_GG-WUR-202_GG-WUR-189_GG-WUR-192_GG-WUR-186_GG-WUR-177…	761	57|7|0	missense_variant	MODERATE	SH3BP1	ENSGALG00000012422	ENSGALT00000020305	15/15	-	2072	2072	691	P/L	cCg/cTg	-	deleterious_low_confidence(0)	-2.875	-	cytoplasm [GO:0005737]; signal transduction [GO:0007165]	-	YES
1	64534106	A	G	17910.6	193	126	386	126	0	WD	0:0,0:63,0:0	.:.,.:GG-WUR-205_GG-WUR-133_GG-WUR-203_GG-WUR-235_GG-WUR-182_GG-WUR-179_GG-WUR-220_GG-WUR-202_GG-WUR-189_GG-WUR-192_GG-WUR-221_GG-WUR-186_GG-WUR-177_GG-WUR-138_GG-WUR-071_GG-WUR-211_GG-WUR-206_GG-WUR-180_GG-WUR-076_GG-WUR-230_GG-WUR-126_GG-WUR-081_GG-WUR-201_GG-WUR-198_GG-WUR-194_GG-WUR-132_GG-WUR-197_GG-WUR-178_GG-WUR-188_GG-WUR-218_GG-WUR-082_GG-WUR-210_GG-WUR-185_GG-WUR-070_GG-WUR-222_GG-WUR-1…	1424	50|25|0	missense_variant	MODERATE	-	ENSGALG00000013134	ENSGALT00000021439	12/12	-	1871	1871	624	Y/C	tAt/tGt	-	deleterious(0.03)	0.98	-	-	-	YES
1	91528147	A	G	32584.6	245	139	490	126	13	WD	0:0,13:63,0:0	.:.,GG-WUR-133_GG-WUR-203_GG-WUR-241_GG-WUR-217_GG-WUR-194_GG-WUR-132_GG-WUR-200_GG-WUR-176_GG-WUR-072_GG-WUR-219_GG-WUR-215_GG-WUR-231_GG-WUR-225:GG-WUR-205_GG-WUR-075_GG-WUR-235_GG-WUR-182_GG-WUR-228_GG-WUR-179_GG-WUR-220_GG-WUR-202_GG-WUR-189_GG-WUR-192_GG-WUR-221_GG-WUR-186_GG-WUR-177_GG-WUR-138_GG-WUR-071_GG-WUR-211_GG-WUR-208_GG-WUR-206_GG-WUR-180_GG-WUR-076_GG-WUR-230_GG-WUR-126_GG-WUR-081…	994	50|8|0	missense_variant	MODERATE	MPZL1	ENSGALG00000015438	ENSGALT00000024901	1/3	-	142	8	3	L/P	cTt/cCt	-	deleterious_low_confidence(0)	-0.958	PROSITE_profiles:PS50835&PTHR13869&PTHR13869:SF19&Low_complexity_(Seg):seg&Cleavage_site_(Signalp):SignalP-noTM	integral component of plasma membrane [GO:0005887]; signal transduction [GO:0007165]integral component of plasma membrane [GO:0005887]; signal transduction [GO:0007165]	behavior,no abnormal phenotype observed	YES
1	119925030	A	C	18981	244	113	488	84	29	WD	0:0,29:42,0:0	.:.,GG-WUR-205_GG-WUR-133_GG-WUR-182_GG-WUR-189_GG-WUR-192_GG-WUR-221_GG-WUR-186_GG-WUR-177_GG-WUR-217_GG-WUR-071_GG-WUR-208_GG-WUR-206_GG-WUR-180_GG-WUR-196_GG-WUR-194_GG-WUR-197_GG-WUR-218_GG-WUR-082_GG-WUR-222_GG-WUR-199_GG-WUR-200_GG-WUR-195_GG-WUR-223_GG-WUR-073_GG-WUR-187_GG-WUR-204_GG-WUR-229_GG-WUR-084_GG-WUR-183:GG-WUR-203_GG-WUR-075_GG-WUR-235_GG-WUR-228_GG-WUR-220_GG-WUR-202_GG-WUR-138…	498	53|12|0	splice_acceptor_variant	HIGH	MAP7D2	ENSGALG00000016415	ENSGALT00000054063	-	7/14	-	-	-	-	-	-	-	NA	-	microtubule cytoskeleton [GO:0015630]; structural molecule activity [GO:0005198]; microtubule cytoskeleton organization [GO:0000226]	no abnormal phenotype observed	YES
1	136915124	C	T	19258.4	247	120	494	94	26	WD	0:0,26:47,0:0	.:.,GG-WUR-133_GG-WUR-202_GG-WUR-189_GG-WUR-186_GG-WUR-217_GG-WUR-211_GG-WUR-208_GG-WUR-206_GG-WUR-180_GG-WUR-126_GG-WUR-196_GG-WUR-198_GG-WUR-194_GG-WUR-132_GG-WUR-197_GG-WUR-188_GG-WUR-218_GG-WUR-222_GG-WUR-199_GG-WUR-223_GG-WUR-187_GG-WUR-204_GG-WUR-214_GG-WUR-183_GG-WUR-190_GG-WUR-212:GG-WUR-205_GG-WUR-203_GG-WUR-075_GG-WUR-182_GG-WUR-228_GG-WUR-179_GG-WUR-220_GG-WUR-192_GG-WUR-221_GG-WUR-177…	207	56|12|0	missense_variant	MODERATE	UPF3A	ENSGALG00000016815	ENSGALT00000027147	10/10	-	1457	1457	486	G/D	gGc/gAc	-	deleterious(0.01)	-2.823	-	cytoplasm [GO:0005737]; exon-exon junction complex [GO:0035145]; nucleoplasm [GO:0005654]; plasma membrane [GO:0005886]; nucleotide binding [GO:0000166]; telomeric DNA binding [GO:0042162]; positive regulation of translation [GO:0045727]	-	YES
1	165842842	A	G	23296.7	245	119	490	96	23	WD	0:0,23:48,0:0	.:.,GG-WUR-189_GG-WUR-192_GG-WUR-211_GG-WUR-180_GG-WUR-076_GG-WUR-196_GG-WUR-132_GG-WUR-188_GG-WUR-082_GG-WUR-070_GG-WUR-125_GG-WUR-078_GG-WUR-077_GG-WUR-200_GG-WUR-176_GG-WUR-223_GG-WUR-193_GG-WUR-073_GG-WUR-187_GG-WUR-227_GG-WUR-231_GG-WUR-190_GG-WUR-212:GG-WUR-205_GG-WUR-133_GG-WUR-203_GG-WUR-241_GG-WUR-075_GG-WUR-235_GG-WUR-182_GG-WUR-228_GG-WUR-179_GG-WUR-220_GG-WUR-202_GG-WUR-186_GG-WUR-177…	6079	64|0|0	missense_variant	MODERATE	WBP4	ENSGALG00000016949	ENSGALT00000027397	5/10	-	398	347	116	K/R	aAg/aGg	-	deleterious(0.01)	1	Low_complexity_(Seg):seg&PTHR13173&Coiled-coils_(Ncoils):Coil	nuclear speck [GO:0016607]; plasma membrane [GO:0005886]; spliceosomal complex [GO:0005681]; nucleic acid binding [GO:0003676]; zinc ion binding [GO:0008270]; mRNA cis splicing, via spliceosome [GO:0045292]	mortality/aging,neoplasm,homeostasis	YES
1	168799593	G	A	29331.1	238	136	476	120	16	WD	0:0,16:60,0:0	.:.,GG-WUR-133_GG-WUR-203_GG-WUR-221_GG-WUR-186_GG-WUR-206_GG-WUR-188_GG-WUR-210_GG-WUR-199_GG-WUR-200_GG-WUR-176_GG-WUR-214_GG-WUR-084_GG-WUR-227_GG-WUR-215_GG-WUR-231_GG-WUR-212:GG-WUR-205_GG-WUR-241_GG-WUR-075_GG-WUR-235_GG-WUR-182_GG-WUR-228_GG-WUR-179_GG-WUR-220_GG-WUR-202_GG-WUR-189_GG-WUR-192_GG-WUR-177_GG-WUR-138_GG-WUR-217_GG-WUR-071_GG-WUR-211_GG-WUR-208_GG-WUR-076_GG-WUR-230_GG-WUR-126…	2213	48|17|0	missense_variant	MODERATE	LPAR6	ENSGALG00000016998	ENSGALT00000027460	1/2	-	373	373	125	R/C	Cgc/Tgc	-	deleterious(0)	-6.348	1.20.1070.10&Pfam_domain:PF00001&PROSITE_profiles:PS50262&PTHR24232&PTHR24232:SF3&Superfamily_domains:SSF81321	integral component of membrane [GO:0016021]; G-protein coupled receptor activity [GO:0004930]	hematopoietic	YES
2	38742723	AGCACCATCA	AGCACCATCGCACCATCA	12377.2	237	127	474	120	7	WD	0:0,7:60,0:0	.:.,GG-WUR-205_GG-WUR-192_GG-WUR-197_GG-WUR-185_GG-WUR-224_GG-WUR-193_GG-WUR-219:GG-WUR-203_GG-WUR-235_GG-WUR-182_GG-WUR-228_GG-WUR-179_GG-WUR-220_GG-WUR-202_GG-WUR-189_GG-WUR-221_GG-WUR-186_GG-WUR-177_GG-WUR-217_GG-WUR-071_GG-WUR-211_GG-WUR-206_GG-WUR-180_GG-WUR-076_GG-WUR-230_GG-WUR-126_GG-WUR-081_GG-WUR-196_GG-WUR-201_GG-WUR-198_GG-WUR-194_GG-WUR-132_GG-WUR-178_GG-WUR-188_GG-WUR-218_GG-WUR-082…	350	47|22|12	splice_donor_variant&intron_variant	HIGH	EOMES	ENSGALG00000027247	ENSGALT00000042658	-	3/5	-	-	-	-	-	1	-	NA	-	nucleus [GO:0005634]; chromatin binding [GO:0003682]; RNA polymerase II regulatory region sequence-specific DNA binding [GO:0000977]; transcription factor activity, sequence-specific DNA binding [GO:0003700]; transcriptional repressor activity, RNA polymerase II transcription factor binding [GO:0001191]; cardioblast differentiation [GO:0010002]; CD8-positive, alpha-beta T cell differentiation inv…	embryo,skeleton,reproductive,growth/size/body,no abnormal phenotype observed,adipose,immune,neoplasm,vision/eye,cellular,behavior,mortality/aging,nervous system,hematopoietic	NO
2	42922084	A	G	25689.9	248	137	496	120	17	WD	0:0,17:60,0:0	.:.,GG-WUR-203_GG-WUR-075_GG-WUR-221_GG-WUR-217_GG-WUR-126_GG-WUR-194_GG-WUR-197_GG-WUR-178_GG-WUR-218_GG-WUR-078_GG-WUR-083_GG-WUR-224_GG-WUR-195_GG-WUR-223_GG-WUR-193_GG-WUR-183_GG-WUR-212:GG-WUR-205_GG-WUR-133_GG-WUR-241_GG-WUR-235_GG-WUR-182_GG-WUR-228_GG-WUR-179_GG-WUR-220_GG-WUR-202_GG-WUR-189_GG-WUR-192_GG-WUR-186_GG-WUR-138_GG-WUR-071_GG-WUR-211_GG-WUR-208_GG-WUR-206_GG-WUR-180_GG-WUR-076…	9290	50|31|0	missense_variant	MODERATE	FYCO1	ENSGALG00000040212	ENSGALT00000061252	7/17	-	1670	1670	557	E/G	gAa/gGa	-	deleterious(0.01)	-3.771	Coiled-coils_(Ncoils):Coil	integral component of membrane [GO:0016021]; metal ion binding [GO:0046872]; transport [GO:0006810]	-	YES
2	42925603	C	T	17345.6	229	122	458	104	18	WD	0:0,18:52,0:0	.:.,GG-WUR-203_GG-WUR-075_GG-WUR-221_GG-WUR-217_GG-WUR-126_GG-WUR-194_GG-WUR-197_GG-WUR-178_GG-WUR-218_GG-WUR-078_GG-WUR-083_GG-WUR-224_GG-WUR-195_GG-WUR-233_GG-WUR-223_GG-WUR-193_GG-WUR-183_GG-WUR-212:GG-WUR-205_GG-WUR-133_GG-WUR-241_GG-WUR-182_GG-WUR-228_GG-WUR-179_GG-WUR-220_GG-WUR-202_GG-WUR-189_GG-WUR-192_GG-WUR-186_GG-WUR-138_GG-WUR-071_GG-WUR-211_GG-WUR-208_GG-WUR-206_GG-WUR-180_GG-WUR-076…	2905	50|31|0	missense_variant	MODERATE	FYCO1	ENSGALG00000040212	ENSGALT00000061252	9/17	-	3368	3368	1123	T/I	aCa/aTa	-	deleterious(0.04)	-2.349	PTHR18937&1.20.5.340&Coiled-coils_(Ncoils):Coil	integral component of membrane [GO:0016021]; metal ion binding [GO:0046872]; transport [GO:0006810]	-	YES
2	43055657	C	A	31724.9	244	143	488	130	13	WD	0:0,13:65,0:0	.:.,GG-WUR-203_GG-WUR-075_GG-WUR-221_GG-WUR-177_GG-WUR-217_GG-WUR-126_GG-WUR-194_GG-WUR-197_GG-WUR-178_GG-WUR-078_GG-WUR-224_GG-WUR-195_GG-WUR-193:GG-WUR-205_GG-WUR-133_GG-WUR-241_GG-WUR-235_GG-WUR-182_GG-WUR-228_GG-WUR-179_GG-WUR-220_GG-WUR-202_GG-WUR-189_GG-WUR-192_GG-WUR-186_GG-WUR-138_GG-WUR-071_GG-WUR-211_GG-WUR-208_GG-WUR-206_GG-WUR-180_GG-WUR-076_GG-WUR-230_GG-WUR-081_GG-WUR-196_GG-WUR-201…	842	63|13|0	missense_variant	MODERATE	LARS2	ENSGALG00000036309	ENSGALT00000065411	19/20	-	2475	2474	825	S/I	aGt/aTt	-	deleterious(0.02)	-2.297	PTHR11946&PTHR11946:SF7&1.10.730.10&Pfam_domain:PF08264&TIGRFAM_domain:TIGR00396&Superfamily_domains:SSF47323	aminoacyl-tRNA editing activity [GO:0002161]; ATP binding [GO:0005524]; leucine-tRNA ligase activity [GO:0004823]; leucyl-tRNA aminoacylation [GO:0006429]	-	YES
2	83336944	T	A	20780.8	245	111	490	80	31	WD	0:0,31:40,0:0	.:.,GG-WUR-133_GG-WUR-203_GG-WUR-075_GG-WUR-235_GG-WUR-228_GG-WUR-179_GG-WUR-202_GG-WUR-221_GG-WUR-138_GG-WUR-211_GG-WUR-076_GG-WUR-230_GG-WUR-198_GG-WUR-178_GG-WUR-188_GG-WUR-210_GG-WUR-083_GG-WUR-224_GG-WUR-195_GG-WUR-176_GG-WUR-193_GG-WUR-214_GG-WUR-219_GG-WUR-084_GG-WUR-213_GG-WUR-181_GG-WUR-215_GG-WUR-231_GG-WUR-183_GG-WUR-225_GG-WUR-232:GG-WUR-205_GG-WUR-241_GG-WUR-220_GG-WUR-189_GG-WUR-192…	19	0|0|0	splice_acceptor_variant&non_coding_transcript_variant	HIGH	-	ENSGALG00000029886	ENSGALT00000057151	-	1/2	-	-	-	-	-	-	-	NA	-		-	YES
2	83919173	T	C	19030.3	244	117	488	90	27	WD	0:0,27:45,0:0	.:.,GG-WUR-133_GG-WUR-203_GG-WUR-075_GG-WUR-235_GG-WUR-182_GG-WUR-228_GG-WUR-202_GG-WUR-221_GG-WUR-211_GG-WUR-076_GG-WUR-230_GG-WUR-178_GG-WUR-188_GG-WUR-082_GG-WUR-210_GG-WUR-224_GG-WUR-195_GG-WUR-193_GG-WUR-214_GG-WUR-219_GG-WUR-084_GG-WUR-213_GG-WUR-181_GG-WUR-215_GG-WUR-231_GG-WUR-225_GG-WUR-232:GG-WUR-205_GG-WUR-241_GG-WUR-179_GG-WUR-220_GG-WUR-189_GG-WUR-192_GG-WUR-186_GG-WUR-177_GG-WUR-138…	36	0|0|0	splice_donor_variant&non_coding_transcript_variant	HIGH	-	ENSGALG00000033839	ENSGALT00000053914	-	3/8	-	-	-	-	-	-	-	NA	-		-	YES
2	107342307	A	C	20522.7	244	126	488	102	24	WD	0:0,24:51,0:0	.:.,GG-WUR-133_GG-WUR-241_GG-WUR-235_GG-WUR-179_GG-WUR-202_GG-WUR-221_GG-WUR-186_GG-WUR-071_GG-WUR-208_GG-WUR-180_GG-WUR-081_GG-WUR-196_GG-WUR-132_GG-WUR-178_GG-WUR-188_GG-WUR-082_GG-WUR-185_GG-WUR-200_GG-WUR-195_GG-WUR-233_GG-WUR-072_GG-WUR-219_GG-WUR-181_GG-WUR-231:GG-WUR-205_GG-WUR-203_GG-WUR-075_GG-WUR-182_GG-WUR-220_GG-WUR-189_GG-WUR-192_GG-WUR-177_GG-WUR-217_GG-WUR-211_GG-WUR-206_GG-WUR-076…	851	49|3|0	missense_variant	MODERATE	ASXL3	ENSGALG00000015196	ENSGALT00000024516	10/11	-	1208	1208	403	Q/P	cAa/cCa	-	tolerated_low_confidence(0.1)	-2.634	-	DNA binding [GO:0003677]; regulation of transcription, DNA-templated [GO:0006355]; transcription, DNA-templated [GO:0006351]	-	YES
2	108236438	A	G	25576.8	241	127	482	108	19	WD	0:0,19:54,0:0	.:.,GG-WUR-205_GG-WUR-235_GG-WUR-220_GG-WUR-221_GG-WUR-186_GG-WUR-071_GG-WUR-081_GG-WUR-196_GG-WUR-201_GG-WUR-132_GG-WUR-178_GG-WUR-185_GG-WUR-200_GG-WUR-195_GG-WUR-233_GG-WUR-229_GG-WUR-137_GG-WUR-213_GG-WUR-231:GG-WUR-133_GG-WUR-203_GG-WUR-075_GG-WUR-182_GG-WUR-179_GG-WUR-202_GG-WUR-189_GG-WUR-192_GG-WUR-177_GG-WUR-217_GG-WUR-211_GG-WUR-208_GG-WUR-206_GG-WUR-076_GG-WUR-230_GG-WUR-126_GG-WUR-198…	867	52|18|0	missense_variant	MODERATE	-	ENSGALG00000015226	ENSGALT00000036783	5/10	-	585	554	185	E/G	gAa/gGa	-	deleterious(0.03)	-6.086	Pfam_domain:PF14951&PTHR34347&PTHR34347:SF1	-	-	NO
2	108308814	G	A	19566	227	125	454	106	19	WD	0:0,19:53,0:0	.:.,GG-WUR-205_GG-WUR-235_GG-WUR-220_GG-WUR-221_GG-WUR-186_GG-WUR-071_GG-WUR-081_GG-WUR-196_GG-WUR-201_GG-WUR-132_GG-WUR-178_GG-WUR-185_GG-WUR-200_GG-WUR-195_GG-WUR-233_GG-WUR-229_GG-WUR-137_GG-WUR-213_GG-WUR-231:GG-WUR-133_GG-WUR-203_GG-WUR-075_GG-WUR-182_GG-WUR-179_GG-WUR-202_GG-WUR-189_GG-WUR-192_GG-WUR-177_GG-WUR-217_GG-WUR-211_GG-WUR-208_GG-WUR-206_GG-WUR-076_GG-WUR-230_GG-WUR-126_GG-WUR-198…	1445	59|15|0	missense_variant	MODERATE	PRKDC	ENSGALG00000042469	ENSGALT00000065303	34/85	-	4489	4489	1497	P/S	Cca/Tca	-	tolerated(0.11)	-4.466	PTHR11139:SF68&PTHR11139	nucleus [GO:0005634]; ATP binding [GO:0005524]; DNA binding [GO:0003677]; DNA-dependent protein kinase activity [GO:0004677]; double-strand break repair via nonhomologous end joining [GO:0006303]nucleus [GO:0005634]; ATP binding [GO:0005524]; DNA binding [GO:0003677]; DNA-dependent protein kinase activity [GO:0004677]; double-strand break repair via nonhomologous end joining [GO:0006303]	respiratory,growth/size/body,endocrine/exocrine,liver/biliary,immune,renal/urinary,neoplasm,hematopoietic,cellular,mortality/aging,integument,pigmentation,homeostasis,digestive/alimentary	YES
2	124933204	T	C	20593.2	235	113	470	82	31	WD	0:0,31:41,0:0	.:.,GG-WUR-241_GG-WUR-235_GG-WUR-182_GG-WUR-228_GG-WUR-179_GG-WUR-220_GG-WUR-192_GG-WUR-221_GG-WUR-186_GG-WUR-071_GG-WUR-208_GG-WUR-180_GG-WUR-081_GG-WUR-196_GG-WUR-201_GG-WUR-132_GG-WUR-197_GG-WUR-178_GG-WUR-218_GG-WUR-209_GG-WUR-222_GG-WUR-199_GG-WUR-195_GG-WUR-223_GG-WUR-193_GG-WUR-073_GG-WUR-080_GG-WUR-137_GG-WUR-084_GG-WUR-231_GG-WUR-232:GG-WUR-205_GG-WUR-133_GG-WUR-075_GG-WUR-202_GG-WUR-189…	1704	60|11|0	missense_variant	MODERATE	NBN	ENSGALG00000037686	ENSGALT00000052864	7/16	-	791	739	247	T/A	Acg/Gcg	-	tolerated(0.19)	-2.536	PTHR12162:SF0&PTHR12162&Pfam_domain:PF16508&PIRSF_domain:PIRSF011869	chromosome, telomeric region [GO:0000781]; Mre11 complex [GO:0030870]; DNA repair [GO:0006281]; meiotic cell cycle [GO:0051321]; mitotic cell cycle checkpoint [GO:0007093]; telomere maintenance [GO:0000723]chromosome, telomeric region [GO:0000781]; Mre11 complex [GO:0030870]; DNA repair [GO:0006281]; meiotic cell cycle [GO:0051321]; mitotic cell cycle checkpoint [GO:0007093]; telomere maintenance…	embryo,behavior,reproductive,growth/size/body,endocrine/exocrine,immune,neoplasm,vision/eye,homeostasis,cellular,mortality/aging,nervous system,hematopoietic	YES
2	125171681	C	T	22732.4	224	138	448	138	0	WD	0:0,0:69,0:0	.:.,.:GG-WUR-205_GG-WUR-203_GG-WUR-241_GG-WUR-075_GG-WUR-235_GG-WUR-182_GG-WUR-228_GG-WUR-179_GG-WUR-220_GG-WUR-202_GG-WUR-189_GG-WUR-192_GG-WUR-186_GG-WUR-177_GG-WUR-217_GG-WUR-071_GG-WUR-208_GG-WUR-206_GG-WUR-180_GG-WUR-076_GG-WUR-230_GG-WUR-126_GG-WUR-081_GG-WUR-196_GG-WUR-201_GG-WUR-198_GG-WUR-194_GG-WUR-132_GG-WUR-197_GG-WUR-178_GG-WUR-188_GG-WUR-218_GG-WUR-082_GG-WUR-210_GG-WUR-209_GG-WUR-1…	-14	56|0|0	splice_donor_variant	HIGH	TMEM64	ENSGALG00000042599	ENSGALT00000060884	-	1/5	-	-	-	-	-	-	-	NA	-	integral component of membrane [GO:0016021]	immune,homeostasis,hematopoietic,cellular,skeleton	NO
3	15428241	G	A	18103.2	229	130	458	112	18	WD	0:0,18:56,0:0	.:.,GG-WUR-228_GG-WUR-177_GG-WUR-138_GG-WUR-076_GG-WUR-081_GG-WUR-198_GG-WUR-132_GG-WUR-218_GG-WUR-082_GG-WUR-185_GG-WUR-077_GG-WUR-200_GG-WUR-083_GG-WUR-233_GG-WUR-223_GG-WUR-080_GG-WUR-227_GG-WUR-212:GG-WUR-205_GG-WUR-133_GG-WUR-203_GG-WUR-241_GG-WUR-075_GG-WUR-182_GG-WUR-179_GG-WUR-220_GG-WUR-202_GG-WUR-189_GG-WUR-192_GG-WUR-221_GG-WUR-186_GG-WUR-217_GG-WUR-071_GG-WUR-211_GG-WUR-208_GG-WUR-206…	570	51|11|0	stop_gained	HIGH	BIRC5	ENSGALG00000008713	ENSGALT00000053383	3/3	-	385	361	121	Q/*	Cag/Tag	-	-	NA	-	cytoplasm [GO:0005737]; nucleus [GO:0005634]; spindle microtubule [GO:0005876]; cysteine-type endopeptidase inhibitor activity [GO:0004869]; ubiquitin-protein transferase activity [GO:0004842]; inhibition of cysteine-type endopeptidase activity involved in apoptotic process [GO:1990001]; mitotic spindle assembly [GO:0090307]; negative regulation of neuron apoptotic process [GO:0043524]; regulatio…	embryo,endocrine/exocrine,immune,neoplasm,hematopoietic,cellular,mortality/aging,integument,homeostasis	YES
3	38125343	C	G	25862.4	244	138	488	120	18	WD	0:0,18:60,0:0	.:.,GG-WUR-205_GG-WUR-133_GG-WUR-075_GG-WUR-228_GG-WUR-202_GG-WUR-208_GG-WUR-076_GG-WUR-230_GG-WUR-126_GG-WUR-198_GG-WUR-132_GG-WUR-200_GG-WUR-195_GG-WUR-191_GG-WUR-229_GG-WUR-219_GG-WUR-084_GG-WUR-181:GG-WUR-203_GG-WUR-241_GG-WUR-235_GG-WUR-182_GG-WUR-179_GG-WUR-220_GG-WUR-189_GG-WUR-192_GG-WUR-221_GG-WUR-186_GG-WUR-177_GG-WUR-138_GG-WUR-217_GG-WUR-071_GG-WUR-211_GG-WUR-206_GG-WUR-180_GG-WUR-081…	1913	64|7|0	missense_variant	MODERATE	LYST	ENSGALG00000032840	ENSGALT00000058745	30/52	-	8359	8267	2756	A/G	gCt/gGt	-	tolerated(0.37)	-2.772	PTHR13743&PTHR13743:SF86	lysosome organization [GO:0007040]lysosome organization [GO:0007040]	nervous system,cellular,hearing/vestibular/ear,respiratory,craniofacial,limbs/digits/tail,immune,renal/urinary,neoplasm,vision/eye,homeostasis,behavior,integument,pigmentation,growth/size/body,hematopoietic	NO
3	40242004	T	C	22163.8	242	115	484	86	29	WD	0:0,29:43,0:0	.:.,GG-WUR-075_GG-WUR-235_GG-WUR-182_GG-WUR-179_GG-WUR-220_GG-WUR-206_GG-WUR-180_GG-WUR-230_GG-WUR-126_GG-WUR-201_GG-WUR-194_GG-WUR-197_GG-WUR-125_GG-WUR-078_GG-WUR-200_GG-WUR-083_GG-WUR-224_GG-WUR-176_GG-WUR-233_GG-WUR-193_GG-WUR-204_GG-WUR-080_GG-WUR-229_GG-WUR-084_GG-WUR-184_GG-WUR-227_GG-WUR-215_GG-WUR-225_GG-WUR-079:GG-WUR-205_GG-WUR-133_GG-WUR-241_GG-WUR-228_GG-WUR-202_GG-WUR-189_GG-WUR-192…	677	62|2|0	missense_variant	MODERATE	URB2	ENSGALG00000011101	ENSGALT00000018087	6/9	-	4269	4112	1371	V/A	gTc/gCc	-	deleterious(0.03)	-3.404	Pfam_domain:PF10441&PTHR15682	aggresome [GO:0016235]; nucleolus [GO:0005730]; ribosome biogenesis [GO:0042254]	-	YES
3	40589130	A	G	21805	240	136	480	118	18	WD	0:0,18:59,0:0	.:.,GG-WUR-075_GG-WUR-182_GG-WUR-179_GG-WUR-192_GG-WUR-221_GG-WUR-208_GG-WUR-126_GG-WUR-198_GG-WUR-194_GG-WUR-083_GG-WUR-193_GG-WUR-204_GG-WUR-080_GG-WUR-229_GG-WUR-184_GG-WUR-215_GG-WUR-225_GG-WUR-079:GG-WUR-205_GG-WUR-133_GG-WUR-203_GG-WUR-241_GG-WUR-235_GG-WUR-228_GG-WUR-220_GG-WUR-202_GG-WUR-189_GG-WUR-186_GG-WUR-177_GG-WUR-138_GG-WUR-217_GG-WUR-071_GG-WUR-211_GG-WUR-206_GG-WUR-180_GG-WUR-076…	1267	66|4|0	missense_variant	MODERATE	COG2	ENSGALG00000011114	ENSGALT00000018104	16/18	-	2013	1930	644	T/A	Aca/Gca	-	tolerated(0.15)	-3.207	Pfam_domain:PF12022&PTHR12961	Golgi stack [GO:0005795]; Golgi transport complex [GO:0017119]; membrane [GO:0016020]; protein transporter activity [GO:0008565]; Golgi organization [GO:0007030]; intra-Golgi vesicle-mediated transport [GO:0006891]	growth/size/body,homeostasis,hematopoietic	YES
3	52227054	A	C	22977.5	241	115	482	88	27	WD	0:0,27:44,0:0	.:.,GG-WUR-205_GG-WUR-203_GG-WUR-182_GG-WUR-228_GG-WUR-179_GG-WUR-220_GG-WUR-189_GG-WUR-186_GG-WUR-217_GG-WUR-208_GG-WUR-206_GG-WUR-197_GG-WUR-210_GG-WUR-070_GG-WUR-222_GG-WUR-199_GG-WUR-078_GG-WUR-207_GG-WUR-224_GG-WUR-176_GG-WUR-233_GG-WUR-191_GG-WUR-084_GG-WUR-181_GG-WUR-190_GG-WUR-212_GG-WUR-232:GG-WUR-133_GG-WUR-241_GG-WUR-075_GG-WUR-235_GG-WUR-192_GG-WUR-221_GG-WUR-177_GG-WUR-138_GG-WUR-071…	521	56|15|0	missense_variant	MODERATE	DYNLT1	ENSGALG00000019979	ENSGALT00000031788	4/5	-	348	267	89	S/R	agT/agG	-	deleterious(0.03)	-2.273	PTHR21255&PTHR21255:SF19&Pfam_domain:PF03645	cytoplasmic microtubule [GO:0005881]; host cell [GO:0043657]; secretory vesicle [GO:0099503]; intracellular transport of viral protein in host cell [GO:0019060]	-	YES
3	104798900	G	A	30326	246	154	492	154	0	WD	0:0,0:77,0:0	.:.,.:GG-WUR-205_GG-WUR-133_GG-WUR-203_GG-WUR-241_GG-WUR-075_GG-WUR-235_GG-WUR-182_GG-WUR-228_GG-WUR-179_GG-WUR-220_GG-WUR-202_GG-WUR-189_GG-WUR-192_GG-WUR-221_GG-WUR-186_GG-WUR-177_GG-WUR-138_GG-WUR-217_GG-WUR-071_GG-WUR-211_GG-WUR-208_GG-WUR-206_GG-WUR-180_GG-WUR-076_GG-WUR-230_GG-WUR-126_GG-WUR-081_GG-WUR-196_GG-WUR-201_GG-WUR-198_GG-WUR-194_GG-WUR-132_GG-WUR-197_GG-WUR-178_GG-WUR-188_GG-WUR-2…	3970	57|7|0	missense_variant	MODERATE	ZNF512	ENSGALG00000016506	ENSGALT00000026630	14/14	-	1685	1685	562	R/Q	cGg/cAg	-	deleterious_low_confidence(0.04)	-1.407	PTHR22979&PTHR22979:SF2	nucleus [GO:0005634]; metal ion binding [GO:0046872]	-	YES
3	107825102	G	A	34141.8	246	137	492	126	11	WD	0:0,11:63,0:0	.:.,GG-WUR-179_GG-WUR-202_GG-WUR-208_GG-WUR-185_GG-WUR-199_GG-WUR-078_GG-WUR-207_GG-WUR-176_GG-WUR-219_GG-WUR-084_GG-WUR-231:GG-WUR-205_GG-WUR-133_GG-WUR-203_GG-WUR-241_GG-WUR-075_GG-WUR-235_GG-WUR-182_GG-WUR-228_GG-WUR-220_GG-WUR-189_GG-WUR-192_GG-WUR-221_GG-WUR-186_GG-WUR-177_GG-WUR-138_GG-WUR-217_GG-WUR-071_GG-WUR-211_GG-WUR-206_GG-WUR-180_GG-WUR-076_GG-WUR-230_GG-WUR-126_GG-WUR-081_GG-WUR-196…	1310	58|10|0	missense_variant&splice_region_variant	MODERATE	FDFT1	ENSGALG00000016665	ENSGALT00000026894	7/8	-	966	883	295	V/M	Gtg/Atg	-	deleterious(0.02)	1	1.10.600.10&Pfam_domain:PF00494&PTHR11626&Superfamily_domains:SSF48576&TIGRFAM_domain:TIGR01559	endoplasmic reticulum membrane [GO:0005789]; integral component of membrane [GO:0016021]; farnesyl-diphosphate farnesyltransferase activity [GO:0004310]; squalene synthase activity [GO:0051996]; cholesterol biosynthetic process [GO:0006695]; ergosterol biosynthetic process [GO:0006696]; farnesyl diphosphate metabolic process [GO:0045338]	embryo,skeleton,reproductive,growth/size/body,behavior,mortality/aging,nervous system	YES
3	108104242	A	G	28866.6	250	156	500	156	0	WD	0:0,0:78,0:0	.:.,.:GG-WUR-205_GG-WUR-133_GG-WUR-203_GG-WUR-241_GG-WUR-075_GG-WUR-235_GG-WUR-182_GG-WUR-228_GG-WUR-179_GG-WUR-220_GG-WUR-202_GG-WUR-189_GG-WUR-192_GG-WUR-221_GG-WUR-186_GG-WUR-177_GG-WUR-138_GG-WUR-217_GG-WUR-071_GG-WUR-211_GG-WUR-208_GG-WUR-206_GG-WUR-180_GG-WUR-076_GG-WUR-230_GG-WUR-126_GG-WUR-081_GG-WUR-196_GG-WUR-201_GG-WUR-198_GG-WUR-194_GG-WUR-132_GG-WUR-197_GG-WUR-178_GG-WUR-188_GG-WUR-2…	349	44|10|8	missense_variant	MODERATE	PKHD1	ENSGALG00000042136	ENSGALT00000069714	19/59	-	2153	2153	718	Q/R	cAg/cGg	-	-	-3.298	-	integral component of membrane [GO:0016021]; regulation of centrosome duplication [GO:0010824]	respiratory,growth/size/body,endocrine/exocrine,liver/biliary,immune,renal/urinary,cellular,no abnormal phenotype observed,mortality/aging,cardiovascular,nervous system,hematopoietic,digestive/alimentary	YES
4	35028963	G	T	34224.5	244	148	488	140	8	WD	0:0,8:70,0:0	.:.,GG-WUR-075_GG-WUR-186_GG-WUR-217_GG-WUR-206_GG-WUR-082_GG-WUR-199_GG-WUR-229_GG-WUR-215:GG-WUR-205_GG-WUR-133_GG-WUR-203_GG-WUR-241_GG-WUR-235_GG-WUR-182_GG-WUR-228_GG-WUR-179_GG-WUR-220_GG-WUR-202_GG-WUR-189_GG-WUR-192_GG-WUR-221_GG-WUR-177_GG-WUR-138_GG-WUR-071_GG-WUR-211_GG-WUR-208_GG-WUR-180_GG-WUR-076_GG-WUR-230_GG-WUR-126_GG-WUR-081_GG-WUR-196_GG-WUR-201_GG-WUR-198_GG-WUR-194_GG-WUR-132…	945	57|3|0	missense_variant	MODERATE	FRAS1	ENSGALG00000010316	ENSGALT00000038383	62/73	-	9733	9490	3164	H/N	Cac/Aac	-	deleterious_low_confidence(0.01)	0.272	PTHR11878&PTHR11878:SF29	integral component of membrane [GO:0016021]; sublamina densa [GO:0061618]; cell communication [GO:0007154]; embryonic limb morphogenesis [GO:0030326]; metanephros morphogenesis [GO:0003338]; morphogenesis of an epithelium [GO:0002009]; palate development [GO:0060021]; protein transport [GO:0015031]; skin development [GO:0043588]	embryo,liver/biliary,respiratory,skeleton,reproductive,pigmentation,craniofacial,nervous system,endocrine/exocrine,limbs/digits/tail,hearing/vestibular/ear,renal/urinary,muscle,vision/eye,cellular,no abnormal phenotype observed,mortality/aging,integument,digestive/alimentary,growth/size/body,cardiovascular	YES
4	39104653	C	A	25013.4	247	114	494	86	28	WD	0:0,28:43,0:0	.:.,GG-WUR-205_GG-WUR-133_GG-WUR-203_GG-WUR-075_GG-WUR-221_GG-WUR-177_GG-WUR-217_GG-WUR-071_GG-WUR-211_GG-WUR-196_GG-WUR-201_GG-WUR-194_GG-WUR-082_GG-WUR-185_GG-WUR-199_GG-WUR-078_GG-WUR-200_GG-WUR-083_GG-WUR-223_GG-WUR-193_GG-WUR-187_GG-WUR-191_GG-WUR-214_GG-WUR-184_GG-WUR-213_GG-WUR-227_GG-WUR-215_GG-WUR-231:GG-WUR-241_GG-WUR-235_GG-WUR-182_GG-WUR-228_GG-WUR-179_GG-WUR-220_GG-WUR-202_GG-WUR-192…	1429	47|4|0	missense_variant	MODERATE	TET2	ENSGALG00000010592	ENSGALT00000017236	1/9	-	2592	2592	864	Q/H	caG/caT	-	deleterious(0.04)	-1.217	PTHR23358	nucleus [GO:0005634]; ferrous iron binding [GO:0008198]; iron ion binding [GO:0005506]; methylcytosine dioxygenase activity [GO:0070579]; zinc ion binding [GO:0008270]; 5-methylcytosine catabolic process [GO:0006211]; cytosine metabolic process [GO:0019858]; DNA demethylation [GO:0080111]; hematopoietic stem cell homeostasis [GO:0061484]; hemoglobin metabolic process [GO:0020027]; histone H3-K4 t…	growth/size/body,endocrine/exocrine,liver/biliary,immune,renal/urinary,neoplasm,cellular,mortality/aging,hematopoietic,cardiovascular	YES
4	39665663	T	C	27185.1	248	126	496	102	24	WD	0:0,24:51,0:0	.:.,GG-WUR-205_GG-WUR-133_GG-WUR-203_GG-WUR-075_GG-WUR-189_GG-WUR-221_GG-WUR-217_GG-WUR-071_GG-WUR-211_GG-WUR-206_GG-WUR-076_GG-WUR-196_GG-WUR-201_GG-WUR-082_GG-WUR-185_GG-WUR-199_GG-WUR-078_GG-WUR-193_GG-WUR-187_GG-WUR-191_GG-WUR-214_GG-WUR-184_GG-WUR-227_GG-WUR-231:GG-WUR-241_GG-WUR-235_GG-WUR-182_GG-WUR-228_GG-WUR-179_GG-WUR-220_GG-WUR-202_GG-WUR-192_GG-WUR-177_GG-WUR-138_GG-WUR-208_GG-WUR-180…	-59	0|0|0	splice_donor_variant&non_coding_transcript_variant	HIGH	-	ENSGALG00000042431	ENSGALT00000055208	-	3/6	-	-	-	-	-	-	-	NA	-		-	YES
4	89110223	T	C	21897.3	235	111	470	80	31	WD	0:0,31:40,0:0	.:.,GG-WUR-133_GG-WUR-241_GG-WUR-228_GG-WUR-179_GG-WUR-221_GG-WUR-186_GG-WUR-217_GG-WUR-211_GG-WUR-208_GG-WUR-206_GG-WUR-196_GG-WUR-201_GG-WUR-198_GG-WUR-194_GG-WUR-132_GG-WUR-188_GG-WUR-218_GG-WUR-210_GG-WUR-185_GG-WUR-070_GG-WUR-222_GG-WUR-199_GG-WUR-207_GG-WUR-224_GG-WUR-223_GG-WUR-073_GG-WUR-214_GG-WUR-084_GG-WUR-184_GG-WUR-213_GG-WUR-227:GG-WUR-205_GG-WUR-203_GG-WUR-075_GG-WUR-182_GG-WUR-220…	383	55|2|0	missense_variant	MODERATE	MAVS	ENSGALG00000040428	ENSGALT00000082786	3/7	-	430	284	95	Y/C	tAc/tGc	-	deleterious(0.03)	-4.337	PTHR21446	integral component of membrane [GO:0016021]; mitochondrion [GO:0005739]; signal transducer activity [GO:0004871]; defense response to virus [GO:0051607]	immune,nervous system,homeostasis,hematopoietic,mortality/aging	YES
5	10184014	A	G	31366.8	246	131	492	112	19	WD	0:0,19:56,0:0	.:.,GG-WUR-205_GG-WUR-133_GG-WUR-235_GG-WUR-189_GG-WUR-138_GG-WUR-194_GG-WUR-132_GG-WUR-218_GG-WUR-082_GG-WUR-210_GG-WUR-185_GG-WUR-222_GG-WUR-125_GG-WUR-224_GG-WUR-233_GG-WUR-214_GG-WUR-184_GG-WUR-181_GG-WUR-183:GG-WUR-203_GG-WUR-241_GG-WUR-075_GG-WUR-182_GG-WUR-228_GG-WUR-179_GG-WUR-220_GG-WUR-202_GG-WUR-192_GG-WUR-221_GG-WUR-186_GG-WUR-177_GG-WUR-217_GG-WUR-071_GG-WUR-211_GG-WUR-208_GG-WUR-206…	628	56|15|0	missense_variant	MODERATE	RIC3	ENSGALG00000005971	ENSGALT00000009600	6/6	-	761	722	241	D/G	gAt/gGt	-	tolerated(0.05)	-5.352	PTHR21723&PTHR21723:SF1	endoplasmic reticulum [GO:0005783]; integral component of membrane [GO:0016021]; intracellular membrane-bounded organelle [GO:0043231]; neuron projection [GO:0043005]; neuronal cell body [GO:0043025]; acetylcholine receptor binding [GO:0033130]; cellular protein complex assembly [GO:0043623]; protein folding [GO:0006457]; protein localization to cell surface [GO:0034394]; synaptic transmission, c…	-	YES
5	37724814	G	C	36004.5	245	154	490	152	2	WD	0:0,2:76,0:0	.:.,GG-WUR-180_GG-WUR-077:GG-WUR-205_GG-WUR-133_GG-WUR-203_GG-WUR-241_GG-WUR-075_GG-WUR-235_GG-WUR-182_GG-WUR-228_GG-WUR-179_GG-WUR-220_GG-WUR-202_GG-WUR-189_GG-WUR-192_GG-WUR-221_GG-WUR-186_GG-WUR-177_GG-WUR-138_GG-WUR-217_GG-WUR-071_GG-WUR-211_GG-WUR-208_GG-WUR-206_GG-WUR-076_GG-WUR-230_GG-WUR-126_GG-WUR-081_GG-WUR-196_GG-WUR-201_GG-WUR-198_GG-WUR-194_GG-WUR-132_GG-WUR-197_GG-WUR-178_GG-WUR-188…	320	60|0|0	splice_donor_variant	HIGH	ZNF410	ENSGALG00000010193	ENSGALT00000080731	-	3/6	-	-	-	-	-	-	-	NA	-	integral component of membrane [GO:0016021]; metal ion binding [GO:0046872]; nucleic acid binding [GO:0003676]metal ion binding [GO:0046872]; nucleic acid binding [GO:0003676]metal ion binding [GO:0046872]; nucleic acid binding [GO:0003676]	-	YES
5	44266140	A	C	22745.3	242	136	484	126	10	WD	0:0,10:63,0:0	.:.,GG-WUR-241_GG-WUR-179_GG-WUR-189_GG-WUR-177_GG-WUR-211_GG-WUR-208_GG-WUR-132_GG-WUR-209_GG-WUR-125_GG-WUR-215:GG-WUR-205_GG-WUR-133_GG-WUR-203_GG-WUR-075_GG-WUR-235_GG-WUR-182_GG-WUR-228_GG-WUR-220_GG-WUR-202_GG-WUR-221_GG-WUR-186_GG-WUR-138_GG-WUR-217_GG-WUR-071_GG-WUR-206_GG-WUR-180_GG-WUR-076_GG-WUR-230_GG-WUR-126_GG-WUR-081_GG-WUR-201_GG-WUR-198_GG-WUR-194_GG-WUR-197_GG-WUR-178_GG-WUR-188…	456	57|9|0	missense_variant	MODERATE	C14orf159	ENSGALG00000010703	ENSGALT00000017411	8/13	-	1234	1162	388	K/Q	Aag/Cag	-	deleterious(0.04)	-2.53	Pfam_domain:PF14336&PIRSF_domain:PIRSF037204&PTHR32022	mitochondrion [GO:0005739]	-	YES
6	18191006	T	C	20906.9	242	111	484	86	25	WD	0:0,25:43,0:0	.:.,GG-WUR-075_GG-WUR-220_GG-WUR-189_GG-WUR-192_GG-WUR-177_GG-WUR-138_GG-WUR-071_GG-WUR-206_GG-WUR-180_GG-WUR-076_GG-WUR-126_GG-WUR-196_GG-WUR-201_GG-WUR-132_GG-WUR-188_GG-WUR-209_GG-WUR-073_GG-WUR-080_GG-WUR-191_GG-WUR-229_GG-WUR-137_GG-WUR-184_GG-WUR-215_GG-WUR-079_GG-WUR-212:GG-WUR-133_GG-WUR-203_GG-WUR-235_GG-WUR-182_GG-WUR-228_GG-WUR-179_GG-WUR-202_GG-WUR-221_GG-WUR-186_GG-WUR-211_GG-WUR-208…	-38	44|19|4	splice_acceptor_variant	HIGH	-	ENSGALG00000006095	ENSGALT00000058252	-	25/48	-	-	-	-	-	-	-	NA	-	cytoskeleton [GO:0005856]; bicellular tight junction assembly [GO:0070830]	-	YES
6	18490733	C	T	19832.3	245	108	490	82	26	WD	0:0,26:41,0:0	.:.,GG-WUR-075_GG-WUR-220_GG-WUR-189_GG-WUR-192_GG-WUR-177_GG-WUR-138_GG-WUR-217_GG-WUR-071_GG-WUR-206_GG-WUR-180_GG-WUR-076_GG-WUR-126_GG-WUR-196_GG-WUR-201_GG-WUR-132_GG-WUR-188_GG-WUR-209_GG-WUR-073_GG-WUR-080_GG-WUR-191_GG-WUR-229_GG-WUR-137_GG-WUR-184_GG-WUR-215_GG-WUR-079_GG-WUR-212:GG-WUR-133_GG-WUR-203_GG-WUR-235_GG-WUR-182_GG-WUR-228_GG-WUR-179_GG-WUR-202_GG-WUR-221_GG-WUR-186_GG-WUR-211…	2494	57|7|0	missense_variant	MODERATE	-	ENSGALG00000006165	ENSGALT00000009953	38/62	-	6619	6439	2147	R/W	Cgg/Tgg	-	deleterious(0.04)	-4.076	PTHR13743&PTHR13743:SF85	endomembrane system [GO:0012505]; extrinsic component of membrane [GO:0019898]; phospholipid binding [GO:0005543]	-	NO
7	18139036	A	T	22213.3	230	123	460	98	25	WD	0:0,25:49,0:0	.:.,GG-WUR-075_GG-WUR-235_GG-WUR-182_GG-WUR-189_GG-WUR-192_GG-WUR-221_GG-WUR-138_GG-WUR-071_GG-WUR-211_GG-WUR-126_GG-WUR-198_GG-WUR-132_GG-WUR-178_GG-WUR-185_GG-WUR-070_GG-WUR-125_GG-WUR-078_GG-WUR-077_GG-WUR-224_GG-WUR-176_GG-WUR-204_GG-WUR-080_GG-WUR-191_GG-WUR-229_GG-WUR-231:GG-WUR-205_GG-WUR-133_GG-WUR-203_GG-WUR-241_GG-WUR-228_GG-WUR-179_GG-WUR-220_GG-WUR-202_GG-WUR-186_GG-WUR-177_GG-WUR-217…	1404	58|4|0	missense_variant	MODERATE	METTL8	ENSGALG00000009564	ENSGALT00000015575	4/10	-	416	416	139	H/L	cAc/cTc	-	tolerated(0.46)	-2.533	PIRSF_domain:PIRSF037755	cytoplasm [GO:0005737]; nucleus [GO:0005634]; histone acetyltransferase activity [GO:0004402]; fat cell differentiation [GO:0045444]; skeletal muscle tissue development [GO:0007519]	-	YES
7	18742938	C	T	20208.2	225	122	450	98	24	WD	0:0,24:49,0:0	.:.,GG-WUR-075_GG-WUR-182_GG-WUR-189_GG-WUR-192_GG-WUR-221_GG-WUR-138_GG-WUR-071_GG-WUR-211_GG-WUR-076_GG-WUR-126_GG-WUR-198_GG-WUR-132_GG-WUR-178_GG-WUR-185_GG-WUR-070_GG-WUR-125_GG-WUR-078_GG-WUR-077_GG-WUR-224_GG-WUR-176_GG-WUR-204_GG-WUR-080_GG-WUR-229_GG-WUR-231:GG-WUR-205_GG-WUR-133_GG-WUR-203_GG-WUR-241_GG-WUR-228_GG-WUR-179_GG-WUR-220_GG-WUR-202_GG-WUR-186_GG-WUR-177_GG-WUR-217_GG-WUR-208…	424	62|4|0	missense_variant	MODERATE	FASTKD1	ENSGALG00000009841	ENSGALT00000016000	3/14	-	616	454	152	H/Y	Cac/Tac	-	tolerated(0.06)	-3.687	PTHR21228:SF29&PTHR21228	mitochondrion [GO:0005739]; poly(A) RNA binding [GO:0044822]; protein kinase activity [GO:0004672]	-	YES
7	18927166	A	G	22822	243	122	486	96	26	WD	0:0,26:48,0:0	.:.,GG-WUR-075_GG-WUR-235_GG-WUR-182_GG-WUR-189_GG-WUR-192_GG-WUR-221_GG-WUR-138_GG-WUR-071_GG-WUR-211_GG-WUR-076_GG-WUR-126_GG-WUR-198_GG-WUR-132_GG-WUR-178_GG-WUR-185_GG-WUR-070_GG-WUR-125_GG-WUR-078_GG-WUR-077_GG-WUR-224_GG-WUR-176_GG-WUR-204_GG-WUR-080_GG-WUR-191_GG-WUR-229_GG-WUR-231:GG-WUR-205_GG-WUR-133_GG-WUR-203_GG-WUR-241_GG-WUR-228_GG-WUR-179_GG-WUR-220_GG-WUR-202_GG-WUR-186_GG-WUR-177…	2108	65|4|0	missense_variant	MODERATE	LRP2	ENSGALG00000010858	ENSGALT00000017651	69/79	-	12846	12728	4243	N/S	aAt/aGt	-	tolerated(0.21)	-2.746	2.120.10.30&SMART_domains:SM00135&Superfamily_domains:SSF63825	apical plasma membrane [GO:0016324]; brush border membrane [GO:0031526]; clathrin-coated pit [GO:0005905]; endocytic vesicle [GO:0030139]; endoplasmic reticulum [GO:0005783]; endosome [GO:0005768]; extracellular exosome [GO:0070062]; Golgi apparatus [GO:0005794]; integral component of membrane [GO:0016021]; lysosomal membrane [GO:0005765]; receptor complex [GO:0043235]; calcium ion binding [GO:00…	embryo,respiratory,skeleton,reproductive,hearing/vestibular/ear,craniofacial,endocrine/exocrine,limbs/digits/tail,immune,renal/urinary,vision/eye,homeostasis,behavior,cardiovascular,mortality/aging,nervous system,cellular,growth/size/body,hematopoietic,digestive/alimentary	YES
7	22358070	G	A	26503.1	232	109	464	76	33	WD	0:0,33:38,0:0	.:.,GG-WUR-203_GG-WUR-241_GG-WUR-075_GG-WUR-192_GG-WUR-186_GG-WUR-217_GG-WUR-211_GG-WUR-076_GG-WUR-196_GG-WUR-201_GG-WUR-132_GG-WUR-197_GG-WUR-178_GG-WUR-188_GG-WUR-082_GG-WUR-210_GG-WUR-209_GG-WUR-185_GG-WUR-070_GG-WUR-222_GG-WUR-078_GG-WUR-077_GG-WUR-176_GG-WUR-073_GG-WUR-072_GG-WUR-187_GG-WUR-204_GG-WUR-191_GG-WUR-229_GG-WUR-184_GG-WUR-227_GG-WUR-079_GG-WUR-212:GG-WUR-205_GG-WUR-133_GG-WUR-235…	533	59|13|0	missense_variant	MODERATE	ABCB6	ENSGALG00000029672	ENSGALT00000051888	17/19	-	2504	2504	835	R/H	cGc/cAc	-	deleterious(0.01)	-4.629	PROSITE_profiles:PS50893&PTHR24221&PTHR24221:SF18&3.40.50.300&SMART_domains:SM00382&Superfamily_domains:SSF52540	integral component of membrane [GO:0016021]; ATP binding [GO:0005524]; ATPase activity, coupled to transmembrane movement of substances [GO:0042626]	hematopoietic,cellular,homeostasis,mortality/aging	NO
7	26410830	G	T	20789.8	243	115	486	86	29	WD	0:0,29:43,0:0	.:.,GG-WUR-075_GG-WUR-235_GG-WUR-192_GG-WUR-221_GG-WUR-186_GG-WUR-138_GG-WUR-208_GG-WUR-206_GG-WUR-230_GG-WUR-126_GG-WUR-194_GG-WUR-082_GG-WUR-209_GG-WUR-185_GG-WUR-199_GG-WUR-207_GG-WUR-224_GG-WUR-176_GG-WUR-193_GG-WUR-072_GG-WUR-187_GG-WUR-204_GG-WUR-080_GG-WUR-229_GG-WUR-084_GG-WUR-231_GG-WUR-225_GG-WUR-079_GG-WUR-212:GG-WUR-205_GG-WUR-133_GG-WUR-241_GG-WUR-182_GG-WUR-228_GG-WUR-179_GG-WUR-220…	286	13|0|2	missense_variant	MODERATE	-	ENSGALG00000026460	ENSGALT00000045992	8/8	-	3200	3200	1067	T/N	aCc/aAc	-	tolerated(0.09)	-4.022	2.30.29.30	Rho guanyl-nucleotide exchange factor activity [GO:0005089]; regulation of Rho protein signal transduction [GO:0035023]	-	NO
8	7539870	A	G	19585.2	249	117	498	92	25	WD	0:0,25:46,0:0	.:.,GG-WUR-205_GG-WUR-235_GG-WUR-228_GG-WUR-220_GG-WUR-192_GG-WUR-221_GG-WUR-138_GG-WUR-217_GG-WUR-211_GG-WUR-180_GG-WUR-230_GG-WUR-081_GG-WUR-198_GG-WUR-209_GG-WUR-185_GG-WUR-070_GG-WUR-222_GG-WUR-207_GG-WUR-176_GG-WUR-137_GG-WUR-214_GG-WUR-213_GG-WUR-231_GG-WUR-183_GG-WUR-225:GG-WUR-133_GG-WUR-241_GG-WUR-075_GG-WUR-182_GG-WUR-179_GG-WUR-202_GG-WUR-189_GG-WUR-186_GG-WUR-177_GG-WUR-071_GG-WUR-208…	11386	62|4|0	missense_variant	MODERATE	LAMC1	ENSGALG00000004620	ENSGALT00000039414	25/28	-	4267	4187	1396	N/S	aAc/aGc	-	tolerated(0.26)	-2.806	PTHR10574&PTHR10574:SF270&Coiled-coils_(Ncoils):Coil	basement membrane [GO:0005604]; extracellular exosome [GO:0070062]; extracellular matrix structural constituent [GO:0005201]; cell migration [GO:0016477]; extracellular matrix disassembly [GO:0022617]; hemidesmosome assembly [GO:0031581]; protein complex assembly [GO:0006461]; substrate adhesion-dependent cell spreading [GO:0034446]	embryo,muscle,behavior,reproductive,growth/size/body,endocrine/exocrine,renal/urinary,respiratory,vision/eye,cellular,no abnormal phenotype observed,mortality/aging,nervous system,homeostasis,cardiovascular	YES
8	7561182	C	T	23218.2	248	115	496	92	23	WD	0:0,23:46,0:0	.:.,GG-WUR-205_GG-WUR-235_GG-WUR-228_GG-WUR-220_GG-WUR-192_GG-WUR-221_GG-WUR-138_GG-WUR-217_GG-WUR-180_GG-WUR-230_GG-WUR-081_GG-WUR-198_GG-WUR-209_GG-WUR-185_GG-WUR-070_GG-WUR-222_GG-WUR-207_GG-WUR-176_GG-WUR-214_GG-WUR-213_GG-WUR-231_GG-WUR-183_GG-WUR-225:GG-WUR-133_GG-WUR-241_GG-WUR-075_GG-WUR-182_GG-WUR-179_GG-WUR-202_GG-WUR-189_GG-WUR-186_GG-WUR-177_GG-WUR-071_GG-WUR-208_GG-WUR-206_GG-WUR-076…	210	2|0|0	missense_variant	MODERATE	-	ENSGALG00000004627	ENSGALT00000007372	9/9	-	1204	1204	402	R/C	Cgt/Tgt	-	deleterious_low_confidence(0.03)	-0.496	PTHR10574:SF270&PTHR10574	-	-	YES
9	2680704	C	G	32786.1	216	109	432	82	27	WD	0:0,27:41,0:0	.:.,GG-WUR-203_GG-WUR-075_GG-WUR-179_GG-WUR-186_GG-WUR-211_GG-WUR-208_GG-WUR-076_GG-WUR-196_GG-WUR-201_GG-WUR-194_GG-WUR-178_GG-WUR-188_GG-WUR-218_GG-WUR-209_GG-WUR-070_GG-WUR-199_GG-WUR-207_GG-WUR-195_GG-WUR-176_GG-WUR-223_GG-WUR-204_GG-WUR-080_GG-WUR-191_GG-WUR-229_GG-WUR-231_GG-WUR-079_GG-WUR-190:GG-WUR-205_GG-WUR-133_GG-WUR-241_GG-WUR-235_GG-WUR-228_GG-WUR-220_GG-WUR-189_GG-WUR-221_GG-WUR-177…	-88	50|2|0	splice_donor_variant	HIGH	DUSP28	ENSGALG00000000399	ENSGALT00000000544	-	1/3	-	-	-	-	-	-	-	NA	-	protein tyrosine/serine/threonine phosphatase activity [GO:0008138]; peptidyl-tyrosine dephosphorylation [GO:0035335]	-	YES
9	4671311	G	C	25193.7	249	118	498	88	30	WD	0:0,30:44,0:0	.:.,GG-WUR-205_GG-WUR-203_GG-WUR-235_GG-WUR-182_GG-WUR-220_GG-WUR-202_GG-WUR-186_GG-WUR-177_GG-WUR-138_GG-WUR-076_GG-WUR-081_GG-WUR-196_GG-WUR-197_GG-WUR-178_GG-WUR-188_GG-WUR-218_GG-WUR-210_GG-WUR-077_GG-WUR-207_GG-WUR-195_GG-WUR-176_GG-WUR-233_GG-WUR-193_GG-WUR-204_GG-WUR-137_GG-WUR-184_GG-WUR-227_GG-WUR-231_GG-WUR-190_GG-WUR-212:GG-WUR-133_GG-WUR-241_GG-WUR-075_GG-WUR-179_GG-WUR-189_GG-WUR-192…	1215	55|0|0	missense_variant	MODERATE	PIGX	ENSGALG00000006408	ENSGALT00000010346	6/6	-	659	553	185	H/D	Cat/Gat	-	tolerated(0.07)	-8.233	PTHR28650&Pfam_domain:PF08320&SMART_domains:SM00780	endoplasmic reticulum membrane [GO:0005789]; integral component of membrane [GO:0016021]; GPI anchor biosynthetic process [GO:0006506]	-	YES
9	15674631	C	T	25782	246	146	492	136	10	WD	0:0,10:68,0:0	.:.,GG-WUR-203_GG-WUR-221_GG-WUR-194_GG-WUR-210_GG-WUR-209_GG-WUR-077_GG-WUR-083_GG-WUR-193_GG-WUR-184_GG-WUR-215:GG-WUR-205_GG-WUR-133_GG-WUR-241_GG-WUR-075_GG-WUR-235_GG-WUR-182_GG-WUR-228_GG-WUR-179_GG-WUR-220_GG-WUR-202_GG-WUR-189_GG-WUR-192_GG-WUR-186_GG-WUR-177_GG-WUR-138_GG-WUR-217_GG-WUR-071_GG-WUR-211_GG-WUR-208_GG-WUR-206_GG-WUR-180_GG-WUR-076_GG-WUR-230_GG-WUR-126_GG-WUR-081_GG-WUR-196…	2772	55|27|0	missense_variant	MODERATE	EIF4E2	ENSGALG00000007919	ENSGALT00000012860	4/7	-	365	308	103	R/H	cGt/cAt	-	tolerated(0.05)	-4.152	PTHR11960:SF17&PTHR11960&Pfam_domain:PF01652&3.30.760.10&Superfamily_domains:SSF55418	cytoplasm [GO:0005737]; translation initiation factor activity [GO:0003743]cytoplasm [GO:0005737]; translation initiation factor activity [GO:0003743]cytoplasm [GO:0005737]; translation initiation factor activity [GO:0003743]	mortality/aging,growth/size/body,nervous system,respiratory,homeostasis	YES
10	20032411	C	T	39038.5	223	149	446	148	1	WD	0:0,1:74,0:0	.:.,GG-WUR-077:GG-WUR-205_GG-WUR-133_GG-WUR-203_GG-WUR-075_GG-WUR-235_GG-WUR-182_GG-WUR-228_GG-WUR-179_GG-WUR-220_GG-WUR-202_GG-WUR-189_GG-WUR-192_GG-WUR-221_GG-WUR-186_GG-WUR-177_GG-WUR-138_GG-WUR-217_GG-WUR-071_GG-WUR-211_GG-WUR-208_GG-WUR-206_GG-WUR-180_GG-WUR-076_GG-WUR-230_GG-WUR-126_GG-WUR-081_GG-WUR-196_GG-WUR-201_GG-WUR-198_GG-WUR-132_GG-WUR-197_GG-WUR-178_GG-WUR-188_GG-WUR-218_GG-WUR-082…	3490	49|4|0	splice_donor_variant	HIGH	AP3S2	ENSGALG00000008291	ENSGALT00000065665	-	5/5	-	-	-	-	-	-	-	NA	-	protein transporter activity [GO:0008565]membrane coat [GO:0030117]; protein transporter activity [GO:0008565]; intracellular protein transport [GO:0006886]; vesicle-mediated transport [GO:0016192]	homeostasis,behavior	YES
11	1214340	C	T	11743.3	207	98	414	78	20	WD	0:0,20:39,0:0	.:.,GG-WUR-205_GG-WUR-075_GG-WUR-235_GG-WUR-211_GG-WUR-180_GG-WUR-076_GG-WUR-197_GG-WUR-210_GG-WUR-209_GG-WUR-176_GG-WUR-233_GG-WUR-223_GG-WUR-073_GG-WUR-229_GG-WUR-137_GG-WUR-214_GG-WUR-227_GG-WUR-231_GG-WUR-190_GG-WUR-212:GG-WUR-133_GG-WUR-241_GG-WUR-182_GG-WUR-228_GG-WUR-179_GG-WUR-220_GG-WUR-189_GG-WUR-192_GG-WUR-221_GG-WUR-186_GG-WUR-217_GG-WUR-230_GG-WUR-126_GG-WUR-081_GG-WUR-201_GG-WUR-194…	535	54|7|2	missense_variant	MODERATE	CARMIL2	ENSGALG00000021442	ENSGALT00000034617	33/40	-	3367	3367	1123	R/C	Cgc/Tgc	-	deleterious(0)	-6.38	PTHR24112&PTHR24112:SF32	actin cytoskeleton [GO:0015629]; intermediate filament cytoskeleton [GO:0045111]; lamellipodium [GO:0030027]; macropinosome [GO:0044354]; plasma membrane [GO:0005886]; ruffle [GO:0001726]; phospholipid binding [GO:0005543]; actin filament network formation [GO:0051639]; establishment or maintenance of monopolar cell polarity [GO:0061339]; maintenance of cell polarity [GO:0030011]; negative regula…	endocrine/exocrine,immune,vision/eye,behavior,integument,pigmentation,hematopoietic	YES
11	17603461	G	A	35321.9	246	154	492	152	2	WD	0:0,2:76,0:0	.:.,GG-WUR-230_GG-WUR-084:GG-WUR-205_GG-WUR-133_GG-WUR-203_GG-WUR-241_GG-WUR-075_GG-WUR-235_GG-WUR-182_GG-WUR-228_GG-WUR-179_GG-WUR-220_GG-WUR-202_GG-WUR-189_GG-WUR-192_GG-WUR-221_GG-WUR-186_GG-WUR-177_GG-WUR-138_GG-WUR-217_GG-WUR-071_GG-WUR-211_GG-WUR-208_GG-WUR-206_GG-WUR-180_GG-WUR-076_GG-WUR-126_GG-WUR-081_GG-WUR-196_GG-WUR-201_GG-WUR-198_GG-WUR-194_GG-WUR-132_GG-WUR-197_GG-WUR-178_GG-WUR-188…	1553	64|0|0	missense_variant	MODERATE	MTHFSD	ENSGALG00000033322	ENSGALT00000061374	6/7	-	619	265	89	V/I	Gtt/Att	-	deleterious(0.02)	-0.917	PTHR13017:SF0&PTHR13017&Pfam_domain:PF01812&3.40.50.10420&Superfamily_domains:SSF100950	nucleic acid binding [GO:0003676]; nucleotide binding [GO:0000166]nucleic acid binding [GO:0003676]; nucleotide binding [GO:0000166]nucleic acid binding [GO:0003676]; nucleotide binding [GO:0000166]	-	YES
12	1446359	T	A	32825.8	217	142	434	136	6	WD	0:0,6:68,0:0	.:.,GG-WUR-133_GG-WUR-186_GG-WUR-071_GG-WUR-225_GG-WUR-190_GG-WUR-212:GG-WUR-205_GG-WUR-203_GG-WUR-075_GG-WUR-235_GG-WUR-182_GG-WUR-228_GG-WUR-179_GG-WUR-220_GG-WUR-202_GG-WUR-189_GG-WUR-192_GG-WUR-221_GG-WUR-177_GG-WUR-138_GG-WUR-217_GG-WUR-211_GG-WUR-208_GG-WUR-206_GG-WUR-180_GG-WUR-076_GG-WUR-230_GG-WUR-126_GG-WUR-081_GG-WUR-196_GG-WUR-201_GG-WUR-198_GG-WUR-194_GG-WUR-132_GG-WUR-197_GG-WUR-178…	912	47|12|0	missense_variant	MODERATE	HYAL1	ENSGALG00000000785	ENSGALT00000001138	2/4	-	465	226	76	S/C	Agc/Tgc	-	deleterious(0.04)	-3.407	3.20.20.70&Pfam_domain:PF01630&PIRSF_domain:PIRSF038193&PTHR11769&PTHR11769:SF22&Superfamily_domains:SSF51445	cytoplasmic vesicle [GO:0031410]; extracellular exosome [GO:0070062]; extracellular space [GO:0005615]; hyaluranon cable [GO:0036117]; lysosome [GO:0005764]; hyaluronan synthase activity [GO:0050501]; hyalurononglucosaminidase activity [GO:0004415]; carbohydrate metabolic process [GO:0005975]; cartilage development [GO:0051216]; cellular response to fibroblast growth factor stimulus [GO:0044344];…	liver/biliary,immune,respiratory,skeleton,no abnormal phenotype observed	YES
12	4373067	G	T	21142	245	107	490	72	35	WD	0:0,35:36,0:0	.:.,GG-WUR-228_GG-WUR-202_GG-WUR-192_GG-WUR-186_GG-WUR-138_GG-WUR-217_GG-WUR-208_GG-WUR-126_GG-WUR-081_GG-WUR-196_GG-WUR-201_GG-WUR-197_GG-WUR-178_GG-WUR-218_GG-WUR-210_GG-WUR-209_GG-WUR-185_GG-WUR-070_GG-WUR-125_GG-WUR-224_GG-WUR-233_GG-WUR-223_GG-WUR-193_GG-WUR-073_GG-WUR-072_GG-WUR-204_GG-WUR-184_GG-WUR-213_GG-WUR-227_GG-WUR-215_GG-WUR-183_GG-WUR-225_GG-WUR-079_GG-WUR-190_GG-WUR-232:GG-WUR-205…	460	54|1|2	missense_variant	MODERATE	HRH1	ENSGALG00000004930	ENSGALT00000007887	1/1	-	115	115	39	V/L	Gtg/Ttg	-	deleterious(0)	-2.459	PROSITE_profiles:PS50262&PTHR24249:SF239&PTHR24249&1.20.1070.10&Pfam_domain:PF00001&SMART_domains:SM01381&Superfamily_domains:SSF81321&Prints_domain:PR00237&Transmembrane_helices:TMhelix	cytoplasm [GO:0005737]; integral component of membrane [GO:0016021]; nucleoplasm [GO:0005654]; plasma membrane [GO:0005886]; histamine receptor activity [GO:0004969]; eosinophil chemotaxis [GO:0048245]; inflammatory response [GO:0006954]; memory [GO:0007613]; modulation of synaptic transmission [GO:0050804]; phospholipase C-activating G-protein coupled receptor signaling pathway [GO:0007200]; pos…	growth/size/body,adipose,liver/biliary,immune,homeostasis,behavior,mortality/aging,hematopoietic	YES
13	15754279	A	G	24546.1	226	113	452	84	29	WD	0:0,29:42,0:0	.:.,GG-WUR-133_GG-WUR-203_GG-WUR-235_GG-WUR-228_GG-WUR-202_GG-WUR-186_GG-WUR-177_GG-WUR-217_GG-WUR-071_GG-WUR-211_GG-WUR-076_GG-WUR-230_GG-WUR-081_GG-WUR-198_GG-WUR-194_GG-WUR-197_GG-WUR-082_GG-WUR-222_GG-WUR-078_GG-WUR-224_GG-WUR-176_GG-WUR-193_GG-WUR-073_GG-WUR-072_GG-WUR-214_GG-WUR-084_GG-WUR-213_GG-WUR-183_GG-WUR-212:GG-WUR-205_GG-WUR-241_GG-WUR-075_GG-WUR-182_GG-WUR-179_GG-WUR-220_GG-WUR-189…	371	50|5|0	start_lost	HIGH	PCBD2	ENSGALG00000006367	ENSGALT00000010292	1/4	-	2	1	1	S/P	Tct/Cct	-	deleterious_low_confidence(0.03)	NA	PTHR12599:SF5&PTHR12599	mitochondrion [GO:0005739]; nucleus [GO:0005634]; 4-alpha-hydroxytetrahydrobiopterin dehydratase activity [GO:0008124]; phenylalanine 4-monooxygenase activity [GO:0004505]; positive regulation of transcription, DNA-templated [GO:0045893]; protein heterooligomerization [GO:0051291]; protein homotetramerization [GO:0051289]; tetrahydrobiopterin biosynthetic process [GO:0006729]4-alpha-hydroxytetrah…	-	YES
13	15757810	T	G	30193	247	116	494	86	30	WD	0:0,30:43,0:0	.:.,GG-WUR-133_GG-WUR-203_GG-WUR-235_GG-WUR-228_GG-WUR-202_GG-WUR-186_GG-WUR-177_GG-WUR-217_GG-WUR-071_GG-WUR-211_GG-WUR-076_GG-WUR-230_GG-WUR-081_GG-WUR-198_GG-WUR-194_GG-WUR-197_GG-WUR-082_GG-WUR-222_GG-WUR-078_GG-WUR-224_GG-WUR-176_GG-WUR-233_GG-WUR-193_GG-WUR-073_GG-WUR-072_GG-WUR-214_GG-WUR-084_GG-WUR-213_GG-WUR-183_GG-WUR-212:GG-WUR-205_GG-WUR-241_GG-WUR-075_GG-WUR-182_GG-WUR-179_GG-WUR-220…	576	58|2|0	splice_acceptor_variant	HIGH	TXNDC15	ENSGALG00000039781	ENSGALT00000079413	-	3/3	-	-	-	-	-	-	-	NA	-	cell [GO:0005623]; integral component of membrane [GO:0016021]; cell redox homeostasis [GO:0045454]	-	YES
14	975624	T	C	25790.2	244	136	488	116	20	WD	0:0,20:58,0:0	.:.,GG-WUR-205_GG-WUR-133_GG-WUR-182_GG-WUR-186_GG-WUR-206_GG-WUR-230_GG-WUR-201_GG-WUR-194_GG-WUR-132_GG-WUR-070_GG-WUR-222_GG-WUR-125_GG-WUR-078_GG-WUR-176_GG-WUR-223_GG-WUR-137_GG-WUR-184_GG-WUR-181_GG-WUR-231_GG-WUR-232:GG-WUR-203_GG-WUR-241_GG-WUR-075_GG-WUR-235_GG-WUR-228_GG-WUR-179_GG-WUR-220_GG-WUR-202_GG-WUR-189_GG-WUR-192_GG-WUR-221_GG-WUR-177_GG-WUR-138_GG-WUR-217_GG-WUR-071_GG-WUR-211…	1121	63|1|0	missense_variant	MODERATE	EIF2AK1	ENSGALG00000003391	ENSGALT00000005357	14/15	-	1883	1577	526	I/T	aTc/aCc	-	deleterious(0.01)	-4.172	PROSITE_profiles:PS50011&PTHR11042:SF98&PTHR11042&1.10.510.10&Pfam_domain:PF00069&SMART_domains:SM00220&Superfamily_domains:SSF56112	cytoplasm [GO:0005737]; ATP binding [GO:0005524]; eukaryotic translation initiation factor 2alpha kinase activity [GO:0004694]; heme binding [GO:0020037]; acute inflammatory response [GO:0002526]; iron ion homeostasis [GO:0055072]; macrophage differentiation [GO:0030225]; negative regulation of cell proliferation [GO:0008285]; negative regulation of hemoglobin biosynthetic process [GO:0046986]; p…	immune,hematopoietic,cellular,mortality/aging,homeostasis,cardiovascular	YES
14	981856	A	G	26980.8	243	132	486	112	20	WD	0:0,20:56,0:0	.:.,GG-WUR-205_GG-WUR-133_GG-WUR-182_GG-WUR-186_GG-WUR-206_GG-WUR-230_GG-WUR-201_GG-WUR-194_GG-WUR-132_GG-WUR-070_GG-WUR-222_GG-WUR-125_GG-WUR-078_GG-WUR-176_GG-WUR-223_GG-WUR-137_GG-WUR-184_GG-WUR-181_GG-WUR-231_GG-WUR-232:GG-WUR-203_GG-WUR-241_GG-WUR-075_GG-WUR-235_GG-WUR-228_GG-WUR-179_GG-WUR-220_GG-WUR-202_GG-WUR-189_GG-WUR-192_GG-WUR-221_GG-WUR-177_GG-WUR-138_GG-WUR-217_GG-WUR-071_GG-WUR-211…	797	59|18|0	missense_variant	MODERATE	PMS2	ENSGALG00000003430	ENSGALT00000005427	5/19	-	566	530	177	K/R	aAa/aGa	1	tolerated(0.06)	-2.525	PTHR10073:SF39&PTHR10073&TIGRFAM_domain:TIGR00585&3.30.565.10&Superfamily_domains:SSF55874	MutLalpha complex [GO:0032389]; ATP binding [GO:0005524]; ATPase activity [GO:0016887]; endonuclease activity [GO:0004519]; mismatched DNA binding [GO:0030983]; single-stranded DNA binding [GO:0003697]; mismatch repair [GO:0006298]; mitotic G2 DNA damage checkpoint [GO:0007095]; positive regulation of B cell proliferation [GO:0030890]; somatic hypermutation of immunoglobulin genes [GO:0016446]mis…	reproductive,endocrine/exocrine,liver/biliary,immune,neoplasm,hematopoietic,cellular,mortality/aging,homeostasis	YES
14	1993461	G	A	25752.8	243	133	486	112	21	WD	0:0,21:56,0:0	.:.,GG-WUR-205_GG-WUR-133_GG-WUR-182_GG-WUR-186_GG-WUR-206_GG-WUR-230_GG-WUR-201_GG-WUR-194_GG-WUR-132_GG-WUR-188_GG-WUR-070_GG-WUR-222_GG-WUR-125_GG-WUR-078_GG-WUR-176_GG-WUR-223_GG-WUR-137_GG-WUR-184_GG-WUR-181_GG-WUR-231_GG-WUR-232:GG-WUR-203_GG-WUR-241_GG-WUR-075_GG-WUR-235_GG-WUR-228_GG-WUR-179_GG-WUR-220_GG-WUR-202_GG-WUR-189_GG-WUR-192_GG-WUR-221_GG-WUR-177_GG-WUR-138_GG-WUR-217_GG-WUR-071…	1171	48|19|0	missense_variant	MODERATE	PDGF-A	ENSGALG00000003642	ENSGALT00000034276	6/6	-	607	607	203	R/W	Cgg/Tgg	-	tolerated(0.07)	-2.604	Low_complexity_(Seg):seg&PTHR11633&PTHR11633:SF3	membrane [GO:0016020]; gonad development [GO:0008406]cell surface [GO:0009986]; extracellular space [GO:0005615]; membrane [GO:0016020]; negative chemotaxis [GO:0050919]; negative regulation of phosphatidylinositol biosynthetic process [GO:0010512]; negative regulation of platelet activation [GO:0010544]; positive regulation of DNA replication [GO:0045740]; positive regulation of ERK1 and ERK2 ca…	respiratory,reproductive,growth/size/body,mortality/aging,cardiovascular,digestive/alimentary	YES
14	12755156	C	T	42975.5	231	149	462	148	1	WD	0:0,1:74,0:0	.:.,GG-WUR-185:GG-WUR-205_GG-WUR-133_GG-WUR-203_GG-WUR-241_GG-WUR-075_GG-WUR-235_GG-WUR-182_GG-WUR-228_GG-WUR-179_GG-WUR-220_GG-WUR-202_GG-WUR-189_GG-WUR-192_GG-WUR-221_GG-WUR-186_GG-WUR-177_GG-WUR-138_GG-WUR-217_GG-WUR-071_GG-WUR-211_GG-WUR-208_GG-WUR-206_GG-WUR-180_GG-WUR-076_GG-WUR-230_GG-WUR-126_GG-WUR-081_GG-WUR-196_GG-WUR-201_GG-WUR-198_GG-WUR-194_GG-WUR-132_GG-WUR-197_GG-WUR-178_GG-WUR-188…	1805	58|11|0	missense_variant	MODERATE	PAM16	ENSGALG00000038325	ENSGALT00000067660	19/28	-	2153	1807	603	V/M	Gtg/Atg	-	deleterious(0.03)	1	PROSITE_profiles:PS50294&PROSITE_profiles:PS50082&PTHR10856&PTHR10856:SF20&Pfam_domain:PF00400&2.130.10.10&SMART_domains:SM00320&Superfamily_domains:SSF50998	mitochondrial inner membrane presequence translocase complex [GO:0005744]; protein import into mitochondrial matrix [GO:0030150]	mortality/aging,homeostasis,cellular	YES
14	12803647	C	T	31980.8	240	153	480	152	1	WD	0:0,1:76,0:0	.:.,GG-WUR-185:GG-WUR-205_GG-WUR-133_GG-WUR-203_GG-WUR-241_GG-WUR-075_GG-WUR-235_GG-WUR-182_GG-WUR-228_GG-WUR-179_GG-WUR-220_GG-WUR-202_GG-WUR-189_GG-WUR-192_GG-WUR-221_GG-WUR-186_GG-WUR-177_GG-WUR-138_GG-WUR-217_GG-WUR-071_GG-WUR-211_GG-WUR-208_GG-WUR-206_GG-WUR-180_GG-WUR-076_GG-WUR-230_GG-WUR-126_GG-WUR-081_GG-WUR-196_GG-WUR-201_GG-WUR-198_GG-WUR-194_GG-WUR-132_GG-WUR-197_GG-WUR-178_GG-WUR-188…	2372	45|6|0	missense_variant	MODERATE	NMRAL1	ENSGALG00000029820	ENSGALT00000069293	5/6	-	607	607	203	A/T	Gcc/Acc	-	deleterious(0.05)	-0.328	3.40.50.720&Pfam_domain:PF05368&PTHR14194&PTHR14194:SF74&Superfamily_domains:SSF51735	-	homeostasis	YES
15	643681	C	T	30176.3	248	147	496	138	9	WD	0:0,9:69,0:0	.:.,GG-WUR-182_GG-WUR-230_GG-WUR-198_GG-WUR-199_GG-WUR-078_GG-WUR-195_GG-WUR-176_GG-WUR-073_GG-WUR-212:GG-WUR-205_GG-WUR-133_GG-WUR-203_GG-WUR-241_GG-WUR-075_GG-WUR-235_GG-WUR-228_GG-WUR-179_GG-WUR-220_GG-WUR-202_GG-WUR-189_GG-WUR-192_GG-WUR-221_GG-WUR-186_GG-WUR-177_GG-WUR-138_GG-WUR-217_GG-WUR-071_GG-WUR-211_GG-WUR-208_GG-WUR-206_GG-WUR-180_GG-WUR-076_GG-WUR-126_GG-WUR-081_GG-WUR-196_GG-WUR-201…	1510	61|15|0	missense_variant	MODERATE	HIRA	ENSGALG00000033598	ENSGALT00000077327	15/25	-	1741	1741	581	A/T	Gcc/Acc	-	tolerated(0.12)	-2.863	-	nucleus [GO:0005634]; chromatin organization [GO:0006325]; regulation of transcription, DNA-templated [GO:0006355]; transcription, DNA-templated [GO:0006351]	embryo,cellular,craniofacial,endocrine/exocrine,immune,homeostasis,behavior,mortality/aging,nervous system,skeleton,growth/size/body,hematopoietic,cardiovascular	YES
15	1646219	C	G	31280.2	246	149	492	142	7	WD	0:0,7:71,0:0	.:.,GG-WUR-182_GG-WUR-198_GG-WUR-199_GG-WUR-078_GG-WUR-195_GG-WUR-073_GG-WUR-212:GG-WUR-205_GG-WUR-133_GG-WUR-203_GG-WUR-241_GG-WUR-075_GG-WUR-235_GG-WUR-228_GG-WUR-179_GG-WUR-220_GG-WUR-202_GG-WUR-189_GG-WUR-192_GG-WUR-221_GG-WUR-186_GG-WUR-177_GG-WUR-138_GG-WUR-217_GG-WUR-071_GG-WUR-211_GG-WUR-208_GG-WUR-206_GG-WUR-180_GG-WUR-076_GG-WUR-230_GG-WUR-126_GG-WUR-081_GG-WUR-196_GG-WUR-201_GG-WUR-194…	822	54|6|0	missense_variant	MODERATE	FBRSL1	ENSGALG00000002205	ENSGALT00000053055	1/18	-	23	23	8	S/T	aGt/aCt	-	deleterious_low_confidence(0)	-0.433	-	poly(A) RNA binding [GO:0044822]	-	YES
15	6498295	G	A	18561.2	241	131	482	114	17	WD	0:0,17:57,0:0	.:.,GG-WUR-235_GG-WUR-228_GG-WUR-202_GG-WUR-192_GG-WUR-081_GG-WUR-132_GG-WUR-178_GG-WUR-210_GG-WUR-185_GG-WUR-070_GG-WUR-207_GG-WUR-224_GG-WUR-184_GG-WUR-213_GG-WUR-231_GG-WUR-183_GG-WUR-079:GG-WUR-205_GG-WUR-133_GG-WUR-203_GG-WUR-241_GG-WUR-075_GG-WUR-179_GG-WUR-220_GG-WUR-189_GG-WUR-221_GG-WUR-186_GG-WUR-177_GG-WUR-138_GG-WUR-217_GG-WUR-071_GG-WUR-211_GG-WUR-208_GG-WUR-206_GG-WUR-180_GG-WUR-076…	58	51|20|0	splice_donor_variant	HIGH	RPH3A	ENSGALG00000004840	ENSGALT00000059683	-	8/18	-	-	-	-	-	-	-	0.27	-	intracellular [GO:0005622]; plasma membrane [GO:0005886]; presynapse [GO:0098793]; calcium ion binding [GO:0005509]; calcium-dependent phospholipid binding [GO:0005544]; clathrin binding [GO:0030276]; syntaxin binding [GO:0019905]; calcium ion-regulated exocytosis of neurotransmitter [GO:0048791]; intracellular protein transport [GO:0006886]; regulation of calcium ion-dependent exocytosis [GO:001…	no abnormal phenotype observed	YES
15	7763443	C	T	17778.4	227	139	454	130	9	WD	0:0,9:65,0:0	.:.,GG-WUR-241_GG-WUR-220_GG-WUR-201_GG-WUR-198_GG-WUR-132_GG-WUR-197_GG-WUR-078_GG-WUR-224_GG-WUR-233:GG-WUR-205_GG-WUR-133_GG-WUR-203_GG-WUR-075_GG-WUR-235_GG-WUR-182_GG-WUR-228_GG-WUR-179_GG-WUR-202_GG-WUR-189_GG-WUR-192_GG-WUR-221_GG-WUR-186_GG-WUR-177_GG-WUR-217_GG-WUR-071_GG-WUR-211_GG-WUR-208_GG-WUR-206_GG-WUR-180_GG-WUR-076_GG-WUR-126_GG-WUR-081_GG-WUR-196_GG-WUR-194_GG-WUR-178_GG-WUR-188…	2940	64|4|0	missense_variant	MODERATE	XBP1	ENSGALG00000005796	ENSGALT00000009310	3/5	-	469	404	135	C/Y	tGc/tAc	-	deleterious(0.05)	-0.948	PTHR13301&PTHR13301:SF78	endoplasmic reticulum [GO:0005783]; integral component of membrane [GO:0016021]; nucleus [GO:0005634]; core promoter binding [GO:0001047]; enhancer sequence-specific DNA binding [GO:0001158]; RNA polymerase II regulatory region sequence-specific DNA binding [GO:0000977]; RNA polymerase II transcription factor activity, sequence-specific DNA binding [GO:0000981]; adipose tissue development [GO:006…	embryo,nervous system,behavior,growth/size/body,digestive/alimentary,endocrine/exocrine,liver/biliary,immune,vision/eye,hematopoietic,cellular,mortality/aging,integument,muscle,skeleton,homeostasis,cardiovascular	NO
15	9110457	G	A	31826.5	249	156	498	156	0	WD	0:0,0:78,0:0	.:.,.:GG-WUR-205_GG-WUR-133_GG-WUR-203_GG-WUR-241_GG-WUR-075_GG-WUR-235_GG-WUR-182_GG-WUR-228_GG-WUR-179_GG-WUR-220_GG-WUR-202_GG-WUR-189_GG-WUR-192_GG-WUR-221_GG-WUR-186_GG-WUR-177_GG-WUR-138_GG-WUR-217_GG-WUR-071_GG-WUR-211_GG-WUR-208_GG-WUR-206_GG-WUR-180_GG-WUR-076_GG-WUR-230_GG-WUR-126_GG-WUR-081_GG-WUR-196_GG-WUR-201_GG-WUR-198_GG-WUR-194_GG-WUR-132_GG-WUR-197_GG-WUR-178_GG-WUR-188_GG-WUR-2…	707	60|3|5	missense_variant	MODERATE	LIMK2	ENSGALG00000006950	ENSGALT00000011263	6/16	-	719	637	213	R/C	Cgt/Tgt	-	deleterious(0.01)	-5.558	PROSITE_profiles:PS50106&PTHR23257&PTHR23257:SF398&2.30.42.10&Pfam_domain:PF00595&SMART_domains:SM00228&Superfamily_domains:SSF50156	cis-Golgi network [GO:0005801]; cytoplasm [GO:0005737]; nucleus [GO:0005634]; ATP binding [GO:0005524]; protein serine/threonine kinase activity [GO:0004674]; signal transducer activity [GO:0004871]; zinc ion binding [GO:0008270]; intracellular signal transduction [GO:0035556]; protein phosphorylation [GO:0006468]; spermatogenesis [GO:0007283]	behavior,reproductive,growth/size/body,endocrine/exocrine,limbs/digits/tail,immune,renal/urinary,vision/eye,cellular,skeleton,craniofacial,cardiovascular	YES
17	8805339	T	C	17461.2	230	118	460	96	22	WD	0:0,22:48,0:0	.:.,GG-WUR-228_GG-WUR-179_GG-WUR-189_GG-WUR-186_GG-WUR-138_GG-WUR-211_GG-WUR-180_GG-WUR-230_GG-WUR-196_GG-WUR-198_GG-WUR-194_GG-WUR-210_GG-WUR-185_GG-WUR-070_GG-WUR-078_GG-WUR-200_GG-WUR-083_GG-WUR-176_GG-WUR-219_GG-WUR-184_GG-WUR-225_GG-WUR-212:GG-WUR-205_GG-WUR-133_GG-WUR-203_GG-WUR-241_GG-WUR-075_GG-WUR-235_GG-WUR-182_GG-WUR-220_GG-WUR-202_GG-WUR-192_GG-WUR-221_GG-WUR-177_GG-WUR-217_GG-WUR-071…	1743	56|7|4	missense_variant	MODERATE	C5	ENSGALG00000001565	ENSGALT00000002379	40/41	-	4816	4816	1606	T/A	Acc/Gcc	-	deleterious(0.03)	1	Pfam_domain:PF01759&PROSITE_profiles:PS50189&SMART_domains:SM00643&Superfamily_domains:SSF50242	extracellular space [GO:0005615]; endopeptidase inhibitor activity [GO:0004866]extracellular exosome [GO:0070062]; extracellular space [GO:0005615]; endopeptidase inhibitor activity [GO:0004866]; negative regulation of macrophage chemotaxis [GO:0010760]; positive regulation of angiogenesis [GO:0045766]; positive regulation of chemokine secretion [GO:0090197]; positive regulation of vascular endot…	embryo,skeleton,growth/size/body,endocrine/exocrine,liver/biliary,integument,homeostasis,cardiovascular,immune,limbs/digits/tail,hearing/vestibular/ear,neoplasm,mortality/aging,nervous system,craniofacial,vision/eye,cellular,respiratory,reproductive,adipose,renal/urinary,behavior,muscle,hematopoietic,digestive/alimentary	YES
18	2196343	G	A	22849.1	242	116	484	88	28	WD	0:0,28:44,0:0	.:.,GG-WUR-133_GG-WUR-203_GG-WUR-179_GG-WUR-202_GG-WUR-189_GG-WUR-186_GG-WUR-217_GG-WUR-208_GG-WUR-206_GG-WUR-126_GG-WUR-081_GG-WUR-196_GG-WUR-082_GG-WUR-185_GG-WUR-222_GG-WUR-077_GG-WUR-083_GG-WUR-176_GG-WUR-233_GG-WUR-223_GG-WUR-214_GG-WUR-084_GG-WUR-184_GG-WUR-215_GG-WUR-231_GG-WUR-225_GG-WUR-079_GG-WUR-190:GG-WUR-205_GG-WUR-075_GG-WUR-235_GG-WUR-220_GG-WUR-221_GG-WUR-177_GG-WUR-138_GG-WUR-071…	619	63|0|0	missense_variant	MODERATE	STX8	ENSGALG00000001238	ENSGALT00000049705	6/6	-	763	746	249	T/M	aCg/aTg	-	deleterious_low_confidence(0)	-1.281	-	integral component of membrane [GO:0016021]integral component of membrane [GO:0016021]endomembrane system [GO:0012505]; integral component of membrane [GO:0016021]; SNARE complex [GO:0031201]; SNAP receptor activity [GO:0005484]; SNARE binding [GO:0000149]; intracellular protein transport [GO:0006886]; vesicle docking [GO:0048278]; vesicle fusion [GO:0006906]integral component of membrane [GO:001…	homeostasis,hematopoietic,skeleton	YES
19	3337783	A	G	26766.7	248	131	496	108	23	WD	0:0,23:54,0:0	.:.,GG-WUR-133_GG-WUR-235_GG-WUR-220_GG-WUR-202_GG-WUR-189_GG-WUR-192_GG-WUR-177_GG-WUR-211_GG-WUR-198_GG-WUR-197_GG-WUR-218_GG-WUR-210_GG-WUR-209_GG-WUR-185_GG-WUR-070_GG-WUR-125_GG-WUR-207_GG-WUR-176_GG-WUR-073_GG-WUR-214_GG-WUR-219_GG-WUR-231_GG-WUR-212:GG-WUR-205_GG-WUR-203_GG-WUR-241_GG-WUR-075_GG-WUR-182_GG-WUR-228_GG-WUR-179_GG-WUR-221_GG-WUR-186_GG-WUR-138_GG-WUR-217_GG-WUR-071_GG-WUR-208…	1120	49|24|2	missense_variant	MODERATE	CAMKK1	ENSGALG00000001617	ENSGALT00000002468	3/17	-	437	77	26	E/G	gAg/gGg	-	deleterious_low_confidence(0)	-2.673	PTHR24347&PTHR24347:SF232	cytoplasm [GO:0005737]; nucleus [GO:0005634]; ATP binding [GO:0005524]; calmodulin binding [GO:0005516]; calmodulin-dependent protein kinase activity [GO:0004683]; intracellular signal transduction [GO:0035556]; peptidyl-serine phosphorylation [GO:0018105]; peptidyl-threonine phosphorylation [GO:0018107]; positive regulation of protein kinase activity [GO:0045860]	behavior	YES
19	4097395	G	A	17873.2	237	136	474	130	6	WD	0:0,6:65,0:0	.:.,GG-WUR-205_GG-WUR-235_GG-WUR-201_GG-WUR-198_GG-WUR-197_GG-WUR-137:GG-WUR-133_GG-WUR-241_GG-WUR-075_GG-WUR-182_GG-WUR-228_GG-WUR-179_GG-WUR-220_GG-WUR-202_GG-WUR-189_GG-WUR-192_GG-WUR-221_GG-WUR-186_GG-WUR-177_GG-WUR-138_GG-WUR-217_GG-WUR-071_GG-WUR-211_GG-WUR-208_GG-WUR-180_GG-WUR-076_GG-WUR-230_GG-WUR-126_GG-WUR-194_GG-WUR-132_GG-WUR-188_GG-WUR-218_GG-WUR-082_GG-WUR-210_GG-WUR-209_GG-WUR-185…	360	58|3|0	missense_variant	MODERATE	SH2B2	ENSGALG00000001828	ENSGALT00000002828	10/10	-	1781	1781	594	R/H	cGc/cAc	-	deleterious(0)	-2.084	PTHR10872:SF4&PTHR10872	intracellular [GO:0005622]; signal transducer activity [GO:0004871]; signaling adaptor activity [GO:0035591]; intracellular signal transduction [GO:0035556]intracellular [GO:0005622]; signal transducer activity [GO:0004871]; signaling adaptor activity [GO:0035591]; intracellular signal transduction [GO:0035556]intracellular [GO:0005622]; signal transducer activity [GO:0004871]; signaling adaptor …	immune,homeostasis,hematopoietic	NO
19	6503351	C	T	20975.8	241	106	482	68	38	WD	0:0,38:34,0:0	.:.,GG-WUR-205_GG-WUR-133_GG-WUR-203_GG-WUR-228_GG-WUR-202_GG-WUR-221_GG-WUR-186_GG-WUR-177_GG-WUR-138_GG-WUR-217_GG-WUR-071_GG-WUR-206_GG-WUR-230_GG-WUR-196_GG-WUR-194_GG-WUR-132_GG-WUR-178_GG-WUR-218_GG-WUR-209_GG-WUR-185_GG-WUR-125_GG-WUR-077_GG-WUR-224_GG-WUR-223_GG-WUR-193_GG-WUR-072_GG-WUR-187_GG-WUR-080_GG-WUR-229_GG-WUR-137_GG-WUR-214_GG-WUR-219_GG-WUR-184_GG-WUR-181_GG-WUR-215_GG-WUR-231…	276	58|14|2	stop_gained	HIGH	NCOR1	ENSGALG00000004477	ENSGALT00000050790	5/5	-	644	644	1900-08-02	W/*	tGg/tAg	-	-	NA	-	membrane [GO:0016020]; Sin3 complex [GO:0016580]; spindle microtubule [GO:0005876]; transcriptional repressor complex [GO:0017053]; DNA binding [GO:0003677]; ligand-dependent nuclear receptor binding [GO:0016922]; thyroid hormone receptor binding [GO:0046966]; transcription corepressor activity [GO:0003714]; negative regulation of JNK cascade [GO:0046329]; negative regulation of production of miR…	embryo,nervous system,cellular,growth/size/body,adipose,endocrine/exocrine,liver/biliary,immune,hematopoietic,behavior,mortality/aging,integument,muscle,homeostasis,cardiovascular	YES
24	4186093	C	T	22656.5	240	136	480	118	18	WD	0:0,18:59,0:0	.:.,GG-WUR-220_GG-WUR-189_GG-WUR-221_GG-WUR-208_GG-WUR-201_GG-WUR-198_GG-WUR-194_GG-WUR-197_GG-WUR-188_GG-WUR-185_GG-WUR-125_GG-WUR-176_GG-WUR-204_GG-WUR-084_GG-WUR-213_GG-WUR-181_GG-WUR-079_GG-WUR-232:GG-WUR-205_GG-WUR-133_GG-WUR-203_GG-WUR-241_GG-WUR-075_GG-WUR-235_GG-WUR-182_GG-WUR-228_GG-WUR-179_GG-WUR-202_GG-WUR-192_GG-WUR-186_GG-WUR-177_GG-WUR-138_GG-WUR-217_GG-WUR-071_GG-WUR-211_GG-WUR-206…	1946	62|4|2	missense_variant	MODERATE	USP2	ENSGALG00000006755	ENSGALT00000063235	13/13	-	1454	956	319	P/L	cCa/cTa	-	deleterious_low_confidence(0.05)	-0.456	PROSITE_profiles:PS50235	thiol-dependent ubiquitinyl hydrolase activity [GO:0036459]; protein deubiquitination [GO:0016579]; ubiquitin-dependent protein catabolic process [GO:0006511]thiol-dependent ubiquitinyl hydrolase activity [GO:0036459]; protein deubiquitination [GO:0016579]; ubiquitin-dependent protein catabolic process [GO:0006511]thiol-dependent ubiquitinyl hydrolase activity [GO:0036459]; protein deubiquitinati…	behavior,reproductive,endocrine/exocrine,cellular,no abnormal phenotype observed,hematopoietic	YES
25	1283465	TA	CG	22747	230	146	460	144	2	WD	0:0,2:72,0:0	.:.,GG-WUR-180_GG-WUR-077:GG-WUR-205_GG-WUR-133_GG-WUR-203_GG-WUR-241_GG-WUR-075_GG-WUR-235_GG-WUR-228_GG-WUR-179_GG-WUR-220_GG-WUR-202_GG-WUR-189_GG-WUR-192_GG-WUR-221_GG-WUR-177_GG-WUR-138_GG-WUR-217_GG-WUR-071_GG-WUR-211_GG-WUR-208_GG-WUR-206_GG-WUR-076_GG-WUR-230_GG-WUR-126_GG-WUR-081_GG-WUR-196_GG-WUR-201_GG-WUR-198_GG-WUR-194_GG-WUR-132_GG-WUR-197_GG-WUR-178_GG-WUR-188_GG-WUR-218_GG-WUR-082…	5211	38|0|0	missense_variant	MODERATE	-	ENSGALG00000035856	ENSGALT00000081507	3/4	-	654-655	634-635	212	Y/R	TAc/CGc	-	deleterious(0)	-4.774	PTHR12080	-	-	NO
26	27988	C	T	25142.1	240	125	480	98	27	WD	0:0,27:49,0:0	.:.,GG-WUR-205_GG-WUR-075_GG-WUR-235_GG-WUR-179_GG-WUR-220_GG-WUR-217_GG-WUR-208_GG-WUR-206_GG-WUR-180_GG-WUR-230_GG-WUR-126_GG-WUR-196_GG-WUR-198_GG-WUR-194_GG-WUR-132_GG-WUR-197_GG-WUR-210_GG-WUR-078_GG-WUR-224_GG-WUR-195_GG-WUR-223_GG-WUR-187_GG-WUR-204_GG-WUR-137_GG-WUR-231_GG-WUR-190_GG-WUR-232:GG-WUR-133_GG-WUR-203_GG-WUR-241_GG-WUR-182_GG-WUR-228_GG-WUR-202_GG-WUR-189_GG-WUR-192_GG-WUR-221…	2551	46|2|0	missense_variant	MODERATE	MICAL1	ENSGALG00000032190	ENSGALT00000068928	12/24	-	1692	1691	564	A/V	gCt/gTt	-	deleterious(0.01)	-0.936	PROSITE_profiles:PS50021&PTHR11915&1.10.418.10&Pfam_domain:PF00307&SMART_domains:SM00033&Superfamily_domains:SSF47576	FAD binding [GO:0071949]; oxidoreductase activity [GO:0016491]; zinc ion binding [GO:0008270]cytoplasm [GO:0005737]; FAD binding [GO:0071949]; oxidoreductase activity, acting on paired donors, with incorporation or reduction of molecular oxygen, NAD(P)H as one donor, and incorporation of one atom of oxygen [GO:0016709]; zinc ion binding [GO:0008270]; actin filament depolymerization [GO:0030042]; …	-	YES
26	43779	C	A	20804.3	247	120	494	94	26	WD	0:0,26:47,0:0	.:.,GG-WUR-205_GG-WUR-075_GG-WUR-235_GG-WUR-179_GG-WUR-220_GG-WUR-217_GG-WUR-208_GG-WUR-206_GG-WUR-180_GG-WUR-230_GG-WUR-126_GG-WUR-196_GG-WUR-198_GG-WUR-194_GG-WUR-132_GG-WUR-197_GG-WUR-210_GG-WUR-078_GG-WUR-224_GG-WUR-195_GG-WUR-223_GG-WUR-187_GG-WUR-204_GG-WUR-137_GG-WUR-231_GG-WUR-190:GG-WUR-133_GG-WUR-203_GG-WUR-241_GG-WUR-182_GG-WUR-228_GG-WUR-202_GG-WUR-189_GG-WUR-192_GG-WUR-221_GG-WUR-186…	203	50|21|0	missense_variant	MODERATE	TEAD3	ENSGALG00000043513	ENSGALT00000073579	1/10	-	266	266	89	G/V	gGg/gTg	-	deleterious_low_confidence(0)	-0.467	-	nucleus [GO:0005634]; DNA binding [GO:0003677]; transcription factor activity, sequence-specific DNA binding [GO:0003700]; hippo signaling [GO:0035329]; positive regulation of transcription from RNA polymerase II promoter [GO:0045944]; transcription, DNA-templated [GO:0006351]nucleus [GO:0005634]; DNA binding [GO:0003677]; transcription factor activity, sequence-specific DNA binding [GO:0003700];…	immune,hematopoietic	YES
26	96570	T	C	11735	215	98	430	76	22	WD	0:0,22:38,0:0	.:.,GG-WUR-205_GG-WUR-075_GG-WUR-235_GG-WUR-179_GG-WUR-217_GG-WUR-206_GG-WUR-180_GG-WUR-126_GG-WUR-196_GG-WUR-198_GG-WUR-194_GG-WUR-132_GG-WUR-197_GG-WUR-210_GG-WUR-224_GG-WUR-195_GG-WUR-223_GG-WUR-204_GG-WUR-137_GG-WUR-231_GG-WUR-190_GG-WUR-232:GG-WUR-133_GG-WUR-203_GG-WUR-241_GG-WUR-182_GG-WUR-228_GG-WUR-189_GG-WUR-192_GG-WUR-221_GG-WUR-186_GG-WUR-177_GG-WUR-138_GG-WUR-071_GG-WUR-211_GG-WUR-076…	323	48|26|0	splice_donor_variant	HIGH	LHFPL5	ENSGALG00000039170	ENSGALT00000050484	-	3/3	-	-	-	-	-	-	-	NA	-	integral component of membrane [GO:0016021]	hearing/vestibular/ear,nervous system,behavior	YES
26	279131	C	T	31556.4	219	121	438	96	25	WD	0:0,25:48,0:0	.:.,GG-WUR-205_GG-WUR-075_GG-WUR-235_GG-WUR-179_GG-WUR-220_GG-WUR-217_GG-WUR-208_GG-WUR-206_GG-WUR-180_GG-WUR-230_GG-WUR-126_GG-WUR-196_GG-WUR-198_GG-WUR-132_GG-WUR-197_GG-WUR-210_GG-WUR-078_GG-WUR-224_GG-WUR-195_GG-WUR-223_GG-WUR-187_GG-WUR-204_GG-WUR-137_GG-WUR-231_GG-WUR-190:GG-WUR-133_GG-WUR-203_GG-WUR-182_GG-WUR-228_GG-WUR-202_GG-WUR-189_GG-WUR-192_GG-WUR-221_GG-WUR-186_GG-WUR-177_GG-WUR-138…	1637	50|22|0	missense_variant	MODERATE	CACNA1S	ENSGALG00000037744	ENSGALT00000048794	45/45	-	5656	5656	1886	R/C	Cgc/Tgc	-	deleterious_low_confidence(0)	-1.255	-	voltage-gated calcium channel complex [GO:0005891]; voltage-gated calcium channel activity [GO:0005245]voltage-gated calcium channel complex [GO:0005891]; voltage-gated calcium channel activity [GO:0005245]	nervous system,skeleton,craniofacial,adipose,limbs/digits/tail,behavior,mortality/aging,integument,muscle,cellular,growth/size/body,homeostasis,digestive/alimentary	YES
28	1561616	A	T	21253.3	221	106	442	74	32	WD	0:0,32:37,0:0	.:.,GG-WUR-205_GG-WUR-133_GG-WUR-235_GG-WUR-220_GG-WUR-221_GG-WUR-186_GG-WUR-138_GG-WUR-217_GG-WUR-076_GG-WUR-126_GG-WUR-198_GG-WUR-132_GG-WUR-178_GG-WUR-188_GG-WUR-210_GG-WUR-185_GG-WUR-077_GG-WUR-207_GG-WUR-200_GG-WUR-083_GG-WUR-223_GG-WUR-193_GG-WUR-072_GG-WUR-187_GG-WUR-204_GG-WUR-137_GG-WUR-219_GG-WUR-184_GG-WUR-215_GG-WUR-231_GG-WUR-183_GG-WUR-225:GG-WUR-203_GG-WUR-075_GG-WUR-228_GG-WUR-179…	587	57|12|0	missense_variant	MODERATE	DUS3L	ENSGALG00000001800	ENSGALT00000064216	1/10	-	280	280	94	R/W	Agg/Tgg	-	deleterious(0)	-1.65	-	flavin adenine dinucleotide binding [GO:0050660]; metal ion binding [GO:0046872]; tRNA dihydrouridine synthase activity [GO:0017150]cytosol [GO:0005829]; flavin adenine dinucleotide binding [GO:0050660]; tRNA dihydrouridine synthase activity [GO:0017150]	-	YES
28	2293520	C	G	22396.4	238	105	476	74	31	WD	0:0,31:37,0:0	.:.,GG-WUR-203_GG-WUR-075_GG-WUR-235_GG-WUR-228_GG-WUR-179_GG-WUR-192_GG-WUR-186_GG-WUR-217_GG-WUR-230_GG-WUR-196_GG-WUR-198_GG-WUR-132_GG-WUR-197_GG-WUR-188_GG-WUR-209_GG-WUR-185_GG-WUR-070_GG-WUR-222_GG-WUR-125_GG-WUR-078_GG-WUR-077_GG-WUR-207_GG-WUR-083_GG-WUR-195_GG-WUR-223_GG-WUR-072_GG-WUR-204_GG-WUR-213_GG-WUR-231_GG-WUR-225_GG-WUR-190:GG-WUR-205_GG-WUR-133_GG-WUR-182_GG-WUR-220_GG-WUR-202…	229	51|10|0	missense_variant	MODERATE	ATP8B3	ENSGALG00000001084	ENSGALT00000041186	14/22	-	1718	1718	573	T/R	aCg/aGg	-	tolerated(0.24)	-2.783	PTHR24092&PTHR24092:SF78&3.40.50.1000&TIGRFAM_domain:TIGR01652	acrosomal vesicle [GO:0001669]; Golgi apparatus [GO:0005794]; integral component of membrane [GO:0016021]; plasma membrane [GO:0005886]; ATP binding [GO:0005524]; magnesium ion binding [GO:0000287]; phospholipid-translocating ATPase activity [GO:0004012]; binding of sperm to zona pellucida [GO:0007339]; Golgi organization [GO:0007030]	reproductive,cellular	YES

## Sheet: TableS3
Table S1: high frequency deleterious variation in W1 line
CHROM	POS	REF	ALT	QUAL	Number_of_samples	Allele_count	Allele_number	Allele_count_homozygote	Allele_count_heterozygote	Breed	Allele_count_breed(WA_het:WA_hom,WD_het:WD_hom,W1_het:W1_hom)	tAllele_count_samples(WA_het:WA_hom,WD_het:WD_hom,W1_het:W1_hom)	RNA_seq_coverage(ensembl)	Ensembl_Orthology(one2one|one2many|many2many)	Consequence	IMPACT	SYMBOL	Gene	Transcript	EXON_NR	INTRON_NR	cDNA_position	CDS_position	Protein_position	Amino_acids	Codons	Phenotype	SIFT	Provean	Domains	GO	Phenotype	dbSNP
1	6706080	C	T	40611.8	245	155	490	118	37	W1	0:0,0:0,37:59	.:.,.:.,GG-WUR-106_GG-WUR-124_GG-WUR-061_GG-WUR-087_GG-WUR-014_GG-WUR-157_GG-WUR-172_GG-WUR-006_GG-WUR-167_GG-WUR-173_GG-WUR-048_GG-WUR-166_GG-WUR-103_GG-WUR-018_GG-WUR-244_GG-WUR-095_GG-WUR-127_GG-WUR-249_GG-WUR-016_GG-WUR-009_GG-WUR-174_GG-WUR-017_GG-WUR-152_GG-WUR-057_GG-WUR-247_GG-WUR-171_GG-WUR-040_GG-WUR-250_GG-WUR-022_GG-WUR-107_GG-WUR-149_GG-WUR-101_GG-WUR-158_GG-WUR-085_GG-WUR-245_GG-WUR…	8953	61|4|0	missense_variant	MODERATE	OPTN	ENSGALG00000013738	ENSGALT00000022327	9/14	-	1008	974	325	T/M	aCg/aTg	-	deleterious(0.02)	-1.697	Coiled-coils_(Ncoils):Coil&PTHR31553&PTHR31553:SF2	autophagosome [GO:0005776]; cytoplasmic vesicle [GO:0031410]; Golgi apparatus [GO:0005794]; nucleus [GO:0005634]; perinuclear region of cytoplasm [GO:0048471]; trans-Golgi network [GO:0005802]; K63-linked polyubiquitin binding [GO:0070530]; metal ion binding [GO:0046872]; defense response to Gram-negative bacterium [GO:0050829]; Golgi ribbon formation [GO:0090161]; Golgi to plasma membrane protei…	mortality/aging,nervous system,vision/eye,homeostasis	YES
1	6716091	C	T	39985	245	172	490	148	24	W1	0:0,0:0,24:74	.:.,.:.,GG-WUR-061_GG-WUR-087_GG-WUR-014_GG-WUR-157_GG-WUR-172_GG-WUR-268_GG-WUR-173_GG-WUR-048_GG-WUR-166_GG-WUR-244_GG-WUR-127_GG-WUR-249_GG-WUR-009_GG-WUR-174_GG-WUR-017_GG-WUR-057_GG-WUR-171_GG-WUR-250_GG-WUR-022_GG-WUR-107_GG-WUR-101_GG-WUR-158_GG-WUR-109_GG-WUR-074:GG-WUR-064_GG-WUR-106_GG-WUR-105_GG-WUR-038_GG-WUR-124_GG-WUR-242_GG-WUR-046_GG-WUR-110_GG-WUR-131_GG-WUR-264_GG-WUR-049_GG-WUR…	853	67|2|0	missense_variant	MODERATE	MCM10	ENSGALG00000034198	ENSGALT00000065648	2/19	-	350	116	39	P/L	cCa/cTa	-	tolerated(0.09)	-5.536	PTHR13454	nucleus [GO:0005634]; DNA replication [GO:0006260]	embryo,mortality/aging,cellular,homeostasis	YES
1	123534963	T	A	31980.5	248	146	496	108	38	W1	0:0,0:0,38:54	.:.,.:.,GG-WUR-064_GG-WUR-106_GG-WUR-105_GG-WUR-038_GG-WUR-061_GG-WUR-242_GG-WUR-046_GG-WUR-110_GG-WUR-087_GG-WUR-014_GG-WUR-131_GG-WUR-157_GG-WUR-165_GG-WUR-006_GG-WUR-167_GG-WUR-268_GG-WUR-139_GG-WUR-166_GG-WUR-103_GG-WUR-021_GG-WUR-012_GG-WUR-062_GG-WUR-151_GG-WUR-026_GG-WUR-100_GG-WUR-057_GG-WUR-247_GG-WUR-169_GG-WUR-013_GG-WUR-007_GG-WUR-142_GG-WUR-250_GG-WUR-104_GG-WUR-146_GG-WUR-008_GG-WUR…	399	53|21|0	missense_variant	MODERATE	FRMPD4	ENSGALG00000033541	ENSGALT00000049598	12/13	-	2933	2933	978	D/V	gAc/gTc	-	deleterious(0.04)	-2.034	-	cytoskeleton [GO:0005856]cytoskeleton [GO:0005856]	integument,nervous system,behavior	YES
2	90932027	C	T	33629	230	168	460	150	18	W1	0:0,0:0,18:75	.:.,.:.,GG-WUR-105_GG-WUR-124_GG-WUR-242_GG-WUR-087_GG-WUR-131_GG-WUR-165_GG-WUR-139_GG-WUR-062_GG-WUR-100_GG-WUR-044_GG-WUR-250_GG-WUR-104_GG-WUR-022_GG-WUR-066_GG-WUR-148_GG-WUR-109_GG-WUR-015_GG-WUR-074:GG-WUR-064_GG-WUR-106_GG-WUR-038_GG-WUR-061_GG-WUR-046_GG-WUR-110_GG-WUR-014_GG-WUR-264_GG-WUR-049_GG-WUR-128_GG-WUR-157_GG-WUR-065_GG-WUR-020_GG-WUR-172_GG-WUR-266_GG-WUR-006_GG-WUR-161_GG-WUR…	1045	63|2|0	missense_variant	MODERATE	ZNF236	ENSGALG00000013657	ENSGALT00000022206	9/33	-	1144	1144	382	A/T	Gct/Act	-	tolerated(0.06)	-2.51	PTHR24396&PTHR24396:SF21	metal ion binding [GO:0046872]; nucleic acid binding [GO:0003676]metal ion binding [GO:0046872]; nucleic acid binding [GO:0003676]metal ion binding [GO:0046872]; nucleic acid binding [GO:0003676]metal ion binding [GO:0046872]; nucleic acid binding [GO:0003676]metal ion binding [GO:0046872]; nucleic acid binding [GO:0003676]metal ion binding [GO:0046872]; nucleic acid binding [GO:0003676]	-	YES
2	106437824	G	A	18450.2	213	123	426	74	49	W1	0:0,0:0,49:37	.:.,.:.,GG-WUR-064_GG-WUR-106_GG-WUR-038_GG-WUR-061_GG-WUR-242_GG-WUR-131_GG-WUR-264_GG-WUR-128_GG-WUR-165_GG-WUR-020_GG-WUR-006_GG-WUR-161_GG-WUR-098_GG-WUR-047_GG-WUR-173_GG-WUR-048_GG-WUR-166_GG-WUR-024_GG-WUR-095_GG-WUR-010_GG-WUR-091_GG-WUR-127_GG-WUR-016_GG-WUR-012_GG-WUR-009_GG-WUR-099_GG-WUR-057_GG-WUR-025_GG-WUR-013_GG-WUR-171_GG-WUR-142_GG-WUR-040_GG-WUR-019_GG-WUR-104_GG-WUR-022_GG-WUR…	1297	50|2|35	missense_variant	MODERATE	DSG2	ENSGALG00000015142	ENSGALT00000024433	12/15	-	1843	1843	615	A/T	Gcg/Acg	-	tolerated(0.07)	-2.906	Low_complexity_(Seg):seg&Transmembrane_helices:TMhelix&PTHR24025&PTHR24025:SF1	cell surface [GO:0009986]; desmosome [GO:0030057]; extracellular exosome [GO:0070062]; integral component of membrane [GO:0016021]; intercalated disc [GO:0014704]; plasma membrane [GO:0005886]; calcium ion binding [GO:0005509]; bundle of His cell-Purkinje myocyte adhesion involved in cell communication [GO:0086073]; desmosome organization [GO:0002934]; homophilic cell adhesion via plasma membrane…	mortality/aging,cellular	YES
3	57020862	T	A	30942	245	148	490	118	30	W1	0:0,0:0,30:59	.:.,.:.,GG-WUR-064_GG-WUR-046_GG-WUR-110_GG-WUR-087_GG-WUR-049_GG-WUR-020_GG-WUR-266_GG-WUR-006_GG-WUR-139_GG-WUR-021_GG-WUR-016_GG-WUR-045_GG-WUR-265_GG-WUR-017_GG-WUR-152_GG-WUR-099_GG-WUR-100_GG-WUR-025_GG-WUR-013_GG-WUR-142_GG-WUR-250_GG-WUR-022_GG-WUR-066_GG-WUR-246_GG-WUR-145_GG-WUR-011_GG-WUR-015_GG-WUR-150_GG-WUR-093_GG-WUR-074:GG-WUR-106_GG-WUR-105_GG-WUR-124_GG-WUR-061_GG-WUR-242_GG-WUR…	337	42|19|21	missense_variant	MODERATE	TAAR1	ENSGALG00000013994	ENSGALT00000022674	1/1	-	868	868	290	Y/N	Tat/Aat	-	deleterious(0)	-8.536	PROSITE_profiles:PS50262&PTHR24249&PTHR24249:SF220&1.20.1070.10&Pfam_domain:PF00001&SMART_domains:SM01381&Superfamily_domains:SSF81321&Prints_domain:PR00237&Transmembrane_helices:TMhelix	integral component of membrane [GO:0016021]; trace-amine receptor activity [GO:0001594]; cAMP biosynthetic process [GO:0006171]	nervous system,homeostasis,behavior	YES
3	88306357	A	T	36350.8	247	190	494	182	8	W1	0:0,0:0,8:91	.:.,.:.,GG-WUR-242_GG-WUR-165_GG-WUR-065_GG-WUR-234_GG-WUR-098_GG-WUR-173_GG-WUR-100_GG-WUR-101:GG-WUR-064_GG-WUR-106_GG-WUR-105_GG-WUR-038_GG-WUR-124_GG-WUR-061_GG-WUR-046_GG-WUR-110_GG-WUR-087_GG-WUR-014_GG-WUR-131_GG-WUR-264_GG-WUR-049_GG-WUR-128_GG-WUR-157_GG-WUR-020_GG-WUR-172_GG-WUR-266_GG-WUR-006_GG-WUR-161_GG-WUR-167_GG-WUR-047_GG-WUR-268_GG-WUR-144_GG-WUR-139_GG-WUR-048_GG-WUR-166_GG-WUR…	417	52|4|0	missense_variant	MODERATE	MLIP	ENSGALG00000016301	ENSGALT00000055273	3/11	-	814	814	272	L/M	Ttg/Atg	-	deleterious(0.05)	-0.531	PTHR31514&PTHR31514:SF1	-	-	YES
4	35018720	C	G	54708.5	238	185	476	180	5	W1	0:0,0:0,5:90	.:.,.:.,GG-WUR-020_GG-WUR-268_GG-WUR-021_GG-WUR-067_GG-WUR-011:GG-WUR-064_GG-WUR-106_GG-WUR-105_GG-WUR-124_GG-WUR-061_GG-WUR-046_GG-WUR-110_GG-WUR-087_GG-WUR-014_GG-WUR-131_GG-WUR-049_GG-WUR-128_GG-WUR-157_GG-WUR-165_GG-WUR-065_GG-WUR-172_GG-WUR-266_GG-WUR-006_GG-WUR-161_GG-WUR-167_GG-WUR-098_GG-WUR-047_GG-WUR-173_GG-WUR-144_GG-WUR-048_GG-WUR-166_GG-WUR-103_GG-WUR-018_GG-WUR-024_GG-WUR-244_GG-WUR…	1295	57|3|0	missense_variant	MODERATE	FRAS1	ENSGALG00000010316	ENSGALT00000038383	73/73	-	11811	11568	3856	Q/H	caG/caC	-	deleterious(0.01)	-4.236	PTHR11878&PTHR11878:SF29	integral component of membrane [GO:0016021]; sublamina densa [GO:0061618]; cell communication [GO:0007154]; embryonic limb morphogenesis [GO:0030326]; metanephros morphogenesis [GO:0003338]; morphogenesis of an epithelium [GO:0002009]; palate development [GO:0060021]; protein transport [GO:0015031]; skin development [GO:0043588]	embryo,liver/biliary,respiratory,skeleton,reproductive,pigmentation,craniofacial,nervous system,endocrine/exocrine,limbs/digits/tail,hearing/vestibular/ear,renal/urinary,muscle,vision/eye,cellular,no abnormal phenotype observed,mortality/aging,integument,digestive/alimentary,growth/size/body,cardiovascular	YES
4	66673990	C	G	39733.8	247	182	494	166	16	W1	0:0,0:0,16:83	.:.,.:.,GG-WUR-105_GG-WUR-061_GG-WUR-014_GG-WUR-131_GG-WUR-006_GG-WUR-095_GG-WUR-067_GG-WUR-016_GG-WUR-012_GG-WUR-062_GG-WUR-013_GG-WUR-168_GG-WUR-086_GG-WUR-149_GG-WUR-145_GG-WUR-074:GG-WUR-064_GG-WUR-106_GG-WUR-038_GG-WUR-124_GG-WUR-242_GG-WUR-046_GG-WUR-110_GG-WUR-087_GG-WUR-264_GG-WUR-049_GG-WUR-128_GG-WUR-157_GG-WUR-165_GG-WUR-065_GG-WUR-020_GG-WUR-172_GG-WUR-266_GG-WUR-161_GG-WUR-234_GG-WUR…	736	49|2|0	missense_variant	MODERATE	CWH43	ENSGALG00000041921	ENSGALT00000046588	2/16	-	177	177	59	K/N	aaG/aaC	-	deleterious(0.01)	-3.602	PTHR14859:SF1&PTHR14859	integral component of membrane [GO:0016021]	immune,hematopoietic,mortality/aging	YES
4	70320350	T	C	40372.6	249	179	498	156	23	W1	0:0,0:0,23:78	.:.,.:.,GG-WUR-064_GG-WUR-049_GG-WUR-157_GG-WUR-098_GG-WUR-047_GG-WUR-024_GG-WUR-091_GG-WUR-016_GG-WUR-151_GG-WUR-170_GG-WUR-099_GG-WUR-247_GG-WUR-169_GG-WUR-044_GG-WUR-142_GG-WUR-250_GG-WUR-107_GG-WUR-066_GG-WUR-146_GG-WUR-008_GG-WUR-023_GG-WUR-085_GG-WUR-245:GG-WUR-106_GG-WUR-105_GG-WUR-038_GG-WUR-124_GG-WUR-061_GG-WUR-242_GG-WUR-046_GG-WUR-110_GG-WUR-087_GG-WUR-014_GG-WUR-131_GG-WUR-264_GG-WUR…	1114	43|4|0	missense_variant	MODERATE	C4orf19	ENSGALG00000027885	ENSGALT00000045833	3/3	-	721	721	241	S/G	Agc/Ggc	-	deleterious(0.01)	-0.955	PTHR16106&Pfam_domain:PF15770	cell junction [GO:0030054]; nucleoplasm [GO:0005654]	-	YES
4	70320754	G	A	41332.7	248	202	496	202	0	W1	0:0,0:0,0:101	.:.,.:.,.:GG-WUR-064_GG-WUR-106_GG-WUR-105_GG-WUR-038_GG-WUR-124_GG-WUR-061_GG-WUR-242_GG-WUR-046_GG-WUR-110_GG-WUR-087_GG-WUR-014_GG-WUR-131_GG-WUR-264_GG-WUR-049_GG-WUR-128_GG-WUR-157_GG-WUR-165_GG-WUR-065_GG-WUR-020_GG-WUR-172_GG-WUR-266_GG-WUR-006_GG-WUR-161_GG-WUR-234_GG-WUR-167_GG-WUR-098_GG-WUR-047_GG-WUR-268_GG-WUR-173_GG-WUR-144_GG-WUR-139_GG-WUR-048_GG-WUR-166_GG-WUR-103_GG-WUR-018_GG-W…	932	43|4|0	splice_donor_variant	HIGH	C4orf19	ENSGALG00000027885	ENSGALT00000045833	-	2/2	-	-	-	-	-	-	-	NA	-	cell junction [GO:0030054]; nucleoplasm [GO:0005654]	-	YES
5	48722593	C	T	40326.8	244	174	488	156	18	W1	0:0,0:0,18:78	.:.,.:.,GG-WUR-061_GG-WUR-157_GG-WUR-161_GG-WUR-098_GG-WUR-047_GG-WUR-024_GG-WUR-091_GG-WUR-016_GG-WUR-012_GG-WUR-026_GG-WUR-017_GG-WUR-171_GG-WUR-040_GG-WUR-066_GG-WUR-023_GG-WUR-101_GG-WUR-158_GG-WUR-074:GG-WUR-064_GG-WUR-106_GG-WUR-105_GG-WUR-038_GG-WUR-124_GG-WUR-242_GG-WUR-046_GG-WUR-110_GG-WUR-087_GG-WUR-014_GG-WUR-131_GG-WUR-264_GG-WUR-049_GG-WUR-128_GG-WUR-165_GG-WUR-065_GG-WUR-020_GG-WUR…	645	58|5|0	missense_variant	MODERATE	-	ENSGALG00000028897	ENSGALT00000042737	7/7	-	1500	731	244	S/L	tCg/tTg	-	tolerated(0.25)	-2.607	PROSITE_profiles:PS50082&PROSITE_profiles:PS50294&PTHR22847&PTHR22847:SF479&2.130.10.10&SMART_domains:SM00320&Superfamily_domains:SSF50978	-	-	YES
5	51583811	G	A	16703.3	197	144	394	144	0	W1	0:0,0:0,0:72	.:.,.:.,.:GG-WUR-064_GG-WUR-106_GG-WUR-124_GG-WUR-061_GG-WUR-242_GG-WUR-046_GG-WUR-110_GG-WUR-087_GG-WUR-131_GG-WUR-264_GG-WUR-049_GG-WUR-128_GG-WUR-157_GG-WUR-165_GG-WUR-065_GG-WUR-020_GG-WUR-172_GG-WUR-006_GG-WUR-234_GG-WUR-167_GG-WUR-098_GG-WUR-047_GG-WUR-144_GG-WUR-139_GG-WUR-048_GG-WUR-166_GG-WUR-018_GG-WUR-244_GG-WUR-269_GG-WUR-095_GG-WUR-091_GG-WUR-067_GG-WUR-012_GG-WUR-062_GG-WUR-151_GG-W…	1070	46|22|0	missense_variant	MODERATE	INF2	ENSGALG00000011608	ENSGALT00000018958	7/21	-	1201	1186	396	G/R	Ggg/Agg	-	deleterious_low_confidence(0.01)	-0.911	PTHR23213&PTHR23213:SF5	perinuclear region of cytoplasm [GO:0048471]; actin cytoskeleton organization [GO:0030036]; regulation of mitochondrial fission [GO:0090140]	reproductive	YES
6	16774414	C	T	43575.4	247	174	494	152	22	W1	0:0,0:0,22:76	.:.,.:.,GG-WUR-106_GG-WUR-065_GG-WUR-020_GG-WUR-098_GG-WUR-268_GG-WUR-173_GG-WUR-139_GG-WUR-048_GG-WUR-018_GG-WUR-067_GG-WUR-249_GG-WUR-062_GG-WUR-151_GG-WUR-044_GG-WUR-171_GG-WUR-019_GG-WUR-022_GG-WUR-158_GG-WUR-102_GG-WUR-085_GG-WUR-109_GG-WUR-093:GG-WUR-064_GG-WUR-105_GG-WUR-038_GG-WUR-124_GG-WUR-061_GG-WUR-242_GG-WUR-046_GG-WUR-110_GG-WUR-087_GG-WUR-014_GG-WUR-131_GG-WUR-049_GG-WUR-128_GG-WUR…	1193	61|12|0	stop_gained	HIGH	NOLC1	ENSGALG00000041124	ENSGALT00000052165	5/11	-	601	601	201	R/*	Cga/Tga	-	-	NA	PTHR23216	-	-	YES
6	27508476	G	A	42525.9	226	180	452	176	4	W1	0:0,0:0,4:88	.:.,.:.,GG-WUR-128_GG-WUR-157_GG-WUR-146_GG-WUR-246:GG-WUR-064_GG-WUR-106_GG-WUR-105_GG-WUR-038_GG-WUR-124_GG-WUR-061_GG-WUR-242_GG-WUR-046_GG-WUR-110_GG-WUR-087_GG-WUR-014_GG-WUR-131_GG-WUR-049_GG-WUR-165_GG-WUR-065_GG-WUR-020_GG-WUR-172_GG-WUR-266_GG-WUR-006_GG-WUR-161_GG-WUR-167_GG-WUR-098_GG-WUR-047_GG-WUR-268_GG-WUR-173_GG-WUR-144_GG-WUR-139_GG-WUR-048_GG-WUR-166_GG-WUR-103_GG-WUR-018_GG-WUR…	1419	63|4|0	missense_variant	MODERATE	NRAP	ENSGALG00000008914	ENSGALT00000014498	6/42	-	493	493	165	R/C	Cgt/Tgt	-	deleterious(0.04)	-1.796	PROSITE_profiles:PS51216&PTHR11039	fascia adherens [GO:0005916]; muscle tendon junction [GO:0005927]; myofibril [GO:0030016]; zinc ion binding [GO:0008270]	embryo,growth/size/body,liver/biliary,digestive/alimentary,cellular,mortality/aging,integument,nervous system,hematopoietic,cardiovascular	YES
10	2639242	C	T	37785.6	230	161	460	134	27	W1	0:0,0:0,27:67	.:.,.:.,GG-WUR-064_GG-WUR-087_GG-WUR-014_GG-WUR-065_GG-WUR-172_GG-WUR-006_GG-WUR-047_GG-WUR-173_GG-WUR-144_GG-WUR-021_GG-WUR-267_GG-WUR-091_GG-WUR-016_GG-WUR-045_GG-WUR-017_GG-WUR-057_GG-WUR-013_GG-WUR-168_GG-WUR-005_GG-WUR-148_GG-WUR-023_GG-WUR-149_GG-WUR-246_GG-WUR-158_GG-WUR-145_GG-WUR-011_GG-WUR-015:GG-WUR-106_GG-WUR-105_GG-WUR-038_GG-WUR-124_GG-WUR-061_GG-WUR-242_GG-WUR-046_GG-WUR-110_GG-WUR…	543	53|15|0	missense_variant	MODERATE	CSPG4	ENSGALG00000002678	ENSGALT00000004220	10/10	-	5383	5383	1795	G/S	Ggt/Agt	-	tolerated(0.26)	-2.51	PTHR15036&PTHR15036:SF17&Pfam_domain:PF16184	cell projection [GO:0042995]; cell surface [GO:0009986]; extracellular exosome [GO:0070062]; focal adhesion [GO:0005925]; integral component of plasma membrane [GO:0005887]; intracellular [GO:0005622]; activation of MAPK activity [GO:0000187]; cell migration [GO:0016477]; cell proliferation [GO:0008283]; glial cell migration [GO:0008347]; intracellular signal transduction [GO:0035556]; positive r…	immune,growth/size/body,adipose,liver/biliary,hearing/vestibular/ear,homeostasis,cellular,no abnormal phenotype observed,nervous system,hematopoietic	YES
10	2639391	C	T	35197.1	232	158	464	130	28	W1	0:0,0:0,28:65	.:.,.:.,GG-WUR-064_GG-WUR-087_GG-WUR-014_GG-WUR-065_GG-WUR-172_GG-WUR-006_GG-WUR-161_GG-WUR-047_GG-WUR-173_GG-WUR-144_GG-WUR-021_GG-WUR-091_GG-WUR-016_GG-WUR-026_GG-WUR-045_GG-WUR-017_GG-WUR-057_GG-WUR-013_GG-WUR-168_GG-WUR-005_GG-WUR-148_GG-WUR-023_GG-WUR-149_GG-WUR-246_GG-WUR-158_GG-WUR-145_GG-WUR-011_GG-WUR-015:GG-WUR-106_GG-WUR-105_GG-WUR-038_GG-WUR-124_GG-WUR-061_GG-WUR-242_GG-WUR-046_GG-WUR…	479	53|15|0	missense_variant	MODERATE	CSPG4	ENSGALG00000002678	ENSGALT00000004220	10/10	-	5234	5234	1745	R/Q	cGg/cAg	-	tolerated(0.08)	-2.971	PTHR15036&PTHR15036:SF17&Pfam_domain:PF16184	cell projection [GO:0042995]; cell surface [GO:0009986]; extracellular exosome [GO:0070062]; focal adhesion [GO:0005925]; integral component of plasma membrane [GO:0005887]; intracellular [GO:0005622]; activation of MAPK activity [GO:0000187]; cell migration [GO:0016477]; cell proliferation [GO:0008283]; glial cell migration [GO:0008347]; intracellular signal transduction [GO:0035556]; positive r…	immune,growth/size/body,adipose,liver/biliary,hearing/vestibular/ear,homeostasis,cellular,no abnormal phenotype observed,nervous system,hematopoietic	YES
10	2642088	G	A	22872.7	217	137	434	106	31	W1	0:0,0:0,31:53	.:.,.:.,GG-WUR-064_GG-WUR-242_GG-WUR-087_GG-WUR-065_GG-WUR-172_GG-WUR-047_GG-WUR-173_GG-WUR-144_GG-WUR-048_GG-WUR-103_GG-WUR-269_GG-WUR-021_GG-WUR-095_GG-WUR-091_GG-WUR-016_GG-WUR-009_GG-WUR-174_GG-WUR-045_GG-WUR-017_GG-WUR-099_GG-WUR-100_GG-WUR-057_GG-WUR-168_GG-WUR-007_GG-WUR-023_GG-WUR-149_GG-WUR-246_GG-WUR-158_GG-WUR-145_GG-WUR-015_GG-WUR-150:GG-WUR-106_GG-WUR-105_GG-WUR-038_GG-WUR-124_GG-WUR…	603	53|15|0	missense_variant	MODERATE	CSPG4	ENSGALG00000002678	ENSGALT00000004220	5/10	-	2017-12-03	2017-12-03	2017-12-22	T/M	aCg/aTg	-	deleterious(0.03)	-3.271	PTHR15036&PTHR15036:SF17&Pfam_domain:PF16184	cell projection [GO:0042995]; cell surface [GO:0009986]; extracellular exosome [GO:0070062]; focal adhesion [GO:0005925]; integral component of plasma membrane [GO:0005887]; intracellular [GO:0005622]; activation of MAPK activity [GO:0000187]; cell migration [GO:0016477]; cell proliferation [GO:0008283]; glial cell migration [GO:0008347]; intracellular signal transduction [GO:0035556]; positive r…	immune,growth/size/body,adipose,liver/biliary,hearing/vestibular/ear,homeostasis,cellular,no abnormal phenotype observed,nervous system,hematopoietic	YES
10	4033433	G	A	29463.4	245	147	490	110	37	W1	0:0,0:0,37:55	.:.,.:.,GG-WUR-105_GG-WUR-038_GG-WUR-124_GG-WUR-242_GG-WUR-087_GG-WUR-014_GG-WUR-165_GG-WUR-172_GG-WUR-161_GG-WUR-047_GG-WUR-103_GG-WUR-244_GG-WUR-095_GG-WUR-267_GG-WUR-091_GG-WUR-249_GG-WUR-062_GG-WUR-151_GG-WUR-026_GG-WUR-170_GG-WUR-265_GG-WUR-100_GG-WUR-169_GG-WUR-171_GG-WUR-250_GG-WUR-005_GG-WUR-148_GG-WUR-008_GG-WUR-023_GG-WUR-149_GG-WUR-058_GG-WUR-145_GG-WUR-245_GG-WUR-063_GG-WUR-109_GG-WUR…	69	57|1|0	splice_donor_variant	HIGH	CA12	ENSGALG00000003456	ENSGALT00000060547	-	1/8	-	-	-	-	-	-	-	NA	-	integral component of membrane [GO:0016021]; carbonate dehydratase activity [GO:0004089]; zinc ion binding [GO:0008270]; chloride ion homeostasis [GO:0055064]; one-carbon metabolic process [GO:0006730]	mortality/aging	YES
10	5326607	A	T	29041.5	228	150	456	116	34	W1	0:0,0:0,34:58	.:.,.:.,GG-WUR-106_GG-WUR-105_GG-WUR-038_GG-WUR-061_GG-WUR-157_GG-WUR-161_GG-WUR-167_GG-WUR-098_GG-WUR-047_GG-WUR-166_GG-WUR-127_GG-WUR-067_GG-WUR-016_GG-WUR-062_GG-WUR-151_GG-WUR-026_GG-WUR-174_GG-WUR-265_GG-WUR-057_GG-WUR-247_GG-WUR-169_GG-WUR-044_GG-WUR-019_GG-WUR-104_GG-WUR-022_GG-WUR-066_GG-WUR-008_GG-WUR-101_GG-WUR-246_GG-WUR-158_GG-WUR-058_GG-WUR-248_GG-WUR-109_GG-WUR-093:GG-WUR-064_GG-WUR…	2770	59|6|2	missense_variant	MODERATE	BNIP2	ENSGALG00000003788	ENSGALT00000063805	11/11	-	1007	1007	336	K/I	aAa/aTa	-	deleterious_low_confidence(0)	-0.362	-	cytosol [GO:0005829]; identical protein binding [GO:0042802]; apoptotic process [GO:0006915]	limbs/digits/tail,skeleton	YES
10	7275627	G	A	37337.9	238	188	476	186	2	W1	0:0,0:0,2:93	.:.,.:.,GG-WUR-139_GG-WUR-093:GG-WUR-064_GG-WUR-106_GG-WUR-105_GG-WUR-038_GG-WUR-124_GG-WUR-061_GG-WUR-242_GG-WUR-046_GG-WUR-110_GG-WUR-087_GG-WUR-014_GG-WUR-264_GG-WUR-049_GG-WUR-128_GG-WUR-157_GG-WUR-165_GG-WUR-065_GG-WUR-020_GG-WUR-172_GG-WUR-266_GG-WUR-006_GG-WUR-161_GG-WUR-167_GG-WUR-098_GG-WUR-047_GG-WUR-173_GG-WUR-144_GG-WUR-048_GG-WUR-166_GG-WUR-103_GG-WUR-018_GG-WUR-024_GG-WUR-244_GG-WUR…	2270	6|2|0	missense_variant	MODERATE	CGNL1	ENSGALG00000004294	ENSGALT00000006837	11/19	-	2825	2710	904	R/W	Cgg/Tgg	-	deleterious(0)	1	Coiled-coils_(Ncoils):Coil&PTHR13140&PTHR13140:SF357&Pfam_domain:PF01576	myosin complex [GO:0016459]; motor activity [GO:0003774]myosin complex [GO:0016459]; motor activity [GO:0003774]	-	YES
10	12123738	C	T	23533.1	239	139	478	102	37	W1	0:0,0:0,37:51	.:.,.:.,GG-WUR-110_GG-WUR-165_GG-WUR-065_GG-WUR-172_GG-WUR-006_GG-WUR-161_GG-WUR-167_GG-WUR-173_GG-WUR-166_GG-WUR-103_GG-WUR-024_GG-WUR-021_GG-WUR-267_GG-WUR-010_GG-WUR-127_GG-WUR-249_GG-WUR-026_GG-WUR-174_GG-WUR-170_GG-WUR-017_GG-WUR-057_GG-WUR-169_GG-WUR-044_GG-WUR-007_GG-WUR-142_GG-WUR-040_GG-WUR-250_GG-WUR-243_GG-WUR-107_GG-WUR-066_GG-WUR-148_GG-WUR-008_GG-WUR-086_GG-WUR-246_GG-WUR-102_GG-WUR…	2687	54|4|0	missense_variant	MODERATE	IL16	ENSGALG00000006388	ENSGALT00000010317	7/22	-	1004	859	287	V/M	Gtg/Atg	-	deleterious(0.03)	-0.617	PTHR11324&PTHR11324:SF2	cytoplasm [GO:0005737]; nucleus [GO:0005634]; plasma membrane [GO:0005886]; induction of positive chemotaxis [GO:0050930]; leukocyte chemotaxis [GO:0030595]	immune,hematopoietic	YES
10	20055224	C	T	26997.7	230	137	460	96	41	W1	0:0,0:0,41:48	.:.,.:.,GG-WUR-064_GG-WUR-105_GG-WUR-061_GG-WUR-046_GG-WUR-087_GG-WUR-131_GG-WUR-264_GG-WUR-049_GG-WUR-128_GG-WUR-172_GG-WUR-161_GG-WUR-098_GG-WUR-047_GG-WUR-048_GG-WUR-018_GG-WUR-024_GG-WUR-091_GG-WUR-067_GG-WUR-016_GG-WUR-012_GG-WUR-152_GG-WUR-099_GG-WUR-100_GG-WUR-044_GG-WUR-168_GG-WUR-142_GG-WUR-019_GG-WUR-250_GG-WUR-104_GG-WUR-022_GG-WUR-005_GG-WUR-008_GG-WUR-023_GG-WUR-086_GG-WUR-101_GG-WUR…	7554	53|17|0	missense_variant	MODERATE	IDH2	ENSGALG00000034434	ENSGALT00000061698	6/12	-	591	550	184	V/M	Gtg/Atg	-	deleterious_low_confidence(0.01)	-2.307	PTHR11822&TIGRFAM_domain:TIGR00127&PIRSF_domain:PIRSF000108&Pfam_domain:PF00180&3.40.718.10&SMART_domains:SM01329&Superfamily_domains:SSF53659	isocitrate dehydrogenase (NADP+) activity [GO:0004450]; magnesium ion binding [GO:0000287]; NAD binding [GO:0051287]; isocitrate metabolic process [GO:0006102]; tricarboxylic acid cycle [GO:0006099]	nervous system,behavior,growth/size/body,neoplasm,respiratory,cellular,mortality/aging,muscle,homeostasis,cardiovascular	YES
12	6503457	G	A	31238.2	242	154	484	120	34	W1	0:0,0:0,34:60	.:.,.:.,GG-WUR-105_GG-WUR-110_GG-WUR-131_GG-WUR-165_GG-WUR-065_GG-WUR-173_GG-WUR-144_GG-WUR-048_GG-WUR-024_GG-WUR-010_GG-WUR-062_GG-WUR-009_GG-WUR-151_GG-WUR-026_GG-WUR-045_GG-WUR-170_GG-WUR-025_GG-WUR-247_GG-WUR-168_GG-WUR-007_GG-WUR-142_GG-WUR-250_GG-WUR-022_GG-WUR-243_GG-WUR-146_GG-WUR-005_GG-WUR-008_GG-WUR-246_GG-WUR-248_GG-WUR-145_GG-WUR-102_GG-WUR-245_GG-WUR-063_GG-WUR-109:GG-WUR-064_GG-WUR…	1538	7|0|0	missense_variant	MODERATE	WNK2	ENSGALG00000038850	ENSGALT00000047415	18/29	-	4500	3818	1273	T/I	aCt/aTt	-	deleterious(0.01)	1	PTHR13902&PTHR13902:SF10	ATP binding [GO:0005524]; protein serine/threonine kinase activity [GO:0004674]ATP binding [GO:0005524]; protein serine/threonine kinase activity [GO:0004674]ATP binding [GO:0005524]; protein serine/threonine kinase activity [GO:0004674]ATP binding [GO:0005524]; protein serine/threonine kinase activity [GO:0004674]integral component of membrane [GO:0016021]; ATP binding [GO:0005524]; protein seri…	-	YES
15	6980547	A	G	35235.2	228	138	456	100	38	W1	0:0,0:0,38:50	.:.,.:.,GG-WUR-106_GG-WUR-105_GG-WUR-046_GG-WUR-128_GG-WUR-157_GG-WUR-172_GG-WUR-266_GG-WUR-161_GG-WUR-098_GG-WUR-268_GG-WUR-173_GG-WUR-144_GG-WUR-139_GG-WUR-048_GG-WUR-103_GG-WUR-018_GG-WUR-244_GG-WUR-010_GG-WUR-127_GG-WUR-062_GG-WUR-009_GG-WUR-174_GG-WUR-152_GG-WUR-057_GG-WUR-169_GG-WUR-013_GG-WUR-044_GG-WUR-142_GG-WUR-104_GG-WUR-107_GG-WUR-146_GG-WUR-148_GG-WUR-149_GG-WUR-101_GG-WUR-102_GG-WUR…	430	59|9|2	missense_variant	MODERATE	SGSM1	ENSGALG00000005379	ENSGALT00000008642	19/25	-	2225	2225	742	N/S	aAc/aGc	-	tolerated(0.08)	-4.292	PROSITE_profiles:PS50086&SMART_domains:SM00164	cytoplasmic vesicle membrane [GO:0030659]; cytosol [GO:0005829]; endomembrane system [GO:0012505]; intracellular [GO:0005622]; GTPase activator activity [GO:0005096]; Rab GTPase binding [GO:0017137]; activation of GTPase activity [GO:0090630]; intracellular protein transport [GO:0006886]; regulation of vesicle fusion [GO:0031338]	homeostasis	YES
15	7879345	A	T	39825.1	242	200	484	200	0	W1	0:0,0:0,0:100	.:.,.:.,.:GG-WUR-064_GG-WUR-106_GG-WUR-105_GG-WUR-038_GG-WUR-124_GG-WUR-061_GG-WUR-242_GG-WUR-046_GG-WUR-110_GG-WUR-087_GG-WUR-014_GG-WUR-131_GG-WUR-049_GG-WUR-128_GG-WUR-157_GG-WUR-165_GG-WUR-065_GG-WUR-020_GG-WUR-172_GG-WUR-266_GG-WUR-006_GG-WUR-161_GG-WUR-234_GG-WUR-167_GG-WUR-098_GG-WUR-047_GG-WUR-268_GG-WUR-173_GG-WUR-144_GG-WUR-139_GG-WUR-048_GG-WUR-166_GG-WUR-103_GG-WUR-018_GG-WUR-024_GG-W…	377	45|21|0	missense_variant	MODERATE	SUSD2	ENSGALG00000005824	ENSGALT00000009356	13/15	-	2392	2392	798	F/I	Ttc/Atc	-	deleterious(0)	-4.823	PROSITE_profiles:PS50923&PTHR13802:SF43&PTHR13802&2.10.70.10&Pfam_domain:PF00084&SMART_domains:SM00032&Superfamily_domains:SSF57535	extracellular exosome [GO:0070062]; integral component of membrane [GO:0016021]; plasma membrane [GO:0005886]; polysaccharide binding [GO:0030247]; scavenger receptor activity [GO:0005044]; immune response [GO:0006955]; negative regulation of cell cycle G1/S phase transition [GO:1902807]; negative regulation of cell division [GO:0051782]	-	YES
15	7880793	G	A	53989.7	249	202	498	202	0	W1	0:0,0:0,0:101	.:.,.:.,.:GG-WUR-064_GG-WUR-106_GG-WUR-105_GG-WUR-038_GG-WUR-124_GG-WUR-061_GG-WUR-242_GG-WUR-046_GG-WUR-110_GG-WUR-087_GG-WUR-014_GG-WUR-131_GG-WUR-264_GG-WUR-049_GG-WUR-128_GG-WUR-157_GG-WUR-165_GG-WUR-065_GG-WUR-020_GG-WUR-172_GG-WUR-266_GG-WUR-006_GG-WUR-161_GG-WUR-234_GG-WUR-167_GG-WUR-098_GG-WUR-047_GG-WUR-268_GG-WUR-173_GG-WUR-144_GG-WUR-139_GG-WUR-048_GG-WUR-166_GG-WUR-103_GG-WUR-018_GG-W…	876	45|21|0	missense_variant	MODERATE	SUSD2	ENSGALG00000005824	ENSGALT00000009356	11/15	-	1808	1808	603	T/M	aCg/aTg	-	deleterious(0.03)	-1.763	PROSITE_profiles:PS51233&PTHR13802:SF43&PTHR13802&Pfam_domain:PF00094&SMART_domains:SM00216	extracellular exosome [GO:0070062]; integral component of membrane [GO:0016021]; plasma membrane [GO:0005886]; polysaccharide binding [GO:0030247]; scavenger receptor activity [GO:0005044]; immune response [GO:0006955]; negative regulation of cell cycle G1/S phase transition [GO:1902807]; negative regulation of cell division [GO:0051782]	-	YES
17	6983942	T	C	29691.8	237	146	474	110	36	W1	0:0,0:0,36:55	.:.,.:.,GG-WUR-124_GG-WUR-046_GG-WUR-087_GG-WUR-264_GG-WUR-049_GG-WUR-128_GG-WUR-065_GG-WUR-020_GG-WUR-172_GG-WUR-161_GG-WUR-098_GG-WUR-047_GG-WUR-144_GG-WUR-024_GG-WUR-244_GG-WUR-021_GG-WUR-267_GG-WUR-010_GG-WUR-067_GG-WUR-016_GG-WUR-062_GG-WUR-174_GG-WUR-017_GG-WUR-057_GG-WUR-169_GG-WUR-044_GG-WUR-171_GG-WUR-019_GG-WUR-250_GG-WUR-104_GG-WUR-107_GG-WUR-008_GG-WUR-101_GG-WUR-085_GG-WUR-015_GG-WUR…	2720	53|5|0	missense_variant	MODERATE	SETX	ENSGALG00000003661	ENSGALT00000005801	9/25	-	1374	1201	401	R/G	Aga/Gga	-	deleterious(0.03)	1	PTHR10887&PTHR10887:SF377	axon [GO:0030424]; cytoplasm [GO:0005737]; growth cone [GO:0030426]; nuclear chromosome [GO:0000228]; nucleoplasm [GO:0005654]; transcription termination site sequence-specific DNA binding [GO:0001147]; cellular response to hydrogen peroxide [GO:0070301]; cellular response to retinoic acid [GO:0071300]; circadian rhythm [GO:0007623]; double-strand break repair [GO:0006302]; fibroblast growth fact…	cellular,reproductive,endocrine/exocrine,immune,vision/eye,homeostasis,behavior,hematopoietic	YES
18	1108789	A	G	33786.3	249	146	498	104	42	W1	0:0,0:0,42:52	.:.,.:.,GG-WUR-038_GG-WUR-087_GG-WUR-131_GG-WUR-157_GG-WUR-065_GG-WUR-172_GG-WUR-234_GG-WUR-173_GG-WUR-139_GG-WUR-048_GG-WUR-166_GG-WUR-018_GG-WUR-095_GG-WUR-010_GG-WUR-249_GG-WUR-012_GG-WUR-062_GG-WUR-009_GG-WUR-151_GG-WUR-026_GG-WUR-170_GG-WUR-017_GG-WUR-152_GG-WUR-099_GG-WUR-025_GG-WUR-247_GG-WUR-013_GG-WUR-171_GG-WUR-007_GG-WUR-019_GG-WUR-250_GG-WUR-022_GG-WUR-243_GG-WUR-005_GG-WUR-101_GG-WUR…	1506	49|3|0	missense_variant	MODERATE	-	ENSGALG00000001111	ENSGALT00000001676	17/66	-	3682	3682	1228	T/A	Act/Gct	-	tolerated(0.15)	-3.671	Pfam_domain:PF08393&PTHR10676&PTHR10676:SF257	dynein complex [GO:0030286]; ATP binding [GO:0005524]; ATPase activity [GO:0016887]; microtubule motor activity [GO:0003777]; microtubule-based movement [GO:0007018]	-	YES
18	4612464	C	T	39915.8	239	152	478	118	34	W1	0:0,0:0,34:59	.:.,.:.,GG-WUR-061_GG-WUR-242_GG-WUR-046_GG-WUR-157_GG-WUR-165_GG-WUR-065_GG-WUR-172_GG-WUR-006_GG-WUR-173_GG-WUR-048_GG-WUR-103_GG-WUR-018_GG-WUR-127_GG-WUR-067_GG-WUR-012_GG-WUR-062_GG-WUR-009_GG-WUR-026_GG-WUR-170_GG-WUR-152_GG-WUR-099_GG-WUR-057_GG-WUR-025_GG-WUR-169_GG-WUR-171_GG-WUR-007_GG-WUR-019_GG-WUR-066_GG-WUR-101_GG-WUR-158_GG-WUR-063_GG-WUR-150_GG-WUR-093_GG-WUR-074:GG-WUR-064_GG-WUR…	908	47|24|5	missense_variant	MODERATE	-	ENSGALG00000002108	ENSGALT00000003290	22/22	-	5425	5425	1809	P/S	Cca/Tca	-	tolerated(0.35)	-3.59	PTHR23169&PTHR23169:SF7	cell-cell adherens junction [GO:0005913]; cornified envelope [GO:0001533]; cytoplasm [GO:0005737]; extracellular exosome [GO:0070062]; intermediate filament cytoskeleton [GO:0045111]; structural molecule activity [GO:0005198]; cell-cell adhesion [GO:0098609]; keratinocyte differentiation [GO:0030216]; peptide cross-linking [GO:0018149]	-	YES
20	5249404	T	C	43006.5	245	180	490	164	16	W1	0:0,0:0,16:82	.:.,.:.,GG-WUR-110_GG-WUR-128_GG-WUR-020_GG-WUR-172_GG-WUR-139_GG-WUR-166_GG-WUR-103_GG-WUR-267_GG-WUR-091_GG-WUR-062_GG-WUR-100_GG-WUR-057_GG-WUR-142_GG-WUR-104_GG-WUR-146_GG-WUR-023:GG-WUR-106_GG-WUR-105_GG-WUR-038_GG-WUR-124_GG-WUR-061_GG-WUR-242_GG-WUR-046_GG-WUR-087_GG-WUR-014_GG-WUR-264_GG-WUR-049_GG-WUR-157_GG-WUR-165_GG-WUR-065_GG-WUR-266_GG-WUR-161_GG-WUR-234_GG-WUR-167_GG-WUR-098_GG-WUR…	5471	47|23|0	missense_variant	MODERATE	-	ENSGALG00000003921	ENSGALT00000006247	3/4	-	326	314	105	E/G	gAg/gGg	-	deleterious(0)	-3.237	Pfam_domain:PF04440&PTHR16294	cytoplasm [GO:0005737]cytoplasm [GO:0005737]	-	YES
20	10169905	A	T	18678.9	237	138	474	100	38	W1	0:0,0:0,38:50	.:.,.:.,GG-WUR-106_GG-WUR-242_GG-WUR-046_GG-WUR-110_GG-WUR-128_GG-WUR-157_GG-WUR-065_GG-WUR-266_GG-WUR-098_GG-WUR-173_GG-WUR-144_GG-WUR-103_GG-WUR-018_GG-WUR-091_GG-WUR-067_GG-WUR-151_GG-WUR-174_GG-WUR-152_GG-WUR-099_GG-WUR-025_GG-WUR-247_GG-WUR-168_GG-WUR-142_GG-WUR-040_GG-WUR-019_GG-WUR-250_GG-WUR-107_GG-WUR-066_GG-WUR-023_GG-WUR-086_GG-WUR-149_GG-WUR-246_GG-WUR-058_GG-WUR-248_GG-WUR-085_GG-WUR…	-57	0|0|0	splice_donor_variant&non_coding_transcript_variant	HIGH	-	ENSGALG00000036091	ENSGALT00000051425	-	1/1	-	-	-	-	-	-	-	NA	-		-	YES
21	2174057	G	A	29647.4	247	148	494	108	40	W1	0:0,0:0,40:54	.:.,.:.,GG-WUR-105_GG-WUR-038_GG-WUR-124_GG-WUR-242_GG-WUR-046_GG-WUR-110_GG-WUR-087_GG-WUR-131_GG-WUR-165_GG-WUR-266_GG-WUR-006_GG-WUR-167_GG-WUR-098_GG-WUR-139_GG-WUR-166_GG-WUR-103_GG-WUR-018_GG-WUR-095_GG-WUR-010_GG-WUR-091_GG-WUR-009_GG-WUR-026_GG-WUR-045_GG-WUR-170_GG-WUR-017_GG-WUR-099_GG-WUR-013_GG-WUR-044_GG-WUR-168_GG-WUR-019_GG-WUR-104_GG-WUR-022_GG-WUR-148_GG-WUR-023_GG-WUR-149_GG-WUR…	1611	46|16|0	missense_variant	MODERATE	VWA1	ENSGALG00000001527	ENSGALT00000002321	3/6	-	751	751	251	P/S	Cca/Tca	-	tolerated(0.14)	-5.92	PROSITE_profiles:PS50853&Pfam_domain:PF00041&2.60.40.10&SMART_domains:SM00060&Superfamily_domains:SSF49265	basement membrane [GO:0005604]; extracellular exosome [GO:0070062]; extracellular space [GO:0005615]; interstitial matrix [GO:0005614]; behavioral response to pain [GO:0048266]; extracellular matrix organization [GO:0030198]	integument,nervous system,behavior	YES
26	1300802	T	C	48135.3	227	186	454	186	0	W1	0:0,0:0,0:93	.:.,.:.,.:GG-WUR-064_GG-WUR-106_GG-WUR-105_GG-WUR-038_GG-WUR-124_GG-WUR-061_GG-WUR-046_GG-WUR-110_GG-WUR-087_GG-WUR-014_GG-WUR-131_GG-WUR-264_GG-WUR-049_GG-WUR-128_GG-WUR-157_GG-WUR-165_GG-WUR-065_GG-WUR-020_GG-WUR-172_GG-WUR-266_GG-WUR-006_GG-WUR-161_GG-WUR-234_GG-WUR-167_GG-WUR-098_GG-WUR-047_GG-WUR-268_GG-WUR-173_GG-WUR-144_GG-WUR-139_GG-WUR-048_GG-WUR-166_GG-WUR-103_GG-WUR-018_GG-WUR-024_GG-W…	2718	56|19|5	missense_variant	MODERATE	AHCYL1	ENSGALG00000000329	ENSGALT00000000439	8/15	-	826	803	268	V/A	gTg/gCg	-	deleterious(0.01)	-2.956	PTHR23420:SF3&PTHR23420&PS00739&3.40.50.1480&Pfam_domain:PF00670&SMART_domains:SM00996&SMART_domains:SM00997&Superfamily_domains:SSF51735	adenosylhomocysteinase activity [GO:0004013]; NAD binding [GO:0051287]; one-carbon metabolic process [GO:0006730]; S-adenosylhomocysteine catabolic process [GO:0019510]adenosylhomocysteinase activity [GO:0004013]; NAD binding [GO:0051287]; one-carbon metabolic process [GO:0006730]; S-adenosylhomocysteine catabolic process [GO:0019510]adenosylhomocysteinase activity [GO:0004013]; NAD binding [GO:0…	skeleton,growth/size/body,adipose,endocrine/exocrine,vision/eye,homeostasis,behavior,hematopoietic,digestive/alimentary	YES
27	3578381	G	A	34349.7	233	149	466	120	29	W1	0:0,0:0,29:60	.:.,.:.,GG-WUR-064_GG-WUR-242_GG-WUR-046_GG-WUR-165_GG-WUR-266_GG-WUR-234_GG-WUR-103_GG-WUR-244_GG-WUR-269_GG-WUR-095_GG-WUR-010_GG-WUR-091_GG-WUR-016_GG-WUR-151_GG-WUR-265_GG-WUR-100_GG-WUR-025_GG-WUR-104_GG-WUR-148_GG-WUR-008_GG-WUR-023_GG-WUR-101_GG-WUR-246_GG-WUR-158_GG-WUR-011_GG-WUR-109_GG-WUR-015_GG-WUR-093_GG-WUR-074:GG-WUR-106_GG-WUR-105_GG-WUR-038_GG-WUR-124_GG-WUR-110_GG-WUR-087_GG-WUR…	1133	60|5|0	missense_variant	MODERATE	DHX8	ENSGALG00000032305	ENSGALT00000077131	3/23	-	244	244	82	P/S	Cct/Tct	-	deleterious(0.02)	-3.328	-	ATP binding [GO:0005524]; ATP-dependent helicase activity [GO:0008026]; nucleic acid binding [GO:0003676]	-	YES
